# Supplementary material for: CRISPR/Cas9-mediated editing of PHYTOENE DESATURASE gene in onion (Allium cepa L.)
Source: Front Plant Sci. 2023 Aug 28;14:1226911. doi: 10.3389/fpls.2023.1226911 (PMC10494252; doi:10.3389/fpls.2023.1226911)
Supplement: Supplementary file 1 [file DataSheet_1.xlsx]

## Sheet: Sheet1
#ID	WT Sequence	RGEN Treated Sequence	Length	Count	Type	HDR
1	GCTGATGCTGGACATACACCTATATTATTGGAAGCTAGAGATGTTCTGGGAGGAAAGGTCTATATGTTAATTCATAATATATTTTTATATTCGATCATAAATTAGTTTATAT	GCTGATGCTGGACATACACCTATATTATTGGAAGCTAGAGATGTTCTGGGAGGAAAGGTCTATATGTTAATTCATAATATATTTTTATATTCGATCATAAATTAGTTTATAT	112	991027	WT	N/A
2	GCTGATGCTGGACATACACCTATATTATTGGAAGCTAGAGATGTTCTGGGAGGAAAGGTCTATATGTTAATTCATAATATATTTTTATATTCGATCATAAATTAGTTTATAT	GCTGATGCTGGACATACACCTATATTATTGGAAGCTAGAGATGTTTTAGGAGGAAAGGTC----------TTCATAATATATTTTTATATTTGATCATAAATTAGTTTATAT	102	806666	del	N/A
3	GCTGATGCTGGACATACACCTATATTATTGGAAGCTAGAGATGTTCTGGGAGGAAAGGTCTATATGTTAATTCATAATATATTTTTATATTCGATCATAAATTAGTTTATAT	GCTGATGCTGGACATACACCTATATTATTGGAAGCTAGAGATGTTTTAGGAGGAAATGTC----------TTCATAATACATTTTTATATTTGATCATAAATTAGTTTATAT	102	699995	del	N/A
4	GCTGATGCTGGACATACACCTATATTATTGGAAGCTAGAGATGTTCTGGGAGGAAAGGTCTATA---TGTTAATTCATAATATATTTTT--------ATATTCGATCATAAATTAGTTTATAT	GCTGATGCTGGACATACACCTATATTATTGGAAGCTAGAGATGTTCTGGGGGGAAAGGTCTATATACTGTT-ATTCATAATA---TTTTCGAACACAATATTTGATCATAAATTAGTTTATAT	119	74121	Ins	N/A
5	GCTGATGCTGGACATACACCTATATTATTGGAAGCTAGAGATGTTCTGGGAGGAAAGGTCTATATGTTAATTCATAATATATTTTTATATTCGATCATAAATTAGTTTATAT	GCTGATGCTGGACATACACCTATATTATTGGAAGCTAGAGATGTTTTAGGAGGAAATGTC----------TTCATAATATATTTTTATATTTGATCATAAATTAGTTTATAT	102	67097	del	N/A
6	GCTGATGCTGGACATACACCTATATTATTGGAAGCTAGAGATGTTCTGGGAGGAAAGGTCTATATGTTAATTCATAATATATTTTTATA-TTCGATCATAAATTAGTTTATAT	GCTGATGCTGGACATACACCTATATTATTGGAAGCTAGAGATGTTTTAGGAGGAAAGGTC----------TTCATAATATATTTTTATATTTTGATCATAAATTAGTTTATAT	103	39302	del	N/A
7	GCTGATGCTGGACATACACCTATATTATTGGAAGCTAGAGATGTTCTGGGAGGAAAGGTCTATATGTTAATTCATAATATATTTTTATATTCGATCATAAATTAGTTTATAT	GCTGATGCTGGACATACACCTATACTATTGGAAGCTAGAGATGTTTTAGGAGGAAAGGTC----------TTCATAATATGTTTTTATATTTGATCATAAATTAGTTTATAT	102	21878	del	N/A
8	GCTGATGCTGGACATACACCTATATTATTGGAAGCTAGAGATGTTCTGGGAGGAAAGGTCTATATGTTAATTCATAATATATTTTTATATTCGATCATAAATTAGTTTATAT	GCTGATGCTGGACATACACCTATATTATTGGAAGCTAGAGATGTTTTAGGAGGAAAGGTC----------TTCATAATATATTTTTGTATTTGATCATAAATTAGTTTATAT	102	16179	del	N/A
9	GCTGATGCTGGACATACACCTATATTATTGGAAGCTAGAGATGTTCTGGGAGGAAAGGTCTATATGTTAATTCATAATATATTTTTATATTCGATCATAAATTAGTTTATAT	GCTGATGCTGGACATACACCTATATTATTGGAAGCTAGAGATGTTTTAGGAGGAAAGGTC----------TTCATAATACATTTTTATATTTGATCATAAATTAGTTTATAT	102	8571	del	N/A
10	GCTGATGCTGGACATACACCTATATTATTGGAAGCTAGAGATGTTCTGGGAGGAAAGGTCTATATGTTAATTCATAATATATTTTTATATTCGATCATAAATTAGTTTATAT	GCTGATGCTGGACATACACCTATATTATTGGAAGCTAGAGATGTTTTAGGAGGAAAGGTCTATATGTTAATTCATAATATATTTTTATATTCGATCATAAATTAGTTTATAT	112	6363	Sub	N/A
11	GCTGATGCTGGACATACACCTATATTATTGGAAGCTAGAGATGTTCTGGGAGGAAAGGTCTATATGTTAATTCATAATATATTTTTATATTCGATCATAAATTAGTTTATAT	GCTGATGCTGGACATACACCTATATTATTGGAAGCTAGAGATGTTCTGGGAGGAAAGGTC----------TTCATAATATATTTTTATATTTGATCATAAATTAGTTTATAT	102	5670	del	N/A
12	GCTGATGCTGGACATACACCTATATTATTGGAAGCTAGAGATGTTCTGGGAGGAAAGGTCTATATGTTAATTCATAATATATTTTTATATTCGATCATAAATTAGTTTATAT	GCTGATGCTGGACATACACCTATATTATTGGAAGCTAGAGATGTTCTGGGAGGAAAGGTCTATATGTTAATTCATAATATATTTTTATATTTGATCATAAATTAGTTTATAT	112	5465	Sub	N/A
13	GCTGATGCTGGACATACACCTATATTATTGGAAGCTAGAGATGTTCTGGGAGGAAAGGTCTATATGTTAATTCATAATATATTTTTATATTCGATCATAAATTAGTTTATAT	GCTGATGCTGGACATACACCTATATTATTGGAAGCTAGAGATGTTTTAGGAGGAAAGGTC----------TTCATAATATATTTTTATATTCGATCATAAATTAGTTTATAT	102	5333	del	N/A
14	GCTGATGCTGGACATACACCTATATTATTGGAAGCTAGAGATGTTCTGGGAGGAAAGGTCTATATGTTAATTCATAATATATTTTTATATTCGATCATAAATTAGTTTATAT	GCTGATGCTGGACATACACCTATATTATTGGAAGCTAGAGATGTTTTAAGAGGAAAGGTC----------TTCATAATATATTTTTATATTTGATCATAAATTAGTTTATAT	102	5266	del	N/A
15	GCTGATGCTGGACATACACCTATATTATTGGAAGCTAGAGATGTTCTGGGAGGAAAGGTCTATA---TGTTAATTCATAATATATTTTT--------ATATTCGATCATAAATTAGTTTATAT	GCTGATGCTGGACATACACCTATATTATTGGAAGCTAGAGATGTTCTGGGGGGAAAGGTCTATACACTGTT-ATTCATAATA---TTTTCGAACACAATATTTGATCATAAGTTAGTTTATAT	119	3706	Ins	N/A
16	GCTGATGCTGGACATACACCTATATTATTGGAAGCTAGAGATGTTCTGGGAGGAAAGGTCTATATGTTAATTCATAATATATTTTTATATTCGATCATAAATTAGTTTATAT	GCTGATGCTGGACATACACCTATATTATTGGAAGCTAGAGATGTTTTAGGAGGAAAGGTC----------TTCATAATATGTTTTTATATTTGATCATAAATTAGTTTATAT	102	2262	del	N/A
17	GCTGATGCTGGACATACACCTATATTATTGGAAGCTAGAGATGTTCTGGGAGGAAAGGTCTATATGTTAATTCATAATATATTTTTATATTCGATCATAAATTAGTTTATAT	GCTGATGCTGGACATACACCTATACTATTGGAAGCTAGAGATGTTCTGGGAGGAAAGGTCTATATGTTAATTCATAATATATTTTTATATTCGATCATAAATTAGTTTATAT	112	1989	Sub	N/A
18	GCTGATGCTGGACATACACCTATATTATTGGAAGCTAGAGATGTTCTGGGAGGAAAGGTCTATATGTTAATTCATAATATATTTTTATATTCGATCATAAATTAGTTTATAT	GCTGATGCTGGACATACACCTATATTATTGGAAGCTAGAGATGTTCTGGGGGGAAAGGTCTATATGTTAATTCATAATATATTTTTATATTCGATCATAAATTAGTTTATAT	112	1962	Sub	N/A
19	#NAME?	GCTGATGCTGGACATACACCGCTGATGCTGGACATACACCTATATTATTGGAAGCTAGAGATGTTCTGGGAGGAAAGGTCTATATGTTAATTCATAATATATTTTTATATTCGATCATAAATTAGTTTATAT	132	1908	Ins	N/A
20	GCTGATGCTGGACATACACCTATATTATTGGAAGCTAGAGATGTTCTGGGAGGAAAGGTCTATATGTTAATTCATAATATATTTTTATATTCGATCATAAATTAGTTTATAT	GCTGATGCTGGACTTACACCTATATTATTGGAAGCTAGAGATGTTCTGGGAGGAAAGGTCTATATGTTAATTCATAATATATTTTTATATTCGATCATAAATTAGTTTATAT	112	1759	Sub	N/A
21	GCTGATGCTGGACATACACCTATATTATTGGAAGCTAGAGATGTTCTGGGAGGAAAGGTCTATATGTTAATTCATAATATATTTTTATATTCGATCATAAATTAGTTTATAT	GCTGATGCTGGACATACACCTATATTATTGGAAGCTAAAGATGTTCTAGGAGGAAAGGTCTATATGTTAGTTCATAATATATTTTTATATTCGATCATAAATTAGTTTATAT	112	1752	Sub	N/A
22	GCTGATGCTGGACATACACCTATATTATTGGAAGCTAGAGATGTTCTGGGAGGAAAGGTCTATATGTTAATTCATAATATATTTTTATATTCGATCATAAATTAGTTTATAT	GCTGATGCTGGACATACACCTATACTATTGGAAGCTAGAGATGTTTTAGGAGGAAAGGTC----------TTCATAATATATTTTTATATTTGATCATAAATTAGTTTATAT	102	1742	del	N/A
23	#NAME?	GCTGATGCTGGACATACACCGCTGATGCTGGACATACACCTATATTATTGGAAGCTAGAGATGTTTTAGGAGGAAAGGTC----------TTCATAATATATTTTTATATTTGATCATAAATTAGTTTATAT	122	1734	Ins	N/A
24	GCTGATGCTGGACATACACCTATATTATTGGAAGCTAGAGATGTTCTGGGAGGAAAGGTCTATATGTTAATTCATAATATATTTTTATATTCGATCATAAATTAGTTTATAT	GCTGATGCTGGACATACACCTATATTATTGGAAGCTAAAGATGTTCTAGGAGGAAAGGTCTATATGTTAATTCATAATATATTTTTATATTTGATCATAAATTAGTTTATGT	112	1630	Sub	N/A
25	GCTGATGCTGGACATACACCTATATTATTGGAAGCTAGAGATGTTCTGGGAGGAAAGGTCTATATGTTAATTCATAATATATTTTTATATTCGATCATAAATTAGTTTATAT	GCTGAGGCTGGACATACACCTATATTATTGGAAGCTAGAGATGTTCTGGGAGGAAAGGTCTATATGTTAATTCATAATATATTTTTATATTCGATCATAAATTAGTTTATAT	112	1613	Sub	N/A
26	GCTGATGCTGGACATACACCTATATTATTGGAAGCTAGAGATGTTCTGGGAGGAAAGGTCTATATGTTAATTCATAATATATTTTTATATTCGATCATAAATTAGTTTATAT	GCTGATGCTGGACTTACACCTATATTATTGGAAGCTAGAGATGTTTTAGGAGGAAAGGTC----------TTCATAATATATTTTTATATTTGATCATAAATTAGTTTATAT	102	1526	del	N/A
27	#NAME?	GCTGATGCTGGACATACACCGCTGATGCTGGACATACACCTATATTATTGGAAGCTAGAGATGTTTTAGGAGGAAATGTC----------TTCATAATACATTTTTATATTTGATCATAAATTAGTTTATAT	122	1462	Ins	N/A
28	GCTGATGCTGGACATACACCTATATTATTGGAAGCTAGAGATGTTCTGGGAGGAAAGGTCTATATGTTAATTCATAATATATTTTTATATTCGATCATAAATTAGTTTATAT	GCTGATGCTGGACATACACCTATATGATTGGAAGCTAGAGATGTTCTGGGAGGAAAGGTCTATATGTTAATTCATAATATATTTTTATATTCGATCATAAATTAGTTTATAT	112	1415	Sub	N/A
29	GCTGATGCTGGACATACACCTATATTATTGGAAGCTAGAGATGTTCTGGGAGGAAAGGTCTATATGTTAATTCATAATATATTTTTATATTCGATCATAAATTAGTTTATAT	GCTGATGCTGGACTTACACCTATATTATTGGAAGCTAGAGATGTTTTAGGAGGAAATGTC----------TTCATAATACATTTTTATATTTGATCATAAATTAGTTTATAT	102	1375	del	N/A
30	GCTGATGCTGGACATACACCTATATTATTGGAAGCTAGAGATGTTCTGGGAGGAAAGGTCTATATGTTAATTCATAATATATTTTTATATTCGATCATAAATTAGTTTATAT	GCTGATGCTGGACATACACCTATATTAGTGGAAGCTAGAGATGTTCTGGGAGGAAAGGTCTATATGTTAATTCATAATATATTTTTATATTCGATCATAAATTAGTTTATAT	112	1360	Sub	N/A
31	GCTGATGCTGGACATACACCTATATTATTGGAAGCTAGAGATGTTCTGGGAGGAAAGGTCTATATGTTAATTCATAATATATTTTTATATTCGATCATAAATTAGTTTATAT	GCTGAGGCTGGACATACACCTATATTATTGGAAGCTAGAGATGTTTTAGGAGGAAAGGTC----------TTCATAATATATTTTTATATTTGATCATAAATTAGTTTATAT	102	1324	del	N/A
32	GCTGATGCTGGACATACACCTATATTATTGGAAGCTAGAGATGTTCTGGGAGGAAAGGTCTATATGTTAATTCATAATATATTTTTATATTCGATCATAAATTAGTTTATAT	GCTGATGCTGGACATACACCTATATTATTGGAAGCTAGAGATGTTCTGGGAGGAAATGTC----------TTCATAATACATTTTTATATTTGATCATAAATTAGTTTATAT	102	1309	del	N/A
33	GCTGATGCTGGACATACACCTATATTATTGGAAGCTAGAGATGTTCTGGGAGGAAAGGTCTATATGTTAATTCATAATATATTTTTATATTCGATCATAAATTAGTTTATAT	GCTTATGCTGGACATACACCTATATTATTGGAAGCTAGAGATGTTCTGGGAGGAAAGGTCTATATGTTAATTCATAATATATTTTTATATTCGATCATAAATTAGTTTATAT	112	1264	Sub	N/A
34	GCTGATGCTGGACATACACCTATATTATTGGAAGCTAGAGATGTTCTGGGAGGAAAGGTCTATATGTTAATTCATAATATATTTTTATATTCGATCATAAATTAGTTTATAT	GCTGATGCTGGACATACACCTATATTATTGGAAGCTAGAGATGTTCGGGGAGGAAAGGTCTATATGTTAATTCATAATATATTTTTATATTCGATCATAAATTAGTTTATAT	112	1260	Sub	N/A
35	GCTGATGCTGGACATACACCTATATTATTGGAAGCTAGAGATGTTCTGGGAGGAAAGGTCTATATGTTAATTCATAATATATTTTTATATTCGATCATAAATTAGTTTATAT	GCTGATGCTGGACATACACCTATATTAGTGGAAGCTAGAGATGTTTTAGGAGGAAAGGTC----------TTCATAATATATTTTTATATTTGATCATAAATTAGTTTATAT	102	1249	del	N/A
36	GCTGATGCTGGACATACACCTATATTATTGGAAGCTAGAGATGTTCTGGGAGGAAAGGTCTATA---TGTTAATTCATAATATATTTTT--------ATATTCGATCATAAATTAGTTTATAT	GCTGATGCTGGACATACACCTATATTATTGGAAGCTAGAGATGTTCTGGGAGGAAAGGTCTATATACTGTT-ATTCATAATA---TTTTCGAACACAATATTTGATCATAAATTAGTTTATAT	119	1241	Ins	N/A
37	GCTGATGCTGGACATACACCTATATTATTGGAAGCTAGAGATGTTCTGGGAGGAAAGGTCTATATGTTAATTCATAATATATTTTTATATTCGATCATAAATTAGTTTATAT	GCTGATGCTGGACATACACCTATATGATTGGAAGCTAGAGATGTTTTAGGAGGAAAGGTC----------TTCATAATATATTTTTATATTTGATCATAAATTAGTTTATAT	102	1187	del	N/A
38	GCTGATGCTGGACATACACCTATATTATTGGAAGCTAGAGATGTTCTGGGAGGAAAGGTCTATATGTTAATTCATAATATATTTTTATATTCGATCATAAATTAGTTTATAT	GCTTATGCTGGACATACACCTATATTATTGGAAGCTAGAGATGTTTTAGGAGGAAAGGTC----------TTCATAATATATTTTTATATTTGATCATAAATTAGTTTATAT	102	1181	del	N/A
39	GCTGATGCTGGACATACACCTATATTATTGGAAGCTAGAGATGTTCTGGGAGGAAAGGTCTATATGTTAATTCATAATATATTTTTATATTCGATCATAAATTAGTTTATAT	GCTGATGCTGGACATACACCTATATTATTGGAAGCTAAAGATGTTCTAGGAGGAAAGGTCTATATGTTAGTTCATAATATATTTTTGTATTCGATCATAAATTAGTTTATAT	112	1172	Sub	N/A
40	GCTGATGCTGGACATACACCTATATTATTGGAAGCTAGAGATGTTCTGGGAGGAAAGGTCTATATGTTAATTCATAATATATTTTTATATTCGATCATAAATTAGTTTATAT	GCTGATGCTGGACATACACCTATATTATTGGAAGCGAGAGATGTTTTAGGAGGAAATGTC----------TTCATAATACATTTTTATATTTGATCATAAATTAGTTTATAT	102	1148	del	N/A
41	GCTGATGCTGGACATACACCTATATTATTGGAAGCTAGAGATGTTCTGGGAGGAAAGGTCTATATGTTAATTCATAATATATTTTTATATTCGATCATAAATTAGTTTATAT	GCTGAGGCTGGACATACACCTATATTATTGGAAGCTAGAGATGTTTTAGGAGGAAATGTC----------TTCATAATACATTTTTATATTTGATCATAAATTAGTTTATAT	102	1127	del	N/A
42	GCTGATGCTGGACATACACCTATATTATTGGAAGCTAGAGATGTTCTGGGAGGAAAGGTCTATATGTTAATTCATAATATATTTTTATATTCGATCATAAATTAGTTTATAT	GCTGATGCTGGACATACACCTATACTATTGGAAGCTAGAGATGTTTTAGGAGGAAATGTC----------TTCATAATACATTTTTATATTTGATCATAAATTAGTTTATAT	102	1122	del	N/A
43	GCTGATGCTGGACATACACCTATATTATTGGAAGCTAGAGATGTTCTGGGAGGAAAGGTCTATATGTTAATTCATAATATATTTTTATATTCGATCATAAATTAGTTTATAT	GCTGATGCTGGACATACACCTATATTAGTGGAAGCTAGAGATGTTTTAGGAGGAAATGTC----------TTCATAATACATTTTTATATTTGATCATAAATTAGTTTATAT	102	1097	del	N/A
44	GCTGATGCTGGACATACACCTATATTATTGGAAGCTAGAGATGTTCTGGGAGGAAAGGTCTATATGTTAATTCATAATATATTTTTATATTCGATCATAAATTAGTTTATAT	GCGGATGCTGGACATACACCTATATTATTGGAAGCTAGAGATGTTTTAGGAGGAAAGGTC----------TTCATAATATATTTTTATATTTGATCATAAATTAGTTTATAT	102	1088	del	N/A
45	GCTGATGCTGGACATACACCTATATTATTGGAAGCTAGAGATGTTCTGGGAGGAAAGGTCTATATGTTAATTCATAATATATTTTTATATTCGATCATAAATTAGTTTATAT	GCTAATGCTGGACATACACCTATATTATTGGAAGCTAGAGATGTTCTGGGAGGAAAGGTCTATATGTTAATTCATAATATATTTTTATATTCGATCATAAATTAGTTTATAT	112	1025	Sub	N/A
46	GCTGATGCTGGACATACACCTATATTATTGGAAGCTAGAGATGTTCTGGGAGGAAAGGTCTATATGTTAATTCATAATATATTTTTATATTCGATCATAAATTAGTTTATAT	GCGGATGCTGGACATACACCTATATTATTGGAAGCTAGAGATGTTCTGGGAGGAAAGGTCTATATGTTAATTCATAATATATTTTTATATTCGATCATAAATTAGTTTATAT	112	1024	Sub	N/A
47	GCTGATGCTGGACATACACCTATATTATTGGAAGCTAGAGATGTTCTGGGAGGAAAGGTCTATATGTTAATTCATAATATATTTTTATATTCGATCATAAATTAGTTTATAT	GCTTATGCTGGACATACACCTATATTATTGGAAGCTAGAGATGTTTTAGGAGGAAATGTC----------TTCATAATACATTTTTATATTTGATCATAAATTAGTTTATAT	102	1012	del	N/A
48	GCTGATGCTGGACATACACCTATATTATTGGAAGCTAGAGATGTTCTGGGAGGAAAGGTCTATATGTTAATTCATAATATATTTTTATATTCGATCATAAATTAGTTTATAT	GCTGATGCTGGGCATACACCTATATTATTGGAAGCTAGAGATGTTCTGGGAGGAAAGGTCTATATGTTAATTCATAATATATTTTTATATTCGATCATAAATTAGTTTATAT	112	996	Sub	N/A
49	GCTGATGCTGGACATACACCTATATTATTGGAAGCTAGAGATGTTCTGGGAGGAAAGGTCTATATGTTAATTCATAATATATTTTTATATTCGATCATAAATTAGTTTATAT	GCGGATGCTGGACATACACCTATATTATTGGAAGCTAGAGATGTTTTAGGAGGAAATGTC----------TTCATAATACATTTTTATATTTGATCATAAATTAGTTTATAT	102	982	del	N/A
50	GCTGATGCTGGACATACACCTATATTATTGGAAGCTAGAGATGTTCTGGGAGGAAAGGTCTATATGTTAATTCATAATATATTTTTATATTCGATCATAAATTAGTTTATAT	GCTGATGCTGGACATACACCTATATGATTGGAAGCTAGAGATGTTTTAGGAGGAAATGTC----------TTCATAATACATTTTTATATTTGATCATAAATTAGTTTATAT	102	975	del	N/A
51	GCTGATGCTGGACATACACCTATATTATTGGAAGCTAGAGATGTTCTGGGAGGAAAGGTCTATATGTTAATTCATAATATATTTTTATATTCGATCATAAATTAGTTTATAT	GCTGATGCTGGACATACACCTATATTATTGGTAGTTAGAGATGTTTTAAGAGGAAAGGTC----------TTCATAATATATTTTTATATTTGATCATAAATTAGTTTATAT	102	953	del	N/A
52	GCTGATGCTGGACATACACCTATATTATTGGAAGCTAGAGATGTTCTGGGAGGAAAGGTCTATATGTTAATTCATAATATATTTTTATATTCGATCATAAATTAGTTTATAT	GCTGATGCTGGACATACACCTATATTATTGGAAGCTAGAGATGTTTTAGGAGGAAATGTCTATATGTTAATTCATAATATATTTTTATATTCGATCATAAATTAGTTTATAT	112	910	Sub	N/A
53	GCTGATGCTGGACATACACCTATATTATTGGAAGCTAGAGATGTTCTGGGAGGAAAGGTCTATATGTTAATTCATAATATATTTTTATATTCGATCATAAATTAGTTTATAT	GCTGATGCTGGACATACACCTATATTATTGGAAGCGAGAGATGTTCTGGGAGGAAAGGTCTATATGTTAATTCATAATATATTTTTATATTCGATCATAAATTAGTTTATAT	112	871	Sub	N/A
54	GCTGATGCTGGACATACACCTATATTATTGGAAGCTAGAGATGTTCTGGGAGGAAAGGTCTATATGTTAATTCATAATATATTTTTATATTCGATCATAAATTAGTTTATAT	GCTGATGCTGGACATACACCTATATTATTGGAAGCTAGAGATGTTCTGGGAGGAAAGGTC----------TTCATAATACATTTTTATATTTGATCATAAATTAGTTTATAT	102	857	del	N/A
55	GCTGATGCTGGACATACACCTATATTATTGGAAGCTAGAGATGTTCTGGGAGGAAAGGTCTATATGTTAATTCATAATATATTTTTATATTCGATCATAAATTAGTTTATAT	GCTGATGCTGGACATACACCTATATTATTGGAAGCTAGAGATGTTCAGGGAGGAAAGGTCTATATGTTAATTCATAATATATTTTTATATTCGATCATAAATTAGTTTATAT	112	854	Sub	N/A
56	GCTGATGCTGGACATACACCTATATTATTGGAAGCTAGAGATGTTCTGGGAGGAAAGGTCTATATGTTAATTCATAATATATTTTTATATTCGATCATAAATTAGTTTATAT	GCTGATGCTGGATATACACCTATATTATTGGAAGCTAGAGATGTTCTGGGAGGAAAGGTCTATATGTTAATTCATAATATATTTTTATATTCGATCATAAATTAGTTTATAT	112	815	Sub	N/A
57	GCTGATGCTGGACATACACCTATATTATTGGAAGCTAGAGATGTTCTGGGAGGAAAGGTCTATATGTTAATTCATAATATATTTTTATATTCGATCATAAATTAGTTTATAT	GCTAATGCTGGACATACACCTATATTATTGGAAGCTAGAGATGTTTTAGGAGGAAAGGTC----------TTCATAATATATTTTTATATTTGATCATAAATTAGTTTATAT	102	811	del	N/A
58	GCTGATGCTGGACATACACCTATATTATTGGAAGCTAGAGATGTTCTGGGAGGAAAGGTCTATATGTTAATTCATAATATATTTTTATATTCGATCATAAATTAGTTTATAT	GCTGATGCTGGGCATACACCTATATTATTGGAAGCTAGAGATGTTTTAGGAGGAAAGGTC----------TTCATAATATATTTTTATATTTGATCATAAATTAGTTTATAT	102	796	del	N/A
59	GCTGATGCTGGACATACACCTATATTATTGGAAGCTAGAGATGTTCTGGGAGGAAAGGTCTATATGTTAATTCATAATATATTTTTATATTCGATCATAAATTAGTTTATAT	GCTGATGCTGGACATACACCTATATTATTGGCAGCTAGAGATGTTCTGGGAGGAAAGGTCTATATGTTAATTCATAATATATTTTTATATTCGATCATAAATTAGTTTATAT	112	763	Sub	N/A
60	GCTGATGCTGGACATACACCTATATTATTGGAAGCTAGAGATGTTCTGGGAGGAAAGGTCTATATGTTAATTCATAATATATTTTTATATTCGATCATAAATTAGTTTATAT	GCTGATGCTGGACATACACCTATATTATTGGAAGCTAGAGCTGTTCTGGGAGGAAAGGTCTATATGTTAATTCATAATATATTTTTATATTCGATCATAAATTAGTTTATAT	112	756	Sub	N/A
61	GCTGATGCTGGACATACACCTATATTATTGGAAGCTAGAGATGTTCTGGGAGGAAAGGTCTATATGTTAATTCATAATATATTTTTATATTCGATCATAAATTAGTTTATAT	GCTAATGCTGGACATACACCTATATTATTGGAAGCTAGAGATGTTTTAGGAGGAAATGTC----------TTCATAATACATTTTTATATTTGATCATAAATTAGTTTATAT	102	756	del	N/A
62	GCTGATGCTGGACATACACCTATATTATTGGAAGCTAGAGATGTTCTGGGAGGAAAGGTCTATATGTTAATTCATAATATATTTTTATATTCGATCATAAATTAGTTTATAT	GCTGATGCTGGACATACACCTATATTATTGGAAGCGAGAGATGTTTTAGGAGGAAAGGTC----------TTCATAATATATTTTTATATTTGATCATAAATTAGTTTATAT	102	741	del	N/A
63	GCTGATGCTGGACATACACCTATATTATTGGAAGCTAGAGATGTTCTGGGAGGAAAGGTCTATATGTTAATTCATAATATATTTTTATATTCGATCATAAATTAGTTTATAT	GCTGATGCTGGACATACACCTATATTATTGGCAGCTAGAGATGTTTTAGGAGGAAAGGTC----------TTCATAATATATTTTTATATTTGATCATAAATTAGTTTATAT	102	732	del	N/A
64	GCTGATGCTGGACATACACCTATATTATTGGAAGCTAGAGATGTTCTGGGAGGAAAGGTCTATATGTTAATTCATAATATATTTTTATATTCGATCATAAATTAGTTTATAT	GGTGATGCTGGACATACACCTATATTATTGGAAGCTAGAGATGTTCTGGGAGGAAAGGTCTATATGTTAATTCATAATATATTTTTATATTCGATCATAAATTAGTTTATAT	112	728	Sub	N/A
65	GCTGATGCTGGACATACACCTATATTATTGGAAGCTAGAGATGTTCTGGGAGGAAAGGTCTATATGTTAATTCATAATATATTTTTATATTCGATCATAAATTAGTTTATAT	GCTGATGCTGGACATACACCTATATTATTGGAAGCTAGAGATGTTTTAGGAGGAAATGTC----------TTCATAATACATTTTTATATTCGATCATAAATTAGTTTATAT	102	719	del	N/A
66	GCTGATGCTGGACATACACCTATATTATTGGAAGCTAGAGATGTTCTGGGAGGAAAGGTCTATATGTTAATTCATAATATATTTTTATATTCGATCATAAATTAGTTTATAT	GCTGATGCTGGATATACACCTATATTATTGGAAGCTAGAGATGTTTTAGGAGGAAAGGTC----------TTCATAATATATTTTTATATTTGATCATAAATTAGTTTATAT	102	717	del	N/A
67	GCTGATGCTGGACATACACCTATATTATTGGAAGCTAGAGATGTTCTGGGAGGAAAGGTCTATATGTTAATTCATAATATATTTTTATATTCGATCATAAATTAGTTTATAT	GCTGATGCTGGACATACACCTATATTATTGGAAGCTAGAGATGTACTGGGAGGAAAGGTCTATATGTTAATTCATAATATATTTTTATATTCGATCATAAATTAGTTTATAT	112	706	Sub	N/A
68	GCTGATGCTGGACATACACCTATATTATTGGAAGCTAGAGATGTTCTGGGAGGAAAGGTCTATATGTTAATTCATAATATATTTTTATATTCGATCATAAATTAGTTTATAT	GCTGATGCTGGACATACACCTATATTATTGGAAGCTAGAGATGTGCTGGGAGGAAAGGTCTATATGTTAATTCATAATATATTTTTATATTCGATCATAAATTAGTTTATAT	112	695	Sub	N/A
69	GCTGATGCTGGACATACACCTATATTATTGGAAGCTAGAGATGTTCTGGGAGGAAAGGTCTATATGTTAATTCATAATATATTTTTATATTCGATCATAAATTAGTTTATAT	GCTCATGCTGGACATACACCTATATTATTGGAAGCTAGAGATGTTCTGGGAGGAAAGGTCTATATGTTAATTCATAATATATTTTTATATTCGATCATAAATTAGTTTATAT	112	691	Sub	N/A
70	GCTGATGCTGGACATACACCTATATTATTGGAAGCTAGAGATGTTCTGGGAGGAAAGGTCTATATGTTAATTCATAATATATTTTTATATTCGATCATAAATTAGTTTATAT	GCTGATGCTGGGCATACACCTATATTATTGGAAGCTAGAGATGTTTTAGGAGGAAATGTC----------TTCATAATACATTTTTATATTTGATCATAAATTAGTTTATAT	102	683	del	N/A
71	GCTGATGCTGGACATACACCTATATTATTGGAAGCTAGAGATGTTCTGGGAGGAAAGGTCTATATGTTAATTCATAATATATTTTTATATTCGATCATAAATTAGTTTATAT	GCTGATGCTGGCCATACACCTATATTATTGGAAGCTAGAGATGTTTTAGGAGGAAAGGTC----------TTCATAATATATTTTTATATTTGATCATAAATTAGTTTATAT	102	679	del	N/A
72	GCTGATGCTGGACATACACCTATATTATTGGAAGCTAGAGATGTTCTGGGAGGAAAGGTCTATATGTTAATTCATAATATATTTTTATATTCGATCATAAATTAGTTTATAT	GCTGATGCTGGCCATACACCTATATTATTGGAAGCTAGAGATGTTCTGGGAGGAAAGGTCTATATGTTAATTCATAATATATTTTTATATTCGATCATAAATTAGTTTATAT	112	648	Sub	N/A
73	GCTGATGCTGGACATACACCTATATTATTGGAAGCTAGAGATGTTCTGGGAGGAAAGGTCTATATGTTAATTCATAATATATTTTTATATTCGATCATAAATTAGTTTATAT	GCTGATGCTGGACATACACCTATATTATTGGACGCTAGAGATGTTCTGGGAGGAAAGGTCTATATGTTAATTCATAATATATTTTTATATTCGATCATAAATTAGTTTATAT	112	642	Sub	N/A
74	GCTGATGCTGGACATACACCTATATTATTGGAAGCTAGAGATGTTCTGGGAGGAAAGGTCTATATGTTAATTCATAATATATTTTTATATTCGATCATAAATTAGTTTATAT	GCTGATGCTGGATATACACCTATATTATTGGAAGCTAGAGATGTTTTAGGAGGAAATGTC----------TTCATAATACATTTTTATATTTGATCATAAATTAGTTTATAT	102	642	del	N/A
75	GCTGATGCTGGACATACACCTATATTATTGGAAGCTAGAGATGTTCTGGGAGGAAAGGTCTATATGTTAATTCATAATATATTTTTATATTCGATCATAAATTAGTTTATAT	GCTGATGCTGGACATACACCTATATTATTGGAAGCTAGAGATGTGTTAGGAGGAAAGGTC----------TTCATAATATATTTTTATATTTGATCATAAATTAGTTTATAT	102	630	del	N/A
76	GCTGATGCTGGACATACACCTATATTATTGGAAGCTAGAGATGTTCTGGGAGGAAAGGTCTATATGTTAATTCATAATATATTTTTATATTCGATCATAAATTAGTTTATAT	GCTGATGCTGGACATACACCTATATTATTGGCAGCTAGAGATGTTTTAGGAGGAAATGTC----------TTCATAATACATTTTTATATTTGATCATAAATTAGTTTATAT	102	626	del	N/A
77	GCTGATGCTGGACATACACCTATATTATTGGAAGCTAGAGATGTTCTGGGAGGAAAGGTCTATATGTTAATTCATAATATATTTTTATATTCGATCATAAATTAGTTTATAT	GCTGATGCTGGACATACACCTATATTATTGGACGCTAGAGATGTTTTAGGAGGAAAGGTC----------TTCATAATATATTTTTATATTTGATCATAAATTAGTTTATAT	102	623	del	N/A
78	GCTGATGCTGGACATACACCTATATTATTGGAAGCTAGAGATGTTCTGGGAGGAAAGGTCTATATGTTAATTCATAATATATTTTTATATTCGATCATAAATTAGTTTATAT	GCTGATGCGGGACATACACCTATATTATTGGAAGCTAGAGATGTTCTGGGAGGAAAGGTCTATATGTTAATTCATAATATATTTTTATATTCGATCATAAATTAGTTTATAT	112	613	Sub	N/A
79	GCTGATGCTGGACATACACCTATATTATTGGAAGCTAGAGATGTTCTGGGAGGAAAGGTCTATATGTTAATTCATAATATATTTTTATATTCGATCATAAATTAGTTTATAT	GCTGATGCTGGACATACACCTATATTATTGGAATCTAGAGATGTTCTGGGAGGAAAGGTCTATATGTTAATTCATAATATATTTTTATATTCGATCATAAATTAGTTTATAT	112	594	Sub	N/A
80	GCTGATGCTGGACATACACCTATATTATTGGAAGCTAGAGATGTTCTGGGAGGAAAGGTCTATATGTTAATTCATAATATATTTTTATATTCGATCATAAATTAGTTTATAT	GCTCATGCTGGACATACACCTATATTATTGGAAGCTAGAGATGTTTTAGGAGGAAAGGTC----------TTCATAATATATTTTTATATTTGATCATAAATTAGTTTATAT	102	582	del	N/A
81	GCTGATGCTGGACATACACCTATATTATTGGAAGCTAGAGATGTTCTGGGAGGAAAGGTCTATATGTTAATTCATAATATATTTTTATATTCGATCATAAATTAGTTTATAT	GCTGATGCTGGACATACACCTATATTATTGGAAGCTAGCGATGTTCTGGGAGGAAAGGTCTATATGTTAATTCATAATATATTTTTATATTCGATCATAAATTAGTTTATAT	112	567	Sub	N/A
82	GCTGATGCTGGACATACACCTATATTATTGGAAGCTAGAGATGTTCTGGGAGGAAAGGTCTATATGTTAATTCATAATATATTTTTATATTCGATCATAAATTAGTTTATAT	GCTGATGCTGGACATACACCTATATTATTGGAAGATAGAGATGTTCTGGGAGGAAAGGTCTATATGTTAATTCATAATATATTTTTATATTCGATCATAAATTAGTTTATAT	112	567	Sub	N/A
83	GCTGATGCTGGACATACACCTATATTATTGGAAGCTAGAGATGTTCTGGGAGGAAAGGTCTATATGTTAATTCATAATATATTTTTATATTCGATCATAAATTAGTTTATAT	GGTGATGCTGGACATACACCTATATTATTGGAAGCTAGAGATGTTTTAGGAGGAAAGGTC----------TTCATAATATATTTTTATATTTGATCATAAATTAGTTTATAT	102	562	del	N/A
84	GCTGATGCTGGACATACACCTATATTATTGGAAGCTAGAGATGTTCTGGGAGGAAAGGTCTATATGTTAATTCATAATATATTTTTATATTCGATCATAAATTAGTTTATAT	GCTGATGCTGGACATACACCTATATTATTGGAAGCTAGAGATGTTTTAGGAGGAAATGTC----------TTCATAATATATTTTTATATTCGATCATAAATTAGTTTATAT	102	558	del	N/A
85	GCTGATGCTGGACATACACCTATATTATTGGAAGCTAGAGATGTTCTGGGAGGAAAGGTCTATATGTTAATTCATAATATATTTTTATATTCGATCATAAATTAGTTTATAT	GCTGATGCTGGCCATACACCTATATTATTGGAAGCTAGAGATGTTTTAGGAGGAAATGTC----------TTCATAATACATTTTTATATTTGATCATAAATTAGTTTATAT	102	554	del	N/A
86	GCTGATGCTGGACATACACCTATATTATTGGAAGCTAGAGATGTTCTGGGAGGAAAGGTCTATATGTTAATTCATAATATATTTTTATATTCGATCATAAATTAGTTTATAT	GCTGATGCTGGACATACACCTATATTATTGGAGGCTAGAGATGTTCTGGGAGGAAAGGTCTATATGTTAATTCATAATATATTTTTATATTCGATCATAAATTAGTTTATAT	112	553	Sub	N/A
87	GCTGATGCTGGACATACACCTATATTATTGGAAGCTAGAGATGTTCTGGGAGGAAAGGTCTATATGTTAATTCATAATATATTTTTATATTCGATCATAAATTAGTTTATAT	GCTGATGCTGGACATACACCTATATTATTGGACGCTAGAGATGTTTTAGGAGGAAATGTC----------TTCATAATACATTTTTATATTTGATCATAAATTAGTTTATAT	102	547	del	N/A
88	GCTGATGCTGGACATACACCTATATTATTGGAAGCTAGAGATGTTCTGGGAGGAAAGGTCTATATGTTAATTCATAATATATTTTTATATTCGATCATAAATTAGTTTATAT	GTTGATGCTGGACATACACCTATATTATTGGAAGCTAGAGATGTTCTGGGAGGAAAGGTCTATATGTTAATTCATAATATATTTTTATATTCGATCATAAATTAGTTTATAT	112	543	Sub	N/A
89	GCTGATGCTGGACATACACCTATATTATTGGAAGCTAGAGATGTTCTGGGAGGAAAGGTCTATATGTTAATTCATAATATATTTTTATATTCGATCATAAATTAGTTTATAT	GCTGATGCTGGACATACACCTATATTATTGGAAGCTAGAGATGGTTTAGGAGGAAAGGTC----------TTCATAATATATTTTTATATTTGATCATAAATTAGTTTATAT	102	529	del	N/A
90	GCTGATGCTGGACATACACCTATATTATTGGAAGCTAGAGATGTTCTGGGAGGAAAGGTCTATATGTTAATTCATAATATATTTTTATATTCGATCATAAATTAGTTTATAT	GCTGATGCTGGTCATACACCTATATTATTGGAAGCTAGAGATGTTCTGGGAGGAAAGGTCTATATGTTAATTCATAATATATTTTTATATTCGATCATAAATTAGTTTATAT	112	514	Sub	N/A
91	GCTGATGCTGGACATACACCTATATTATTGGAAGCTAGAGATGTTCTGGGAGGAAAGGTCTATATGTTAATTCATAATATATTTTTATATTCGATCATAAATTAGTTTATAT	GGTGATGCTGGACATACACCTATATTATTGGAAGCTAGAGATGTTTTAGGAGGAAATGTC----------TTCATAATACATTTTTATATTTGATCATAAATTAGTTTATAT	102	510	del	N/A
92	GCTGATGCTGGACATACACCTATATTATTGGAAGCTAGAGATGTTCTGGGAGGAAAGGTCTATATGTTAATTCATAATATATTTTTATATTCGATCATAAATTAGTTTATAT	GCTGATGCTGGACATACACCTATATTATTGGAAGCTAGAGATGTTTTGGGAGGAAAGGTCTATATGTTAATTCATAATATATTTTTATATTCGATCATAAATTAGTTTATAT	112	494	Sub	N/A
93	GCTGATGCTGGACATACACCTATATTATTGGAAGCTAGAGATGTTCTGGGAGGAAAGGTCTATATGTTAATTCATAATATATTTTTATATTCGATCATAAATTAGTTTATAT	GCTGATTCTGGACATACACCTATATTATTGGAAGCTAGAGATGTTCTGGGAGGAAAGGTCTATATGTTAATTCATAATATATTTTTATATTCGATCATAAATTAGTTTATAT	112	491	Sub	N/A
94	GCTGATGCTGGACATACACCTATATTATTGGAAGCTAGAGATGTTCTGGGAGGAAAGGTCTATATGTTAATTCATAATATATTTTTATATTCGATCATAAATTAGTTTATAT	GCTGATGCGGGACATACACCTATATTATTGGAAGCTAGAGATGTTTTAGGAGGAAAGGTC----------TTCATAATATATTTTTATATTTGATCATAAATTAGTTTATAT	102	485	del	N/A
95	GCTGATGCTGGACATACACCTATATTATTGGAAGCTAGAGATGTTCTGGGAGGAAAGGTCTATATGTTAATTCATAATATATTTTTATATTCGATCATAAATTAGTTTATAT	GCTGATGCTGGACATACACCTATATTACTGGAAGCTAGAGATGTTCTGGGAGGAAAGGTCTATATGTTAATTCATAATATATTTTTATATTCGATCATAAATTAGTTTATAT	112	474	Sub	N/A
96	GCTGATGCTGGACATACACCTATATTATTGGAAGCTAGAGATGTTCTGGGAGGAAAGGTCTATATGTTAATTCATAATATATTTTTATATTCGATCATAAATTAGTTTATAT	GCTGATGCGGGACATACACCTATATTATTGGAAGCTAGAGATGTTTTAGGAGGAAATGTC----------TTCATAATACATTTTTATATTTGATCATAAATTAGTTTATAT	102	452	del	N/A
97	GCTGATGCTGGACATACACCTATATTATTGGAAGCTAGAGATGTTCTGGGAGGAAAGGTCTATATGTTAATTCATAATATATTTTTATATTCGATCATAAATTAGTTTATAT	GCTCATGCTGGACATACACCTATATTATTGGAAGCTAGAGATGTTTTAGGAGGAAATGTC----------TTCATAATACATTTTTATATTTGATCATAAATTAGTTTATAT	102	452	del	N/A
98	GCTGATGCTGGACATACACCTATATTATTGGAAGCTAGAGATGTTCTGGGAGGAAAGGTCTATATGTTAATTCATAATATATTTTTATATTCGATCATAAATTAGTTTATAT	GCTGCTGCTGGACATACACCTATATTATTGGAAGCTAGAGATGTTCTGGGAGGAAAGGTCTATATGTTAATTCATAATATATTTTTATATTCGATCATAAATTAGTTTATAT	112	449	Sub	N/A
99	GCTGATGCTGGACATACACCTATATTATTGGAAGCTAGAGATGTTCTGGGAGGAAAGGTCTATATGTTAATTCATAATATATTTTTATATTCGATCATAAATTAGTTTATAT	GCTGATGCTGGACATACACCTATATTATTGGAAGCTAGAGATGTTCTGGGAGGAAAGGTCTATATGTTAATTCATAATATATTTTTATATTCGATCATTAATTAGTTTATAT	112	440	Sub	N/A
100	GCTGATGCTGGACATACACCTATATTATTGGAAGCTAGAGATGTTCTGGGAGGAAAGGTCTATATGTTAATTCATAATATATTTTTATATTCGATCATAAATTAGTTTATAT	GCTGATGCTGGACATACACCTATATTATTGGGAGCTAGAGATGTTCTGGGAGGAAAGGTCTATATGTTAATTCATAATATATTTTTATATTCGATCATAAATTAGTTTATAT	112	436	Sub	N/A
101	GCTGATGCTGGACATACACCTATATTATTGGAAGCTAGAGATGTTCTGGGAGGAAAGGTCTATATGTTAATTCATAATATATTTTTATATTCGATCATAAATTAGTTTATAT	GCTGATGCTGGACATACACCTATATTATTGGAGGCTAGAGATGTTTTAGGAGGAAAGGTC----------TTCATAATATATTTTTATATTTGATCATAAATTAGTTTATAT	102	434	del	N/A
102	GCTGATGCTGGACATACACCTATATTATTGGAAGCTAGAGATGTTCTGGGAGGAAAGGTCTATATGTTAATTCATAATATATTTTTATATTCGATCATAAATTAGTTTATAT	GCTGATGCTGGACATACACCTATATTATTGGAAGCTAGAGATGTTCCGGGAGGAAAGGTCTATATGTTAATTCATAATATATTTTTATATTCGATCATAAATTAGTTTATAT	112	421	Sub	N/A
103	GCTGATGCTGGACATACACCTATATTATTGGAAGCTAGAGATGTTCTGGGAGGAAAGGTCTATATGTTAATTCATAATATATTTTTATATTCGATCATAAATTAGTTTATAT	GCTGATGCTGGACATACACCTATCTTATTGGAAGCTAGAGATGTTCTGGGAGGAAAGGTCTATATGTTAATTCATAATATATTTTTATATTCGATCATAAATTAGTTTATAT	112	419	Sub	N/A
104	GCTGATGCTGGACATACACCTATATTATTGGAAGCTAGAGATGTTCTGGGAGGAAAGGTCTATATGTTAATTCATAATATATTTTTATATTCGATCATAAATTAGTTTATAT	GCTGATGCTGGTCATACACCTATATTATTGGAAGCTAGAGATGTTTTAGGAGGAAAGGTC----------TTCATAATATATTTTTATATTTGATCATAAATTAGTTTATAT	102	419	del	N/A
105	GCTGATGCTGGACATACACCTATATTATTGGAAGCTAGAGATGTTCTGGGAGGAAAGGTCTATATGTTAATTCATAATATATTTTT--------ATATTCGATCATAAATTAGTTTATAT	GCTGATGCTGGACATACACCTATATTATTGGAAGCTAGAGATGTTCTGGGAGGAAAGGTCTATATGTTAATTCATAATA---TTTTCGAACACAATATTTGATCATAAATTAGTTTATAT	117	417	Ins	N/A
106	GCTGATGCTGGACATACACCTATATTATTGGAAGCTAGAGATGTTCTGGGAGGAAAGGTCTATATGTTAATTCATAATATATTTTTATATTCGATCATAAATTAGTTTATAT	GCTGATGCTGGACATACACCTATATTATTGGAAGCTAGAGATGGTCTGGGAGGAAAGGTCTATATGTTAATTCATAATATATTTTTATATTCGATCATAAATTAGTTTATAT	112	413	Sub	N/A
107	GCTGATGCTGGACATACACCTATATTATTGGAAGCTAGAGATGTTCTGGGAGGAAAGGTCTATATGTTAATTCATAATATATTTTTATATTCGATCATAAATTAGTTTATAT	GTTGATGCTGGACATACACCTATATTATTGGAAGCTAGAGATGTTTTAGGAGGAAAGGTC----------TTCATAATATATTTTTATATTTGATCATAAATTAGTTTATAT	102	408	del	N/A
108	GCTGATGCTGGACATACACCTATATTATTGGAAGCTAGAGATGTTCTGGGAGGAAAGGTCTATATGTTAATTCATAATATATTTTTATATTCGATCATAAATTAGTTTATAT	GCTGATGCTGTACATACACCTATATTATTGGAAGCTAGAGATGTTCTGGGAGGAAAGGTCTATATGTTAATTCATAATATATTTTTATATTCGATCATAAATTAGTTTATAT	112	405	Sub	N/A
109	GCTGATGCTGGACATACACCTATATTATTGGAAGCTAGAGATGTTCTGGGAGGAAAGGTCTATA---TGTTAATTCATAATATATTTTTATATTCGATCATAAATTAGTTTATAT	GCTGATGCTGGACATACACCTATATTATTGGAAGCTAGAGATGTTCTGGGGGGAAAGGTCTATATACTGTT-ATTCATAATATATTTTTATATTCGATCATAAATTAGTTTATAT	114	398	Ins	N/A
110	GCTGATGCTGGACATACACCTATATTATTGGAAGCTAGAGATGTTCTGGGAGGAAAGGTCTATATGTTAATTCATAATATATTTTTATATTCGATCATAAATTAGTTTATAT	GCTGATGCTGGACATACACCTATATTACTGGAAGCTAGAGATGTTTTAGGAGGAAAGGTC----------TTCATAATATATTTTTATATTTGATCATAAATTAGTTTATAT	102	398	del	N/A
111	GCTGATGCTGGACATACACCTATATTATTGGAAGCTAGAGATGTTCTGGGAGGAAAGGTCTATATGTTAATTCATAATATATTTTTATATTCGATCATAAATTAGTTTATAT	GCTGATGCTGGACATACACCTATCTTATTGGAAGCTAGAGATGTTTTAGGAGGAAAGGTC----------TTCATAATATATTTTTATATTTGATCATAAATTAGTTTATAT	102	396	del	N/A
112	GCTGATGCTGGACATACACCTATATTATTGGAAGCTAGAGATGTTCTGGGAGGAAAGGTCTATATGTTAATTCATAATATATTTTTATATTCGATCATAAATTAGTTTATAT	GCTGATGCTGGACATACACCTATATTATTGGAATCTAGAGATGTTTTAGGAGGAAATGTC----------TTCATAATACATTTTTATATTTGATCATAAATTAGTTTATAT	102	394	del	N/A
113	GCTGATGCTGGACATACACCTATATTATTGGAAGCTAGAGATGTTCTGGGAGGAAAGGTCTATATGTTAATTCATAATATATTTTTATATTCGATCATAAATTAGTTTATAT	GCTGATGCTGGACATACACCTATATTATTTGAAGCTAGAGATGTTCTGGGAGGAAAGGTCTATATGTTAATTCATAATATATTTTTATATTCGATCATAAATTAGTTTATAT	112	393	Sub	N/A
114	GCTGATGCTGGACATACACCTATATTATTGGAAGCTAGAGATGTTCTGGGAGGAAAGGTCTATATGTTAATTCATAATATATTTTTATATTCGATCATAAATTAGTTTATAT	GCTGATGCTGGACATACACCTATATTATTGGAAGCTATAGATGTTCTGGGAGGAAAGGTCTATATGTTAATTCATAATATATTTTTATATTCGATCATAAATTAGTTTATAT	112	387	Sub	N/A
115	GCTGATGCTGGACATACACCTATATTATTGGAAGCTAGAGATGTTCTGGGAGGAAAGGTCTATATGTTAATTCATAATATATTTTTATATTCGATCATAAATTAGTTTATAT	GCTGATGCTGGACATACACCTATATTATTAGAAGCTAAAGATGTTCTATGAGGAAAGGTCTATATGTTAATTCATAATATATTTTTATATTCGATCATAAATTAGTTTATAT	112	386	Sub	N/A
116	GCTGATGCTGGACATACACCTATATTATTGGAAGCTAGAGATGTTCTGGGAGGAAAGGTCTATATGTTAATTCATAATATATTTTTATATTCGATCATAAATTAGTTTATAT	GCTGATGCTGGACATACACCTATATTATGGGAAGCTAGAGATGTTTTAGGAGGAAAGGTC----------TTCATAATATATTTTTATATTTGATCATAAATTAGTTTATAT	102	384	del	N/A
117	GCTGATGCTGGACATACACCTATATTATTGGAAGCTAGAGATGTTCTGGGAGGAAAGGTCTATATGTTAATTCATAATATATTTTTATATTCGATCATAAATTAGTTTATAT	GCTGATGCTGGACATACACCTATATTATTGGAAGCTAGAGATGTTCTGGGAGGAAAGGTCTATATGTTAATTCATAATATATTTTTATATTCGATAATAAATTAGTTTATAT	112	383	Sub	N/A
118	GCTGATGCTGGACATACACCTATATTATTGGAAGCTAGAGATGTTCTGGGAGGAAAGGTCTATATGTTAATTCATAATATATTTTTATATTCGATCATAAATTAGTTTATAT	GCTGATGCTGGACATACACCTATATTACTGGAAGCTAGAGATGTTTTAGGAGGAAATGTC----------TTCATAATACATTTTTATATTTGATCATAAATTAGTTTATAT	102	382	del	N/A
119	GCTGATGCTGGACATACACCTATATTATTGGAAGCTAGAGATGTTCTGGGAGGAAAGGTCTATATGTTAATTCATAATATATTTTTATATTCGATCATAAATTAGTTTATAT	GCTGATGCTGGACATACACCTATATTATTGGAAGCTAGAGATGTCCTGGGAGGAAAGGTCTATATGTTAATTCATAATATATTTTTATATTCGATCATAAATTAGTTTATAT	112	380	Sub	N/A
120	GCTGATGCTGGACATACACCTATATTATTGGAAGCTAGAGATGTTCTGGGAGGAAAGGTCTATATGTTAATTCATAATATATTTTTATATTCGATCATAAATTAGTTTATAT	GCTGATTCTGGACATACACCTATATTATTGGAAGCTAGAGATGTTTTAGGAGGAAATGTC----------TTCATAATACATTTTTATATTTGATCATAAATTAGTTTATAT	102	379	del	N/A
121	GCTGATGCTGGACATACACCTATATTATTGGAAGCTAGAGATGTTCTGGGAGGAAAGGTCTATATGTTAATTCATAATATATTTTTATATTCGATCATAAATTAGTTTATAT	GCTGATTCTGGACATACACCTATATTATTGGAAGCTAGAGATGTTTTAGGAGGAAAGGTC----------TTCATAATATATTTTTATATTTGATCATAAATTAGTTTATAT	102	376	del	N/A
122	GCTGATGCTGGACATACACCTATATTATTGGAAGCTAGAGATGTTCTGGGAGGAAAGGTCTATATGTTAATTCATAATATATTTTTATATTCGATCATAAATTAGTTTATAT	GTTGATGCTGGACATACACCTATATTATTGGAAGCTAGAGATGTTTTAGGAGGAAATGTC----------TTCATAATACATTTTTATATTTGATCATAAATTAGTTTATAT	102	375	del	N/A
123	GCTGATGCTGGACATACACCTATATTATTGGAAGCTAGAGATGTTCTGGGAGGAAAGGTCTATATGTTAATTCATAATATATTTTTATATTCGATCATAAATTAGTTTATAT	GCTGATGCTGGACATACACCTATATTCTTGGAAGCTAGAGATGTTCTGGGAGGAAAGGTCTATATGTTAATTCATAATATATTTTTATATTCGATCATAAATTAGTTTATAT	112	373	Sub	N/A
124	GCTGATGCTGGACATACACCTATATTATTGGAAGCTAGAGATGTTCTGGGAGGAAAGGTCTATATGTTAATTCATAATATATTTTTATATTCGATCATAAATTAGTTTATAT	GCTGATGCTGTACATACACCTATATTATTGGAAGCTAGAGATGTTTTAGGAGGAAAGGTC----------TTCATAATATATTTTTATATTTGATCATAAATTAGTTTATAT	102	359	del	N/A
125	GCTGATGCTGGACATACACCTATATTATTGGAAGCTAGAGATGTTCTGGGAGGAAAGGTCTATATGTTAATTCATAATATATTTTTATATTCGATCATAAATTAGTTTATAT	GCTGATGCTGGACATACACCTATATTATTGGAGGCTAGAGATGTTTTAGGAGGAAATGTC----------TTCATAATACATTTTTATATTTGATCATAAATTAGTTTATAT	102	359	del	N/A
126	GCTGATGCTGGACATACACCTATATTATTGGAAGCTAGAGATGTTCTGGGAGGAAAGGTCTATATGTTAATTCATAATATATTTTTATATTCGATCATAAATTAGTTTATAT	GCTGATGCTGGACATACACCTATATTATGGGAAGCTAGAGATGTTTTAGGAGGAAATGTC----------TTCATAATACATTTTTATATTTGATCATAAATTAGTTTATAT	102	358	del	N/A
127	GCTGATGCTGGACATACACCTATATTATTGGAAGCTAGAGATGTTCTGGGAGGAAAGGTCTATATGTTAATTCATAATATATTTTTATATTCGATCATAAATTAGTTTATAT	GCTGCTGCTGGACATACACCTATATTATTGGAAGCTAGAGATGTTTTAGGAGGAAAGGTC----------TTCATAATATATTTTTATATTTGATCATAAATTAGTTTATAT	102	355	del	N/A
128	GCTGATGCTGGACATACACCTATATTATTGGAAGCTAGAGATGTTCTGGGAGGAAAGGTCTATATGTTAATTCATAATATATTTTTATATTCGATCATAAATTAGTTTATAT	GCTGATGCTGGACATACACCTATATTATTTGAAGCTAGAGATGTTTTAGGAGGAAAGGTC----------TTCATAATATATTTTTATATTTGATCATAAATTAGTTTATAT	102	351	del	N/A
129	GCTGATGCTGGACATACACCTATATTATTGGAAGCTAGAGATGTTCTGGGAGGAAAGGTCTATATGTTAATTCATAATATATTTTTATATTCGATCATAAATTAGTTTATAT	GCTGATGCTGGACATACACCTATATTATTGGAAGATAGAGATGTTTTAGGAGGAAATGTC----------TTCATAATACATTTTTATATTTGATCATAAATTAGTTTATAT	102	348	del	N/A
130	GCTGATGCTGGACATACACCTATATTATTGGAAGCTAGAGATGTTCTGGGAGGAAAGGTCTATATGTTAATTCATAATATATTTTTATATTCGATCATAAATTAGTTTATAT	GCTGATGCTGGACATACACCTATATTATTGGAAGCTAGGGATGTTCTGGGAGGAAAGGTCTATATGTTAATTCATAATATATTTTTATATTCGATCATAAATTAGTTTATAT	112	342	Sub	N/A
131	GCTGATGCTGGACATACACCTATATTATTGGAAGCTAGAGATGTTCTGGGAGGAAAGGTCTATATGTTAATTCATAATATATTTTTATATTCGATCATAAATTAGTTTATAT	GCTGATGCTGGTCATACACCTATATTATTGGAAGCTAGAGATGTTTTAGGAGGAAATGTC----------TTCATAATACATTTTTATATTTGATCATAAATTAGTTTATAT	102	334	del	N/A
132	GCTGATGCTGGACATACACCTATATTATTGGAAGCTAGAGATGTTCTGGGAGGAAAGGTCTATATGTTAATTCATAATATATTTTTATATTCGATCATAAATTAGTTTATAT	GCTGATGCTGGACATACACCTATATTATTGGAAGCTAGAGATGTTCTGGGAGGAAAGGTCTATATGTTAATTCATAATATATTTTTATATTCGATCATGAATTAGTTTATAT	112	333	Sub	N/A
133	GCTGATGCTGGACATACACCTATATTATTGGAAGCTAGAGATGTTCTGGGAGGAAAGGTCTATATGTTAATTCATAATATATTTTTATA-TTCGATCATAAATTAGTTTATAT	GCTGATGCTGGACATACACCTATATTATTGGAAGCTAGAGATGTTTTAGGAGGAAATGTC----------TTCATAATATATTTTTATATTTTGATCATAAATTAGTTTATAT	103	333	del	N/A
134	GCTGATGCTGGACATACACCTATATTATTGGAAGCTAGAGATGTTCTGGGAGGAAAGGTCTATATGTTAATTCATAATATATTTTTATATTCGATCATAAATTAGTTTATAT	GCTGATGCTGGACATACACCTATATTATTGGAAGCTAGAGATGTTCTGGGAGGAAAGGTCTATATGTTAATTCATAATATATTTTTATATTCAATCATAAATTAGTTTATAT	112	329	Sub	N/A
135	GCTGATGCTGGACATACACCTATATTATTGGAAGCTAGAGATGTTCTGGGAGGAAAGGTCTATATGTTAATTCATAATATATTTTTATATTCGATCATAAATTAGTTTATAT	GCTGATGCTGGACATACACCTATATTATTGGGAGCTAGAGATGTTTTAGGAGGAAAGGTC----------TTCATAATATATTTTTATATTTGATCATAAATTAGTTTATAT	102	327	del	N/A
136	GCTGATGCTGGACATACACCTATATTATTGGAAGCTAGAGATGTTCTGGGAGGAAAGGTCTATATGTTAATTCATAATATATTTTTATATTCGATCATAAATTAGTTTATAT	GCTGATGCTGGACATACACCTATATCATTGGAAGCTAGAGATGTTCTGGGAGGAAAGGTCTATATGTTAATTCATAATATATTTTTATATTCGATCATAAATTAGTTTATAT	112	327	Sub	N/A
137	GCTGATGCTGGACATACACCTATATTATTGGAAGCTAGAGATGTTCTGGGAGGAAAGGTCTATATGTTAATTCATAATATATTTTTATATTCGATCATAAATTAGTTTATAT	GCTGATGCTGGACATACACCTATATTATTGGAAACTAGAGATGTTCTGGGAGGAAAGGTCTATATGTTAATTCATAATATATTTTTATATTCGATCATAAATTAGTTTATAT	112	325	Sub	N/A
138	GCTGATGCTGGACATACACCTATATTATTGGAAGCTAGAGATGTTCTGGGAGGAAAGGTCTATATGTTAATTCATAATATATTTTTATATTCGATCATAAATTAGTTTATAT	GCTGATGCTGGACATACACCTATATTATTGGAAGCTAGAGATGTTCTGGGAGGAAAGGTCTATATGTTAATTCATAATATATTTTTATATTCGATTATAAATTAGTTTATAT	112	323	Sub	N/A
139	GCTGATGCTGGACATACACCTATATTATTGGAAGCTAGAGATGTTCTGGGAGGAAAGGTCTATATGTTAATTCATAATATATTTTTATATTCGATCATAAATTAGTTTATAT	GCTGATGCTGGACATACACCTATATTCTTGGAAGCTAGAGATGTTTTAGGAGGAAAGGTC----------TTCATAATATATTTTTATATTTGATCATAAATTAGTTTATAT	102	320	del	N/A
140	GCTGATGCTGGACATACACCTATATTATTGGAAGCTAGAGATGTTCTGGGAGGAAAGGTCTATATGTTAATTCATAATATATTTTTATATTCGATCATAAATTAGTTTATAT	GCTGATGCTGGACATACACCTATATTATTGGAAGCTAGATATGTTCTGGGAGGAAAGGTCTATATGTTAATTCATAATATATTTTTATATTCGATCATAAATTAGTTTATAT	112	319	Sub	N/A
141	GCTGATGCTGGACATACACCTATATTATTGGAAGCTAGAGATGTTCTGGGAGGAAAGGTCTATATGTTAATTCATAATATATTTTTATATTCGATCATAAATTAGTTTATAT	GCTGATGCTGGACATACACCTATATTATTGGAAGCCAGAGATGTTCTGGGAGGAAAGGTCTATATGTTAATTCATAATATATTTTTATATTCGATCATAAATTAGTTTATAT	112	319	Sub	N/A
142	GCTGATGCTGGACATACACCTATATTATTGGAAGCTAGAGATGTTCTGGGAGGAAAGGTCTATATGTTAATTCATAATATATTTTTATATTCGATCATAAATTAGTTTATAT	GCTGATGCTGGACATACACCTATATTATTAGAAGCTAGAGATGTTCTGGGAGGAAAGGTCTATATGTTAATTCATAATATATTTTTATATTCGATCATAAATTAGTTTATAT	112	317	Sub	N/A
143	#NAME?	GCTGATGCTGGACATACACCGCTGATGCTGGACATACACCGCTGATGCTGGACATACACCTATATTATTGGAAGCTAGAGATGTTCTGGGAGGAAAGGTCTATATGTTAATTCATAATATATTTTTATATTCGATCATAAATTAGTTTATAT	152	313	Ins	N/A
144	GCTGATGCTGGACATACACCTATATTATTGGAAGCTAGAGATGTTCTGGGAGGAAAGGTCTATATGTTAATTCATAATATATTTTTATATTCGATCATAAATTAGTTTATAT	GCTGATGCTGGACATACACCTATATTATTGGAAGCTAGAGATGTTCTGGGAGGAAAGGTCTATATGTTAATTCATAATATATTTTTATATTCGATCATAGATTAGTTTATAT	112	313	Sub	N/A
145	GCTGATGCTGGACATACACCTATATTATTGGAAGCTAGAGATGTTCTGGGAGGAAAGGTCTATATGTTAATTCATAATATATTTTTATATTCGATCATAAATTAGTTTATAT	GCTGATGCTGGACCTACACCTATATTATTGGAAGCTAGAGATGTTCTGGGAGGAAAGGTCTATATGTTAATTCATAATATATTTTTATATTCGATCATAAATTAGTTTATAT	112	313	Sub	N/A
146	GCTGATGCTGGACATACACCTATATTATTGGAAGCTAGAGATGTTCTGGGAGGAAAGGTCTATATGTTAATTCATAATATATTTTTATATTCGATCATAAATTAGTTTATAT	GCTGATGCTGGACATACACCTATATTATTGGAAGCTAGAGATGTTTTAGGAGGGAATGTC----------TTCATAATACATTTTTATATTTGATCATAAATTAGTTTATAT	102	311	del	N/A
147	GCTGATGCTGGACATACACCTATATTATTGGAAGCTAGAGATGTTCTGGGAGGAAAGGTCTATATGTTAATTCATAATATATTTTTATATTCGATCATAAATTAGTTTATAT	GCTGATGCTGGACATACACCTATATTAATGGAAGCTAGAGATGTTCTGGGAGGAAAGGTCTATATGTTAATTCATAATATATTTTTATATTCGATCATAAATTAGTTTATAT	112	311	Sub	N/A
148	GCTGATGCTGGACATACACCTATATTATTGGAAGCTAGAGATGTTCTGGGAGGAAAGGTCTATATGTTAATTCATAATATATTTTTATATTCGATCATAAATTAGTTTATAT	GCTGATGCTGGACATACACCTATCTTATTGGAAGCTAGAGATGTTTTAGGAGGAAATGTC----------TTCATAATACATTTTTATATTTGATCATAAATTAGTTTATAT	102	310	del	N/A
149	GCTGATGCTGGACATACACCTATATTATTGGAAGCTAGAGATGTTCTGGGAGGAAAGGTCTATATGTTAATTCATAATATATTTTTATATTCGATCATAAATTAGTTTATAT	GCTGATGCTGGACATACACCTATATTATTGGAAGCTAGAGGTGTTCTGGGAGGAAAGGTCTATATGTTAATTCATAATATATTTTTATATTCGATCATAAATTAGTTTATAT	112	309	Sub	N/A
150	GCTGATGCTGGACATACACCTATATTATTGGAAGCTAGAGATGTTCTGGGAGGAAAGGTCTATATGTTAATTCATAATATATTTTTATATTCGATCATAAATTAGTTTATAT	GCTGATGCTGGACATACACCTATATTATTGGAAGCTAGAGATGTTCTGGGAGGAAAGGTCTATATGTTAATTTATAATATATTTTTATATTCGATCATAAATTAGTTTATAT	112	305	Sub	N/A
151	GCTGATGCTGGACATACACCTATATTATTGGAAGCTAGAGATGTTCTGGGAGGAAAGGTCTATATGTTAATTCATAATATATTTTTATATTCGATCATAAATTAGTTTATAT	GATGATGCTGGACATACACCTATATTATTGGAAGCTAGAGATGTTCTGGGAGGAAAGGTCTATATGTTAATTCATAATATATTTTTATATTCGATCATAAATTAGTTTATAT	112	305	Sub	N/A
152	GCTGATGCTGGACATACACCTATATTATTGGAAGCTAGAGATGTTCTGGGAGGAAAGGTCTATATGTTAATTCATAATATATTTTTATATTCGATCATAAATTAGTTTATAT	GCTGATGCTGTACATACACCTATATTATTGGAAGCTAGAGATGTTTTAGGAGGAAATGTC----------TTCATAATACATTTTTATATTTGATCATAAATTAGTTTATAT	102	304	del	N/A
153	GCTGATGCTGGACATACACCTATATTATTGGAAGCTAGAGATGTTCTGGGAGGAAAGGTCTATATGTTAATTCATAATATATTTTTATATTCGATCATAAATTAGTTTATAT	GCTGATGCTGGACATACACCTATATTATTGGAAGCTAGAGATGTTATGGGAGGAAAGGTCTATATGTTAATTCATAATATATTTTTATATTCGATCATAAATTAGTTTATAT	112	300	Sub	N/A
154	GCTGATGCTGGACATACACCTATATTATTGGAAGCTAGAGATGTTCTGGGAGGAAAGGTCTATATGTTAATTCATAATATATTTTTATATTCGATCATAAATTAGTTTATAT	GCTGATGCTGGACATACACCTATATTATTGGAAGCTAGAGATGTTTTAGGAGGAAATGTC----------TTTATAATACATTTTTATATTTGATCATAAATTAGTTTATAT	102	298	del	N/A
155	GCTGATGCTGGACATACACCTATATTATTGGAAGCTAGAGATGTTCTGGGAGGAAAGGTCTATATGTTAATTCATAATATATTTTTATATTCGATCATAAATTAGTTTATAT	GCTGATGCTGGACATACACCTATGTTATTGGAAGCTAGAGATGTTCTGGGAGGAAAGGTCTATATGTTAATTCATAATATATTTTTATATTCGATCATAAATTAGTTTATAT	112	295	Sub	N/A
156	GCTGATGCTGGACATACACCTATATTATTGGAAGCTAGAGATGTTCTGGGAGGAAAGGTCTATATGTTAATTCATAATATATTTTTATATTCGATCATAAATTAGTTTATAT	GCTGCTGCTGGACATACACCTATATTATTGGAAGCTAGAGATGTTTTAGGAGGAAATGTC----------TTCATAATACATTTTTATATTTGATCATAAATTAGTTTATAT	102	295	del	N/A
157	GCTGATGCTGGACATACACCTATATTATTGGAAGCTAGAGATGTTCTGGGAGGAAAGGTCTATATGTTAATTCATAATATATTTTTATATTCGATCATAAATTAGTTTATAT	GCTGATGCTTGACATACACCTATATTATTGGAAGCTAGAGATGTTCTGGGAGGAAAGGTCTATATGTTAATTCATAATATATTTTTATATTCGATCATAAATTAGTTTATAT	112	291	Sub	N/A
158	GCTGATGCTGGACATACACCTATATTATTGGAAGCTAGAGATGTTCTGGGAGGAAAGGTCTATATGTTAATTCATAATATATTTTTATATTCGATCATAAATTAGTTTATAT	GCTGATGCTGGACATACACCTATATTATGGGAAGCTAGAGATGTTCTGGGAGGAAAGGTCTATATGTTAATTCATAATATATTTTTATATTCGATCATAAATTAGTTTATAT	112	290	Sub	N/A
159	GCTGATGCTGGACATACACCTATATTATTGGAAGCTAGAGATGTTCTGGGAGGAAAGGTCTATATGTTAATTCATAATATATTTTTATATTCGATCATAAATTAGTTTATAT	GCTGATGCTGGACATACACCTATATTATTGGAAGCTAGAGATATTCTGGGAGGAAAGGTCTATATGTTAATTCATAATATATTTTTATATTCGATCATAAATTAGTTTATAT	112	290	Sub	N/A
160	GCTGATGCTGGACATACACCTATATTATTGGAAGCTAGAGATGTTCTGGGAGGAAAGGTCTATATGTTAATTCATAATATATTTTTATATTCGATCATAAATTAGTTTATAT	GCTGATGCTGGACATACACCTATATTATTGGAAGCTAGAGATGTTCTGGGGGGAAAGGTC----------TTCATAATATATTTTTATATTTGATCATAAATTAGTTTATAT	102	289	del	N/A
161	GCTGATGCTGGACATACACCTATATTATTGGAAGCTAGAGATGTTCTGGGAGGAAAGGTCTATATGTTAATTCATAATATATTTTTATATTCGATCATAAATTAGTTTATAT	GCTGATGCTGGACATACACCTATATTATTGGAAGCTAGAGATGTTCTGGGAGGAAAGGTCTATATGTTAATTCATAATATATTTGTATATTCGATCATAAATTAGTTTATAT	112	289	Sub	N/A
162	GCTGATGCTGGACATACACCTATATTATTGGAAGCTAGAGATGTTCTGGGAGGAAAGGTCTATATGTTAATTCATAATATATTTTTATATTCGATCATAAATTAGTTTATAT	GCTGATGCTGGACATCCACCTATATTATTGGAAGCTAGAGATGTTCTGGGAGGAAAGGTCTATATGTTAATTCATAATATATTTTTATATTCGATCATAAATTAGTTTATAT	112	288	Sub	N/A
163	GCTGATGCTGGACATACACCTATATTATTGGAAGCTAGAGATGTTCTGGGAGGAAAGGTCTATATGTTAATTCATAATATATTTTTATATTCGATCATAAATTAGTTTATAT	GCTGAAGCTGGACATACACCTATATTATTGGAAGCTAGAGATGTTCTGGGAGGAAAGGTCTATATGTTAATTCATAATATATTTTTATATTCGATCATAAATTAGTTTATAT	112	284	Sub	N/A
164	GCTGATGCTGGACATACACCTATATTATTGGAAGCTAGAGATGTTCTGGGAGGAAAGGTCTATATGTTAATTCATAATATATTTTTATATTCGATCATAAATTAGTTTATAT	GCTGATGCTGGACATACACCTATATTATTGGAAGCTAAAGATGTTCTAGGAGGAAAGGTCTATATGTTAATTCATAATATATTTTTATATTCGATCATAAATTAGTTTATAT	112	283	Sub	N/A
165	GCTGATGCTGGACATACACCTATATTATTGGAAGCTAGAGATGTTCTGGGAGGAAAGGTCTATATGTTAATTCATAATATATTTTTATATTCGATCATAAATTAGTTTATAT	GCTGATGCTGGACATACACCTATATTATTGGAAGCTAGAGATGTTCTGGGAGGAAAGGTCTATATGTTAATTCATAATATATTGTTATATTCGATCATAAATTAGTTTATAT	112	282	Sub	N/A
166	GCTGATGCTGGACATACACCTATATTATTGGAAGCTAGAGATGTTCTGGGAGGAAAGGTCTATATGTTAATTCATAATATATTTTTATATTCGATCATAAATTAGTTTATAT	GCTGATGCTGGACATACACCTATATTCTTGGAAGCTAGAGATGTTTTAGGAGGAAATGTC----------TTCATAATACATTTTTATATTTGATCATAAATTAGTTTATAT	102	282	del	N/A
167	GCTGATGCTGGACATACACCTATATTATTGGAAGCTAGAGATGTTCTGGGAGGAAAGGTCTATATGTTAATTCATAATATATTTTTATATTCGATCATAAATTAGTTTATAT	GCTGATGCTGGACATCCACCTATATTATTGGAAGCTAGAGATGTTTTAGGAGGAAATGTC----------TTCATAATACATTTTTATATTTGATCATAAATTAGTTTATAT	102	281	del	N/A
168	GCTGATGCTGGACATACACCTATATTATTGGAAGCTAGAGATGTTCTGGGAGGAAAGGTCTATATGTTAATTCATAATATATTTTTATATTCGATCATAAATTAGTTTATAT	GCTGATGTTGGACATACACCTATATTATTGGAAGCTAGAGATGTTCTGGGAGGAAAGGTCTATATGTTAATTCATAATATATTTTTATATTCGATCATAAATTAGTTTATAT	112	276	Sub	N/A
169	GCTGATGCTGGACATACACCTATATTATTGGAAGCTAGAGATGTTCTGGGAGGAAAGGTCTATATGTTAATTCATAATATATTTTTATATTCGATCATAAATTAGTTTATAT	GCTGATGCTGGACATACACCTATATTATTGTAAGCTAGAGATGTTCTGGGAGGAAAGGTCTATATGTTAATTCATAATATATTTTTATATTCGATCATAAATTAGTTTATAT	112	274	Sub	N/A
170	GCTGATGCTGGACATACACCTATATTATTGGAAGCTAGAGATGTTCTGGGAGGAAAGGTCTATATGTTAATTCATAATATATTTTTATATTCGATCATAAATTAGTTTATAT	GCTGATGCTGGACATACACCTATATTATTGGAAGGTAGAGATGTTCTGGGAGGAAAGGTCTATATGTTAATTCATAATATATTTTTATATTCGATCATAAATTAGTTTATAT	112	274	Sub	N/A
171	GCTGATGCTGGACATACACCTATATTATTGGAAGCTAGAGATGTTCTGGGAGGAAAGGTCTATATGTTAATTCATAATATATTTTTATATTCGATCATAAATTAGTTTATAT	GCTGATGCTGGACATACACCTATATTATTGGAAGTTAGAGATGTTCTGGGAGGAAAGGTCTATATGTTAATTCATAATATATTTTTATATTCGATCATAAATTAGTTTATAT	112	272	Sub	N/A
172	GCTGATGCTGGACATACACCTATATTATTGGAAGCTAGAGATGTTCTGGGAGGAAAGGTCTATATGTTAATTCATAATATATTTTTATATTCGATCATAAATTAGTTTATAT	GCTGATGCTGGACATACACCTATATTATTGGGAGCTAGAGATGTTTTAGGAGGAAATGTC----------TTCATAATACATTTTTATATTTGATCATAAATTAGTTTATAT	102	271	del	N/A
173	#NAME?	GCTGATGCTGGACATACACCGCTGATGCTGGACATACACCGCTGATGCTGGACATACACCTATATTATTGGAAGCTAGAGATGTTTTAGGAGGAAAGGTC----------TTCATAATATATTTTTATATTTGATCATAAATTAGTTTATAT	142	271	Ins	N/A
174	GCTGATGCTGGACATACACCTATATTATTGGAAGCTAGAGATGTTCTGGGAGGAAAGGTCTATATGTTAATTCATAATATATTTTTATATTCGATCATAAATTAGTTTATAT	GCTGATGCTGGACATACACCTATATTATTGGAAGCTAGAGATGTTGTGGGAGGAAAGGTCTATATGTTAATTCATAATATATTTTTATATTCGATCATAAATTAGTTTATAT	112	270	Sub	N/A
175	GCTGATGCTGGACATACACCTATATTATTGGAAGCTAGAGATGTTCTGGGAGGAAAGGTCTATATGTTAATTCATAATATATTTTTATATTCGATCATAAATTAGTTTATAT	GCTGATGCTGGACATACACCTATATTATTGGAAGCTAGAGATGTTCTGGGAGGAAAGGTCTATATGTTAATTCATAATATATTTCTATATTCGATCATAAATTAGTTTATAT	112	269	Sub	N/A
176	GCTGATGCTGGACATACACCTATATTATTGGAAGCTAGAGATGTTCTGGGAGGAAAGGTCTATATGTTAATTCATAATATATTTTTATATTCGATCATAAATTAGTTTATAT	GCTGATGCTGGACATACACCTATATTATTGGAAGCCAGAGATGTTTTAGGAGGAAAGGTC----------TTCATAATATATTTTTATATTTGATCATAAATTAGTTTATAT	102	269	del	N/A
177	GCTGATGCTGGACATACACCTATATTATTGGAAGCTAGAGATGTTCTGGGAGGAAAGGTCTATATGTTAATTCATAATATATTTTTATATTCGATCATAAATTAGTTTATAT	GCTGATGCTGGACATACACCTATACTATTGGAAGCTAGAGATGTTTTAGGAGGAAAGGTC----------TTCATAATACATTTTTATATTTGATCATAAATTAGTTTATAT	102	267	del	N/A
178	#NAME?	GCTGATGCTGGACATACACCGCTGATGCTGGACATACACCGCTGATGCTGGACATACACCTATATTATTGGAAGCTAGAGATGTTTTAGGAGGAAATGTC----------TTCATAATACATTTTTATATTTGATCATAAATTAGTTTATAT	142	266	Ins	N/A
179	GCTGATGCTGGACATACACCTATATTATTGGAAGCTAGAGATGTTCTGGGAGGAAAGGTCTATATGTTAATTCATAATATATTTTTATATTCGATCATAAATTAGTTTATAT	GCTGATGCTGGACATACACCTATATTATTGGAAGCTAGAGATGTCTTAGGAGGAAAGGTC----------TTCATAATATATTTTTATATTTGATCATAAATTAGTTTATAT	102	266	del	N/A
180	GCTGATGCTGGACATACACCTATATTATTGGAAGCTAGAGATGTTCTGGGAGGAAAGGTCTATATGTTAATTCATAATATATTTTTATATTCGATCATAAATTAGTTTATAT	GCTGATGCTGGACATACACCTATATTATTGGAAGCTCGAGATGTTTTAGGAGGAAATGTC----------TTCATAATACATTTTTATATTTGATCATAAATTAGTTTATAT	102	266	del	N/A
181	GCTGATGCTGGACATACACCTATATTATTGGAAGCTAGAGATGTTCTGGGAGGAAAGGTCTATATGTTAATTCATAATATATTTTTATATTCGATCATAAATTAGTTTATAT	GCTGATGCTGGACATACACCTATATTAATGGAAGCTAGAGATGTTTTAGGAGGAAAGGTC----------TTCATAATATATTTTTATATTTGATCATAAATTAGTTTATAT	102	266	del	N/A
182	GCTGATGCTGGACATACACCTATATTATTGGAAGCTAGAGATGTTCTGGGAGGAAAGGTCTATATGTTAATTCATAATATATTTTTATATTCGATCATAAATTAGTTTATAT	GCTGATGCTGGACATACACCTATATTATTGGAAGCTAGAGATGTTTTAGGAGGAAAGGTC----------TTCATAATATATTTTTATATTTGATTATAAATTAGTTTATAT	102	265	del	N/A
183	GCTGATGCTGGACATACACCTATATTATTGGAAGCTAGAGATGTTCTGGGAGGAAAGGTCTATATGTTAATTCATAATATATTTTTATATTCGATCATAAATTAGTTTATAT	GCTGATGCTTGACATACACCTATATTATTGGAAGCTAGAGATGTTTTAGGAGGAAAGGTC----------TTCATAATATATTTTTATATTTGATCATAAATTAGTTTATAT	102	265	del	N/A
184	GCTGATGCTGGACATACACCTATATTATTGGAAGCTAGAGATGTTCTGGGAGGAAAGGTCTATATGTTAATTCATAATATATTTTTATA-TTCGATCATAAATTAGTTTATAT	GCTGATGCTGGACATACACCTATATTATTGGAAGCTAGAGATGTTCTGGGAGGAAAGGTC----------TTCATAATATATTTTTATATTTTGATCATAAATTAGTTTATAT	103	264	del	N/A
185	GCTGATGCTGGACATACACCTATATTATTGGAAGCTAGAGATGTTCTGGGAGGAAAGGTCTATATGTTAATTCATAATATATTTTTATATTCGATCATAAATTAGTTTATAT	GCTGATGCTGGACATACACCCATATTATTGGAAGCTAGAGATGTTCTGGGAGGAAAGGTCTATATGTTAATTCATAATATATTTTTATATTCGATCATAAATTAGTTTATAT	112	264	Sub	N/A
186	GCTGATGCTGGACATACACCTATATTATTGGAAGCTAGAGATGTTCTGGGAGGAAAGGTCTATATGTTAATTCATAATATATTTTTATATTCGATCATAAATTAGTTTATAT	GCTGATGCTGGACATACACCTATATTATTTGAAGCTAGAGATGTTTTAGGAGGAAATGTC----------TTCATAATACATTTTTATATTTGATCATAAATTAGTTTATAT	102	263	del	N/A
187	GCTGATGCTGGACATACACCTATATTATTGGAAGCTAGAGATGTTCTGGGAGGAAAGGTCTATATGTTAATTCATAATATATTTTTATATTCGATCATAAATTAGTTTATAT	GCTGATGCTGGACCTACACCTATATTATTGGAAGCTAGAGATGTTTTAGGAGGAAAGGTC----------TTCATAATATATTTTTATATTTGATCATAAATTAGTTTATAT	102	263	del	N/A
188	GCTGATGCTGGACATACACCTATATTATTGGAAGCTAGAGATGTTCTGGGAGGAAAGGTCTATATGTTAATTCATAATATATTTTTATATTCGATCATAAATTAGTTTATAT	GCTGATGCTGGACATCCACCTATATTATTGGAAGCTAGAGATGTTTTAGGAGGAAAGGTC----------TTCATAATATATTTTTATATTTGATCATAAATTAGTTTATAT	102	261	del	N/A
189	GCTGATGCTGGACATACACCTATATTATTGGAAGCTAGAGATGTTCTGGGAGGAAAGGTCTATATGTTAATTCATAATATATTTTTATATTCGATCATAAATTAGTTTATAT	GCTGATGCTGGACATACACCTATATTATTGGAAGCTAGAGATGTTCTGGGAGGAAAGGTCTATATGTTAATTCATAATATATTTTTATATTCGATCATACATTAGTTTATAT	112	260	Sub	N/A
190	GCTGATGCTGGACATACACCTATATTATTGGAAGCTAGAGATGTTCTGGGAGGAAAGGTCTATATGTTAATTCATAATATATTTTTATATTCGATCATAAATTAGTTTATAT	GCTGATGCTGGACATACACCTATATTATTGGAAGCTAGAGATGTTTTAGGAGGTAATGTC----------TTCATAATACATTTTTATATTTGATCATAAATTAGTTTATAT	102	256	del	N/A
191	GCTGATGCTGGACATACACCTATATTATTGGAAGCTAGAGATGTTCTGGGAGGAAAGGTCTATATGTTAATTCATAATATATTTTTATATTCGATCATAAATTAGTTTATAT	GCTGATGCTGGACATACACCTATATTATTGGAAGCTAGAGATGTTTTAGGAGGAAATGTC----------TTCATAATACATTTTTATATTTGATTATAAATTAGTTTATAT	102	256	del	N/A
192	GCTGATGCTGGACATACACCTATATTATTGGAAGCTAGAGATGTTCTGGGAGGAAAGGTCTATATGTTAATTCATAATATATTTTTATATTCGATCATAAATTAGTTTATAT	GCTGATGCTGGACATACACCTATATTATTGTAAGCTAGAGATGTTTTAGGAGGAAAGGTC----------TTCATAATATATTTTTATATTTGATCATAAATTAGTTTATAT	102	251	del	N/A
193	GCTGATGCTGGACATACACCTATATTATTGGAAGCTAGAGATGTTCTGGGAGGAAAGGTCTATATGTTAATTCATAATATATTTTTATATTCGATCATAAATTAGTTTATAT	GCTGATGCTGGACATACACCTATATTATTGGAAGCTCGAGATGTTCTGGGAGGAAAGGTCTATATGTTAATTCATAATATATTTTTATATTCGATCATAAATTAGTTTATAT	112	250	Sub	N/A
194	GCTGATGCTGGACATACACCTATATTATTGGAAGCTAGAGATGTTCTGGGAGGAAAGGTCTATATGTTAATTCATAATATATTTTTATATTCGATCATAAATTAGTTTATAT	GCTGATGCTGGACATACACCTATATTATTGGAAGCTAGAGATGTTCTGGGAGGAAAGGTCTATATGTTAGTTCATAATATATTTTTATATTCGATCATAAATTAGTTTATAT	112	249	Sub	N/A
195	GCTGATGCTGGACATACACCTATATTATTGGAAGCTAGAGATGTTCTGGGAGGAAAGGTCTATATGTTAATTCATAATATATTTTTATATTCGATCATAAATTAGTTTATAT	GCTGATGCTGGACATACACCTATATTATTGGAAGCTAGAGATGTTTTAGGGGGAAAGGTC----------TTCATAATATATTTTTATATTTGATCATAAATTAGTTTATAT	102	249	del	N/A
196	GCTGATGCTGGACATACACCTATATTATTGGAAGCTAGAGATGTTCTGGGAGGAAAGGTCTATATGTTAATTCATAATATATTTTTATATTCGATCATAAATTAGTTTATAT	GCTGATGCTGGACATACACCTATATTATTGGAAGCTAGAGATGTTTTAGGAGGCAATGTC----------TTCATAATACATTTTTATATTTGATCATAAATTAGTTTATAT	102	248	del	N/A
197	GCTGATGCTGGACATACACCTATATTATTGGAAGCTAGAGATGTTCTGGGAGGAAAGGTCTATATGTTAATTCATAATATATTTTTATATTCGATCATAAATTAGTTTATAT	GCTGATGCTGGACATACACCTATATTATTGGAAGCTAGAGATGTTCTGGGAGGAAAGGTCCATATGTTAATTCATAATATATTTTTATATTCGATCATAAATTAGTTTATAT	112	247	Sub	N/A
198	GCTGATGCTGGACATACACCTATATTATTGGAAGCTAGAGATGTTCTGGGAGGAAAGGTCTATATGTTAATTCATAATATATTTTTATATTCGATCATAAATTAGTTTATAT	GCTGATGCTGGACATACACCTATATTATTGGAAGCTAGAGATGTTCTGGGAGGAGAGGTCTATATGTTAATTCATAATATATTTTTATATTCGATCATAAATTAGTTTATAT	112	244	Sub	N/A
199	GCTGATGCTGGACATACACCTATATTATTGGAAGCTAGAGATGTTCTGGGAGGAAAGGTCTATATGTTAATTCATAATATATTTTTATATTCGATCATAAATTAGTTTATAT	GATGATGCTGGACATACACCTATATTATTGGAAGCTAGAGATGTTTTAGGAGGAAAGGTC----------TTCATAATATATTTTTATATTTGATCATAAATTAGTTTATAT	102	243	del	N/A
200	GCTGATGCTGGACATACACCTATATTATTGGAAGCTAGAGATGTTCTGGGAGGAAAGGTCTATATGTTAATTCATAATATATTTTTATATTCGATCATAAATTAGTTTATAT	GCTGATGCTGGACATACACCTATATTATTGGAAGATAGAGATGTTTTAGGAGGAAAGGTC----------TTCATAATATATTTTTATATTTGATCATAAATTAGTTTATAT	102	242	del	N/A
201	GCTGATGCTGGACATACACCTATATTATTGGAAGCTAGAGATGTTCTGGGAGGAAAGGTCTATATGTTAATTCATAATATATTTTTATATTCGATCATAAATTAGTTTATAT	GCTGATGCTGGACATACACCTATATTATTGGAAGCTAGAGATGCTCTGGGAGGAAAGGTCTATATGTTAATTCATAATATATTTTTATATTCGATCATAAATTAGTTTATAT	112	241	Sub	N/A
202	GCTGATGCTGGACATACACCTATATTATTGGAAGCTAGAGATGTTCTGGGAGGAAAGGTCTATATGTTAATTCATAATATATTTTTATATTCGATCATAAATTAGTTTATAT	GCTGATGCTGGACATACCCCTATATTATTGGAAGCTAGAGATGTTCTGGGAGGAAAGGTCTATATGTTAATTCATAATATATTTTTATATTCGATCATAAATTAGTTTATAT	112	240	Sub	N/A
203	GCTGATGCTGGACATACACCTATATTATTGGAAGCTAGAGATGTTCTGGGAGGAAAGGTCTATATGTTAATTCATAATATATTTTTATATTCGATCATAAATTAGTTTATAT	GCTGATGCTGGACATACACCTATATTATTGGAAGCTAGAGATGTTTTAGGAGGAAAGGTC----------TTTATAATATATTTTTATATTTGATCATAAATTAGTTTATAT	102	236	del	N/A
204	GCTGATGCTGGACATACACCTATATTATTGGAAGCTAGAGATGTTCTGGGAGGAAAGGTCTATATGTTAATTCATAATATATTTTTATATTCGATCATAAATTAGTTTATAT	GCTGACGCTGGACATACACCTATATTATTGGAAGCTAGAGATGTTCTGGGAGGAAAGGTCTATATGTTAATTCATAATATATTTTTATATTCGATCATAAATTAGTTTATAT	112	236	Sub	N/A
205	GCTGATGCTGGACATACACCTATATTATTGGAAGCTAGAGATGTTCTGGGAGGAAAGGTCTATATGTTAATTCATAATATATTTTTATATTCGATCATAAATTAGTTTATAT	GCTGAAGCTGGACATACACCTATATTATTGGAAGCTAGAGATGTTTTAGGAGGAAAGGTC----------TTCATAATATATTTTTATATTTGATCATAAATTAGTTTATAT	102	235	del	N/A
206	GCTGATGCTGGACATACACCTATATTATTGGAAGCTAGAGATGTTCTGGGAGGAAAGGTCTATATGTTAATTCATAATATATTTTTATATTCGATCATAAATTAGTTTATAT	GCTGATGCTGGACATACACCTATATTATTGGAATCTAGAGATGTTTTAGGAGGAAAGGTC----------TTCATAATATATTTTTATATTTGATCATAAATTAGTTTATAT	102	233	del	N/A
207	GCTGATGCTGGACATACACCTATATTATTGGAAGCTAGAGATGTTCTGGGAGGAAAGGTCTATATGTTAATTCATAATATATTTTTATATTCGATCATAAATTAGTTTATAT	GCTGATGCTGGACATACACTTATATTATTGGAAGCTAGAGATGTTCTGGGAGGAAAGGTCTATATGTTAATTCATAATATATTTTTATATTCGATCATAAATTAGTTTATAT	112	232	Sub	N/A
208	GCTGATGCTGGACATACACCTATATTATTGGAAGCTAGAGATGTTCTGGGAGGAAAGGTCTATATGTTAATTCATAATATATTTTTATATTCGATCATAAATTAGTTTATAT	GATGATGCTGGACATACACCTATATTATTGGAAGCTAGAGATGTTTTAGGAGGAAATGTC----------TTCATAATACATTTTTATATTTGATCATAAATTAGTTTATAT	102	232	del	N/A
209	GCTGATGCTGGACATACACCTATATTATTGGAAGCTAGAGATGTTCTGGGAGGAAAGGTCTATATGTTAATTCATAATATATTTTTATATTCGATCATAAATTAGTTTATAT	GCTGATGCTGGACATATACCTATATTATTGGAAGCTAGAGATGTTTTAGGAGGAAAGGTC----------TTCATAATATATTTTTATATTTGATCATAAATTAGTTTATAT	102	232	del	N/A
210	GCTGATGCTGGACATACACCTATATTATTGGAAGCTAGAGATGTTCTGGGAGGAAAGGTCTATATGTTAATTCATAATATATTTTTATATTCGATCATAAATTAGTTTATAT	GCTGATGCTGGACATACACCTATATTATTGGAAGCTAGAGATGCTTTAGGAGGAAAGGTC----------TTCATAATATATTTTTATATTTGATCATAAATTAGTTTATAT	102	232	del	N/A
211	GCTGATGCTGGACATACACCTATATTATTGGAAGCTAGAGATGTTCTGGGAGGAAAGGTCTATATGTTAATTCATAATATATTTTTATATTCGATCATAAATTAGTTTATAT	GCTGATGCTGGACATACACCTATATTATTGGAAGCTAGAGATGTTCTGGGAGGAAGGGTCTATATGTTAATTCATAATATATTTTTATATTCGATCATAAATTAGTTTATAT	112	230	Sub	N/A
212	GCTGATGCTGGACATACACCTATATTATTGGAAGCTAGAGATGTTCTGGGAGGAAAGGTCTATATGTTAATTCATAATATATTTTTATATTCGATCATAAATTAGTTTATAT	GCTGATGCTGGACATACACCTATATTATTGGAAGCTAGAGATGTTCTGGGAGGAAAGGCCTATATGTTAATTCATAATATATTTTTATATTCGATCATAAATTAGTTTATAT	112	228	Sub	N/A
213	GCTGATGCTGGACATACACCTATATTATTGGAAGCTAGAGATGTTCTGGGAGGAAAGGTCTATATGTTAATTCATAATATATTTTTATATTCGATCATAAATTAGTTTATAT	GCTGATGCTGGACATACACCTATATCATTGGAAGCTAGAGATGTTTTAGGAGGAAAGGTC----------TTCATAATATATTTTTATATTTGATCATAAATTAGTTTATAT	102	228	del	N/A
214	GCTGATGCTGGACATACACCTATATTATTGGAAGCTAGAGATGTTCTGGGAGGAAAGGTCTATATGTTAATTCATAATATATTTTTATATTCGATCATAAATTAGTTTATAT	GCTGATGCTGGACATACACCTATATTATTGGAAGCCAGAGATGTTTTAGGAGGAAATGTC----------TTCATAATACATTTTTATATTTGATCATAAATTAGTTTATAT	102	228	del	N/A
215	GCTGATGCTGGACATACACCTATATTATTGGAAGCTAGAGATGTTCTGGGAGGAAAGGTCTATATGTTAATTCATAATATATTTTTATATTCGATCATAAATTAGTTTATAT	GCTGATGCTGGACCTACACCTATATTATTGGAAGCTAGAGATGTTTTAGGAGGAAATGTC----------TTCATAATACATTTTTATATTTGATCATAAATTAGTTTATAT	102	226	del	N/A
216	GCTGATGCTGGACATACACCTATATTATTGGAAGCTAGAGATGTTCTGGGAGGAAAGGTCTATATGTTAATTCATAATATATTTTTATATTCGATCATAAATTAGTTTATAT	GCTGATGCTGGACATACACCCATATTATTGGAAGCTAGAGATGTTTTAGGAGGAAAGGTC----------TTCATAATATATTTTTATATTTGATCATAAATTAGTTTATAT	102	224	del	N/A
217	GCTGATGCTGGACATACACCTATATTATTGGAAGCTAGAGATGTTCTGGGAGGAAAGGTCTATATGTTAATTCATAATATATTTTTATATTCGATCATAAATTAGTTTATAT	GCTGATGCTGGACATACACCTATATTATCGGAAGCTAGAGATGTTCTGGGAGGAAAGGTCTATATGTTAATTCATAATATATTTTTATATTCGATCATAAATTAGTTTATAT	112	221	Sub	N/A
218	GCTGATGCTGGACATACACCTATATTATTGGAAGCTAGAGATGTTCTGGGAGGAAAGGTCTATATGTTAATTCATAATATATTTTTATA-TTCGATCATAAATTAGTTTATAT	GCTGATGCTGGACATACACCTATATTATTGGAAGCTAGAGATGTTTTAGGAGGAAATGTC----------TTCATAATACATTTTTATATTTTGATCATAAATTAGTTTATAT	103	221	del	N/A
219	GCTGATGCTGGACATACACCTATATTATTGGAAGCTAGAGATGTTCTGGGAGGAAAGGTCTATATGTTAATTCATAATATATTTTTATATTCGATCATAAATTAGTTTATAT	GCTGAAGCTGGACATACACCTATATTATTGGAAGCTAGAGATGTTTTAGGAGGAAATGTC----------TTCATAATACATTTTTATATTTGATCATAAATTAGTTTATAT	102	221	del	N/A
220	GCTGATGCTGGACATACACCTATATTATTGGAAGCTAGAGATGTTCTGGGAGGAAAGGTCTATATGTTAATTCATAATATATTTTTATATTCGATCATAAATTAGTTTATAT	GCTGATGCTGGACATACACCTATATTATTGGAAGCTAGAGATGTTGTAGGAGGAAATGTC----------TTCATAATACATTTTTATATTTGATCATAAATTAGTTTATAT	102	220	del	N/A
221	GCTGATGCTGGACATACACCTATATTATTGGAAGCTAGAGATGTTCTGGGAGGAAAGGTCTATATGTTAATTCATAATATATTTTTATATTCGATCATAAATTAGTTTATAT	GCTGATGCTGGACATACACCTATAGTATTGGAAGCTAGAGATGTTCTGGGAGGAAAGGTCTATATGTTAATTCATAATATATTTTTATATTCGATCATAAATTAGTTTATAT	112	219	Sub	N/A
222	GCTGATGCTGGACATACACCTATATTATTGGAAGCTAGAGATGTTCTGGGAGGAAAGGTCTATATGTTAATTCATAATATATTTTTATATTCGATCATAAATTAGTTTATAT	GCTGATGCTGGACATACACCTATATTATTGGAAGCTAGAGATGTTCTGGGAGGAAAGGTCTATATGTTAATTCATAATATATTTTTGTATTCGATCATAAATTAGTTTATAT	112	219	Sub	N/A
223	GCTGATGCTGGACATACACCTATATTATTGGAAGCTAGAGATGTTCTGGGAGGAAAGGTCTATATGTTAATTCATAATATATTTTTATATTCGATCATAAATTAGTTTATAT	GCTGATGCTGGACATATACCTATATTATTGGAAGCTAGAGATGTTCTGGGAGGAAAGGTCTATATGTTAATTCATAATATATTTTTATATTCGATCATAAATTAGTTTATAT	112	219	Sub	N/A
224	GCTGATGCTGGACATACACCTATATTATTGGAAGCTAGAGATGTTCTGGGAGGAAAGGTCTATATGTTAATTCATAATATATTTTTATATTCGATCATAAATTAGTTTATAT	GCTGATGCTGGACATACACCTATATTATTGGAAGCTAGAGATGTTTTGGGAGGAAAGGTC----------TTCATAATATATTTTTATATTTGATCATAAATTAGTTTATAT	102	218	del	N/A
225	GCTGATGCTGGACATACACCTATATTATTGGAAGCTAGAGATGTTCTGGGAGGAAAGGTCTATATGTTAATTCATAATATATTTTTATATTCGATCATAAATTAGTTTATAT	GCTGATGCTGGACATACACCTATATTAATGGAAGCTAGAGATGTTTTAGGAGGAAATGTC----------TTCATAATACATTTTTATATTTGATCATAAATTAGTTTATAT	102	217	del	N/A
226	GCTGATGCTGGACATACACCTATATTATTGGAAGCTAGAGATGTTCTGGGAGGAAAGGTCTATATGTTAATTCATAATATATTTTTATATTCGATCATAAATTAGTTTATAT	GCTGATGCTGGACATACACCTATATTATTGGAAGCTAGAGATGTTCTAGGAGGAAAGGTCTATATGTTAATTCATAATATATTTTTATATTCGATCATAAATTAGTTTATAT	112	216	Sub	N/A
227	GCTGATGCTGGACATACACCTATATTATTGGAAGCTAGAGATGTTCTGGGAGGAAAGGTCTATATGTTAATTCATAATATATTTTTATATTCGATCATAAATTAGTTTATAT	GCTGATGCTGGACATACACCTATATTATTGGAAGCTAGAGATGTTCTGGGAGGGAAGGTCTATATGTTAATTCATAATATATTTTTATATTCGATCATAAATTAGTTTATAT	112	216	Sub	N/A
228	GCTGATGCTGGACATACACCTATATTATTGGAAGCTAGAGATGTTCTGGGAGGAAAGGTCTATATGTTAATTCATAATATATTTTTATATTCGATCATAAATTAGTTTATAT	GCTGATGCTGGACATACACCTATATTATTGGAAGCTAGAGATGTTCTGGGAGGAAAGGTCTATATGTTAATTCATAATATATTTTTATACTCGATCATAAATTAGTTTATAT	112	216	Sub	N/A
229	GCTGATGCTGGACATACACCTATATTATTGGAAGCTAGAGATGTTCTGGGAGGAAAGGTCTATATGTTAATTCATAATATATTTTTATATTCGATCATAAATTAGTTTATAT	TCTGATGCTGGACATACACCTATATTATTGGAAGCTAGAGATGTTCTGGGAGGAAAGGTCTATATGTTAATTCATAATATATTTTTATATTCGATCATAAATTAGTTTATAT	112	215	Sub	N/A
230	GCTGATGCTGGACATACACCTATATTATTGGAAGCTAGAGATGTTCTGGGAGGAAAGGTCTATATGTTAATTCATAATATATTTTTATATTCGATCATAAATTAGTTTATAT	GCTGATGCTGGACATACACCTATATTATTGGAAACTAGAGATGTTTTAGGAGGAAATGTC----------TTCATAATACATTTTTATATTTGATCATAAATTAGTTTATAT	102	215	del	N/A
231	GCTGATGCTGGACATACACCTATATTATTGGAAGCTAGAGATGTTCTGGGAGGAAAGGTCTATATGTTAATTCATAATATATTTTTATATTCGATCATAAATTAGTTTATAT	GCTGATGCTGGACATACACCTATATTATTGGAAGCTAGAGATGTTCTGGGAGGAAAGGTCTATATGTTAATTCATAACATATTTTTATATTCGATCATAAATTAGTTTATAT	112	213	Sub	N/A
232	GCTGATGCTGGACATACACCTATATTATTGGAAGCTAGAGATGTTCTGGGAGGAAAGGTCTATATGTTAATTCATAATATATTTTTATATTCGATCATAAATTAGTTTATAT	GCTGATGCTGGACATACACCTATATTATTAGAAGCTAGAGATGTTTTAGGAGGAAATGTC----------TTCATAATACATTTTTATATTTGATCATAAATTAGTTTATAT	102	213	del	N/A
233	GCTGATGCTGGACATACACCTATATTATTGGAAGCTAGAGATGTTCTGGGAGGAAAGGTCTATATGTTAATTCATAATATATTTTTATATTCGATCATAAATTAGTTTATAT	GCTGATGCTGGACATACACCTATATTATTGGAAGCTAGAGATGTATTAGGAGGAAAGGTC----------TTCATAATATATTTTTATATTTGATCATAAATTAGTTTATAT	102	212	del	N/A
234	GCTGATGCTGGACATACACCTATATTATTGGAAGCTAGAGATGTTCTGGGAGGAAAGGTCTATATGTTAATTCATAATATATTTTTATATTCGATCATAAATTAGTTTATAT	GCTGACGCTGGACATACACCTATATTATTGGAAGCTAGAGATGTTTTAGGAGGAAAGGTC----------TTCATAATATATTTTTATATTTGATCATAAATTAGTTTATAT	102	210	del	N/A
235	GCTGATGCTGGACATACACCTATATTATTGGAAGCTAGAGATGTTCTGGGAGGAAAGGTCTATATGTTAATTCATAATATATTTTTATATTCGATCATAAATTAGTTTATAT	GCTGATGCTGGACATACACCTATATTATTGGAAGCTAGAGATGTTCTGGGAGGAAAGGTCTGTATGTTAATTCATAATATATTTTTATATTCGATCATAAATTAGTTTATAT	112	210	Sub	N/A
236	GCTGATGCTGGACATACACCTATATTATTGGAAGCTAGAGATGTTCTGGGAGGAAAGGTCTATATGTTAATTCATAATATATTTTTATATTCGATCATAAATTAGTTTATAT	GCTGATGCTTGACATACACCTATATTATTGGAAGCTAGAGATGTTTTAGGAGGAAATGTC----------TTCATAATACATTTTTATATTTGATCATAAATTAGTTTATAT	102	210	del	N/A
237	GCTGATGCTGGACATACACCTATATTATTGGAAGCTAGAGATGTTCTGGGAGGAAAGGTCTATATGTTAATTCATAATATATTTTTATATTCGATCATAAATTAGTTTATAT	GCTGATGCTGGACATACACCTATATTATTGGAAGCTAAAGATGTTCTAGGAGGAAAGGTCTATAAGTTAATTCATAATATATTTTTATATTTGATCATAAATTAGTTTATGT	112	209	Sub	N/A
238	GCTGATGCTGGACATACACCTATATTATTGGAAGCTAGAGATGTTCTGGGAGGAAAGGTCTATATGTTAATTCATAATATATTTTTATATTCGATCATAAATTAGTTTATAT	GCTGATGCTGGACATACACCTATATTATTGGATGCTAGAGATGTTCTGGGAGGAAAGGTCTATATGTTAATTCATAATATATTTTTATATTCGATCATAAATTAGTTTATAT	112	204	Sub	N/A
239	GCTGATGCTGGACATACACCTATATTATTGGAAGCTAGAGATGTTCTGGGAGGAAAGGTCTATATGTTAATTCATAATATATTTTTATATTCGATCATAAATTAGTTTATAT	GCTGATGCTGGACATACACCTATATTATTAGAAGCTAGAGATGTTTTAGGAGGAAAGGTC----------TTCATAATATATTTTTATATTTGATCATAAATTAGTTTATAT	102	203	del	N/A
240	GCTGATGCTGGACATACACCTATATTATTGGAAGCTAGAGATGTTCTGGGAGGAAAGGTCTATATGTTAATTCATAATATATTTTTATATTCGATCATAAATTAGTTTATAT	GCTGATGCTGGACATACACCTATATTATTGGAAGCTAGAGATGTTTTAGGAGGAAAGGTC----------CTCATAATATATTTTTATATTTGATCATAAATTAGTTTATAT	102	200	del	N/A
241	GCTGATGCTGGACATACACCTATATTATTGGAAGCTAGAGATGTTCTGGGAGGAAAGGTCTATATGTTAATTCATAATATATTTTTATATTCGATCATAAATTAGTTTATAT	GCTGATGCTGGACATACACCTATATTATTGGAAGCTAGAGATGTTCTGAGAGGAAAGGTCTATATGTTAATTCATAATATATTTTTATATTCGATCATAAATTAGTTTATAT	112	200	Sub	N/A
242	GCTGATGCTGGACATACACCTATATTATTGGAAGCTAGAGATGTTCTGGGAGGAAAGGTCTATATGTTAATTCATAATATATTTTTATATTCGATCATAAATTAGTTTATAT	GCTGATGCTGGACATACACCTATATTATTGGAAGTTAGAGATGTTTTAGGAGGAAATGTC----------TTCATAATACATTTTTATATTTGATCATAAATTAGTTTATAT	102	198	del	N/A
243	GCTGATGCTGGACATACACCTATATTATTGGAAGCTAGAGATGTTCTGGGAGGAAAGGTCTATATGTTAATTCATAATATATTTTTATATTCGATCATAAATTAGTTTATAT	GCTGATGCTGGACATACACCTATATCATTGGAAGCTAGAGATGTTTTAGGAGGAAATGTC----------TTCATAATACATTTTTATATTTGATCATAAATTAGTTTATAT	102	198	del	N/A
244	GCTGATGCTGGACATACACCTATATTATTGGAAGCTAGAGATGTTCTGGGAGGAAAGGTCTATATGTTAATTCATAATATATTTTTATATTCGATCATAAATTAGTTTATAT	GCTGATGCTGGACATACACCTATATTATTGGAAGCTAGAGATGTTCTGGGAGGAAAGGTCTATATGCTAATTCATAATATATTTTTATATTCGATCATAAATTAGTTTATAT	112	197	Sub	N/A
245	GCTGATGCTGGACATACACCTATATTATTGGAAGCTAGAGATGTTCTGGGAGGAAAGGTCTATATGTTAATTCATAATATATTTTTATATTCGATCATAAATTAGTTTATAT	GCTGATGCTGGACATACCCCTATATTATTGGAAGCTAGAGATGTTTTAGGAGGAAATGTC----------TTCATAATACATTTTTATATTTGATCATAAATTAGTTTATAT	102	197	del	N/A
246	GCTGATGCTGGACATACACCTATATTATTGGAAGCTAGAGATGTTCTGGGAGGAAAGGTCTATATGTTAATTCATAATATATTTTTATATTCGATCATAAATTAGTTTATAT	GCTGATGCTGGACATACACCTATATTATTGGAAGCTAGAGATGTGTTAGGAGGAAATGTC----------TTCATAATACATTTTTATATTTGATCATAAATTAGTTTATAT	102	196	del	N/A
247	GCTGATGCTGGACATACACCTATATTATTGGAAGCTAGAGATGTTCTGGGAGGAAAGGTCTATATGTTAATTCATAATATATTTTTATATTCGATCATAAATTAGTTTATAT	TCTGATGCTGGACATACACCTATATTATTGGAAGCTAGAGATGTTTTAGGAGGAAAGGTC----------TTCATAATATATTTTTATATTTGATCATAAATTAGTTTATAT	102	194	del	N/A
248	GCTGATGCTGGACATACACCTATATTATTGGAAGCTAGAGATGTTCTGGGAGGAAAGGTCTATATGTTAATTCATAATATATTTTTATATTCGATCATAAATTAGTTTATAT	GCTGATGCTGGACATACACCTATATTATTGGAAGCTAGAGATGTTCTGGGAGGAAAGGTCTATATGTTAATTCATAATATATTTTTACATTCGATCATAAATTAGTTTATAT	112	194	Sub	N/A
249	GCTGATGCTGGACATACACCTATATTATTGGAAGCTAGAGATGTTCTGGGAGGAAAGGTCTATATGTTAATTCATAATATATTTTTATATTCGATCATAAATTAGTTTATAT	GCTGATGCTGGACATACCCCTATATTATTGGAAGCTAGAGATGTTTTAGGAGGAAAGGTC----------TTCATAATATATTTTTATATTTGATCATAAATTAGTTTATAT	102	193	del	N/A
250	GCTGATGCTGGACATACACCTATATTATTGGAAGCTAGAGATGTTCTGGGAGGAAAGGTCTATATGTTAATTCATAATATATTTTTATATTCGATCATAAATTAGTTTATAT	GCTGATGCTGGACATACACCTATATTATTGGAAGCTAGAGATGTTCTGGGAGGAAAGGTCTATATGTTAATCCATAATATATTTTTATATTCGATCATAAATTAGTTTATAT	112	192	Sub	N/A
251	#NAME?	GCTGATGCTGGACATACACCGCTGATGCTGGACATACACCTATATTATTGGAAGCTAGAGATGTTCTGGGGGGAAAGGTCTATATACTGTT-ATTCATAATA---TTTTCGAACACAATATTTGATCATAAATTAGTTTATAT	139	192	Ins	N/A
252	GCTGATGCTGGACATACACCTATATTATTGGAAGCTAGAGATGTTCTGGGAGGAAAGGTCTATATGTTAATTCATAATATATTTTTATATTCGATCATAAATTAGTTTATAT	GCTGATGCTGGACATACACCTCTATTATTGGAAGCTAGAGATGTTCTGGGAGGAAAGGTCTATATGTTAATTCATAATATATTTTTATATTCGATCATAAATTAGTTTATAT	112	190	Sub	N/A
253	GCTGATGCTGGACATACACCTATATTATTGGAAGCTAGAGATGTTCTGGGAGGAAAGGTCTATATGTTAATTCATAATATATTTTTATATTCGATCATAAATTAGTTTATAT	GCTGATGCTGGACATACACCTATATTATTGGAAGCTAGAGATGTTTTAGGAGGAAATGTC----------TTCATAATACATTTTTATATTTGATAATAAATTAGTTTATAT	102	190	del	N/A
254	GCTGATGCTGGACATACACCTATATTATTGGAAGCTAGAGATGTTCTGGGAGGAAAGGTCTATATGTTAATTCATAATATATTTTTATATTCGATCATAAATTAGTTTATAT	GCTGATGCTGGACATATACCTATATTATTGGAAGCTAGAGATGTTTTAGGAGGAAATGTC----------TTCATAATACATTTTTATATTTGATCATAAATTAGTTTATAT	102	189	del	N/A
255	GCTGATGCTGGACATACACCTATATTATTGGAAGCTAGAGATGTTCTGGGAGGAAAGGTCTATATGTTAATTCATAATATATTTTTATATTCGATCATAAATTAGTTTATAT	GCTGATGTTGGACATACACCTATATTATTGGAAGCTAGAGATGTTTTAGGAGGAAAGGTC----------TTCATAATATATTTTTATATTTGATCATAAATTAGTTTATAT	102	189	del	N/A
256	GCTGATGCTGGACATACACCTATATTATTGGAAGCTAGAGATGTTCTGGGAGGAAAGGTCTATATGTTAATTCATAATATATTTTTATATTCGATCATAAATTAGTTTATAT	GCTGATGCTGGACATACACCTATATTATTGGATGCTAGAGATGTTTTAGGAGGAAAGGTC----------TTCATAATATATTTTTATATTTGATCATAAATTAGTTTATAT	102	188	del	N/A
257	GCTGATGCTGGACATACACCTATATTATTGGAAGCTAGAGATGTTCTGGGAGGAAAGGTCTATATGTTAATTCATAATATATTTTTATATTCGATCATAAATTAGTTTATAT	GCTGATGCTGGACATACACCTATATTATTGGAAGCTAGAGATGTTTTAGGAGGAAATGTC----------TTCATAATATGTTTTTATATTTGATCATAAATTAGTTTATAT	102	188	del	N/A
258	GCTGATGCTGGACATACACCTATATTATTGGAAGCTAGAGATGTTCTGGGAGGAAAGGTCTATATGTTAATTCATAATATATTTTTATATTCGATCATAAATTAGTTTATAT	GCTGATGCTGGACATACACCTATATTATTGTAAGCTAGAGATGTTTTAGGAGGAAATGTC----------TTCATAATACATTTTTATATTTGATCATAAATTAGTTTATAT	102	187	del	N/A
259	GCTGATGCTGGACATACACCTATATTATTGGAAGCTAGAGATGTTCTGGGAGGAAAGGTCTATATGTTAATTCATAATATATTTTTATATTCGATCATAAATTAGTTTATAT	GCTGATGCTGGACATACACCTATATTATTGGAAGCTAGAGATGTTTTAGGAGGAAAGGTC----------TTCATAATATATTTTTCTATTTGATCATAAATTAGTTTATAT	102	186	del	N/A
260	GCTGATGCTGGACATACACCTATATTATTGGAAGCTAGAGATGTTCTGGGAGGAAAGGTCTATATGTTAATTCATAATATATTTTTATATTCGATCATAAATTAGTTTATAT	GCCGATGCTGGACATACACCTATATTATTGGAAGCTAGAGATGTTTTAGGAGGAAAGGTC----------TTCATAATATATTTTTATATTTGATCATAAATTAGTTTATAT	102	186	del	N/A
261	GCTGATGCTGGACATACACCTATATTATTGGAAGCTAGAGATGTTCTGGGAGGAAAGGTCTATATGTTAATTCATAATATATTTTTATATTCGATCATAAATTAGTTTATAT	GCTGATGCTGGACATACACCTATATTATTGGAAGCAAGAGATGTTCTGGGAGGAAAGGTCTATATGTTAATTCATAATATATTTTTATATTCGATCATAAATTAGTTTATAT	112	186	Sub	N/A
262	GCTGATGCTGGACATACACCTATATTATTGGAAGCTAGAGATGTTCTGGGAGGAAAGGTCTATATGTTAATTCATAATATATTTTTATA-TTCGATCATAAATTAGTTTATAT	GCTGATGCTGGACATACACCTATATTATTGGAAGCTAGAGATGTTCTGGGAGGAAAGGTCTATATGTTAATTCATAATATATTTTTATATTTTGATCATAAATTAGTTTATAT	113	185	Ins	N/A
263	GCTGATGCTGGACATACACCTATATTATTGGAAGCTAGAGATGTTCTGGGAGGAAAGGTCTATATGTTAATTCATAATATATTTTTATATTCGATCATAAATTAGTTTATAT	GCTGATGCTGGACATACACCTATATTATTGGAAACTAGAGATGTTTTAGGAGGAAAGGTC----------TTCATAATATATTTTTATATTTGATCATAAATTAGTTTATAT	102	185	del	N/A
264	GCTGATGCTGGACATACACCTATATTATTGGAAGCTAGAGATGTTCTGGGAGGAAAGGTCTATATGTTAATTCATAATATATTTTTATATTCGATCATAAATTAGTTTATAT	GCTGATGCTGGACATACACGTATATTATTGGAAGCTAGAGATGTTCTGGGAGGAAAGGTCTATATGTTAATTCATAATATATTTTTATATTCGATCATAAATTAGTTTATAT	112	185	Sub	N/A
265	GCTGATGCTGGACATACACCTATATTATTGGAAGCTAGAGATGTTCTGGGAGGAAAGGTCTATATGTTAATTCATAATATATTTTTATATTCGATCATAAATTAGTTTATAT	GCTGATGCTGGACATACACTTATATTATTGGAAGCTAGAGATGTTTTAGGAGGAAAGGTC----------TTCATAATATATTTTTATATTTGATCATAAATTAGTTTATAT	102	183	del	N/A
266	GCTGATGCTGGACATACACCTATATTATTGGAAGCTAGAGATGTTCTGGGAGGAAAGGTCTATATGTTAATTCATAATATATTTTTATATTCGATCATAAATTAGTTTATAT	GCTGATGCTGGACATACACCCATATTATTGGAAGCTAGAGATGTTTTAGGAGGAAATGTC----------TTCATAATACATTTTTATATTTGATCATAAATTAGTTTATAT	102	183	del	N/A
267	GCTGATGCTGGACATACACCTATATTATTGGAAGCTAGAGATGTTCTGGGAGGAAAGGTCTATATGTTAATTCATAATATATTTTTATATTCGATCATAAATTAGTTTATAT	GCTGATGCTGGACATACACCTATATTATTGGAAGCTAGAGATGTTCTGGGAGGAAAGGTC----------TTCATAATATGTTTTTATATTTGATCATAAATTAGTTTATAT	102	182	del	N/A
268	GCTGATGCTGGACATACACCTATATTATTGGAAGCTAGAGATGTTCTGGGAGGAAAGGTCTATATGTTAATTCATAATATATTTTTATATTCGATCATAAATTAGTTTATAT	GCTGATGCTGGACATACACCTATATTATTGGAAGTTAGAGATGTTTTAGGAGGAAAGGTC----------TTCATAATATATTTTTATATTTGATCATAAATTAGTTTATAT	102	180	del	N/A
269	GCTGATGCTGGACATACACCTATATTATTGGAAGCTAGAGATGTTCTGGGAGGAAAGGTCTATATGTTAATTCATAATATATTTTTATATTCGATCATAAATTAGTTTATAT	GCTGACGCTGGACATACACCTATATTATTGGAAGCTAGAGATGTTTTAGGAGGAAATGTC----------TTCATAATACATTTTTATATTTGATCATAAATTAGTTTATAT	102	180	del	N/A
270	GCTGATGCTGGACATACACCTATATTATTGGAAGCTAGAGATGTTCTGGGAGGAAAGGTCTATATGTTAATTCATAATATATTTTTATATTCGATCATAAATTAGTTTATAT	GCTGATGCTGGACATACACCTATATTATTGGAAGCTAGAGATGTTTTAGGAGGAAAGGTC----------TTCATAATATATTCTTATATTTGATCATAAATTAGTTTATAT	102	179	del	N/A
271	GCTGATGCTGGACATACACCTATATTATTGGAAGCTAGAGATGTTCTGGGAGGAAAGGTCTATA---TGTTAATTCATAATATATTTTT--------ATATTCGATCATAAATTAGTTTATAT	GCTGATGCTGGACATACACCTATATTATTGGAAGCTAGAGATGTTTTAGGAGGAAAGGTCTATATACTGTT-ATTCATAATA---TTTTCGAACACAATATTTGATCATAAATTAGTTTATAT	119	179	Ins	N/A
272	GCTGATGCTGGACATACACCTATATTATTGGAAGCTAGAGATGTTCTGGGAGGAAAGGTCTATATGTTAATTCATAATATATTTTTATATTCGATCATAAATTAGTTTATAT	GCTGATGCTGGACATACACCTATATTATTGGAAGCTAGAGATGTTCTGGGAGGAAAGGTCTATATGTTAATTCATAATATATTTTTATATTCGATCATCAATTAGTTTATAT	112	177	Sub	N/A
273	GCTGATGCTGGACATACACCTATATTATTGGAAGCTAGAGATGTTCTGGGAGGAAAGGTCTATATGTTAATTCATAATATATTTTTATATTCGATCATAAATTAGTTTATAT	GCTGATGCTGGACATACACCTCTATTATTGGAAGCTAGAGATGTTTTAGGAGGAAAGGTC----------TTCATAATATATTTTTATATTTGATCATAAATTAGTTTATAT	102	177	del	N/A
274	GCTGATGCTGGACATACACCTATATTATTGGAAGCTAGAGATGTTCTGGGAGGAAAGGTCTATATGTTAATTCATAATATATTTTTATATTCGATCATAAATTAGTTTATAT	GCTGATGCTGGACATACACCTATATTATTGAAAGCTAGAGATGTTCTGGGAGGAAAGGTCTATATGTTAATTCATAATATATTTTTATATTCGATCATAAATTAGTTTATAT	112	174	Sub	N/A
275	GCTGATGCTGGACATACACCTATATTATTGGAAGCTAGAGATGTTCTGGGAGGAAAGGTCTATATGTTAATTCATAATATATTTTTATATTCGATCATAAATTAGTTTATAT	GCTGATGCTGGACATACACCTATATTATTGGAAGCTAGAGATTTTCTGGGAGGAAAGGTCTATATGTTAATTCATAATATATTTTTATATTCGATCATAAATTAGTTTATAT	112	173	Sub	N/A
276	GCTGATGCTGGACATACACCTATATTATTGGAAGCTAGAGATGTTCTGGGAGGAAAGGTCTATATGTTAATTCATAATATATTTTTATATTCGATCATAAATTAGTTTATAT	GCCGATGCTGGACATACACCTATATTATTGGAAGCTAGAGATGTTCTGGGAGGAAAGGTCTATATGTTAATTCATAATATATTTTTATATTCGATCATAAATTAGTTTATAT	112	173	Sub	N/A
277	GCTGATGCTGGACATACACCTATATTATTGGAAGCTAGAGATGTTCTGGGAGGAAAGGTCTATATGTTAATTCATAATATATTTTTATATTCGATCATAAATTAGTTTATAT	GCTGATGCTGGACATACACCTATATTATTGGAAGCTAGAGAGGTTCTGGGAGGAAAGGTCTATATGTTAATTCATAATATATTTTTATATTCGATCATAAATTAGTTTATAT	112	173	Sub	N/A
278	GCTGATGCTGGACATACACCTATATTATTGGAAGCTAGAGATGTTCTGGGAGGAAAGGTCTATATGTTAATTCATAATATATTTTTATATTCGATCATAAATTAGTTTATAT	GCTGATGCTGGACATACACCTATATTATTGGAAGCTAGAGATGTTCTGGGAGGAAAGGTCTATATGTTAATTCACAATATATTTTTATATTCGATCATAAATTAGTTTATAT	112	172	Sub	N/A
279	GCTGATGCTGGACATACACCTATATTATTGGAAGCTAGAGATGTTCTGGGAGGAAAGGTCTATATGTTAATTCATAATATATTTTTATATTCGATCATAAATTAGTTTATAT	GCTGATGCTGGACATACACCTATATTATTGGAAGCTAGAGATGTTTTAGGAGGAAGGGTC----------TTCATAATATATTTTTATATTTGATCATAAATTAGTTTATAT	102	172	del	N/A
280	GCTGATGCTGGACATACACCTATATTATTGGAAGCTAGAGATGTTCTGGGAGGAAAGGTCTATATGTTAATTCATAATATATTTTTATATTCGATCATAAATTAGTTTATAT	GCTGATGCTGGACATACACCTATATTATTGGAAGCAAGAGATGTTTTAGGAGGAAATGTC----------TTCATAATACATTTTTATATTTGATCATAAATTAGTTTATAT	102	171	del	N/A
281	GCTGATGCTGGACATACACCTATATTATTGGAAGCTAGAGATGTTCTGGGAGGAAAGGTCTATATGTTAATTCATAATATATTTTTATATTCGATCATAAATTAGTTTATAT	GCTGATGCTGGACATACACCTATATTATTGGAAGCTAGAGATGTTCTGGGAGGAAAGGTCTATATGTTAATTCATAATATATTTTTATATTCGATCATAAATTAGTTTATAC	112	168	Sub	N/A
282	GCTGATGCTGGACATACACCTATATTATTGGAAGCTAGAGATGTTCTGGGAGGAAAGGTCTATATGTTAATTCATAATATATTTTTATATTCGATCATAAATTAGTTTATAT	GCTGATGCTGGACATACACCTATATTATTGGAAGCTAGAGATGTTCTGGGAGGAAAGGTCTATATGTTAATTCATAATATATTTTTATATTTGATCATAAATTAGTTTATGT	112	168	Sub	N/A
283	GCTGATGCTGGACATACACCTATATTATTGGAAGCTAGAGATGTTCTGGGAGGAAAGGTCTATATGTTAATTCATAATATATTTTTATATTCGATCATAAATTAGTTTATAT	GCTGATGCTGGACATACACCTATATTATTGGAAGCTAGAGCTGTTTTAGGAGGAAAGGTC----------TTCATAATATATTTTTATATTTGATCATAAATTAGTTTATAT	102	167	del	N/A
284	GCTGATGCTGGACATACACCTATATTATTGGAAGCTAGAGATGTTCTGGGAGGAAAGGTCTATATGTTAATTCATAATATATTTTTATATTCGATCATAAATTAGTTTATAT	GCTGATGCTGGACATACACCTATATTATTGGAAGCTAGAGATGTTTTGGGAGGAAATGTC----------TTCATAATACATTTTTATATTTGATCATAAATTAGTTTATAT	102	166	del	N/A
285	GCTGATGCTGGACATACACCTATATTATTGGAAGCTAGAGATGTTCTGGGAGGAAAGGTCTATATGTTAATTCATAATATATTTTTATATTCGATCATAAATTAGTTTATAT	GCTGATGCTGGACATACACCTATATTATTGGATGCTAGAGATGTTTTAGGAGGAAATGTC----------TTCATAATACATTTTTATATTTGATCATAAATTAGTTTATAT	102	166	del	N/A
286	GCTGATGCTGGACATACACCTATATTATTGGAAGCTAGAGATGTTCTGGGAGGAAAGGTCTATATGTTAATTCATAATATATTTTTATATTCGATCATAAATTAGTTTATAT	GCTGATGCTGGACATACACCTATATTATTGGAAGCTAGAGATGTTCTGGGAGGAAAGGTCTATATGTTAATTCATAATATATTCTTATATTCGATCATAAATTAGTTTATAT	112	165	Sub	N/A
287	GCTGATGCTGGACATACACCTATATTATTGGAAGCTAGAGATGTTCTGGGAGGAAAGGTCTATATGTTAATTCATAATATATTTTTATATTCGATCATAAATTAGTTTATAT	GCTGATGCTGGACATACACCTATATTATTGGAAGCTAGAGATGTTCTGGGAGGAAATGTCTATATGTTAATTCATAATATATTTTTATATTCGATCATAAATTAGTTTATAT	112	164	Sub	N/A
288	GCTGATGCTGGACATACACCTATATTATTGGAAGCTAGAGATGTTCTGGGAGGAAAGGTCTATATGTTAATTCATAATATATTTTTATATTCGATCATAAATTAGTTTATAT	GCTGATGCTGGACATACACCTATATTATTGGAAGGTAGAGATGTTTTAGGAGGAAATGTC----------TTCATAATACATTTTTATATTTGATCATAAATTAGTTTATAT	102	164	del	N/A
289	GCTGATGCTGGACATACACCTATATTATTGGAAGCTAGAGATGTTCTGGGAGGAAAGGTCTATATGTTAATTCATAATATATTTTTATATTCGATCATAAATTAGTTTATAT	GCTGATGCTGGACATACACCTATATTATTGGAAGCTAGAGATGTTCTGGGAGGAAAGGTCTATATGTTAATTCATAATATATTTTTATATTCGATCGTAAATTAGTTTATAT	112	163	Sub	N/A
290	GCTGATGCTGGACATACACCTATATTATTGGAAGCTAGAGATGTTCTGGGAGGAAAGGTCTATATGTTAATTCATAATATATTTTTATATTCGATCATAAATTAGTTTATAT	GCTGATGTTGGACATACACCTATATTATTGGAAGCTAGAGATGTTTTAGGAGGAAATGTC----------TTCATAATACATTTTTATATTTGATCATAAATTAGTTTATAT	102	163	del	N/A
291	GCTGATGCTGGACATACACCTATATTATTGGAAGCTAGAGATGTTCTGGGAGGAAAGGTCTATATGTTAATTCATAATATATTTTTATATTCGATCATAAATTAGTTTATAT	GCTGATGCCGGACATACACCTATATTATTGGAAGCTAGAGATGTTCTGGGAGGAAAGGTCTATATGTTAATTCATAATATATTTTTATATTCGATCATAAATTAGTTTATAT	112	161	Sub	N/A
292	GCTGATGCTGGACATACACCTATATTATTGGAAGCTAGAGATGTTCTGGGAGGAAAGGTCTATATGTTAATTCATAATATATTTTTATATTCGATCATAAATTAGTTTATAT	GCTGATGCTGGACATACACCTATATTATTGGAAGCTAGAGATGTTTTAGGAGGAAAGGTC----------TTCATAGTATATTTTTATATTTGATCATAAATTAGTTTATAT	102	161	del	N/A
293	GCTGATGCTGGACATACACCTATATTATTGGAAGCTAGAGATGTTCTGGGAGGAAAGGTCTATATGTTAATTCATAATATATTTTTATATTCGATCATAAATTAGTTTATAT	GCTGATGCTGGACATACACCTATATTATTGGAAGCTAGGGATGTTTTAGGAGGAAAGGTC----------TTCATAATATATTTTTATATTTGATCATAAATTAGTTTATAT	102	160	del	N/A
294	GCTGATGCTGGACATACACCTATATTATTGGAAGCTAGAGATGTTCTGGGAGGAAAGGTCTATATGTTAATTCATAATATATTTTTATATTCGATCATAAATTAGTTTATAT	GCTGATGCTGGACATACACCTATGTTATTGGAAGCTAGAGATGTTTTAGGAGGAAAGGTC----------TTCATAATATATTTTTATATTTGATCATAAATTAGTTTATAT	102	160	del	N/A
295	GCTGATGCTGGACATACACCTATATTATTGGAAGCTAGAGATGTTCTGGGAGGAAAGGTCTATATGTTAATTCATAATATATTTTTATATTCGATCATAAATTAGTTTATAT	GCTGATGCTGGACATACACCTATAGTATTGGAAGCTAGAGATGTTTTAGGAGGAAAGGTC----------TTCATAATATATTTTTATATTTGATCATAAATTAGTTTATAT	102	160	del	N/A
296	GCTGATGCTGGACATACACCTATATTATTGGAAGCTAGAGATGTTCTGGGAGGAAAGGTCTATATGTTAATTCATAATATATTTTTATATTCGATCATAAATTAGTTTATAT	GCTGATGCTGGACATACACCTATATTATTGGAAGCTAGAGATGTTTTAGGAGGAAATGTC----------TTCATAATATATTTTTGTATTTGATCATAAATTAGTTTATAT	102	160	del	N/A
297	GCTGATGCTGGACATACACCTATATTATTGGAAGCTAGAGATGTTCTGGGAGGAAAGGTCTATATGTTAATTCATAATATATTTTTATATTCGATCATAAATTAGTTTATAT	GCTGATGCTGGACATACACCTATATTATTGGAAGCTAGAGATGTTCTGGGAGGAAAGGTCTATACGTTAATTCATAATATATTTTTATATTCGATCATAAATTAGTTTATAT	112	158	Sub	N/A
298	GCTGATGCTGGACATACACCTATATTATTGGAAGCTAGAGATGTTCTGGGAGGAAAGGTCTATATGTTAATTCATAATATATTTTTATATTCGATCATAAATTAGTTTATAT	GCCGATGCTGGACATACACCTATATTATTGGAAGCTAGAGATGTTTTAGGAGGAAATGTC----------TTCATAATACATTTTTATATTTGATCATAAATTAGTTTATAT	102	158	del	N/A
299	GCTGATGCTGGACATACACCTATATTATTGGAAGCTAGAGATGTTCTGGGAGGAAAGGTCTATATGTTAATTCATAATATATTTTTATATTCGATCATAAATTAGTTTATAT	GCTGATGCTGGACATACACCTATATTATTGGAAGCTAGAGATGTTCTGGGAGGAAAGGTC----------TTCATAATATATTTTTATATTCGATCATAAATTAGTTTATAT	102	157	del	N/A
300	GCTGATGCTGGACATACACCTATATTATTGGAAGCTAGAGATGTTCTGGGAGGAAAGGTCTATATGTTAATTCATAATATATTTTTATATTCGATCATAAATTAGTTTATAT	GCTGATGCTGGACATACACCTATATTATTGGAAGCTAGAGATGTTCTGGGAGGAAAAGTCTATATGTTAATTCATAATATATTTTTATATTCGATCATAAATTAGTTTATAT	112	157	Sub	N/A
301	GCTGATGCTGGACATACACCTATATTATTGGAAGCTAGAGATGTTCTGGGAGGAAAGGTCTATATGTTAATTCATAATATATTTTTATATTCGATCATAAATTAGTTTATAT	GCTGATGCTGGACATACACCTATATTATTGGAAGCTAGAGATGTTCTAGGAGGAAATGTC----------TTCATAATACATTTTTATATTTGATCATAAATTAGTTTATAT	102	157	del	N/A
302	GCTGATGCTGGACATACACCTATATTATTGGAAGCTAGAGATGTTCTGGGAGGAAAGGTCTATATGTTAATTCATAATATATTTTTATATTCGATCATAAATTAGTTTATAT	GCTGATGCTGGACATACACCTATATTATTGGAAGCTAGAGATGTTGTAGGAGGAAAGGTC----------TTCATAATATATTTTTATATTTGATCATAAATTAGTTTATAT	102	157	del	N/A
303	GCTGATGCTGGACATACACCTATATTATTGGAAGCTAGAGATGTTCTGGGAGGAAAGGTCTATATGTTAATTCATAATATATTTTTATATTCGATCATAAATTAGTTTATAT	GCTGATGCTGGACATACACCTATATTGTTGGAAGCTAGAGATGTTCTGGGAGGAAAGGTCTATATGTTAATTCATAATATATTTTTATATTCGATCATAAATTAGTTTATAT	112	156	Sub	N/A
304	GCTGATGCTGGACATACACCTATATTATTGGAAGCTAGAGATGTTCTGGGAGGAAAGGTCTATATGTTAATTCATAATATATTTTTATATTCGATCATAAATTAGTTTATAT	GCTGATGCTGGACATACACCTATATTATTGGAAGCTAGAGATGTTTTAGGAGGAAATGTC----------TTCATAATACATTTTTATATTTGATCATTAATTAGTTTATAT	102	156	del	N/A
305	GCTGATGCTGGACATACACCTATATTATTGGAAGCTAGAGATGTTCTGGGAGGAAAGGTCTATATGTTAATTCATAATATATTTTTATATTCGATCATAAATTAGTTTATAT	GCTGATGCTGGACATACACCTATATTATTGGAAGCTAGAGATGTTTTAGGAGGAGAGGTC----------TTCATAATATATTTTTATATTTGATCATAAATTAGTTTATAT	102	156	del	N/A
306	GCTGATGCTGGACATACACCTATATTATTGGAAGCTAGAGATGTTCTGGGAGGAAAGGTCTATATGTTAATTCATAATATATTTTTATATTCGATCATAAATTAGTTTATAT	GCTGATGCTGGACATACACCTCTATTATTGGAAGCTAGAGATGTTTTAGGAGGAAATGTC----------TTCATAATACATTTTTATATTTGATCATAAATTAGTTTATAT	102	156	del	N/A
307	GCTGATGCTGGACATACACCTATATTATTGGAAGCTAGAGATGTTCTGGGAGGAAAGGTCTATATGTTAATTCATAATATATTTTTATATTCGATCATAAATTAGTTTATAT	GCTGATGCTGGACATACACCTATATTATTGGAAGCTAGAGATGTTTTAGGGGGAAATGTC----------TTCATAATACATTTTTATATTTGATCATAAATTAGTTTATAT	102	154	del	N/A
308	GCTGATGCTGGACATACACCTATATTATTGGAAGCTAGAGATGTTCTGGGAGGAAAGGTCTATATGTTAATTCATAATATATTTTTATATTCGATCATAAATTAGTTTATAT	GCTGATGCTGGACATACACCTATATTATCGGAAGCTAGAGATGTTTTAGGAGGAAAGGTC----------TTCATAATATATTTTTATATTTGATCATAAATTAGTTTATAT	102	153	del	N/A
309	GCTGATGCTGGACATACACCTATATTATTGGAAGCTAGAGATGTTCTGGGAGGAAAGGTCTATATGTTAATTCATAATATATTTTTATATTCGATCATAAATTAGTTTATAT	GCTGATGCTGGACATACACCTATATTATTGGAAGCTAGAGATGTTTTAGGAGGAAATGTC----------TCCATAATACATTTTTATATTTGATCATAAATTAGTTTATAT	102	153	del	N/A
310	GCTGATGCTGGACATACACCTATATTATTGGAAGCTAGAGATGTTCTGGGAGGAAAGGTCTATATGTTAATTCATAATATATTTTTATATTCGATCATAAATTAGTTTATAT	GCTGATGCTGGACATACACCTATGTTATTGGAAGCTAGAGATGTTTTAGGAGGAAATGTC----------TTCATAATACATTTTTATATTTGATCATAAATTAGTTTATAT	102	152	del	N/A
311	GCTGATGCTGGACATACACCTATATTATTGGAAGCTAGAGATGTTCTGGGAGGAAAGGTCTATATGTTAATTCATAATATATTTTTATATTCGATCATAAATTAGTTTATAT	GCTGATGCTGGACATACACCTATATTATTGGAAGCTAGAGATGTTTTAGGAGGAAAGGT----------TTTCATAATATATTTTTATATTTGATCATAAATTAGTTTATAT	102	152	del	N/A
312	GCTGATGCTGGACATACACCTATATTATTGGAAGCTAGAGATGTTCTGGGAGGAAAGGTCTATATGTTAATTCATAATATATTTTTATATTCGATCATAAATTAGTTTATAT	GCTGATGCTGGACATACACTTATATTATTGGAAGCTAGAGATGTTTTAGGAGGAAATGTC----------TTCATAATACATTTTTATATTTGATCATAAATTAGTTTATAT	102	152	del	N/A
313	GCTGATGCTGGACATACACCTATATTATTGGAAGCTAGAGATGTTCTGGGAGGAAAGGTCTATATGTTAATTCATAATATATTTTTATATTCGATCATAAATTAGTTTATAT	GCTGATGCTGGACATACACCTATATTATTGGAAGCTAGAGATGTTCTGGGAGGAAAGGTCTATATGTTAATTCATAATATATTTTTATATTCGACCATAAATTAGTTTATAT	112	151	Sub	N/A
314	GCTGATGCTGGACATACACCTATATTATTGGAAGCTAGAGATGTTCTGGGAGGAAAGGTCTATATGTTAATTCATAATATATTTTTATATTCGATCATAAATTAGTTTATAT	GCTGATGCTGGACATACACCTATATTATTGGAAGCTAGAGATGTTTTAGGAGGGAAGGTC----------TTCATAATATATTTTTATATTTGATCATAAATTAGTTTATAT	102	150	del	N/A
315	GCTGATGCTGGACATACACCTATATTATTGGAAGCTAGAGATGTTCTGGGAGGAAAGGTCTATATGTTAATTCATAATATATTTTTATATTCGATCATAAATTAGTTTATAT	GCTGATGCTGGACATACACCTATATTATTGGAAGCTAGAGATGTTCTGGGAAGAAAGGTCTATATGTTAATTCATAATATATTTTTATATTCGATCATAAATTAGTTTATAT	112	149	Sub	N/A
316	GCTGATGCTGGACATACACCTATATTATTGGAAGCTAGAGATGTTCTGGGAGGAAAGGTCTATA---TGTTAATTCATAATATATTTTT--------ATATTCGATCATAAATTAGTTTATAT	GCTGAGGCTGGACATACACCTATATTATTGGAAGCTAGAGATGTTCTGGGGGGAAAGGTCTATATACTGTT-ATTCATAATA---TTTTCGAACACAATATTTGATCATAAATTAGTTTATAT	119	149	Ins	N/A
317	GCTGATGCTGGACATACACCTATATTATTGGAAGCTAGAGATGTTCTGGGAGGAAAGGTCTATATGTTAATTCATAATATATTTTTATATTCGATCATAAATTAGTTTATAT	GCTGATGCTGGACATACACCTATAGTATTGGAAGCTAGAGATGTTTTAGGAGGAAATGTC----------TTCATAATACATTTTTATATTTGATCATAAATTAGTTTATAT	102	149	del	N/A
318	#NAME?	GCTGATGCTGGACATACACCGCTGATGCTGGACATACACCTATATTATTGGAAGCTAGAGATGTTTTAGGAGGAAATGTC----------TTCATAATATATTTTTATATTTGATCATAAATTAGTTTATAT	122	148	Ins	N/A
319	GCTGATGCTGGACATACACCTATATTATTGGAAGCTAGAGATGTTCTGGGAGGAAAGGTCTATATGTTAATTCATAATATATTTTTATATTCGATCATAAATTAGTTTATAT	GCTGATGCTGGACATACACCTATATAATTGGAAGCTAGAGATGTTCTGGGAGGAAAGGTCTATATGTTAATTCATAATATATTTTTATATTCGATCATAAATTAGTTTATAT	112	147	Sub	N/A
320	GCTGATGCTGGACATACACCTATATTATTGGAAGCTAGAGATGTTCTGGGAGGAAAGGTCTATATGTTAATTCATAATATATTTTTATATTCGATCATAAATTAGTTTATAT	GCTGATGCTGGACATACACCTATATTATTGGAAGCTAGAGATGTTTTAGGAGGAAAGGTC----------TCCATAATATATTTTTATATTTGATCATAAATTAGTTTATAT	102	146	del	N/A
321	GCTGATGCTGGACATACACCTATATTATTGGAAGCTAGAGATGTTCTGGGAGGAAAGGTCTATATGTTAATTCATAATATATTTTTATATTCGATCATAAATTAGTTTATAT	GCTGATGCTGGACATACACATATATTATTGGAAGCTAGAGATGTTCTGGGAGGAAAGGTCTATATGTTAATTCATAATATATTTTTATATTCGATCATAAATTAGTTTATAT	112	146	Sub	N/A
322	GCTGATGCTGGACATACACCTATATTATTGGAAGCTAGAGATGTTCTGGGAGGAAAGGTCTATATGTTAATTCATAATATATTTTTATATTCGATCATAAATTAGTTTATAT	GCTGATGCTGGACTTACACCTATATTATTGGAAGCTAGAGATGTTTTAGGAGGAAATGTC----------TTCATAATATATTTTTATATTTGATCATAAATTAGTTTATAT	102	146	del	N/A
323	GCTGATGCTGGACATACACCTATATTATTGGAAGCTAGAGATGTTCTGGGAGGAAAGGTCTATATGTTAATTCATAATATATTTTTATATTCGATCATAAATTAGTTTATAT	GCTGATGCTGGACATACACCTATATTATCGGAAGCTAGAGATGTTTTAGGAGGAAATGTC----------TTCATAATACATTTTTATATTTGATCATAAATTAGTTTATAT	102	145	del	N/A
324	GCTGATGCTGGACATACACCTATATTATTGGAAGCTAGAGATGTTCTGGGAGGAAAGGTCTATA---TGTTAATTCATAATATATTTTT--------ATATTCGATCATAAATTAGTTTATAT	GCTGATGCTGGACTTACACCTATATTATTGGAAGCTAGAGATGTTCTGGGGGGAAAGGTCTATATACTGTT-ATTCATAATA---TTTTCGAACACAATATTTGATCATAAATTAGTTTATAT	119	145	Ins	N/A
325	GCTGATGCTGGACATACACCTATATTATTGGAAGCTAGAGATGTTCTGGGAGGAAAGGTCTATATGTTAATTCATAATATATTTTTATATTCGATCATAAATTAGTTTATAT	GCTGATGCTGGACATACACCTATATTATTGGAAGCTAGAGATGTTTTAGGAGGAAAGGTCTATATGTTAATTCATAATATATTTTTATATTTGATCATAAATTAGTTTATAT	112	145	Sub	N/A
326	GCTGATGCTGGACATACACCTATATTATTGGAAGCTAGAGATGTTCTGGGAGGAAAGGTCTATATGTTAATTCATAATATATTTTTATATTCGATCATAAATTAGTTTATAT	GCTGATGCTGGACATACACCTATATTATTGGAAGCTAGAGATGTTCTGGGAGGAAATGTC----------TTCATAATATATTTTTATATTTGATCATAAATTAGTTTATAT	102	144	del	N/A
327	GCTGATGCTGGACATACACCTATATTATTGGAAGCTAGAGATGTTCTGGGAGGAAAGGTCTATATGTTAATTCATAATATATTTTTATATTCGATCATAAATTAGTTTATAT	GCTGATGCTGGACATACACCTATATTATTGGAAGCTAGAGATGTTCTGGGAGGAAAGGTCTATGTGTTAATTCATAATATATTTTTATATTCGATCATAAATTAGTTTATAT	112	143	Sub	N/A
328	GCTGATGCTGGACATACACCTATATTATTGGAAGCTAGAGATGTTCTGGGAGGAAAGGTCTATATGTTAATTCATAATATATTTTTATATTCGATCATAAATTAGTTTATAT	GCTGATGCTGGACATACACCTATATTATTGGAAGCTAGAGATGTTCTGGGAGGAAAGGTCTATATGTTAATTCATAATACATTTTTATATTTGATCATAAATTAGTTTATAT	112	143	Sub	N/A
329	GCTGATGCTGGACATACACCTATATTATTGGAAGCTAGAGATGTTCTGGGAGGAAAGGTCTATATGTTAATTCATAATATATTTTTATATTCGATCATAAATTAGTTTATAT	GCTGATGCTGGACATACACCTATATAATTGGAAGCTAGAGATGTTTTAGGAGGAAAGGTC----------TTCATAATATATTTTTATATTTGATCATAAATTAGTTTATAT	102	142	del	N/A
330	GCTGATGCTGGACATACACCTATATTATTGGAAGCTAGAGATGTTCTGGGAGGAAAGGTCTATATGTTAATTCATAATATATTTTTATATTCGATCATAAATTAGTTTATAT	GCTGATGCTGGACATACACCTATATTATTGGAAGCTAGAGATGTTCTGGGAGGAAAGGTCTATATGTTAATTCATAATATATTTTTATATCCGATCATAAATTAGTTTATAT	112	142	Sub	N/A
331	GCTGATGCTGGACATACACCTATATTATTGGAAGCTAGAGATGTTCTGGGAGGAAAGGTCTATATGTTAATTCATAATATATTTTTATATTCGATCATAAATTAGTTTATAT	GCTGATGCTGGACATACACCTATATTATTGGAACCTAGAGATGTTCTGGGAGGAAAGGTCTATATGTTAATTCATAATATATTTTTATATTCGATCATAAATTAGTTTATAT	112	142	Sub	N/A
332	GCTGATGCTGGACATACACCTATATTATTGGAAGCTAGAGATGTTCTGGGAGGAAAGGTCTATATGTTAATTCATAATATATTTTTATATTCGATCATAAATTAGTTTATAT	GCTGATGCTGGACATACACATATATTATTGGAAGCTAGAGATGTTTTAGGAGGAAAGGTC----------TTCATAATATATTTTTATATTTGATCATAAATTAGTTTATAT	102	142	del	N/A
333	GCTGATGCTGGACATACACCTATATTATTGGAAGCTAGAGATGTTCTGGGAGGAAAGGTCTATATGTTAATTCATAATATATTTTTATATTCGATCATAAATTAGTTTATAT	GCTGATGCTGGACATACACCTATATTATTGGAAGCTAGAGATGTTCTGGGAGGAAAGGTCTATATGTTAACTCATAATATATTTTTATATTCGATCATAAATTAGTTTATAT	112	141	Sub	N/A
334	GCTGATGCTGGACATACACCTATATTATTGGAAGCTAGAGATGTTCTGGGAGGAAAGGTCTATATGTTAATTCATAATATATTTTTATATTCGATCATAAATTAGTTTATAT	GCTGATGCTGGACATACACCTATATTATTGGAAGCTAGAGATGTTCTGGGAGGAAAGATCTATATGTTAATTCATAATATATTTTTATATTCGATCATAAATTAGTTTATAT	112	141	Sub	N/A
335	GCTGATGCTGGACATACACCTATATTATTGGAAGCTAGAGATGTTCTGGGAGGAAAGGTCTATATGTTAATTCATAATATATTTTTATATTCGATCATAAATTAGTTTATAT	GCTGATGCTGGACATACACCTATATTATTGGAAGCTAGAGATGTTCTGGGAGGAAAGGTCTATATGTTAATTCATAATACATTTTTATATTCGATCATAAATTAGTTTATAT	112	141	Sub	N/A
336	GCTGATGCTGGACATACACCTATATTATTGGAAGCTAGAGATGTTCTGGGAGGAAAGGTCTATATGTTAATTCATAATATATTTTTATATTCGATCATAAATTAGTTTATAT	GCTGATGCTGGACATACACCTATATTATTGGAAGCTAGAGATGTTCTGGGAGGAAAGGTTTATATGTTAATTCATAATATATTTTTATATTCGATCATAAATTAGTTTATAT	112	141	Sub	N/A
337	GCTGATGCTGGACATACACCTATATTATTGGAAGCTAGAGATGTTCTGGGAGGAAAGGTCTATATGTTAATTCATAATATATTTTTATATTCGATCATAAATTAGTTTATAT	TCTGATGCTGGACATACACCTATATTATTGGAAGCTAGAGATGTTTTAGGAGGAAATGTC----------TTCATAATACATTTTTATATTTGATCATAAATTAGTTTATAT	102	140	del	N/A
338	GCTGATGCTGGACATACACCTATATTATTGGAAGCTAGAGATGTTCTGGGAGGAAAGGTCTATATGTTAATTCATAATATATTTTTATATTCGATCATAAATTAGTTTATAT	GCTGATGCTGGACATACACCTATATTATTGGAAGCTAGAGATGTTCTAGGAGGAAAGGTC----------TTCATAATATATTTTTATATTTGATCATAAATTAGTTTATAT	102	140	del	N/A
339	GCTGATGCTGGACATACACCTATATTATTGGAAGCTAGAGATGTTCTGGGAGGAAAGGTCTATATGTTAATTCATAATATATTTTTATATTCGATCATAAATTAGTTTATAT	GCTGATGCTGGACATACACCTATATTATTGGAAGCTAGAGATGTTCTGGGAGGAAAGGTCTATATGTTAATTCATAATATACTTTTATATTCGATCATAAATTAGTTTATAT	112	139	Sub	N/A
340	GCTGATGCTGGACATACACCTATATTATTGGAAGCTAGAGATGTTCTGGGAGGAAAGGTCTATATGTTAATTCATAATATATTTTTATATTCGATCATAAATTAGTTTATAT	GCTGATGCTGGACATACACCTATATTATTGGAAGCTAGAGTTGTTCTGGGAGGAAAGGTCTATATGTTAATTCATAATATATTTTTATATTCGATCATAAATTAGTTTATAT	112	138	Sub	N/A
341	GCTGATGCTGGACATACACCTATATTATTGGAAGCTAGAGATGTTCTGGGAGGAAAGGTCTATATGTTAATTCATAATATATTTTTATATTCGATCATAAATTAGTTTATAT	GCTGATGCTGGACATACACCTATATTATTGGAAGCTAGAGATGTTCTGGGAGAAAAGGTCTATATGTTAATTCATAATATATTTTTATATTCGATCATAAATTAGTTTATAT	112	136	Sub	N/A
342	GCTGATGCTGGACATACACCTATATTATTGGAAGCTAGAGATGTTCTGGGAGGAAAGGTCTATATGTTAATTCATAATATATTTTTATATTCGATCATAAATTAGTTTATAT	GCTGATGCTGGACATACACCTATATTATTGGAAGCTAGAGATGTTTTAGGAGGAAAGCTC----------TTCATAATATATTTTTATATTTGATCATAAATTAGTTTATAT	102	136	del	N/A
343	GCTGATGCTGGACATACACCTATATTATTGGAAGCTAGAGATGTTCTGGGAGGAAAGGTCTATATGTTAATTCATAATATATTTTTATATTCGATCATAAATTAGTTTATAT	GCTGATGCTGGACATACACCTATATTATTGGAAGCTAGAGATGTTCTGGGAGGAAAGGTCTATATGTTAATTCATAGTATATTTTTATATTCGATCATAAATTAGTTTATAT	112	136	Sub	N/A
344	GCTGATGCTGGACATACACCTATATTATTGGAAGCTAGAGATGTTCTGGGAGGAAAGGTCTATATGTTAATTCATAATATATTTTTATATTCGATCATAAATTAGTTTATAT	GCTGATGCTGGACATACACCTATATTATTGGAAGCTAGGGATGTTTTAGGAGGAAATGTC----------TTCATAATACATTTTTATATTTGATCATAAATTAGTTTATAT	102	135	del	N/A
345	GCTGATGCTGGACATACACCTATATTATTGGAAGCTAGAGATGTTCTGGGAGGAAAGGTCTATATGTTAATTCATAATATATTTTTATATTCGATCATAAATTAGTTTATAT	GCTGATGCTGGACATACACCTATATTATTGGAAGCTAGAGATGTTTTAGGAGGAAATGTC----------TTCATAATACATTTTTATATTTGATCATGAATTAGTTTATAT	102	135	del	N/A
346	GCTGATGCTGGACATACACCTATATTATTGGAAGCTAGAGATGTTCTGGGAGGAAAGGTCTATATGTTAATTCATAATATATTTTTATATTCGATCATAAATTAGTTTATAT	GCTGATGCTGGACATACACCTATATTATTGGAAGCTAGAGATGTTCTGGGAGGAAAGGTCTATATGTTAATTCATAATATATTTTTATATTCTATCATAAATTAGTTTATAT	112	135	Sub	N/A
347	GCTGATGCTGGACATACACCTATATTATTGGAAGCTAGAGATGTTCTGGGAGGAAAGGTCTATATGTTAATTCATAATATATTTTTATATTCGATCATAAATTAGTTTATAT	GCTGATGCTGGACATACACCTATATTATTGGAAGCTAGAGATGTTTTAAGAGGAAATGTC----------TTCATAATACATTTTTATATTTGATCATAAATTAGTTTATAT	102	134	del	N/A
348	GCTGATGCTGGACATACACCTATATTATTGGAAGCTAGAGATGTTCTGGGAGGAAAGGTCTATATGTTAATTCATAATATATTTTTATATTCGATCATAAATTAGTTTATAT	GCTGATGCTGGACATACACCTATATTATTGGAAGCTAGAGATGTTTTAGGAGGAAATGTC----------CTCATAATACATTTTTATATTTGATCATAAATTAGTTTATAT	102	133	del	N/A
349	GCTGATGCTGGACATACACCTATATTATTGGAAGCTAGAGATGTTCTGGGAGGAAAGGTCTATA---TGTTAATTCATAATATATTTTT--------ATATTCGATCATAAATTAGTTTATAT	GCTGATGCTGGACATACACCTATATTATTGGAAGCTAGAGATGTTCTGGGGGGGAAGGTCTATATACTGTT-ATTCATAATA---TTTTCGAACACAATATTTGATCATAAATTAGTTTATAT	119	132	Ins	N/A
350	GCTGATGCTGGACATACACCTATATTATTGGAAGCTAGAGATGTTCTGGGAGGAAAGGTCTATATGTTAATTCATAATATATTTTTATATTCGATCATAAATTAGTTTATAT	GCTGATGCTGGACATACACCTATATTATTGGAAGCTAGAGATGTTTTAGGAGGAAAGATC----------TTCATAATATATTTTTATATTTGATCATAAATTAGTTTATAT	102	132	del	N/A
351	GCTGATGCTGGACATACACCTATATTATTGGAAGCTAGAGATGTTCTGGGAGGAAAGGTCTATATGTTAATTCATAATATATTTTTATATTCGATCATAAATTAGTTTATAT	GCTGATGCTGGACATACACCTATATTATTGGAAGCTAGAGATGTTCTGGGAGGAAAGGTCTATATGTTAATTCATAATATATCTTTATATTCGATCATAAATTAGTTTATAT	112	131	Sub	N/A
352	GCTGATGCTGGACATACACCTATATTATTGGAAGCTAGAGATGTTCTGGGAGGAAAGGTCTATATGTTAATTCATAATATATTTTTATATTCGATCATAAATTAGTTTATAT	GCTGATGCTGGACATACACCTATATTATTGGAAGCTAGAGATGTTTTAGGAGGAAATGTC----------TTCATAATACATTGTTATATTTGATCATAAATTAGTTTATAT	102	131	del	N/A
353	GCTGATGCTGGACATACACCTATATTATTGGAAGCTAGAGATGTTCTGGGAGGAAAGGTCTATATGTTAATTCATAATATATTTTTATATTCGATCATAAATTAGTTTATAT	GCTGATGCTGGACATACACCTATATTATTGGAAGCTAGAGATGTTTTAGGAGGAAATGTC----------TTCATAATACATTTTTACATTTGATCATAAATTAGTTTATAT	102	131	del	N/A
354	GCTGATGCTGGACATACACCTATATTATTGGAAGCTAGAGATGTTCTGGGAGGAAAGGTCTATATGTTAATTCATAATATATTTTTATATTCGATCATAAATTAGTTTATAT	GCTGATGCTGGACATACACCTATATTATTGGAAGCTAGAGGTGTTTTAGGAGGAAAGGTC----------TTCATAATATATTTTTATATTTGATCATAAATTAGTTTATAT	102	131	del	N/A
355	GCTGATGCTGGACATACACCTATATTATTGGAAGCTAGAGATGTTCTGGGAGGAAAGGTCTATATGTTAATTCATAATATATTTTTATATTCGATCATAAATTAGTTTATAT	GCTGATGCTGGACATACACCTATATTATTGGAAGCTAGAGATCTTCTGGGAGGAAAGGTCTATATGTTAATTCATAATATATTTTTATATTCGATCATAAATTAGTTTATAT	112	131	Sub	N/A
356	GCTGATGCTGGACATACACCTATATTATTGGAAGCTAGAGATGTTCTGGGAGGAAAGGTCTATATGTTAATTCATAATATATTTTTATATTCGATCATAAATTAGTTTATAT	GCTGATGCTGGACATACACCTATATTATTGGAAGCTAGAGATGTTCTGGGAGGAAAGGTC----------TTCATAATATATTTTTGTATTTGATCATAAATTAGTTTATAT	102	130	del	N/A
357	GCTGATGCTGGACATACACCTATATTATTGGAAGCTAGAGATGTTCTGGGAGGAAAGGTCTATATGTTAATTCATAATATATTTTTATATTCGATCATAAATTAGTTTATAT	GCTGATGCTGGACATACACCTATATTATTGGAAGCTAGAGATGTTCTGGGAGGAAAGGTCTATATGTTAATTCGTAATATATTTTTATATTCGATCATAAATTAGTTTATAT	112	129	Sub	N/A
358	GCTGATGCTGGACATACACCTATATTATTGGAAGCTAGAGATGTTCTGGGAGGAAAGGTCTATATGTTAATTCATAATATATTTTTATATTCGATCATAAATTAGTTTATAT	GCTGATGCTGGACATACACCTATATTATTGGAAGCTAGAGATGTTCTGGGAGGAAAGGTCTATCTGTTAATTCATAATATATTTTTATATTCGATCATAAATTAGTTTATAT	112	129	Sub	N/A
359	GCTGATGCTGGACATACACCTATATTATTGGAAGCTAGAGATGTTCTGGGAGGAAAGGTCTATATGTTAATTCATAATATATTTTTATATTCGATCATAAATTAGTTTATAT	GCTGATGCTGGACATACACCTATATTATTGGAAGCTGGAGATGTTCTGGGAGGAAAGGTCTATATGTTAATTCATAATATATTTTTATATTCGATCATAAATTAGTTTATAT	112	129	Sub	N/A
360	GCTGATGCTGGACATACACCTATATTATTGGAAGCTAGAGATGTTCTGGGAGGAAAGGTCTATATGTTAATTCATAATATATTTTTATATTCGATCATAAATTAGTTTATAT	GCTGATGCTGGACATACATCTATATTATTGGAAGCTAGAGATGTTCTGGGAGGAAAGGTCTATATGTTAATTCATAATATATTTTTATATTCGATCATAAATTAGTTTATAT	112	129	Sub	N/A
361	GCTGATGCTGGACATACACCTATATTATTGGAAGCTAGAGATGTTCTGGGAGGAAAGGTCTATATGTTAATTCATAATATATTTTTATATTCGATCATAAATTAGTTTATAT	GCTGATGCTGGACATACACCTATATTATTGGAAGCTAGAGATGTTCTTGGAGGAAAGGTCTATATGTTAATTCATAATATATTTTTATATTCGATCATAAATTAGTTTATAT	112	129	Sub	N/A
362	GCTGATGCTGGACATACACCTATATTATTGGAAGCTAGAGATGTTCTGGGAGGAAAGGTCTATATGTTAATTCATAATATATTTTTATATTCGATCATAAATTAGTTTATAT	GCTGATGCTGGACATACACATATATTATTGGAAGCTAGAGATGTTTTAGGAGGAAATGTC----------TTCATAATACATTTTTATATTTGATCATAAATTAGTTTATAT	102	128	del	N/A
363	GCTGATGCTGGACATACACCTATATTATTGGAAGCTAGAGATGTTCTGGGAGGAAAGGTCTATATGTTAATTCATAATATATTTTTATATTCGATCATAAATTAGTTTATAT	GCTGATGCTGGACATACACCTATATTATTGGAAGCTAGAGATGTTCTGGGAGGAAAGGTCTATATGTTAATTCATAATATATGTTTATATTCGATCATAAATTAGTTTATAT	112	127	Sub	N/A
364	GCTGATGCTGGACATACACCTATATTATTGGAAGCTAGAGATGTTCTGGGAGGAAAGGTCTATATGTTAATTCATAATATATTTTTATATTCGATCATAAATTAGTTTATAT	GCTGATGCTGGACATACACCTATATTATTGGAAGCTAGAGATGTTCTGGGAGGAAAGGTCTATATGTTAATTCATAATATATTTTTATATTCGATCATAAATTAGTCTATAT	112	126	Sub	N/A
365	GCTGATGCTGGACATACACCTATATTATTGGAAGCTAGAGATGTTCTGGGAGGAAAGGTCTATATGTTAATTCATAATATATTTTTATATTCGATCATAAATTAGTTTATAT	GCTGATGCTGGACATACACCTATATTATTGGAAGCTAGAGATGTTTTAGGAGGAAATGTC----------TTCATAATACATTTTTATATTTGATCATAGATTAGTTTATAT	102	125	del	N/A
366	GCTGATGCTGGACATACACCTATATTATTGGAAGCTAGAGATGTTCTGGGAGGAAAGGTCTATATGTTAATTCATAATATATTTTTATATTCGATCATAAATTAGTTTATAT	GCTGATGCTGGACATACACGTATATTATTGGAAGCTAGAGATGTTTTAGGAGGAAAGGTC----------TTCATAATATATTTTTATATTTGATCATAAATTAGTTTATAT	102	125	del	N/A
367	GCTGATGCTGGACATACACCTATATTATTGGAAGCTAGAGATGTTCTGGGAGGAAAGGTCTATATGTTAATTCATAATATATTTTTATATTCGATCATAAATTAGTTTATAT	GCTGATGCTGGACATACACCTATACTATTGGAAGCTAGAGATGTTTTAGGAGGAAAGGTCTATATGTTAATTCATAATATATTTTTATATTCGATCATAAATTAGTTTATAT	112	124	Sub	N/A
368	GCTGATGCTGGACATACACCTATATTATTGGAAGCTAGAGATGTTCTGGGAGGAAAGGTCTATATGTTAATTCATAATATATTTTTATATTCGATCATAAATTAGTTTATAT	GCTGATGCTGGACATACACCTATATTATTGGAAGCTAGAGATGTTCTGGGAGGAAAGGTCTATATGTTAATTCATAATATATTTTTATATTCGATCATAAATTAGTTTATGT	112	124	Sub	N/A
369	GCTGATGCTGGACATACACCTATATTATTGGAAGCTAGAGATGTTCTGGGAGGAAAGGTCTATATGTTAATTCATAATATATTTTTATATTCGATCATAAATTAGTTTATAT	GCTGATGCTGGACATACACCTATATTATTGGAAGCTAGAGATGTTCTGGGAGGAAAGGTCTACATGTTAATTCATAATATATTTTTATATTCGATCATAAATTAGTTTATAT	112	123	Sub	N/A
370	GCTGATGCTGGACATACACCTATATTATTGGAAGCTAGAGATGTTCTGGGAGGAAAGGTCTATATGTTAATTCATAATATATTTTTATATTCGATCATAAATTAGTTTATAT	GCTGATGCTGGACATACACCTATATTATTGGAAGCTAGAGATGTTCTGGGAGGAAAGGTCTATATGTTAATTCATAATATATTTTTATATTCGATCATAAATTGGTTTATAT	112	122	Sub	N/A
371	GCTGATGCTGGACATACACCTATATTATTGGAAGCTAGAGATGTTCTGGGAGGAAAGGTCTATATGTTAATTCATAATATATTTTTATATTCGATCATAAATTAGTTTATAT	GCTGATGCTGGACATACACCTATATTATTGGAAGCTAGAGATGTTTTAGGAGGAAAGGCC----------TTCATAATATATTTTTATATTTGATCATAAATTAGTTTATAT	102	122	del	N/A
372	GCTGATGCTGGACATACACCTATATTATTGGAAGCTAGAGATGTTCTGGGAGGAAAGGTCTATA---TGTTAATTCATAATATATTTTT--------ATATTCGATCATAAATTAGTTTATAT	GCTGATGCTGGACATACACCTATATTATTGGAAGCTAGAGATGTTCTGGGGGGAAAGGTCTATATACTGTT-ATTCATAATA---TTTTCGAACACAATATTTGATCATAAGTTAGTTTATAT	119	122	Ins	N/A
373	GCTGATGCTGGACATACACCTATATTATTGGAAGCTAGAGATGTTCTGGGAGGAAAGGTCTATATGTTAATTCATAATATATTTTTATATTCGATCATAAATTAGTTTATAT	GCTGATGCTGGACATACACCTATATTGTTGGAAGCTAGAGATGTTTTAGGAGGAAAGGTC----------TTCATAATATATTTTTATATTTGATCATAAATTAGTTTATAT	102	121	del	N/A
374	GCTGATGCTGGACATACACCTATATTATTGGAAGCTAGAGATGTTCTGGGAGGAAAGGTCTATATGTTAATTCATAATATATTTTTATATTCGATCATAAATTAGTTTATAT	GCTGATGCTGGACACACACCTATATTATTGGAAGCTAGAGATGTTCTGGGAGGAAAGGTCTATATGTTAATTCATAATATATTTTTATATTCGATCATAAATTAGTTTATAT	112	121	Sub	N/A
375	GCTGATGCTGGACATACACCTATATTATTGGAAGCTAGAGATGTTCTGGGAGGAAAGGTCTATATGTTAATTCATAATATATTTTTATATTCGATCATAAATTAGTTTATAT	GCTGATGCTGGACATACACCTATATTATTGGAAGCTAGAGATGTTTTAGGAGGAAATGTC----------TTCATAATACATTTTTATATTTTATCATAAATTAGTTTATAT	102	121	del	N/A
376	GCTGATGCTGGACATACACCTATATTATTGGAAGCTAGAGATGTTCTGGGAGGAAAGGTCTATATGTTAATTCATAATATATTTTTATATTCGATCATAAATTAGTTTATAT	GCTGATGCTGGACATACACCTATATTATTGGAAGCTAGAGATGTTTTAGGAGGAAAGGTC----------GTCATAATATATTTTTATATTTGATCATAAATTAGTTTATAT	102	120	del	N/A
377	GCTGATGCTGGACATACACCTATATTATTGGAAGCTAGAGATGTTCTGGGAGGAAAGGTCTATATGTTAATTCATAATATATTTTTATATTCGATCATAAATTAGTTTATAT	GCTGATGCTGGACATACACCTATATTATTGGAAGCTAGAGATGTTTTAGGAGGAAATGTC----------TTCATAATACATTTTTATATTTAATCATAAATTAGTTTATAT	102	119	del	N/A
378	GCTGATGCTGGACATACACCTATATTATTGGAAGCTAGAGATGTTCTGGGAGGAAAGGTCTATATGTTAATTCATAATATATTTTTATATTCGATCATAAATTAGTTTATAT	GCTGATGCTGGACATACACCTATATTATTGGAAGCTAGAGATGTTCTGGGAGGAAAGGTCTATATGTTAATTCATAATATATTTTCATATTCGATCATAAATTAGTTTATAT	112	119	Sub	N/A
379	GCTGATGCTGGACATACACCTATATTATTGGAAGCTAGAGATGTTCTGGGAGGAAAGGTCTATATGTTAATTCATAATATATTTTTATATTCGATCATAAATTAGTTTATAT	GCTGATGCTGGACATACACGTATATTATTGGAAGCTAGAGATGTTTTAGGAGGAAATGTC----------TTCATAATACATTTTTATATTTGATCATAAATTAGTTTATAT	102	119	del	N/A
380	GCTGATGCTGGACATACACCTATATTATTGGAAGCTAGAGATGTTCTGGGAGGAAAGGTCTATATGTTAATTCATAATATATTTTTATATTCGATCATAAATTAGTTTATAT	GCTGATGCTGGACATACACCTATATTATTGGAAGCTAGAGATGTTCTGGGAGGAAAGGTCTATATGTTAATTGATAATATATTTTTATATTCGATCATAAATTAGTTTATAT	112	119	Sub	N/A
381	GCTGATGCTGGACATACACCTATATTATTGGAAGCTAGAGATGTTCTGGGAGGAAAGGTCTATATGTTAATTCATAATATATTTTTATATTCGATCATAAATTAGTTTATAT	GCTGATGCCGGACATACACCTATATTATTGGAAGCTAGAGATGTTTTAGGAGGAAAGGTC----------TTCATAATATATTTTTATATTTGATCATAAATTAGTTTATAT	102	118	del	N/A
382	GCTGATGCTGGACATACACCTATATTATTGGAAGCTAGAGATGTTCTGGGAGGAAAGGTCTATATGTTAATTCATAATATATTTTTATATTCGATCATAAATTAGTTTATAT	GCTGATGCTGGACATACACCTATATTGTTGGAAGCTAGAGATGTTTTAGGAGGAAATGTC----------TTCATAATACATTTTTATATTTGATCATAAATTAGTTTATAT	102	118	del	N/A
383	GCTGATGCTGGACATACACCTATATTATTGGAAGCTAGAGATGTTCTGGGAGGAAAGGTCTATATGTTAATTCATAATATATTTTTATATTCGATCATAAATTAGTTTATAT	GCTGATGCTGGACATACACCTATATTATTGGAAGCTAGAGATGTTTTAGGAGGAAAGGTC----------TTCATAATATATTTTTATATTTGATCATGAATTAGTTTATAT	102	118	del	N/A
384	GCTGATGCTGGACATACACCTATATTATTGGAAGCTAGAGATGTTCTGGGAGGAAAGGTCTATATGTTAATTCATAATATATTTTTATATTCGATCATAAATTAGTTTATAT	GCTGATGCTGGACATACACCTATATTATTGGAAGCTAGAGATGTTCTGGGAGGAAAGGTATATATGTTAATTCATAATATATTTTTATATTCGATCATAAATTAGTTTATAT	112	118	Sub	N/A
385	GCTGATGCTGGACATACACCTATATTATTGGAAGCTAGAGATGTTCTGGGAGGAAAGGTCTATATGTTAATTCATAATATATTTTTATATTCGATCATAAATTAGTTTATAT	GCTGATGCTGGACATACACCTATATTATTGGAAGCTAGAGATGTTCTGGGAGGAAAGGTCTATTTGTTAATTCATAATATATTTTTATATTCGATCATAAATTAGTTTATAT	112	118	Sub	N/A
386	GCTGATGCTGGACATACACCTATATTATTGGAAGCTAGAGATGTTCTGGGAGGAAAGGTCTATATGTTAATTCATAATATATTTTTATATTCGATCATAAATTAGTTTATAT	GCTGAGGCTGGACATACACCTATATTATTGGAAGCTAGAGATGTTTTAGGAGGAAATGTC----------TTCATAATATATTTTTATATTTGATCATAAATTAGTTTATAT	102	118	del	N/A
387	GCTGATGCTGGACATACACCTATATTATTGGAAGCTAGAGATGTTCTGGGAGGAAAGGTCTATATGTTAATTCATAATATATTTTTATATTCGATCATAAATTAGTTTATAT	GCTGATGCTGGACATACACCTATATAATTGGAAGCTAGAGATGTTTTAGGAGGAAATGTC----------TTCATAATACATTTTTATATTTGATCATAAATTAGTTTATAT	102	118	del	N/A
388	GCTGATGCTGGACATACACCTATATTATTGGAAGCTAGAGATGTTCTGGGAGGAAAGGTCTATATGTTAATTCATAATATATTTTTATATTCGATCATAAATTAGTTTATAT	GCTGATGCTGGACATACACCTATATTATTGGAAGCTAGAGATGTTCTGGGAGGAAAGGTCTATATGTTAATTCATAATATGTTTTTATATTCGATCATAAATTAGTTTATAT	112	117	Sub	N/A
389	GCTGATGCTGGACATACACCTATATTATTGGAAGCTAGAGATGTTCTGGGAGGAAAGGTCTATA---TGTTAATTCATAATATATTTTT--------ATATTCGATCATAAATTAGTTTATAT	GCTGATGCTGGACATACACCTATATTATTGGAAGCTAGAGATGTTCTGGGGGGAAAGGTCTATACACTGTT-ATTCATAATA---TTTTCGAACACAATATTTGATCATAAATTAGTTTATAT	119	117	Ins	N/A
390	GCTGATGCTGGACATACACCTATATTATTGGAAGCTAGAGATGTTCTGGGAGGAAAGGTCTATA---TGTTAATTCATAATATATTTTT--------ATATTCGATCATAAATTAGTTTATAT	GCTGATGCTGGACATACACCTATACTATTGGAAGCTAGAGATGTTCTGGGGGGAAAGGTCTATATACTGTT-ATTCATAATA---TTTTCGAACACAATATTTGATCATAAATTAGTTTATAT	119	117	Ins	N/A
391	GCTGATGCTGGACATACACCTATATTATTGGAAGCTAGAGATGTTCTGGGAGGAAAGGTCTATATGTTAATTCATAATATATTTTTATATTCGATCATAAATTAGTTTATAT	GCTGATGCTGGACATACACCTATATTATTGGAAGCTAAAGATGTTCTGGGAGGAAAGGTCTATATGTTAATTCATAATATATTTTTATATTCGATCATAAATTAGTTTATAT	112	116	Sub	N/A
392	GCTGATGCTGGACATACACCTATATTATTGGAAGCTAGAGATGTTCTGGGAGGAAAGGTCTATATGTTAATTCATAATATATT-----TTTATATTCGATCATAAATTAGTTTATAT	GCTGATGCTGGACATACACCTATATTATTGGAAGCTAGAGATGTTCTGGGAGGAAAGGTCTATATGTTAATTCATAATATATTCGAACACAATATTTGATCATAAATTAGTTTATAT	117	115	Ins	N/A
393	GCTGATGCTGGACATACACCTATATTATTGGAAGCTAGAGATGTTCTGGGAGGAAAGGTCTATATGTTAATTCATAATATATTTTTATATTCGATCATAAATTAGTTTATAT	GCTGATGCTGGACATACACCTATATTATTGGAAGCTAGAGATGTTCTGGGAGGAAAGGTCTATATGTTAGTTCATAATATATTTTTGTATTCGATCATAAATTAGTTTATAT	112	115	Sub	N/A
394	GCTGATGCTGGACATACACCTATATTATTGGAAGCTAGAGATGTTCTGGGAGGAAAGGTCTATATGTTAATTCATAATATATTTTTATATTCGATCATAAATTAGTTTATAT	GCTGATGCTGGACATACACCTATACTATTGGAAGCTAGAGATGTTCTGGGAGGAAAGGTC----------TTCATAATATATTTTTATATTTGATCATAAATTAGTTTATAT	102	115	del	N/A
395	GCTGATGCTGGACATACACCTATATTATTGGAAGCTAGAGATGTTCTGGGAGGAAAGGTCTATATGTTAATTCATAATATATTTTTATATTCGATCATAAATTAGTTTATAT	GCTGATGCTGGACATACACCTATATTATTGGAAGCTAGAGATGTTCTGGGAGGAAAGGGCTATATGTTAATTCATAATATATTTTTATATTCGATCATAAATTAGTTTATAT	112	115	Sub	N/A
396	GCTGATGCTGGACATACACCTATATTATTGGAAGCTAGAGATGTTCTGGGAGGAAAGGTCTATATGTTAATTCATAATATATTTTTATATTCGATCATAAATTAGTTTATAT	GCTGATGCTGGACATACACCTATATTATTGGAAGCTAGAGATGTTTTAGGAGGAAAGGTC----------TTCATAATATATGTTTATATTTGATCATAAATTAGTTTATAT	102	115	del	N/A
397	GCTGATGCTGGACATACACCTATATTATTGGAAGCTAGAGATGTTCTGGGAGGAAAGGTCTATATGTTAATTCATAATATATTTTTATATTCGATCATAAATTAGTTTATAT	GCTGATGCTGGACATACACCTATATTATTGGAAGCTAGAGATGTTTTAGGAGGAAATGTC----------TTCATAGTACATTTTTATATTTGATCATAAATTAGTTTATAT	102	115	del	N/A
398	GCTGATGCTGGACATACACCTATATTATTGGAAGCTAGAGATGTTCTGGGAGGAAAGGTCTATATGTTAATTCATAATATATTTTTATATTCGATCATAAATTAGTTTATAT	GCTGATGCTGGACATACACCTATATTATTGGAAGCTAGAGATGTTCTGGGAGGAAAGGTCTATATGTTAATTCATAATATATTTTTATATTCGATCATAAACTAGTTTATAT	112	114	Sub	N/A
399	GCTGATGCTGGACATACACCTATATTATTGGAAGCTAGAGATGTTCTGGGAGGAAAGGTCTATATGTTAATTCATAATATATTTTTATATTCGATCATAAATTAGTTTATAT	GCTGATGCTGGACATACACCTATATTATTGGAAGCTAGAAATGTTCTGGGAGGAAAGGTCTATATGTTAATTCATAATATATTTTTATATTCGATCATAAATTAGTTTATAT	112	114	Sub	N/A
400	GCTGATGCTGGACATACACCTATATTATTGGAAGCTAGAGATGTTCTGGGAGGAAAGGTCTATATGTTAATTCATAATATATTTTTATATTCGATCATAAATTAGTTTATAT	GCTGATGCTGGACATACACCTATATTATTGGAAGCTAGAGATGTTCTGGAAGGAAAGGTCTATATGTTAATTCATAATATATTTTTATATTCGATCATAAATTAGTTTATAT	112	114	Sub	N/A
401	GCTGATGCTGGACATACACCTATATTATTGGAAGCTAGAGATGTTCTGGGAGGAAAGGTCTATATGTTAATTCATAATATATTTTTATATTCGATCATAAATTAGTTTATAT	GCTGATGCTGGACATACACCTATATTATTGGAAGCTAGAGACGTTCTGGGAGGAAAGGTCTATATGTTAATTCATAATATATTTTTATATTCGATCATAAATTAGTTTATAT	112	114	Sub	N/A
402	GCTGATGCTGGACATACACCTATATTATTGGAAGCTAGAGATGTTCTGGGAGGAAAGGTCTATATGTTAATTCATAATATATTTTTATATTCGATCATAAATTAGTTTATAT	GCTGATGCTGGAGATACACCTATATTATTGGAAGCTAGAGATGTTCTGGGAGGAAAGGTCTATATGTTAATTCATAATATATTTTTATATTCGATCATAAATTAGTTTATAT	112	114	Sub	N/A
403	GCTGATGCTGGACATACACCTATATTATTGGAAGCTAGAGATGTTCTGGGAGGAAAGGTCTATATGTTAATTCATAATATATTTTTATATTCGATCATAAATTAGTTTATAT	GCTGATGCTGGACATACACCTATATTATTGGAAGCTAGAGATGTTTTAGGAGGAAATGTC----------TTCATAATACATTTTTGTATTTGATCATAAATTAGTTTATAT	102	113	del	N/A
404	GCTGATGCTGGACATACACCTATATTATTGGAAGCTAGAGATGTTCTGGGAGGAAAGGTCTATATGTTAATTCATAATATATTTTTATATTCGATCATAAATTAGTTTATAT	GCTGATGCTGGACATACACCTATATTATTGGAAGCTAGAGATGTTCTGGGAGGAAAGGTCTATATGTTAATTCATAATATATTTATATATTCGATCATAAATTAGTTTATAT	112	112	Sub	N/A
405	GCTGATGCTGGACATACACCTATATTATTGGAAGCTAGAGATGTTCTGGGAGGAAAGGTCTATATGTTAATTCATAATATATTTTTATATTCGATCATAAATTAGTTTATAT	GCTGATGCTGGACATACACCTATATTATTGGAAGCTAGAGATGTTCTGGGAGGAAAGGTCTATATGTCAATTCATAATATATTTTTATATTCGATCATAAATTAGTTTATAT	112	112	Sub	N/A
406	GCTGATGCTGGACATACACCTATATTATTGGAAGCTAGAGATGTTCTGGGAGGAAAGGTCTATATGTTAATTCATAATATATTTTTATATTCGATCATAAATTAGTTTATAT	GCTGATGCTGGACATACACCTATATTATTGGAAGCTAGAGATGTTCTGGGAGGAAAGGTCTATATGTTAATTCATAATATAGTTTTATATTCGATCATAAATTAGTTTATAT	112	112	Sub	N/A
407	GCTGATGCTGGACATACACCTATATTATTGGAAGCTAGAGATGTTCTGGGAGGAAAGGTCTATATGTTAATTCATAATATATTTTTATATTCGATCATAAATTAGTTTATAT	GCTGATGCTGGACATACACCTATATTATTGGAAGCTAGAGATGTTTTAGGAGGAAAGGTC----------TTCATAATATATTTTTATATTTGATCATAAATTAGTTTATGT	102	111	del	N/A
408	GCTGATGCTGGACATACACCTATATTATTGGAAGCTAGAGATGTTCTGGGAGGAAAGGTCTATATGTTAATTCATAATATATTTTTATATTCGATCATAAATTAGTTTATAT	GCTGATGCTGGACATACACCTATATTATTGGAAGGTAGAGATGTTTTAGGAGGAAAGGTC----------TTCATAATATATTTTTATATTTGATCATAAATTAGTTTATAT	102	111	del	N/A
409	GCTGATGCTGGACATACACCTATATTATTGGAAGCTAGAGATGTTCTGGGAGGAAAGGTCTATATGTTAATTCATAATATATTTTTATATTCGATCATAAATTAGTTTATAT	GCTGATGCTGGACATACAGCTATATTATTGGAAGCTAGAGATGTTCTGGGAGGAAAGGTCTATATGTTAATTCATAATATATTTTTATATTCGATCATAAATTAGTTTATAT	112	111	Sub	N/A
410	GCTGATGCTGGACATACACCTATATTATTGGAAGCTAGAGATGTTCTGGGAGGAAAGGTCTATATGTTAATTCATAATATATTTTTATATTCGATCATAAATTAGTTTATAT	GCTGATGCTGGACATACACCTATATTATTGGAAGCTAGAGATGTTCTGGGAGGAAAGGTCTATATGTTGATTCATAATATATTTTTATATTCGATCATAAATTAGTTTATAT	112	110	Sub	N/A
411	GCTGATGCTGGACATACACCTATATTATTGGAAGCTAGAGATGTTCTGGGAGGAAAGGTCTATATGTTAATTCATAATATATTTTTATATTCGATCATAAATTAGTTTATAT	GCTGATGCTGGACATACACCTATATTATTGGAAGCTAGAGATGTTCTGGGAGGAAAGGTCTATATGTTAATTCATAATATATTTTTATATTCGATCATAAGTTAGTTTATAT	112	110	Sub	N/A
412	GCTGATGCTGGACATACACCTATATTATTGGAAGCTAGAGATGTTCTGGGAGGAAAGGTCTATATGTTAATTCATAATATATTTTTATATTCGATCATAAATTAGTTTATAT	GCTGATGCTGGACATACACCTATATTATTGGAAGCTAGAGATGTTTTAGGAGGAAAGGTC----------TTCATAATATATCTTTATATTTGATCATAAATTAGTTTATAT	102	110	del	N/A
413	GCTGATGCTGGACATACACCTATATTATTGGAAGCTAGAGATGTTCTGGGAGGAAAGGTCTATATGTTAATTCATAATATATTTTTATATTCGATCATAAATTAGTTTATAT	GCTGATGCTGGACATACACCTATATTATTGGAAGCTAGAGATGTTTTAGGAGGAAATGTC----------TTCATAATACATTTTTATATTTGATCATACATTAGTTTATAT	102	109	del	N/A
414	GCTGATGCTGGACATACACCTATATTATTGGAAGCTAGAGATGTTCTGGGAGGAAAGGTCTATATGTTAATTCATAATATATTTTTATATTCGATCATAAATTAGTTTATAT	GCTGATGCTGGACATACACCTATATTATTGGAAGCTAGAGATGTTTTAGGAGGAAATGTC----------TTCATAATACATTTCTATATTTGATCATAAATTAGTTTATAT	102	108	del	N/A
415	GCTGATGCTGGACATACACCTATATTATTGGAAGCTAGAGATGTTCTGGGAGGAAAGGTCTATATGTTAATTCATAATATATTTTTATATTCGATCATAAATTAGTTTATAT	GCTGATGCTGAACATACACCTATATTATTGGAAGCTAGAGATGTTCTGGGAGGAAAGGTCTATATGTTAATTCATAATATATTTTTATATTCGATCATAAATTAGTTTATAT	112	107	Sub	N/A
416	GCTGATGCTGGACATACACCTATATTATTGGAAGCTAGAGATGTTCTGGGAGGAAAGGTCTATATGTTAATTCATAATATATTTTTATATTCGATCATAAATTAGTTTATAT	GCTGATGCTGGACATACACCTATATTATTGGAAGCTAGAGATGTTCTGGGAGGAAAGGTCTATATGTTAATTCATAATATATTTTTATATTCGATCATAAATTAGTTTGTAT	112	107	Sub	N/A
417	GCTGATGCTGGACATACACCTATATTATTGGAAGCTAGAGATGTTCTGGGAGGAAAGGTCTATATGTTAATTCATAATATATTTTTATATTCGATCATAAATTAGTTTATAT	GCTGATGCTGGACATACACCTATATTATTGGAAGCTGGAGATGTTTTAGGAGGAAAGGTC----------TTCATAATATATTTTTATATTTGATCATAAATTAGTTTATAT	102	107	del	N/A
418	GCTGATGCTGGACATACACCTATATTATTGGAAGCTAGAGATGTTCTGGGAGGAAAGGTCTATATGTTAATTCATAATATATTTTTATATTCGATCATAAATTAGTTTATAT	GCTGATGCTGGACATACACCTATATTATTGGAAGCTAGAGATGTTCTGTGAGGAAAGGTCTATATGTTAATTCATAATATATTTTTATATTCGATCATAAATTAGTTTATAT	112	106	Sub	N/A
419	GCTGATGCTGGACATACACCTATATTATTGGAAGCTAGAGATGTTCTGGGAGGAAAGGTCTATATGTTAATTCATAATATATTTTTATATTCGATCATAAATTAGTTTATAT	GCTGATGCTGGACATACACCTATATTATTGGAAGCTGGAGATGTTTTAGGAGGAAATGTC----------TTCATAATACATTTTTATATTTGATCATAAATTAGTTTATAT	102	106	del	N/A
420	GCTGATGCTGGACATACACCTATATTATTGGAAGCTAGAGATGTTCTGGGAGGAAAGGTCTATATGTTAATTCATAATATATTTTTATATTCGATCATAAATTAGTTTATAT	GCTGATGCTGGACATACACCTATATTATTGGAAGCGAGAGATGTTTTAGGAGGAAATGTC----------TTCATAATATATTTTTATATTTGATCATAAATTAGTTTATAT	102	105	del	N/A
421	GCTGATGCTGGACATACACCTATATTATTGGAAGCTAGAGATGTTCTGGGAGGAAAGGTCTATATGTTAATTCATAATATATTTTTATATTCGATCATAAATTAGTTTATAT	GCTGATGCTGGACATACACCTATATTATTGGAAGCTAGAGATGTTTTAGGAGGAAATGTC----------TTCATAATACAGTTTTATATTTGATCATAAATTAGTTTATAT	102	104	del	N/A
422	GCTGATGCTGGACATACACCTATATTATTGGAAGCTAGAGATGTTCTGGGAGGAAAGGTCTATATGTTAATTCATAATATATTTTTATATTCGATCATAAATTAGTTTATAT	GCTGATGCTGGACATACACCTATATTATTGGAACCTAGAGATGTTTTAGGAGGAAATGTC----------TTCATAATACATTTTTATATTTGATCATAAATTAGTTTATAT	102	104	del	N/A
423	GCTGATGCTGGACATACACCTATATTATTGGAAGCTAGAGATGTTCTGGGAGGAAAGGTCTATATGTTAATTCATAATATATTTTTATATTCGATCATAAATTAGTTTATAT	CCTGATGCTGGACATACACCTATATTATTGGAAGCTAGAGATGTTCTGGGAGGAAAGGTCTATATGTTAATTCATAATATATTTTTATATTCGATCATAAATTAGTTTATAT	112	103	Sub	N/A
424	GCTGATGCTGGACATACACCTATATTATTGGAAGCTAGAGATGTTCTGGGAGGAAAGGTCTATATGTTAATTCATAATATATTTTTATATTCGATCATAAATTAGTTTATAT	GCTGATGCTGGACATACACCTATATTATTGGAAGCTAGAGATGTTCTGGGAGGAAAGGTCTATATGTTAATTCATAATATATTTTTATATTCGATCATAAATTAGTTTACAT	112	103	Sub	N/A
425	GCTGATGCTGGACATACACCTATATTATTGGAAGCTAGAGATGTTCTGGGAGGAAAGGTCTATATGTTAATTCATAATATATTTTTATATTCGATCATAAATTAGTTTATAT	GCTGATGCCGGACATACACCTATATTATTGGAAGCTAGAGATGTTTTAGGAGGAAATGTC----------TTCATAATACATTTTTATATTTGATCATAAATTAGTTTATAT	102	103	del	N/A
426	GCTGATGCTGGACATACACCTATATTATTGGAAGCTAGAGATGTTCTGGGAGGAAAGGTCTATATGTTAATTCATAATATATTTTTATATTCGATCATAAATTAGTTTATAT	GCTGATGCTGGACATACACCTATATTATTGGAAGCTAGAGATGTCTTAGGAGGAAATGTC----------TTCATAATACATTTTTATATTTGATCATAAATTAGTTTATAT	102	103	del	N/A
427	GCTGATGCTGGACATACACCTATATTATTGGAAGCTAGAGATGTTCTGGGAGGAAAGGTCTATATGTTAATTCATAATATATTTTTATATTCGATCATAAATTAGTTTATAT	GCTGATGCTGGACATACACCTATATTATTGGAAGCTAGAGATGTTCTGGGAGGAAAGGTCTATATGTTAATTCATAATGTATTTTTATATTCGATCATAAATTAGTTTATAT	112	102	Sub	N/A
428	GCTGATGCTGGACATACACCTATATTATTGGAAGCTAGAGATGTTCTGGGAGGAAAGGTCTATATGTTAATTCATAATATATTTTTATATTCGATCATAAATTAGTTTATAT	GCTGATGCTGGACATACACCTGTATTATTGGAAGCTAGAGATGTTCTGGGAGGAAAGGTCTATATGTTAATTCATAATATATTTTTATATTCGATCATAAATTAGTTTATAT	112	102	Sub	N/A
429	GCTGATGCTGGACATACACCTATATTATTGGAAGCTAGAGATGTTCTGGGAGGAAAGGTCTATATGTTAATTCATAATATATTTTTATATTCGATCATAAATTAGTTTATAT	GCTGATGCTGGACATACACCTATATTATTGGAAGCTAGAGATGTTCTGGGAGGAAAGGTCTATATGTTAATTCATAATATATTTTTATATTCGATCATAAATTAGTTCATAT	112	102	Sub	N/A
430	GCTGATGCTGGACATACACCTATATTATTGGAAGCTAGAGATGTTCTGGGAGGAAAGGTCTATATGTTAATTCATAATATATTTTTATATTCGATCATAAATTAGTTTATAT	GCTGATGCTGGACATACACCTATATTATTGGAAGCTAGAGATGTTCTGGGAGGAAAGGTCTATATGTTAATTCATGATATATTTTTATATTCGATCATAAATTAGTTTATAT	112	102	Sub	N/A
431	GCTGATGCTGGACATACACCTATATTATTGGAAGCTAGAGATGTTCTGGGAGGAAAGGTCTATATGTTAATTCATAATATATTTTTATATTCGATCATAAATTAGTTTATAT	GCTGATGCTGGACATACACCTATATTATTGGAAGCTAGAGATGTTCTGGGAGGAAAGGTCTATATGTTAATTCATAATATATTTTTATATTCGGTCATAAATTAGTTTATAT	112	102	Sub	N/A
432	GCTGATGCTGGACATACACCTATATTATTGGAAGCTAGAGATGTTCTGGGAGGAAAGGTCTATATGTTAATTCATAATATATTTTTATATTCGATCATAAATTAGTTTATAT	GCTGATGCTGGACATACACCTATATTATTGGAAGCTAGAGATGTTTTAGGAGAAAATGTC----------TTCATAATACATTTTTATATTTGATCATAAATTAGTTTATAT	102	102	del	N/A
433	GCTGATGCTGGACATACACCTATATTATTGGAAGCTAGAGATGTTCTGGGAGGAAAGGTCTATATGTTAATTCATAATATATTTTTATATTCGATCATAAATTAGTTTATAT	GCTGATGCTGGACATACAGCTATATTATTGGAAGCTAGAGATGTTTTAGGAGGAAAGGTC----------TTCATAATATATTTTTATATTTGATCATAAATTAGTTTATAT	102	101	del	N/A
434	GCTGATGCTGGACATACACCTATATTATTGGAAGCTAGAGATGTTCTGGGAGGAAAGGTCTATA---TGTTAATTCATAATATATTTTT--------ATATTCGATCATAAATTAGTTTATAT	GCTGATGCTGGACATACACCTATATGATTGGAAGCTAGAGATGTTCTGGGGGGAAAGGTCTATATACTGTT-ATTCATAATA---TTTTCGAACACAATATTTGATCATAAATTAGTTTATAT	119	100	Ins	N/A
435	GCTGATGCTGGACATACACCTATATTATTGGAAGCTAGAGATGTTCTGGGAGGAAAGGTCTATA---TGTTAATTCATAATATATTTTT--------ATATTCGATCATAAATTAGTTTATAT	GCTGATGCTGGACATACACCTATATTATTGGAAGCTAGAGATGTTCGGGGGGGAAAGGTCTATATACTGTT-ATTCATAATA---TTTTCGAACACAATATTTGATCATAAATTAGTTTATAT	119	100	Ins	N/A
436	GCTGATGCTGGACATACACCTATATTATTGGAAGCTAGAGATGTTCTGGGAGGAAAGGTCTATATGTTAATTCATAATATATTTTTATATTCGATCATAAATTAGTTTATAT	GCTGATGCTGGACATACACCTATATTATTGGAAGCTAGATATGTTTTAGGAGGAAAGGTC----------TTCATAATATATTTTTATATTTGATCATAAATTAGTTTATAT	102	99	del	N/A
437	GCTGATGCTGGACATACACCTATATTATTGGAAGCTAGAGATGTTCTGGGAGGAAAGGTCTATATGTTAATTCATAATATATTTTTATATTCGATCATAAATTAGTTTATAT	GCTGATGCTGGACATACACCTATATTATTGGAAGCTAGAGATGTTTTAGGAGAAAAGGTC----------TTCATAATATATTTTTATATTTGATCATAAATTAGTTTATAT	102	99	del	N/A
438	GCTGATGCTGGACATACACCTATATTATTGGAAGCTAGAGATGTTCTGGGAGGAAAGGTCTATATGTTAATTCATAATATATTTTTATATTCGATCATAAATTAGTTTATAT	GCTGATGCTGGACATACACCTATATTATTGGAAGCTAGAGATGTTTTAGGAGGAGATGTC----------TTCATAATACATTTTTATATTTGATCATAAATTAGTTTATAT	102	99	del	N/A
439	GCTGATGCTGGACATACACCTATATTATTGGAAGCTAGAGATGTTCTGGGAGGAAAGGTCTATATGTTAATTCATAATATATTTTTATATTCGATCATAAATTAGTTTATAT	GCTGATGCTGGACATACATCTATATTATTGGAAGCTAGAGATGTTTTAGGAGGAAAGGTC----------TTCATAATATATTTTTATATTTGATCATAAATTAGTTTATAT	102	99	del	N/A
440	GCTGATGCTGGACATACACCTATATTATTGGAAGCTAGAGATGTTCTGGGAGGAAAGGTCTATATGTTAATTCATAATATATTTTTATATTCGATCATAAATTAGTTTATAT	GCTGATGCTGGACATACACCTATATTAGTGGAAGCTAGAGATGTTTTAGGAGGAAATGTC----------TTCATAATATATTTTTATATTTGATCATAAATTAGTTTATAT	102	99	del	N/A
441	GCTGATGCTGGACATACACCTATATTATTGGAAGCTAGAGATGTTCTGGGAGGAAAGGTCTATATGTTAATTCATAATATATTTTTATATTCGATCATAAATTAGTTTATAT	GCTGATGCTGGACACACACCTATATTATTGGAAGCTAGAGATGTTTTAGGAGGAAAGGTC----------TTCATAATATATTTTTATATTTGATCATAAATTAGTTTATAT	102	99	del	N/A
442	GCTGATGCTGGACATACACCTATATTATTGGAAGCTAGAGATGTTCTGGGAGGAAAGGTCTATATGTTAATTCATAATATATTTTTATATTCGATCATAAATTAGTTTATAT	GCTGATGCTGGACATACACCTATATTATTGCAAGCTAGAGATGTTCTGGGAGGAAAGGTCTATATGTTAATTCATAATATATTTTTATATTCGATCATAAATTAGTTTATAT	112	98	Sub	N/A
443	GCTGATGCTGGACATACACCTATATTATTGGAAGCTAGAGATGTTCTGGGAGGAAAGGTCTATATGTTAATTCATAATATATTTTTATATTCGATCATAAATTAGTTTATAT	GCTGATGCTGGACATACACCTATATTATTGGAAGCTAGAGATGTTCTGGGAGGAAAGGTCTATATGTTAATTCATAATATATTTTTATATTCGATCATATATTAGTTTATAT	112	98	Sub	N/A
444	GCTGATGCTGGACATACACCTATATTATTGGAAGCTAGAGATGTTCTGGGAGGAAAGGTCTATATGTTAATTCATAATATATTTTTATATTCGATCATAAATTAGTTTATAT	GCTGATGCTGGACATACACCTATATTATTGGAAGCTAGAGATGTTTTAGGAGGAAATGTC----------TTCATAATACATTTTTATATTTGACCATAAATTAGTTTATAT	102	98	del	N/A
445	GCTGATGCTGGACATACACCTATATTATTGGAAGCTAGAGATGTTCTGGGAGGAAAGGTCTATATGTTAATTCATAATATATTTTTATATTCGATCATAAATTAGTTTATAT	GCTGATGCTGGACATACACCTATATTATTGGAAGCTAGAGATGTTTTAGGAGGAAATGTC----------TTCATAACACATTTTTATATTTGATCATAAATTAGTTTATAT	102	98	del	N/A
446	GCTGATGCTGGACATACACCTATATTATTGGAAGCTAGAGATGTTCTGGGAGGAAAGGTCTATATGTTAATTCATAATATATTTTTATATTCGATCATAAATTAGTTTATAT	GCTGATGCTGGACATACACCTATATTATTGGAAGCTAGAGATGTTTCAGGAGGAAAGGTC----------TTCATAATATATTTTTATATTTGATCATAAATTAGTTTATAT	102	98	del	N/A
447	GCTGATGCTGGACATACACCTATATTATTGGAAGCTAGAGATGTTCTGGGAGGAAAGGTCTATATGTTAATTCATAATATATTTTTATATTCGATCATAAATTAGTTTATAT	GCTGATGCTGGACATACACCTATATGATTGGAAGCTAGAGATGTTTTAGGAGGAAATGTC----------TTCATAATATATTTTTATATTTGATCATAAATTAGTTTATAT	102	98	del	N/A
448	GCTGATGCTGGACATACACCTATATTATTGGAAGCTAGAGATGTTCTGGGAGGAAAGGTCTATATGTTAATTCATAATATATTTTTATATTCGATCATAAATTAGTTTATAT	GCTGATGCTGGACATACACCTATATTATTGAAAGCTAGAGATGTTTTAGGAGGAAAGGTC----------TTCATAATATATTTTTATATTTGATCATAAATTAGTTTATAT	102	98	del	N/A
449	GCTGATGCTGGACATACACCTATATTATTGGAAGCTAGAGATGTTCTGGGAGGAAAGGTCTATATGTTAATTCATAATATATTTTTATATTCGATCATAAATTAGTTTATAT	GCTGATGCTGGACATACACCTATATTATTGGAAGCTAGAGATGTTCTGGTAGGAAAGGTCTATATGTTAATTCATAATATATTTTTATATTCGATCATAAATTAGTTTATAT	112	97	Sub	N/A
450	GCTGATGCTGGACATACACCTATATTATTGGAAGCTAGAGATGTTCTGGGAGGAAAGGTCTATATGTTAATTCATAATATATTTTTATATTCGATCATAAATTAGTTTATAT	GCTGATGCTGGACATACACCTATATTATTGGAAGCTAGAGATGTTTTAGGAGGAAAGGTC----------TTCATAATATATTTTTATATTTGGTCATAAATTAGTTTATAT	102	97	del	N/A
451	GCTGATGCTGGACATACACCTATATTATTGGAAGCTAGAGATGTTCTGGGAGGAAAGGTCTATATGTTAATTCATAATATATTTTTATATTCGATCATAAATTAGTTTATAT	GCTGATGCTGGACATACACCTATATTATTGAAAGCTAGAGATGTTTTAGGAGGAAATGTC----------TTCATAATACATTTTTATATTTGATCATAAATTAGTTTATAT	102	97	del	N/A
452	GCTGATGCTGGACATACACCTATATTATTGGAAGCTAGAGATGTTCTGGGAGGAAAGGTCTATATGTTAATTCATAATATATTTTTATATTCGATCATAAATTAGTTTATAT	GCTGATGCTGGACATACACCTATATTATTGGAAGCTAGAGATGTTTTAGGAGGAAAGGTC----------TTCATAATATATTTTTATATTTGATCATAAATTAGTCTATAT	102	97	del	N/A
453	GCTGATGCTGGACATACACCTATATTATTGGAAGCTAGAGATGTTCTGGGAGGAAAGGTCTATATGTTAATTCATAATATATTTTTATATTCGATCATAAATTAGTTTATAT	GCTGATGCTGGACATACACCTATATTATTGGAAGCTAGAGATGTTTTAGGAGGAAAGGTC----------TTCATAATATATTTTTATATTTGATCATAGATTAGTTTATAT	102	96	del	N/A
454	GCTGATGCTGGACATACACCTATATTATTGGAAGCTAGAGATGTTCTGGGAGGAAAGGTCTATATGTTAATTCATAATATATTTTTATATTCGATCATAAATTAGTTTATAT	GCTGATGCTGGACATACACCTATATTATTGGAAGCTAGAGATGTTTTAGGAGGAAAGGTC----------TTCATAATATATTTCTATATTTGATCATAAATTAGTTTATAT	102	96	del	N/A
455	GCTGATGCTGGACATACACCTATATTATTGGAAGCTAGAGATGTTCTGGGAGGAAAGGTCTATATGTTAATTCATAATATATTTTTATATTCGATCATAAATTAGTTTATAT	GCTGATGCTGGACATACACCTATATTATTGGAAGCTAGAGATGTTTTAGGAGGAAATGTC----------TTCATAATACATTCTTATATTTGATCATAAATTAGTTTATAT	102	96	del	N/A
456	GCTGATGCTGGACATACACCTATATTATTGGAAGCTAGAGATGTTCTGGGAGGAAAGGTCTATATGTTAATTCATAATATATTTTTATATTCGATCATAAATTAGTTTATAT	GCTGATGCTGGACATACACCTATATTATTGGAAGCTAGAGATGTTTTAGGAGGAAATGTC----------TTCATAATACATTTTTATATTTGATCATCAATTAGTTTATAT	102	95	del	N/A
457	GCTGATGCTGGACATACACCTATATTATTGGAAGCTAGAGATGTTCTGGGAGGAAAGGTCTATATGTTAATTCATAATATATTTTTATATTCGATCATAAATTAGTTTATAT	GCTGATGCTGGACACACACCTATATTATTGGAAGCTAGAGATGTTTTAGGAGGAAATGTC----------TTCATAATACATTTTTATATTTGATCATAAATTAGTTTATAT	102	95	del	N/A
458	GCTGATGCTGGACATACACCTATATTATTGGAAGCTAGAGATGTTCTGGGAGGAAAGGTCTATATGTTAATTCATAATATATTTTTATATTCGATCATAAATTAGTTTATAT	GCTGATGCTGGACATACACCTATATTATTGGAAGCAAGAGATGTTTTAGGAGGAAAGGTC----------TTCATAATATATTTTTATATTTGATCATAAATTAGTTTATAT	102	95	del	N/A
459	GCTGATGCTGGACATACACCTATATTATTGGAAGCTAGAGATGTTCTGGGAGGAAAGGTCTATATGTTAATTCATAATATATTTTTATATTCGATCATAAATTAGTTTATAT	GCTGATGCTGGACATACACCTATATTATTGGAAGCTAGAGATGTTTTCGGAGGAAAGGTC----------TTCATAATATATTTTTATATTTGATCATAAATTAGTTTATAT	102	94	del	N/A
460	GCTGATGCTGGACATACACCTATATTATTGGAAGCTAGAGATGTTCTGGGAGGAAAGGTCTATATGTTAATTCATAATATATTTTTATATTCGATCATAAATTAGTTTATAT	GCTGATGCTGGACATACACCTATATTATTGGAAGCTAGAAATGTTTTAGGAGGAAAGGTC----------TTCATAATATATTTTTATATTTGATCATAAATTAGTTTATAT	102	94	del	N/A
461	GCTGATGCTGGACATACACCTATATTATTGGAAGCTAGAGATGTTCTGGGAGGAAAGGTCTATATGTTAATTCATAATATATTTTTATATTCGATCATAAATTAGTTTATAT	GCTGATGCTGGACATACAACTATATTATTGGAAGCTAGAGATGTTTTAGGAGGAAATGTC----------TTCATAATACATTTTTATATTTGATCATAAATTAGTTTATAT	102	94	del	N/A
462	GCTGATGCTGGACATACACCTATATTATTGGAAGCTAGAGATGTTCTGGGAGGAAAGGTCTATATGTTAATTCATAATATATTTTTATATTCGATCATAAATTAGTTTATAT	GCTGATGCTGGACATACACCTATATTATTGGAAGCTAGAGATGTTTTAGGAGGAAAGGTC----------TTCATAATATATTTTTATATCTGATCATAAATTAGTTTATAT	102	94	del	N/A
463	GCTGATGCTGGACATACACCTATATTATTGGAAGCTAGAGATGTTCTGGGAGGAAAGGTCTATATGTTAATTCATAATATATTTTTATATTCGATCATAAATTAGTTTATAT	GCTGATGCTGGACATACAACTATATTATTGGAAGCTAGAGATGTTCTGGGAGGAAAGGTCTATATGTTAATTCATAATATATTTTTATATTCGATCATAAATTAGTTTATAT	112	94	Sub	N/A
464	GCTGATGCTGGACATACACCTATATTATTGGAAGCTAGAGATGTTCTGGGAGGAAAGGTCTATATGTTAATTCATAATATATTTTTATATTCGATCATAAATTAGTTTATAT	GCTGATGCTGGACATACACCTATATTATTGGAAGCTAGAGATGTTTTAGGAGGAA--------ATGTT--TTCATAATACATTTTTATATTTGATCATAAATTAGTTTATAT	102	93	del	N/A
465	GCTGATGCTGGACATACACCTATATTATTGGAAGCTAGAGATGTTCTGGGAGGAAAGGTCTATATGTTAATTCATAATATATTTTTATATTCGATCATAAATTAGTTTATAT	GCTGATGCTGGACATACGCCTATATTATTGGAAGCTAGAGATGTTCTGGGAGGAAAGGTCTATATGTTAATTCATAATATATTTTTATATTCGATCATAAATTAGTTTATAT	112	93	Sub	N/A
466	GCTGATGCTGGACATACACCTATATTATTGGAAGCTAGAGATGTTCTGGGAGGAAAGGTCTATATGTTAATTCATAATATATTTTTATATTCGATCATAAATTAGTTTATAT	GCTGATGCTGGACATACACCTATATTATTGGAAGCTAGAGATGTTTTAGGAGGAAATGCC----------TTCATAATACATTTTTATATTTGATCATAAATTAGTTTATAT	102	93	del	N/A
467	GCTGATGCTGGACATACACCTATATTATTGGAAGCTAGAGATGTTCTGGGAGGAAAGGTCTATATGTTAATTCATAATATATTTTTATATTCGATCATAAATTAGTTTATAT	GCTGATGCTGGACATACACCTATATTATTGGAAGCTAGAGATGTTTTAGGAAGAAAGGTC----------TTCATAATATATTTTTATATTTGATCATAAATTAGTTTATAT	102	93	del	N/A
468	GCTGATGCTGGACATACACCTATATTATTGGAAGCTAGAGATGTTCTGGGAGGAAAGGTCTATATGTTAATTCATAATATATTTTTATATTCGATCATAAATTAGTTTATAT	GCTGATGCTGGAGATACACCTATATTATTGGAAGCTAGAGATGTTTTAGGAGGAAAGGTC----------TTCATAATATATTTTTATATTTGATCATAAATTAGTTTATAT	102	93	del	N/A
469	GCTGATGCTGGACATACACCTATATTATTGGAAGCTAGAGATGTTCTGGGAGGAAAGGTCTATATGTTAATTCATAATATATTTTTATATTCGATCATAAATTAGTTTATAT	GCTGATGCTAGACATACACCTATATTATTGGAAGCTAGAGATGTTCTGGGAGGAAAGGTCTATATGTTAATTCATAATATATTTTTATATTCGATCATAAATTAGTTTATAT	112	92	Sub	N/A
470	GCTGATGCTGGACATACACCTATATTATTGGAAGCTAGAGATGTTCTGGGAGGAAAGGTCTATATGTTAATTCATAATATATTTTTATATTCGATCATAAATTAGTTTATAT	GCTGATGCTGGACATACACCTATATTATTGGAAGCTAGAGATGTTTTAGGAGGAAAGGTC----------TTCATAATATATTTTTATATTTGACCATAAATTAGTTTATAT	102	92	del	N/A
471	GCTGATGCTGGACATACACCTATATTATTGGAAGCTAGAGATGTTCTGGGAGGAAAGGTCTATATGTTAATTCATAATATATTTTTATATTCGATCATAAATTAGTTTATAT	GCGGATGCTGGACATACACCTATATTATTGGAAGCTAGAGATGTTTTAGGAGGAAATGTC----------TTCATAATATATTTTTATATTTGATCATAAATTAGTTTATAT	102	91	del	N/A
472	GCTGATGCTGGACATACACCTATATTATTGGAAGCTAGAGATGTTCTGGGAGGAAAGGTCTATATGTTAATTCATAATATATTTTTATATTCGATCATAAATTAGTTTATAT	GCTGATGCTGGACATACACCTATATTATTGGAAGCTAGAGATGTTCTGGGAGGAAAGGTCTATATGTTAATTAATAATATATTTTTATATTCGATCATAAATTAGTTTATAT	112	91	Sub	N/A
473	GCTGATGCTGGACATACACCTATATTATTGGAAGCTAGAGATGTTCTGGGAGGAAAGGTCTATATGTTAATTCATAATATATTTTTATATTCGATCATAAATTAGTTTATAT	GCTGATGCTGGACATACATCTATATTATTGGAAGCTAGAGATGTTTTAGGAGGAAATGTC----------TTCATAATACATTTTTATATTTGATCATAAATTAGTTTATAT	102	90	del	N/A
474	GCTGATGCTGGACATACACCTATATTATTGGAAGCTAGAGATGTTCTGGGAGGAAAGGTCTATATGTTAATTCATAATATATTTTTATATTCGATCATAAATTAGTTTATAT	GCTGATGCTGGACATACACCTATATTATTGGAAGCTAGAGATGTTTTAGGAGGAAAGGTC----------TTCATAACATATTTTTATATTTGATCATAAATTAGTTTATAT	102	90	del	N/A
475	GCTGATGCTGGACATACACCTATATTATTGGAAGCTAGAGATGTTCTGGGAGGAAAGGTCTATATGTTAATTCATAATATATTTTTATATTCGATCATAAATTAGTTTATAT	GCTGATGCTGGACATACACCTATATTATTGGAAGCTAGAGATGTTTTAGGAGGAAATGTC----------TTCATAATACATTTTTATATCTGATCATAAATTAGTTTATAT	102	90	del	N/A
476	GCTGATGCTGGACATACACCTATATTATTGGAAGCTAGAGATGTTCTGGGAGGAAAGGTCTATATGTTAATTCATAATATATTTTTATATTCGATCATAAATTAGTTTATAT	GCTGATGCTGGACATACACCTATATTATTGGAAGCTAGAGATGTTTTAGGAGGAAAGGTC----------TTCATAATATATTTTTATATTTGATCGTAAATTAGTTTATAT	102	90	del	N/A
477	GCTGATGCTGGACATACACCTATATTATTGGAAGCTAGAGATGTTCTGGGAGGAAAGGTCTATATGTTAATTCATAATATATTTTTATATTCGATCATAAATTAGTTTATAT	GCTGATGCTGGACGTACACCTATATTATTGGAAGCTAGAGATGTTCTGGGAGGAAAGGTCTATATGTTAATTCATAATATATTTTTATATTCGATCATAAATTAGTTTATAT	112	89	Sub	N/A
478	GCTGATGCTGGACATACACCTATATTATTGGAAGCTAGAGATGTTCTGGGAGGAAAGGTCTATATGTTAATTCATAATATATTTTTATATTCGATCATAAATTAGTTTATAT	GCTGATGCTGGACATACACCTATATTATTGGAAGCTAGAGATGTTTTAGGAGGAAAGGTC----------TTCATAATATATTTTTATATTTGATCATAAATTAGTTTATAC	102	89	del	N/A
479	GCTGATGCTGGACATACACCTATATTATTGGAAGCTAGAGATGTTCTGGGAGGAAAGGTCTATATGTTAATTCATAATATATTTTTATATTCGATCATAAATTAGTTTATAT	GCTGATGCTGGACATACACCTATATTATTGGAAGCTAGAGATGTTTTAGGAGGAAAGGTC----------TTCATAATATATTTTTATATTTAATCATAAATTAGTTTATAT	102	89	del	N/A
480	GCTGATGCTGGACATACACCTATATTATTGGAAGCTAGAGATGTTCTGGGAGGAAAGGTCTATATGTTAATTCATAATATATTTTTATATTCGATCATAAATTAGTTTATAT	GCTGATGCTGGACATACACCTATATTATTGGAAGCTAGAGATGTTTTAGAAGGAAAGGTC----------TTCATAATATATTTTTATATTTGATCATAAATTAGTTTATAT	102	89	del	N/A
481	GCTGATGCTGGACATACACCTATATTATTGGAAGCTAGAGATGTTCTGGGAGGAAAGGTCTATA---TGTTAATTCATAATATATTTTT--------ATATTCGATCATAAATTAGTTTATAT	GCTTATGCTGGACATACACCTATATTATTGGAAGCTAGAGATGTTCTGGGGGGAAAGGTCTATATACTGTT-ATTCATAATA---TTTTCGAACACAATATTTGATCATAAATTAGTTTATAT	119	89	Ins	N/A
482	GCTGATGCTGGACATACACCTATATTATTGGAAGCTAGAGATGTTCTGGGAGGAAAGGTCTATA---TGTTAATTCATAATATATTTTT--------ATATTCGATCATAAATTAGTTTATAT	GCTGATGCTGGACATACACCTATATTAGTGGAAGCTAGAGATGTTCTGGGGGGAAAGGTCTATATACTGTT-ATTCATAATA---TTTTCGAACACAATATTTGATCATAAATTAGTTTATAT	119	89	Ins	N/A
483	GCTGATGCTGGACATACACCTATATTATTGGAAGCTAGAGATGTTCTGGGAGGAAAGGTCTATATGTTAATTCATAATATATTTTTATATTCGATCATAAATTAGTTTATAT	GCTGATGCTGGACATACACCTACATTATTGGAAGCTAGAGATGTTCTGGGAGGAAAGGTCTATATGTTAATTCATAATATATTTTTATATTCGATCATAAATTAGTTTATAT	112	88	Sub	N/A
484	GCTGATGCTGGACATACACCTATATTATTGGAAGCTAGAGATGTTCTGGGAGGAAAGGTCTATATGTTAATTCATAATATATTTTTATATTCGATCATAAATTAGTTTATAT	GCTGATGCTGGACATACACCTATACTATTGGAAGCTAGAGATGTTTTAGGAGGAAATGTC----------TTCATAATATATTTTTATATTTGATCATAAATTAGTTTATAT	102	88	del	N/A
485	GCTGATGCTGGACATACACCTATATTATTGGAAGCTAGAGATGTTCTGGGAGGAAAGGTCTATATGTTAATTCATAATATATTTTTATATTCGATCATAAATTAGTTTATAT	GCTGATGCTGGACATACACCTATATTATTGGAAGCTAGAGATGTTTTAGGAGGAAAAGTC----------TTCATAATATATTTTTATATTTGATCATAAATTAGTTTATAT	102	88	del	N/A
486	GCTGATGCTGGACATACACCTATATTATTGGAAGCTAGAGATGTTCTGGGAGGAAAGGTCTATATGTTAATTCATAATATATTTTTATATTCGATCATAAATTAGTTTATAT	GCTGATGCTGGACATACACCTATATTATTGGAAGCTAGAGATGTTTTAGGAGGAAAGGTC----------TTCATAATATATTTTCATATTTGATCATAAATTAGTTTATAT	102	88	del	N/A
487	GCTGATGCTGGACATACACCTATATTATTGGAAGCTAGAGATGTTCTGGGAGGAAAGGTCTATA---TGTTAATTCATAATATATTTTT--------ATATTCGATCATAAATTAGTTTATAT	GCTGATGCTGGGCATACACCTATATTATTGGAAGCTAGAGATGTTCTGGGGGGAAAGGTCTATATACTGTT-ATTCATAATA---TTTTCGAACACAATATTTGATCATAAATTAGTTTATAT	119	88	Ins	N/A
488	GCTGATGCTGGACATACACCTATATTATTGGAAGCTAGAGATGTTCTGGGAGGAAAGGTCTATATGTTAATTCATAATATATTTTTATATTCGATCATAAATTAGTTTATAT	GCTGATGCTGGACATACACCTATATTATTGGAAGCTAGAGATGTTCTGGGAGGAAAGGTCTATATGTTAATTCATATTATATTTTTATATTCGATCATAAATTAGTTTATAT	112	87	Sub	N/A
489	GCTGATGCTGGACATACACCTATATTATTGGAAGCTAGAGATGTTCTGGGAGGAAAGGTCTATATGTTAATTCATAATATATTTTTATATTCGATCATAAATTAGTTTATAT	GCTTATGCTGGACATACACCTATATTATTGGAAGCTAGAGATGTTTTAGGAGGAAATGTC----------TTCATAATATATTTTTATATTTGATCATAAATTAGTTTATAT	102	87	del	N/A
490	GCTGATGCTGGACATACACCTATATTATTGGAAGCTAGAGATGTTCTGGGAGGAAAGGTCTATATGTTAATTCATAATATATTTTTATATTCGATCATAAATTAGTTTATAT	GCTGATGCTGGACATACACCTATATTATTGGAAGCTAGAGATGTTCTGGGAGGAAAGGACTATATGTTAATTCATAATATATTTTTATATTCGATCATAAATTAGTTTATAT	112	86	Sub	N/A
491	GCTGATGCTGGACATACACCTATATTATTGGAAGCTAGAGATGTTCTGGGAGGAAAGGTCTATATGTTAATTCATAATATATTTTTATATTCGATCATAAATTAGTTTATAT	CCTGATGCTGGACATACACCTATATTATTGGAAGCTAGAGATGTTTTAGGAGGAAAGGTC----------TTCATAATATATTTTTATATTTGATCATAAATTAGTTTATAT	102	86	del	N/A
492	GCTGATGCTGGACATACACCTATATTATTGGAAGCTAGAGATGTTCTGGGAGGAAAGGTCTATATGTTAATTCATAATATATTTTTATATTCGATCATAAATTAGTTTATAT	GCTGATGCTGGACATACACCTATATTATTGGAAGCTAGAGATGTTTTAGGAGGAAAGGTC----------TTCGTAATATATTTTTATATTTGATCATAAATTAGTTTATAT	102	86	del	N/A
493	GCTGATGCTGGACATACACCTATATTATTGGAAGCTAGAGATGTTCTGGGAGGAAAGGTCTATATGTTAATTCATAATATATTTTTATATTCGATCATAAATTAGTTTATAT	GCTGATGCTGGACATACACCTATATTATTGGAAGCTAGAGATGTTCTGGGAGGAAAGGTCTATATGTTAATTCATAATATATTTTTATATTCGATCATAAATCAGTTTATAT	112	86	Sub	N/A
494	GCTGATGCTGGACATACACCTATATTATTGGAAGCTAGAGATGTTCTGGGAGGAAAGGTCTATATGTTAATTCATAATATATTTTTATATTCGATCATAAATTAGTTTATAT	GCTGATGCTGGACATACACCTATATTATTGGAAGCTAGAGATGTTCTGGGAGGAAAGGTCTATATGTTAATTCATAATATATTTTTATATTCGATCACAAATTAGTTTATAT	112	86	Sub	N/A
495	GCTGATGCTGGACATACACCTATATTATTGGAAGCTAGAGATGTTCTGGGAGGAAAGGTCTATATGTTAATTCATAATATATTTTTATATTCGATCATAAATTAGTTTATAT	GCTGATGCTGGACATACACCTATATTATTGGAAGCTAGAGATGTTCTGGGAGGAAAGGTCTATATGTTAATTCATAATATCTTTTTATATTCGATCATAAATTAGTTTATAT	112	84	Sub	N/A
496	GCTGATGCTGGACATACACCTATATTATTGGAAGCTAGAGATGTTCTGGGAGGAAAGGTCTATA---TGTTAATTCATAATATATTTTT--------ATATTCGATCATAAATTAGTTTATAT	GCGGATGCTGGACATACACCTATATTATTGGAAGCTAGAGATGTTCTGGGGGGAAAGGTCTATATACTGTT-ATTCATAATA---TTTTCGAACACAATATTTGATCATAAATTAGTTTATAT	119	84	Ins	N/A
497	GCTGATGCTGGACATACACCTATATTATTGGAAGCTAGAGATGTTCTGGGAGGAAAGGTCTATATGTTAATTCATAATATATTTTTATATTCGATCATAAATTAGTTTATAT	GCTGATGCTGGACATACACCTATATTATTGGAAGCTAGAGATGTTTTAGGAGGAAATGTC----------TTCATAATACATTTTTATACTTGATCATAAATTAGTTTATAT	102	84	del	N/A
498	GCTGATGCTGGACATACACCTATATTATTGGAAGCTAGAGATGTTCTGGGAGGAAAGGTCTATATGTTAATTCATAATATATTTTTATATTCGATCATAAATTAGTTTATAT	GCTGATGCTGGACATACGCCTATATTATTGGAAGCTAGAGATGTTTTAGGAGGAAATGTC----------TTCATAATACATTTTTATATTTGATCATAAATTAGTTTATAT	102	83	del	N/A
499	GCTGATGCTGGACATACACCTATATTATTGGAAGCTAGAGATGTTCTGGGAGGAAAGGTCTATATGTTAATTCATAATATATTTTTATATTCGATCATAAATTAGTTTATAT	GCTGATGCTGGACATACACCTATATTATTGGAAGCTAGAGATGTTCTAGGAGGAAAGGTCTATATGTTAGTTCATAATATATTTTTATATTCGATCATAAATTAGTTTATAT	112	83	Sub	N/A
500	#NAME?	GCTGATGCTGGACATACACCGCTGATGCTGGACATACACCTATATTATTGGAAGCTAGAGATGTTTTAGGAGGAAAGGTC----------TTCATAATATATTTTTATATTTTGATCATAAATTAGTTTATAT	123	82	Ins	N/A
501	GCTGATGCTGGACATACACCTATATTATTGGAAGCTAGAGATGTTCTGGGAGGAAAGGTCTATATGTTAATTCATAATATATTTTTATATTCGATCATAAATTAGTTTATAT	GCTGATGCTGGACATACACCTATATTATTGGAAGCTAGAGATGCTTTAGGAGGAAATGTC----------TTCATAATACATTTTTATATTTGATCATAAATTAGTTTATAT	102	82	del	N/A
502	GCTGATGCTGGACATACACCTATATTATTGGAAGCTAGAGATGTTCTGGGAGGAAAGGTCTATATGTTAATTCATAATATATTTTTATATTCGATCATAAATTAGTTTATAT	GCTGATGCTGGACATACACCTATATTATTGGAAGCTAGAGATGTTTTAGGAGGAAGTGTC----------TTCATAATACATTTTTATATTTGATCATAAATTAGTTTATAT	102	82	del	N/A
503	GCTGATGCTGGACATACACCTATATTATTGGAAGCTAGAGATGTTCTGGGAGGAAAGGTCTATATGTTAATTCATAATATATTTTTATATTCGATCATAAATTAGTTTATAT	GCTGATGCTGGACATACACCTATATTATTGGAAGCTAGAGATGTTTTAGGAGGAAAGGTC----------TTCATAATATATTTTTATATTTTATCATAAATTAGTTTATAT	102	81	del	N/A
504	GCTGATGCTGGACATACACCTATATTATTGGAAGCTAGAGATGTTCTGGGAGGAAAGGTCTATATGTTAATTCATAATATATTTTTATATTCGATCATAAATTAGTTTATAT	GCTGATGCTGGACATACACCTATATTATTGGAAGCTAGAGATGTTCTGGGAGGAAAGGTCTATATGTTAATTCATAATATTTTTTTATATTCGATCATAAATTAGTTTATAT	112	81	Sub	N/A
505	GCTGATGCTGGACATACACCTATATTATTGGAAGCTAGAGATGTTCTGGGAGGAAAGGTCTATATGTTAATTCATAATATATTTTTATA-TTCGATCATAAATTAGTTTATAT	GCTGATGCTGGACTTACACCTATATTATTGGAAGCTAGAGATGTTTTAGGAGGAAAGGTC----------TTCATAATATATTTTTATATTTTGATCATAAATTAGTTTATAT	103	81	del	N/A
506	GCTGATGCTGGACATACACCTATATTATTGGAAGCTAGAGATGTTCTGGGAGGAAAGGTCTATATGTTAATTCATAATATATTTTTATATTCGATCATAAATTAGTTTATAT	GCTGATGCTGGACATACACCTATATTATTGGAAGCTAGAGATGTTTTAGGAGGAAATGTC----------TTCATAATACGTTTTTATATTTGATCATAAATTAGTTTATAT	102	81	del	N/A
507	GCTGATGCTGGACATACACCTATATTATTGGAAGCTAGAGATGTTCTGGGAGGAAAGGTCTATATGTTAATTCATAATATATTTTTATATTCGATCATAAATTAGTTTATAT	GCTGATGCTGGACATACACCTATATTATTGGAAGCTAGAGATGTTTTAGGAAGAAATGTC----------TTCATAATACATTTTTATATTTGATCATAAATTAGTTTATAT	102	81	del	N/A
508	GCTGATGCTGGACATACACCTATATTATTGGAAGCTAGAGATGTTCTGGGAGGAAAGGTCTATATGTTAATTCATAATATATTTTTATATTCGATCATAAATTAGTTTATAT	GCTGATGCTGGACATACACCTATATTATTGGAAGCTAGAGATGTTTTAGGAGGAAAGGTC----------TTCACAATATATTTTTATATTTGATCATAAATTAGTTTATAT	102	81	del	N/A
509	GCTGATGCTGGACATACACCTATATTATTGGAAGCTAGAGATGTTCTGGGAGGAAAGGTCTATATGTTAATTCATAATATATTTTTATATTCGATCATAAATTAGTTTATAT	GCTGATGCTGGACATACACCTATATTATTGGTAGCTAGAGATGTTTTAGGAGGAAAGGTC----------TTCATAATATATTTTTATATTTGATCATAAATTAGTTTATAT	102	80	del	N/A
510	GCTGATGCTGGACATACACCTATATTATTGGAAGCTAGAGATGTTCTGGGAGGAAAGGTCTATATGTTAATTCATAATATATTTTTATATTCGATCATAAATTAGTTTATAT	GCTGATGCTGGACATACACCTATATTATTGGAAGCTAGAGATGTTTTAGGAGGAAATATC----------TTCATAATACATTTTTATATTTGATCATAAATTAGTTTATAT	102	80	del	N/A
511	GCTGATGCTGGACATACACCTATATTATTGGAAGCTAGAGATGTTCTGGGAGGAAAGGTCTATATGTTAATTCATAATATATTTTTATA-TTCGATCATAAATTAGTTTATAT	GCTGATGCTGGACATACACCTATACTATTGGAAGCTAGAGATGTTTTAGGAGGAAAGGTC----------TTCATAATATATTTTTATATTTTGATCATAAATTAGTTTATAT	103	80	del	N/A
512	GCTGATGCTGGACATACACCTATATTATTGGAAGCTAGAGATGTTCTGGGAGGAAAGGTCTATATGTTAATTCATAATATATTTTTATATTCGATCATAAATTAGTTTATAT	GCTGATGCTGGACATACGCCTATATTATTGGAAGCTAGAGATGTTTTAGGAGGAAAGGTC----------TTCATAATATATTTTTATATTTGATCATAAATTAGTTTATAT	102	80	del	N/A
513	GCTGATGCTGGACATACACCTATATTATTGGAAGCTAGAGATGTTCTGGGAGGAAAGGTCTATATGTTAATTCATAATATATTTTTATATTCGATCATAAATTAGTTTATAT	GCTGATGCTGGACATACACCTATATTATTGGAAGCTAGAGATGTTTTAGGAGGAAATGTC----------TTCATAATACAATTTTATATTTGATCATAAATTAGTTTATAT	102	80	del	N/A
514	GCTGATGCTGGACATACACCTATATTATTGGAAGCTAGAGATGTTCTGGGAGGAAAGGTCTATATGTTAATTCATAATATATTTTTATATTCGATCATAAATTAGTTTATAT	GCTGATGCTGGACATACAGCTATATTATTGGAAGCTAGAGATGTTTTAGGAGGAAATGTC----------TTCATAATACATTTTTATATTTGATCATAAATTAGTTTATAT	102	80	del	N/A
515	GCTGATGCTGGACATACACCTATATTATTGGAAGCTAGAGATGTTCTGGGAGGAAAGGTCTATATGTTAATTCATAATATATTTTTATATTCGATCATAAATTAGTTTATAT	GCTGATGCTGGACATACACCTACATTATTGGAAGCTAGAGATGTTTTAGGAGGAAATGTC----------TTCATAATACATTTTTATATTTGATCATAAATTAGTTTATAT	102	80	del	N/A
516	GCTGATGCTGGACATACACCTATATTATTGGAAGCTAGAGATGTTCTGGGAGGAAAGGTCTATATGTTAATTCATAATATATTTTTATATTCGATCATAAATTAGTTTATAT	GCTGATGCTGGACATACACCTATATTATTGGAAGCTAGAGATGTTTTAGGAGGAAAGGTC----------TTCATAATATATTTTTATATTTGATCATAAATTAGTTCATAT	102	79	del	N/A
517	GCTGATGCTGGACATACACCTATATTATTGGAAGCTAGAGATGTTCTGGGAGGAAAGGTCTATATGTTAATTCATAATATATTTTTATATTCGATCATAAATTAGTTTATAT	GCTGATGCTGGACATACACCTATTTTATTGGAAGCTAGAGATGTTCTGGGAGGAAAGGTCTATATGTTAATTCATAATATATTTTTATATTCGATCATAAATTAGTTTATAT	112	79	Sub	N/A
518	GCTGATGCTGGACATACACCTATATTATTGGAAGCTAGAGATGTTCTGGGAGGAAAGGTCTATATGTTAATTCATAATATATTTTTATATTCGATCATAAATTAGTTTATAT	GCTGATGCTGGACATACACCTATATTATTGGAAGCTAGAGATATTTTAGGAGGAAAGGTC----------TTCATAATATATTTTTATATTTGATCATAAATTAGTTTATAT	102	79	del	N/A
519	GCTGATGCTGGACATACACCTATATTATTGGAAGCTAGAGATGTTCTGGGAGGAAAGGTCTATATGTTAATTCATAATATATTTTTATATTCGATCATAAATTAGTTTATAT	GCTGATGATGGACATACACCTATATTATTGGAAGCTAGAGATGTTCTGGGAGGAAAGGTCTATATGTTAATTCATAATATATTTTTATATTCGATCATAAATTAGTTTATAT	112	79	Sub	N/A
520	GCTGATGCTGGACATACACCTATATTATTGGAAGCTAGAGATGTTCTGGGAGGAAAGGTCTATATGTTAATTCATAATATATTTTTATATTCGATCATAAATTAGTTTATAT	GCTGATGCTGGACATACACCTATATTATTGGTAGCTAGAGATGTTCTGGGAGGAAAGGTCTATATGTTAATTCATAATATATTTTTATATTCGATCATAAATTAGTTTATAT	112	78	Sub	N/A
521	GCTGATGCTGGACATACACCTATATTATTGGAAGCTAGAGATGTTCTGGGAGGAAAGGTCTATATGTTAATTCATAATATATTTTTATATTCGATCATAAATTAGTTTATAT	GCTGATGCTGGACATACACCTATATTATTGGAAGCTAGAGATGTTCTGGGAGGAAAGGTCTATATGTTAATTCATAATATATTTTTATGTTCGATCATAAATTAGTTTATAT	112	78	Sub	N/A
522	GCTGATGCTGGACATACACCTATATTATTGGAAGCTAGAGATGTTCTGGGAGGAAAGGTCTATATGTTAATTCATAATATATTTTTATATTCGATCATAAATTAGTTTATAT	GCTGATGCTGGACATACACCTATATTATTGGAAGCTAGAGATGTTCTGGGAGGAAAGGTCTAGATGTTAATTCATAATATATTTTTATATTCGATCATAAATTAGTTTATAT	112	78	Sub	N/A
523	GCTGATGCTGGACATACACCTATATTATTGGAAGCTAGAGATGTTCTGGGAGGAAAGGTCTATATGTTAATTCATAATATATTTTTATATTCGATCATAAATTAGTTTATAT	GCTGATGCTGGACATACACCTATATTATTGGAAGCTAGAGGTGTTTTAGGAGGAAATGTC----------TTCATAATACATTTTTATATTTGATCATAAATTAGTTTATAT	102	77	del	N/A
524	GCTGATGCTGGACATACACCTATATTATTGGAAGCTAGAGATGTTCTGGGAGGAAAGGTCTATA---TGTTAATTCATAATATATTTTT--------ATATTCGATCATAAATTAGTTTATAT	GCTGATGCTGGACATACACCTATATTATTGGAAGCTAGAGATGTTCAGGGGGGAAAGGTCTATATACTGTT-ATTCATAATA---TTTTCGAACACAATATTTGATCATAAATTAGTTTATAT	119	77	Ins	N/A
525	GCTGATGCTGGACATACACCTATATTATTGGAAGCTAGAGATGTTCTGGGAGGAAAGGTCTATATGTTAATTCATAATATATTTTTATATTCGATCATAAATTAGTTTATAT	GCTGATGCTGGACATACACCTATATTAGTGGACGCTAGAGATGTTCTGGGAGGAAAGGTCTATATGTTAATTCATAATATATTTTTATATTCGATCATAAATTAGTTTATAT	112	77	Sub	N/A
526	GCTGATGCTGGACATACACCTATATTATTGGAAGCTAGAGATGTTCTGGGAGGAAAGGTCTATATGTTAATTCATAATATATTTTTATATTCGATCATAAATTAGTTTATAT	GCTGATACTGGACATACACCTATATTATTGGAAGCTAGAGATGTTCTGGGAGGAAAGGTCTATATGTTAATTCATAATATATTTTTATATTCGATCATAAATTAGTTTATAT	112	76	Sub	N/A
527	GCTGATGCTGGACATACACCTATATTATTGGAAGCTAGAGATGTTCTGGGAGGAAAGGTCTATATGTTAATTCATAATATATTTTTATATTCGATCATAAATTAGTTTATAT	GCTGATGCTGGACATACACCTATATTATTGGAAGCTAGAGATGTTTTAGGAGGAAAGGTC----------TTCATAATATATTGTTATATTTGATCATAAATTAGTTTATAT	102	76	del	N/A
528	GCTGATGCTGGACATACACCTATATTATTGGAAGCTAGAGATGTTCTGGGAGGAAAGGTCTATATGTTAATTCATAATATATTTTTATATTCGATCATAAATTAGTTTATAT	GCTGATGCTGGACATACACCTATATTATTGGAAGCTAGAGATGTTTTAGGAGGAAATGTC----------TTCACAATACATTTTTATATTTGATCATAAATTAGTTTATAT	102	76	del	N/A
529	GCTGATGCTGGACATACACCTATATTATTGGAAGCTAGAGATGTTCTGGGAGGAAAGGTCTATATGTTAATTCATAATATATTTTTATATTCGATCATAAATTAGTTTATAT	GCTGATGCTGGACATACACCTATATTATTGGAAGCTAGAGATGTTCTGGGAGGAAAGGTCTATATGTTAATTCATAATATATTTTTATATTCGATCATAAATTAGCTTATAT	112	76	Sub	N/A
530	GCTGATGCTGGACATACACCTATATTATTGGAAGCTAGAGATGTTCTGGGAGGAAAGGTCTATATGTTAATTCATAATATATTTTTATA-TTCGATCATAAATTAGTTTATAT	GCTTATGCTGGACATACACCTATATTATTGGAAGCTAGAGATGTTTTAGGAGGAAAGGTC----------TTCATAATATATTTTTATATTTTGATCATAAATTAGTTTATAT	103	76	del	N/A
531	GCTGATGCTGGACATACACCTATATTATTGGAAGCTAGAGATGTTCTGGGAGGAAAGGTCTATATGTTAATTCATAATATATTTTTATATTCGATCATAAATTAGTTTATAT	GCTGATGCTGGACATACAACTATATTATTGGAAGCTAGAGATGTTTTAGGAGGAAAGGTC----------TTCATAATATATTTTTATATTTGATCATAAATTAGTTTATAT	102	76	del	N/A
532	GCTGATGCTGGACATACACCTATATTATTGGAAGCTAGAGATGTTCTGGGAGGAAAGGTCTATATGTTAATTCATAATATATTTTTATATTCGATCATAAATTAGTTTATAT	GCTGATGCTGGACATACACCTATATTATTGGAAGCTAGAGATGTTTTAGGAGGAAAGGTC----------TTCATGATATATTTTTATATTTGATCATAAATTAGTTTATAT	102	75	del	N/A
533	GCTGATGCTGGACATACACCTATATTATTGGAAGCTAGAGATGTTCTGGGAGGAAAGGTCTATATGTTAATTCATAATATATTTTTATATTCGATCATAAATTAGTTTATAT	GCTGATGCTGGACATACACCTATATTATTGGAAGCTAGAGATGTTTTAGGAGGAAATGTC----------TTCATAATACATTTTTATATTTGATCATAAACTAGTTTATAT	102	75	del	N/A
534	GCTGATGCTGGACATACACCTATATTATTGGAAGCTAGAGATGTTCTGGGAGGAAAGGTCTATATGTTAATTCATAATATATTTTTATATTCGATCATAAATTAGTTTATAT	GCTGATGCTGGACGTACACCTATATTATTGGAAGCTAGAGATGTTTTAGGAGGAAAGGTC----------TTCATAATATATTTTTATATTTGATCATAAATTAGTTTATAT	102	75	del	N/A
535	GCTGATGCTGGACATACACCTATATTATTGGAAGCTAGAGATGTTCTGGGAGGAAAGGTCTATATGTTAATTCATAATATATTTTTATATTCGATCATAAATTAGTTTATAT	GCTGATGCTGGACATACACCTATATTATTGGAAGCTAGAGATGTTTTAGGAGGAAAGGTC----------TTCATAATATATTTTTATATGTGATCATAAATTAGTTTATAT	102	75	del	N/A
536	GCTGATGCTGGACATACACCTATATTATTGGAAGCTAGAGATGTTCTGGGAGGAAAGGTCTATATGTTAATTCATAATATATTTTTATATTCGATCATAAATTAGTTTATAT	GCTGATGCTGGACATACACCTATATTATTGGAAGCTAGAGATGTTTTAGGAGGAAATGTC----------TTCATAATACATTTTTATATTTGATCATAAATTAGTTTATAC	102	75	del	N/A
537	GCTGATGCTGGACATACACCTATATTATTGGAAGCTAGAGATGTTCTGGGAGGAAAGGTCTATATGTTAATTCATAATATATTTTTATATTCGATCATAAATTAGTTTATAT	GCTGATGCTGGACATACACCTATATTATTGGAAGCTAGAGATGTTCTGGGATGAAAGGTCTATATGTTAATTCATAATATATTTTTATATTCGATCATAAATTAGTTTATAT	112	75	Sub	N/A
538	GCTGATGCTGGACATACACCTATATTATTGGAAGCTAGAGATGTTCTGGGAGGAAAGGTCTATATGTTAATTCATAATATATTTTTATATTCGATCATAAATTAGTTTATAT	GCTGATGCTGGACATACACCTATATTATTGGAAGCTAGAGATGTTTTAGGAGGAAAGGTC----------TTCATAATATATTTTTATATTTGATCATAAATTAGCTTATAT	102	74	del	N/A
539	GCTGATGCTGGACATACACCTATATTATTGGAAGCTAGAGATGTTCTGGGAGGAAAGGTCTATATGTTAATTCATAATATATTTTTATATTCGATCATAAATTAGTTTATAT	GCTGATGCTGGACATACACCTATATTATTGGAAGCTAGAGATGTTCTGGGAGGAAAGGTCTATATGTTAATTCATAATATATTATTATATTCGATCATAAATTAGTTTATAT	112	74	Sub	N/A
540	GCTGATGCTGGACATACACCTATATTATTGGAAGCTAGAGATGTTCTGGGAGGAAAGGTCTATA---TGTTAATTCATAATATATTTTT--------ATATTCGATCATAAATTAGTTTATAT	GCTGATGCTGGATATACACCTATATTATTGGAAGCTAGAGATGTTCTGGGGGGAAAGGTCTATATACTGTT-ATTCATAATA---TTTTCGAACACAATATTTGATCATAAATTAGTTTATAT	119	74	Ins	N/A
541	GCTGATGCTGGACATACACCTATATTATTGGAAGCTAGAGATGTTCTG-GGAGGAAAGGTCTATATGTTAATTCATAATATATTTTTATATTCGATCATAAATTAGTTTATAT	GCTGATGCTGGACATACACCTATATTATTGGAAGCTAGAGATGTT-TGAGGAGGAAAGGTC----------TTCATAATATATTTTTATATTTGATCATAAATTAGTTTATAT	102	74	del	N/A
542	GCTGATGCTGGACATACACCTATATTATTGGAAGCTAGAGATGTTCTGGGAGGAAAGGTCTATATGTTAATTCATAATATATTTTTATATTCGATCATAAATTAGTTTATAT	GCTGATGCTGGACATACACCTATATTATTGGAAGCTAAAGATGTTTTAGGAGGAAAGGTC----------TTCATAATATATTTTTATATTTGATCATAAATTAGTTTATAT	102	73	del	N/A
543	GCTGATGCTGGACATACACCTATATTATTGGAAGCTAGAGATGTTCTGGGAGGAAAGGTCTATATGTTAATTCATAATATATTTTTATATTCGATCATAAATTAGTTTATAT	GCTGATGCTGGACATGCACCTATATTATTGGAAGCTAGAGATGTTCTGGGAGGAAAGGTCTATATGTTAATTCATAATATATTTTTATATTCGATCATAAATTAGTTTATAT	112	73	Sub	N/A
544	GCTGATGCTGGACATACACCTATATTATTGGAAGCTAGAGATGTTCTGGGAGGAAAGGTCTATATGTTAATTCATAATATATTTTTATATTCGATCATAAATTAGTTTATAT	GCTGATGCTGGACATACACCTAGATTATTGGAAGCTAGAGATGTTCTGGGAGGAAAGGTCTATATGTTAATTCATAATATATTTTTATATTCGATCATAAATTAGTTTATAT	112	73	Sub	N/A
545	GCTGATGCTGGACATACACCTATATTATTGGAAGCTAGAGATGTTCTGGGAGGAAAGGTCTATATGTTAATTCATAATATATTTTTATATTCGATCATAAATTAGTTTATAT	GCTGATGCTGGACATACACCTATATTATTAGAAGCTAAAGATGTTCTATGAGGAAAGGTCTATATGTTAATTCATAATATATTTTTATATTCAATCATAAATTAGTTTATAT	112	73	Sub	N/A
546	GCTGATGCTGGACATACACCTATATTATTGGAAGCTAGAGATGTTCTGGGAGGAAAGGTCTATATGTTAATTCATAATATATTTTTATATTCGATCATAAATTAGTTTATAT	GCTGATGCTGGACATACACCTATATTATTGGAAGCTAGAGATGTTTTAGGAGGAAAGTTC----------TTCATAATATATTTTTATATTTGATCATAAATTAGTTTATAT	102	73	del	N/A
547	GCTGATGCTGGACATACACCTATATTATTGGAAGCTAGAGATGTTCTGGGAGGAAAGGTCTATATGTTAATTCATAATATATTTTTATATTCGATCATAAATTAGTTTATAT	GCTGATGCTGGACATACACCTATATTATTGGAAGCTAGAGATGTTTTAGGAGGAAATGTC----------TTCATAATACACTTTTATATTTGATCATAAATTAGTTTATAT	102	73	del	N/A
548	GCTGATGCTGGACATACACCTATATTATTGGAAGCTAGAGATGTTCTGGGAGGAAAGGTCTATATGTTAATTCATAATATATTTTTATATTCGATCATAAATTAGTTTATAT	GCTGATGCTGGACATACACCTATATTATTGGAAGCTAGAGATGTTTTAGGAGGAAATGTC----------TTCATAATACATTTTTATATTTGATCATAAATTAGTTCATAT	102	73	del	N/A
549	GCTGATGCTGGACATACACCTATATTATTGGAAGCTAGAGATGTTCTGGGAGGAAAGGTCTATATGTTAATTCATAATATATTTTTATATTCGATCATAAATTAGTTTATAT	GCTGATGCTGGACATACACCTATATTATTGCAAGCTAGAGATGTTTTAGGAGGAAAGGTC----------TTCATAATATATTTTTATATTTGATCATAAATTAGTTTATAT	102	72	del	N/A
550	GCTGATGCTGGACATACACCTATATTATTGGAAGCTAGAGATGTTCTGGGAGGAAAGGTCTATATGTTAATTCATAATATATTTTTATATTCGATCATAAATTAGTTTATAT	GCTGATGCTGGACATACACCTATATTATTGGAAGCTAGAGATGTTTTAGGAGGAAAGGTC----------TTCATAATATATTTTTATATTTGATCATCAATTAGTTTATAT	102	72	del	N/A
551	GCTGATGCTGGACATACACCTATATTATTGGAAGCTAGAGATGTTCTGGGAGGAAAGGTCTATATGTTAATTCATAATATATTTTTATA-TTCGATCATAAATTAGTTTATAT	GCTGATGCTGGACATACACCTATATTATTGGAAGCGAGAGATGTTTTAGGAGGAAAGGTC----------TTCATAATATATTTTTATATTTTGATCATAAATTAGTTTATAT	103	72	del	N/A
552	GCTGATGCTGGACATACACCTATATTATTGGAAGCTAGAGATGTTCTGGGAGGAAAGGTCTATATGTTAATTCATAATATATTTTTATATTCGATCATAAATTAGTTTATAT	GCTGATGCTGGACATACACCTATATTATTGGAAGCTAGAGATGTTCTGGGAGGAAAGGTCTATATGTTAATTCAGAATATATTTTTATATTCGATCATAAATTAGTTTATAT	112	72	Sub	N/A
553	GCTGATGCTGGACATACACCTATATTATTGGAAGCTAGAGATGTTCTGGGAGGAAAGGTCTATATGTTAATTCATAATATATTTTTATATTCGATCATAAATTAGTTTATAT	GCTGATGCTGGACATACACCTATATTATTGGAAGCTAGAGATGTTCTGGGAGGAAAGGTCTATATATTAATTCATAATATATTTTTATATTCGATCATAAATTAGTTTATAT	112	72	Sub	N/A
554	GCTGATGCTGGACATACACCTATATTATTGGAAGCTAGAGATGTTCTGGGAGGAAAGGTCTATATGTTAATTCATAATATATTTTTATATTCGATCATAAATTAGTTTATAT	GCTGATGCTGGACATACACCTATATTATTGGAAGCTAGAGATGTTATAGGAGGAAATGTC----------TTCATAATACATTTTTATATTTGATCATAAATTAGTTTATAT	102	71	del	N/A
555	GCTGATGCTGGACATACACCTATATTATTGGAAGCTAGAGATGTTCTGGGAGGAAAGGTCTATATGTTAATTCATAATATATTTTTATATTCGATCATAAATTAGTTTATAT	GCTGATGCTGGACATACACCTATATTATTGGAAGCTAGAGATGTTTTAGGAGGAAATGTC----------TTCATAATACATTTTTATATTTGATCATAAATTGGTTTATAT	102	71	del	N/A
556	GCTGATGCTGGACATACACCTATATTATTGGAAGCTAGAGATGTTCTGGGAGGAAAGGTCTATATGTTAATTCATAATATATTTTTATATTCGATCATAAATTAGTTTATAT	GCTAATGCTGGACATACACCTATATTATTGGAAGCTAGAGATGTTTTAGGAGGAAATGTC----------TTCATAATATATTTTTATATTTGATCATAAATTAGTTTATAT	102	71	del	N/A
557	GCTGATGCTGGACATACACCTATATTATTGGAAGCTAGAGATGTTCTGGGAGGAAAGGTCTATATGTTAATTCATAATATATTTTTATATTCGATCATAAATTAGTTTATAT	GCTGATGCTGGACATACACCTATATTATTGGAAGCTAGAGATGTTTTAGGAGGAAAGGTC----------TTCATACTATATTTTTATATTTGATCATAAATTAGTTTATAT	102	70	del	N/A
558	GCTGATGCTGGACATACACCTATATTATTGGAAGCTAGAGATGTTCTGGGAGGAAAGGTCTATATGTTAATTCATAATATATTTTTATATTCGATCATAAATTAGTTTATAT	GCTGATGCTGGACATACACCTATATTATTGGAAGCTAGAGATGTTTTAGGAGGAAATGTC----------TTCATAATGCATTTTTATATTTGATCATAAATTAGTTTATAT	102	70	del	N/A
559	GCTGATGCTGGACATACACCTATATTATTGGAAGCTAGAGATGTTCTGGGAGGAAAGGTCTATATGTTAATTCATAATATATTTTTATATTCGATCATAAATTAGTTTATAT	GCTGATGCTGGACATACACCTATATTATTGGAAGCTAGAGATGTTCTGGGAGGACAGGTCTATATGTTAATTCATAATATATTTTTATATTCGATCATAAATTAGTTTATAT	112	70	Sub	N/A
560	GCTGATGCTGGACATACACCTATATTATTGGAAGCTAGAGATGTTCTGGGAGGAAAGGTCTATATGTTAATTCATAATATATTTTTATATTCGATCATAAATTAGTTTATAT	GCTGATGCTGGACATACACCTATAATATTGGAAGCTAGAGATGTTCTGGGAGGAAAGGTCTATATGTTAATTCATAATATATTTTTATATTCGATCATAAATTAGTTTATAT	112	70	Sub	N/A
561	GCTGATGCTGGACATACACCTATATTATTGGAAGCTAGAGATGTTCTGGGAGGAAAGGTCTATA---TGTTAATTCATAATATATTTTT--------ATATTCGATCATAAATTAGTTTATAT	GCTGATGCTGGACATACACCTATATTATTGGAAGCTAGAGATGTGCTGGGGGGAAAGGTCTATATACTGTT-ATTCATAATA---TTTTCGAACACAATATTTGATCATAAATTAGTTTATAT	119	70	Ins	N/A
562	GCTGATGCTGGACATACACCTATATTATTGGAAGCTAGAGATGTTCTGGGAGGAAAGGTCTATATGTTAATTCATAATATATTTTTATATTCGATCATAAATTAGTTTATAT	GCTGATGCTGGACATACACCTATATTATTGGAAGCTAGAGATGTTCTGGGAGGAAAGGTCTATATGTTAATTCATAATATA-TTTTATATTCGATCATAAATTAGTTTATAT	111	70	del	N/A
563	GCTGATGCTGGACATACACCTATATTATTGGAAGCTAGAGATGTTCTGGGAGGAAAGGTCTATATGTTAATTCATAATATATTTTTATATTCGATCATAAATTAGTTTATAT	GCTGATGCTGGACATACACCTATATTATTGGAAGCTAGAGATGTTTTAGGAGGAAAGGTC----------TTCATAATATATTTTTATATTTGATCATAAATTAGTTTACAT	102	70	del	N/A
564	GCTGATGCTGGACATACACCTATATTATTGGAAGCTAGAGATGTTCTGGGAGGAAAGGTCTATATGTTAATTCATAATATATTTTTATATTCGATCATAAATTAGTTTATAT	GCTGATGCTGGACATACACCTATATTATTGGAAGCTAGAGATGTTCTGGGAGGAAAGGTCTATATGTTAATTCATAATATATTTTTATATTCGATCATAAATTAGTGTATAT	112	70	Sub	N/A
565	GCTGATGCTGGACATACACCTATATTATTGGAAGCTAGAGATGTTCTGGGAGGAAAGGTCTATATGTTAATTCATAATATATTTTTATATTCGATCATAAATTAGTTTATAT	GCTGATGCTGGACATACACCTATATTATTGGAAGCTAGAGATGTTTTAGGAGGAAATGTC----------TTCATAATACATTTGTATATTTGATCATAAATTAGTTTATAT	102	70	del	N/A
566	GCTGATGCTGGACATACACCTATATTATTGGAAGCTAGAGATGTTCTGGGAGGAAAGGTCTATATGTTAATTCATAATATATTTTTATATTCGATCATAAATTAGTTTATAT	GCTGATGCTGGACATACACCTATATTAGTGGACGCTAGAGATGTTTTAGGAGGAAAGGTC----------TTCATAATATATTTTTATATTTGATCATAAATTAGTTTATAT	102	69	del	N/A
567	GCTGATGCTGGACATACACCTATATTATTGGAAGCTAGAGATGTTCTGGGAGGAAAGGTCTATATGTTAATTCATAATATATTTTTATATTCGATCATAAATTAGTTTATAT	GCTGATGCTGGACATACACCTATATTATTGGAAGCTAGAGATGTTTTAGGAGGAAAGGTC----------TTCATAATATATTTTTACATTTGATCATAAATTAGTTTATAT	102	68	del	N/A
568	GCTGATGCTGGACATACACCTATATTATTGGAAGCTAGAGATGTTCTGGGAGGAAAGGTCTATATGTTAATTCATAATATATTTTTATATTCGATCATAAATTAGTTTATAT	GCTGATGCTGGAGATACACCTATATTATTGGAAGCTAGAGATGTTTTAGGAGGAAATGTC----------TTCATAATACATTTTTATATTTGATCATAAATTAGTTTATAT	102	68	del	N/A
569	GCTGATGCTGGACATACACCTATATTATTGGAAGCTAGAGATGTTCTGGGAGGAAAGGTCTATATGTTAATTCATAATATATTTTTATATTCGATCATAAATTAGTTTATAT	GCTGATGCTGGACATACACCTATATTATTGGAAGCTAGAGATGATTTAGGAGGAAAGGTC----------TTCATAATATATTTTTATATTTGATCATAAATTAGTTTATAT	102	67	del	N/A
570	GCTGATGCTGGACATACACCTATATTATTGGAAGCTAGAGATGTTCTGGGAGGAAAGGTCTATATGTTAATTCATAATATATTTTTATATTCGATCATAAATTAGTTTATAT	GCTGATGCTGGACATACACCTATATTATTGGAAGCTAGAGATGTTTTAGGAGGAAAGGTC----------TTCATAATATATTTTTATATTTGATAATAAATTAGTTTATAT	102	67	del	N/A
571	GCTGATGCTGGACATACACCTATATTATTGGAAGCTAGAGATGTTCTGGGAGGAAAGGTCTATATGTTAATTCATAATATATTTTTATATTCGATCATAAATTAGTTTATAT	GCTGATGCTGGACATACACCTATATTATTGGAAGCTAGAGATGTTTTAGGAGGAAAGGTC----------TTCATAATATATTTTTATATTTGATCACAAATTAGTTTATAT	102	67	del	N/A
572	GCTGATGCTGGACATACACCTATATTATTGGAAGCTAGAGATGTTCTGGGAGGAAAGGTCTATATGTTAATTCATAATATATTTTTATA-TTCGATCATAAATTAGTTTATAT	GCTGATGCTGGACATACACCTATATTAGTGGAAGCTAGAGATGTTTTAGGAGGAAAGGTC----------TTCATAATATATTTTTATATTTTGATCATAAATTAGTTTATAT	103	66	del	N/A
573	GCTGATGCTGGACATACACCTATATTATTGGAAGCTAGAGATGTTCTGGGAGGAAAGGTCTATA---TGTTAATTCATAATATATTTTT--------ATATTCGATCATAAATTAGTTTATAT	GCTGATGCTGGACATACACCTATATTATTGGAAGCTAGAGCTGTTCTGGGGGGAAAGGTCTATATACTGTT-ATTCATAATA---TTTTCGAACACAATATTTGATCATAAATTAGTTTATAT	119	66	Ins	N/A
574	GCTGATGCTGGACATACACCTATATTATTGGAAGCTAGAGATGTTCTGGGAGGAAAGGTCTATATGTTAATTCATAATATATTTTTATATTCGATCATAAATTAGTTTATAT	GCTGATGCTGGACATACACCTATATTATTGGAAGCTAGAGATGTTTTAGGAGGAAATGTC----------TTCATAATACATTTTTATATTTGATCATAAATTAGTCTATAT	102	66	del	N/A
575	GCTGATGCTGGACATACACCTATATTATTGGAAGCTAGAGATGTTCTGGGAGGAAAGGTCTATATGTTAATTCATAATATATTTTTATATTCGATCATAAATTAGTTTATAT	GCTGATGCTGGACATACACCTATATTATTGGCAGCTAGCGATGTTCTGGGAGGAAAGGTCTATATGTTAATTCATAATATATTTTTATATTCGATCATAAATTAGTTTATAT	112	66	Sub	N/A
576	GCTGATGCTGGACATACACCTATATTATTGGAAGCTAGAGATGTTCTGGGAGGAAAGGTCTATATGTTAATTCATAATATATTTTTATATTCGATCATAAATTAGTTTATAT	GCTGATGCTGGACATACACCTATATTATTGGAAGCTAAAGATGTTTTAGGAGGAAATGTC----------TTCATAATACATTTTTATATTTGATCATAAATTAGTTTATAT	102	66	del	N/A
577	GCTGATGCTGGACATACACCTATATTATTGGAAGCTAGAGATGTTCTGGGAGGAAAGGTCTATATGTTAATTCATAATATATTTTTATATTCGATCATAAATTAGTTTATAT	GCTGATGCTGGACATACACCTATATTATTGGAAGCTAGAGATGTTTCAGGAGGAAATGTC----------TTCATAATACATTTTTATATTTGATCATAAATTAGTTTATAT	102	65	del	N/A
578	#NAME?	GCTGATGCTGGACATACACCGCTGATGCTGGACATACACCGCTGATGCTGGACATACACCGCTGATGCTGGACATACACCTATATTATTGGAAGCTAGAGATGTTCTGGGAGGAAAGGTCTATATGTTAATTCATAATATATTTTTATATTCGATCATAAATTAGTTTATAT	172	65	Ins	N/A
579	GCTGATGCTGGACATACACCTATATTATTGGAAGCTAGAGATGTTCTGGGAGGAAAGGTCTATATGTTAATTCATAATATATTTTTATATTCGATCATAAATTAGTTTATAT	GCTGATGCTGGACATACACCTATATTATTGGAAGCTAGAGATGTTTTAGGAGGAAAGGTC----------TTCATAATATACTTTTATATTTGATCATAAATTAGTTTATAT	102	65	del	N/A
580	GCTGATGCTGGACATACACCTATATTATTGGAAGCTAGAGATGTTCTGGGAGGAAAGGTCTATATGTTAATTCATAATATATTTTTATATTCGATCATAAATTAGTTTATAT	GCTGATGCTGGACATACACCTATATTATTGGAAGNTAGAGATGTTCTGGGAGGAAAGGTCTATATGTTAATTCATAATATATTTTTATATTCGATCATAAATTAGTTTATAT	112	65	Sub	N/A
581	GCTGATGCTGGACATACACCTATATTATTGGAAGCTAGAGATGTTCTGGGAGGAAAGGTCTATATGTTAATTCATAATATATTTTTATATTCGATCATAAATTAGTTTATAT	GCTGATGCTGGACATACACCTATATTATTGGAAGCTAGAGATGTTCTGGGAGGAAAGGTCTATATGTTAATTCATACTATATTTTTATATTCGATCATAAATTAGTTTATAT	112	64	Sub	N/A
582	GCTGATGCTGGACATACACCTATATTATTGGAAGCTAGAGATGTTCTGGGAGGAAAGGTCTATATGTTAATTCATAATATATTTTTATATTCGATCATAAATTAGTTTATAT	GCTGATGCTGGACATACACCTATATTATTGGAAGCTAGAGATGTTTTAGGAGGAAAGGTC----------TTCATAATATATTTTTATATTTGATCATAAATTGGTTTATAT	102	64	del	N/A
583	GCTGATGCTGGACATACACCTATATTATTGGAAGCTAGAGATGTTCTGGGAGGAAAGGTCTATATGTTAATTCATAATATATTTTTATATTCGATCATAAATTAGTTTATAT	GCTGATGCTGAACATACACCTATATTATTGGAAGCTAGAGATGTTTTAGGAGGAAAGGTC----------TTCATAATATATTTTTATATTTGATCATAAATTAGTTTATAT	102	64	del	N/A
584	GCTGATGCTGGACATACACCTATATTATTGGAAGCTAGAGATGTTCTGGGAGGAAAGGTCTATATGTTAATTCATAATATATTTTTATATTCGATCATAAATTAGTTTATAT	GCTGATGCTGGACATACACCTATATTATTGGAAGCTAGAGATGTTTTAGGAGGAAATGTC----------TTCATAATACATTTTCATATTTGATCATAAATTAGTTTATAT	102	64	del	N/A
585	GCTGATGCTGGACATACACCTATATTATTGGAAGCTAGAGATGTTCTGGGAGGAAAGGTCTATATGTTAATTCATAATATATTTTTATATTCGATCATAAATTAGTTTATAT	GCTGATGCTGGACATACACCTACATTATTGGAAGCTAGAGATGTTTTAGGAGGAAAGGTC----------TTCATAATATATTTTTATATTTGATCATAAATTAGTTTATAT	102	64	del	N/A
586	GCTGATGCTGGACATACACCTATATTATTGGAAGCTAGAGATGTTCTGGGAGGAAAGGTCTATATGTTAATTCATAATATATTTTTATATTCGATCATAAATTAGTTTATAT	GCTGATGCTGGACATACACCTAGATTATTGGAAGCTAGAGATGTTTTAGGAGGAAATGTC----------TTCATAATACATTTTTATATTTGATCATAAATTAGTTTATAT	102	64	del	N/A
587	#NAME?	GCTGATGCTGGACATACACCGCTGATGCTGGACATACACCGCTGATGCTGGACATACACCGCTGATGCTGGACATACACCTATATTATTGGAAGCTAGAGATGTTTTAGGAGGAAATGTC----------TTCATAATACATTTTTATATTTGATCATAAATTAGTTTATAT	162	64	Ins	N/A
588	GCTGATGCTGGACATACACCTATATTATTGGAAGCTAGAGATGTTCTGGGAGGAAAGGTCTATATGTTAATTCATAATATATTTTTATATTCGATCATAAATTAGTTTATAT	GCTGATGCTGGACATACACCTATATTATTGGAAGCTAAAGATGTTCTAGGAGGAAAGGTCTATATGTTAATTCATAATATATTTTTATATTTGATCATAAATTAGTTTATAT	112	64	Sub	N/A
589	GCTGATGCTGGACATACACCTATATTATTGGAAGCTAGAGATGTTCTGGGAGGAAAGGTCTATATGTTAATTCATAATATATTTTTATATTCGATCATAAATTAGTTTATAT	GCTGATGCTGGACATACACCTATATTATTGGAAGCTAGAGATGTTCTGGGAGGAAAGGTCTATATGTTAATTCATAATATATTTTTATATTGGATCATAAATTAGTTTATAT	112	64	Sub	N/A
590	GCTGATGCTGGACATACACCTATATTATTGGAAGCTAGAGATGTTCTGGGAGGAAAGGTCTATATGTTAATTCATAATATATTTTTATATTCGATCATAAATTAGTTTATAT	GCTGATGCTGGGCATACACCTATATTATTGGAAGCTAGAGATGTTTTAGGAGGAAATGTC----------TTCATAATATATTTTTATATTTGATCATAAATTAGTTTATAT	102	64	del	N/A
591	GCTGATGCTGGACATACACCTATATTATTGGAAGCTAGAGATGTTCTGGGAGGAAAGGTCTATATGTTAATTCATAATATATTTTTATATTCGATCATAAATTAGTTTATAT	GCTGATGCTGGACATACACCTATATTATNGGAAGCTAGAGATGTTTTAGGAGGAAAGGTC----------TTCATAATATATTTTTATATTTGATCATAAATTAGTTTATAT	102	64	del	N/A
592	GCTGATGCTGGACATACACCTATATTATTGGAAGCTAGAGATGTTCTGGGAGGAAAGGTCTATATGTTAATTCATAATATATTTTTATATTCGATCATAAATTAGTTTATAT	GCTGATGCTAGACATACACCTATATTATTGGAAGCTAGAGATGTTTTAGGAGGAAAGGTC----------TTCATAATATATTTTTATATTTGATCATAAATTAGTTTATAT	102	63	del	N/A
593	GCTGATGCTGGACATACACCTATATTATTGGAAGCTAGAGATGTTCTGGGAGGAAAGGTCTATATGTTAATTCATAATATATTTTTATATTCGATCATAAATTAGTTTATAT	GCTGATGCTGGATATACACCTATATTATTGGAAGCTAGAGATGTTTTAGGAGGAAATGTC----------TTCATAATATATTTTTATATTTGATCATAAATTAGTTTATAT	102	63	del	N/A
594	GCTGATGCTGGACATACACCTATATTATTGGAAGCTAGAGATGTTCTGGGAGGAAAGGTCTATATGTTAATTCATAATATATTTTTATATTCGATCATAAATTAGTTTATAT	CCTGATGCTGGACATACACCTATATTATTGGAAGCTAGAGATGTTTTAGGAGGAAATGTC----------TTCATAATACATTTTTATATTTGATCATAAATTAGTTTATAT	102	63	del	N/A
595	GCTGATGCTGGACATACACCTATATTATTGGAAGCTAGAGATGTTCTGGGAGGAAAGGTCTATATGTTAATTCATAATATATTTTTATATTCGATCATAAATTAGTTTATAT	GCTGATGGTGGACATACACCTATATTATTGGAAGCTAGAGATGTTCTGGGAGGAAAGGTCTATATGTTAATTCATAATATATTTTTATATTCGATCATAAATTAGTTTATAT	112	63	Sub	N/A
596	GCTGATGCTGGACATACACCTATATTATTGGAAGCTAGAGATGTTCTGGGAGGAAAGGTCTATATGTTAATTCATAATATATTTTTATATTCGATCATAAATTAGTTTATAT	GCTGATGCTGGACATACACCTATATTATTGGAAGCTAGAGATGTTTTAGGAGGAAATGTC----------TTCATAATACATTTTTATATGTGATCATAAATTAGTTTATAT	102	63	del	N/A
597	#NAME?	GCTGATGCTGGACATACACCGCTGATGCTGGACATACACCTATACTATTGGAAGCTAGAGATGTTTTAGGAGGAAAGGTC----------TTCATAATATGTTTTTATATTTGATCATAAATTAGTTTATAT	122	62	Ins	N/A
598	GCTGATGCTGGACATACACCTATATTATTGGAAGCTAGAGATGTTCTGGGAGGAAAGGTCTATATGTTAATTCATAATATATTTTTATATTCGATCATAAATTAGTTTATAT	GCTGATGCTGAACATACACCTATATTATTGGAAGCTAGAGATGTTTTAGGAGGAAATGTC----------TTCATAATACATTTTTATATTTGATCATAAATTAGTTTATAT	102	62	del	N/A
599	GCTGATGCTGGACATACACCTATATTATTGGAAGCTAGAGATGTTCTGGGAGGAAAGGTCTATATGTTAATTCATAATATATTTTTATATTCGATCATAAATTAGTTTATAT	GCTGATGCTGGACATACACCTATATTATTGGAAGCTAGAGATGTTTTAGGAGGAAATGTC----------TTCATAATACATTTTTATATTTGGTCATAAATTAGTTTATAT	102	61	del	N/A
600	GCTGATGCTGGACATACACCTATATTATTGGAAGCTAGAGATGTTCTGGGAGGAAAGGTCTATA---TGTTAATTCATAATATATTTTT--------ATATTCGATCATAAATTAGTTTATAT	GCTAATGCTGGACATACACCTATATTATTGGAAGCTAGAGATGTTCTGGGGGGAAAGGTCTATATACTGTT-ATTCATAATA---TTTTCGAACACAATATTTGATCATAAATTAGTTTATAT	119	61	Ins	N/A
601	GCTGATGCTGGACATACACCTATATTATTGGAAGCTAGAGATGTTCTGGGAGGAAAGGTCTATATGTTAATTCATAATATATTTTTATATTCGATCATAAATTAGTTTATAT	GCTGATGCTGGACATACACCTATATTATTGGAAGCTAGAGATGTT-TAGGAGGAAAGGTC----------TTCATAATATATTTTTATATTTGATCATAAATTAGTTTATAT	101	61	del	N/A
602	GCTGATGCTGGACATACACCTATATTATTGGAAGCTAGAGATGTTCTGGGAGGAAAGGTCTATATGTTAATTCATAATATATTTTTATATTCGATCATAAATTAGTTTATAT	GCTGATGCTGGACATACACCTATATTATTGGAAGCTAGAGATGTTTTAGGAGGAAACGTC----------TTCATAATACATTTTTATATTTGATCATAAATTAGTTTATAT	102	61	del	N/A
603	GCTGATGCTGGACATACACCTATATTATTGGAAGCTAGAGATGTTCTGGGAGGAAAGGTCTATATGTTAATTCATAATATATTTTTATA-TTCGATCATAAATTAGTTTATAT	GCTGAGGCTGGACATACACCTATATTATTGGAAGCTAGAGATGTTTTAGGAGGAAAGGTC----------TTCATAATATATTTTTATATTTTGATCATAAATTAGTTTATAT	103	61	del	N/A
604	GCTGATGCTGGACATACACCTATATTATTGGAAGCTAGAGATGTTCTGGGAGGAAAGGTCTATATGTTAATTCATAATATATTTTTATATTCGATCATAAATTAGTTTATAT	GCTGATGCTGGACATACACCTATATTATTGGAAGCTAGAGATGTTTTAGGAGGAAATGTC----------TTCATGATACATTTTTATATTTGATCATAAATTAGTTTATAT	102	61	del	N/A
605	GCTGATGCTGGACATACACCTATATTATTGGAAGCTAGAGATGTTCTGGGAGGAAAGGTCTATATGTTAATTCATAATATATTTTTATA-TTCGATCATAAATTAGTTTATAT	GCTGATGCTGGACATACACCTATATGATTGGAAGCTAGAGATGTTTTAGGAGGAAAGGTC----------TTCATAATATATTTTTATATTTTGATCATAAATTAGTTTATAT	103	61	del	N/A
606	GCTGATGCTGGACATACACCTATATTATTGGAAGCTAGAGATGTTCTGGGAGGAAAGGTCTATATGTTAATTCATAATATATTTTTATATTCGATCATAAATTAGTTTATAT	GCTGATGCTGGACATACACCTATATTATTGGAAGCTCGAGATGTTTTAGGAGGAAAGGTC----------TTCATAATATATTTTTATATTTGATCATAAATTAGTTTATAT	102	60	del	N/A
607	GCTGATGCTGGACATACACCTATATTATTGGAAGCTAGAGATGTTCTGGGAGGAAAGGTCTATA---TGTTAATTCATAATATATTTTT--------ATATTCGATCATAAATTAGTTTATAT	GCTGATGCTGGACATACACCTATATTATTGGAAGCTAGAGATGTTCTGGG-GGAAAGGTCTATATACTGTT-ATTCATAATA---TTTTCGAACACAATATTTGATCATAAATTAGTTTATAT	118	60	Ins	N/A
608	GCTGATGCTGGACATACACCTATATTATTGGAAGCTAGAGATGTTCTGGGAGGAAAGGTCTATATGTTAATTCATAATATATTTTTATATTCGATCATAAATTAGTTTATAT	GCTGATGCTGGACATACACCTATATTATTGGAAGCTAGAGATGTTCTGGGAGGAAAGGTCTATATGTTAATTCATAATATAATTTTATATTCGATCATAAATTAGTTTATAT	112	60	Sub	N/A
609	GCTGATGCTGGACATACACCTATATTATTGGAAGCTAGAGATGTTCTGGGAGGAAAGGTCTATATGTTAATTCATAATATATTTTTATATTCGATCATAAATTAGTTTATAT	GCTGATGCTGGACATACACCTATATTATTGGAAGCTAGAGATTTTTTAGGAGGAAAGGTC----------TTCATAATATATTTTTATATTTGATCATAAATTAGTTTATAT	102	60	del	N/A
610	GCTGATGCTGGACATACACCTATATTATTGGAAGCTAGAGATGTTCTGGGAGGAAAGGTCTATATGTTAATTCATAATATATTTTTATATTCGATCATAAATTAGTTTATAT	GCTGATGCTGGACATACACCTATATTATTGGAAGCTAGAGATGTTCTGGGAGGAAAGGTCTATATGTTAATTCATAATATATTTTTATATTCGATCATAAATTATTTTATAT	112	60	Sub	N/A
611	GCTGATGCTGGACATACACCTATATTATTGGAAGCTAGAGATGTTCTGGGAGGAAAGGTCTATATGTTAATTCATAATATATTTTTATATTCGATCATAAATTAGTTTATAT	GCTGATGCTAGACATACACCTATATTATTGGAAGCTAGAGATGTTTTAGGAGGAAATGTC----------TTCATAATACATTTTTATATTTGATCATAAATTAGTTTATAT	102	60	del	N/A
612	GCTGATGCTGGACATACACCTATATTATTGGAAGCTAGAGATGTTCTGGGAGGAAAGGTCTATATGTTAATTCATAATATATTTTTATATTCGATCATAAATTAGTTTATAT	GCTGATGCTGGACATACACCTATATTATTGGAAGCTAGAGATGTTTTAGGAGGAAATGTC----------TTCATAATACATTTTTATATTTGATCGTAAATTAGTTTATAT	102	60	del	N/A
613	GCTGATGCTGGACATACACCTATATTATTGGAAGCTAGAGATGTTCTGGGAGGAAAGGTCTATA---TGTTAATTCATAATATATTTTT--------ATATTCGATCATAAATTAGTTTATAT	GCTGATGCTGGACATACACCTATATTATTGGAATCTAGAGATGTTCTGGGGGGAAAGGTCTATATACTGTT-ATTCATAATA---TTTTCGAACACAATATTTGATCATAAATTAGTTTATAT	119	60	Ins	N/A
614	GCTGATGCTGGACATACACCTATATTATTGGAAGCTAGAGATGTTCTGGGAGGAAAGGTCTATATGTTAATTCATAATATATTTTTATATTCGATCATAAATTAGTTTATAT	GCTGATGCTGGACATACACCTATATTATTGGAAGCTAGAGATGTTTTAGGAGGAAAGGTC----------TTCATAATATATTTTTATACTTGATCATAAATTAGTTTATAT	102	60	del	N/A
615	GCTGATGCTGGACATACACCTATATTATTGGAAGCTAGAGATGTTCTGGGAGGAAAGGTCTATATGTTAATTCATAATATATTTTTATATTCGATCATAAATTAGTTTATAT	GCTGATACTGGACATACACCTATATTATTGGAAGCTAGAGATGTTTTAGGAGGAAAGGTC----------TTCATAATATATTTTTATATTTGATCATAAATTAGTTTATAT	102	59	del	N/A
616	GCTGATGCTGGACATACACCTATATTATTGGAAGCTAGAGATGTTCTGGGAGGAAAGGTCTATATGTTAATTCATAATATATTTTTATATTCGATCATAAATTAGTTTATAT	GCTGATGCTGGACATACACCTATATTATTGGAAGCTAGAGATGTTTTAGGAGGAAATGTC----------TTCATAATACATGTTTATATTTGATCATAAATTAGTTTATAT	102	59	del	N/A
617	GCTGATGCTGGACATACACCTATATTATTGGAAGCTAGAGATGTTCTGGGAGGAAAGGTCTATATGTTAATTCATAATATATTTTTATATTCGATCATAAATTAGTTTATAT	GCTGATGCTGGACATACACCTATATTATTGGAAGCTAGAGATGTTTTAAGAGGAAAGGTC----------TTCATAATACATTTTTATATTTGATCATAAATTAGTTTATAT	102	59	del	N/A
618	GCTGATGCTGGACATACACCTATATTATTGGAAGCTAGAGATGTTCTGGGAGGAAAGGTCTATATGTTAATTCATAATATATTTTTATATTCGATCATAAATTAGTTTATAT	GCTGATGCTGGACATACACCTATATTATTGGAAGCTAGAGATGTTCTGGGAGGAAAGGTCTATATGTTAATTCATAATATATTTTTATATTCCATCATAAATTAGTTTATAT	112	59	Sub	N/A
619	GCTGATGCTGGACATACACCTATATTATTGGAAGCTAGAGATGTTCTGGGAGGAAAGGTCTATATGTTAATTCATAATATATTTTTATATTCGATCATAAATTAGTTTATAT	GCTGATGCTGGACATACACCTATATTATTGGAAGCTAGCGATGTTTTAGGAGGAAATGTC----------TTCATAATACATTTTTATATTTGATCATAAATTAGTTTATAT	102	59	del	N/A
620	GCTGATGCTGGACATACACCTATATTATTGGAAGCTAGAGATGTTCTGGGAGGAAAGGTCTATATGTTAATTCATAATATATTTTTATATTCGATCATAAATTAGTTTATAT	GCTGATGCTGGACATACACCTATATTATTGGAAGCTAGAGATGTTCTGGGAGGAAAGGTCTCTATGTTAATTCATAATATATTTTTATATTCGATCATAAATTAGTTTATAT	112	59	Sub	N/A
621	GCTGATGCTGGACATACACCTATATTATTGGAAGCTAGAGATGTTCTGGGAGGAAAGGTCTATATGTTAATTCATAATATATTTTTATATTCGATCATAAATTAGTTTATAT	GCTGATGCTGGACATACACCTATATTATTGGAAGCTAGAGATGTTTTAGGAGGAAAGGTC----------TTCATAATATATTTTTATGTTTGATCATAAATTAGTTTATAT	102	59	del	N/A
622	GCTGATGCTGGACATACACCTATATTATTGGAAGCTAGAGATGTTCTGGGAGGAAAGGTCTATATGTTAATTCATAATATATTTTTATATTCGATCATAAATTAGTTTATAT	GCTGATGCTGGACATACACCTATATTATTGGCAGCTAGAGATGTTTTAGGAGGAAATGTC----------TTCATAATATATTTTTATATTTGATCATAAATTAGTTTATAT	102	59	del	N/A
623	GCTGATGCTGGACATACACCTATATTATTGGAAGCTAGAGATGTTCTGGGAGGAAAGGTCTATATGTTAATTCATAATATATTTTTATATTCGATCATAAATTAGTTTATAT	GCTGATGCTGGACATACACCTATATTAGTGGATGCTAGAGATGTTCTGGGAGGAAAGGTCTATATGTTAATTCATAATATATTTTTATATTCGATCATAAATTAGTTTATAT	112	59	Sub	N/A
624	GCTGATGCTGGACATACACCTATATTATTGGAAGCTAGAGATGTTCTGGGAGGAAAGGTCTATATGTTAATTCATAATATATTTTTATATTCGATCATAAATTAGTTTATAT	GCTGATGCTGGACATGCACCTATATTATTGGAAGCTAGAGATGTTTTAGGAGGAAAGGTC----------TTCATAATATATTTTTATATTTGATCATAAATTAGTTTATAT	102	58	del	N/A
625	GCTGATGCTGGACATACACCTATATTATTGGAAGCTAGAGATGTTCTGGGAGGAAAGGTCTATATGTTAATTCATAATATATTTTTATATTCGATCATAAATTAGTTTATAT	GCTGATGCTGGACATACACCTATATTATTGGAAGCTAGAAATGTTTTAGGAGGAAATGTC----------TTCATAATACATTTTTATATTTGATCATAAATTAGTTTATAT	102	58	del	N/A
626	GCTGATGCTGGACATACACCTATATTATTGGAAGCTAGAGATGTTCTGGGAGGAAAGGTCTATATGTTAATTCATAATATATTTTTATATTCGATCATAAATTAGTTTATAT	GCTGATGCTGGACATACACCTATATTATTGGAAGCTAGAGATGTTTTAGTAGGAAAGGTC----------TTCATAATATATTTTTATATTTGATCATAAATTAGTTTATAT	102	58	del	N/A
627	GCTGATGCTGGACATACACCTATATTATTGGAAGCTAGAGATGTTCTGGGAGGAAAGGTCTATATGTTAATTCATAATATATTTTTATATTCGATCATAAATTAGTTTATAT	GCTGATGCTGGACATACACCTGTATTATTGGAAGCTAGAGATGTTTTAGGAGGAAAGGTC----------TTCATAATATATTTTTATATTTGATCATAAATTAGTTTATAT	102	58	del	N/A
628	GCTGATGCTGGACATACACCTATATTATTGGAAGCTAGAGATGTTCTGGGAGGAAAGGTCTATATGTTAATTCATAATATATTTTTATATTCGATCATAAATTAGTTTATAT	GCTGATGCTGGACATACACCTATATTATTGGAAGCTAAAGATGTTCTAGGAGGAAAGGTC----------TTCATAATATATTTTTATATTTGATCATAAATTAGTTTATAT	102	58	del	N/A
629	GCTGATGCTGGACATACACCTATATTATTGGAAGCTAGAGATGTTCTGGGAGGAAAGGTCTATATGTTAATTCATAATATATTTTTATATTCGATCATAAATTAGTTTATAT	GCTGATGCTGGACTTACACCTATACTATTGGAAGCTAGAGATGTTTTAGGAGGAAAGGTC----------TTCATAATATGTTTTTATATTTGATCATAAATTAGTTTATAT	102	58	del	N/A
630	GCTGATGCTGGACATACACCTATATTATTGGAAGCTAGAGATGTTCTGGGAGGAAAGGTCTATATGTTAATTCATAATATATTTTTATATTCGATCATAAATTAGTTTATAT	GCTGATGCTGGACATACACCTATATTATTGGAACCTAGAGATGTTTTAGGAGGAAAGGTC----------TTCATAATATATTTTTATATTTGATCATAAATTAGTTTATAT	102	58	del	N/A
631	GCTGATGCTGGACATACACCTATATTATTGGAAGCTAGAGATGTTCTGGGAGGAAAGGTCTATATGTTAATTCATAATATATTTTTATATTCGATCATAAATTAGTTTATAT	GCTGATGCTGGACATACACCTATTTTATTGGAAGCTAGAGATGTTTTAGGAGGAAAGGTC----------TTCATAATATATTTTTATATTTGATCATAAATTAGTTTATAT	102	58	del	N/A
632	GCTGATGCTGGACATACACCTATATTATTGGAAGCTAGAGATGTTCTGGGAGGAAAGGTCTATATGTTAATTCATAATATATTTTTATATTCGATCATAAATTAGTTTATAT	GCTGATGCTGGACATACACCTATATTATTGCAAGCTAGAGATGTTTTAGGAGGAAATGTC----------TTCATAATACATTTTTATATTTGATCATAAATTAGTTTATAT	102	57	del	N/A
633	GCTGATGCTGGACATACACCTATATTATTGGAAGCTAGAGATGTTCTGGGAGGAAAGGTCTATATGTTAATTCATAATATATTTTTATATTCGATCATAAATTAGTTTATAT	GCTGATGCTGGACATACACCTATATTATTGGAAGCTAGAGATGTTTTAGGAGGCAAGGTC----------TTCATAATATATTTTTATATTTGATCATAAATTAGTTTATAT	102	57	del	N/A
634	GCTGATGCTGGACATACACCTATATTATTGGAAGCTAGAGATGTTCTGGGAGGAAAGGTCTATATGTTAATTCATAATATATTTTTATATTCGATCATAAATTAGTTTATAT	GCTGATGCTGGACATACACCTATATTATTGGAAGCTAGAGATGATCTGGGAGGAAAGGTCTATATGTTAATTCATAATATATTTTTATATTCGATCATAAATTAGTTTATAT	112	57	Sub	N/A
635	GCTGATGCTGGACATACACCTATATTATTGGAAGCTAGAGATGTTCTGGGAGGAAAGGTCTATATGTTAATTCATAATATATTTTTATATTCGATCATAAATTAGTTTATAT	GCTGATGCTGGACATACACCTATATTATTGGAAGCTAGAGATGTTTTAGGAGGAAAGGTC----------TTCATAATATATTTTTTTATTTGATCATAAATTAGTTTATAT	102	57	del	N/A
636	GCTGATGCTGGACATACACCTATATTATTGGAAGCTAGAGATGTTCTGGGAGGAAAGGTCTATATGTTAATTCATAATATATTTTTATATTCGATCATAAATTAGTTTATAT	GCTGATGCTGGACATACACCTGTATTATTGGAAGCTAGAGATGTTTTAGGAGGAAATGTC----------TTCATAATACATTTTTATATTTGATCATAAATTAGTTTATAT	102	57	del	N/A
637	GCTGATGCTGGACATACACCTATATTATTGGAAGCTAGAGATGTTCTGGGAGGAAAGGTCTATATGTTAATTCATAATATATTTTTATATTCGATCATAAATTAGTTTATAT	GCTGATGCTGGACATACACCTATATTATTGGAAGCTAGAGATGTTTTAGGAGTAAATGTC----------TTCATAATACATTTTTATATTTGATCATAAATTAGTTTATAT	102	56	del	N/A
638	GCTGATGCTGGACATACACCTATATTATTGGAAGCTAGAGATGTTCTGGGAGGAAAGGTCTATATGTTAATTCATAATATATTTTTATATTCGATCATAAATTAGTTTATAT	GCTGATGCTGGACATACACCTATATTATTGGAAGCTAGAGATGTTTTAGGAGGAAAGGTC----------TTCATAATATATTTTTATATTTGATCATAAATCAGTTTATAT	102	56	del	N/A
639	GCTGATGCTGGACATACACCTATATTATTGGAAGCTAGAGATGTTCTGGGAGGAAAGGTCTATA---TGTTAATTCATAATATATTTTT--------ATATTCGATCATAAATTAGTTTATAT	GGTGATGCTGGACATACACCTATATTATTGGAAGCTAGAGATGTTCTGGGGGGAAAGGTCTATATACTGTT-ATTCATAATA---TTTTCGAACACAATATTTGATCATAAATTAGTTTATAT	119	56	Ins	N/A
640	GCTGATGCTGGACATACACCTATATTATTGGAAGCTAGAGATGTTCTGGGAGGAAAGGTCTATATGTTAATTCATAATATATTTTTATATTCGATCATAAATTAGTTTATAT	GCTGATGCTGGACATACACCTATATTATTGGAAGCTAGAGACGTTTTAGGAGGAAAGGTC----------TTCATAATATATTTTTATATTTGATCATAAATTAGTTTATAT	102	55	del	N/A
641	GCTGATGCTGGACATACACCTATATTATTGGAAGCTAGAGATGTTCTGGGAGGAAAGGTCTATATGTTAATTCATAATATATTTTTATATTCGATCATAAATTAGTTTATAT	GCTGGTGCTGGACATACACCTATATTATTGGAAGCTAGAGATGTTCTGGGAGGAAAGGTCTATATGTTAATTCATAATATATTTTTATATTCGATCATAAATTAGTTTATAT	112	55	Sub	N/A
642	GCTGATGCTGGACATACACCTATATTATTGGAAGCTAGAGATGTTCTGGGAGGAAAGGTCTATATGTTAATTCATAATATATTTTTATATTCGATCATAAATTAGTTTATAT	GCTGATGCTGGACATACACCTATATTATTGGAAGCTAGAGATGTTTTAGGAGGAAAGGTC----------TTCATAATATATTTTTATATTTGATCATAAACTAGTTTATAT	102	55	del	N/A
643	GCTGATGCTGGACATACACCTATATTATTGGAAGCTAGAGATGTTCTGGGAGGAAAGGTCTATATGTTAATTCATAATATATTTTTATATTCGATCATAAATTAGTTTATAT	GCTGATGCTGGACATACACCTATATTATTGGAAGCTAGAGATGTTTTAGGAGGAAATGTC----------TTCATAATACATCTTTATATTTGATCATAAATTAGTTTATAT	102	55	del	N/A
644	GCTGATGCTGGACATACACCTATATTATTGGAAGCTAGAGATGTTCTGGGAGGAAAGGTCTATATGTTAATTCATAATATATTTTTATATTCGATCATAAATTAGTTTATAT	GCTGATGCTGGACGTACACCTATATTATTGGAAGCTAGAGATGTTTTAGGAGGAAATGTC----------TTCATAATACATTTTTATATTTGATCATAAATTAGTTTATAT	102	55	del	N/A
645	GCTGATGCTGGACATACACCTATATTATTGGAAGCTAGAGATGTTCTGGGAGGAAAGGTCTATATGTTAATTCATAATATATTTTTATATTCGATCATAAATTAGTTTATAT	GCTGATGCTGGACATACACCTATATTATTGGAAGCTAGAGATGTTTTAGGAGGAAATGTC----------TTCATAATACATTTTTATATTTGATCATAAATTAGTTTATGT	102	55	del	N/A
646	GCTGATGCTGGACATACACCTATATTATTGGAAGCTAGAGATGTTCTGGGAGGAAAGGTCTATATGTTAATTCATAATATATTTTTATATTCGATCATAAATTAGTTTATAT	GCTGATGCTGGACATACACCTATATTATTGGAAGCTAGAGATTTTTTAGGAGGAAATGTC----------TTCATAATACATTTTTATATTTGATCATAAATTAGTTTATAT	102	55	del	N/A
647	GCTGATGCTGGACATACACCTATATTATTGGAAGCTAGAGATGTTCTGGGAGGAAAGGTCTATATGTTAATTCATAATATATTTTTATATTCGATCATAAATTAGTTTATAT	GCTGATGCTGGCCATACACCTATATTATTGGAAGCTAGAGATGTTTTAGGAGGAAATGTC----------TTCATAATATATTTTTATATTTGATCATAAATTAGTTTATAT	102	55	del	N/A
648	GCTGATGCTGGACATACACCTATATTATTGGAAGCTAGAGATGTTCTGGGAGGAAAGGTCTATATGTTAATTCATAATATATTTTTATATTCGATCATAAATTAGTTTATAT	GCTGATGCTGGACATACACCTATATTATTGGAAGCTAGAGATGTTTTAGGATGAAAGGTC----------TTCATAATATATTTTTATATTTGATCATAAATTAGTTTATAT	102	55	del	N/A
649	GCTGATGCTGGACATACACCTATATTATTGGAAGCTAGAGATGTTCTGGGAGGAAAGGTCTATATGTTAATTCATAATATATTTTTATATTCGATCATAAATTAGTTTATAT	GCTGATGCTGGACATACACCTATATTATNGGAAGCTAGAGATGTTCTGGGAGGAAAGGTCTATATGTTAATTCATAATATATTTTTATATTCGATCATAAATTAGTTTATAT	112	55	Sub	N/A
650	GCTGATGCTGGACATACACCTATATTATTGGAAGCTAGAGATGTTCTGGGAGGAAAGGTCTATATGTTAATTCATAATATATTTTTATATTCGATCATAAATTAGTTTATAT	GCTGATGCTGGACATACACCTATATTATTGGAAGCTAGAGATGTTTTAGGAGGAAATGTC----------TTCATAATACATTTTTATATTTGATCACAAATTAGTTTATAT	102	54	del	N/A
651	GCTGATGCTGGACATACACCTATATTATTGGAAGCTAGAGATGTTCTGGGAGGAAAGGTCTATATGTTAATTCATAATATATTTTTATATTCGATCATAAATTAGTTTATAT	GCTGATGCTGGACATACACCTATATTATTAGAAGCTAAAGATGTTCTGGGAGGAAAGGTCTATATGTTAATTCATAATATATTTTTATATTCGATCATAAATTAGTTTATAT	112	54	Sub	N/A
652	GCTGATGCTGGACATACACCTATATTATTGGAAGCTAGAGATGTTCTGGGAGGAAAGGTCTATATGTTAATTCATAATATATTTTTATATTCGATCATAAATTAGTTTATAT	GCTGATGCTGGACATACACCTATATTATTGGTAGCTAGAGATGTTTTAGGAGGAAATGTC----------TTCATAATACATTTTTATATTTGATCATAAATTAGTTTATAT	102	54	del	N/A
653	GCTGATGCTGGACATACACCTATATTATTGGAAGCTAGAGATGTTCTGGGAGGAAAGGTCTATA---TGTTAATTCATAATATATTTTT--------ATATTCGATCATAAATTAGTTTATAT	GCTGATGCTGGACATACACCTATATTATTGGCAGCTAGAGATGTTCTGGGGGGAAAGGTCTATATACTGTT-ATTCATAATA---TTTTCGAACACAATATTTGATCATAAATTAGTTTATAT	119	54	Ins	N/A
654	GCTGATGCTGGACATACACCTATATTATTGGAAGCTAGAGATGTTCTGGGAGGAAAGGTCTATATGTTAATTCATAATATATTTTTATATTCGATCATAAATTAGTTTATAT	GCTGATGCTGGACATACACCTATATTATTGGAAGCTAGTGATGTTTTAGGAGGAAATGTC----------TTCATAATACATTTTTATATTTGATCATAAATTAGTTTATAT	102	54	del	N/A
655	GCTGATGCTGGACATACACCTATATTATTGGAAGCTAGAGATGTTCTGGGAGGAAAGGTCTATATGTTAATTCATAATATATTTTTATATTCGATCATAAATTAGTTTATAT	GCTGATGCTGGACATACACCTATATTATTGGAAGCTAGAGATGTTTTAGGAGGAAAGGTC----------TTCATAATGTATTTTTATATTTGATCATAAATTAGTTTATAT	102	54	del	N/A
656	#NAME?	GCTGATGCTGGACATACACCGCTGATGCTGGACATACACCGCTGATGCTGGACATACACCGCTGATGCTGGACATACACCTATATTATTGGAAGCTAGAGATGTTTTAGGAGGAAAGGTC----------TTCATAATATATTTTTATATTTGATCATAAATTAGTTTATAT	162	53	Ins	N/A
657	GCTGATGCTGGACATACACCTATATTATTGGAAGCTAGAGATGTTCTGGGAGGAAAGGTCTATATGTTAATTCATAATATATTTTTATATTCGATCATAAATTAGTTTATAT	GCTGATGCTGGACATACACCTATATTATTGGAAGCTAGAGATGTTTTATGAGGAAAGGTC----------TTCATAATATATTTTTATATTTGATCATAAATTAGTTTATAT	102	53	del	N/A
658	GCTGATGCTGGACATACACCTATATTATTGGAAGCTAGAGATGTTCTGGGAGGAAAGGTCTATATGTTAATTCATAATATATTTTTATATTCGATCATAAATTAGTTTATAT	GCTGATGATGGACATACACCTATATTATTGGAAGCTAGAGATGTTTTAGGAGGAAAGGTC----------TTCATAATATATTTTTATATTTGATCATAAATTAGTTTATAT	102	53	del	N/A
659	GCTGATGCTGGACATACACCTATATTATTGGAAGCTAGAGATGTTCTGGGAGGAAAGGTCTATATGTTAATTCATAATATATTTTTATATTCGATCATAAATTAGTTTATAT	GCTGGTGCTGGACATACACCTATATTATTGGAAGCTAGAGATGTTTTAGGAGGAAAGGTC----------TTCATAATATATTTTTATATTTGATCATAAATTAGTTTATAT	102	53	del	N/A
660	GCTGATGCTGGACATACACCTATATTATTGGAAGCTAGAGATGTTCTGGGAGGAAAGGTCTATATGTTAATTCATAATATATTTTTATATTCGATCATAAATTAGTTTATAT	GCTGATGCTGGAAATACACCTATATTATTGGAAGCTAGAGATGTTTTAGGAGGAAAGGTC----------TTCATAATATATTTTTATATTTGATCATAAATTAGTTTATAT	102	53	del	N/A
661	GCTGATGCTGGACATACACCTATATTATTGGAAGCTAGAGATGTTCTGGGAGGAAAGGTCTATATGTTAATTCATAATATATTTTTATATTCGATCATAAATTAGTTTATAT	GCTGATGCTGGACATAGACCTATATTATTGGAAGCTAGAGATGTTCTGGGAGGAAAGGTCTATATGTTAATTCATAATATATTTTTATATTCGATCATAAATTAGTTTATAT	112	53	Sub	N/A
662	GCTGATGCTGGACATACACCTATATTATTGGAAGCTAGAGATGTTCTGGGAGGAAAGGTCTATATGTTAATTCATAATATATTTTTATATTCGATCATAAATTAGTTTATAT	GCTGATGCTGGACATACACCTATATTATTGGAAGCTAAAGATGTTCTAGGAGGAAAGGTCTATATGTTAGTTCATAATATAGTTTTATATTCGATCATAAATTAGTTTATAT	112	52	Sub	N/A
663	GCTGATGCTGGACATACACCTATATTATTGGAAGCTAGAGATGTTCTGGGAGGAAAGGTCTATA---TGTTAATTCATAATATATTTTT--------ATATTCGATCATAAATTAGTTTATAT	GCTGATGCTGGACATACACCTATATTATTGGAAGCTAGCGATGTTCTGGGGGGAAAGGTCTATATACTGTT-ATTCATAATA---TTTTCGAACACAATATTTGATCATAAATTAGTTTATAT	119	52	Ins	N/A
664	GCTGATGCTGGACATACACCTATATTATTGGAAGCTAGAGATGTTCTGGGAGGAAAGGTCTATATGTTAATTCATAATATATTTTTATATTCGATCATAAATTAGTTTATAT	GCTGATGCTCGACATACACCTATATTATTGGAAGCTAGAGATGTTCTGGGAGGAAAGGTCTATATGTTAATTCATAATATATTTTTATATTCGATCATAAATTAGTTTATAT	112	52	Sub	N/A
665	GCTGATGCTGGACATACACCTATATTATTGGAAGCTAGAGATGTTCTGGGAGGAAAGGTCTATATGTTAATTCATAATATATTTTTATATTCGATCATAAATTAGTTTATAT	GCTGATGCTGGACATACACCTATATTATTGGAAGCTAGAGATGTTTTAGGAGGAAAGGTC----------TTCATAATATATTTTTATATTTGATCATAAATTATTTTATAT	102	52	del	N/A
666	GCTGATGCTGGACATACACCTATATTATTGGAAGCTAGAGATGTTCTGGGAGGAAAGGTCTATATGTTAATTCATAATATATTTTTATATTCGATCATAAATTAGTTTATAT	GCTGATGCTGGACATACACCTATATTATTGGAAGCTAGAGATGTTTTAGGAGGAAATGTC----------TTCATAATACATTTTTATATTTGATCATAAATTAGCTTATAT	102	52	del	N/A
667	GCTGATGCTGGACATACACCTATATTATTGGAAGCTAGAGATGTTCTGGGAGGAAAGGTCTATA---TGTTAATTCATAATATATTTTT--------ATATTCGATCATAAATTAGTTTATAT	GCTGATGCTGGACATACACCTATATTATTGGAAGCGAGAGATGTTCTGGGGGGAAAGGTCTATATACTGTT-ATTCATAATA---TTTTCGAACACAATATTTGATCATAAATTAGTTTATAT	119	52	Ins	N/A
668	GCTGATGCTGGACATACACCTATATTATTGGAAGCTAGAGATGTTCTGGGAGGAAAGGTCTATA---TGTTAATTCATAATATATTTTT--------ATATTCGATCATAAATTAGTTTATAT	GCTGATGCTGGACATACACCTATATTATTGGAAGCTAGAGATGTTCTGGGAGGAAAGGTCTATACACTGTT-ATTCATAATA---TTTTCGAACACAATATTTGATCATAAGTTAGTTTATAT	119	51	Ins	N/A
669	GCTGATGCTGGACATACACCTATATTATTGGAAGCTAGAGATGTTCTGGGAGGAAAGGTCTATATGTTAATTCATAATATATTTTTATATTCGATCATAAATTAGTTTATAT	GCTGATGCTGGACATACACCTATACTATTGGAAGCTAGAGATGTTTTAGGAGGAAAGGTC----------TTCATAATATGTTTTTATATTCGATCATAAATTAGTTTATAT	102	51	del	N/A
670	GCTGATGCTGGACATACACCTATATTATTGGAAGCTAGAGATGTTCTGGGAGGAAAGGTCTATATGTTAATTCATAATATATTTTTATATTCGATCATAAATTAGTTTATAT	GCTGATGCTGGACATACACCTATATTATTGGAAGCTAGAGATGTTTTAGGAGGAAATGTC----------TTCATAATACATTTTTATATTTGATCATAAATCAGTTTATAT	102	51	del	N/A
671	GCTGATGCTGGACATACACCTATATTATTGGAAGCTAGAGATGTTCTGGGAGGAAAGGTCTATATGTTAATTCATAATATATTTTTATATTCGATCATAAATTAGTTTATAT	GCTGATGCTGGACATACACCTATATTATTGGACGCTAGAGATGTTTTAGGAGGAAATGTC----------TTCATAATATATTTTTATATTTGATCATAAATTAGTTTATAT	102	51	del	N/A
672	GCTGATGCTGGACATACACCTATATTATTGGAAGCTAGAGATGTTCTGGGAGGAAAGGTCTATA---TGTTAATTCATAATATATTTTT--------ATATTCGATCATAAATTAGTTTATAT	GCTGATGCTGGACATACACCTATATTATTGGAAGCTAGAGATGGTCTGGGGGGAAAGGTCTATATACTGTT-ATTCATAATA---TTTTCGAACACAATATTTGATCATAAATTAGTTTATAT	119	51	Ins	N/A
673	GCTGATGCTGGACATACACCTATATTATTGGAAGCTAGAGATGTTCTGGGAGGAAAGGTCTATATGTTAATTCATAATATATTTTTATATTCGATCATAAATTAGTTTATAT	GCTGATGCTGGACATACACCTATATTATTGGAAGCTAGAGATGTTTTAGGAGGAAAGGTC----------TTCATATTATATTTTTATATTTGATCATAAATTAGTTTATAT	102	51	del	N/A
674	GCTGATGCTGGACATACACCTATATTATTGGAAGCTAGAGATGTTCTGGGAGGAAAGGTCTATATGTTAATTCATAATATATTTTTATATTCGATCATAAATTAGTTTATAT	GCTGATGCTGGACATACACCTATATTATTGGAAGCTAGAGATGTTCTGGGAGTAAAGGTCTATATGTTAATTCATAATATATTTTTATATTCGATCATAAATTAGTTTATAT	112	51	Sub	N/A
675	GCTGATGCTGGACATACACCTATATTATTGGAAGCTAGAGATGTTCTGGGAGGAAAGGTCTATATGTTAATTCATAATATATTTTTATATTCGATCATAAATTAGTTTATAT	GCTGATGCTGGACATACACCTATATTATTGGAAGCTAGAGATGTTTTAGGAGGAAATGTC----------TTCATAATACATTTTTATATTTGATCATAAATTATTTTATAT	102	51	del	N/A
676	GCTGATGCTGGACATACACCTATATTATTGGAAGCTAGAGATGTTCTGGGAGGAAAGGTCTATATGTTAATTCATAATATATTTTTATATTCGATCATAAATTAGTTTATAT	GCTGATGCTCGACATACACCTATATTATTGGAAGCTAGAGATGTTTTAGGAGGAAAGGTC----------TTCATAATATATTTTTATATTTGATCATAAATTAGTTTATAT	102	51	del	N/A
677	GCTGATGCTGGACATACACCTATATTATTGGAAGCTAGAGATGTTCTGGGAGGAAAGGTCTATATGTTAATTCATAATATATTTTTATATTCGATCATAAATTAGTTTATAT	GCTGATGCTGGACATACACCTATATTATTGGAAGCTATAGATGTTTTAGGAGGAAATGTC----------TTCATAATACATTTTTATATTTGATCATAAATTAGTTTATAT	102	51	del	N/A
678	GCTGATGCTGGACATACACCTATATTATTGGAAGCTAGAGATGTTCTGGGAGGAAAGGTCTATATGTTAATTCATAATATATTTTTATATTCGATCATAAATTAGTTTATAT	GCTGATGCTGGACATACACCTATATTATTGGAAGCTAGAGATGTTTTAGGAGGAAAGGTC----------TTCATAATATATTTTTATATTTGATCATACATTAGTTTATAT	102	50	del	N/A
679	GCTGATGCTGGACATACACCTATATTATTGGAAGCTAGAGATGTTCTGGGAGGAAAGGTCTATATGTTAATTCATAATATATTTTTATATTCGATCATAAATTAGTTTATAT	GCTGATGCTGGACATACACCTATATTATTGGAAGCTAGAGATGTTTTAGGAGGAAATGTC----------TTCATAATACATTTTTATATTTGATCATAAGTTAGTTTATAT	102	50	del	N/A
680	GCTGATGCTGGACATACACCTATATTATTGGAAGCTAGAGATGTTCTGGGAGGAAAGGTCTATATGTTAATTCATAATATATTTTTATATTCGATCATAAATTAGTTTATAT	GCTGATGCTGGACATACACCTATATTATTGGAAGCTAGAGATGTTTTAGGAGGAAAGGTC----------TTCATAATACATTTTTATATTCGATCATAAATTAGTTTATAT	102	50	del	N/A
681	GCTGATGCTGGACATACACCTATATTATTGGAAGCTAGAGATGTTCTGGGAGGAAAGGTCTATATGTTAATTCATAATATATTTTTATATTCGATCATAAATTAGTTTATAT	GCTGATGCTGGACATACACCTATATTATTGGAAGCTAGAGATGTTTTAGCAGGAAAGGTC----------TTCATAATATATTTTTATATTTGATCATAAATTAGTTTATAT	102	50	del	N/A
682	GCTGATGCTGGACATACACCTATATTATTGGAAGCTAGAGATGTTCTGGGAGGAAAGGTCTATATGTTAATTCATAATATATTTTTATATTCGATCATAAATTAGTTTATAT	GCTGATGCTGGACATACACCTATATTATTGGAAGCTAGAGATGTTCTGGGAGGAAAGGTCTATATGTTAATTCATAATATATTTTTATATTCGATCATAACTTAGTTTATAT	112	50	Sub	N/A
683	GCTGATGCTGGACATACACCTATATTATTGGAAGCTAGAGATGTTCTGGGAGGAAAGGTCTATATGTTAATTCATAATATATTTTTATA-TTCGATCATAAATTAGTTTATAT	GCTAATGCTGGACATACACCTATATTATTGGAAGCTAGAGATGTTTTAGGAGGAAAGGTC----------TTCATAATATATTTTTATATTTTGATCATAAATTAGTTTATAT	103	50	del	N/A
684	GCTGATGCTGGACATACACCTATATTATTGGAAGCTAGAGATGTTCTGGGAGGAAAGGTCTATATGTTAATTCATAATATATTTTTATATTCGATCATAAATTAGTTTATAT	GCTGATGGTGGACATACACCTATATTATTGGAAGCTAGAGATGTTTTAGGAGGAAATGTC----------TTCATAATACATTTTTATATTTGATCATAAATTAGTTTATAT	102	50	del	N/A
685	GCTGATGCTGGACATACACCTATATTATTGGAAGCTAGAGATGTTCTGGGAGGAAAGGTCTATA---TGTTAATTCATAATATATTTTT--------ATATTCGATCATAAATTAGTTTATAT	GCTGATGCTGGACATACACCTATATTATTGGAAGCTAGAGATGTACTGGGGGGAAAGGTCTATATACTGTT-ATTCATAATA---TTTTCGAACACAATATTTGATCATAAATTAGTTTATAT	119	50	Ins	N/A
686	GCTGATGCTGGACATACACCTATATTATTGGAAGCTAGAGATGTTCTGGGAGGAAAGGTCTATATGTTAATTCATAATATATTTTTATATTCGATCATAAATTAGTTTATAT	GCTGATGGTGGACATACACCTATATTATTGGAAGCTAGAGATGTTTTAGGAGGAAAGGTC----------TTCATAATATATTTTTATATTTGATCATAAATTAGTTTATAT	102	49	del	N/A
687	GCTGATGCTGGACATACACCTATATTATTGGAAGCTAGAGATGTTCTGGGAGGAAAGGTCTATATGTTAATTCATAATATATTTTTATATTCGATCATAAATTAGTTTATAT	GCTGATGCTGGACATACACCTATATTATTGGAAGCTAGAGATGTTTTAGGAGGAAAGGTC----------TTCATAATATATTTTTATATTTGATCATAAATTAGTGTATAT	102	49	del	N/A
688	GCTGATGCTGGACATACACCTATATTATTGGAAGCTAGAGATGTTCTGGGAGGAAAGGTCTATA---TGTTAATTCATAATATATTTTT--------ATATTCGATCATAAATTAGTTTATAT	GCTCATGCTGGACATACACCTATATTATTGGAAGCTAGAGATGTTCTGGGGGGAAAGGTCTATATACTGTT-ATTCATAATA---TTTTCGAACACAATATTTGATCATAAATTAGTTTATAT	119	49	Ins	N/A
689	GCTGATGCTGGACATACACCTATATTATTGGAAGCTAGAGATGTTCTGGGAGGAAAGGTCTATATGTTAATTCATAATATATTTTTATATTCGATCATAAATTAGTTTATAT	GCTGATGCTGGACATACACCTATATTATTGGAAGCTAGAGATGTTTTAGGAGGAAATGTC----------TTCATAATACATTTTTATATTTCATCATAAATTAGTTTATAT	102	49	del	N/A
690	GCTGATGCTGGACATACACCTATATTATTGGAAGCTAGAGATGTTCTGGGAGGAAAGGTCTATATGTTAATTCATAATATATTTTTATATTCGATCATAAATTAGTTTATAT	GCTGATGCTGGACATACACCTATATTATTGGAAGCTAGCGATGTTTTAGGAGGAAAGGTC----------TTCATAATATATTTTTATATTTGATCATAAATTAGTTTATAT	102	49	del	N/A
691	GCTGATGCTGGACATACACCTATATTATTGGAAGCTAGAGATGTTCTGGGAGGAAAGGTCTATATGTTAATTCATAATATATTTTTATATTCGATCATAAATTAGTTTATAT	GCTGATGCTGGACATACACCTATATTATTGGAAGCTAGAGATGTTTTAGGAGGAAAGGTC----------TTCATAATATATTTTTATATTTGATCATAAATTAGTTTGTAT	102	49	del	N/A
692	GCTGATGCTGGACATACACCTATATTATTGGAAGCTAGAGATGTTCTGGGAGGAAAGGTCTATATGTTAATTCATAATATATTTTTATATTCGATCATAAATTAGTTTATAT	GCTGATGCTGGACATACACCTATATTATTGGAAGCTAGAGATGTTTTAGGAGGAAAGGTC----------TTCATAATATATTTTTATATTTGATCATTAATTAGTTTATAT	102	49	del	N/A
693	GCTGATGCTGGACATACACCTATATTATTGGAAGCTAGAGATGTTCTGGGAGGAAAGGTCTATATGTTAATTCATAATATATTTTTATATTCGATCATAAATTAGTTTATAT	GCTGATGCTGGACATACACCTATATTATTGGAAGCTAGAGATGTTCTGGGAGGAAAGGTCTATATGTTAATTCATAATATATTTTTATATTAGATCATAAATTAGTTTATAT	112	49	Sub	N/A
694	GCTGATGCTGGACATACACCTATATTATTGGAAGCTAGAGATGTTCTGGGAGGAAAGGTCTATATGTTAATTCATAATATATTTTTATATTCGATCATAAATTAGTTTATAT	GCTGATGCTGGACATGCACCTATATTATTGGAAGCTAGAGATGTTTTAGGAGGAAATGTC----------TTCATAATACATTTTTATATTTGATCATAAATTAGTTTATAT	102	48	del	N/A
695	GCTGATGCTGGACATACACCTATATTATTGGAAGCTAGAGATGTTCTGGGAGGAAAGGTCTATATGTTAATTCATAATATATTTTTATATTCGATCATAAATTAGTTTATAT	GCTGATGCTGGACATACACCTATATTATTGGAAGCTAGAGATGTTTTAGGAGGAAATGTC----------TTCAGAATACATTTTTATATTTGATCATAAATTAGTTTATAT	102	48	del	N/A
696	GCTGATGCTGGACATACACCTATATTATTGGAAGCTAGAGATGTTCTGGGAGGAAAGGTCTATA---TGTTAATTCATAATATATTTTT--------ATATTCGATCATAAATTAGTTTATAT	GCTGATGCTGGACATACACCTATATTATTGGAAGCTAGAGATGTTTTGGGGGGAAAGGTCTATATACTGTT-ATTCATAATA---TTTTCGAACACAATATTTGATCATAAATTAGTTTATAT	119	48	Ins	N/A
697	GCTGATGCTGGACATACACCTATATTATTGGAAGCTAGAGATGTTCTGGGAGGAAAGGTCTATA---TGTTAATTCATAATATATTTTT--------ATATTCGATCATAAATTAGTTTATAT	GCTGATGCTGGACATACACCTATATTATTGGACGCTAGAGATGTTCTGGGGGGAAAGGTCTATATACTGTT-ATTCATAATA---TTTTCGAACACAATATTTGATCATAAATTAGTTTATAT	119	48	Ins	N/A
698	GCTGATGCTGGACATACACCTATATTATTGGAAGCTAGAGATGTTCTGGGAGGAAAGGTCTATATGTTAATTCATAATATATTTTTATATTCGATCATAAATTAGTTTATAT	GCTGGTGCTGGACATACACCTATATTATTGGAAGCTAGAGATGTTTTAGGAGGAAATGTC----------TTCATAATACATTTTTATATTTGATCATAAATTAGTTTATAT	102	48	del	N/A
699	GCTGATGCTGGACATACACCTATATTATTGGAAGCTAGAGATGTTCTGGGAGGAAAGGTCTATATGTTAATTCATAATATATTTTTATATTCGATCATAAATTAGTTTATAT	GCTGATGCTGGACATACACCTATATTATTGGAAGCTAGAGATGTTTTAGGCGGAAAGGTC----------TTCATAATATATTTTTATATTTGATCATAAATTAGTTTATAT	102	48	del	N/A
700	GCTGATGCTGGACATACACCTATATTATTGGAAGCTAGAGATGTTCTGGGAGGAAAGGTCTATATGTTAATTCATAATATATTTTTATATTCGATCATAAATTAGTTTATAT	GCTGATGCTGGACATACACCTATATTATTGGAAGCTAGAGATGTTTTAGGAGGAAATGTC----------TTCATAATACATTTTTATATTTGATCATAAATTAGTTTACAT	102	47	del	N/A
701	GCTGATGCTGGACATACACCTATATTATTGGAAGCTAGAGATGTTCTGGGAGGAAAGGTCTATATGTTAATTCATAATATATTTTTATATTCGATCATAAATTAGTTTATAT	GCTGATGCTGGACATACACCTATATTATTGGAAGCTAGAGATGTTCTGGGAGGCAAGGTCTATATGTTAATTCATAATATATTTTTATATTCGATCATAAATTAGTTTATAT	112	47	Sub	N/A
702	GCTGATGCTGGACATACACCTATATTATTGGAAGCTAGAGATGTTCTG-GGAGGAAAGGTCTATATGTTAATTCATAATATATTTTTATATTCGATCATAAATTAGTTTATAT	GCTGATGCTGGACATACACCTATATTATTGGAAGCTAGAGATGTT-TGAGGAGGAAATGTC----------TTCATAATACATTTTTATATTTGATCATAAATTAGTTTATAT	102	47	del	N/A
703	GCTGATGCTGGACATACACCTATATTATTGGAAGCTAGAGATGTTCTGGGAGGAAAGGTCTATATGTTAATTCATAATATATTTTTATATTCGATCATAAATTAGTTTATAT	GCTGATGCTGGACATACACCTATATTATTGGAAGCTAGAGATGTTTTATGAGGAAATGTC----------TTCATAATACATTTTTATATTTGATCATAAATTAGTTTATAT	102	47	del	N/A
704	GCTGATGCTGGACATACACCTATATTATTGGAAGCTAGAGATGTTCTGGGAGGAAAGGTCTATATGTTAATTCATAATATATTTTTATATTCGATCATAAATTAGTTTATAT	GCTGATGCTGGACATACACCTATATTATTGGAAGCTAGAGATGTTTTAGGATGAAATGTC----------TTCATAATACATTTTTATATTTGATCATAAATTAGTTTATAT	102	47	del	N/A
705	GCTGATGCTGGACATACACCTATATTATTGGAAGCTAGAGATGTTCTGGGAGGAAAGGTCTATATGTTAATTCATAATATATTTTTATATTCGATCATAAATTAGTTTATAT	GCTGATGCTGGACATACACCTATATTATTGGAAGCTAGAGATGTTTTAGGAGGAAATGTC----------TTCATAATACATTTTTATATTTGATGATAAATTAGTTTATAT	102	47	del	N/A
706	GCTGATGCTGGACATACACCTATATTATTGGAAGCTAGAGATGTTCTGGGAGGAAAGGTCTATATGTTAATTCATAATATATTTTTATATTCGATCATAAATTAGTTTATAT	GCTGATGCTGGACATACACCTATATTATTGGAAGCTAGAGATGTTTTAGGAGGAAATGTC----------TTCGTAATACATTTTTATATTTGATCATAAATTAGTTTATAT	102	46	del	N/A
707	GCTGATGCTGGACATACACCTATATTATTGGAAGCTAGAGATGTTCTGGGAGGAAAGGTCTATATGTTAATTCATAATATATTTTTATATTCGATCATAAATTAGTTTATAT	GCTGATGCTGGACATACACCTATATTATTCGAAGCTAGAGATGTTCTGGGAGGAAAGGTCTATATGTTAATTCATAATATATTTTTATATTCGATCATAAATTAGTTTATAT	112	46	Sub	N/A
708	GCTGATGCTGGACATACACCTATATTATTGGAAGCTAGAGATGTTCTGGGAGGAAAGGTCTATATGTTAATTCATAATATATTTTTATATTCGATCATAAATTAGTTTATAT	GCTGATGCTGGACATACACCTATATTATTGGAAGCTAGAGATGTTTTAGGAGGAAAGGTC----------TTCATAATATATTTTTATATTTGATCATAAGTTAGTTTATAT	102	46	del	N/A
709	GCTGATGCTGGACATACACCTATATTATTGGAAGCTAGAGATGTTCTGGGAGGAAAGGTCTATATGTTAATTCATAATATATTTTTATATTCGATCATAAATTAGTTTATAT	GCTGATGCTGGACATACACCTATATTATTGGAAGCTAGAGATGTTCTGGGAGGAAAGGTCTATATGTTAATTCATAATATATTTTTGTATTTGATCATAAATTAGTTTATAT	112	46	Sub	N/A
710	GCTGATGCTGGACATACACCTATATTATTGGAAGCTAGAGATGTTCTGGGAGGAAAGGTCTATATGTTAATTCATAATATATTTTTATATTCGATCATAAATTAGTTTATAT	GCTGATGCTGGACATACACCTATATTATTGGAAGCTAGAGATGTTTTAGAAGGAAATGTC----------TTCATAATACATTTTTATATTTGATCATAAATTAGTTTATAT	102	46	del	N/A
711	GCTGATGCTGGACATACACCTATATTATTGGAAGCTAGAGATGTTCTGGGAGGAAAGGTCTATATGTTAATTCATAATATATTTTTATATTCGATCATAAATTAGTTTATAT	GCTGATGCTGGACATACACCTATATTATTGGAAGCTAGAGATGTTTTAGGAGGAAATGTC----------TTCATAATACATTTTTATATTTGATCATAAATTAGTTTGTAT	102	46	del	N/A
712	GCTGATGCTGGACATACACCTATATTATTGGAAGCTAGAGATGTTCTGGGAGGAAAGGTCTATATGTTAATTCATAATATATTTTTATATTCGATCATAAATTAGTTTATAT	GCTGATGCTGGACATACACCTATATTATTGGAAGCTAGAGATATTTTAGGAGGAAATGTC----------TTCATAATACATTTTTATATTTGATCATAAATTAGTTTATAT	102	46	del	N/A
713	GCTGATGCTGGACATACACCTATATTATTGGAAGCTAGAGATGTTCTGGGAGGAAAGGTCTATATGTTAATTCATAATATATTTTTATATTCGATCATAAATTAGTTTATAT	GCTGATGCTGGACATACACCTATTTTATTGGAAGCTAGAGATGTTTTAGGAGGAAATGTC----------TTCATAATACATTTTTATATTTGATCATAAATTAGTTTATAT	102	46	del	N/A
714	GCTGATGCTGGACATACACCTATATTATTGGAAGCTAGAGATGTTCTGGGAGGAAAGGTCTATATGTTAATTCATAATATATTTTTATATTCGATCATAAATTAGTTTATAT	GGTGATGCTGGACATACACCTATATTATTGGAAGCTAGAGATGTTTTAGGAGGAAATGTC----------TTCATAATATATTTTTATATTTGATCATAAATTAGTTTATAT	102	46	del	N/A
715	GCTGATGCTGGACATACACCTATATTATTGGAAGCTAGAGATGTTCTGGGAGGAAAGGTCTATATGTTAATTCATAATATATTTTTATATTCGATCATAAATTAGTTTATAT	GCTGATGATGGACATACACCTATATTATTGGAAGCTAGAGATGTTTTAGGAGGAAATGTC----------TTCATAATACATTTTTATATTTGATCATAAATTAGTTTATAT	102	45	del	N/A
716	GCTGATGCTGGACATACACCTATATTATTGGAAGCTAGAGATGTTCTGGGAGGAAAGGTCTATATGTTAATTCATAATATATTTTTATATTCGATCATAAATTAGTTTATAT	GCTGATGCTGGACATACACCTATATTATTGGAAGCTAGAGATGTTTTAGTAGGAAATGTC----------TTCATAATACATTTTTATATTTGATCATAAATTAGTTTATAT	102	45	del	N/A
717	GCTGATGCTGGACATACACCTATATTATTGGAAGCTAGAGATGTTCTGGGAGGAAAGGTCTATATGTTAATTCATAATATATTTTTATATTCGATCATAAATTAGTTTATAT	GCTGATGCTGCACATACACCTATATTATTGGAAGCTAGAGATGTTTTAGGAGGAAAGGTC----------TTCATAATATATTTTTATATTTGATCATAAATTAGTTTATAT	102	45	del	N/A
718	GCTGATGCTGGACATACACCTATATTATTGGAAGCTAGAGATGTTCTGGGAGGAAAGGTCTATATGTTAATTCATAATATATTTTTATA-TTCGATCATAAATTAGTTTATAT	GCGGATGCTGGACATACACCTATATTATTGGAAGCTAGAGATGTTTTAGGAGGAAAGGTC----------TTCATAATATATTTTTATATTTTGATCATAAATTAGTTTATAT	103	45	del	N/A
719	GCTGATGCTGGACATACACCTATATTATTGGAAGCTAGAGATGTTCTGGGAGGAAAGGTCTATATGTTAATTCATAATATATTTTTATATTCGATCATAAATTAGTTTATAT	GCTGATGCTGGACATACACCTATATTATTGGAAGCTAGAGATGTTTTAAGAGGAAAGGTC----------TTCATAATATATTTTTATATTCGATCATAAATTAGTTTATAT	102	45	del	N/A
720	GCTGATGCTGGACATACACCTATATTATTGGAAGCTAGAGATGTTCTGGGAGGAAAGGTCTATATGTTAATTCATAATATATTTTTATATTCGATCATAAATTAGTTTATAT	GCTGATGCTGGACATACACCTATATTATTGGAAGCTAGAGATGTTCTGGGAGGAAAGGTCTATATGGTAATTCATAATATATTTTTATATTCGATCATAAATTAGTTTATAT	112	45	Sub	N/A
721	GCTGATGCTGGACATACACCTATATTATTGGAAGCTAGAGATGTTCTGGGAGGAAAGGTCTATA---TGTTAATTCATAATATATTTTT--------ATATTCGATCATAAATTAGTTTATAT	GCTGATTCTGGACATACACCTATATTATTGGAAGCTAGAGATGTTCTGGGGGGAAAGGTCTATATACTGTT-ATTCATAATA---TTTTCGAACACAATATTTGATCATAAATTAGTTTATAT	119	44	Ins	N/A
722	GCTGATGCTGGACATACACCTATATTATTGGAAGCTAGAGATGTTCTGGGAGGAAAGGTCTATATGTTAATTCATAATATATTTTTATATTCGATCATAAATTAGTTTATAT	GCTGATGCTGGACATACACCTATATTATTGGAAGCTAGAGATGTTTTAGGAGGAAATGTC----------TTCATAATACATTTTTATATTTGATCATATATTAGTTTATAT	102	44	del	N/A
723	GCTGATGCTGGACATACACCTATATTATTGGAAGCTAGAGATGTTCTGGGAGGAAAGGTCTATATGTTAATTCATAATATATTTTTATATTCGATCATAAATTAGTTTATAT	GCTGATGCTGGACATACACCTATATTATTGGAAGCTAGACATGTTTTAGGAGGAAAGGTC----------TTCATAATATATTTTTATATTTGATCATAAATTAGTTTATAT	102	44	del	N/A
724	GCTGATGCTGGACATACACCTATATTATTGGAAGCTAGAGATGTTCTGGGAGGAAAGGTCTATATGTTAATTCATAATATATTTTTATATTCGATCATAAATTAGTTTATAT	GCTGATGCTGGACATACACCTATATTATTGGAATCTAGAGATGTTTTAGGAGGAAATGTC----------TTCATAATATATTTTTATATTTGATCATAAATTAGTTTATAT	102	44	del	N/A
725	GCTGATGCTGGACATACACCTATATTATTGGAAGCTAGAGATGTTCTGGGAGGAAAGGTCTATATGTTAATTCATAATATATTTTTATATTCGATCATAAATTAGTTTATAT	GCTGATGCTGGACAGACACCTATATTATTGGAAGCTAGAGATGTTTTAGGAGGAAAGGTC----------TTCATAATATATTTTTATATTTGATCATAAATTAGTTTATAT	102	44	del	N/A
726	GCTGATGCTGGACATACACCTATATTATTGGAAGCTAGAGATGTTCTGGGAGGAAAGGTCTATATGTTAATTCATAATATATTTTTATATTCGATCATAAATTAGTTTATAT	GCTGATGCTGGACATACACCTATATTATTGGCCGCTAGAGATGTTTTAGGAGGAAAGGTC----------TTCATAATATATTTTTATATTTGATCATAAATTAGTTTATAT	102	44	del	N/A
727	GCTGATGCTGGACATACACCTATATTATTGGAAGCTAGAGATGTTCTGGGAGGAAAGGTCTATATGTTAATTCATAATATATTTTTATATTCGATCATAAATTAGTTTATAT	GCTGATGCTGGACATACACCTATATTATTGGAAGCTAGAGATGTTTTAGGAGGAAATGTC----------TTCATAAGACATTTTTATATTTGATCATAAATTAGTTTATAT	102	44	del	N/A
728	GCTGATGCTGGACATACACCTATATTATTGGAAGCTAGAGATGTTCTGGGAGGAAAGGTCTATATGTTAATTCATAATATATTTTTATATTCGATCATAAATTAGTTTATAT	GCTGATGCTGGACATACACCTATATTATTGGAAGCTAGAGATGTTTTAGGAGGAAATGTC----------TTCATAATACCTTTTTATATTTGATCATAAATTAGTTTATAT	102	44	del	N/A
729	GCTGATGCTGGACATACACCTATATTATTGGAAGCTAGAGATGTTCTGGGAGGAAAGGTCTATATGTTAATTCATAATATATTTTTATATTCGATCATAAATTAGTTTATAT	GCTGATGCTGGACATACACCTATATTATTGGAAGCTAGAGATGTTCTGGGAGGAAAGGTCTATATGTTAATTCATAATCTATTTTTATATTCGATCATAAATTAGTTTATAT	112	44	Sub	N/A
730	GCTGATGCTGGACATACACCTATATTATTGGAAGCTAGAGATGTTCTGGGAGGAAAGGTCTATATGTTAATTCATAATATATTTTTATATTCGATCATAAATTAGTTTATAT	GCTGATGCTGGACATACACCTATATTATNGGAAGCTNGAGATGTTCTGGGAGGAAAGGTCTATATGTTAATTCATAATATATTTTTATATTCGATCATAAATTAGTTTATAT	112	44	Sub	N/A
731	GCTGATGCTGGACATACACCTATATTATTGGAAGCTAGAGATGTTCTGGGAGGAAAGGTCTATATGTTAATTCATAATATATTTTTATATTCGATCATAAATTAGTTTATAT	GCTGATGCTGGACATACACCTATATTATTGGAAGCTAGAGATGTTCTGGGAGGAAAGGTCTATATGTTAATTCATAATTTATTTTTATATTCGATCATAAATTAGTTTATAT	112	43	Sub	N/A
732	GCTGATGCTGGACATACACCTATATTATTGGAAGCTAGAGATGTTCTGGGAGGAAAGGTCTATATGTTAATTCATAATATATTTTTATATTCGATCATAAATTAGTTTATAT	GCTGATGCTGGACATACACCTATATTATTGGAAGCTAGAGATGTTCTGGGAGGAAAGGTCTTTATGTTAATTCATAATATATTTTTATATTCGATCATAAATTAGTTTATAT	112	43	Sub	N/A
733	GCTGATGCTGGACATACACCTATATTATTGGAAGCTAGAGATGTTCTGGGAGGAAAGGTCTATATGTTAATTCATAATATATTTTTATATTCGATCATAAATTAGTTTATAT	GCTGATGCTGGACATACACCTATATTATTGGAAGCTAGAGATGTTCTGGGAGGAAAGGTCTATATGTTAATTCATAATATATTTTTATATTCGATCATAAATTAGTTTTTAT	112	43	Sub	N/A
734	GCTGATGCTGGACATACACCTATATTATTGGAAGCTAGAGATGTTCTGGGAGGAAAGGTCTATATGTTAATTCATAATATATTTTTATATTCGATCATAAATTAGTTTATAT	GCTGATGCTGGACATACACCTATATTATTGGAAGCTAGATATGTTTTAGGAGGAAATGTC----------TTCATAATACATTTTTATATTTGATCATAAATTAGTTTATAT	102	43	del	N/A
735	#NAME?	GCTGATGCTGGACATACACCGCTGATGCTGGACATACACCGCTGATGCTGGACATACACCTATATTATTGGAAGCTAGAGATGTTCTGGGGGGAAAGGTCTATATACTGTT-ATTCATAATA---TTTTCGAACACAATATTTGATCATAAATTAGTTTATAT	159	43	Ins	N/A
736	GCTGATGCTGGACATACACCTATATTATTGGAAGCTAGAGATGTTCTGGGAGGAAAGGTCTATATGTTAATTCATAATATATTTTTATATTCGATCATAAATTAGTTTATAT	ACTGATGCTGGACATACACCTATATTATTGGAAGCTAGAGATGTTTTAGGAGGAAAGGTC----------TTCATAATATATTTTTATATTTGATCATAAATTAGTTTATAT	102	43	del	N/A
737	GCTGATGCTGGACATACACCTATATTATTGGAAGCTAGAGATGTTCTGGGAGGAAAGGTCTATATGTTAATTCATAATATATTTTTATATTCGATCATAAATTAGTTTATAT	GCTGATGCTGGACATACACCTATATTATTGGAAGCTAGAGACGTTTTAGGAGGAAATGTC----------TTCATAATACATTTTTATATTTGATCATAAATTAGTTTATAT	102	43	del	N/A
738	GCTGATGCTGGACATACACCTATATTATTGGAAGCTAGAGATGTTCTGGGAGGAAAGGTCTATATGTTAATTCATAATATATTTTTATA-TTCGATCATAAATTAGTTTATAT	GCTGATGCTGGGCATACACCTATATTATTGGAAGCTAGAGATGTTTTAGGAGGAAAGGTC----------TTCATAATATATTTTTATATTTTGATCATAAATTAGTTTATAT	103	43	del	N/A
739	GCTGATGCTGGACATACACCTATATTATTGGAAGCTAGAGATGTTCTGGGAGGAAAGGTCTATATGTTAATTCATAATATATTTTTATATTCGATCATAAATTAGTTTATAT	GCTGATGCTGGACATACACCTATACGATTGGAAGCTAGAGATGTTTTAGGAGGAAAGGTC----------TTCATAATATGTTTTTATATTTGATCATAAATTAGTTTATAT	102	43	del	N/A
740	GCTGATGCTGGACATACACCTATATTATTGGAAGCTAGAGATGTTCTGGGAGGAAAGGTCTATATGTTAATTCATAATATATTTTTATATTCGATCATAAATTAGTTTATAT	GGTGATGCTGGACATACAGCTATATTATTGGAAGCTAGAGATGTTTTAGGAGGAAAGGTC----------TTCATAATATATTTTTATATTTGATCATAAATTAGTTTATAT	102	43	del	N/A
741	GCTGATGCTGGACATACACCTATATTATTGGAAGCTAGAGATGTTCTGGGAGGAAAGGTCTATATGTTAATTCATAATATATTTTTATATTCGATCATAAATTAGTTTATAT	GCTGATGCTGGACATACACCTATATTATTGGAAGCTAGAGATGTTATAGGAGGAAAGGTC----------TTCATAATATATTTTTATATTTGATCATAAATTAGTTTATAT	102	42	del	N/A
742	GCTGATGCTGGACATACACCTATATTATTGGAAGCTAGAGATGTTCTGGGAGGAAAGGTCTATATGTTAATTCATAATATATTTTTATATTCGATCATAAATTAGTTTATAT	GCTGATGCTGGACATACACCTATATTATTGGAAGCTAGAGATGTTTTAGGAGGAAATGTC----------TTCATAATACATTTTTATGTTTGATCATAAATTAGTTTATAT	102	42	del	N/A
743	GCTGATGCTGGACATACACCTATATTATTGGAAGCTAGAGATGTTCTGGGAGGAAAGGTCTATATGTTAATTCATAATATATTTTTATATTCGATCATAAATTAGTTTATAT	GCTGATGCTGGACATACACCTATATTATTGGAAGCTATAGATGTTTTAGGAGGAAAGGTC----------TTCATAATATATTTTTATATTTGATCATAAATTAGTTTATAT	102	42	del	N/A
744	GCTGATGCTGGACATACACCTATATTATTGGAAGCTAGAGATGTTCTGGGAGGAAAGGTCTATATGTTAATTCATAATATATTTTTATATTCGATCATAAATTAGTTTATAT	GCTGATGCTGCACATACACCTATATTATTGGAAGCTAGAGATGTTCTGGGAGGAAAGGTCTATATGTTAATTCATAATATATTTTTATATTCGATCATAAATTAGTTTATAT	112	42	Sub	N/A
745	#NAME?	GCTGATGCTGGACATACACCGCTGATGCTGGACATACACCGCTGATGCTGGACATACACCTATATTATTGGAAGCTAGAGATGTTTTAGGAGGAAATGTC----------TTCATAATATATTTTTATATTTGATCATAAATTAGTTTATAT	142	42	Ins	N/A
746	GCTGATGCTGGACATACACCTATATTATTGGAAGCTAGAGATGTTCTGGGAGGAAAGGTCTATATGTTAATTCATAATATATTTTTATATTCGATCATAAATTAGTTTATAT	GCTGATGCTGGACATACACCTATATTATTGGAAGCTAGAGATGTTCTGGGAGGAAAGGTCTATATGTTAATTCATAATATATTTTTATATTCGATCATAAATTAGTTGATAT	112	42	Sub	N/A
747	GCTGATGCTGGACATACACCTATATTATTGGAAGCTAGAGATGTTCTGGGAGGAAAGGTCTATATGTTAATTCATAATATATTTTTATATTCGATCATAAATTAGTTTATAT	GGTGATGCTGGACATACAGCTATATTATTGGAAGCTAGAGATGTTCTGGGAGGAAAGGTCTATATGTTAATTCATAATATATTTTTATATTCGATCATAAATTAGTTTATAT	112	42	Sub	N/A
748	GCTGATGCTGGACATACACCTATATTATTGGAAGCTAGAGATGTTCTGGGAGGAAAGGTCTATATGTTAATTCATAATATATTTTTATATTCGATCATAAATTAGTTTATAT	GCTGATGCTGGACATACACCGATATTATTGGAAGCTAGAGATGTTTTAGGAGGAAATGTC----------TTCATAATACATTTTTATATTTGATCATAAATTAGTTTATAT	102	41	del	N/A
749	GCTGATGCTGGACATACACCTATATTATTGGAAGCTAGAGATGTTCTGGGAGGAAAGGTCTATATGTTAATTCATAATATATTTTTATATTCGATCATAAATTAGTTTATAT	GCTGATGCTGGACATACACCTATATTATTGGAAGCTAGAGATGTTCTGGGAGGAAAGGTCTATATGTTAATTCAAACTATATTTTTATATTCGATCATAAATTAGTTTATAT	112	41	Sub	N/A
750	GCTGATGCTGGACATACACCTATATTATTGGAAGCTAGAGATGTTCTGGGAGGAAAGGTCTATATGTTAATTCATAATATATTTTTATATTCGATCATAAATTAGTTTATAT	GCTGATACTGGACATACACCTATATTATTGGAAGCTAGAGATGTTTTAGGAGGAAATGTC----------TTCATAATACATTTTTATATTTGATCATAAATTAGTTTATAT	102	41	del	N/A
751	GCTGATGCTGGACATACACCTATATTATTGGAAGCTAGAGATGTTCTGGGAGGAAAGGTCTATATGTTAATTCATAATATATTTTTATATTCGATCATAAATTAGTTTATAT	GCTGATGCTGGACATACACCTATATTATTGGAAGCTAGAGATGTTTTAGGAGGAAAGGTC----------TTCATAATATATTTTTGTATTCGATCATAAATTAGTTTATAT	102	41	del	N/A
752	#NAME?	GCTGATGCTGGACATACACCGCTGATGCTGGACATACACCTATATTATTGGAAGCTAGAGATGTTCTGGGAGGAAAGGTC----------TTCATAATATATTTTTATATTTGATCATAAATTAGTTTATAT	122	41	Ins	N/A
753	GCTGATGCTGGACATACACCTATATTATTGGAAGCTAGAGATGTTCTGGGAGGAAAGGTCTATATGTTAATTCATAATATATTTTTATATTCGATCATAAATTAGTTTATAT	GCTGATGCGGGACATACACCTATATTATTGGAAGCTAGAGATGTTTTAGGAGGAAATGTC----------TTCATAATATATTTTTATATTTGATCATAAATTAGTTTATAT	102	41	del	N/A
754	GCTGATGCTGGACATACACCTATATTATTGGAAGCTAGAGATGTTCTGGGAGGAAAGGTCTATA---TGTTAATTCATAATATATTTTT--------ATATTCGATCATAAATTAGTTTATAT	GCTGATGCTGGCCATACACCTATATTATTGGAAGCTAGAGATGTTCTGGGGGGAAAGGTCTATATACTGTT-ATTCATAATA---TTTTCGAACACAATATTTGATCATAAATTAGTTTATAT	119	41	Ins	N/A
755	GCTGATGCTGGACATACACCTATATTATTGGAAGCTAGAGATGTTCTGGGAGGAAAGGTCTATATGTTAATTCATAATATATTTTTATATTCGATCATAAATTAGTTTATAT	GCTGATGCTGGACAGACACCTATATTATTGGAAGCTAGAGATGTTCTGGGAGGAAAGGTCTATATGTTAATTCATAATATATTTTTATATTCGATCATAAATTAGTTTATAT	112	41	Sub	N/A
756	GCTGATGCTGGACATACACCTATATTATTGGAAGCTAGAGATGTTCTGGGAGGAAAGGTCTATATGTTAATTCATAATATATTTTTATATTCGATCATAAATTAGTTTATAT	GCTGATGCTGGACATAGACCTATATTATTGGAAGCTAGAGATGTTTTAGGAGGAAAGGTC----------TTCATAATATATTTTTATATTTGATCATAAATTAGTTTATAT	102	41	del	N/A
757	GCTGATGCTGGACATACACCTATATTATTGGAAGCTAGAGATGTTCTGGGAGGAAAGGTCTATATGTTAATTCATAATATATTTTTATATTCGATCATAAATTAGTTTATAT	GCTGATGCTGGACATACACCTATATTATTGGAAGCTAGAGAGGTTTTAGGAGGAAAGGTC----------TTCATAATATATTTTTATATTTGATCATAAATTAGTTTATAT	102	41	del	N/A
758	GCTGATGCTGGACATACACCTATATTATTGGAAGCTAGAGATGTTCTGGGAGGAAAGGTCTATATGTTAATTCATAATATATTTTTATATTCGATCATAAATTAGTTTATAT	GCTGATGCTGGACATACACCTATATTATTGGAAGCTAAAGATGTTCTATGAGGAAAGGTCTATATGTTAATTCATAATATATTTTTATATTCGATCATAAATTAGTTTATAT	112	41	Sub	N/A
759	GCTGATGCTGGACATACACCTATATTATTGGAAGCTAGAGATGTTCTGGGAGGAAAGGTCTATATGTTAATTCATAATATATTTTTATATTCGATCATAAATTAGTTTATAT	GCTGATGCTGGACATACACCTATATTATTGGAAGCTAGAGCTGTTTTAGGAGGAAATGTC----------TTCATAATACATTTTTATATTTGATCATAAATTAGTTTATAT	102	41	del	N/A
760	GCTGATGCTGGACATACACCTATATTATTGGAAGCTAGAGATGTTCTGGGAGGAAAGGTCTATATGTTAATTCATAATATATTTTTATATTCGATCATAAATTAGTTTATAT	GCTGATGCTGCACATACACCTATATTATTGGAAGCTAGAGATGTTTTAGGAGGAAATGTC----------TTCATAATACATTTTTATATTTGATCATAAATTAGTTTATAT	102	41	del	N/A
761	#NAME?	GCTGATGCTGGACATACACCGCTGATGCTGGACATACACCTATATTATTGGAAGCTAGAGATGTTTTAGGAGGAAAGGTC----------TTCATAATATATTTTTGTATTTGATCATAAATTAGTTTATAT	122	41	Ins	N/A
762	GCTGATGCTGGACATACACCTATATTATTGGAAGCTAGAGATGTTCTGGGAGGAAAGGTCTATATGTTAATTCATAATATATTTTTATATTCGATCATAAATTAGTTTATAT	GCTGATGCTGGACATACACCTATATTATTGGAAGATAGAGATGTTTTAGGAGGAAATGTC----------TTCATAATATATTTTTATATTTGATCATAAATTAGTTTATAT	102	41	del	N/A
763	GCTGATGCTGGACATACACCTATATTATTGGAAGCTAGAGATGTTCTGGGAGGAAAGGTCTATATGTTAATTCATAATATATTTTTATATTCGATCATAAATTAGTTTATAT	GCTGATGCTGGACATACACCTATATGATTGGAAGCTAGAGACGTTCTGGGAGGAAAGGTCTATATGTTAATTCATAATATATTTTTATATTCGATCATAAATTAGTTTATAT	112	41	Sub	N/A
764	GCTGATGCTGGACATACACCTATATTATTGGAAGCTAGAGATGTTCTGGGAGGAAAGGT--------------------------------------------------------------CTAT-----------------ATGTT--------AA-----TTCATAATATATTTTTATATTCGATCATAAATTAGTTTATAT	GCTGATGCTGGACATACACCTATATTATTGGAAGCTAGAGATGTTCTGGGAGGAAAGGTTGCTGCTTGGAAAGACAAGGATGGGGATTGGTATGAAACAGGAGCTGATGCTGGACATACACCTATATTATTGGAAGCTAGAGATGTTTTAGGAGGAAAGGTCTTCATAATATATTTTTATATTTGATCATAAATTAGTTTATAT	204	40	Ins	N/A
765	GCTGATGCTGGACATACACCTATATTATTGGAAGCTAGAGATGTTCTGGGAGGAAAGGTCTATATGTTAATTCATAATATATTTTTATATTCGATCATAAATTAGTTTATAT	GCTGATGCTGGACATACACCTATATTATAGGAAGCTAGAGATGTTTTAGGAGGAAAGGTC----------TTCATAATATATTTTTATATTTGATCATAAATTAGTTTATAT	102	40	del	N/A
766	GCTGATGCTGGACATACACCTATATTATTGGAAGCTAGAGATGTTCTGGGAGGAAAGGTCTATATGTTAATTCATAATATATTTTTATATTCGATCATAAATTAGTTTATAT	GCTGATGCTGGACATACACCTATATTATTGGAAGCTAGAGATGTTCTGGGAGGAAAGGTCTATATGTTAATTCATAATATATTTTTATATTCGATGATAAATTAGTTTATAT	112	40	Sub	N/A
767	GCTGATGCTGGACATACACCTATATTATTGGAAGCTAGAGATGTTCTGGGAGGAAAGGTCTATATGTTAATTCATAATATATTTTTATATTCGATCATAAATTAGTTTATAT	GCTGATGCTGGACATACACCTATATTATTGGAAGCTAGAGATGTT-TAGGAGGAAATGTC----------TTCATAATACATTTTTATATTTGATCATAAATTAGTTTATAT	101	40	del	N/A
768	GCTGATGCTGGACATACACCTATATTATTGGAAGCTAGAGATGTTCTGGGAGGAAAGGTCTATATGTTAATTCATAATATATTTTTATATTCGATCATAAATTAGTTTATAT	GCTGATGCTGGACATACACCTATATTAGTGGAGGCTAGAGATGTTTTAGGAGGAAATGTC----------TTCATAATACATTTTTATATTTGATCATAAATTAGTTTATAT	102	40	del	N/A
769	GCTGATGCTGGACATACACCTATATTATTGGAAGCTAGAGATGTTCTGGGAGGAAAGGTCTATATGTTAATTCATAATATATTTTTATATTCGATCATAAATTAGTTTATAT	GCTGAAGCTGGACATACACCTATATGATTGGAAGCTAGAGATGTTCTGGGAGGAAAGGTCTATATGTTAATTCATAATATATTTTTATATTCGATCATAAATTAGTTTATAT	112	40	Sub	N/A
770	GCTGATGCTGGACATACACCTATATTATTGGAAGCTAGAGATGTTCTGGGAGGAAAGGTCTATATGTTAATTCATAATATATTTTTATATTCGATCATAAATTAGTTTATAT	GCTGATGCTGGACATACACCTATATTATTGGAAGCTAGAGATGTTCTGGGAGGAAAGTTCTATATGTTAATTCATAATATATTTTTATATTCGATCATAAATTAGTTTATAT	112	39	Sub	N/A
771	GCTGATGCTGGACATACACCTATATTATTGGAAGCTAGAGATGTTCTGGGAGGAAAGGTCTATA---TGTTAATTCATAATATATTTTT--------ATATTCGATCATAAATTAGTTTATAT	GCTGATGCGGGACATACACCTATATTATTGGAAGCTAGAGATGTTCTGGGGGGAAAGGTCTATATACTGTT-ATTCATAATA---TTTTCGAACACAATATTTGATCATAAATTAGTTTATAT	119	39	Ins	N/A
772	GCTGATGCTGGACATACACCTATATTATTGGAAGCTAGAGATGTTCTGGGAGGAAAGGTCTATATGTTAATTCATAATATATTTTTATATTCGATCATAAATTAGTTTATAT	GCTGATGCTGGACATACACCTATATTATTGGAAGCTAGAGATGTTTTAGGAGGAAAGGTC----------TTCATCATATATTTTTATATTTGATCATAAATTAGTTTATAT	102	39	del	N/A
773	GCTGATGCTGGACATACACCTATATTATTGGAAGCTAGAGATGTTCTGGGAGGAAAGGTCTATATGTTAATTCATAATATATTTTTATA-TTCGATCATAAATTAGTTTATAT	GCTGATGCTGGACATACACCTATATTATTGGCAGCTAGAGATGTTTTAGGAGGAAAGGTC----------TTCATAATATATTTTTATATTTTGATCATAAATTAGTTTATAT	103	39	del	N/A
774	GCTGATGCTGGACATACACCTATATTATTGGAAGCTAGAGATGTTCTGGGAGGAAAGGTCTATATGTTAATTCATAATATATTTTTATATTCGATCATAAATTAGTTTATAT	GCTGATGCTGGACATACACCTATATTATTGGAAGCTAGTGATGTTCTGGGAGGAAAGGTCTATATGTTAATTCATAATATATTTTTATATTCGATCATAAATTAGTTTATAT	112	39	Sub	N/A
775	GCTGATGCTGGACATACACCTATATTATTGGAAGCTAGAGATGTTCTGGGAGGAAAGGTCTATATGTTAATTCATAATATATTTTTATATTCGATCATAAATTAGTTTATAT	GCTGATGCTGGACATACACCTATATTCTTGGAAGCTAGCGATGTTCTGGGAGGAAAGGTCTATATGTTAATTCATAATATATTTTTATATTCGATCATAAATTAGTTTATAT	112	39	Sub	N/A
776	GCTGATGCTGGACATACACCTATATTATTGGAAGCTAGAGATGTTCTGGGAGGAAAGGTCTATATGTTAATTCATAATATATTTTTATATTCGATCATAAATTAGTTTATAT	GCTGATGCTGGACATAGACCTATATTATTGGAAGCTAGAGATGTTTTAGGAGGAAATGTC----------TTCATAATACATTTTTATATTTGATCATAAATTAGTTTATAT	102	39	del	N/A
777	GCTGATGCTGGACATACACCTATATTATTGGAAGCTAGAGATGTTCTGGGAGGAAAGGTCTATATGTTAATTCATAATATATTTTTATATTCGATCATAAATTAGTTTATAT	GCTGATGCTGGACATACACCTATATTATTGGAAGCTAGAGATGTTCTGGGAGGAAAGGTCTATATGTTAATTCATAATATATTTTTCTATTCGATCATAAATTAGTTTATAT	112	39	Sub	N/A
778	GCTGATGCTGGACATACACCTATATTATTGGAAGCTAGAGATGTTCTGGGAGGAAAGGTCTATATGTTAATTCATAATATATTTTTATATTCGATCATAAATTAGTTTATAT	GCTGATGCTGGACATACACCTATATTATTGGAAGCTAGAGATGGTTTAGGAGGAAATGTC----------TTCATAATACATTTTTATATTTGATCATAAATTAGTTTATAT	102	39	del	N/A
779	GCTGATGCTGGACATACACCTATATTATTGGAAGCTAGAGATGTTCTGGGAGGAAAGGTCTATATGTTAATTCATAATATATTTTTATATTCGATCATAAATTAGTTTATAT	GCTTATGCTGGACATACACCTATACTATTGGAAGCTAGAGATGTTTTAGGAGGAAAGGTC----------TTCATAATATGTTTTTATATTTGATCATAAATTAGTTTATAT	102	39	del	N/A
780	GCTGATGCTGGACATACACCTATATTATTGGAAGCTAGAGATGTTCTGGGAGGAAAGGTCTATATGTTAATTCATAATATATTTTTATATTCGATCATAAATTAGTTTATAT	GCTGATGCTGGACATACACCTATATTAGTGGAGGCTAGAGATGTTCTGGGAGGAAAGGTCTATATGTTAATTCATAATATATTTTTATATTCGATCATAAATTAGTTTATAT	112	39	Sub	N/A
781	GCTGATGCTGGACATACACCTATATTATTGGAAGCTAGAGATGTTCTGGGAGGAAAGGTCTATATGTTAATTCATAATATATTTTTATATTCGATCATAAATTAGTTTATAT	GCTCATGCTGGACATACACCTATATTATTGGAAGCTAGAGATGTTTTAGGAGGAAATGTC----------TTCATAATATATTTTTATATTTGATCATAAATTAGTTTATAT	102	39	del	N/A
782	GCTGATGCTGGACATACACCTATATTATTGGAAGCTAGAGATGTTCTGGGAGGAAAGGTCTATATGTTAATTCATAATATATTTTTATATTCGATCATAAATTAGTTTATAT	GCTGATGCTGGACATACACCTATATTAGTGGACGCTAGAGATGTTTTAGGAGGAAATGTC----------TTCATAATACATTTTTATATTTGATCATAAATTAGTTTATAT	102	39	del	N/A
783	GCTGATGCTGGACATACACCTATATTATTGGAAGCTAGAGATGTTCTGGGAGGAAAGGTCTATA---TGTTAATTCATAATATATTTTT--------ATATTCGATCATAAATTAGTTTATAT	GCTGATGCTGTACATACACCTATATTATTGGAAGCTAGAGATGTTCTGGGGGGAAAGGTCTATATACTGTT-ATTCATAATA---TTTTCGAACACAATATTTGATCATAAATTAGTTTATAT	119	38	Ins	N/A
784	GCTGATGCTGGACATACACCTATATTATTGGAAGCTAGAGATGTTCTGGGAGGAAAGGTCTATATGTTAATTCATAATATATTTTTATATTCGATCATAAATTAGTTTATAT	GCTGATGCTGGACATACACCTATATTATTGGAAGCTAGAGATGTTCTGGGAGGAACGGTCTATATGTTAATTCATAATATATTTTTATATTCGATCATAAATTAGTTTATAT	112	38	Sub	N/A
785	GCTGATGCTGGACATACACCTATATTATTGGAAGCTAGAGATGTTCTGGGAGGAAAGGTCTATATGTTAATTCATAATATATTTTTATATTCGATCATAAATTAGTTTATAT	GCTGATGCTGGACATACACCTATATTATTGGAAGCTAGAGATGTTCTGGGGGGAAAGGTC----------TTCATAATACATTTTTATATTTGATCATAAATTAGTTTATAT	102	38	del	N/A
786	#NAME?	GCTGATGCTGGACATACACCGCTGATGCTGGACATACACCTATATTATTGGAAGCTAGAGATGTTTTAGGAGGAAAGGTC----------TTCATAATACATTTTTATATTTGATCATAAATTAGTTTATAT	122	38	Ins	N/A
787	GCTGATGCTGGACATACACCTATATTATTGGAAGCTAGAGATGTTCTGGGAGGAAAGGTCTATATGTTAATTCATAATATATTTTTATATTCGATCATAAATTAGTTTATAT	GCTGATGCTGGACATACACCTATATTATTGGAAGCTAGAGATGTTTTAGGAGTAAAGGTC----------TTCATAATATATTTTTATATTTGATCATAAATTAGTTTATAT	102	38	del	N/A
788	GCTGATGCTGGACATACACCTATATTATTGGAAGCTAGAGATGTTCTGGGAGGAAAGGTCTATA---TGTTAATTCATAATATATTTTT--------ATATTCGATCATAAATTAGTTTATAT	GCTGATGCTGGACATACACCTATATTATTGGAAGCTAGAGATGTTCTGGAGGGAAAGGTCTATATACTGTT-ATTCATAATA---TTTTCGAACACAATATTTGATCATAAATTAGTTTATAT	119	38	Ins	N/A
789	GCTGATGCTGGACATACACCTATATTATTGGAAGCTAGAGATGTTCTGGGAGGAAAGGTCTATATGTTAATTCATAATATATTTTTATATTCGATCATAAATTAGTTTATAT	GCTGATGCTGGACATACACCTATATTATTGGACGCTAGCGATGTTCTGGGAGGAAAGGTCTATATGTTAATTCATAATATATTTTTATATTCGATCATAAATTAGTTTATAT	112	38	Sub	N/A
790	GCTGATGCTGGACATACACCTATATTATTGGAAGCTAGAGATGTTCTGGGAGGAAAGGTCTATATGTTAATTCATAATATATTTTTATATTCGATCATAAATTAGTTTATAT	GCTGATGCTGGACATACACCTATATTATTGGAAGCTAGAGATGTTTTAGGAGGAAAGGTC----------TTCATAATATA-TTTTATATTTGATCATAAATTAGTTTATAT	101	38	del	N/A
791	GCTGATGCTGGACATACACCTATATTATTGGAAGCTAGAGATGTTCTGGGAGGAAAGGTCTATATGTTAATTCATAATATATTTTTATATTCGATCATAAATTAGTTTATAT	GCTGATGCTGGACATACACCTATATTATTGGAAGCTAGAGATGTTCTGGGAGGAAAGGTCTATATGTTAATTCATAATATATTTTTATATTCGATCATAAAGTAGTTTATAT	112	38	Sub	N/A
792	GCTGATGCTGGACATACACCTATATTATTGGAAGCTAGAGATGTTCTGGGAGGAAAGGTCTATATGTTAATTCATAATATATTTTTATATTCGATCATAAATTAGTTTATAT	GCTGATGCTGGACATACACCTATCTTATTGGAAGCTAGAGATGTTTTAGGAGGAAATGTC----------TTCATAATATATTTTTATATTTGATCATAAATTAGTTTATAT	102	38	del	N/A
793	GCTGATGCTGGACATACACCTATATTATTGGAAGCTAGAGATGTTCTGGGAGGAAAGGTCTATATGTTAATTCATAATATATTTTTATATTCGATCATAAATTAGTTTATAT	GCTGATGCTGGAAATACACCTATATTATTGGAAGCTAGAGATGTTCTGGGAGGAAAGGTCTATATGTTAATTCATAATATATTTTTATATTCGATCATAAATTAGTTTATAT	112	38	Sub	N/A
794	GCTGATGCTGGACATACACCTATATTATTGGAAGCTAGAGATGTTCTGGGAGGAAAGGTCTATATGTTAATTCATAATATATTTTTATATTCGATCATAAATTAGTTTATAT	GCTGATGCTGGACATACACCTATATTATTGGAAGCTAGAGATGTTCTGGGAGGAAAGGTCTATATGTGAATTCATAATATATTTTTATATTCGATCATAAATTAGTTTATAT	112	38	Sub	N/A
795	GCTGATGCTGGACATACACCTATATTATTGGAAGCTAGAGATGTTCTGGGAGGAAAGGTCTATATGTTAATTCATAATATATTTTTATATTCGATCATAAATTAGTTTATAT	GCTGATGCTGGACATACACCTATATTATTGGAAGNTAGAGATGTTTTAGGAGGAAATGTC----------TTCATAATACATTTTTATATTTGATCATAAATTAGTTTATAT	102	38	del	N/A
796	GCTGATGCTGGACATACACCTATATTATTGGAAGCTAGAGATGTTCTGGGAGGAAAGGTCTATATGTTAATTCATAATATATTTTTATATTCGATCATAAATTAGTTTATAT	GCTGATGCTGGACATACACCTATATTAGTGGAGGCTAGAGATGTTTTAGGAGGAAAGGTC----------TTCATAATATATTTTTATATTTGATCATAAATTAGTTTATAT	102	38	del	N/A
797	GCTGATGCTGGACATACACCTATATTATTGGAAGCTAGAGATGTTCTGGGAGGAAAGGTCTATATGTTAATTCATAATATATTTTTATATTCGATCATAAATTAGTTTATAT	GCTGATGCTGGACATACACCTATATTATNGGAAGCTAGAGATGTTTTAGGAGGAAATGTC----------TTCATAATACATTTTTATATTTGATCATAAATTAGTTTATAT	102	38	del	N/A
798	GCTGATGCTGGACATACACCTATATTATTGGAAGCTAGAGATGTTCTGGGAGGAAAGGTCTATATGTTAATTCATAATATATTTTTATATTCGATCATAAATTAGTTTATAT	GCTGATGCTGGACATACACCTATATTATTGGAAGCTAGAGATGTTCTGGGAGG-AAGGTCTATATGTTAATTCATAATATATTTTTATATTCGATCATAAATTAGTTTATAT	111	37	del	N/A
799	GCTGATGCTGGACATACACCTATATTATTGGAAGCTAGAGATGTTCTGGGAGGAAAGGTCTATATGTTAATTCATAATATATTTTTATATTCGATCATAAATTAGTTTATAT	ACTGATGCTGGACATACACCTATATTATTGGAAGCTAGAGATGTTCTGGGAGGAAAGGTCTATATGTTAATTCATAATATATTTTTATATTCGATCATAAATTAGTTTATAT	112	37	Sub	N/A
800	GCTGATGCTGGACATACACCTATATTATTGGAAGCTAGAGATGTTCTGGGAGGAAAGGTCTATA---TGTTAATTCATAATATATTTTT--------ATATTCGATCATAAATTAGTTTATAT	GCTGATGCTGGACATACACCTATATTACTGGAAGCTAGAGATGTTCTGGGGGGAAAGGTCTATATACTGTT-ATTCATAATA---TTTTCGAACACAATATTTGATCATAAATTAGTTTATAT	119	37	Ins	N/A
801	GCTGATGCTGGACATACACCTATATTATTGGAAGCTAGAGATGTTCTGGGAGGAAAGGTCTATATGTTAATTCATAATATATTTTTATATTCGATCATAAATTAGTTTATAT	GCTGATGCTGGACATACACCTATATTATTGGCCGCTAGAGATGTTTTAGGAGGAAATGTC----------TTCATAATACATTTTTATATTTGATCATAAATTAGTTTATAT	102	37	del	N/A
802	GCTGATGCTGGACATACACCTATATTATTGGAAGCTAGAGATGTTCTGGGAGGAAAGGTCTATATGTTAATTCATAATATATTTTTATATTCGATCATAAATTAGTTTATAT	GCTGAAGCTGGACATACACCTATATGATTGGAAGCTAGAGATGTTTTAGGAGGAAATGTC----------TTCATAATACATTTTTATATTTGATCATAAATTAGTTTATAT	102	37	del	N/A
803	GCTGATGCTGGACATACACCTATATTATTGGAAGCTAGAGATGTTCTGGGAGGAAAGGTCTATATGTTAATTCATAATATATTTTTATATTCGATCATAAATTAGTTTATAT	GCTGATGCTGGACATACACCTATATTATTGGAAGCTAAAGATGTTCTAGGAGGAAAGGTCTATATGTTAGTTCATAATATATTTTTATATTTGATCATAAATTAGTTTATAT	112	36	Sub	N/A
804	GCTGATGCTGGACATACACCTATATTATTGGAAGCTAGAGATGTTCTGGGAGGAAAGGTCTATATGTTAATTCATAATATATTTTTATATTCGATCATAAATTAGTTTATAT	GCTGATGCTGGACATACACCTATATTATTGGAAGCTAGAGATGTTTTAGGACGAAAGGTC----------TTCATAATATATTTTTATATTTGATCATAAATTAGTTTATAT	102	36	del	N/A
805	GCTGATGCTGGACATACACCTATATTATTGGAAGCTAGAGATGTTCTGGGAGGAAAGGTCTATA---TGTTAATTCATAATATATTTTT--------ATATTCGATCATAAATTAGTTTATAT	GCTGATGCTGGACATACACCTATATTATTGGAAGCTAGAGATGTTCTGGGGGGCAAGGTCTATATACTGTT-ATTCATAATA---TTTTCGAACACAATATTTGATCATAAATTAGTTTATAT	119	36	Ins	N/A
806	GCTGATGCTGGACATACACCTATATTATTGGAAGCTAGAGATGTTCTGGGAGGAAAGGTCTATATGTTAATTCATAATATATTTTTATATTCGATCATAAATTAGTTTATAT	GCTGATGCTGGACATACACCTATATTATTGGAAGCTAGAGATGTTCTAGGAGGAAAGGTCTATATGTTAGTTCATAATATATTTTTGTATTCGATCATAAATTAGTTTATAT	112	36	Sub	N/A
807	GCTGATGCTGGACATACACCTATATTATTGGAAGCTAGAGATGTTCTGGGAGGAAAGGTCTATA---TGTTAATTCATAATATATTTTT--------ATATTCGATCATAAATTAGTTTATAT	GCTGATGCTGGACATACACCTATATTATTGGAGGCTAGAGATGTTCTGGGGGGAAAGGTCTATATACTGTT-ATTCATAATA---TTTTCGAACACAATATTTGATCATAAATTAGTTTATAT	119	36	Ins	N/A
808	GCTGATGCTGGACATACACCTATATTATTGGAAGCTAGAGATGTTCTGGGAGGAAAGGTCTATATGTTAATTCATAATATATTTTTATATTCGATCATAAATTAGTTTATAT	GCTGATGCTGGACATACACCTATATTATTGGAAGCTAGAGATGTTCTGGGAGGAAAGGTCTATATTTTAATTCATAATATATTTTTATATTCGATCATAAATTAGTTTATAT	112	36	Sub	N/A
809	GCTGATGCTGGACATACACCTATATTATTGGAAGCTAGAGATGTTCTGGGAGGAAAGGTCTATATGTTAATTCATAATATATTTTTATATTCGATCATAAATTAGTTTATAT	GCTGATGCTGGACATACACCTATATTATTGGAAGCTAGAGATGTTCTGGGAGGATAGGTCTATATGTTAATTCATAATATATTTTTATATTCGATCATAAATTAGTTTATAT	112	36	Sub	N/A
810	GCTGATGCTGGACATACACCTATATTATTGGAAGCTAGAGATGTTCTGGGAGGAAAGGTCTATATGTTAATTCATAATATATTTTTATATTCGATCATAAATTAGTTTATAT	GCTGATGCTGGACATACACCTATATTATTGGAAGCTAGAGATGTTTTAGGAGGAAATGTC----------TTCATAATACA-TTTTATATTTGATCATAAATTAGTTTATAT	101	36	del	N/A
811	GCTGATGCTGGACATACACCTATATTATTGGAAGCTAGAGATGTTCTGGGAGGAAAGGTCTATATGTTAATTCATAATATATTTTTATATTCGATCATAAATTAGTTTATAT	GCTGATGCTGGACATACACCTATATTATTGGAAGCTAGAGATGTTCTGGGAGGAAAGGTCTATATGTTAATTCATAATATATTTTTATATTCGATCATAAATTAGTTTAGAT	112	36	Sub	N/A
812	GCTGATGCTGGACATACACCTATATTATTGGAAGCTAGAGATGTTCTGGGAGGAAAGGTCTATATGTTAATTCATAATATATTTTTATATTCGATCATAAATTAGTTTATAT	GCTGATGCTGGACATACACCTATATTATTGGAAGCTAGAGATGTTTTAGGAGGAAATGTC----------TTCATAATACATTTTTCTATTTGATCATAAATTAGTTTATAT	102	35	del	N/A
813	GCTGATGCTGGACATAC--------------------ACCTATATTATTGGAAGCTAGAGATGTTCTGGGAGGAAAGGTCTATA---TGTTAATTCATAATATATTTTT--------ATATTCGATCATAAATTAGTTTATAT	GCTGATGCTGGACATACACCGCTGATGCTGGACATATACCTATATTATTGGAAGCTAGAGATGTTCTGGGGGGAAAGGTCTATATACTGTT-ATTCATAATA---TTTTCGAACACAATATTTGATCATAAATTAGTTTATAT	139	35	Ins	N/A
814	GCTGATGCTGGACATACACCTATATTATTGGAAGCTAGAGATGTTCTGGGAGGAAAGGTCTATATGTTAATTCATAATATATTTTTATATTCGATCATAAATTAGTTTATAT	GCTGATGCTGGACATACACCTATATTATTGGAAGCTAGAGATGTTCTGGGAGGAAAGGTCTATATGTTAATTCATAATATATTTTTATATTCGATCATAAATTAATTTATAT	112	35	Sub	N/A
815	GCTGATGCTGGACATACACCTATATTATTGGAAGCTAGAGATGTTCTGGGAGGAAAGGTCTATATGTTAATTCATAATATATTTTTATATTCGATCATAAATTAGTTTATAT	GCTGATCCTGGACATACACCTATATTATTGGAAGCTAGAGATGTTTTAGGAGGAAAGGTC----------TTCATAATATATTTTTATATTTGATCATAAATTAGTTTATAT	102	35	del	N/A
816	GCTGATGCTGGACATACACCTATATTATTGGAAGCTAGAGATGTTCTGGGAGGAAAGGTCTATATGTTAATTCATAATATATTTTTATATTCGATCATAAATTAGTTTATAT	GCTGATGCTGGACATACACCTATATTATTGGAAGCTAGAGATGTTTTAGGAGGAAAGGGC----------TTCATAATATATTTTTATATTTGATCATAAATTAGTTTATAT	102	35	del	N/A
817	GCTGATGCTGGACATACACCTATATTATTGGAAGCTAGAGATGTTCTGGGAGGAAAGGTCTATA---TGTTAATTCATAATATATTTTT--------ATATTCGATCATAAATTAGTTTATAT	GCTGATGCTGGACATACACCTATATTATTGGAAGCTAGAGATGTTCCGGGGGGAAAGGTCTATATACTGTT-ATTCATAATA---TTTTCGAACACAATATTTGATCATAAATTAGTTTATAT	119	35	Ins	N/A
818	GCTGATGCTGGACATACACCTATATTATTGGAAGCTAGAGATGTTCTGGGAGGAAAGGTCTATATGTTAATTCATAATATATTTTTATATTCGATCATAAATTAGTTTATAT	GCTGATGCTGGACATACACCTATATTATTGGAAGCTAGAGATGTTTTAGGAGGAAAGGTC----------TTCATAATATAGTTTTATATTTGATCATAAATTAGTTTATAT	102	35	del	N/A
819	GCTGATGCTGGACATACACCTATATTATTGGAAGCTAGAGATGTTCTGGGAGGAAAGGTCTATATGTTAATTCATAATATATTTTTATATTCGATCATAAATTAGTTTATAT	GCTGATCCTGGACATACACCTATATTATTGGAAGCTAGAGATGTTCTGGGAGGAAAGGTCTATATGTTAATTCATAATATATTTTTATATTCGATCATAAATTAGTTTATAT	112	35	Sub	N/A
820	GCTGATGCTGGACATACACCTATATTATTGGAAGCTAGAGATGTTCTGGGAGGAAAGGTCTATA---TGTTAATTCATAATATATTTTTATATTCGATCATAAATTAGTTTATAT	GCTGATGCTGGACATACACCTATATTATTGGAAGCTAGAGATGTTCTGGGGGGAAAGGTCTATATACTGTT-ATTCATAATATATTTTTATATTTGATCATAAATTAGTTTATAT	114	35	Ins	N/A
821	GCTGATGCTGGACATACACCTATATTATTGGAAGCTAGAGATGTTCTGGGAGGAAAGGTCTATATGTTAATTCATAATATATTTTTATATTCGATCATAAATTAGTTTATAT	GCTGATGCTGGAAATACACCTATATTATTGGAAGCTAGAGATGTTTTAGGAGGAAATGTC----------TTCATAATACATTTTTATATTTGATCATAAATTAGTTTATAT	102	35	del	N/A
822	GCTGATGCTGGACATACACCTATATTATTGGAAGCTAGAGATGTTCTGGGAGGAAAGGTCTATATGTTAATTCATAATATATTTTTATATTCGATCATAAATTAGTTTATAT	GCTGATGCTGGACATACACCTATATTATTGGAAGCTAGAGATGTTCTGGGAGGAAAGGTCTATATGTTAATTCATAATATATTTTTATATTCGATCAGAAATTAGTTTATAT	112	35	Sub	N/A
823	GCTGATGCTGGACATACACCTATATTATTGGAAGCTAGAGATGTTCTGGGAGGAAAGGTCTATATGTTAATTCATAATATATTTTTATATTCGATCATAAATTAGTTTATAT	GCTGATGCTGGTCATACACCTATATTATTGGAAGCTAGAGATGTTTTAGGAGGAAATGTC----------TTCATAATATATTTTTATATTTGATCATAAATTAGTTTATAT	102	35	del	N/A
824	GCTGATGCTGGACATACACCTATATTATTGGAAGCTAGAGATGTTCTGGGAGGAAAGGTCTATATGTTAATTCATAATATATTTTTATA-TTCGATCATAAATTAGTTTATAT	GCTGATGCTGGACATACACCTATATTACTGGAAGCTAGAGATGTTTTAGGAGGAAAGGTC----------TTCATAATATATTTTTATATTTTGATCATAAATTAGTTTATAT	103	35	del	N/A
825	GCTGATGCTGGACATACACCTATATTATTGGAAGCTAGAGATGTTCTGGGAGGAAAGGTCTATATGTTAATTCATAATATATTTTTATATTCGATCATAAATTAGTTTATAT	GCTGAAGCTGGACATACACCTATATGATTGGAAGCTAGAGATGTTTTAGGAGGAAAGGTC----------TTCATAATATATTTTTATATTTGATCATAAATTAGTTTATAT	102	35	del	N/A
826	GCTGATGCTGGACATACACCTATATTATTGGAAGCTAGAGATGTTCTGGGAGGAAAGGTCTATATGTTAATTCATAATATATTTTTATATTCGATCATAAATTAGTTTATAT	GCTGATGCTGGACATACACCTATATTATTGGAAGCTAGAGATGTTCT-GGAGGAAAGGTCTATATGTTAATTCATAATATATTTTTATATTCGATCATAAATTAGTTTATAT	111	34	del	N/A
827	GCTGATGCTGGACATACACCTATATTATTGGAAGCTAGAGATGTTCTGGGAGGAAAGGTCTATATGTTAATTCATAATATATTTTTATATTCGATCATAAATTAGTTTATAT	GCTGATGCTGGACATACACCTATATTATTGGAAGCTAGAGATGTTTTAGGAGGAAATGT----------ATTCATAATACATTTTTATATTTGATCATAAATTAGTTTATAT	102	34	del	N/A
828	GCTGATGCTGGACATACACCTATATTATTGGAAGCTAGAGATGTTCTGGGAGGAAAGGTCTATATGTTAATTCATAATATATTTTTATATTCGATCATAAATTAGTTTATAT	GCTGATGCTGGACATACACCTATATTATTGGAAGCTAGAGTTGTTTTAGGAGGAAAGGTC----------TTCATAATATATTTTTATATTTGATCATAAATTAGTTTATAT	102	34	del	N/A
829	GCTGATGCTGGACATACACCTATATTATTGGAAGCTAGAGATGTTCTGGGAGGAAAGGTCTATATGTTAATTCATAATATATTTTTATATTCGATCATAAATTAGTTTATAT	GCTGATGCTGGACATACACCTATATTATTGGAAGCTAGAGATGTTCTATGAGGAAAGGTCTATATGTTAATTCATAATATATTTTTATATTCGATCATAAATTAGTTTATAT	112	34	Sub	N/A
830	GCTGATGCTGGACATACACCTATATTATTGGAAGCTAGAGATGTTCTGGGAGGAAAGGTCTATATGTTAATTCATAATATATTTTTATATTCGATCATAAATTAGTTTATAT	GCTGATGCTGGACATACACCTATATTATTCGAAGCTAGAGATGTTTTAGGAGGAAAGGTC----------TTCATAATATATTTTTATATTTGATCATAAATTAGTTTATAT	102	33	del	N/A
831	GCTGATGCTGGACATACACCTATATTATTGGAAGCTAGAGATGTTCTGGGAGGAAAGGTCTATATGTTAATTCATAATATATTTTTATATTCGATCATAAATTAGTTTATAT	GCTGATGCTGGACATACACCTATATTATTGGAAGCTAGAGATGTTTTAGGAGGAAAGGTC----------TTCATAATATATTTTTATATTTGCTCATAAATTAGTTTATAT	102	33	del	N/A
832	GCTGATGCTGGACATACACCTATATTATTGGAAGCTAGAGATGTTCTGGGAGGAAAGGTCTATATGTTAATTCATAATATATTTTTATATTCGATCATAAATTAGTTTATAT	GCTGATGCTGGACATACACCTATATTATTGGAAGCTAGAGATGTTCTGGGAGGAAAGGTCTATATGTTAGTTCATAATATAGTTTTATATTCGATCATAAATTAGTTTATAT	112	33	Sub	N/A
833	GCTGATGCTGGACATACACCTATATTATTGGAAGCTAGAGATGTTCTGGGAGGAAAGGTCTATATGTTAATTCATAATATATTTTTATATTCGATCATAAATTAGTTTATAT	GCTGATGCTGGACATACACCTATATTATGGGAAGCTAGAGATGTTTTAGGAGGAAATGTC----------TTCATAATATATTTTTATATTTGATCATAAATTAGTTTATAT	102	33	del	N/A
834	GCTGATGCTGGACATACACCTATATTATTGGAAGCTAGAGATGTTCTGGGAGGAAAGGTCTATATGTTAATTCATAATATATTTTTATATTCGATCATAAATTAGTTTATAT	GCTGATGCTGGACATACACCTATATTATTGGAAGCTAGAGATGTTCTGGGTGGAAAGGTCTATATGTTAATTCATAATATATTTTTATATTCGATCATAAATTAGTTTATAT	112	33	Sub	N/A
835	GCTGATGCTGGACATACACCTATATTATTGGAAGCTAGAGATGTTCTGGGAGGAAAGGTCTATATGTTAATTCATAATATATTTTTATATTCGATCATAAATTAGTTTATAT	GCTGATGCTGGACATACACCTATATTATTGGAAGCTAGTGATGTTTTAGGAGGAAAGGTC----------TTCATAATATATTTTTATATTTGATCATAAATTAGTTTATAT	102	33	del	N/A
836	GCTGATGCTGGACATACACCTATATTATTGGAAGCTAGAGATGTTCTGGGAGGAAAGGTCTATA---TGTTAATTCATAATATATTTTT--------ATATTCGATCATAAATTAGTTTATAT	GCTGATGCTGGACATACACCTATATTATTGGAAGCTAGGGATGTTCTGGGGGGAAAGGTCTATATACTGTT-ATTCATAATA---TTTTCGAACACAATATTTGATCATAAATTAGTTTATAT	119	33	Ins	N/A
837	GCTGATGCTGGACATACACCTATATTATTGGAAGCTAGAGATGTTCT-GGGAGGAAAGGTCTATA---TGTTAATTCATAATATATTTTT--------ATATTCGATCATAAATTAGTTTATAT	GCTGATGCTGGACATACACCTATATTATTGGAAGCTAGAGATGTTCTGGGGGGGAAAGGTCTATATACTGTT-ATTCATAATA---TTTTCGAACACAATATTTGATCATAAATTAGTTTATAT	120	33	Ins	N/A
838	GCTGATGCTGGACATACACCTATATTATTGGAAGCTAGAGATGTTCTGGGAGGAAAGGTCTATATGTTAATTCATAATATATTTTTATATTCGATCATAAATTAGTTTATAT	GCTGATGCTGGACATACACCTATATTATTGGAAGCTTGAGATGTTCTGGGAGGAAAGGTCTATATGTTAATTCATAATATATTTTTATATTCGATCATAAATTAGTTTATAT	112	33	Sub	N/A
839	GCTGATGCTGGACATACACCTATATTATTGGAAGCTAGAGATGTTCTGGGAGGAAAGGTCTATATGTTAATTCATAATATATTTTTATA-TTCGATCATAAATTAGTTTATAT	GCTGATGCTGGACATACACCTATATTATTGGACGCTAGAGATGTTTTAGGAGGAAAGGTC----------TTCATAATATATTTTTATATTTTGATCATAAATTAGTTTATAT	103	33	del	N/A
840	GCTGATGCTGGACATACACCTATATTATTGGAAGCTAGAGATGTTCTGGGAGGAAAGGTCTATATGTTAATTCATAATATATTTTTATATTCGATCATAAATTAGTTTATAT	GCGGATGCTGGACATACACCTATATTATTGGAAGCGAGAGATGTTTTAGGAGGAAATGTC----------TTCATAATACATTTTTATATTTGATCATAAATTAGTTTATAT	102	33	del	N/A
841	GCTGATGCTGGACATACACCTATATTATTGGAAGCTAGAGATGTTCTGGGAGGAAAGGTCTATATGTTAATTCATAATATATTTTTATATTCGATCATAAATTAGTTTATAT	GCTGATGCTGGACATACACCTATATTACTGGACGCTAGAGATGTTTTAGGAGGAAAGGTC----------TTCATAATATATTTTTATATTTGATCATAAATTAGTTTATAT	102	33	del	N/A
842	GCTGATGCTGGACATACACCTATATTATTGGAAGCTAGAGATGTTCTGGGAGGAAAGGTCTATATGTTAATTCATAATATATTTTTATATTCGATCATAAATTAGTTTATAT	GCTGATGCTGGACATACACCTATACTATTGGAAGCTAGAGATGTTCTGGGAGGAAATGTC----------TTCATAATACATTTTTATATTTGATCATAAATTAGTTTATAT	102	32	del	N/A
843	GCTGATGCTGGACATACACCTATATTATTGGAAGCTAGAGATGTTCTGGGAGGAAAGGTCTATATGTTAATTCATAATATATTTTTATATTCGATCATAAATTAGTTTATAT	GCTGATGCTCGACATACACCTATATTATTGGAAGCTAGAGATGTTTTAGGAGGAAATGTC----------TTCATAATACATTTTTATATTTGATCATAAATTAGTTTATAT	102	32	del	N/A
844	GCTGATGCTGGACATACACCTATATTATTGGAAGCTAGAGATGTTCTGGGAGGAAAGGTCTATA---TGTTAATTCATAATATATTTTT--------ATATTCGATCATAAATTAGTTTATAT	GCTGCTGCTGGACATACACCTATATTATTGGAAGCTAGAGATGTTCTGGGGGGAAAGGTCTATATACTGTT-ATTCATAATA---TTTTCGAACACAATATTTGATCATAAATTAGTTTATAT	119	32	Ins	N/A
845	GCTGATGCTGGACATACACCTATATTATTGGAAGCTAGAGATGTTCTGGGAGGAAAGGTCTATATGTTAATTCATAATATATTTTTATATTCGATCATAAATTAGTTTATAT	GCTGATGCTGGACATACACCTATATTATTGGAAGCTAGAGATGTTCTGGGAGGAAAGGTCTAAATGTTAATTCATAATATATTTTTATATTCGATCATAAATTAGTTTATAT	112	32	Sub	N/A
846	GCTGATGCTGGACATACACCTATATTATTGGAAGCTAGAGATGTTCTGGGAGGAAAGGTCTATATGTTAATTCATAATATATTTTTATATTCGATCATAAATTAGTTTATAT	GCTGATGCTGGACATACACCTATATTATTTGAAGCTAGAGATGTTTTAGGAGGAAATGTC----------TTCATAATATATTTTTATATTTGATCATAAATTAGTTTATAT	102	32	del	N/A
847	GCTGATGCTGGACATACACCTATATTATTGGAAGCTAGAGATGTTCTGGGAGGAAAGGTCTATATGTTAATTCATAATATATTTTTATATTCGATCATAAATTAGTTTATAT	GCTGATGCTGGACATACACCTATATTATTGGAAGCTCGAGCTGTTCTGGGAGGAAAGGTCTATATGTTAATTCATAATATATTTTTATATTCGATCATAAATTAGTTTATAT	112	32	Sub	N/A
848	GCTGATGCTGGACATACACCTATATTATTGGAAGCTAGAGATGTTCTGGGAGGAAAGGTCTATATGTTAATTCATAATATATTTTTATATTCGATCATAAATTAGTTTATAT	GCTGATGCTGGACATACACCTATATTATTGGAAGCTAGAGATGTTTTAGGAGGAAAGGTC----------TTCATAATATATTTTTATATTTGATCATAAATGAGTTTATAT	102	32	del	N/A
849	GCTGATGCTGGACATACACCTATATTATTGGAAGCTAGAGATGTTCTGGGAGGAAAGGTCTATATGTTAATTCATAATATATTTTTATATTCGATCATAAATTAGTTTATAT	GCTGATGCTGGACATACACCTATATTATTGGAAGCTAGAGATGTTTTAGGAGGAAAGGTC----------TTCATAATAGATTTTTATATTTGATCATAAATTAGTTTATAT	102	32	del	N/A
850	GCTGATGCTGGACATACACCTATATTATTGGAAGCTAGAGATGTTCTGGGAGGAAAGGTCTATATGTTAATTCATAATATATTTTTATATTCGATCATAAATTAGTTTATAT	GCTGATGCTGGACATACACCTATATTATTGGAAGCTAGAGATGTTTTAGGAGGAAAGGT----------ATTCATAATATATTTTTATATTTGATCATAAATTAGTTTATAT	102	32	del	N/A
851	GCTGATGCTGGACATACACCTATATTATTGGAAGCTAGAGATGTTCTGGGAGGAAAGGTCTATATGTTAATTCATAATATATTTTTATATTCGATCATAAATTAGTTTATAT	GCTGATGCTGGACATACACCTATATTATTGGAAGCTAGAGATGTTTTAGGAGGAAATGTC----------TTCATAATACATTTTTATATTTGATCATAAATTAGTGTATAT	102	32	del	N/A
852	GCTGATGCTGGACATACACCTATATTATTGGAAGCTAGAGATGTTCTGGGAGGAAAGGTCTATATGTTAATTCATAATATATTTTTATATTCGATCATAAATTAGTTTATAT	GCTGATGCTGGACATACACCTATATTATTGGAAGCTAGAGATGTTTTAGGAGGAAAGGTCTATATGTTAGTTCATAATATATTTTTATATTCGATCATAAATTAGTTTATAT	112	32	Sub	N/A
853	GCTGATGCTGGACATACACCTATATTATTGGAAGCTAGAGATGTTCTGGGAGGAAAGGTCTATATGTTAATTCATAATATATTTTTATA-TTCGATCATAAATTAGTTTATAT	GCTGATGCTGGATATACACCTATATTATTGGAAGCTAGAGATGTTTTAGGAGGAAAGGTC----------TTCATAATATATTTTTATATTTTGATCATAAATTAGTTTATAT	103	32	del	N/A
854	GCTGATGCTGGACATACACCTATATTATTGGAAGCTAGAGATGTTCTGGGAGGAAAGGTCTATATGTTAATTCATAATATATTTTTATATTCGATCATAAATTAGTTTATAT	GCTGATGCTGGACATACACCTATATTATTGGAAGCTAGAGATGTTTTAGGAGGAAA----------TTTCTTCATAATACATTTTTATATTTGATCATAAATTAGTTTATAT	102	32	del	N/A
855	GCTGATGCTGGACATACACCTATATTATTGGAAGCTAGAGATGTTCTGGGAGGAAAGGTCTATATGTTAATTCATAATATATTTTTATATTCGATCATAAATTAGTTTATAT	GCTGATGCTGGACATACACCTATATTATTGGAAGCTAGAGATGTTTTAGGAGGTAAGGTC----------TTCATAATATATTTTTATATTTGATCATAAATTAGTTTATAT	102	32	del	N/A
856	GCTGATGCTGGACATACACCTATATTATTGGAAGCTAGAGATGTTCTGGGAGGAAAGGTCTATATGTTAATTCATAATATATTTTTATATTCGATCATAAATTAGTTTATAT	GCTGATGCTGGACATACACCTATATTATAGGAAGCTAGAGATGTTTTAGGAGGAAATGTC----------TTCATAATACATTTTTATATTTGATCATAAATTAGTTTATAT	102	31	del	N/A
857	GCTGATGCTGGACATACACCTATATTATTGGAAGCTAGAGATGTTCTGGGAGGAAAGGTCTATA---TGTTAATTCATAATATATTTTT--------ATATTCGATCATAAATTAGTTTATAT	GCTGATGCTGGACATACACCTATATTATTTGAAGCTAGAGATGTTCTGGGGGGAAAGGTCTATATACTGTT-ATTCATAATA---TTTTCGAACACAATATTTGATCATAAATTAGTTTATAT	119	31	Ins	N/A
858	GCTGATGCTGGACATACACCTATATTATTGGAAGCTAGAGATGTTCTGGGAGGAAAGGTCTATATGTTAATTCATAATATATTTTTATATTCGATCATAAATTAGTTTATAT	GCTGATGCTGGACATACACCTATATTATTGGAAGCGAGAGATGTTTTAGGAGGAAAGGTC----------TTCATAATATATTTTTGTATTTGATCATAAATTAGTTTATAT	102	31	del	N/A
859	GCTGATGCTGGACATACACCTATATTATTGGAAGCTAGAGATGTTCTGGGAGGAAAGGTCTATATGTTAATTCATAATATATTTTTATATTCGATCATAAATTAGTTTATAT	GCTGATGCTGGACATACACCTATATTATTGGAAGCTAGAGATGTTTTAAGAGGAAAGGTCTATATGTTAATTCATAATATATTTTTATATTCGATCATAAATTAGTTTATAT	112	31	Sub	N/A
860	GCTGATGCTGGACATACACCTATATTATTGGAAGCTAGAGATGTTCTGGGAGGAAAGGTCTATATGTTAATTCATAATATATTTTTATATTCGATCATAAATTAGTTTATAT	GCTGATGCTGGACATACACCTATATTATTGGAAGCTAGAGATGTTCTGGGAGGAAAGGTCTATATGTTAATTCATAAGATATTTTTATATTCGATCATAAATTAGTTTATAT	112	31	Sub	N/A
861	GCTGATGCTGGACATACACCTATATTATTGGAAGCTAGAGATGTTCTGGGAGGAAAGGTCTATATGTTAATTCATAATATATTTTTATATTCGATCATAAATTAGTTTATAT	GCTGATGCTGGACATACACCTATATTATAGGAAGCTAGAGATGTTCTGGGAGGAAAGGTCTATATGTTAATTCATAATATATTTTTATATTCGATCATAAATTAGTTTATAT	112	31	Sub	N/A
862	GCTGATGCTGGACATAC--------------------ACCTATATTATTGGAAGCTAGAGATGTTCTGGGAGGAAAGGTCTATA---TGTTAATTCATAATATATTTTT--------ATATTCGATCATAAATTAGTTTATAT	GCTGATGCTGGACATACACCGCTGATGCTGGACATATACCTATATTATTGGAAGCTAGAGATGTTCTGGGGGGAAAGGTCTATACACTGTT-ATTCATAATA---TTTTCGAACACAATATTTGATCATAAGTTAGTTTATAT	139	31	Ins	N/A
863	GCTGATGCTGGACATACACCTATATTATTGGAAGCTAGAGATGTTCTGGGAGGAAAGGTCTATATGTTAATTCATAATATATTTTTATA-TTCGATCATAAATTAGTTTATAT	GCTGATGCTGGCCATACACCTATATTATTGGAAGCTAGAGATGTTTTAGGAGGAAAGGTC----------TTCATAATATATTTTTATATTTTGATCATAAATTAGTTTATAT	103	31	del	N/A
864	GCTGATGCTGGACATACACCTATATTATTGGAAGCTAGAGATGTTCTGGGAGGAAAGGTCTATATGTTAATTCATAATATATTTTTATATTCGATCATAAATTAGTTTATAT	GCTGATGCTGGACATACACCTATATTATTGGAAGCTAGAGATGTTTTAGGAGGAAAGGTC----------TTCATAATATATTTTTATATTTGATCATAAATTAATTTATAT	102	31	del	N/A
865	GCTGATGCTGGACATACACCTATATTATTGGAAGCTAGAGATGTTCTGGGAGGAAAGGTCTATATGTTAATTCATAATATATTTTTATATTCGATCATAAATTAGTTTATAT	GCTGATGCTGGACATACACCTATATTATTGGAAGCTAGAGATGTTTTAGGAGGAAAGGTC----------TTCATAATATATTATTATATTTGATCATAAATTAGTTTATAT	102	31	del	N/A
866	GCTGATGCTGGACATACACCTATATTATTGGAAGCTAGAGATGTTCTGGGAGGAAAGGTCTATATGTTAATTCATAATATATTTTTATATTCGATCATAAATTAGTTTATAT	GCTGATGCTGGACATACACCTATATTATTGGAAGCTAGAGATGTTTTAGGAGGAAAGGTC----------TTCATAATATATTTTTATATTTGATCATATATTAGTTTATAT	102	31	del	N/A
867	GCTGATGCTGGACATACACCTATATTATTGGAAGCTAGAGATGTTCTGGGAGGAAAGGTCTATA---TGTTAATTCATAATATATTTTT--------ATATTCGATCATAAATTAGTTTATAT	GCTGATGCTGGACATACACCTATATTATTGGAAGCTAGAGATGTTCTTGGGGGAAAGGTCTATATACTGTT-ATTCATAATA---TTTTCGAACACAATATTTGATCATAAATTAGTTTATAT	119	30	Ins	N/A
868	GCTGATGCTGGACATACACCTATATTATTGGAAGCTAGAGATGTTCTGGGAGGAAAGGTCTATATGTTAATTCATAATATATTTTTATATTCGATCATAAATTAGTTTATAT	GCTGATGCTGGACATACACCTATATTCTTGGAAGCTAGAGATGTTTTAGGAGGAAATGTC----------TTCATAATATATTTTTATATTTGATCATAAATTAGTTTATAT	102	30	del	N/A
869	GCTGATGCTGGACATACACCTATATTATTGGAAGCTAGAGATGTTCTGGGAGGAAAGGTCTATATGTTAATTCATAATATATTTTTATATTCGATCATAAATTAGTTTATAT	GCTGATGCTGGACATACACCTATATTATTGGAAGCTAGAGATGTATTAGGAGGAAATGTC----------TTCATAATACATTTTTATATTTGATCATAAATTAGTTTATAT	102	30	del	N/A
870	GCTGATGCTGGACATACACCTATATTATTGGAAGCTAGAGATGTTCTGGGAGGAAAGGTCTATATGTTAATTCATAATATATTTTTATATTCGATCATAAATTAGTTTATAT	GCTGATGCTGGACATACACCTATATGATTGGAAGCTAGAGATGGTCTGGGAGGAAAGGTCTATATGTTAATTCATAATATATTTTTATATTCGATCATAAATTAGTTTATAT	112	30	Sub	N/A
871	GCTGATGCTGGACATACACCTATATTATTGGAAGCTAGAGATGTTCTGGGAGGAAAGGTCTATATGTTAATTCATAATATATTTTTATATTCGATCATAAATTAGTTTATAT	GCTGATGCTGGACATACACCTATATTATTGGAAGCTAGAGATGTTCTGGGAGGAAAGGTCTATATGTTATTTCATAATATATTTTTATATTCGATCATAAATTAGTTTATAT	112	30	Sub	N/A
872	GCTGATGCTGGACATACACCTATATTATTGGAAGCTAGAGATGTTCTGGGAGGAAAGGTCTATATGTTAATTCATAATATATTTTTATATTCGATCATAAATTAGTTTATAT	ACTGATGCTGGACATACACCTATATTATTGGAAGCTAGAGATGTTTTAGGAGGAAATGTC----------TTCATAATACATTTTTATATTTGATCATAAATTAGTTTATAT	102	30	del	N/A
873	GCTGATGCTGGACATACACCTATATTATTGGAAGCTAGAGATGTTCTGGGAGGAAAGGTCTATA---TGTTAATTCATAATATATTTTT--------ATATTCGATCATAAATTAGTTTATAT	GTTGATGCTGGACATACACCTATATTATTGGAAGCTAGAGATGTTCTGGGGGGAAAGGTCTATATACTGTT-ATTCATAATA---TTTTCGAACACAATATTTGATCATAAATTAGTTTATAT	119	30	Ins	N/A
874	GCTGATGCTGGACATACACCTATATTATTGGAAGCTAGAGATGTTCTGGGAGGAAAGGTCTATA---TGTTAATTCATAATATATTTTT--------ATATTCGATCATAAATTAGTTTATAT	GCTGATGCTGGTCATACACCTATATTATTGGAAGCTAGAGATGTTCTGGGGGGAAAGGTCTATATACTGTT-ATTCATAATA---TTTTCGAACACAATATTTGATCATAAATTAGTTTATAT	119	30	Ins	N/A
875	GCTGATGCTGGACATACACCTATATTATTGGAAGCTAGAGATGTTCTGGGAGGAAAGGTCTATATGTTAATTCATAATATATTTTTATATTCGATCATAAATTAGTTTATAT	GCTGATGCTGGACATACACCTATATTATTGGAAGATAGAGATGTCTTAGGAGGAAATGTC----------TTCATAATACATTTTTATATTTGATCATAAATTAGTTTATAT	102	30	del	N/A
876	GCTGATGCTGGACATACACCTATATTATTGGAAGCTAGAGATGTTCTGGGAGGAAAGGTCTATATGTTAATTCATAATATATTTTTATATTCGATCATAAATTAGTTTATAT	GCTGATGCTGGACATACACCTATATTATTGGAAGCTAGAGATGTTCTGGGAGGAAAGGTCTATATGTTAATTCATAATATATTTTTATATTCGATCATAAATTAGTTTCTAT	112	29	Sub	N/A
877	GCTGATGCTGGACATACACCTATATTATTGGAAGCTAGAGATGTTCTGGGAGGAAAGGTCTATATGTTAATTCATAATATATTTTTATATTCGATCATAAATTAGTTTATAT	GCTGATGCTGGACATACACCTATATTATTGGAAGCTAGAGATGTGTTAGGAGGAAATGTC----------TTCATAATATATTTTTATATTTGATCATAAATTAGTTTATAT	102	29	del	N/A
878	GCTGATGCTGGACATACACCTATATTATTGGAAGCTAGAGATGTTCTGGGAGGAAAGGTCTATATGTTAATTCATAATATATTTTTATATTCGATCATAAATTAGTTTATAT	GCTGATCCTGGACATACACCTATATTATTGGAAGCTAGAGATGTTTTAGGAGGAAATGTC----------TTCATAATACATTTTTATATTTGATCATAAATTAGTTTATAT	102	29	del	N/A
879	GCTGATGCTGGACATACACCTATATTATTGGAAGCTAGAGATGTTCTGGGAGGAAAGGTCTATATGTTAATTCATAATATATTTTTATATTCGATCATAAATTAGTTTATAT	GCTGATGCTGGACATACACCTATATTATTGGAAGCTAGAGATGTTTTAGGAGGAAAGGTC----------TTCATAATATATTTGTATATTTGATCATAAATTAGTTTATAT	102	29	del	N/A
880	GCTGATGCTGGACATACACCTATATTATTGGAAGCTAGAGATGTTCTGGGAGGAAAGGTCTATATGTTAATTCATAATATATTTTTATATTCGATCATAAATTAGTTTATAT	GCTGATGCTGGACATACACCTATATTATTGGAAGCTAGAGATGTTCTGGGAGGAAAGGTCTATATGTTAATTCATAATATATTTTTATAGTCGATCATAAATTAGTTTATAT	112	29	Sub	N/A
881	GCTGATGCTGGACATACACCTATATTATTGGAAGCTAGAGATGTTCTGGGAGGAAAGGTCTATATGTTAATTCATAATATATTTTTATATTCGATCATAAATTAGTTTATAT	GCTGATGCTGGACATACACCTATATTATTGGAAGTTAGAGATGTTTTAGGAGGAAATGTC----------TTCATAATATATTTTTATATTTGATCATAAATTAGTTTATAT	102	29	del	N/A
882	GCTGATGCTGGACATACACCTATATTATTGGAAGCTAGAGATGTTCTGGGAGGAAAGGTCTATA---TGTTAATTCATAATATATTTTT--------ATATTCGATCATAAATTAGTTTATAT	GCTGATGCTGGACATACACCTATATTATTGGAAGCTAGAGATGTTCTGGGGGGAAAGGTCTATATACTGTT-ATTCATAATA---TTTTCAAACACAATATTTGATCATAAATTAGTTTATAT	119	29	Ins	N/A
883	GCTGATGCTGGACATACACCTATATTATTGGAAGCTAGAGATGTTCTGGGAGGAAAGGTCTATATGTTAATTCATAATATATTTTTATATTCGATCATAAATTAGTTTATAT	GCTGATGCTGGACATACACCTATATTATTGGAAGCTAGAGATGTTTTAGGAGGAAATGTC----------TTCATAATACATTTATATATTTGATCATAAATTAGTTTATAT	102	29	del	N/A
884	GCTGATGCTGGACATACACCTATATTATTGGAAGCTAGAGATGTTCTGGGAGGAAAGGTCTATATGTTAATTCATAATATATTTTTATATTCGATCATAAATTAGTTTATAT	GCTGATGCTGGACATACACCTATATTATTGGCCGCTAGAGATGTTCTGGGAGGAAAGGTCTATATGTTAATTCATAATATATTTTTATATTCGATCATAAATTAGTTTATAT	112	29	Sub	N/A
885	GCTGATGCTGGACATACACCTATATTATTGGAAGCTAGAGATGTTCTGGGAGGAAAGGTCTATATGTTAATTCATAATATATTTTTATATTCGATCATAAATTAGTTTATAT	GCTGATGCTGGACATACACCTATATTATTGGAGGCTAGAGATGTTTTAGGAGGAAATGTC----------TTCATAATATATTTTTATATTTGATCATAAATTAGTTTATAT	102	29	del	N/A
886	GCTGATGCTGGACATACACCTATATTATTGGAAGCTAGAGATGTTCTGGGAGGAAAGGTCTATATGTTAATTCATAATATATTTTTATATTCGATCATAAATTAGTTTATAT	GCTGATGCTGGACATACACCTATATTATTGGAAGCTAGAGATGTTGTAGGAGGAAATGTC----------TTCATAATATATTTTTATATTTGATCATAAATTAGTTTATAT	102	29	del	N/A
887	GCTGATGCTGGACATACACCTATATTATTGGAAGCTAGAGATGTTCTGGGAGGAAAGGTCTATATGTTAATTCATAATATATTTTTATATTCGATCATAAATTAGTTTATAT	GTTGATGCTGGACATACACCTATATTATTGGAAGCTAGAGATGTTTTAGGAGGAAATGTC----------TTCATAATATATTTTTATATTTGATCATAAATTAGTTTATAT	102	29	del	N/A
888	GCTGATGCTGGACATACACCTATATTATTGGAAGCTAGAGATGTTCTGGGAGGAAAGGTCTATATGTTAATTCATAATATATTTTTATATTCGATCATAAATTAGTTTATAT	GCTGATGCTGGACATACACCTATATTATTGGAAGCTAGAGATGTTCTGGGAGGAAAGGTCTATATCTTAATTCATAATATATTTTTATATTCGATCATAAATTAGTTTATAT	112	29	Sub	N/A
889	GCTGATGCTGGACATACACCTATATTATTGGAAGCTAGAGATGTTCTGGGAGGAAAGGTCTATATGTTAATTCATAATATATTTTTATATTCGATCATAAATTAGTTTATAT	GCTGATGCTGGACATACACCTATATGATTGGAAGCTAGAGAGGTTCTGGGAGGAAAGGTCTATATGTTAATTCATAATATATTTTTATATTCGATCATAAATTAGTTTATAT	112	29	Sub	N/A
890	GCTGATGCTGGACATACACCTATATTATTGGAAGCTAGAGATGTTCTGGGAGGAAAGGTCTATATGTTAATTCATAATATATTTTTATATTCGATCATAAATTAGTTTATAT	GCTGATGCTGGACATACACCTATATTATTGGAAGCTAGAGATGTTTTAGGAGGAAATGT----------GTTCATAATACATTTTTATATTTGATCATAAATTAGTTTATAT	102	29	del	N/A
891	GCTGATGCTGGACATACACCTATATTATTGGAAGCTAGAGATGTTCTGGGAGGAAAGGTCTATATGTTAATTCATAATATATTTTTATATTCGATCATAAATTAGTTTATAT	GCTGATGCTGGACATACACCTATATTTTTGGAAGCTAGAGATGTTTTAGGAGGAAAGGTC----------TTCATAATATATTTTTATATTTGATCATAAATTAGTTTATAT	102	28	del	N/A
892	GCTGATGCTGGACATACACCTATATTATTGGAAGCTAGAGATGTTCTGGGAGGAAAGGTCTATATGTTAATTCATAATATATTTTTATATTCGATCATAAATTAGTTTATAT	GCTGATGCTGGACATACACCTATATTATTGGAAGCTAGAGATGTTCTGGGGGGAAAGGTCTATATGTTAATTCATAATATATTTTTATATTTGATCATAAATTAGTTTATAT	112	28	Sub	N/A
893	GCTGATGCTGGACATACACCTATATTATTGGAAGCTAGAGATGTTCTGGGAGGAAAGGTCTATA---TGTTAATTCATAATATATTTTT--------ATATTCGATCATAAATTAGTTTATAT	GCTGATGCTGGACATCCACCTATATTATTGGAAGCTAGAGATGTTCTGGGGGGAAAGGTCTATATACTGTT-ATTCATAATA---TTTTCGAACACAATATTTGATCATAAATTAGTTTATAT	119	28	Ins	N/A
894	GCTGATGCTGGACATACACCTATATTATTGGAAGCTAGAGATGTTCTGGGAGGAAAGGTCTATATGTTAATTCATAATATATTTTTATATTCGATCATAAATTAGTTTATAT	GCTGATGCTGGACATACACCTATATTATTGGAAGCTAGAGATGTTCTGGGAGGAAAGGTCTATATGTTAATTCATAATATATTTTTATATTCGATCATAAATTAGTATATAT	112	28	Sub	N/A
895	GCTGATGCTGGACATACACCTATATTATTGGAAGCTAGAGATGTTCTGGGAGGAAAGGTCTATATGTTAATTCATAATATATTTTTATATTCGATCATAAATTAGTTTATAT	GCTGATGCTGGACATACACCTATATTACTGGAAGCTAGAGATGTTTTAGGAGGAAATGTC----------TTCATAATATATTTTTATATTTGATCATAAATTAGTTTATAT	102	28	del	N/A
896	GCTGATGCTGGACATACACCTATATTATTGGAAGCTAGAGATGTTCTGGGAGGAAAGGTCTATATGTTAATTCATAATATATTTTTATATTCGATCATAAATTAGTTTATAT	GCTGATGCTGGACATACACCTATATTATTGGAAGCTAGAGATGTTTTAGGAGGAAATGTC----------TTCATAATACATTTTTATATTTGATCAGAAATTAGTTTATAT	102	28	del	N/A
897	GCTGATGCTGGACATACACCTATATTATTGGAAGCTAGAGATGTTCTGGGAGGAAAGGTCTATATGTTAATTCATAATATATTTTTATATTCGATCATAAATTAGTTTATAT	GCTGATGCTGGACATACACCTATATTATTGGAAGCTAGAGATGTTTTAGGAGGAAAGGTC----------ATCATAATATATTTTTATATTTGATCATAAATTAGTTTATAT	102	28	del	N/A
898	GCTGATGCTGGACATACACCTATATTATTGGAAGCTAGAGATGTTCTGGGAGGAAAGGTCTATATGTTAATTCATAATATATTTTTATATTCGATCATAAATTAGTTTATAT	GCTGATGCTGGACATACACCTATATTATTGGAAGCTAGAGATGTTTTAGGTGGAAAGGTC----------TTCATAATATATTTTTATATTTGATCATAAATTAGTTTATAT	102	28	del	N/A
899	GCTGATGCTGGACATACACCTATATTATTGGAAGCTAGAGATGTTCTGGGAGGAAAGGTCTATATGTTAATTCATAATATATTTTTATATTCGATCATAAATTAGTTTATAT	GCTGATGCTGGACATACACCTATACTATTGGAAGCTAGAGATGTTTTAGGAGGAAAGGTC----------TTCATAATATATTTTTATATTCGATCATAAATTAGTTTATAT	102	28	del	N/A
900	GCTGATGCTGGACATACACCTATATTATTGGAAGCTAGAGATGTTCTGGGAGGAAAGGTCTATATGTTAATTCATAATATATTTTTATATTCGATCATAAATTAGTTTATAT	GCTGATGCTGGACATACACCTATATTATTGGAAGCTAGAGATGTTCTGCGAGGAAAGGTCTATATGTTAATTCATAATATATTTTTATATTCGATCATAAATTAGTTTATAT	112	28	Sub	N/A
901	GCTGATGCTGGACATACACCTATATTATTGGAAGCTAGAGATGTTCTGGGAGGAAAGGTCTATA---TGTTAATTCATAATATATTTTT--------ATATTCGATCATAAATTAGTTTATAT	GCTGATGCTGGACATACACCTATATTATTGGAAGCTCGAGATGTTCTGGGGGGAAAGGTCTATATACTGTT-ATTCATAATA---TTTTCGAACACAATATTTGATCATAAATTAGTTTATAT	119	28	Ins	N/A
902	GCTGATGCTGGACATACACCTATATTATTGGAAGCTAGAGATGTTCTGGGAGGAAAGGTCTATATGTTAATTCATAATATATTTTTATATTCGATCATAAATTAGTTTATAT	GCTGATTCTGGACATACACCTATATTATTGGAAGCTAGAGATGTTTTAGGAGGAAATGTC----------TTCATAATATATTTTTATATTTGATCATAAATTAGTTTATAT	102	28	del	N/A
903	GCTGATGCTGGACATACACCTATATTATTGGAAGCTAGAGATGTTCTGGGAGGAAAGGTCTATATGTTAATTCATAATATATTTTTATATTCGATCATAAATTAGTTTATAT	GCTGATGCTGGACTTACACCTATATTATTGGAAGCTAGAGATGTTCTGGGAGGAAAGGTCTATATGTTAATTCATAATATATTTTTATATTTGATCATAAATTAGTTTATAT	112	28	Sub	N/A
904	GCTGATGCTGGACATACACCTATATTATTGGAAGCTAGAGATGTTCTGGGAGGAAAGGTCTATAT---GTTAATTCATAATATATTTTT--------ATATTCGATCATAAATTAGTTTATAT	GCTGATGCTGGACATACACCTATATTATTGGAAGCTAGAGATGTTCTGGGGGGAAAGGTCTATATACCGTT-ATTCATAATA---TTTTCGAACACAATATTTGATCATAAATTAGTTTATAT	119	28	Ins	N/A
905	GCTGATGCTGGACATACACCTATATTATTGGAAGCTAGAGATGTTCTGGGAGGAAAGGTCTATATGTTAATTCATAATATATTTTTATATTCGATCATAAATTAGTTTATAT	GCTGATGCTGGACATACACCTATATTATTGGAAGCTAGAGATGTTTTAGGAGGAACTGTC----------TTCATAATACATTTTTATATTTGATCATAAATTAGTTTATAT	102	28	del	N/A
906	GCTGATGCTGGACATACACCTATATTATTGGAAGCTAGAGATGTTCTGGGAGGAAAGGTCTATATGTTAATTCATAATATATTTTTATATTCGATCATAAATTAGTTTATAT	GCTGATGCTGGACATACACCTATATTATTGGAAGCTAGAGATGTTTTAGGAGGAACGGTC----------TTCATAATATATTTTTATATTTGATCATAAATTAGTTTATAT	102	28	del	N/A
907	GCTGATGCTGGACATACACCTATATTATTGGAAGCTAGAGATGTTCTGGGAGGAAAGGTCTATA---TGTTAATTCATAATATATTTTT--------ATATTCGATCATAAATTAGTTTATAT	GCTGATGCTGGACATACACCTATATTATTGGAAGCTAGAGATGTTCTGGGGGGAAAGGTCTATATACTGTT-ATTCATAATA---TTTTCGAACACAATATTCGATCATAAATTAGTTTATAT	119	28	Ins	N/A
908	GCTGATGCTGGACATACACCTATATTATTGGAAGCTAGAGATGTTCTGGGAGGAAAGGTCTATATGTTAATTCATAATATATTTTTATATTCGATCATAAATTAGTTTATAT	GCTGATGCTGGGCATACACCTATATTATTGGAAGCTAGAGATGTTTTAGGAGGAAAGGTC----------TTCATAGTATATTTTTATATTTGATCATAAATTAGTTTATAT	102	28	del	N/A
909	GCTGATGCTGGACATACACCTATATTATTGGAAGCTAGAGATGTTCTGGGAGGAAAGGTCTATATGTTAATTCATAATATATTTTTATATTCGATCATAAATTAGTTTATAT	GCTGATGCTGGACATCCACCTATATTATTGGAAGCTAGAGATGTTTTAGGAGGAAATGTC----------TTCATAATATATTTTTATATTTGATCATAAATTAGTTTATAT	102	27	del	N/A
910	GCTGATGCTGGACATACACCTATATTATTGGAAGCTAGAGATGTTCTGGGAGGAAAGGTCTATATGTTAATTCATAATATATTTTTATATTCGATCATAAATTAGTTTATAT	GCTTATGCTGGACATACACCTATATTATTGGAAGCTAGAGATGTTTTAGGAGGAAAGGTC----------TTCATAATATATTTTTGTATTTGATCATAAATTAGTTTATAT	102	27	del	N/A
911	GCTGATGCTGGACATACACCTATATTATTGGAAGCTAGAGATGTTCTGGGAGGAAAGGTCTATATGTTAATTCATAATATATTTTTATATTCGATCATAAATTAGTTTATAT	GCTGATGCTGGATATACACCTATACTATTGGAAGCTAGAGATGTTTTAGGAGGAAAGGTC----------TTCATAATATGTTTTTATATTTGATCATAAATTAGTTTATAT	102	27	del	N/A
912	GCTGATGCTGGACATACACCTATATTATTGGAAGCTAGAGATGTTCTGGGAGGAAAGGTCTATA---TGTTAATTCATAATATATTTTT--------ATATTCGATCATAAATTAGTTTATAT	GCTGATGCTGGACATACACCTATATTATTGGAAGCTAGAGATGTTATGGGGGGAAAGGTCTATATACTGTT-ATTCATAATA---TTTTCGAACACAATATTTGATCATAAATTAGTTTATAT	119	27	Ins	N/A
913	#NAME?	GCTGATGCTGGACATACACCGCTGATGCTGGACATACACCTATATTATTGGAAGCTAGAGATGTTTTAGGAGGAAAGGTCTATATGTTAATTCATAATATATTTTTATATTCGATCATAAATTAGTTTATAT	132	27	Ins	N/A
914	GCTGATGCTGGACATACACCTATATTATTGGAAGCTAGAGATGTTCTGGGAGGAAAGGTCTATATGTTAATTCATAATATATTTTTATA-TTCGATCATAAATTAGTTTATAT	GCTGATGCTGGACATACACCTATATTATTGGAAGCTAGAGATGTTTTAGGAGGAAAGGTC----------TTCATAATATATTTTTATATTTTGATAATAAATTAGTTTATAT	103	27	del	N/A
915	GCTGATGCTGGACATACACCTATATTATTGGAAGCTAGAGATGTTCTGGGAGGAAAGGTCTATATGTTAATTCATAATATATTTTTATATTCGATCATAAATTAGTTTATAT	GCTGATGCTGGACATACACCTATATTATTGGAAGCTAGAGATGTTCTGGGAGGAAAGGTCTATAAGTTAATTCATAATATATTTTTATATTCGATCATAAATTAGTTTATAT	112	27	Sub	N/A
916	GCTGATGCTGGACATACACCTATATTATTGGAAGCTAGAGATGTTCTGGGAGGAAAGGT--------------------------------------------------------------CTAT-----------------ATGTT--------AA-----TTCATAATATATTTTTATATTCGATCATAAATTAGTTTATAT	GCTGATGCTGGACATACACCTATATTATTGGAAGCTAGAGATGTTCTGGGAGGAAAGGTTGCTGCTTGGAAAGACAAGGATGGGGATTGGTATGAAACAGGAGCTGATGCTGGACATACACCTATATTATTGGAAGCTAGAGATGTTTTAGGAGGAAATGTCTTCATAATACATTTTTATATTTGATCATAAATTAGTTTATAT	204	27	Ins	N/A
917	GCTGATGCTGGACATACACCTATATTATTGGAAGCTAGAGATGTTCTGGGAGGAAAGGTCTATATGTTAATTCATAATATATTTTTATATTCGATCATAAATTAGTTTATAT	GCTGATGCTGGACATACACCTATACTATTGGAAGCTAGAGATGTTTTAGGAGGAAAGGTC----------TTCATAATATATTTTTGTATTTGATCATAAATTAGTTTATAT	102	27	del	N/A
918	GCTGATGCTGGACATACACCTATATTATTGGAAGCTAGAGATGTTCTGGGAGGAAAGGTCTATATGTTAATTCATAATATATTTTTATATTCGATCATAAATTAGTTTATAT	GCTGATGCTGGACATACACCTATATTATTGGAAGCTAGAGATGTTTTAGGAGGAAATGTC----------TTCATACTACATTTTTATATTTGATCATAAATTAGTTTATAT	102	27	del	N/A
919	GCTGATGCTGGACATACACCTATATTATTGGAAGCTAGAGATGTTCTGGGAGGAAAGGTCTATATGTTAATTCATAATATATTTTTATATTCGATCATAAATTAGTTTATAT	GCTGATGCTGGACATACACCTATATTATTGGAAGCTAGAGATGTTTTAGGAGGAAATGTC----------TTTATAATATATTTTTATATTTGATCATAAATTAGTTTATAT	102	27	del	N/A
920	GCTGATGCTGGACATACACCTATATTATTGGAAGCTAGAGATGTTCTGGGAGGAAAGGTCTATATGTTAATTCATAATATATTTTTATATTCGATCATAAATTAGTTTATAT	GCTGATGCTGGACATACACCTATATTATNGGAAGCTNGAGATGTTTTAGGAGGAAATGTC----------TTCATAATACATTTTTATATTTGATCATAAATTAGTTTATAT	102	27	del	N/A
921	GCTGATGCTGGACATACACCTATATTATTGGAAGCTAGAGATGTTCTGGGAGGAAAGGTCTATATGTTAATTCATAATATATTTTTATATTCGATCATAAATTAGTTTATAT	GCTGATGCTGGACATACACCTATACTATTGGAAGCGAGAGATGTTTTAGGAGGAAAGGTC----------TTCATAATATGTTTTTATATTTGATCATAAATTAGTTTATAT	102	26	del	N/A
922	GCTGATGCTGGACATACACCTATATTATTGGAAGCTAGAGATGTTCTGGGAGGAAAGGTCTATATGTTAATTCATAATATATTTTTATATTCGATCATAAATTAGTTTATAT	GCTGATGCTGGACATACACCTATATTATTGGAAGCTAGAGATGTTTTAGGAGGAAAGGTC----------TTCATAATATCTTTTTATATTTGATCATAAATTAGTTTATAT	102	26	del	N/A
923	GCTGATGCTGGACATACACCTATATTATTGGAAGCTAGAGATGTTCTGGGAGGAAAGGTCTATA---TGTTAATTCATAATATATTTTT--------ATATTCGATCATAAATTAGTTTATAT	GCTGATGCTGGACATACACCTATATTATTGGAAGCTAGAGATGTTCTGTGGGGAAAGGTCTATATACTGTT-ATTCATAATA---TTTTCGAACACAATATTTGATCATAAATTAGTTTATAT	119	26	Ins	N/A
924	GCTGATGCTGGACATACACCTATATTATTGGAAGCTAGAGATGTTCTGGGAGGAAAGGTCTATA---TGTTAATTCATAATATATTTTT--------ATATTCGATCATAAATTAGTTTATAT	GCTGATGCTGGACATACACCTATATTATTGGAAACTAGAGATGTTCTGGGGGGAAAGGTCTATATACTGTT-ATTCATAATA---TTTTCGAACACAATATTTGATCATAAATTAGTTTATAT	119	26	Ins	N/A
925	GCTGATGCTGGACATACACCTATATTATTGGAAGCTAGAGATGTTCTGGGAGGAAAGGTCTATATGTTAATTCATAATATATTTTTATATTCGATCATAAATTAGTTTATAT	GCTGATGCTGGACATACACCTATATTATTGGAAGCTTGAGATGTTTTAGGAGGAAATGTC----------TTCATAATACATTTTTATATTTGATCATAAATTAGTTTATAT	102	26	del	N/A
926	GCTGATGCTGGACATACACCTATATTATTGGAAGCTAGAGATGTTCTGGGAGGAAAGGTCTATATGTTAATTCATAATATATTTTTATATTCGATCATAAATTAGTTTATAT	GCTGATGCTGGACATACACCTTTATTATTGGAAGCTAGAGATGTTCTGGGAGGAAAGGTCTATATGTTAATTCATAATATATTTTTATATTCGATCATAAATTAGTTTATAT	112	26	Sub	N/A
927	GCTGATGCTGGACATACACCTATATTATTGGAAGCTAGAGATGTTCTGGGAGGAAAGGTCTATATGTTAATTCATAATATATTTTTATATTCGATCATAAATTAGTTTATAT	GCTGATGCTGGACATACACCTATAATATTGGAAGCTAGAGATGTTTTAGGAGGAAATGTC----------TTCATAATACATTTTTATATTTGATCATAAATTAGTTTATAT	102	26	del	N/A
928	GCTGATGCTGGACATACACCTATATTATTGGAAGCTAGAGATGTTCTGGGAGGAAAGGTCTATATGTTAATTCATAATATATTTTTATATTCGATCATAAATTAGTTTATAT	GCTGATGCTGGACATACACCTATATTATTGGAAGCTAGAGATGTTCTGGGAGGAAAGGTCTATATGTTAATTCATAATATATTTTTATATTCGAGCATAAATTAGTTTATAT	112	26	Sub	N/A
929	GCTGATGCTGGACATACACCTATATTATTGGAAGCTAGAGATGTTCTGGGAGGAAAGGTCTATATGTTAATTCATAATATATTTTTATATTCGATCATAAATTAGTTTATAT	GCTGATGCTGGACATACACCTATATTATTCGAAGCTAGAGATGTTTTAGGAGGAAATGTC----------TTCATAATACATTTTTATATTTGATCATAAATTAGTTTATAT	102	26	del	N/A
930	GCTGATGCTGGACATACACCTATATTATTGGAAGCTAGAGATGTTCTGGGAGGAAAGGTCTATATGTTAATTCATAATATA-TTTTTATATTCGATCATAAATTAGTTTATAT	GCTGATGCTGGACATACACCTATATTATTGGAAGCTAGAGATGTTCTGGGAGGAAAGGTCTATATGTTAATTCATAATATATTTTTTATATTCGATCATAAATTAGTTTATAT	113	26	Ins	N/A
931	GCTGATGCTGGACATACACCTATATTATTGGAAGCTAGAGATGTTCTGGGAGGAAAGGTCTATATGTTAATTCATAATATATTTTTATA-TTCGATCATAAATTAGTTTATAT	GCTGATGCTGGACATACACCTATATTATTGGAGGCTAGAGATGTTTTAGGAGGAAAGGTC----------TTCATAATATATTTTTATATTTTGATCATAAATTAGTTTATAT	103	26	del	N/A
932	GCTGATGCTGGACATACACCTATATTATTGGAAGCTAGAGATGTTCTGGGAGGAAAGGTCTATATGTTAATTCATAATATATTTTTATATTCGATCATAAATTAGTTTATAT	GCTGATGCTGGACATACACCTATATTATTGGAAGCTAGAGATGTTCTGGGAGGAAAGGTGTATATGTTAATTCATAATATATTTTTATATTCGATCATAAATTAGTTTATAT	112	26	Sub	N/A
933	GCTGATGCTGGACATACACCTATATTATTGGAAGCTAGAGATGTTCTGGGAGGAAAGGTCTATATGTTAATTCATAATATATTTTTATATTCGATCATAAATTAGTTTATAT	GCTGATGCTGGACATACACCTATATTATTGGAAGCTAGAGATGTTTTAGGAGGAAATGTC----------TTCATAATACATTTTTATATTTGATCATAAATTAATTTATAT	102	26	del	N/A
934	GCTGATGCTGGACATACACCTATATTATTGGAAGCTAGAGATGTTCTGGGAGGAAAGGTCTATATGTTAATTCATAATATATTTTTATATTCGATCATAAATTAGTTTATAT	GCTGATGCTGGACATACACCTATATTTTTGGAAGCTAGAGATGTTCTGGGAGGAAAGGTCTATATGTTAATTCATAATATATTTTTATATTCGATCATAAATTAGTTTATAT	112	26	Sub	N/A
935	GCTGATGCTGGACATACACCTATATTATTGGAAGCTAGAGATGTTCTGGGAGGAAAGGTCTATA---TGTTAATTCATAATATATTTTT--------ATATTCGATCATAAATTAGTTTATAT	GCTGATGCTGGACATATACCTATATTATTGGAAGCTAGAGATGTTCTGGGGGGAAAGGTCTATATACTGTT-ATTCATAATA---TTTTCGAACACAATATTTGATCATAAATTAGTTTATAT	119	26	Ins	N/A
936	GCTGATGCTGGACATACACCTATATTATTGGAAGCTAGAGATGTTCTGGGAGGAAAGGTCTATA---TGTTAATTCATAATATATTTTT--------ATATTCGATCATAAATTAGTTTATAT	GCTGATGCTGGACATACACCTATATTATTGGAAGATAGAGATGTTCTGGGGGGAAAGGTCTATATACTGTT-ATTCATAATA---TTTTCGAACACAATATTTGATCATAAATTAGTTTATAT	119	26	Ins	N/A
937	GCTGATGCTGGACATACACCTATATTATTGGAAGCTAGAGATGTTCTGGGAGGAAAGGTCTATATGTTAATTCATAATATATTTTTATATTCGATCATAAATTAGTTTATAT	GCTGTTGCTGGACATACACCTATATTATTGGAAGCTAGAGATGTTCTGGGAGGAAAGGTCTATATGTTAATTCATAATATATTTTTATATTCGATCATAAATTAGTTTATAT	112	26	Sub	N/A
938	GCTGATGCTGGACATACACCTATATTATTGGAAGCTAGAGATGTTCTGGGAGGAAAGGTCTATATGTTAATTCATAATATATTTTTATATTCGATCATAAATTAGTTTATAT	GCTGATGCTGGACATACACCTATATTATTGGAAGCTAGAGATGTTTTAGGAGGAAAGGTC----------TTCATAATATATTTTTATATTGGATCATAAATTAGTTTATAT	102	26	del	N/A
939	GCTGATGCTGGACATACACCTATATTATTGGAAGCTAGAGATGTTCTGGGAGGAAAGGTCTATATGTTAATTCATAATATATTTTTATATTCGATCATAAATTAGTTTATAT	GCTGATGCTGGACATACACCGATATTATTGGAAGCTAGAGATGTTCTGGGAGGAAAGGTCTATATGTTAATTCATAATATATTTTTATATTCGATCATAAATTAGTTTATAT	112	26	Sub	N/A
940	GCTGATGCTGGACATACACCTATATTATTGGAAGCTAGAGATGTTCTGGGAGGAAAGGTCTATATGTTAATTCATAATATATTTTTATATTCGATCATAAATTAGTTTATAT	GCTGATGCTGGACATACACCTATATTATTGGAAGCTAGAGATGTTTTAGGACGAAATGTC----------TTCATAATACATTTTTATATTTGATCATAAATTAGTTTATAT	102	26	del	N/A
941	GCTGATGCTGGACATACACCTATATTATTGGAAGCTAGAGATGTTCTGGGAGGAAAGGTCTATA---TGTTAATTCATAATATATTTTT--------ATATTCGATCATAAATTAGTTTATAT	GATGATGCTGGACATACACCTATATTATTGGAAGCTAGAGATGTTCTGGGGGGAAAGGTCTATATACTGTT-ATTCATAATA---TTTTCGAACACAATATTTGATCATAAATTAGTTTATAT	119	26	Ins	N/A
942	GCTGATGCTGGACATACACCTATATTATTGGAAGCTAGAGATGTTCTGGGAGGAAAGGTCTATATGTTAATTCATAATATATTTTTATATTCGATCATAAATTAGTTTATAT	GCTGATGCTGGACATACACCTATATTATTGGAAGCTAGAGATGTTCTGGGAGGAAAGGTCTATATGTTAATTCATAATATATTTTTATCTTCGATCATAAATTAGTTTATAT	112	26	Sub	N/A
943	GCTGATGCTGGACATACACCTATATTATTGGAAGCTAGAGATGTTCTGGGAGGAAAGGTCTATATGTTAATTCATAATATATTTTTATATTCGATCATAAATTAGTTTATAT	GCTGATGCTGGACATACACCTATATTATTGGAAGNTAGAGATGTTTTAGGAGGAAAGGTC----------TTCATAATATATTTTTATATTTGATCATAAATTAGTTTATAT	102	26	del	N/A
944	GCTGATGCTGGACATACACCTATATTATTGGAAGCTAGAGATGTTCTGGGAGGAAAGGTCTATATGTTAATTCATAATATATTTTTATA-TTCGATCATAAATTAGTTTATAT	GGTGATGCTGGACATACACCTATATTATTGGAAGCTAGAGATGTTTTAGGAGGAAAGGTC----------TTCATAATATATTTTTATATTTTGATCATAAATTAGTTTATAT	103	26	del	N/A
945	GCTGATGCTGGACATACACCTATATTATTGGAAGCTAGAGATGTTCTGGGAGGAAAGGTCTATATGTTAATTCATAATATATTTTTATATTCGATCATAAATTAGTTTATAT	GCTGATGCTGGACATACACCTATATTAGTGGATGCTAGAGATGTTTTAGGAGGAAATGTC----------TTCATAATACATTTTTATATTTGATCATAAATTAGTTTATAT	102	26	del	N/A
946	GCTGATGCTGGACATACACCTATATTATTGGAAGCTAGAGATGTTCTGGGAGGAAAGGTCTATATGTTAATTCATAATATATTTTTATATTCGATCATAAATTAGTTTATAT	GCTGATGCTGGACATACACCTATATTATTGGAAGCTAGAGATGTTTTAGGAGGAAATGTC----------TTAATAATACATTTTTATATTTGATCATAAATTAGTTTATAT	102	25	del	N/A
947	GCTGATGCTGGACATACACCTATATTATTGGAAGCTAGAGATGTTCTGGGAGGAAAGGTCTATATGTTAATTCATAATATATTTTTATATTCGATCATAAATTAGTTTATAT	GCTGATGCTGGACATACACCTATATTATTGGAAGCTAGAGATGTTCTGGGAGGAAAGGTCTATATGTTAATTCATAATATATTTTTATATACGATCATAAATTAGTTTATAT	112	25	Sub	N/A
948	GCTGATGCTGGACATACACCTATATTATTGGAAGCTAGAGATGTTCTGGGAGGAAAGGTCTATA---TGTTAATTCATAATATATTTTT--------ATATTCGATCATAAATTAGTTTATAT	GCTGATGCTTGACATACACCTATATTATTGGAAGCTAGAGATGTTCTGGGGGGAAAGGTCTATATACTGTT-ATTCATAATA---TTTTCGAACACAATATTTGATCATAAATTAGTTTATAT	119	25	Ins	N/A
949	GCTGATGCTGGACATACACCTATATTATTGGAAGCTAGAGATGTTCTGGGAGGAAAGGTCTATATGTTAATTCATAATATATTTTTATATTCGATCATAAATTAGTTTATAT	GCTGATGCTGGACATACACCTATATTATTGGAAGCTAGAGATGTTCTGGGAGGAAAGGTCTATATGTTAATTCATAATATATTTTTTTATTCGATCATAAATTAGTTTATAT	112	25	Sub	N/A
950	GCTGATGCTGGACATACACCTATATTATTGGAAGCTAGAGATGTTCTGGGAGGAAAGGTCTATATGTTAATTCATAATATATTTTTATATTCGATCATAAATTAGTTTATAT	GCTGATGCTGGACATACACCTATATTATTGGAAGCTAGAGATGTTCTGGGCGGAAAGGTCTATATGTTAATTCATAATATATTTTTATATTCGATCATAAATTAGTTTATAT	112	25	Sub	N/A
951	GCTGATGCTGGACATACACCTATATTATTGGAAGCTAGAGATGTTCTGGGAGGAAAGGTCTATA---TGTTAATTCATAATATATTTTT--------ATATTCGATCATAAATTAGTTTATAT	GCTGATGCTGGACATACCCCTATATTATTGGAAGCTAGAGATGTTCTGGGGGGAAAGGTCTATATACTGTT-ATTCATAATA---TTTTCGAACACAATATTTGATCATAAATTAGTTTATAT	119	25	Ins	N/A
952	GCTGATGCTGGACATACACCTATATTATTGGAAGCTAGAGATGTTCTGGGAGGAAAGGTCTATATGTTAATTCATAATATATTTTTATATTCGATCATAAATTAGTTTATAT	GCTGATGCTGGACATACACCTAAATTATTGGAAGCTAGAGATGTTCTGGGAGGAAAGGTCTATATGTTAATTCATAATATATTTTTATATTCGATCATAAATTAGTTTATAT	112	25	Sub	N/A
953	GCTGATGCTGGACATACACCTATATTATTGGAAGCTAGAGATGTTCTGGGAGGAAAGGTCTATATGTTAATTCATAATATATTTTTATA-TTCGATCATAAATTAGTTTATAT	GCTGATGCTGGACATACACCTATATTATTGGAAGCTAGGGATGTTTTAGGAGGAAAGGTC----------TTCATAATATATTTTTATATTTTGATCATAAATTAGTTTATAT	103	25	del	N/A
954	GCTGATGCTGGACATACACCTATATTATTGGAAGCTAGAGATGTTCTGGGAGGAAAGGTCTATA---TGTTAATTCATAATATATTTTT--------ATATTCGATCATAAATTAGTTTATAT	GCTGATGCTGGACATACACCTATCTTATTGGAAGCTAGAGATGTTCTGGGGGGAAAGGTCTATATACTGTT-ATTCATAATA---TTTTCGAACACAATATTTGATCATAAATTAGTTTATAT	119	25	Ins	N/A
955	GCTGATGCTGGACATACACCTATATTATTGGAAGCTAGAGATGTTCTGGGAGGAAAGGTCTATATGTTAATTCATAATATATTTTTATATTCGATCATAAATTAGTTTATAT	GCTGATGCTGTACATACACCTATATTATTGGAAGCTAGAGATGTTTTAGGAGGAAATGTC----------TTCATAATATATTTTTATATTTGATCATAAATTAGTTTATAT	102	25	del	N/A
956	GCTGATGCTGGACATACACCTATATTATTGGAAGCTAGAGATGTTCTGGGAGGAAAGGTCTATATGTTAATTCATAATATATTTTTATATTCGATCATAAATTAGTTTATAT	GCTGATGCTGGACATACACCTATATTATTGGGAGCTAGAGATGTTTTAGGAGGAAATGTC----------TTCATAATATATTTTTATATTTGATCATAAATTAGTTTATAT	102	25	del	N/A
957	GCTGATGCTGGACATACACCTATATTATTGGAAGCTAGAGATGTTCTGGGAGGAAAGGTCTATA---TGTTAATTCATAATATATTTTT--------ATATTCGATCATAAATTAGTTTATAT	GCTGATGCTGGACATACACCTATATTATTGGAAGCTAGAGATGTCCTGGGGGGAAAGGTCTATATACTGTT-ATTCATAATA---TTTTCGAACACAATATTTGATCATAAATTAGTTTATAT	119	25	Ins	N/A
958	GCTGATGCTGGACATACACCTATATTATTGGAAGCTAGAGATGTTCTGGGAGGAAAGGTCTATA---TGTTAATTCATAATATATTTTT--------ATATTCGATCATAAATTAGTTTATAT	GCTGATGCTGGACATACACCTATATTATTGGAAGCTAGAGATGTTCTGGGTGGAAAGGTCTATATACTGTT-ATTCATAATA---TTTTCGAACACAATATTTGATCATAAATTAGTTTATAT	119	25	Ins	N/A
959	GCTGATGCTGGACATACACCTATATTATTGGAAGCTAGAGATGTTCTGGGAGGAAAGGTCTATATGTTAATTCATAATATATTTTTATATTCGATCATAAATTAGTTTATAT	GCTGATGCTGGACATACACCTATATTATTGGAAGCTAGAGATGTTTTAGGAGGAAAGGTC----------TTCATAAGATATTTTTATATTTGATCATAAATTAGTTTATAT	102	25	del	N/A
960	GCTGATGCTGGACATACACCTATATTATTGGAAGCTAGAGATGTTCTGGGAGGAAAGGTCTATATGTTAATTCATAATATATTTTTATATTCGATCATAAATTAGTTTATAT	GCTGATGCTGGACATACACCTATATTATTGGAAGCTAGAGATGTTTTAGGAGGAATGGTC----------TTCATAATATATTTTTATATTTGATCATAAATTAGTTTATAT	102	25	del	N/A
961	GCTGATGCTGGACATACACCTATATTATTGGAAGCTAGAGATGTTCTGGGAGGAAAGGTCTATATGTTAATTCATAATATATTTTTATATTCGATCATAAATTAGTTTATAT	GCTGATGCTGGACATACACCTATATTATTGGAAGCTAGAGATGTTCTGGGGGGAAATGTC----------TTCATAATACATTTTTATATTTGATCATAAATTAGTTTATAT	102	25	del	N/A
962	GCTGATGCTGGACATACACCTATATTATTGGAAGCTAGAGATGTTCTGGGAGGAAAGGTCTATATGTTAATTCATAATATATTTTTATATTCGATCATAAATTAGTTTATAT	GCTGATGCTGGACATACACCTATATTATTGGAAGCTAGAGATGTTCTGGGAGGAAAGGTCGATATGTTAATTCATAATATATTTTTATATTCGATCATAAATTAGTTTATAT	112	25	Sub	N/A
963	GCTGATGCTGGACATACACCTATATTATTGGAAGCTAGAGATGTTCTGGGAGGAAAGGTCTATATGTTAATTCATAATATATTTTTATATTCGATCATAAATTAGTTTATAT	GCTGATGCTGGACATACACCTATATTATTGGAAGCTAGAGATGTTCTGGGAGGAAAGGTCTATATGTTAATTCATAATATATTTTTATATGCGATCATAAATTAGTTTATAT	112	25	Sub	N/A
964	GCTGATGCTGGACATACACCTATATTATTGGAAGCTAGAGATGTTCTGGGAGGAAAGGTCTATATGTTAATTCATAATATATTTTTATATTCGATCATAAATTAGTTTATAT	GCTGATGCTGGACATACACCTATACTAGTGGAAGCTAGAGATGTTTTAGGAGGAAAGGTC----------TTCATAATATGTTTTTATATTTGATCATAAATTAGTTTATAT	102	25	del	N/A
965	GCTGATGCTGGACATACACCTATATTATTGGAAGCTAGAGATGTTCTGGGAGGAAAGGTCTATATGTTAATTCATAATATATTTTTATATTCGATCATAAATTAGTTTATAT	GGTGATGCTGGACATACAGCTATATTATTGGAAGCTAGAGATGTTTTAGGAGGAAATGTC----------TTCATAATACATTTTTATATTTGATCATAAATTAGTTTATAT	102	25	del	N/A
966	GCTGATGCTGGACATACACCTATATTATTGGAAGCTAGAGATGTTCTGGGAGGAAAGGTCTATATGTTAATTCATAATATATTTTTATATTCGATCATAAATTAGTTTATAT	GCTGATGCTGGACATACACCTATACTACTGGAAGCTAGAGATGTTTTAGGAGGAAAGGTC----------TTCATAATATGTTTTTATATTTGATCATAAATTAGTTTATAT	102	24	del	N/A
967	GCTGATGCTGGACATACACCTATATTATTGGAAGCTAGAGATGTTCTGGGAGGAAAGGTCTATA---TGTTAATTCATAATATATTTTT--------ATATTCGATCATAAATTAGTTTATAT	GCTGATGCTGGACCTACACCTATATTATTGGAAGCTAGAGATGTTCTGGGGGGAAAGGTCTATATACTGTT-ATTCATAATA---TTTTCGAACACAATATTTGATCATAAATTAGTTTATAT	119	24	Ins	N/A
968	GCTGATGCTGGACATACACCTATATTATTGGAAGCTAGAGATGTTCTGGGAGGAAAGGTCTATATGTTAATTCATAATATATTTTTATATTCGATCATAAATTAGTTTATAT	GCTGATGCTGGACATACACCTATATTATTGGAAGCTAGAGATGTTCTGGGAGGAAAGGTCTATATGTTAATTCATTATATATTTTTATATTCGATCATAAATTAGTTTATAT	112	24	Sub	N/A
969	GCTGATGCTGGACATACACCTATATTATTGGAAGCTAGAGATGTTCTGGGAGGAAAGGTCTATATGTTAATTCATAATATATTTTTATATTCGATCATAAATTAGTTTATAT	GCTGATGCTGGACATACACCTATATTATTGGAAGCTTGAGATGTTTTAGGAGGAAAGGTC----------TTCATAATATATTTTTATATTTGATCATAAATTAGTTTATAT	102	24	del	N/A
970	GCTGATGCTGGACATACACCTATATTATTGGAAGCTAGAGATGTTCTGGGAGGAAAGGTCTATATGTTAATTCATAATATATTTTTATATTCGATCATAAATTAGTTTATAT	GCTGATGCTGGACATACACCTATATTATTGGAAGCTAGAGATGTTTTAGGAGGAAAGGTCTATATGTTAGTTCATAATATATTTTTGTATTCGATCATAAATTAGTTTATAT	112	24	Sub	N/A
971	GCTGATGCTGGACATACACCTATATTATTGGAAGCTAGAGATGTTCTGGGAGGAAAGGTCTATATGTTAATTCATAATATATTTTTATATTCGATCATAAATTAGTTTATAT	GCTGCTGCTGGACATACACCTATATTATTGGAAGCTAGAGATGTTTTAGGAGGAAATGTC----------TTCATAATATATTTTTATATTTGATCATAAATTAGTTTATAT	102	24	del	N/A
972	GCTGATGCTGGACATACACCTATATTATTGGAAGCTAGAGATGTTCTGGGAGGAAAGGTCTATATGTTAATTCATAATATATTTTTATA-TTCGATCATAAATTAGTTTATAT	GCTGCTGCTGGACATACACCTATATTATTGGAAGCTAGAGATGTTTTAGGAGGAAAGGTC----------TTCATAATATATTTTTATATTTTGATCATAAATTAGTTTATAT	103	24	del	N/A
973	GCTGATGCTGGACATACACCTATATTATTGGAAGCTAGAGATGTTCTGGGAGGAAAGGTCTATA---TGTTAATTCATAATATATTTTT--------ATATTCGATCATAAATTAGTTTATAT	GCTGATGCTGGACATACACCTATATTATTGGAAGCTAGAGATGTTCTGGTGGGAAAGGTCTATATACTGTT-ATTCATAATA---TTTTCGAACACAATATTTGATCATAAATTAGTTTATAT	119	24	Ins	N/A
974	GCTGATGCTGGACATACACCTATATTATTGGAAGCTAGAGATGTTCTGGGAGGAAAGGTCTATA---TGTTAATTCATAATATATTTTT--------ATATTCGATCATAAATTAGTTTATAT	GCTGATGCTGGACATACACCTATATTATTGGAAGCTAGAGATGTTCTGGGGGAAAAGGTCTATATACTGTT-ATTCATAATA---TTTTCGAACACAATATTTGATCATAAATTAGTTTATAT	119	24	Ins	N/A
975	GCTGATGCTGGACATACACCTATATTATTGGAAGCTAGAGATGTTCTGGGAGGAAAGGTCTATATGTTAATTCATAATATATTTTTATATTCGATCATAAATTAGTTTATAT	GCTGATGCTGGACATACACCTATATTATTGGAAGCTAGAGATGTTCTGGGAGGAAAGGTCTATATGTTAATTCATAATATATTTTTAAATTCGATCATAAATTAGTTTATAT	112	24	Sub	N/A
976	GCTGATGCTGGACATACACCTATATTATTGGAAGCTAGAGATGTTCTGGGAGGAAAGGTCTATATGTTAATTCATAATATATTTTTATATTCGATCATAAATTAGTTTATAT	GCTGATGCTGGACATACACCTATATTAATGGAAGCTAGAGATGTTTTAGGAGGAAATGTC----------TTCATAATATATTTTTATATTTGATCATAAATTAGTTTATAT	102	24	del	N/A
977	GCTGATGCTGGACATACACCTATATTATTGGAAGCTAGAGATGTTCTGGGAGGAAAGGTCTATATGTTAATTCATAATATATTTTTATATTCGATCATAAATTAGTTTATAT	GCTGATGCTGGACATACACCTATATTATTGGAAGCTAGAGATGTTTTAGGAGGAAATGTC----------TTCATAATAAATTTTTATATTTGATCATAAATTAGTTTATAT	102	24	del	N/A
978	GCTGATGCTGGACATACACCTATATTATTGGAAGCTAGAGATGTTCTGGGAGGAAAGGTCTATATGTTAATTCATAATATATTTTTATATTCGATCATAAATTAGTTTATAT	GCTGATGCTGGACATACACCTATATTATTGGAAGCTAGAGATGTTTTAGGTGGAAATGTC----------TTCATAATACATTTTTATATTTGATCATAAATTAGTTTATAT	102	24	del	N/A
979	GCTGATGCTGGACATACACCTATATTATTGGAAGCTAGAGATGTTCTGGGAGGAAAGGTCTATATGTTAATTCATAATATATTTTTATATTCGATCATAAATTAGTTTATAT	GCTGATGCTGGACAGACACCTATATTATTGGAAGCTAGAGATGTTTTAGGAGGAAATGTC----------TTCATAATACATTTTTATATTTGATCATAAATTAGTTTATAT	102	24	del	N/A
980	GCTGATGCTGGACATACACCTATATTATTGGAAGCTAGAGATGTTCTGGGAGGAAAGGTCTATATGTTAATTCATAATATATTTTTATATTCGATCATAAATTAGTTTATAT	GCTGATGCTGGACATACACCTATATTATTGGAAGCTAGAGATGTTTTAGGAGGAAAGGTC----------TTCATAATATATTTTTATATTTGATCATAAATTAGGTTATAT	102	24	del	N/A
981	GCTGATGCTGGACATACACCTATATTATTGGAAGCTAGAGATGTTCTGGGAGGAAAGGTCTATATGTTAATTCATAATATATTTTTATATTCGATCATAAATTAGTTTATAT	GCTGATGCTGGACTTACACCTATATTATTGGAAGCTAGAGATGTTTTAGGAGGAAAGGTC----------TTCATAATATATTTTTGTATTTGATCATAAATTAGTTTATAT	102	24	del	N/A
982	GCTGATGCTGGACATACACCTATATTATTGGAAGCTAGAGATGTTCTGGGAGGAAAGGTCTATA---TGTTAATTCATAATATATTTTT--------ATATTCGATCATAAATTAGTTTATAT	GCTGATGCTGGACATACACCTATATTATTGGAAGCTAGAGGTGTTCTGGGGGGAAAGGTCTATATACTGTT-ATTCATAATA---TTTTCGAACACAATATTTGATCATAAATTAGTTTATAT	119	24	Ins	N/A
983	GCTGATGCTGGACATACACCTATATTATTGGAAGCTAGAGATGTTCTGGGAGGAAAGGTCTATATGTTAATTCATAATATATTTTTATATTCGATCATAAATTAGTTTATAT	GCTGATGCTGGACATACACCTATATTATTGGAAGCTAGAGATGTTTTAGGAGGAAAGGTC----------TTCATTATATATTTTTATATTTGATCATAAATTAGTTTATAT	102	24	del	N/A
984	GCTGATGCTGGACATACACCTATATTATTGGAAGCTAGAGATGTTCTGGGAGGAAAGGTCTATATGTTAATTCATAATATATTTTTATATTCGATCATAAATTAGTTTATAT	GCTGATGCTGGACATACACCTATATTATTGGAAGCTAGAGATGTTCTGGGAGGAAAGGTCTATATGTTAATTCATAATATATTTTTATATTCGATCATAAATTAGTTTATCT	112	23	Sub	N/A
985	GCTGATGCTGGACATACACCTATATTATTGGAAGCTAGAGATGTTCTGGGAGGAAAGGTCTATATGTTAATTCATAATATATTTTTATATTCGATCATAAATTAGTTTATAT	GCTGATGCTGGACATACACCTATATTATTGGAAGCTAGAGATGTTTTAGGAGGAAATGTC----------TTCATAATACATTTTTATCTTTGATCATAAATTAGTTTATAT	102	23	del	N/A
986	GCTGATGCTGGACATACACCTATATTATTGGAAGCTAGAGATGTTCTGGGAGGAAAGGTCTATATGTTAATTCATAATATATTTTTATATTCGATCATAAATTAGTTTATAT	GCTGATGCTGGACATACACCTATATTATTGGAAGCTCGAGATGTTTTAGGAGGAAATGTC----------TTCATAATATATTTTTATATTTGATCATAAATTAGTTTATAT	102	23	del	N/A
987	GCTGATGCTGGACATACACCTATATTATTGGAAGCTAGAGATGTTCTGGGAGGAAAGGTCTATA---TGTTAATTCATAATATATTTTT--------ATATTCGATCATAAATTAGTTTATAT	GCTGATGCTGGACATACACCTATATTATTGTAAGCTAGAGATGTTCTGGGGGGAAAGGTCTATATACTGTT-ATTCATAATA---TTTTCGAACACAATATTTGATCATAAATTAGTTTATAT	119	23	Ins	N/A
988	GCTGATGCTGGACATACACCTATATTATTGGAAGCTAGAGATGTTCTGGGAGGAAAGGTCTATATGTTAATTCATAATATATTTTTATATTCGATCATAAATTAGTTTATAT	GCTGAGGCTGGACATACACCTATACTATTGGAAGCTAGAGATGTTTTAGGAGGAAAGGTC----------TTCATAATATGTTTTTATATTTGATCATAAATTAGTTTATAT	102	23	del	N/A
989	GCTGATGCTGGACATACACCTATATTATTGGAAGCTAGAGATGTTCTGGGAGGAAAGGTCTATATGTTAATTCATAATATATTTTTATATTCGATCATAAATTAGTTTATAT	GCTGATGCTGGACATACACCTATATTATTGGCAGCTAGAGATGTTTTAGGAGGAAAGGTC----------TTCATAATATATTTTTGTATTTGATCATAAATTAGTTTATAT	102	23	del	N/A
990	GCTGATGCTGGACATACACCTATATTATTGGAAGCTAGAGATGTTCTGGGAGGAAAGGTCTATATGTTAATTCATAATATATTTTTATATTCGATCATAAATTAGTTTATAT	GCGGATGCTGGACATACACCTATATTATTGGAAGCGAGAGATGTTTTAGGAGGAAAGGTC----------TTCATAATATATTTTTATATTTGATCATAAATTAGTTTATAT	102	23	del	N/A
991	GCTGATGCTGGACATACACCTATATTATTGGAAGCTAGAGATGTTCTGGGAGGAAAGGTCTATATGTTAATTCATAATATATTTTTATATTCGATCATAAATTAGTTTATAT	GCTGATGCTGGACATACACCTATATTATTGGAAGTTAAAGATGTTCTAGAAGGAAAGGTCTATATGTTAATTCATAATATATTTTTATATTCGATCATAAATTAGTTTATAT	112	23	Sub	N/A
992	GCTGATGCTGGACATACACCTATATTATTGGAAGCTAGAGATGTTCTGGGAGGAAAGGTCTATATGTTAATTCATAATATATTTTTATATTCGATCATAAATTAGTTTATAT	GCTGATGCTGGACATACACCTATATTATTGGAAGCTAGAGATGTTTTAGGAGGAAAGGTC----------TTCATAATATATTTTTATATTTGATCATAACTTAGTTTATAT	102	23	del	N/A
993	GCTGATGCTGGACATACACCTATATTATTGGAAGCTAGAGATGTTCTGGGAGGAAAGGTCTATATGTTAATTCATAATATATTTTTATATTCGATCATAAATTAGTTTATAT	GCTGATGCTGGACTTACACCTATATTATTGGAAGCTAGAGATGTTTTAGGAGGAAAGGTC----------TTCATAATACATTTTTATATTTGATCATAAATTAGTTTATAT	102	23	del	N/A
994	GCTGATGCTGGACATACACCTATATTATTGGAAGCTAGAGATGTTCTGGGAGGAAAGGTCTATATGTTAATTCATAATATATTTTTATATTCGATCATAAATTAGTTTATAT	GCGGATGCTGGACATACACCTATACTATTGGAAGCTAGAGATGTTTTAGGAGGAAAGGTC----------TTCATAATATGTTTTTATATTTGATCATAAATTAGTTTATAT	102	23	del	N/A
995	GCTGATGCTGGACATACACCTATATTATTGGAAGCTAGAGATGTTCTGGGAGGAAAGGTCTATATGTTAATTCATAATATATTTTTATATTCGATCATAAATTAGTTTATAT	GCTGATGCTGGACATACACCTATATTATTGGAAGCTAGAGATGTTCTGGGAGGAAAGCTCTATATGTTAATTCATAATATATTTTTATATTCGATCATAAATTAGTTTATAT	112	23	Sub	N/A
996	GCTGATGCTGGACATACACCTATATTATTGGAAGCTAGAGATGTTCTGGGAGGAAAGGTCTATATGTTAATTCATAATATATTTTTATATTCGATCATAAATTAGTTTATAT	GCTGATGCTGGACATACACCTATATTATTGGAAGCTAGAGATGTTCTGGGAGGAAACGTCTATATGTTAATTCATAATATATTTTTATATTCGATCATAAATTAGTTTATAT	112	23	Sub	N/A
997	GCTGATGCTGGACATACACCTATATTATTGGAAGCTAGAGATGTTCTGGGAGGAAAGGTCTATA---TGTTAATTCATAATATATTTTT--------ATATTCGATCATAAATTAGTTTATAT	GCTGATGCTGGACATACACCTATATTATTAGAAGCTAGAGATGTTCTGGGGGGAAAGGTCTATATACTGTT-ATTCATAATA---TTTTCGAACACAATATTTGATCATAAATTAGTTTATAT	119	23	Ins	N/A
998	GCTGATGCTGGACATACACCTATATTATTGGAAGCTAGAGATGTTCTGGGAGGAAAGGTCTATATGTTAATTCATAATATATTTTTATA-TTCGATCATAAATTAGTTTATAT	GCTGATGCTGGTCATACACCTATATTATTGGAAGCTAGAGATGTTTTAGGAGGAAAGGTC----------TTCATAATATATTTTTATATTTTGATCATAAATTAGTTTATAT	103	23	del	N/A
999	GCTGATGCTGGACATACACCTATATTATTGGAAGCTAGAGATGTTCTGGGAGGAAAGGTCTATATGTTAATTCATAATATATTTTTATATTCGATCATAAATTAGTTTATAT	GCTGATGCTGGACATACACCTATATTATTGGAAGCTAGAGATGTTCTAGGAGGAAAGGTCTATATGTTAATTCATAATATATTTTTATATTTGATCATAAATTAGTTTATGT	112	23	Sub	N/A
1000	GCTGATGCTGGACATACACCTATATTATTGGAAGCTAGAGATGTTCTGGGAGGAAAGGTCTATATGTTAATTCATAATATATTTTTATATTCGATCATAAATTAGTTTATAT	GCTGATGCTGGACATACACCTATATTATTGGAAGCTAGAGATGTCCTGGGAGGAAAGGTCTATATGTTAATTCATAGTATATTTTTATATTCGATCATAAATTAGTTTATAT	112	23	Sub	N/A
1001	GCTGATGCTGGACATACACCTATATTATTGGAAGCTAGAGATGTTCTGGGAGGAAAGGTCTATATGTTAATTCATAATATATTTTTATATTCGATCATAAATTAGTTTATAT	GCTGATGCTGGACATACACCTATATTATTGGAAGCTAGAGATGTTCTGGGAGGAAAGGTCTATATGTTAATTCATAATATATTTTTATATTCGATCATAAATTAGTTAATAT	112	23	Sub	N/A
1002	GCTGATGCTGGACATACACCTATATTATTGGAAGCTAGAGATGTTCTGGGAGGAAAGGTCTATA---TGTTAATTCATAATATATTTTT--------ATATTCGATCATAAATTAGTTTATAT	GCTGATGCTGGACATACACCTATATTATTGGAAGCTAGAGATGTTCTGGGAGGAAAGGTCTATATGCTGTT-ATTCATAATA---TTTTCGAACACAATATTTGATCATAAATTAGTTTATAT	119	23	Ins	N/A
1003	GCTGATGCTGGACATACACCTATATTATTGGAAGCTAGAGATGTTCTGGGAGGAAAGGTCTATATGTTAATTCATAATATATTTTTATATTCGATCATAAATTAGTTTATAT	GCTGATGCTGGACATACACCTATATTATTGGAAGCTAGAGATGTTCTGGGAGGAAAGGTCTATATGTTAATACATAATATATTTTTATATTCGATCATAAATTAGTTTATAT	112	23	Sub	N/A
1004	GCTGATGCTGGACATACACCTATATTATTGGAAGCTAGAGATGTTCTGGGAGGAAAGGTCTATATGTTAATTCATAATATATTTTTATATTCGATCATAAATTAGTTTATAT	GCTGATGCTGGACATACACCTATATTATTGGAAGCTAGAGATGTTTTAGGAGG-AAGGTC----------TTCATAATATATTTTTATATTTGATCATAAATTAGTTTATAT	101	23	del	N/A
1005	GCTGATGCTGGACATACACCTATATTATTGGAAGCTAGAGATGTTCTGGGAGGAAAGGTCTATATGTTAATTCATAATATATTTTTATATTCGATCATAAATTAGTTTATAT	GCTGATGCTGGACATACACCTATATTATTGGAAGCTAGAGATGTTTTAGGAGGAAATGTCTATATGTTAATTCATAATATATTTTTATATTTGATCATAAATTAGTTTATAT	112	23	Sub	N/A
1006	GCTGATGCTGGACATACACCTATATTATTGGAAGCTAGAGATGTTCTGGGAGGAAAGGTCTATATGTTAATTCATAATATATTTTTATATTCGATCATAAATTAGTTTATAT	GCTGATGCTGGACATACACCTATATTATTGGAAGCTAGAGATGTTCTGGGAGGAAAGGTCTATATGTTAATTCATAATATATTTTTATATTCGATCATAAATTAGGTTATAT	112	23	Sub	N/A
1007	GCTGATGCTGGACATACACCTATATTATTGGAAGCTAGAGATGTTCTGGGAGGAAAGGTCTATATGTTAATTCATAATATATTTTTATATTCGATCATAAATTAGTTTATAT	GCTGATGCTGGACATACACCTATATTATTGGAAGCTAGAGCTGTTTTAGGAGGAAAGCTC----------TTCATAATATATTTTTATATTTGATCATAAATTAGTTTATAT	102	23	del	N/A
1008	GCTGATGCTGGACATACACCTATATTATTGGAAGCTAGAGATGTTCTGGGAGGAAAGGTCTATATGTTAATTCATAATATATTTTTATATTCGATCATAAATTAGTTTATAT	GCTGATGCTGGACATACACCTATATTATTGGAAGCTAGAGATGTTTTAGGAGGAAATGTC----------TTCATATTACATTTTTATATTTGATCATAAATTAGTTTATAT	102	22	del	N/A
1009	GCTGATGCTGGACATACACCTATATTATTGGAAGCTAGAGATGTTCTGGGAGGAAAGGTCTATATGTTAATTCATAATATATTTTTATATTCGATCATAAATTAGTTTATAT	GCTGATGCTGGACATACACCTATATTATTGGAAGCTAGAGATGTTTTAGGGGGAAATGTC----------TTCATAATATATTTTTATATTTGATCATAAATTAGTTTATAT	102	22	del	N/A
1010	GCTGATGCTGGACATACACCTATATTATTGGAAGCTAGAGATGTTCTGGGAGGAAAGGTCTATATGTTAATTCATAATATATTTTTATATTCGATCATAAATTAGTTTATAT	GCTGATGCTGGACATACACCTATATTATTGGAAGCTAGAGATGTTTTAGGAGGAAAGGTC----------TTCATAATATATTTTTATATTTGATCATAAATTAGTATATAT	102	22	del	N/A
1011	GCTGATGCTGGACATACACCTATATTATTGGAAGCTAGAGATGTTCTGGGAGGAAAGGTCTATA---TGTTAATTCATAATATATTTTT--------ATATTCGATCATAAATTAGTTTATAT	GCTGATGCTGGACATACACCCATATTATTGGAAGCTAGAGATGTTCTGGGGGGAAAGGTCTATATACTGTT-ATTCATAATA---TTTTCGAACACAATATTTGATCATAAATTAGTTTATAT	119	22	Ins	N/A
1012	GCTGATGCTGGACATACACCTATATTATTGGAAGCTAGAGATGTTCTGGGAGGAAAGGTCTATATGTTAATTCATAATATATTTTTATATTCGATCATAAATTAGTTTATAT	GCTGATGCTGGACATACACCTGTATTACTGGAAGCTAGAGATGTTCTGGGAGGAAAGGTCTATATGTTAATTCATAATATATTTTTATATTCGATCATAAATTAGTTTATAT	112	22	Sub	N/A
1013	GCTGATGCTGGACATACACCTATATTATTGGAAGCTAGAGATGTTCTGGGAGGAAAGGTCTATATGTTAATTCATAATATATTTTTATATTCGATCATAAATTAGTTTATAT	GCTGATGCTGGACATACACCTATATTATTGGAAGCTAGAGATGTTCTGGGAGGAAAGGTCTATATGTTAATTCATAATAGATTTTTATATTCGATCATAAATTAGTTTATAT	112	22	Sub	N/A
1014	GCTGATGCTGGACATACACCTATATTATTGGAAGCTAGAGATGTTCTGGGAGGAAAGGTCTATATGTTAATTCATAATATATTTTTATATTCGATCATAAATTAGTTTATAT	GCTGATGCTGGACATACACCTATATTATTGGAAGCTAGAGATGTTTTAGGAGGAAATGTC----------TTCATAATATATTTTTATATTTGATTATAAATTAGTTTATAT	102	22	del	N/A
1015	GCTGATGCTGGACATACACCTATATTATTGGAAGCTAGAGATGTTCTGGGAGGAAAGGTCTATATGTTAATTCATAATATATTTTTATATTCGATCATAAATTAGTTTATAT	GCTGATGCTGGACATACACCTATACTATTGGACGCTAGAGATGTTTTAGGAGGAAAGGTC----------TTCATAATATGTTTTTATATTTGATCATAAATTAGTTTATAT	102	22	del	N/A
1016	GCTGATGCTGGACATACACCTATATTATTGGAAGCTAGAGATGTTCTGGGAGGAAAGGTCTATATGTTAATTCATAATATATTTTTATATTCGATCATAAATTAGTTTATAT	GCTGATGCTGGACATACACCTATATTATTGGAAGCTAGAGATGTTTTAGGAGGAAAGGTC----------TTCATAATATATTTATATATTTGATCATAAATTAGTTTATAT	102	22	del	N/A
1017	GCTGATGCTGGACATACACCTATATTATTGGAAGCTAGAGATGTTCTGGGAGGAAAGGTCTATATGTTAATTCATAATATATTTTTATATTCGATCATAAATTAGTTTATAT	GCTGATGCTGGACATACACCTATATTATTGGAAGCTAGAGATGTTTTAGGAGGAAATGTC----------TTCATAATACATTTTTATAGTTGATCATAAATTAGTTTATAT	102	22	del	N/A
1018	GCTGATGCTGGACATACACCTATATTATTGGAAGCTAGAGATGTTCTGGGAGGAAAGGTCTATA---TGTTAATTCATAATATATTTTT--------ATATTCGATCATAAATTAGTTTATAT	GCTGATGCTGGACATACACCTATATTATTGGAAGCTAGAGATGTTCTGGGGGGAAAGGTCTATATACTGTT-ATTCATAATA---TTTTCGAACACAATATTTTATCATAAATTAGTTTATAT	119	22	Ins	N/A
1019	GCTGATGCTGGACATACACCTATATTATTGGAAGCTAGAGATGTTCTGGGAGGAAAGGTCTATATGTTAATTCATAATATATTTTTATATTCGATCATAAATTAGTTTATAT	GCTGATGCTGGACATACACCTATATCATTGGAAGCTAGAGATGTTTTAGGAGGAAATGTC----------TTCATAATATATTTTTATATTTGATCATAAATTAGTTTATAT	102	22	del	N/A
1020	GCTGATGCTGGACATACACCTATATTATTGGAAGCTAGAGATGTTCTGGGAGGAAAGGTCTATATGTTAATTCATAATATATTTTTATATTCGATCATAAATTAGTTTATAT	GCTGATGCTGGACATACACCTATATGATTGGAAGCGAGAGATGTTTTAGGAGGAAATGTC----------TTCATAATACATTTTTATATTTGATCATAAATTAGTTTATAT	102	22	del	N/A
1021	GCTGATGCTGGACATACACCTATATTATTGGAAGCTAGAGATGTTCTGGGAGGAAAGGTCTATATGTTAATTCATAATATATTTTTATA-TTCGATCATAAATTAGTTTATAT	GCTGATGCTGGACATACACCTATACTATTGGAAGCTAGAGATGTTTTAGGAGGAAAGGTC----------TTCATAATATGTTTTTATATTTTGATCATAAATTAGTTTATAT	103	22	del	N/A
1022	GCTGATGCTGGACATACACCTATATTATTGGAAGCTAGAGATGTTCTGGGAGGAAAGGTCTATATGTTAATTCATAATATATTTTTATA-TTCGATCATAAATTAGTTTATAT	GCTCATGCTGGACATACACCTATATTATTGGAAGCTAGAGATGTTTTAGGAGGAAAGGTC----------TTCATAATATATTTTTATATTTTGATCATAAATTAGTTTATAT	103	22	del	N/A
1023	GCTGATGCTGGACATACACCTATATTATTGGAAGCTAGAGATGTTCTGGGAGGAAAGGTCTATATGTTAATTCATAATATATTTTTATATTCGATCATAAATTAGTTTATAT	GCTGATGCTGGACATACACCTATATTAGTGGATGCTAGAGATGTTTTAGGAGGAAAGGTC----------TTCATAATATATTTTTATATTTGATCATAAATTAGTTTATAT	102	22	del	N/A
1024	GCTGATGCTGGACATACACCTATATTATTGGAAGCTAGAGATGTTCTGGGAGGAAAGGTCTATATGTTAATTCATAATATATTTTTATATTCGATCATAAATTAGTTTATAT	GGTGATGCTGGACATACAACTATATTATTGGAAGCTAGAGATGTTTTAGGAGGAAAGGTC----------TTCATAATATATTTTTATATTTGATCATAAATTAGTTTATAT	102	22	del	N/A
1025	GCTGATGCTGGACATACACCTATATTATTGGAAGCTAGAGATGTTCTGGGAGGAAAGGTCTATATGTTAATTCATAATATATTTTTATATTCGATCATAAATTAGTTTATAT	GCTGACGCTGGACATACACCTATATGATTGGAAGCTAGAGATGTTTTAGGAGGAAAGGTC----------TTCATAATATATTTTTATATTTGATCATAAATTAGTTTATAT	102	22	del	N/A
1026	GCTGATGCTGGACATACACCTATATTATTGGAAGCTAGAGATGTTCTGGGAGGAAAGGTCTATATGTTAATTCATAATATATTTTTATATTCGATCATAAATTAGTTTATAT	GCTGATGCTGGACATACACCCATATTATTGGAAGCTAGAGATGTTTTAGGAGGAAATGTC----------TTCATAATATATTTTTATATTTGATCATAAATTAGTTTATAT	102	21	del	N/A
1027	GCTGATGCTGGACATACACCTATATTATTGGAAGCTAGAGATGTTCTGGGAGGAAAGGTCTATATGTTAATTCATAATATATTTTTATATTCGATCATAAATTAGTTTATAT	GCTGATGCTGGACATACACCTATATTATTGTAAGCTAGAGATGTTTTAGGAGGAAATGTC----------TTCATAATATATTTTTATATTTGATCATAAATTAGTTTATAT	102	21	del	N/A
1028	#NAME?	GCTGATGCTGGACATACACCGCTGATGCTGGACATACACCTATATTATTGGAAGCTAGAGATGTTCTGGGAGGAAAGGTCTATATGTTAATTCATAATATATTTTTATATTTGATCATAAATTAGTTTATAT	132	21	Ins	N/A
1029	GCTGATGCTGGACATACACCTATATTATTGGAAGCTAGAGATGTTCTGGGAGGAAAGGTCTATATGTTAATTCATAATATATTTTTATATTCGATCATAAATTAGTTTATAT	GCTGATGCTGGACATACACCTATATTATTGGAAGCTAGAGATGGGTTAGGAGGAAAGGTC----------TTCATAATATATTTTTATATTTGATCATAAATTAGTTTATAT	102	21	del	N/A
1030	GCTGATGCTGGACATACACCTATATTATTGGAAGCTAGAGATGTTCTGGGAGGAAAGGTCTATA---TGTTAATTCATAATATATTTTT--------ATATTCGATCATAAATTAGTTTATAT	GCTGATGCTGGACATACACCTATATTATTGGAAGCTAGAGATGTTCTGGGGGGAAAGGTCTATATACTGTT-ATTTATAATA---TTTTCGAACACAATATTTGATCATAAATTAGTTTATAT	119	21	Ins	N/A
1031	GCTGATGCTGGACATACACCTATATTATTGGAAGCTAGAGATGTTCTGGGAGGAAAGGTCTATATGTTAATTCATAATATATTTTTATATTCGATCATAAATTAGTTTATAT	GCTGATGCTGGACATACACCTATATTATTGGAAGCTAGAGATGTTCTAGGAGGAAATGTC----------TTCATAATATATTTTTATATTTGATCATAAATTAGTTTATAT	102	21	del	N/A
1032	GCTGATGCTGGACATACACCTATATTATTGGAAGCTAGAGATGTTCTGGGAGGAAAGGTCTATATGTTAATTCATAATATATTTTTATATTCGATCATAAATTAGTTTATAT	GCTGATGCTGGACATACACCTATATTATTGGAAGCTAGAGATGTTCTGGGAGGAAAGGTCTATATGTTAATTCATAATATGTTTTTATATTTGATCATAAATTAGTTTATAT	112	21	Sub	N/A
1033	GCTGATGCTGGACATACACCTATATTATTGGAAGCTAGAGATGTTCTGGGAGGAAAGGTCTATATGTTAATTCATAATATATTTTTATATTCGATCATAAATTAGTTTATAT	GCTGATGCTGGACATACACCTATATTATTGGAAGCTAGAGATGTTCTGGGAGGAAAGGTCTATATGTTAATTCAT-ATATATTTTTATATTCGATCATAAATTAGTTTATAT	111	21	del	N/A
1034	GCTGATGCTGGACATACACCTATATTATTGGAAGCTAGAGATGTTCTGGGAGGAAAGGTCTATATGTTAATTCATAATATATTTTTATATTCGATCATAAATTAGTTTATAT	GCTGATGCTGGACATACACCTATATTATTGGAAACTAGAGATGTTTTAGGAGGAAATGTC----------TTCATAATATATTTTTATATTTGATCATAAATTAGTTTATAT	102	21	del	N/A
1035	GCTGATGCTGGACATACACCTATATTATTGGAAGCTAGAGATGTTCTGGGAGGAAAGGTCTATA---TGTTAATTCATAATATATTTTT--------ATATTCGATCATAAATTAGTTTATAT	GCTGATGCTGGACATACACCTATATTATTGGAAGCTAGAGATGTTCTGGGGGGAAAGGTCTATATACTGTT-ATTCATAATA---TTTTCGAACACAATATTTGATTATAAATTAGTTTATAT	119	21	Ins	N/A
1036	GCTGATGCTGGACATACACCTATATTATTGGAAGCTAGAGATGTTCTGGGAGGAAAGGTCTATATGTTAATTCATAATATATTTTTATATTCGATCATAAATTAGTTTATAT	GCTGATGCTGGACATACACCTATATTATTAGAAGCTAAAGATGTTCTACGAGGAAAGGTCTATATGTTAATTCATAATATATTTTTATATTCGATCATAAATTAGTTTATAT	112	21	Sub	N/A
1037	GCTGATGCTGGACATACACCTATATTATTGGAAGCTAGAGATGTTCTGGGAGGAAAGGTCTATATGTTAATTCATAATATATTTTTATATTCGATCATAAATTAGTTTATAT	GCTGCTGCTGGACATACACCTATACTATTGGAAGCTAGAGATGTTTTAGGAGGAAAGGTC----------TTCATAATATGTTTTTATATTTGATCATAAATTAGTTTATAT	102	21	del	N/A
1038	GCTGATGCTGGACATACACCTATATTATTGGAAGCTAGAGATGTTCTGGGAGGAAAGGTCTATA---TGTTAATTCATAATATATTTTT--------ATATTCGATCATAAATTAGTTTATAT	GCTGATGCTGGACATACACCTATGTTATTGGAAGCTAGAGATGTTCTGGGGGGAAAGGTCTATATACTGTT-ATTCATAATA---TTTTCGAACACAATATTTGATCATAAATTAGTTTATAT	119	21	Ins	N/A
1039	GCTGATGCTGGACATACACCTATATTATTGGAAGCTAGAGATGTTCTGGGAGGAAAGGTCTATATGTTAATTCATAATATATTTTTATATTCGATCATAAATTAGTTTATAT	GCTGATGCTGGACATACACCTATAATATTGGAAGCTAGAGATGTTTTAGGAGGAAAGGTC----------TTCATAATATATTTTTATATTTGATCATAAATTAGTTTATAT	102	21	del	N/A
1040	GCTGATGCTGGACATACACCTATATTATTGGAAGCTAGAGATGTTCTGGGAGGAAAGGTCTATATGTTAATTCATAATATATTTTTATATTCGATCATAAATTAGTTTATAT	GCTGATGCTGGACATACACCTAGATTATTGGAAGCTAGAGATGTTTTAGGAGGAAAGGTC----------TTCATAATATATTTTTATATTTGATCATAAATTAGTTTATAT	102	21	del	N/A
1041	GCTGATGCTGGACATACACCTATATTATTGGAAGCTAGAGATGTTCTGGGAGGAAAGGTCTATATGTTAATTCATAATATATTTTTATATTCGATCATAAATTAGTTTATAT	GCTAATGCTGGACATACACCTATACTATTGGAAGCTAGAGATGTTTTAGGAGGAAAGGTC----------TTCATAATATGTTTTTATATTTGATCATAAATTAGTTTATAT	102	21	del	N/A
1042	GCTGATGCTGGACATACACCTATATTATTGGAAGCTAGAGATGTTCTGGGAGGAAAGGTCTATATGTTAATTCATAATATATTTTTATATTCGATCATAAATTAGTTTATAT	GCTGATGCTGGACATACACCTATATTAGTGGAAGCTAGAGATGTTTTAGGAGGAAAGGTC----------TTCATAATATATTTTTGTATTTGATCATAAATTAGTTTATAT	102	21	del	N/A
1043	GCTGATGCTGGACATACACCTATATTATTGGAAGCTAGAGATGTTCTGGGAGGAAAGGTCTATATGTTAATTCATAATATATTTTTATATTCGATCATAAATTAGTTTATAT	GCGGATGCTGGACATACACCTATATTAGTGGAAGCTAGAGATGTTTTAGGAGGAAATGTC----------TTCATAATACATTTTTATATTTGATCATAAATTAGTTTATAT	102	21	del	N/A
1044	GCTGATGCTGGACATACACCTATATTATTGGAAGCTAGAGATGTTCTGGGAGGAAAGGTCTATATGTTAATTCATAATATATTTTTATATTCGATCATAAATTAGTTTATAT	GCTGATGCTGGACCTACACCTATATTATTGGAAGCTAGAGATGTTTTAGGAGGAAATGTC----------TTCATAATATATTTTTATATTTGATCATAAATTAGTTTATAT	102	21	del	N/A
1045	GCTGATGCTGGACATACACCTATATTATTGGAAGCTAGAGATGTTCTGGGAGGAAAGGTCTATA---TGTTAATTCATAATATATTTTT--------ATATTCGATCATAAATTAGTTTATAT	GCTGATGCTGGACATACACCTATATTATTGGAAGCTAGAGATGTTGTGGGGGGAAAGGTCTATATACTGTT-ATTCATAATA---TTTTCGAACACAATATTTGATCATAAATTAGTTTATAT	119	21	Ins	N/A
1046	GCTGATGCTGGACATACACCTATATTATTGGAAGCTAGAGATGTTCTGGGAGGAAAGGTCTATATGTTAATTCATAATATATTTTTATATTCGATCATAAATTAGTTTATAT	GCTGATGCTGGACATACACCTATATTACTGGAGGCTAGAGATGTTCTGGGAGGAAAGGTCTATATGTTAATTCATAATATATTTTTATATTCGATCATAAATTAGTTTATAT	112	21	Sub	N/A
1047	GCTGATGCTGGACATACACCTATATTATTGGAAGCTAGAGATGTTCTGGGAGGAAAGGTCTATATGTTAATTCATAATATATTTTTATATTCGATCATAAATTAGTTTATAT	GGTGATGCTGGACATACAACTATATTATTGGAAGCTAGAGATGTTCTGGGAGGAAAGGTCTATATGTTAATTCATAATATATTTTTATATTCGATCATAAATTAGTTTATAT	112	21	Sub	N/A
1048	GCTGATGCTGGACATACACCTATATTATTGGAAGCTAGAGATGTTCTGGGAGGAAAGGTCTATATGTTAATTCATAATATATTTTTATATTCGATCATAAATTAGTTTATAT	GCTGATGCTGGACATACACCTATATTATTGGACGCTAGAGCTGTTCTGGGAGGAAAGGTCTATATGTTAATTCATAATATATTTTTATATTCGATCATAAATTAGTTTATAT	112	20	Sub	N/A
1049	GCTGATGCTGGACATACACCTATATTATTGGAAGCTAGAGATGTTCTGGGAGGAAAGGTCTATATGTTAATTCATAATATATTTTTATATTCGATCATAAATTAGTTTATAT	GCTGATGCTGGACATACACCTATATTATTGGAAGCTAGAGATGTTTTAGGAGGAAAGGTC----------TTCATAATATATTTTTATATTTGATCCTAAATTAGTTTATAT	102	20	del	N/A
1050	GCTGATGCTGGACATACACCTATATTATTGGAAGCTAGAGATGTTCTGGGAGGAAAGGTCTATA---TGTTAATTCATAATATATTTTT--------ATATTCGATCATAAATTAGTTTATAT	GCTGATGCTGGACATACACCTATATTATTGGAAGCTAGAGATATTCTGGGGGGAAAGGTCTATATACTGTT-ATTCATAATA---TTTTCGAACACAATATTTGATCATAAATTAGTTTATAT	119	20	Ins	N/A
1051	GCTGATGCTGGACATACACCTATATTATTGGAAGCTAGAGATGTTCTGGGAGGAAAGGTCTATATGTTAATTCATAATATATTTTTATA-TTCGATCATAAATTAGTTTATAT	GCTGATGCTGGACATACACCTATATTATTTGAAGCTAGAGATGTTTTAGGAGGAAAGGTC----------TTCATAATATATTTTTATATTTTGATCATAAATTAGTTTATAT	103	20	del	N/A
1052	GCTGATGCTGGACATACACCTATATTATTGGAAGCTAGAGATGTTCTGGGAGGAAAGGTCTATATGTTAATTCATAATATATTTTTATA-TTCGATCATAAATTAGTTTATAT	GCTGATGCGGGACATACACCTATATTATTGGAAGCTAGAGATGTTTTAGGAGGAAAGGTC----------TTCATAATATATTTTTATATTTTGATCATAAATTAGTTTATAT	103	20	del	N/A
1053	GCTGATGCTGGACATACACCTATATTATTGGAAGCTAGAGATGTTCTGGGAGGAAAGGTCTATATGTTAATTCATAATATATTTTTATATTCGATCATAAATTAGTTTATAT	GCTGATGCTGGACATACCCCTATATTATTGGAAGCTAGAGATGTTTTAGGAGGAAATGTC----------TTCATAATATATTTTTATATTTGATCATAAATTAGTTTATAT	102	20	del	N/A
1054	GCTGATGCTGGACATACACCTATATTATTGGAAGCTAGAGATGTTCTGGGAGGAAAGGTCTATATGTTAATTCATAATATATTTTTATATTCGATCATAAATTAGTTTATAT	GCTGATGCTGGACATACACCTATATTATTGGAAGCTAGAGATGTTCTGGGAGGAAAGGTCTATATGTTAATGCATAATATATTTTTATATTCGATCATAAATTAGTTTATAT	112	20	Sub	N/A
1055	GCTGATGCTGGACATACACCTATATTATTGGAAGCTAGAGATGTTCTGGGAGGAAAGGTCTATA---TGTTAATTCATAATATATTTTT--------ATATTCGATCATAAATTAGTTTATAT	GCTGATGCTGGACATACACCTATATTATTGGAAGCCAGAGATGTTCTGGGGGGAAAGGTCTATATACTGTT-ATTCATAATA---TTTTCGAACACAATATTTGATCATAAATTAGTTTATAT	119	20	Ins	N/A
1056	GCTGATGCTGGACATACACCTATATTATTGGAAGCTAGAGATGTTCTGGGAGGAAAGGTCTATATGTTAATTCATAATATATTTTTATATTCGATCATAAATTAGTTTATAT	GCTGATGCTGGACATACACCTATATTATTGGAAGCCAGAGATGTTTTAGGAGGAAATGTC----------TTCATAATATATTTTTATATTTGATCATAAATTAGTTTATAT	102	20	del	N/A
1057	GCTGATGCTGGACATACACCTATATTATTGGAAGCTAGAGATGTTCTGGGAGGAAAGGTCTATATGTTAATTCATAATATATTTTTATATTCGATCATAAATTAGTTTATAT	GCTGATGCTGGACTTACACCTATATTATTGGAAGCTAGAGATGTTTTAGGAGGAAAGGTC----------TTCATAATATATTTTTATATTCGATCATAAATTAGTTTATAT	102	20	del	N/A
1058	GCTGATGCTGGACATACACCTATATTATTGGAAGCTAGAGATGTTCTGGGAGGAAAGGTCTATATGTTAATTCATAATATATTTTTATATTCGATCATAAATTAGTTTATAT	GCTGATGCTGGACATACACCTATATTATTGGAAGCTAGAGATGTTTTAGGAGGCAATGTC----------TTCATAATATATTTTTATATTTGATCATAAATTAGTTTATAT	102	20	del	N/A
1059	GCTGATGCTGGACATACACCTATATTATTGGAAGCTAGAGATGTTCTGGGAGGAAAGGTCTATATGTTAATTCATAATATATTTTTATATTCGATCATAAATTAGTTTATAT	GCTGATGCTGGACATACACCAATATTATTGGAAGCTAGAGATGTTCTGGGAGGAAAGGTCTATATGTTAATTCATAATATATTTTTATATTCGATCATAAATTAGTTTATAT	112	20	Sub	N/A
1060	GCTGATGCTGGACATACACCTATATTATTGGAAGCTAGAGATGTTCTGGGAGGAAAGGTCTATATGTTAATTCATAATATATTTTTATATTCGATCATAAATTAGTTTATAT	GCGGATGCTGGACATACACCTATATTATTGGAAGCTAGAGATGTTTTAGGAGGAAAGGTC----------TTCATAATATATTTTTGTATTTGATCATAAATTAGTTTATAT	102	20	del	N/A
1061	GCTGATGCTGGACATACACCTATATTATTGGAAGCTAGAGATGTTCTGGGAGGAAAGGTCTATATGTTAATTCATAATATATTTTTATATTCGATCATAAATTAGTTTATAT	GCTGATGCTGGGCATACACCTATACTATTGGAAGCTAGAGATGTTTTAGGAGGAAAGGTC----------TTCATAATATGTTTTTATATTTGATCATAAATTAGTTTATAT	102	20	del	N/A
1062	GCTGATGCTGGACATACACCTATATTATTGGAAGCTAGAGATGTTCTGGGAGGAAAGGTCTATATGTTAATTCATAATATATTTTTATATTCGATCATAAATTAGTTTATAT	GCTGATGCTGGACATACACCTATGTTATTGGAAGCTAGAGATGTTTTAGGAGGAAATGTC----------TTCATAATATATTTTTATATTTGATCATAAATTAGTTTATAT	102	20	del	N/A
1063	GCTGATGCTGGACATACACCTATATTATTGGAAGCTAGAGATGTTCTGGGAGGAAAGGTCTATATGTTAATTCATAATATATTTTTATATTCGATCATAAATTAGTTTATAT	GCTGATGCTGGACATACACCTATATTATTGGAAGCTAGAGATGTTTTAGGAGGAAAGGTC----------TTCATAATATATTTTTATATTTGATGATAAATTAGTTTATAT	102	20	del	N/A
1064	GCTGATGCTGGACATACACCTATATTATTGGAAGCTAGAGATGTTCTGGGAGGAAAGGTCTATA---TGTTAATTCATAATATATTTTT--------ATATTCGATCATAAATTAGTTTATAT	GCTGATGCTGGACATACACCTATATTCTTGGAAGCTAGAGATGTTCTGGGGGGAAAGGTCTATATACTGTT-ATTCATAATA---TTTTCGAACACAATATTTGATCATAAATTAGTTTATAT	119	20	Ins	N/A
1065	GCTGATGCTGGACATACACCTATATTATTGGAAGCTAGAGATGTTCTGGGAGGAAAGGTCTATATGTTAATTCATAATATATTTTTATATTCGATCATAAATTAGTTTATAT	GCTGATGCTGGACATACACCTATATGATGGGAAGCTAGAGATGTTTTAGGAGGAAATGTC----------TTCATAATACATTTTTATATTTGATCATAAATTAGTTTATAT	102	20	del	N/A
1066	GCTGATGCTGGACATACACCTATATTATTGGAAGCTAGAGATGTTCTGGGAGGAAAGGTCTATATGTTAATTCATAATATATTTTTATATTCGATCATAAATTAGTTTATAT	GCTGATGCTGGACATACACCTATATTATTGGAAGCTAGAGATGTTTTAGGAGGAAAGGTCTATATGTTAATTCATAATATATTTTTATATTTGATCATAAATTAGTTTATGT	112	20	Sub	N/A
1067	GCTGATGCTGGACATACACCTATATTATTGGAAGCTAGAGATGTTCTGGGAGGAAAGGTCTATATGTTAATTCATAATATATTTTTATATTCGATCATAAATTAGTTTATAT	GCTGATGCTGGCCATACACCTATACTATTGGAAGCTAGAGATGTTTTAGGAGGAAAGGTC----------TTCATAATATGTTTTTATATTTGATCATAAATTAGTTTATAT	102	20	del	N/A
1068	GCTGATGCTGGACATACACCTATATTATTGGAAGCTAGAGATGTTCTGGGAGGAAAGGTCTATATGTTAATTCATAATATATTTTTATA-TTCGATCATAAATTAGTTTATAT	GCTGATGCTGTACATACACCTATATTATTGGAAGCTAGAGATGTTTTAGGAGGAAAGGTC----------TTCATAATATATTTTTATATTTTGATCATAAATTAGTTTATAT	103	20	del	N/A
1069	GCTGATGCTGGACATACACCTATATTATTGGAAGCTAGAGATGTTCTGGGAGGAAAGGTCTATATGTTAATTCATAATATATTTTTATATTCGATCATAAATTAGTTTATAT	GCTGATGCTGGACATACACCTATATTATTAGAAGCTAAAGATGTTCTATGAGGAAAGGTCTATATGTTAATTCATAATATATTTTTATATTTGATCATAAATTAGTTTATAT	112	20	Sub	N/A
1070	GCTGATGCTGGACATACACCTATATTATTGGAAGCTAGAGATGTTCTGGGAGGAAAGGTCTATATGTTAATTCATAATATATTTTTATATTCGATCATAAATTAGTTTATAT	GCGGATGCTGGACATACACCTATATTATTGGAAGCTAGAGATGTTTTAGGAGGAAAGGTC----------TTCATAATACATTTTTATATTTGATCATAAATTAGTTTATAT	102	20	del	N/A
1071	GCTGATGCTGGACATACACCTATATTATTGGAAGCTAGAGATGTTCTGGGAGGAAAGGTCTATATGTTAATTCATAATATATTTTTATATTCGATCATAAATTAGTTTATAT	GCTGATGCTGGATATACACCTATATTATTGGAAGCTAGAGATGTTTTAGGAGGAAAGGTC----------TTCATAATATATTTTTGTATTTGATCATAAATTAGTTTATAT	102	20	del	N/A
1072	GCTGATGCTGGACATACACCTATATTATTGGAAGCTAGAGATGTTCTGGGAGGAAAGGTCTATATGTTAATTCATAATATATTTTTATATTCGATCATAAATTAGTTTATAT	GCTGATGCTGGACATACACCTATATTATTGGAAGATAGAGATGTTCTGGGAGGAAAGGTCTATATGTTAATCCATAATATATTTTTATATTCGATCATAAATTAGTTTATAT	112	20	Sub	N/A
1073	GCTGATGCTGGACATACACCTATATTATTGGAAGCTAGAGATGTTCTGGGAGGAAAGGTCTATATGTTAATTCATAATATATTTTTATATTCGATCATAAATTAGTTTATAT	GCTGATGCTGGACATACACCTATATTACTGGAGGCTAGAGATGTTTTAGGAGGAAATGTC----------TTCATAATACATTTTTATATTTGATCATAAATTAGTTTATAT	102	20	del	N/A
1074	GCTGATGCTGGACATACACCTATATTATTGGAAGCTAGAGATGTTCTGGGAGGAAAGGTCTATA---TGTTAATTCATAATATATTTTT--------ATATTCGATCATAAATTAGTTTATAT	GCTGAAGCTGGACATACACCTATATTATTGGAAGCTAGAGATGTTCTGGGGGGAAAGGTCTATATACTGTT-ATTCATAATA---TTTTCGAACACAATATTTGATCATAAATTAGTTTATAT	119	20	Ins	N/A
1075	GCTGATGCTGGACATACACCTATATTATTGGAAGCTAGAGATGTTCTGGGAGGAAAGGTCTATATGTTAATTCATAATATATTTTTATATTCGATCATAAATTAGTTTATAT	GCTGATGCTGGACATACACCTATATTATTGGAAGCTAGAGATGTTTTAGGAGGAAAGGTC----------TTCATAATATATATTTATATTTGATCATAAATTAGTTTATAT	102	19	del	N/A
1076	GCTGATGCTGGACATACACCTATATTATTGGAAGCTAGAGATGTTCTGGGAGGAAAGGTCTATATGTTAATTCATAATATATTTTTATATTCGATCATAAATTAGTTTATAT	GCTGATGCTGGACATACACCTATACTATTGGAAGCTAGAGATGTTCTGGGAGGAAAGGTCTATATGTTAATTCATAATATATTTTTATATTTGATCATAAATTAGTTTATAT	112	19	Sub	N/A
1077	GCTGATGCTGGACATACACCTATATTATTGGAAGCTAGAGATGTTCTGGGAGGAAAGGTCTATATGTTAATTCATAATATATTTTTATATTCGATCATAAATTAGTTTATAT	GCGGATGCTGGACATACACCTATATTAGTGGAAGCTAGAGATGTTTTAGGAGGAAAGGTC----------TTCATAATATATTTTTATATTTGATCATAAATTAGTTTATAT	102	19	del	N/A
1078	GCTGATGCTGGACATACACCTATATTATTGGAAGCTAGAGATGTTCTGGGAGGAAAGGTCTATATGTTAATTCATAATATATTTTTATATTCGATCATAAATTAGTTTATAT	GCTGATGCTGGACATACACCTATATTATTGGAAGCTAGAGATGTTTTAGGAGGAAATGTC----------CTCATAATATATTTTTATATTTGATCATAAATTAGTTTATAT	102	19	del	N/A
1079	GCTGATGCTGGACATACACCTATATTATTGGAAGCTAGAGATGTTCTGGGAGGAAAGGTCTATATGTTAATTCATAATATATTTTTATATTCGATCATAAATTAGTTTATAT	GCTGATGCTGGACATACACCTATATTATTGGAAGCTAGAGATGTTTTAGGAGGAAAGGTC----------TTAATAATATATTTTTATATTTGATCATAAATTAGTTTATAT	102	19	del	N/A
1080	GCTGATGCTGGACATACACCTATATTATTGGAAGCTAGAGATGTTCTGGGAGGAAAGGTCTATATGTTAATTCATAATATATTTTTATATTCGATCATAAATTAGTTTATAT	GCTGATGCTGGACATACACCTATATTATTGGAAGCTAGAGATGTTCTGGGAGGAAAGGTCTATATGTTAATTCATAATATATTTTTATATTCGATCATAAATTACTTTATAT	112	19	Sub	N/A
1081	GCTGATGCTGGACATACACCTATATTATTGGAAGCTAGAGATGTTCTGGGAGGAAAGGTCTATA---TGTTAATTCATAATATATTTTT--------ATATTCGATCATAAATTAGTTTATAT	GCTGATGCTGGACATACACCTATATCATTGGAAGCTAGAGATGTTCTGGGGGGAAAGGTCTATATACTGTT-ATTCATAATA---TTTTCGAACACAATATTTGATCATAAATTAGTTTATAT	119	19	Ins	N/A
1082	GCTGATGCTGGACATACACCTATATTATTGGAAGCTAGAGATGTTCTGGGAGGAAAGGTCTATA---TGTTAATTCATAATATATTTTT--------ATATTCGATCATAAATTAGTTTATAT	GCTGATGCTGGACATACATCTATATTATTGGAAGCTAGAGATGTTCTGGGGGGAAAGGTCTATATACTGTT-ATTCATAATA---TTTTCGAACACAATATTTGATCATAAATTAGTTTATAT	119	19	Ins	N/A
1083	GCTGATGCTGGACATACACCTATATTATTGGAAGCTAGAGATGTTCTGGGAGGAAAGGTCTATATGTTAATTCATAATATATTTTTATATTCGATCATAAATTAGTTTATAT	GCTGATGCTGGACATACACCTATATTATTGGAAGCTAGAGATGTTTTAGGAGGAAAGGTC----------TTCATAATAAATTTTTATATTTGATCATAAATTAGTTTATAT	102	19	del	N/A
1084	GCTGATGCTGGACATACACCTATATTATTGGAAGCTAGAGATGTTCTGGGAGGAAAGGTCTATA---TGTTAATTCATAATATATTTTT--------ATATTCGATCATAAATTAGTTTATAT	GCTGATGCTGGACATACACCTATATTATTGGAAGCTAGAGATGTTCTGGGGGGAAAGGTCTATATACTGTT-ATTCATAATA---TTTTCGAACACAATATTTAATCATAAATTAGTTTATAT	119	19	Ins	N/A
1085	GCTGATGCTGGACATACACCTATATTATTGGAAGCTAGAGATGTTCTGGGAGGAAAGGTCTATA---TGTTAATTCATAATATATTTTT--------ATATTCGATCATAAATTAGTTTATAT	GCTGATGCTGGACATACACCTATATTATTGGAAGCTAGAGATGTTTTAGGAGGAAATGTCTATATACTGTT-ATTCATAATA---TTTTCGAACACAATATTTGATCATAAATTAGTTTATAT	119	19	Ins	N/A
1086	GCTGATGCTGGACATACACCTATATTATTGGAAGCTAGAGATGTTCTGGGAGGAAAGGTCTATATGTTAATTCATAATATATTTTTATA-TTCGATCATAAATTAGTTTATAT	GCTGACGCTGGACATACACCTATATTATTGGAAGCTAGAGATGTTTTAGGAGGAAAGGTC----------TTCATAATATATTTTTATATTTTGATCATAAATTAGTTTATAT	103	19	del	N/A
1087	GCTGATGCTGGACATACACCTATATTATTGGAAGCTAGAGATGTTCTGGGAGGAAAGGTCTATATGTTAATTCATAATATATTTTTATATTCGATCATAAATTAGTTTATAT	GCTGATGCTGGACATACACCTATATTATTGGAAGCTAGAGATGTTCTGGGAGGAAAGGTCTATATGTTAAGTCATAATATATTTTTATATTCGATCATAAATTAGTTTATAT	112	19	Sub	N/A
1088	GCTGATGCTGGACATACACCTATATTATTGGAAGCTAGAGATGTTCTGGGAGGAAAGGTCTATATGTTAATTCATAATATATTTTTATA-TTCGATCATAAATTAGTTTATAT	GCTGATGCTGGACATACACCTATATTATTGGAAGCTAGAGATGTTTTAAGAGGAAAGGTC----------TTCATAATATATTTTTATATTTTGATCATAAATTAGTTTATAT	103	19	del	N/A
1089	GCTGATGCTGGACATACACCTATATTATTGGAAGCTAGAGATGTTCTGGGAGGAAAGGTCTATATGTTAATTCATAATATATTTTTATATTCGATCATAAATTAGTTTATAT	GCTGATGCTGGACATACACCTATATTATTGGAAGCTAGAGATGTTTTAGGAGGAAAGGT----------GTTCATAATATATTTTTATATTTGATCATAAATTAGTTTATAT	102	19	del	N/A
1090	GCTGATGCTGGACATACACCTATATTATTGGAAGCTAGAGATGTTCTGGGAGGAAAGGTCTATATGTTAATTCATAATATATTTTTATATTCGATCATAAATTAGTTTATAT	GCTGAGGCTGGACATACACCTATATGATTGGAAGCTAGAGATGTTCTGGGAGGAAAGGTCTATATGTTAATTCATAATATATTTTTATATTCGATCATAAATTAGTTTATAT	112	19	Sub	N/A
1091	GCTGATGCTGGACATACACCTATATTATTGGAAGCTAGAGATGTTCTGGGAGGAAAGGTCTATATGTTAATTCATAATATATTTTTATATTCGATCATAAATTAGTTTATAT	GCTGATGCTGGACATACACCTATATTTTTGGAAGCTAGAGATGTTTTAGGAGGAAATGTC----------TTCATAATACATTTTTATATTTGATCATAAATTAGTTTATAT	102	19	del	N/A
1092	GCTGATGCTGGACATACACCTATATTATTGGAAGCTAGAGATGTTCTGGGAGGAAAGGTCTATATGTTAATTCATAATATATTTTTATATTCGATCATAAATTAGTTTATAT	GCTGATGCTGGACATACACCTATATTACTGGACGCTAGAGATGTTCTGGGAGGAAAGGTCTATATGTTAATTCATAATATATTTTTATATTCGATCATAAATTAGTTTATAT	112	19	Sub	N/A
1093	GCTGATGCTGGACATACACCTATATTATTGGAAGCTAGAGATGTTCTGGGAGGAAAGGTCTATATGTTAATTCATAATATATTTTTATATTCGATCATAAATTAGTTTATAT	GCTGAGGCTGGACATACACCTATATGATTGGAAGCTAGAGATGTTTTAGGAGGAAAGGTC----------TTCATAATATATTTTTATATTTGATCATAAATTAGTTTATAT	102	19	del	N/A
1094	GCTGATGCTGGACATACACCTATATTATTGGAAGCTAGAGATGTTCTGGGAGGAAAGGTCTATATGTTAATTCATAATATATTTTTATATTCGATCATAAATTAGTTTATAT	GGTGATGCTGGACATACATCTATATTATTGGAAGCTAGAGATGTTTTAGGAGGAAAGGTC----------TTCATAATATATTTTTATATTTGATCATAAATTAGTTTATAT	102	19	del	N/A
1095	GCTGATGCTGGACATACACCTATATTATTGGAAGCTAGAGATGTTCTGGGAGGAAAGGTCTATATGTTAATTCATAATATATTTTTATATTCGATCATAAATTAGTTTATAT	GCTGATGCTGGACATACACCTATATTATTGGAAGCTAGAGATGTTTTAGGAGGAAATGTC----------TTCATAATATATTTTTATATTTGATAATAAATTAGTTTATAT	102	18	del	N/A
1096	GCTGATGCTGGACATACACCTATATTATTGGAAGCTAGAGATGTTCTGGGAGGAAAGGTCTATATGTTAATTCATAATATATTTTTATATTCGATCATAAATTAGTTTATAT	GCTGATGCTGGACATACACCTATATTATTGGAAGCTAGAGATGTTTTAGGAGGAAATGTC----------TTCATAATACATTTTTATATTTGATCATAAATGAGTTTATAT	102	18	del	N/A
1097	GCTGATGCTGGACATACACCTATATTATTGGAAGCTAGAGATGTTCTGGGAGGAAAGGTCTATATGTTAATTCATAATATATTTTTATATTCGATCATAAATTAGTTTATAT	GCTGATGCTGGACATACACCTATATTATTGGAAGCTAGAGATGTTCTGGGAGGAAAGGTCTATATGTTAATTCATAATATATTTTTATATTCGATCATAAATTAGTTTAAAT	112	18	Sub	N/A
1098	GCTGATGCTGGACATACACCTATATTATTGGAAGCTAGAGATGTTCTGGGAGGAAAGGTCTATATGTTAATTCATAATATATTTTTATATTCGATCATAAATTAGTTTATAT	GCTGATGCTGGACATACACCTATATTATTGGAAGCTAGAGATGTTCTGGGAGGAAAGGTCTATATGTTAATTCATAATATATTTTTATATTCGATCATAATTTAGTTTATAT	112	18	Sub	N/A
1099	#NAME?	GCTGATGCTGGACATACACCGCTGATGCTGGACATACACCTATATTATTGGAAGCTAGAGATGTTTTAAGAGGAAAGGTC----------TTCATAATATATTTTTATATTTGATCATAAATTAGTTTATAT	122	18	Ins	N/A
1100	GCTGATGCTGGACATACACCTATATTATTGGAAGCTAGAGATGTTCTGGGAGGAAAGGTCTATATGTTAATTCATAATATATTTTTATATTCGATCATAAATTAGTTTATAT	GCTGATGCTGGACATACACCTATATTATTGGAAGCTAGAGATGTTTTAGGCGGAAATGTC----------TTCATAATACATTTTTATATTTGATCATAAATTAGTTTATAT	102	18	del	N/A
1101	GCTGATGCTGGACATACACCTATATTATTGGAAGCTAGAGATGTTCTGGGAGGAAAGGTCTATATGTTAATTCATAATATATTTTTATA-TTCGATCATAAATTAGTTTATAT	GCTGATTCTGGACATACACCTATATTATTGGAAGCTAGAGATGTTTTAGGAGGAAAGGTC----------TTCATAATATATTTTTATATTTTGATCATAAATTAGTTTATAT	103	18	del	N/A
1102	GCTGATGCTGGACATACACCTATATTATTGGAAGCTAGAGATGTTCTGGGAGGAAAGGTCTATATGTTAATTCATAATATATTTTTATATTCGATCATAAATTAGTTTATAT	GCTGATGCTGGACATACACCTATATTATTGGAAGCTAGAGATGTTTTAGGAGGACATGTC----------TTCATAATACATTTTTATATTTGATCATAAATTAGTTTATAT	102	18	del	N/A
1103	GCTGATGCTGGACATACACCTATATTATTGGAAGCTAGAGATGTTCTGGGAGGAAAGGTCTATATGTTAATTCATAATATATTTTTATATTCGATCATAAATTAGTTTATAT	GCTGATGCTGGACATACACCTATATTATTGGAAGCTAGAGATGTTTTAGGAGGAAAGGTC----------TTCATAATATATTTTTATATTAGATCATAAATTAGTTTATAT	102	18	del	N/A
1104	GCTGATGCTGGACATACACCTATATTATTGGAAGCTAGAGATGTTCTGGGAGGAAAGGTCTATA---TGTTAATTCATAATATATTTTT--------ATATTCGATCATAAATTAGTTTATAT	GCTGATGCTGGACATACACCTATATTATTGGGAGCTAGAGATGTTCTGGGGGGAAAGGTCTATATACTGTT-ATTCATAATA---TTTTCGAACACAATATTTGATCATAAATTAGTTTATAT	119	18	Ins	N/A
1105	GCTGATGCTGGACATACACCTATATTATTGGAAGCTAGAGATGTTCTGGGAGGAAAGGTCTATA---TGTTAATTCATAATATATTTTT--------ATATTCGATCATAAATTAGTTTATAT	GCTGATGCTGGACATACACCTATATTATTGGAAGCTAGAGATGTTCTGGGGGGAAAGGTCTATATACTGTT-ATTCATAATA---TTTTCGAATACAATATTTGATCATAAATTAGTTTATAT	119	18	Ins	N/A
1106	GCTGATGCTGGACATACACCTATATTATTGGAAGCTAGAGATGTTCTGGGAGGAAAGGTCTATATGTTAATTCATAATATATTTTTATATTCGATCATAAATTAGTTTATAT	GCTGATGCTGGACATACACCTATATTATTGGAAGCTAGAGATGTTTTAGGAGGAAAGGTC----------TTCATAATATATTTTTATATTTGATCATAAATTAGTTTAGAT	102	18	del	N/A
1107	GCTGATGCTGGACATACACCTATATTATTGGAAGCTAGAGATGTTCTGGGAGGAAAGGTCTATA---TGTTAATTCATAATATATTTTTATATTCGATCATAAATTAGTTTATAT	GCTGATGCTGGACATACACCTATATTATTGGAAGCTAGAGATGTTCTGGGAGGAAAGGTCTATATACTGTT-ATTCATAATATATTTTTATATTCGATCATAAATTAGTTTATAT	114	18	Ins	N/A
1108	GCTGATGCTGGACATACACCTATATTATTGGAAGCTAGAGATGTTCTGGGAGGAAAGGTCTATA---TGTTAATTCATAATATATTTTT--------ATATTCGATCATAAATTAGTTTATAT	GCTGATGCTGGACATACACCTATACTATTGGAAGCTAGAGATGTTCTGGGAGGAAAGGTCTATATACTGTT-ATTCATAATA---TTTTCGAACACAATATTTGATCATAAATTAGTTTATAT	119	18	Ins	N/A
1109	GCTGATGCTGGACATACACCTATATTATTGGAAGCTAGAGATGTTCTGGGAGGAAAGGTCTATA---TGTTAATTCATAATATATTTTT--------ATATTCGATCATAAATTAGTTTATAT	GCTGATGCTGGACATACACCTATATTATTGGAAGCTAGAGATGTTCTGGGGGGAAAGGTCTATATACTGTT-ATTCATAATA---TTTTCGCACACAATATTTGATCATAAATTAGTTTATAT	119	18	Ins	N/A
1110	GCTGATGCTGGACATACACCTATATTATTGGAAGCTAGAGATGTTCTGGGAGGAAAGGTCTATATGTTAATTCATAATATA-TTTTTATATTCGATCATAAATTAGTTTATAT	GCTGATGCTGGACATACACCTATATTATTGGAAGCTAGAGATGTTTTAGGAGGAAATGTC----------TTCATAATACATTTTTTATATTTGATCATAAATTAGTTTATAT	103	18	del	N/A
1111	GCTGATGCTGGACATACACCTATATTATTGGAAGCTAGAGATGTTCTGGGAGGAAAGGTCTATATGTTAATTCATAATATATTTTTATATTCGATCATAAATTAGTTTATAT	GCTGATGCTGGACATACACCTATATTATTGGAAGCTAGAGATGTTTTAGGAGGAAATGTC----------TTCATAATACATTATTATATTTGATCATAAATTAGTTTATAT	102	18	del	N/A
1112	GCTGATGCTGGACATACACCTATATTATTGGAAGCTAGAGATGTTCTGGGAGGAAAGGTCTATATGTTAATTCATAATATATTTTTATATTCGATCATAAATTAGTTTATAT	GCTGATGCTGGACATAAACCTATATTATTGGAAGCTAGAGATGTTTTAGGAGGAAAGGTC----------TTCATAATATATTTTTATATTTGATCATAAATTAGTTTATAT	102	18	del	N/A
1113	GCTGATGCTGGACATACACCTATATTATTGGAAGCTAGAGATGTTCTGGGAGGAAAGGTCTATATGTTAATTCATAATATATTTTTATATTCGATCATAAATTAGTTTATAT	GCTGATGCTGGACATACTCCTATATTATTGGAAGCTAGAGATGTTCTGGGAGGAAAGGTCTATATGTTAATTCATAATATATTTTTATATTCGATCATAAATTAGTTTATAT	112	18	Sub	N/A
1114	GCTGATGCTGGACATACACCTATATTATTGGAAGCTAGAGATGTTCTGGGAGGAAAGGTCTATATGTTAATTCATAATATATTTTTATATTCGATCATAAATTAGTTTATAT	GCTGATGCTGGACATACACCTATATTATTGGAAGCTAGAGATGTTTTAGGAGGAAAGG----------ACTTCATAATATATTTTTATATTTGATCATAAATTAGTTTATAT	102	18	del	N/A
1115	GCTGATGCTGGACATACACCTATATTATTGGAAGCTAGAGATGTTCTGGGAGGAAAGGTCTATATGTTAATTCATAATATATTTTTATATTCGATCATAAATTAGTTTATAT	GCTGATGCTGGACATACACCTTTATTATTGGAAGCTAGAGATGTTTTAGGAGGAAATGTC----------TTCATAATACATTTTTATATTTGATCATAAATTAGTTTATAT	102	18	del	N/A
1116	GCTGATGCTGGACATACACCTATATTATTGGAAGCTAGAGATGTTCTGGGAGGAAAGGTCTATATGTTAATTCATAATATA-TTTTTATATTCGATCATAAATTAGTTTATAT	GCTGATGCTGGACATACACCTATATTATTGGAAGCTAGAGATGTTTTAGGAGGAAAGGTC----------TTCATAATATATTTTTTATATTTGATCATAAATTAGTTTATAT	103	18	del	N/A
1117	GCTGATGCTGGACATACACCTATATTATTGGAAGCTAGAGATGTTCTGGGAGGAAAGGTCTATATGTTAATTCATAATATATTTTTATATTCGATCATAAATTAGTTTATAT	GCTGATGCTGGACATACACCTATATTATTGGAAGATAGAGATGCTTTAGGAGGAAAGGTC----------TTCATAATATATTTTTATATTTGATCATAAATTAGTTTATAT	102	18	del	N/A
1118	GCTGATGCTGGACATACACCTATATTATTGGAAGCTAGAGATGTTCTGGGAGGAAAGGTCTATATGTTAATTCATAATATATTTTTATATTCGATCATAAATTAGTTTATAT	GCTGATGCTGGACATACACCTATATGATTGGAAGCTAGAGAAGTTCTGGGAGGAAAGGTCTATATGTTAATTCATAATATATTTTTATATTCGATCATAAATTAGTTTATAT	112	18	Sub	N/A
1119	GCTGATGCTGGACATACACCTATATTATTGGAAGCTAGAGATGTTCTGGGAGGAAAGGTCTATATGTTAATTCATAATATATTTTTATATTCGATCATAAATTAGTTTATAT	GCTGATGCTGGACATACACCTATATTATCGGAAGCTAGAGATGTTCTGGGAGGAAAGGTCTGTATGTTAATTCATAATATATTTTTATATTCGATCATAAATTAGTTTATAT	112	17	Sub	N/A
1120	GCTGATGCTGGACATACACCTATATTATTGGAAGCTAGAGATGTTCTGGGAGGAAAGGTCTATATGTTAATTCATAATATATTTTTATATTCGATCATAAATTAGTTTATAT	GCTGATGCTGGACATATACCTATATTATTGGAAGCTAGAGATGTTTTAGGAGGAAATGTC----------TTCATAATATATTTTTATATTTGATCATAAATTAGTTTATAT	102	17	del	N/A
1121	GCTGATGCTGGACATACACCTATATTATTGGAAGCTAGAGATGTTCTGGGAGGAAAGGTCTATATGTTAATTCATAATATATTTTTATATTCGATCATAAATTAGTTTATAT	GCTGATGCTGGACATACACCTATATTATTGGAAGGTAGAGATGTTTTAGGAGGAAATGTC----------TTCATAATATATTTTTATATTTGATCATAAATTAGTTTATAT	102	17	del	N/A
1122	GCTGATGCTGGACATACACCTATATTATTGGAAGCTAGAGATGTTCTGGGAGGAAAGGTCTATATGTTAATTCATAATATATTTTTATATTCGATCATAAATTAGTTTATAT	GCTGATGCTGGACATACACCTATATTATTGGAAGCTAGAGATGTTCTGGGAGGAATGGTCTATATGTTAATTCATAATATATTTTTATATTCGATCATAAATTAGTTTATAT	112	17	Sub	N/A
1123	GCTGATGCTGGACATACACCTATATTATTGGAAGCTAGAGATGTTCTGGGAGGAAAGGTCTATATGTTAATTCATAATATATTTTTATATTCGATCATAAATTAGTTTATAT	GCTGATGCTGGACATACACCTATATTATTGGAAGCTAGAGATGTTCTGGGAGGAAAGGTCTATATGTTAATTCATAATATATTTTTATATTCGATCATAAATGAGTTTATAT	112	17	Sub	N/A
1124	GCTGATGCTGGACATACACCTATATTATTGGAAGCTAGAGATGTTCTGGGAGGAAAGGTCTATATGTTAATTCATAATATATTTTTATATTCGATCATAAATTAGTTTATAT	GCTGATGCTGGACATACACCTATATTATTGGAAGCTAGAGATGTTTTAGGAGGAAAGGTC----------TTCATAATATGTTTTTATATTCGATCATAAATTAGTTTATAT	102	17	del	N/A
1125	GCTGATGCTGGACATACACCTATATTATTGGAAGCTAGAGATGTTCTGGGAGGAAAGGTCTATA---TGTTAATTCATAATATATTTTT--------ATATTCGATCATAAATTAGTTTATAT	GCTGATGCTGGACATACACCTATATTATTGGAAGTTAGAGATGTTCTGGGGGGAAAGGTCTATATACTGTT-ATTCATAATA---TTTTCGAACACAATATTTGATCATAAATTAGTTTATAT	119	17	Ins	N/A
1126	GCTGATGCTGGACATACACCTATATTATTGGAAGCTAGAGATGTTCTGGGAGGAAAGGTCTATATGTTAATTCATAATATATTTTTATA-TTCGATCATAAATTAGTTTATAT	GCTGATGCTGGACATACACCTATATTATTGTAAGCTAGAGATGTTTTAGGAGGAAAGGTC----------TTCATAATATATTTTTATATTTTGATCATAAATTAGTTTATAT	103	17	del	N/A
1127	GCTGATGCTGGACATACACCTATATTATTGGAAGCTAGAGATGTTCTGGGAGGAAAGGTCTATATGTTAATTCATAATATATTTTTATATTCGATCATAAATTAGTTTATAT	GCTGATGCTGGACATACACCTATACTATTGGCAGCTAGAGATGTTTTAGGAGGAAAGGTC----------TTCATAATATGTTTTTATATTTGATCATAAATTAGTTTATAT	102	17	del	N/A
1128	#NAME?	GCTGATGCTGGACATACACCGCTGATGCTGGACATACACCGCTGATGCTGGACATACACCTATATTATTGGAAGCTAGAGATGTTTTAGGAGGAAAGGTC----------TTCATAATATATTTTTATATTTTGATCATAAATTAGTTTATAT	143	17	Ins	N/A
1129	GCTGATGCTGGACATACACCTATATTATTGGAAGCTAGAGATGTTCTGGGAGGAAAGGTCTATATGTTAATTCATAATATATTTTTATATTCGATCATAAATTAGTTTATAT	GCTGATGCTGGACATACACCTATATTAGTGGAAGCGAGAGATGTTTTAGGAGGAAATGTC----------TTCATAATACATTTTTATATTTGATCATAAATTAGTTTATAT	102	17	del	N/A
1130	GCTGATGCTGGACATACACCTATATTATTGGAAGCTAGAGATGTTCTGGGAGGAAAGGTCTATA---TGTTAATTCATAATATATTTTT--------ATATTCGATCATAAATTAGTTTATAT	GCTGATGCTGGACATACACCTATATTATTGGAAGCTAGAGATGTTCTGGG-GGAAAGGTCTATATACTGTT-ATTCATAATA---TTTTCAAACACAATATTTGATCACAAATTAGTTTATAT	118	17	Ins	N/A
1131	GCTGATGCTGGACATACACCTATATTATTGGAAGCTAGAGATGTTCTGGGAGGAAAGGTCTATATGTTAATTCATAATATATTTTTATATTCGATCATAAATTAGTTTATAT	GCTGATGCTGGACATACACCTATATTATTGGAAGCTAGAGATGTTTTAGGAGGAAAGGTC----------TTCATAATATATTTTTATATTTCATCATAAATTAGTTTATAT	102	17	del	N/A
1132	GCTGATGCTGGACATACACCTATATTATTGGAAGCTAGAGATGTTCTGGGAGGAAAGGTCTATATGTTAATTCATAATATATTTTTATATTCGATCATAAATTAGTTTATAT	GCTGAGGCTGGACATACACCTATATTATTGGAAGCTAGAGATGTTTTAGGAGGAAAGGTC----------TTCATAATATATTTTTGTATTTGATCATAAATTAGTTTATAT	102	17	del	N/A
1133	GCTGATGCTGGACATACACCTATATTATTGGAAGCTAGAGATGTTCTGGGAGGAAAGGTCTATATGTTAATTCATAATATATTTTTATATTCGATCATAAATTAGTTTATAT	GCTGATGCTGGACATACACCTATATTATTGGAAGCTAGAGATGTTTTAGGAGGAAAGGTC----------TTCATAATATATTTTTATATTTGATCATAAAGTAGTTTATAT	102	17	del	N/A
1134	GCTGATGCTGGACATACACCTATATTATTGGAAGCTAGAGATGTTCTGGGAGGAAAGGTCTATATGTTAATTCATAATATATTTTTATATTCGATCATAAATTAGTTTATAT	GCTGATGCTGGACATACACCTATATTATTGGAAGCTAGAGATGTTTTAGGAGGAAAGGTC----------TGCATAATATATTTTTATATTTGATCATAAATTAGTTTATAT	102	17	del	N/A
1135	GCTGATGCTGGACATACACCTATATTATTGGAAGCTAGAGATGTTCTGGGAGGAAAGGTCTATATGTTAATTCATAATATATTTTTATATTCGATCATAAATTAGTTTATAT	GCTGATGCTGGACATACACCTATATGATGGGAAGCTAGAGATGTTCTGGGAGGAAAGGTCTATATGTTAATTCATAATATATTTTTATATTCGATCATAAATTAGTTTATAT	112	17	Sub	N/A
1136	GCTGATGCTGGACATACACCTATATTATTGGAAGCTAGAGATGTTCTGGGAGGAAAGGTCTATATGTTAATTCATAATATATTTTTATATTCGATCATAAATTAGTTTATAT	GCTGATGCTGGACATACACCTATATTATTGGCAGCTAGAGCTGTTCTGGGAGGAAAGGTCTATATGTTAATTCATAATATATTTTTATATTCGATCATAAATTAGTTTATAT	112	17	Sub	N/A
1137	GCTGATGCTGGACATACACCTATATTATTGGAAGCTAGAGATGTTCTGGGAGGAAAGGTCTATATGTTAATTCATAATATATTTTTATATTCGATCATAAATTAGTTTATAT	GCTGATGCTGGACATACACCTATATTATTGGAAGCTAGAGATGTTCTGGGAGGAAAGGTCTATATGTAAATTCATAATATATTTTTATATTCGATCATAAATTAGTTTATAT	112	17	Sub	N/A
1138	GCTGATGCTGGACATACACCTATATTATTGGAAGCTAGAGATGTTCTGGGAGGAAAGGTCTATATGTTAATTCATAATATATTTTTATATTCGATCATAAATTAGTTTATAT	GCTGATGCTGGACATACACCTATATTATTGGAAGCTAGAGATGTTTTAGGAGGAAAGGTC----------TTCAT-ATATATTTTTATATTTGATCATAAATTAGTTTATAT	101	17	del	N/A
1139	GCTGATGCTGGACATACACCTATATTATTGGAAGCTAGAGATGTTCTGGGAGGAAAGGTCTATATGTTAATTCATAATATATTTTTATATTCGATCATAAATTAGTTTATAT	GCTGATGCTGGACATACACCTATATTATTGGAAGCTAGAGATGTTTTAGGAGGATAGGTC----------TTCATAATATATTTTTATATTTGATCATAAATTAGTTTATAT	102	17	del	N/A
1140	GCTGATGCTGGACATACACCTATATTATTGGAAGCTAGAGATGTTCTGGGAGGAAAGGTCTATATGTTAATTCATAATATATTTTTATATTCGATCATAAATTAGTTTATAT	GCTGATGCTGGACATAAACCTATATTATTGGAAGCTAGAGATGTTCTGGGAGGAAAGGTCTATATGTTAATTCATAATATATTTTTATATTCGATCATAAATTAGTTTATAT	112	17	Sub	N/A
1141	GCTGATGCTGGACATACACCTATATTATTGGAAGCTAGAGATGTTCTGGGAGGAAAGGTCTATATGTTAATTCATAATATATTTTTATATTCGATCATAAATTAGTTTATAT	GCTGTTGCTGGACATACACCTATATTATTGGAAGCTAGAGATGTTTTAGGAGGAAATGTC----------TTCATAATACATTTTTATATTTGATCATAAATTAGTTTATAT	102	17	del	N/A
1142	GCTGATGCTGGACATACACCTATATTATTGGAAGCTAGAGATGTTCTGGGAGGAAAGGTCTATA---TGTTAATTCATAATATATTTTT--------ATATTCGATCATAAATTAGTTTATAT	GCTGATGCTGGACATACACCTATATTATTGGAAGCTAGAGATGTTCTGGGGGGAAAGGTCTATATATTGTT-ATTCATAATA---TTTTCGAACACAATATTTGATCATAAATTAGTTTATAT	119	17	Ins	N/A
1143	GCTGATGCTGGACATACACCTATATTATTGGAAGCTAGAGATGTTCTGGGAGGAAAGGTCTATATGTTAATTCATAATATATTTTTATATTCGATCATAAATTAGTTTATAT	GCTGATGCTGGACATACACCTATATTATTGGAAGCTAGAGATGTTTTAGGAGGAAAGGTC----------TTCATAATATAATTTTATATTTGATCATAAATTAGTTTATAT	102	17	del	N/A
1144	GCTGATGCTGGACATACACCTATATTATTGGAAGCTAGAGATGTTCTGGGAGGAAAGGTCTATA---TGTTAATTCATAATATATTTTT--------ATATTCGATCATAAATTAGTTTATAT	GCTGATGCTGGACACACACCTATATTATTGGAAGCTAGAGATGTTCTGGGGGGAAAGGTCTATATACTGTT-ATTCATAATA---TTTTCGAACACAATATTTGATCATAAATTAGTTTATAT	119	17	Ins	N/A
1145	GCTGATGCTGGACATACACCTATATTATTGGAAGCTAGAGATGTTCTGGGAGGAAAGGTCTATATGTTAATTCATAATATATTTTTATATTCGATCATAAATTAGTTTATAT	GCTGATGCTGGACATACACCTATATTATTAGAAGCTAGAGATGTTTTAGGAGGAAATGTC----------TTCATAATATATTTTTATATTTGATCATAAATTAGTTTATAT	102	17	del	N/A
1146	GCTGATGCTGGACATACACCTATATTATTGGAAGCTAGAGATGTTCTGGGAGGAAAGGTCTATATGTTAATTCATAATATATTTTTATATTCGATCATAAATTAGTTTATAT	GCTGATGCTGGACATACACCTATATTATTGGAAGCTAGAGATGTTTTAGGAGGAAATGTC----------TTCATAATACATTTTTATATTTGATCATAAAGTAGTTTATAT	102	17	del	N/A
1147	GCTGATGCTGGACATACACCTATATTATTGGAAGCTAGAGATGTTCTGGGAGGAAAGGTCTATATGTTAATTCATAATATATTTTTATATTCGATCATAAATTAGTTTATAT	GCTGATGCTGGACATACACCTATATTATTGGAAGCTAGAGATGTTTTAGGAGGAAAGGTC----------TTCATAATATATTTTGATATTTGATCATAAATTAGTTTATAT	102	17	del	N/A
1148	GCTGATGCTGGACATACACCTATATTATTGGAAGCTAGAGATGTTCTGGGAGGAAAGGTCTATATGTTAATTCATAATATATTTTTATATTCGATCATAAATTAGTTTATAT	GCTGATGCTGGACATACACCTATATGATTGGAAGCTAGAGATGTTTTAGGAGGAAAGGTC----------TTCATAATATATTTTTGTATTTGATCATAAATTAGTTTATAT	102	17	del	N/A
1149	GCTGATGCTGGACATACACCTATATTATTGGAAGCTAGAGATGTTCTGGGAGGAAAGGTCTATATGTTAATTCATAATATATTTTTATATTCGATCATAAATTAGTTTATAT	GCTGATGCTGGACATACACCTATATTATTGGAAGCTAAAGATGTTCTAGGAGGAAAGGTCTATAAGTTAATTCATAATATATTTTTATATTTGATCATAAATTAGTTTATAT	112	17	Sub	N/A
1150	GCTGATGCTGGACATACACCTATATTATTGGAAGCTAGAGATGTTCTGGGAGGAAAGGTCTATATGTTAATTCATAATATATTTTTATATTCGATCATAAATTAGTTTATAT	GCTGATGCTGGACATACACCTATATTATTGGAAGCTAGAGATGTTCTGGGAGGAAAGGTCTATATGTTAATTCATAATATATTTTTATATTCGATCATAAATTCGTTTATAT	112	17	Sub	N/A
1151	GCTGATGCTGGACATACACCTATATTATTGGAAGCTAGAGATGTTCTGGGAGGAAAGGTCTATATGTTAATTCATAATATATTTTTATA-TTCGATCATAAATTAGTTTATAT	GCTGATGCTGGACATACACCTATATTATTGGAAGCTAGAGATGTTTTAGGAGGAAAGGTC----------TTCATAATATATTTTTATATTTTGATTATAAATTAGTTTATAT	103	17	del	N/A
1152	GCTGATGCTGGACATACACCTATATTATTGGAAGCTAGAGATGTTCTGGGAGGAAAGGTCTATATGTTAATTCATAATATATTTTT--------ATATTCGATCATAAATTAGTTTATAT	GCTGATGCTGGACATACACCTATATTATTGGAAGCTAGAGATGTTCTGGGAGGAAAGGTCTATATGTTAATTCATAATA---TTTTCGAACACAATATTTGATCATAAGTTAGTTTATAT	117	17	Ins	N/A
1153	GCTGATGCTGGACATACACCTATATTATTGGAAGCTAGAGATGTTCTGGGAGGAAAGGTCTATATGTTAATTCATAATATATTTTTATA-TTCGATCATAAATTAGTTTATAT	GCTGATGCTGGACATACACCTATATTATTGGAAGATAGAGATGTTTTAGGAGGAAAGGTC----------TTCATAATATATTTTTATATTTTGATCATAAATTAGTTTATAT	103	17	del	N/A
1154	GCTGATGCTGGACATACACCTATATTATTGGAAGCTAGAGATGTTCTGGGAGGAAAGGTCTATA---TGTTAATTCATAATATATTTTT--------ATATTCGATCATAAATTAGTTTATAT	GCTGACGCTGGACATACACCTATATTATTGGAAGCTAGAGATGTTCTGGGGGGAAAGGTCTATATACTGTT-ATTCATAATA---TTTTCGAACACAATATTTGATCATAAATTAGTTTATAT	119	17	Ins	N/A
1155	GCTGATGCTGGACATACACCTATATTATTGGAAGCTAGAGATGTTCTGGGAGGAAAGGTCTATATGTTAATTCATAATATATTTTTATATTCGATCATAAATTAGTTTATAT	GCTGATGCTGGACATACACCTATATTATTGGAAGCGAGAGATGTGTTAGGAGGAAAGGTC----------TTCATAATATATTTTTATATTTGATCATAAATTAGTTTATAT	102	17	del	N/A
1156	GCTGATGCTGGACATACACCTATATTATTGGAAGCTAGAGATGTTCTGGGAGGAAAGGTCTATATGTTAATTCATAATATATTTTTATATTCGATCATAAATTAGTTTATAT	GCTAATGCTGGACATACACCTATATTATTGGAAGCTAGAGATGTTTTAGGAGGAAAGGTC----------TTCATAATATATTTTTGTATTTGATCATAAATTAGTTTATAT	102	17	del	N/A
1157	GCTGATGCTGGACATACACCTATATTATTGGAAGCTAGAGATGTTCTGGGAGGAAAGGTCTATATGTTAATTCATAATATATTTTTATATTCGATCATAAATTAGTTTATAT	GCTGATGCTGGACATACACCTATATTACTGGATGCTAGAGATGTTCTGGGAGGAAAGGTCTATATGTTAATTCATAATATATTTTTATATTCGATCATAAATTAGTTTATAT	112	17	Sub	N/A
1158	GCTGATGCTGGACATACACCTATATTATTGGAAGCTAGAGATGTTCTGGGAGGAAAGGTCTATATGTTAATTCATAATATATTTTTATATTCGATCATAAATTAGTTTATAT	GCTGAGGCTGGACATACACCTATATGATTGGAAGCTAGAGATGTTTTAGGAGGAAATGTC----------TTCATAATACATTTTTATATTTGATCATAAATTAGTTTATAT	102	17	del	N/A
1159	GCTGATGCTGGACATACACCTATATTATTGGAAGCTAGAGATGTTCTGGGAGGAAAGGTCTATATGTTAATTCATAATATATTTTTATATTCGATCATAAATTAGTTTATAT	GCTGATGCTGGACATACACCTATATTATTGGAAGCTAGAGATGTTTTAGGAGCAAAGGTC----------TTCATAATATATTTTTATATTTGATCATAAATTAGTTTATAT	102	16	del	N/A
1160	GCTGATGCTGGACATACACCTATATTATTGGAAGCTAGAGATGTTCTGGGAGGAAAGGTCTATATGTTAATTCATAATATATTTTTATATTCGATCATAAATTAGTTTATAT	GCTGATGCTGGACATACACCGATATTATTGGAAGCTAGAGATGTTTTAGGAGGAAAGGTC----------TTCATAATATATTTTTATATTTGATCATAAATTAGTTTATAT	102	16	del	N/A
1161	GCTGATGCTGGACATACACCTATATTATTGGAAGCTAGAGATGTTCTGGGAGGAAAGGTCTATA---TGTTAATTCATAATATATTTTT--------ATATTCGATCATAAATTAGTTTATAT	TCTGATGCTGGACATACACCTATATTATTGGAAGCTAGAGATGTTCTGGGGGGAAAGGTCTATATACTGTT-ATTCATAATA---TTTTCGAACACAATATTTGATCATAAATTAGTTTATAT	119	16	Ins	N/A
1162	GCTGATGCTGGACATACACCTATATTATTGGAAGCTAGAGATGTTCTGGGAGGAAAGGTCTATATGTTAATTCATAATATATTTTTATA-TTCGATCATAAATTAGTTTATAT	GCTGATGCTGGACATACACCTATATTATGGGAAGCTAGAGATGTTTTAGGAGGAAAGGTC----------TTCATAATATATTTTTATATTTTGATCATAAATTAGTTTATAT	103	16	del	N/A
1163	GCTGATGCTGGACATACACCTATATTATTGGAAGCTAGAGATGTTCTGGGAGGAAAGGTCTATATGTTAATTCATAATATATTTTTATATTCGATCATAAATTAGTTTATAT	GCTGATGCTGGACATACACCTATATTATTGGTAGTTAGAGATGTTTTAGGAGGAAATGTC----------TTCATAATACATTTTTATATTTGATCATAAATTAGTTTATAT	102	16	del	N/A
1164	GCTGATGCTGGACATACACCTATATTATTGGAAGCTAGAGATGTTCTGGGAGGAAAGGTCTATATGTTAATTCATAATATATTTTTATATTCGATCATAAATTAGTTTATAT	GCTGATGCTGGACATACACCTATATTATTGGAAGCTAGAGATGTTCTGGGGGGAAAGGTCTATATGTTAATTCATAATATATTTTTATATCCGATCATAAATTAGTTTATAT	112	16	Sub	N/A
1165	GCTGATGCTGGACATACACCTATATTATTGGAAGCTAGAGATGTTCTGGGAGGAAAGGTCTATA---TGTTAATTCATAATATATTTTT--------ATATTCGATCATAAATTAGTTTATAT	GCTGATGCCGGACATACACCTATATTATTGGAAGCTAGAGATGTTCTGGGGGGAAAGGTCTATATACTGTT-ATTCATAATA---TTTTCGAACACAATATTTGATCATAAATTAGTTTATAT	119	16	Ins	N/A
1166	GCTGATGCTGGACATACACCTATATTATTGGAAGCTAGAGATGTTCTGGGAGGAAAGGTCTATATGTTAATTCATAATATATTTTTATATTCGATCATAAATTAGTTTATAT	GCTGATGCTGGACATACACCTATATTATTGGAAGCTAGAGATGTTTTAGGAGGAAATGTC----------TTCATAATACATTTTTATATTTGATCATAAATTAGTTTTTAT	102	16	del	N/A
1167	GCTGATGCTGGACATACACCTATATTATTGGAAGCTAGAGATGTTCTGGGAGGAAAGGTCTATA---TGTTAATTCATAATATATTTTT--------ATATTCGATCATAAATTAGTTTATAT	GCTGATGTTGGACATACACCTATATTATTGGAAGCTAGAGATGTTCTGGGGGGAAAGGTCTATATACTGTT-ATTCATAATA---TTTTCGAACACAATATTTGATCATAAATTAGTTTATAT	119	16	Ins	N/A
1168	GCTGATGCTGGACATACACCTATATTATTGGAAGCTAGAGATGTTCTGGGAGGAAAGGTCTATA---TGTTAATTCATAATATATTTTT-------ATATTCGATCATAAATTAGTTTATAT	GCTGATGCTGGACATACACCTATATTATTGGAAGCTAGAGATGTTCTGGGGGGAAAGGTCTATATACTGTT-ATTCATA--ATATTTTTGAACACAATATTTGATCATAAATTAGTTTATAT	119	16	Ins	N/A
1169	GCTGATGCTGGACATACACCTATATTATTGGAAGCTAGAGATGTTCTGGGAGGAAAGGTCTATATGTTAATTCATAATATATTTTTATA-TTCGATCATAAATTAGTTTATAT	GCTGATGCTGGACCTACACCTATATTATTGGAAGCTAGAGATGTTTTAGGAGGAAAGGTC----------TTCATAATATATTTTTATATTTTGATCATAAATTAGTTTATAT	103	16	del	N/A
1170	GCTGATGCTGGACATACACCTATATTATTGGAAGCTAGAGATGTTCTGGGAGGAAAGGTCTATA---TGTTAATTCATAATATATTTTT--------ATATTCGATCATAAATTAGTTTATAT	GCTGATGCTGGACATACACCTATATTATTGGAAGCTAGAGATGCTCTGGGGGGAAAGGTCTATATACTGTT-ATTCATAATA---TTTTCGAACACAATATTTGATCATAAATTAGTTTATAT	119	16	Ins	N/A
1171	GCTGATGCTGGACATACACCTATATTATTGGAAGCTAGAGATGTTCTGGGAGGAAAGGTCTATATGTTAATTCATAATATATTTTTATATTCGATCATAAATTAGTTTATAT	GCTGATGCTGGACATCCACCTCTATTATTGGAAGCTAGAGATGTTCTGGGAGGAAAGGTCTATATGTTAATTCATAATATATTTTTATATTCGATCATAAATTAGTTTATAT	112	16	Sub	N/A
1172	GCTGATGCTGGACATACACCTATATTATTGGAAGCTAGAGATGTTCTGGGAGGAAAGGTCTATA---TGTTAATTCATAATATATTTTT--------ATATTCGATCATAAATTAGTTTATAT	GCTGATGCTGGACATACACCTATATTATTGGAAGCTAGAGATGTTCTGGGGGGAAAGGTCTATATACTGCT-ATTCATAATA---TTTTCGAACACAATATTTGATCATAAATTAGTTTATAT	119	16	Ins	N/A
1173	GCTGATGCTGGACATACACCTATATTATTGGAAGCTAGAGATGTTCTGGGAGGAAAGGTCTATATGTTAATTCATAATATATTTTTATATTCGATCATAAATTAGTTTATAT	GCTGATGCTGGACATACACCTATATTATTGGAAGCTAGAGATGTTTTAGGAGGGAATGTC----------TTCATAATATATTTTTATATTTGATCATAAATTAGTTTATAT	102	16	del	N/A
1174	GCTGATGCTGGACATACACCTATATTATTGGAAGCTAGAGATGTTCTGGGAGGAAAGGTCTATATGTTAATTCATAATATATTTTTATATTCGATCATAAATTAGTTTATAT	GCTGTTGCTGGACATACACCTATATTATTGGAAGCTAGAGATGTTTTAGGAGGAAAGGTC----------TTCATAATATATTTTTATATTTGATCATAAATTAGTTTATAT	102	16	del	N/A
1175	GCTGATGCTGGACATACACCTATATTATTGGAAGCTAGAGATGTTCTGGGAGGAAAGGTCTATATGTTAATTCATAATATATTTTTATATTCGATCATAAATTAGTTTATAT	GCTGATGTTGGACATACACCTATATTATTGGAAGCTAGAGATGTTTTAGGAGGAAATGTC----------TTCATAATATATTTTTATATTTGATCATAAATTAGTTTATAT	102	16	del	N/A
1176	GCTGATGCTGGACATACACCTATATTATTGGAAGCTAGAGATGTTCTGGGAGGAAAGGTCTATATGTTAATTCATAATATATTTTTATATTCGATCATAAATTAGTTTATAT	GCTGATGCTGGACATACACCTATATTATTGGAAGCTAGAGATGTTCTGGGAGGAAAGGTCTATATGTTAATTCATAATATATTTTTATATTCGATCATAAATTAGTTTATAA	112	16	Sub	N/A
1177	GCTGATGCTGGACATACACCTATATTATTGGAAGCTAGAGATGTTCTGGGAGGAAAGGTCTATATGTTAATTCATAATATATTTTTATATTCGATCATAAATTAGTTTATAT	GCTGATGCTGGACATACACCTATATTATTGGAAGCTAGAGATGTTTTAGGAGGAAATGTC----------TTCATAATACATTTTTATATTTGATCATAAATTAGTTAATAT	102	16	del	N/A
1178	GCTGATGCTGGACATACACCTATATTATTGGAAGCTAGAGATGTTCTGGGAGGAAAGGTCTATATGTTAATTCATAATATATTTTTATATTCGATCATAAATTAGTTTATAT	GCTGATGCTGGACATACACCTATATTATTGGAAGCTAGAGATGTTTTAGGAGGAAAGGTC----------TTCATAATATATTTTTATATTTGATCATAATTTAGTTTATAT	102	16	del	N/A
1179	GCTGATGCTGGACATACACCTATATTATTGGAAGCTAGAGATGTTCTGGGAGGAAAGGTCTATA---TGTTAATTCATAATATATTTTT--------ATATTCGATCATAAATTAGTTTATAT	GCTGATGCTGGACATACACCTATATTATTGGAAGCTAGAGATGTTCTGGGGGGAGAGGTCTATATACTGTT-ATTCATAATA---TTTTCGAACACAATATTTGATCATAAATTAGTTTATAT	119	16	Ins	N/A
1180	GCTGATGCTGGACATACACCTATATTATTGGAAGCTAGAGATGTTCTGGGAGGAAAGGTCTATATGTTAATTCATAATATATTTTTATATTCGATCATAAATTAGTTTATAT	GCTGATGCTGGACATACACCTATATTATTGGAAGCTAGAGATGTTTTACGAGGAAATGTC----------TTCATAATACATTTTTATATTTGATCATAAATTAGTTTATAT	102	16	del	N/A
1181	GCTGATGCTGGACATACACCTATATTATTGGAAGCTAGAGATGTTCTGGGAGGAAAGGTCTATA---TGTTAATTCATAATATATTTTT--------ATATTCGATCATAAATTAGTTTATAT	GCTGATGCTGGACATACACCTATATTATTGGAAGCTAGAGAGGTTCTGGGGGGAAAGGTCTATATACTGTT-ATTCATAATA---TTTTCGAACACAATATTTGATCATAAATTAGTTTATAT	119	16	Ins	N/A
1182	GCTGATGCTGGACATACACCTATATTATTGGAAGCTAGAGATGTTCTGGGAGGAAAGGTCTATATGTTAATTCATAATATATTTTTATATTCGATCATAAATTAGTTTATAT	GCTGATGCTGGACATACACCTATACTATTGGAAGCTAGAGATGTTCTGGGAGGAAAGGTC----------TTCATAATACATTTTTATATTTGATCATAAATTAGTTTATAT	102	16	del	N/A
1183	GCTGATGCTGGACATACACCTATATTATTGGAAGCTAGAGATGTTCTGGGAGGAAAGGTCTATA---TGTTAATTCATAATATATTTTT--------ATATTCGATCATAAATTAGTTTATAT	GCTGATGCTGGACATACACCTATATTAATGGAAGCTAGAGATGTTCTGGGGGGAAAGGTCTATATACTGTT-ATTCATAATA---TTTTCGAACACAATATTTGATCATAAATTAGTTTATAT	119	16	Ins	N/A
1184	GCTGATGCTGGACATACACCTATATTATTGGAAGCTAGAGATGTTCTGGGAGGAAAGGTCTATATGTTAATTCATAATATATTTTTATA-TTCGATCATAAATTAGTTTATAT	GATGATGCTGGACATACACCTATATTATTGGAAGCTAGAGATGTTTTAGGAGGAAAGGTC----------TTCATAATATATTTTTATATTTTGATCATAAATTAGTTTATAT	103	16	del	N/A
1185	GCTGATGCTGGACATACACCTATATTATTGGAAGCTAGAGATGTTCTGGGAGGAAAGGTCTATATGTTAATTCATAATATATTTTTATATTCGATCATAAATTAGTTTATAT	GCTGATGCTGGGCATACACCTATATTATTGGAAGCTAGAGATGTTTTAGGAGGAAATGTC----------TTCATAGTACATTTTTATATTTGATCATAAATTAGTTTATAT	102	16	del	N/A
1186	GCTGATGCTGGACATACACCTATATTATTGGAAGCTAGAGATGTTCTGGGAGGAAAGGTCTATATGTTAATTCATAATATATTTTTATATTCGATCATAAATTAGTTTATAT	GCTGATGCTGGACATACACCTATATTACTGGACGCTAGAGATGTTTTAGGAGGAAATGTC----------TTCATAATACATTTTTATATTTGATCATAAATTAGTTTATAT	102	16	del	N/A
1187	GCTGATGCTGGACATACACCTATATTATTGGAAGCTAGAGATGTTCTGGGAGGAAAGGTCTATATGTTAATTCATAATATATTTTTATATTCGATCATAAATTAGTTTATAT	GCTGATGCTGGACATACACCTATATTACTGGATGCTAGAGATGTTTTAGGAGGAAAGGTC----------TTCATAATATATTTTTATATTTGATCATAAATTAGTTTATAT	102	16	del	N/A
1188	GCTGATGCTGGACATACACCTATATTATTGGAAGCTAGAGATGTTCTGGGAGGAAAGGTCTATATGTTAATTCATAATATATTTTTATATTCGATCATAAATTAGTTTATAT	GCTGACGCTGGACATACACCTATATGATTGGAAGCTAGAGATGTTCTGGGAGGAAAGGTCTATATGTTAATTCATAATATATTTTTATATTCGATCATAAATTAGTTTATAT	112	16	Sub	N/A
1189	GCTGATGCTGGACATACACCTATATTATTGGAAGCTAGAGATGTTCTGGGAGGAAAGGTCTATATGTTAATTCATAATATATTTTTATATTCGATCATAAATTAGTTTATAT	GCTGATGCTGGACATACACCTATATTCTTGGACGCTAGAGATGTTTTAGGAGGAAAGGTC----------TTCATAATATATTTTTATATTTGATCATAAATTAGTTTATAT	102	15	del	N/A
1190	GCTGATGCTGGACATACACCTATATTATTGGAAGCTAGAGATGTTCTGGGAGGAAAGGTCTATATGTTAATTCATAATATATTTTTATATTCGATCATAAATTAGTTTATAT	GCTGATGCTGGACATACACCTATATTATTGGAAGCTAGAGATGTTTTAGGAGGAAATGTC----------GTCATAATACATTTTTATATTTGATCATAAATTAGTTTATAT	102	15	del	N/A
1191	GCTGATGCTGGACATACACCTATATTATTGGAAGCTAGAGATGTTCTGGGAGGAAAGGTCTATATGTTAATTCATAATATATTTTTATATTCGATCATAAATTAGTTTATAT	GCTGATGCTGGACATACACCTATATTATTGGAAGCTAGAGACGTTCTGGGAGGAAAGGTCTATATGTTAATTCATAATATATTTTTATATTCGACCATAAATTAGTTTATAT	112	15	Sub	N/A
1192	GCTGATGCTGGACATACACCTATATTATTGGAAGCTAGAGATGTTCTGGGAGGAAAGGTCTATATGTTAATTCATAATATATTTTTATATTCGATCATAAATTAGTTTATAT	GCTGATGCTGGACATACACCTATATGATGGGAAGCTAGAGATGTTTTAGGAGGAAAGGTC----------TTCATAATATATTTTTATATTTGATCATAAATTAGTTTATAT	102	15	del	N/A
1193	GCTGATGCTGGACATACACCTATATTATTGGAAGCTAGAGATGTTCTGGGAGGAAAGGTCTATATGTTAATTCATAATATATTTTTATATTCGATCATAAATTAGTTTATAT	GCTGATGCTGGACATACACCTATATTATTGGAAGCTAGAGATGTTTTAAGAGGAAATGTC----------TTCATAATATATTTTTATATTTGATCATAAATTAGTTTATAT	102	15	del	N/A
1194	GCTGATGCTGGACATACACCTATATTATTGGAAGCTAGAGATGTTCTGGGAGGAAAGGTCTATATGTTAATTCATAATATATTTTTATATTCGATCATAAATTAGTTTATAT	GCTGATGCTGGACATACACCAATATTATTGGAAGCTAGAGATGTTTTAGGAGGAAATGTC----------TTCATAATACATTTTTATATTTGATCATAAATTAGTTTATAT	102	15	del	N/A
1195	GCTGATGCTGGACATACACCTATATTATTGGAAGCTAGAGATGTTCTGGGAGGAAAGGTCTATATGTTAATTCATAATATATTTTTATA-TTCGATCATAAATTAGTTTATAT	GCTGATGCTGGACATACACCTATATTATTGGAAGCTCGAGATGTTTTAGGAGGAAAGGTC----------TTCATAATATATTTTTATATTTTGATCATAAATTAGTTTATAT	103	15	del	N/A
1196	GCTGATGCTGGACATA--------------------CACCTATATTATTGGAAGCTAGAGATGTTCTGGGAGGAAAGGTCTATATGTTAATTCATAATATATTTTTATATTCGATCATAAATTAGTTTATAT	GCTGATGCTGGACATACACCGCTGATGCTGGACAAGCACCTATATTATTGGAAGCTAGAGATGTTTTAGGAGGAAAGGTC----------TTCATAATATATTTTTATATTTGATCATAAATTAGTTTATAT	122	15	Ins	N/A
1197	#NAME?	GCTGATGCTGGACATACACCGCTGATGCTGGACATACACCTATATTATTGGAAGCTAGAGATGTTTTAGGAGGAAAGGTC----------TTCATAATATATTTTTATATTCGATCATAAATTAGTTTATAT	122	15	Ins	N/A
1198	GCTGATGCTGGACATACACCTATATTATTGGAAGCTAGAGATGTTCTGGGAGGAAAGGTCTATATGTTAATTCATAATATATTTTTATATTCGATCATAAATTAGTTTATAT	GCTGATGCTGGACATACACCTATATTCTTGGACGCTAGAGATGTTCTGGGAGGAAAGGTCTATATGTTAATTCATAATATATTTTTATATTCGATCATAAATTAGTTTATAT	112	15	Sub	N/A
1199	GCTGATGCTGGACATACACCTATATTATTGGAAGCTAGAGATGTTCTGGGAGGAAAGGTCTATATGTTAATTCATAATATATTTTTATATTCGATCATAAATTAGTTTATAT	GCTGATGCTGGACATACACCTATATTATTGGAAGCTAGAGATGTTTTAGGAGGAAATGTC----------TTCATAATATATTTTTATATTTGATCATGAATTAGTTTATAT	102	15	del	N/A
1200	GCTGATGCTGGACATACACCTATATTATTGGAAGCTAGAGATGTTCTGGGAGGAAAGGTCTATA---TGTTAATTCATAATATATTTTT--------ATATTCGATCATAAATTAGTTTATAT	GCTGATGCTGGACATACACCTATATTATTGGAAGCTATAGATGTTCTGGGGGGAAAGGTCTATATACTGTT-ATTCATAATA---TTTTCGAACACAATATTTGATCATAAATTAGTTTATAT	119	15	Ins	N/A
1201	GCTGATGCTGGACATACACCTATATTATTGGAAGCTAGAGATGTTCTGGGAGGAAAGGTCTATAT----GTTAATTCATAATATATTTTT--------ATATTCGATCATAAATTAGTTTATAT	GCTGATGCTGGACATACACCTATATTATTGGAAGCTAGAGATGTTCTGGGGGGAAAGGTCTATATACTGGT--ATTCATAATA---TTTTCGAACACAATATTTGATCATAAATTAGTTTATAT	119	15	Ins	N/A
1202	GCTGATGCTGGACATACACCTATATTATTGGAAGCTAGAGATGTTCTGGGAGGAAAGGTCTATATGTTAATTCATAATATATTTTTATATTCGATCATAAATTAGTTTATAT	GCTGATGCTTGACATACACCTATATTATTGGAAGCTAGAGATGTTTTAGGAGGAAATGTC----------TTCATAATATATTTTTATATTTGATCATAAATTAGTTTATAT	102	15	del	N/A
1203	GCTGATGCTGGACATACACCTATATTATTGGAAGCTAGAGATGTTCTGGGAGGAAAGGTCTATATGTTAATTCATAATATATTTTTATATTCGATCATAAATTAGTTTATAT	GCTGAGGCTGGACATACACCTATATTATTGGAAGCTAGAGATGTTTTAGGAGGAAAGGTC----------TTCATAATACATTTTTATATTTGATCATAAATTAGTTTATAT	102	15	del	N/A
1204	GCTGATGCTGGACATACACCTATATTATTGGAAGCTAGAGATGTTCTGGGAGGAAAGGTCTATATGTTAATTCATAATATATTTTTATA-TTCGATCATAAATTAGTTTATAT	GCTGATGCTGGACATACACCTATATTCTTGGAAGCTAGAGATGTTTTAGGAGGAAAGGTC----------TTCATAATATATTTTTATATTTTGATCATAAATTAGTTTATAT	103	15	del	N/A
1205	GCTGATGCTGGACATACACCTATATTATTGGAAGCTAGAGATGTTCTGGGAGGAAAGGTCTATA---TGTTAATTCATAATATATTTTT--------ATATTCGATCATAAATTAGTTTATAT	GCTGATGCTGGACATACACCTATATTATTGGAAGCTAGAGATGTTCTGGGGGGAAAGGTCTATATACTGTT-ATTCATAATA---TTTTCGAACACAATGTTTGATCATAAATTAGTTTATAT	119	15	Ins	N/A
1206	GCTGATGCTGGACATACACCTATATTATTGGAAGCTAGAGATGTTCTGGGAGGAAAGGTCTATATGTTAATTCATAATATATTTTTATATTCGATCATAAATTAGTTTATAT	GCTGATGCTGGACATACACCTATATTATTGGAAGCTAGAGATGTTTTAGGAGGAAATGTC----------TTCATAATATATTTCTATATTTGATCATAAATTAGTTTATAT	102	15	del	N/A
1207	GCTGATGCTGGACATACACCTATATTATTGGAAGCTAGAGATGTTCTGGGAGGAAAGGTCTATATGTTAATTCATAATATATTTTTATA-TTCGATCATAAATTAGTTTATAT	GCTGATGCTGGACATACACCTATCTTATTGGAAGCTAGAGATGTTTTAGGAGGAAAGGTC----------TTCATAATATATTTTTATATTTTGATCATAAATTAGTTTATAT	103	15	del	N/A
1208	GCTGATGCTGGACATACACCTATATTATTGGAAGCTAGAGATGTTCTGGGAGGAAAGGTCTATA---TGTTAATTCATAATATATTTTT--------ATATTCGATCATAAATTAGTTTATAT	GCTGATGCTGGACATACACCTATATTATTGGAAGCTAGAGATGTTCTGGGGGGAAAAGTCTATATACTGTT-ATTCATAATA---TTTTCGAACACAATATTTGATCATAAATTAGTTTATAT	119	15	Ins	N/A
1209	GCTGATGCTGGACATACACCTATATTATTGGAAGCTAGAGATGTTCTGGGAGGAAAGGTCTATATGTTAATTCATAATATATTTTTATATTCGATCATAAATTAGTTTATAT	GCTGATGCTGGACATACACCTATATTATTGGAAGCTAGAGAAGTTCTGGGAGGAAAGGTCTATATGTTAATTCATAATATATTTTTATATTCGATCATAAATTAGTTTATAT	112	15	Sub	N/A
1210	GCTGATGCTGGACATACACCTATATTATTGGAAGCTAGAGATGTTCTGGGAGGAAAGGTCTATATGTTAATTCATAATATATTTTTATATTCGATCATAAATTAGTTTATAT	GCTGATGCTGGACTTACACCTATATTATTGGAAGCTAGAGATGTTTTAGGAGGAAAGGTCTATATGTTAATTCATAATATATTTTTATATTCGATCATAAATTAGTTTATAT	112	15	Sub	N/A
1211	GCTGATGCTGGACATACACCTATATTATTGGAAGCTAGAGATGTTCTGGGAGGAAAGGTCTATATGTTAATTCATAATATATTTTTATATTCGATCATAAATTAGTTTATAT	GCAGATGCTGGACATACACCTATATTATTGGAAGCTAGAGATGTTTTAGGAGGAAAGGTC----------TTCATAATATATTTTTATATTTGATCATAAATTAGTTTATAT	102	15	del	N/A
1212	GCTGATGCTGGACATACACCTATATTATTGGAAGCTAGAGATGTTCTGGGAGGAAAGGTCTATA---TGTTAATTCATAATATATTTTT--------ATATTCGATCATAAATTAGTTTATAT	GCTGATGCTGGACATACACCTATATTATTGGAAGCTAGATATGTTCTGGGGGGAAAGGTCTATATACTGTT-ATTCATAATA---TTTTCGAACACAATATTTGATCATAAATTAGTTTATAT	119	15	Ins	N/A
1213	GCTGATGCTGGACATACACCTATATTATTGGAAGCTAGAGATGTTCTGGGAGGAAAGGTCTATATGTTAATTCATAATATATTTTTATATTCGATCATAAATTAGTTTATAT	GCTGATGCTGGACATACACCTATACTATTGGAGGCTAGAGATGTTTTAGGAGGAAAGGTC----------TTCATAATATGTTTTTATATTTGATCATAAATTAGTTTATAT	102	15	del	N/A
1214	GCTGATGCTGGACATACACCTATATTATTGGAAGCTAGAGATGTTCTGGGAGGAAAGGTCTATA---TGTTAATTCATAATATATTTTT--------ATATTCGATCATAAATTAGTTTATAT	GCTGATGCTGGACATACACCTATATTATTGGAAGCTAGAGATGTTCTGGGGGGAAAGGTCTATATACTGTT-ATTCATAATA---TTTTCGGACACAATATTTGATCATAAATTAGTTTATAT	119	15	Ins	N/A
1215	GCTGATGCTGGACATACACCTATATTATTGGAAGCTAGAGATGTTCTGGGAGGAAAGGTCTATATGTTAATTCATAATATATTTTTATATTCGATCATAAATTAGTTTATAT	GCTGATGCTGGACATACACCTATATTATTGGAAGCTAGAGATGTTTTAGGAGGAAATGTC----------TTCATAATACATTTTTATATTTGATCATAAATTAGTATATAT	102	15	del	N/A
1216	GCTGATGCTGGACATACACCTATATTATTGGAAGCTAGAGATGTTCTGGGAGGAAAGGTCTATATGTTAATTCATAATATATTTTTATATTCGATCATAAATTAGTTTATAT	GCTGATGCTGGACATACACCTATATTATTGGAAGCTAGAGATGTTTTAGGAGGACAGGTC----------TTCATAATATATTTTTATATTTGATCATAAATTAGTTTATAT	102	15	del	N/A
1217	GCTGATGCTGGACATACACCTATATTATTGGAAGCTAGAGATGTTCTGGGAGGAAAGGTCTATATGTTAATTCATAATATATTTTTATATTCGATCATAAATTAGTTTATAT	GCTGATGCTGGACATACACCTATATTATTGGAAGCAAGAGATGTTTTAGGAGGAAATGTC----------TTCATAATATATTTTTATATTTGATCATAAATTAGTTTATAT	102	15	del	N/A
1218	GCTGATGCTGGACATACACCTATATTATTGGAAGCTAGAGATGTTCTGGGAGGAAAGGTCTATA---TGTTAATTCATAATATATTTTT--------ATATTCGATCATAAATTAGTTTATAT	GCTGATGCTGGACATACACTTATATTATTGGAAGCTAGAGATGTTCTGGGGGGAAAGGTCTATATACTGTT-ATTCATAATA---TTTTCGAACACAATATTTGATCATAAATTAGTTTATAT	119	15	Ins	N/A
1219	GCTGATGCTGGACATACACCTATATTATTGGAAGCTAGAGATGTTCTGGGAGGAAAGGTCTATATGTTAATTCATAATATATTTTTATATTCGATCATAAATTAGTTTATAT	GCTGATGCTGGACATACACCTATACTATTGGAATCTAGAGATGTTTTAGGAGGAAAGGTC----------TTCATAATATGTTTTTATATTTGATCATAAATTAGTTTATAT	102	15	del	N/A
1220	GCTGATGCTGGACATACACCTATATTATTGGAAGCTAGAGATGTTCTGGGAGGAAAGGTCTATATGTTAATTCATAATATATTTTTATATTCGATCATAAATTAGTTTATAT	GCTGATGCTGGACATACACCTATCTTATTGGAAGCTAGCGATGTTCTGGGAGGAAAGGTCTATATGTTAATTCATAATATATTTTTATATTCGATCATAAATTAGTTTATAT	112	15	Sub	N/A
1221	GCTGATGCTGGACATACACCTATATTATTGGAAGCTAGAGATGTTCTGGGAGGAAAGGTCTATATGTTAATTCATAATATATTTTTATA-TTCGATCATAAATTAGTTTATAT	GCTGATGCTGGACATACACCTATATTAATGGAAGCTAGAGATGTTTTAGGAGGAAAGGTC----------TTCATAATATATTTTTATATTTTGATCATAAATTAGTTTATAT	103	15	del	N/A
1222	GCTGATGCTGGACATACACCTATATTATTGGAAGCTAGAGATGTTCTGGGAGGAAAGGTCTATATGTTAATTCATAATATATTTTTATATTCGATCATAAATTAGTTTATAT	GATGATGCTGGACATACACCTATATTATTGGAAGCTAGAGATGTTTTAGGAGGAAATGTC----------TTCATAATATATTTTTATATTTGATCATAAATTAGTTTATAT	102	15	del	N/A
1223	GCTGATGCTGGACATACACCTATATTATTGGAAGCTAGAGATGTTCTGGGAGGAAAGGTCTATATGTTAATTCATAATATATTTTTATATTCGATCATAAATTAGTTTATAT	GCTCATGCTGGACATACACCTATACTATTGGAAGCTAGAGATGTTTTAGGAGGAAAGGTC----------TTCATAATATGTTTTTATATTTGATCATAAATTAGTTTATAT	102	15	del	N/A
1224	GCTGATGCTGGACATACACCTATATTATTGGAAGCTAGAGATGTTCTGGGAGGAAAGGTCTATATGTTAATTCATAATATATTTTTATATTCGATCATAAATTAGTTTATAT	GCTGATGCTGGACATACACCTATATTAATGGATGCTAGAGATGTTCTGGGAGGAAAGGTCTATATGTTAATTCATAATATATTTTTATATTCGATCATAAATTAGTTTATAT	112	15	Sub	N/A
1225	GCTGATGCTGGACATACACCTATATTATTGGAAGCTAGAGATGTTCTGGGAGGAAAGGTCTATATGTTAATTCATAATATATTTTTATATTCGATCATAAATTAGTTTATAT	GCTGATGCTGGACATACACCTATATTACTGGAGGCTAGAGATGTTTTAGGAGGAAAGGTC----------TTCATAATATATTTTTATATTTGATCATAAATTAGTTTATAT	102	15	del	N/A
1226	GCTGATGCTGGACATACACCTATATTATTGGAAGCTAGAGATGTTCTGGGAGGAAAGGTCTATATGTTAATTCATAATATATTTTTATATTCGATCATAAATTAGTTTATAT	GCTGACGCTGGACATACACCTATATGATTGGAAGCTAGAGATGTTTTAGGAGGAAATGTC----------TTCATAATACATTTTTATATTTGATCATAAATTAGTTTATAT	102	15	del	N/A
1227	GCTGATGCTGGACATACACCTATATTATTGGAAGCTAGAGATGTTCTGGGAGGAAAGGTCTATA---TGTTAATTCATAATATATTTTT--------ATATTCGATCATAAATTAGTTTATAT	GCTGATGCTGGACATACACCTATATTATTGGAAGCTAGAGATGTTCTGGGGTGAAAGGTCTATATACTGTT-ATTCATAATA---TTTTCGAACACAATATTTGATCATAAATTAGTTTATAT	119	14	Ins	N/A
1228	GCTGATGCTGGACATACACCTATATTATTGGAAGCTAGAGATGTTCTGGGAGGAAAGGTCTATATGTTAATTCATAATATATTTTTATATTCGATCATAAATTAGTTTATAT	GCTGATGCTGGACATACACCTATATTATTGGAAGCTAGAGATGTTTTGGGAGGAAATGTC----------TTCATAATATATTTTTATATTTGATCATAAATTAGTTTATAT	102	14	del	N/A
1229	GCTGATGCTGGACATACACCTATATTATTGGAAGCTAGAGATGTTCTGGGAGGAAAGGTCTATATGTTAATTCATAATATATTTTTATATTCGATCATAAATTAGTTTATAT	GCTGATGCTGGACATACACCTATATTATTGGAAGCTAGAGATGTTTTAGGAGGAAAGGTC----------TTCATAATATATTTTTATAGTTGATCATAAATTAGTTTATAT	102	14	del	N/A
1230	GCTGATGCTGGACATACACCTATATTATTGGAAGCTAGAGATGTTCTGGGAGGAAAGGTCTATATGTTAATTCATAATATATTTTTATATTCGATCATAAATTAGTTTATAT	GCTGATGCTGGATATACACCTATATTATTGGAAGCTAGAGATGTTTTAGGAGGAAAGGTC----------TTCATAATACATTTTTATATTTGATCATAAATTAGTTTATAT	102	14	del	N/A
1231	GCTGATGCTGGACATACACCTATATTATTGGAAGCTAGAGATGTTCTGGGAGGAAAGGTCTATA---TGTTAATTCATAATATATTTTT--------ATATTCGATCATAAATTAGTTTATAT	GCTGATGCTGGACATACACCTATATAATTGGAAGCTAGAGATGTTCTGGGGGGAAAGGTCTATATACTGTT-ATTCATAATA---TTTTCGAACACAATATTTGATCATAAATTAGTTTATAT	119	14	Ins	N/A
1232	GCTGATGCTGGACATACACCTATATTATTGGAAGCTAGAGATGTTCTGGGAGGAAAGGTCTATATGTTAATTCATAATATATTTTTATATTCGATCATAAATTAGTTTATAT	GCTGATGCTGGACATACACCTATATTATTGGAAGCTAGAGATGTTCTGGGAGGAAAGGTCTATATGTTAATTCATAATATATTTTTATATTCGATCTTAAATTAGTTTATAT	112	14	Sub	N/A
1233	GCTGATGCTGGACATACACCTATATTATTGGAAGCTAGAGATGTTCTGGGAGGAAAGGTCTATATGTTAATTCATAATATATTTTTATATTCGATCATAAATTAGTTTATAT	GCTGATGCTGGACATACACCTATATTCTTGGACGCTAGAGATGTTTTAGGAGGAAATGTC----------TTCATAATACATTTTTATATTTGATCATAAATTAGTTTATAT	102	14	del	N/A
1234	#NAME?	GCTGATGCTGGACATACACCGCTGATGCTGGACATACACCGCTGATGCTGGACATACACCGCTGATGCTGGACATACACCGCTGATGCTGGACATACACCTATATTATTGGAAGCTAGAGATGTTTTAGGAGGAAAGGTC----------TTCATAATATATTTTTATATTTGATCATAAATTAGTTTATAT	182	14	Ins	N/A
1235	GCTGATGCTGGACATACACCTATATTATTGGAAGCTAGAGATGTTCTGGGAGGAAAGGTCTATATGTTAATTCATAATATATTTTTATATTCGATCATAAATTAGTTTATAT	GCTGATGCTGGACATACACCTATATTATTGGAAGCTAGAGATGTTTTAGGAGGAAATGTC----------TTCATAATATATTTTTACATTTGATCATAAATTAGTTTATAT	102	14	del	N/A
1236	GCTGATGCTGGACATACACCTATATTATTGGAAGCTAGAGATGTTCTGGGAGGAAAGGTCTATATGTTAATTCATAATATATTTTTATA-TTCGATCATAAATTAGTTTATAT	GCTGATGCTGGACATACACCTATATTATTGGAAGCTAGAGATGTTCTGGGGGGAAAGGTC----------TTCATAATATATTTTTATATTTTGATCATAAATTAGTTTATAT	103	14	del	N/A
1237	GCTGATGCTGGACATACACCTATATTATTGGAAGCTAGAGATGTTCTGGGAGGAAAGGTCTATA---TGTTAATTCATAATATATTTTT--------ATATTCGATCATAAATTAGTTTATAT	GCTGATGCTGGACATACACCTATATTATTGGAAGCTAGAGATGTTCTGGGGGGAAAGGTCTATATACTGTT-ATTCATAATA---TTCTCGAACACAATATTTGATCATAAATTAGTTTATAT	119	14	Ins	N/A
1238	GCTGATGCTGGACATACACCTATATTATTGGAAGCTAGAGATGTTCTGGGAGGAAAGGTCTATATGTTAATTCATAATATATTTTTATATTCGATCATAAATTAGTTTATAT	GCTGATGCTGGACATACACCTATATTATTGGAAGCTAGAGAAGTTTTAGGAGGAAAGGTC----------TTCATAATATATTTTTATATTTGATCATAAATTAGTTTATAT	102	14	del	N/A
1239	GCTGATGCTGGACATACACCTATATTATTGGAAGCTAGAGATGTTCTGGGAGGAAAGGTCTATATGTTAATTCATAATATATTTTTATATTCGATCATAAATTAGTTTATAT	GCTGATGCTGGACATACACCTATATTATTGGAAGCTAGAGATGTTTTTGGAGGAAAGGTC----------TTCATAATATATTTTTATATTTGATCATAAATTAGTTTATAT	102	14	del	N/A
1240	GCTGATGCTGGACATACACCTATATTATTGGAAGCTAGAGATGTTCTGGGAGGAAAGGTCTATATGTTAATTCATAATATATTTTTATATTCGATCATAAATTAGTTTATAT	GCTGATGCTGGACATACACCTATATTATTGGAAGCTAGAGATGTTCTGAGAGGAAAGGTCTATATGTTAGTTCATAATATAGTTTTATATTCGATCATAAATTAGTTTATAT	112	14	Sub	N/A
1241	GCTGATGCTGGACATACACCTATATTATTGGAAGCTAGAGATGTTCTGGGAGGAAAGGTCTATA---TGTTAATTCATAATATATTTTT--------ATATTCGATCATAAATTAGTTTATAT	GCTGATGCTGGACATACACCTCTATTATTGGAAGCTAGAGATGTTCTGGGGGGAAAGGTCTATATACTGTT-ATTCATAATA---TTTTCGAACACAATATTTGATCATAAATTAGTTTATAT	119	14	Ins	N/A
1242	GCTGATGCTGGACATACACCTATATTATTGGAAGCTAGAGATGTTCTGGGAGGAAAGGTCTATATGTTAATTCATAATATATTTTTATATTCGATCATAAATTAGTTTATAT	GCTGATGCTGGACATACACCTATATTATTGGAAGCTAGAGATGTTTTAGGAGGAAAGGTC----------TTCATAATATATTTTTATATTTGATCATAAATTAGTTTAAAT	102	14	del	N/A
1243	GCTGATGCTGGACATACACCTATATTATTGGAAGCTAGAGATGTTCTGGGAGGAAAGGTCTATA---TGTTAATTCATAATATATTTTT--------ATATTCGATCATAAATTAGTTTATAT	GCTGATGCTGGACATACACCTATATTATTGGAAGCTAGAGATGTTCTGGGGGGAAAGGTCTATATACTGTT-ATTCATAATA---TTTTCGAACACAATCTTTGATCATAAATTAGTTTATAT	119	14	Ins	N/A
1244	GCTGATGCTGGACATACACCTATATTATTGGAAGCTAGAGATGTTCTGGGAGGAAAGGTCTATATGTTAATTCATAATATATTTTTATATTCGATCATAAATTAGTTTATAT	GCTGATGCTGGACATACACCTATATTATTGGAAGCTAGAGATGTTCTGGGAGGAAAGGTCTATATGTTTATTCATAATATATTTTTATATTCGATCATAAATTAGTTTATAT	112	14	Sub	N/A
1245	GCTGATGCTGGACATACACCTATATTATTGGAAGCTAGAGATGTTCTGGGAGGAAAGGTCTATATGTTAATTCATAATATATTTTTATATTCGATCATAAATTAGTTTATAT	GCTGATGCTGGACATACACCTATATTATTGGAAGCTAGAGATGTTTTAGGAGGA---------ATGT--CTTCATAATACATTTTTATATTTGATCATAAATTAGTTTATAT	101	14	del	N/A
1246	GCTGATGCTGGACATACACCTATATTATTGGAAGCTAGAGATGTTCTGGGAGGAAAGGTCTATATGTTAATTCATAATATATTTTTATATTCGATCATAAATTAGTTTATAT	GCTGAGGCTGGACATACACCTATATTATTGGAAGCTAGAGATGTTTTAGGAGGAAAGGTCTATATGTTAATTCATAATATATTTTTATATTCGATCATAAATTAGTTTATAT	112	14	Sub	N/A
1247	GCTGATGCTGGACATACACCTATATTATTGGAAGCTAGAGATGTTCTGGGAGGAAAGGTCTATA---TGTTAATTCATAATATATTTTT--------ATATTCGATCATAAATTAGTTTATAT	GCTGATGCTGGACATACACCTATATTATTGGAAGCTAGAGATGTTCTGGGGGGAAAGGTCTATATACTGTT-ATTCATGATA---TTTTCGAACACAATATTTGATCATAAATTAGTTTATAT	119	14	Ins	N/A
1248	GCTGATGCTGGACATACACCTATATTATTGGAAGCTAGAGATGTTCTGGGAGGAAAGGTCTATATGTTAATTCATAATATATTTTTATATTCGATCATAAATTAGTTTATAT	GCTGAAGCTGGACATACACCTATATTATTGGAAGCTAGAGATGTTTTAGGAGGAAATGTC----------TTCATAATATATTTTTATATTTGATCATAAATTAGTTTATAT	102	14	del	N/A
1249	GCTGATGCTGGACATACACCTATATTATTGGAAGCTAGAGATGTTCTGGGAGGAAAGGTCTATATGTTAATTCATAATATATTTTTATA-TTCGATCATAAATTAGTTTATAT	GCTGATGCTGGACATACACCTATATTATTGGAAGCTAGAGATGTTTTAGGAGGAAAGGTC----------TTCATAATACATTTTTATATTTTGATCATAAATTAGTTTATAT	103	14	del	N/A
1250	GCTGATGCTGGACATACACCTATATTATTGGAAGCTAGAGATGTTCTGGGAGGAAAGGTCTATATGTTAATTCATAATATATTTTTATATTCGATCATAAATTAGTTTATAT	GCTTATGCTGGACATACACCTATATTATTGGAAGCTAGAGATGTTTTAGGAGGAAAGGTC----------TTCATAATACATTTTTATATTTGATCATAAATTAGTTTATAT	102	14	del	N/A
1251	GCTGATGCTGGACATACACCTATATTATTGGAAGCTAGAGATGTTCTGGGAGGAAAGGTCTATATGTTAATTCATAATATATTTTTATATTCGATCATAAATTAGTTTATAT	GCTGATGCTGGACATACACCTATATTATTGGAAGCTAGAGATGTTTTAGGAGGAAATGTC----------TTCATAATACATTTTTATATTTGAGCATAAATTAGTTTATAT	102	14	del	N/A
1252	GCTGATGCTGGACATACACCTATATTATTGGAAGCTAGAGATGTTCTGGGAGGAAAGGTCTATA---TGTTAATTCATAATATATTTTT--------ATATTCGATCATAAATTAGTTTATAT	GCTGATGCTGGACATACACCTATATTATTGGAAGCTAGAGATGTTCTGGGGGTAAAGGTCTATATACTGTT-ATTCATAATA---TTTTCGAACACAATATTTGATCATAAATTAGTTTATAT	119	14	Ins	N/A
1253	GCTGATGCTGGACATACACCTATATTATTGGAAGCTAGAGATGTTCTGGGAGGAAAGGTCTATA---TGTTAATTCATAATATATTTTT--------ATATTCGATCATAAATTAGTTTATAT	GCCGATGCTGGACATACACCTATATTATTGGAAGCTAGAGATGTTCTGGGGGGAAAGGTCTATATACTGTT-ATTCATAATA---TTTTCGAACACAATATTTGATCATAAATTAGTTTATAT	119	14	Ins	N/A
1254	GCTGATGCTGGACATACACCTATATTATTGGAAGCTAGAGATGTTCTGGGAGGAAAGGTCTATATGTTAATTCATAATATATTTTTATATTCGATCATAAATTAGTTTATAT	GCTGATGCTGGACATACACCTATATTATTGGAAGCTAGAGATGTGTTAGGAGGAAAGGTC----------TTCATAATATATTTTTGTATTTGATCATAAATTAGTTTATAT	102	14	del	N/A
1255	GCTGATGCTGGACATACACCTATATTATTGGAAGCTAGAGATGTTCTGGGAGGAAAGGTCTATATGTTAATTCATAATATATTTTTATATTCGATCATAAATTAGTTTATAT	GCTGATGCGGGACATACACCTATATTATTGGAAGCTAGAGATGTTTTAGGAGGAAAGGTC----------TTCATAATATATTTTTGTATTTGATCATAAATTAGTTTATAT	102	14	del	N/A
1256	GCTGATGCTGGACATACACCTATATTATTGGAAGCTAGAGATGTTCTGGGAGGAAAGGTCTATATGTTAATTCATAATATATTTTTATATTCGATCATAAATTAGTTTATAT	GCTGATGCTGGACATACACCTATATTATTGGAAGCTAGAGATGTTCTGGGAGGAAAGGTCAATATGTTAATTCATAATATATTTTTATATTCGATCATAAATTAGTTTATAT	112	14	Sub	N/A
1257	GCTGATGCTGGACATACACCTATATTATTGGAAGCTAGAGATGTTCTGGGAGGAAAGGTCTATATGTTAATTCATAATATATTTTTATATTCGATCATAAATTAGTTTATAT	GCTGATGCTGGATATACACCTATATTATTGGAAGCTAGAGATGTTTTAGGAGGAAAGGTC----------TTCATAATATATTTTTATATTCGATCATAAATTAGTTTATAT	102	14	del	N/A
1258	GCTGATGCTGGACATACACCTATATTATTGGAAGCTAGAGATGTTCTGGGAGGAAAGGTCTATA---TGTTAATTCATAATATATTTTT--------ATATTCGATCATAAATTAGTTTATAT	GCTGATGCTGGACATACACCTATATTATTGGAAGGTAGAGATGTTCTGGGGGGAAAGGTCTATATACTGTT-ATTCATAATA---TTTTCGAACACAATATTTGATCATAAATTAGTTTATAT	119	14	Ins	N/A
1259	GCTGATGCTGGACATACACCTATATTATTGGAAGCTAGAGATGTTCTGGGAGGAAAGGTCTATATGTTAATTCATAATATATTTTTATATTCGATCATAAATTAGTTTATAT	GGTGATGCTGGACATACACCTATATTATTGGAAGCTAGAGATGTTTTAGGAGGAAAGGTC----------TTCATAATATATTTTTGTATTTGATCATAAATTAGTTTATAT	102	14	del	N/A
1260	GCTGATGCTGGACATACACCTATATTATTGGAAGCTAGAGATGTTCTGGGAGGAAAGGTCTATATGTTAATTCATAATATATTTTTATATTCGATCATAAATTAGTTTATAT	GCTGATGCTGGACATACACTTATATTATTGGAAGCTAGAGATGTTTTAGGAGGAAATGTC----------TTCATAATATATTTTTATATTTGATCATAAATTAGTTTATAT	102	14	del	N/A
1261	GCTGATGCTGGACATACACCTATATTATTGGAAGCTAGAGATGTTCTGGGAGGAAAGGTCTATATGTTAATTCATAATATATTTTTATATTCGATCATAAATTAGTTTATAT	GCTGATGCTGGACATACACCTATAGTATTGGAAGCTAGAGATGTTTTAGGAGGAAATGTC----------TTCATAATATATTTTTATATTTGATCATAAATTAGTTTATAT	102	14	del	N/A
1262	GCTGATGCTGGACATACACCTATATTATTGGAAGCTAGAGATGTTCTGGGAGGAAAGGTCTATATGTTAATTCATAATATATTTTTATATTCGATCATAAATTAGTTTATAT	GCTGATGCTGGACATACACCTATATTATTGGAAGCTAGAGATGTTCTGGGAGCAAAGGTCTATATGTTAATTCATAATATATTTTTATATTCGATCATAAATTAGTTTATAT	112	14	Sub	N/A
1263	GCTGATGCTGGACATACACCTATATTATTGGAAGCTAGAGATGTTCTGGGAGGAAAGGTCTATATGTTAATTCATAATATATTTTTATATTCGATCATAAATTAGTTTATAT	GCTGATGCTGGGCATACACCTATATTATTGGAAGCTAGAGATGTTCTGGGAGGAAAGGTCTATATGTTAATTCATAATATATTTTTATATTCGATCATAAATTAGTTTATCT	112	14	Sub	N/A
1264	GCTGATGCTGGACATACACCTATATTATTGGAAGCTAGAGATGTTCTGGGAGGAAAGGTCTATATGTTAATTCATAATATATTTTTATATTCGATCATAAATTAGTTTATAT	GCTGATGCTGGACATACACCTATATTATTGGAAGTTAGAGATGTCTTAGGAGGAAATGTC----------TTCATAATACATTTTTATATTTGATCATAAATTAGTTTATAT	102	14	del	N/A
1265	GCTGATGCTGGACATACACCTATATTATTGGAAGCTAGAGATGTTCTGGGAGGAAAGGTCTATATGTTAATTCATAATATATTTTTATATTCGATCATAAATTAGTTTATAT	GCTGATGCTGGACATACACCTATATTATTGGAAGGTAGAGATGTCTTAGGAGGAAATGTC----------TTCATAATACATTTTTATATTTGATCATAAATTAGTTTATAT	102	14	del	N/A
1266	GCTGATGCTGGACATACACCTATATTATTGGAAGCTAGAGATGTTCTGGGAGGAAAGGTCTATATGTTAATTCATAATATATTTTTATATTCGATCATAAATTAGTTTATAT	GGTGATGCTGGACATACATCTATATTATTGGAAGCTAGAGATGTTTTAGGAGGAAATGTC----------TTCATAATACATTTTTATATTTGATCATAAATTAGTTTATAT	102	14	del	N/A
1267	GCTGATGCTGGACATACACCTATATTATTGGAAGCTAGAGATGTTCTGGGAGGAAAGGTCTATATGTTAATTCATAATATATTTTTATATTCGATCATAAATTAGTTTATAT	GGTGATGCTGGACATACATCTATATTATTGGAAGCTAGAGATGTTCTGGGAGGAAAGGTCTATATGTTAATTCATAATATATTTTTATATTCGATCATAAATTAGTTTATAT	112	14	Sub	N/A
1268	GCTGATGCTGGACATACACCTATATTATTGGAAGCTAGAGATGTTCTGGGAGGAAAGGTCTATATGTTAATTCATAATATATTTTTATATTCGATCATAAATTAGTTTATAT	GCTGATGCTGGACATACACCTATANTATNGGAAGCTNGAGATGTTTTAGGAGGAAATGTC----------TTCATAATACATTTTTATATTTGATCATAAATTAGTTTATAT	102	14	del	N/A
1269	GCTGATGCTGGACATACACCTATATTATTGGAAGCTAGAGATGTTCTGGGAGGAAAGGTCTATATGTTAATTCATAATATATTTTTATATTCGATCATAAATTAGTTTATAT	GCTGATGCTGGACATACACCTATANTATNGGAAGCTAGAGATGTTTTAGGAGGAAAGGTC----------TTCATAATATATTTTTATATTTGATCATAAATTAGTTTATAT	102	14	del	N/A
1270	GCTGATGCTGGACATACACCTATATTATTGGAAGCTAGAGATGTTCTGGGAGGAAAGGTCTATATGTTAATTCATAATATATTTTTATATTCGATCATAAATTAGTTTATAT	GCTGATGCTGGACATACACCTATANTATNGGAAGCTNGAGATGTTCTGGGAGGAAAGGTCTATATGTTAATTCATAATATATTTTTATATTCGATCATAAATTAGTTTATAT	112	14	Sub	N/A
1271	GCTGATGCTGGACATACACCTATATTATTGGAAGCTAGAGATGTTCTGGGAGGAAAGGTCTATATGTTAATTCATAATATATTTTTATATTCGATCATAAATTAGTTTATAT	GCTGATGCTGGACATACACCTATATTATTGGATGCTAGAGATGTTTTAGGAGGAAATGTC----------TTCATAATATATTTTTATATTTGATCATAAATTAGTTTATAT	102	13	del	N/A
1272	GCTGATGCTGGACATACACCTATATTATTGGAAGCTAGAGATGTTCTGGGAGGAAAGGTCTATATGTTAATTCATAATATATTTTTATATTCGATCATAAATTAGTTTATAT	GCTGATGCTGGACATACACCTATACTATGGGAAGCTAGAGATGTTTTAGGAGGAAAGGTC----------TTCATAATATGTTTTTATATTTGATCATAAATTAGTTTATAT	102	13	del	N/A
1273	GCTGATGCTGGACATACACCTATATTATTGGAAGCTAGAGATGTTCTGGGAGGAAAGGTCTATA---TGTTAATTCATAATATATTTTT--------ATATTCGATCATAAATTAGTTTATAT	GCTGATGCTGGACGTACACCTATATTATTGGAAGCTAGAGATGTTCTGGGGGGAAAGGTCTATATACTGTT-ATTCATAATA---TTTTCGAACACAATATTTGATCATAAATTAGTTTATAT	119	13	Ins	N/A
1274	GCTGATGCTGGACATACACCTATATTATTGGAAGCTAGAGATGTTCTGGGAGGAAAGGTCTATA---TGTTAATTCATAATATATTTTT--------ATATTCGATCATAAATTAGTTTATAT	GCTGATGCTGGACATACACCTATATTATTGGAAGCTAGAGATGTTCTGGGGAGAAAGGTCTATATACTGTT-ATTCATAATA---TTTTCGAACACAATATTTGATCATAAATTAGTTTATAT	119	13	Ins	N/A
1275	GCTGATGCTGGACATACACCTATATTATTGGAAGCTAGAGATGTTCTGGGAGGAAAGGTCTATA---TGTTAATTCATAATATATTTTT--------ATATTCGATCATAAATTAGTTTATAT	GCTGATGCTGGACATACACCTATATTATTGGATGCTAGAGATGTTCTGGGGGGAAAGGTCTATATACTGTT-ATTCATAATA---TTTTCGAACACAATATTTGATCATAAATTAGTTTATAT	119	13	Ins	N/A
1276	GCTGATGCTGGACATACACCTATATTATTGGAAGCTAGAGATGTTCTGGGAGGAAAGGTCTATA---TGTTAATTCATAATATATTTTT--------ATATTCGATCATAAATTAGTTTATAT	GCTGATGCTGGACATACACCTATATTATTGGAAGCTAGAGATGTTCTGGGGGGAAAGGTCTATATACTGTT-ATTAATAATA---TTTTCGAACACAATATTTGATCATAAATTAGTTTATAT	119	13	Ins	N/A
1277	GCTGATGCTGGACATACACCTATATTATTGGAAGCTAGAGATGTTCTGGGAGGAAAGGTCTATATGTTAATTCATAATATATTTTTATA-TTCGATCATAAATTAGTTTATAT	GCTGATGCTGGACATACACCTATATTATTGGAAGCTAGAGATGTTTTAGGGGGAAAGGTC----------TTCATAATATATTTTTATATTTTGATCATAAATTAGTTTATAT	103	13	del	N/A
1278	GCTGATGCTGGACATACACCTATATTATTGGAAGCTAGAGATGTTCTGGGAGGAAAGGTCTATATGTTAATTCATAATATATTTTTATA-TTCGATCATAAATTAGTTTATAT	GCTGATGCTGGACATACACCTATATTATTGGAAGCTAGAGATGTTTTAGGAGGAAAGGCC----------TTCATAATATATTTTTATATTTTGATCATAAATTAGTTTATAT	103	13	del	N/A
1279	GCTGATGCTGGACATACACCTATATTATTGGAAGCTAGAGATGTTCTGGGAGGAAAGGTCTATATGTTAATTCATAATATATTTTTATATTCGATCATAAATTAGTTTATAT	GCTGATGCTGGACATACACCTCTATTATTGGAAGCTAGAGATGTTTTAGGAGGAAATGTC----------TTCATAATATATTTTTATATTTGATCATAAATTAGTTTATAT	102	13	del	N/A
1280	GCTGATGCTGGACATACACCTATATTATTGGAAGCTAGAGATGTTCTGGGAGGAAAGGTCTATA---TGTTAATTCATAATATATTTTT--------ATATTCGATCATAAATTAGTTTATAT	GCTGATGCTGGACATACACCTATATTATTGGAAGCTAGAGTTGTTCTGGGGGGAAAGGTCTATATACTGTT-ATTCATAATA---TTTTCGAACACAATATTTGATCATAAATTAGTTTATAT	119	13	Ins	N/A
1281	GCTGATGCTGGACATACACCTATATTATTGGAAGCTAGAGATGTTCTGGGAGGAAAGGTCTATATGTTAATTCATAATATATTTTTATATTCGATCATAAATTAGTTTATAT	GCTGATGCTGGACATACACCTATATTATTGGAAGCTAGAGATGTTTTAGGAGGAAA----------TGACTTCATAATACATTTTTATATTTGATCATAAATTAGTTTATAT	102	13	del	N/A
1282	GCTGATGCTGGACATACACCTATATTATTGGAAGCTAGAGATGTTCTGGGAGGAAAGGTCTATATGTTAATTCATAATATATTTTTATATTCGATCATAAATTAGTTTATAT	GCTGATGCTGGACATACACCTATATTATTGGAAGCTAGAGATGTTTTAGGAGGAAAGGTC----------TTCATAATTTATTTTTATATTTGATCATAAATTAGTTTATAT	102	13	del	N/A
1283	GCTGATGCTGGACATACACCTATATTATTGGAAGCTAGAGATGTTCTGGGAGGAAAGGTCTATATGTTAATTCATAATATATTTTTATATTCGATCATAAATTAGTTTATAT	GCTGATGCTGTACATACACCTATACTATTGGAAGCTAGAGATGTTTTAGGAGGAAAGGTC----------TTCATAATATGTTTTTATATTTGATCATAAATTAGTTTATAT	102	13	del	N/A
1284	GCTGATGCTGGACATACACCTATATTATTGGAAGCTAGAGATGTTCTGGGAGGAAAGGTCTATA---TGTTAATTCATAATATATTTTT--------ATATTCGATCATAAATTAGTTTATAT	GCTGATGCTGGACATACACCTATATTATTGGAAGCTAGAGATGTTCTGGGGGGAAAGGTTTATATACTGTT-ATTCATAATA---TTTTCGAACACAATATTTGATCATAAATTAGTTTATAT	119	13	Ins	N/A
1285	GCTGATGCTGGACATACACCTATATTATTGGAAGCTAGAGATGTTCTGGGAGGAAAGGTCTATATGTTAATTCATAATATATTTTTATATTCGATCATAAATTAGTTTATAT	GCTGATGCTGGACATACACCTATATTATTGGAAGCTAGAGATGTTTTAGGAGGAAATGTC----------TTCATAATACATTTTTATATTTGATCATAAATTAGTTTATAA	102	13	del	N/A
1286	GCTGATGCTGGACATACACCTATATTATTGGAAGCTAGAGATGTTCTGGGAGGAAAGGTCTATATGTTAATTCATAATATATTTTTATATTCGATCATAAATTAGTTTATAT	GCTGATGCTGGACATACACCTATATTATTGGAAGCTAGAGATGTTTTAGGAGGAAAGGTC----------TTCATAATATATTTTTATATTTGATCATAAATTAGTTTATTT	102	13	del	N/A
1287	GCTGATGCTGGACATACACCTATATTATTGGAAGCTAGAGATGTTCTGGGAGGAAAGGTCTATA---TGTTAATTCATAATATATTTTT--------ATATTCGATCATAAATTAGTTTATAT	GCTGATGCTGGACATACACCTATATTATTGGAAGCTAGAGATGTTCTGGGGGGAAAGATCTATATACTGTT-ATTCATAATA---TTTTCGAACACAATATTTGATCATAAATTAGTTTATAT	119	13	Ins	N/A
1288	GCTGATGCTGGACATACACCTATATTATTGGAAGCTAGAGATGTTCTGGGAGGAAAGGTCTATATGTTAATTCATAATATATTTTTATATTCGATCATAAATTAGTTTATAT	GCTGATGCTGGACATACACCAATATTATTGGAAGCTAGAGATGTTTTAGGAGGAAAGGTC----------TTCATAATATATTTTTATATTTGATCATAAATTAGTTTATAT	102	13	del	N/A
1289	GCTGATGCTGGACATACACCTATATTATTGGAAGCTAGAGATGTTCTGGGAGGAAAGGTCTATA---TGTTAATTCATAATATATTTTT--------ATATTCGATCATAAATTAGTTTATAT	GCTGATGCTGGACATACACCTATATTATTGGAAGCTAGAGATGTTCTGGCGGGAAAGGTCTATATACTGTT-ATTCATAATA---TTTTCGAACACAATATTTGATCATAAATTAGTTTATAT	119	13	Ins	N/A
1290	GCTGATGCTGGACATACACCTATATTATTGGAAGCTAGAGATGTTCTGGGAGGAAAGGTCTATATGTTAATTCATAATATATTTTTATATTCGATCATAAATTAGTTTATAT	GCTGATGCTGGACATCCACCTCTATTATTGGAAGCTAGAGATGTTTTAGGAGGAAATGTC----------TTCATAATACATTTTTATATTTGATCATAAATTAGTTTATAT	102	13	del	N/A
1291	GCTGATGCTGGACATACACCTATATTATTGGAAGCTAGAGATGTTCTGGGAGGAAAGGTCTATATGTTAATTCATAATATATTTTTATATTCGATCATAAATTAGTTTATAT	GCTGATGCTGGACATACACCTTTATTATTGGAAGCTAGAGATGTTTTAGGAGGAAAGGTC----------TTCATAATATATTTTTATATTTGATCATAAATTAGTTTATAT	102	13	del	N/A
1292	GCTGATGCTGGACATACACCTATATTATTGGAAGCTAGAGATGTTCTGGGAGGAAAGGTCTATATGTTAATTCATAATATATTTTTATATTCGATCATAAATTAGTTTATAT	GCTGAGGCTGGACATACACCTATATTATTGGAAGCTAGAGATGTTCTGGGAGGAAAGGTC----------TTCATAATATATTTTTATATTTGATCATAAATTAGTTTATAT	102	13	del	N/A
1293	GCTGATGCTGGACATACACCTATATTATTGGAAGCTAGAGATGTTCTGGGAGGAAAGGTCTATATGTTAATTCATAATATATTTTTATATTCGATCATAAATTAGTTTATAT	GCTGATGCTGGACATACACCTATATTAGTGGAAGCTAGAGATGTTCGGGGAGGAAAGGTCTATATGTTAATTCATAATATATTTTTATATTCGATCATAAATTAGTTTATAT	112	13	Sub	N/A
1294	GCTGATGCTGGACATACACCTATATTATTGGAAGCTAGAGATGTTCTGGGAGGAAAGGTCTATA---TGTTAATTCATAATATATTTTT--------ATATTCGATCATAAATTAGTTTATAT	GCTGATGCTGGACATACACCTATATTATTGGAAGCTAGAGATGTTCTGGGGGGAAAGGTCTATATACTGTT-ATTCATAATA---CTTTCGAACACAATATTTGATCATAAATTAGTTTATAT	119	13	Ins	N/A
1295	GCTGATGCTGGACATACACCTATATTATTGGAAGCTAGAGATGTTCTGGGAGGAAAGGTCTATATGTTAATTCATAATATATTTTTATA-TTCGATCATAAATTAGTTTATAT	GCTGATGCTGGACATACACCTATATTATTGGAAGCTAGAGATGTTTTAGGAGGAAAGGTC----------TTTATAATATATTTTTATATTTTGATCATAAATTAGTTTATAT	103	13	del	N/A
1296	GCTGATGCTGGACATACACCTATATTATTGGAAGCTAGAGATGTTCTGGGAGGAAAGGTCTATATGTTAATTCATAATATATTTTTATATTCGATCATAAATTAGTTTATAT	GCCGATGCTGGACATACACCTATATTATTGGAAGCTAGAGATGTTTTAGGAGGAAATGTC----------TTCATAATATATTTTTATATTTGATCATAAATTAGTTTATAT	102	13	del	N/A
1297	GCTGATGCTGGACATACACCTATATTATTGGAAGCTAGAGATGTTCTGGGAGGAAAGGTCTATATGTTAATTCATAATATATTTTTATATTCGATCATAAATTAGTTTATAT	GCTGATGCTGGACATACACCTATATTATTGGAAGCTAGAGCTGTTCTGGGAGGAAAGGTCTATATGTTAATTCATAATATATTGTTATATTCGATCATAAATTAGTTTATAT	112	13	Sub	N/A
1298	GCTGATGCTGGACATACACCTATATTATTGGAAGCTAGAGATGTTCTGGGAGGAAAGGTCTATATGTTAATTCATAATATATTTTTATATTCGATCATAAATTAGTTTATAT	GCTGATGCTGGACATACACCTATATTATGGGAAGCTAGAGATGTTTTAGGAGGAAAGGTC----------TTCATAATATATTTTTGTATTTGATCATAAATTAGTTTATAT	102	13	del	N/A
1299	GCTGATGCTGGACATACACCTATATTATTGGAAGCTAGAGATGTTCTGGGAGGAAAGGTCTATATGTTAATTCATAATATATTTTTATATTCGATCATAAATTAGTTTATAT	GCTGATGCTGGACATACACCTATATTATTGGAAGCTAGAGATGTTTTAGGAGGAAATGGC----------TTCATAATACATTTTTATATTTGATCATAAATTAGTTTATAT	102	13	del	N/A
1300	GCTGATGCTGGACATACACCTATATTATTGGAAGCTAGAGATGTTCTGGGAGGAAAGGTCTATA---TGTTAATTCATAATATATTTTT--------ATATTCGATCATAAATTAGTTTATAT	GCTGATGCTGGACATACACCTATATTATGGGAAGCTAGAGATGTTCTGGGGGGAAAGGTCTATATACTGTT-ATTCATAATA---TTTTCGAACACAATATTTGATCATAAATTAGTTTATAT	119	13	Ins	N/A
1301	GCTGATGCTGGACATACACCTATATTATTGGAAGCTAGAGATGTTCTGGGAGGAAAGGTCTATA---TGTTAATTCATAATATATT-----TTTATATTCGATCATAAATTAGTTTATAT	GCTGATGCTGGACATACACCTATATTATTGGAAGCTAGAGATGTTCTGGGGGGAAAGGTCTATATACTGTT-ATTCATAATATCTTCGAACACAATATTTGATCATAAATTAGTTTATAT	119	13	Ins	N/A
1302	GCTGATGCTGGACATACACCTATATTATTGGAAGCTAGAGATGTTCTGGGAGGAAAGGTCTATATGTTAATTCATAATATATTTTTATATTCGATCATAAATTAGTTTATAT	GCTGACGCTGGACATACACCTATATTATTGGAAGCTAGAGATGTTTTAGGAGGAAATGTC----------TTCATAATATATTTTTATATTTGATCATAAATTAGTTTATAT	102	13	del	N/A
1303	GCTGATGCTGGACATACACCTATATTATTGGAAGCTAGAGATGTTCTGGGAGGAAAGGTCTATATGTTAATTCATAATATATTTTTATATTCGATCATAAATTAGTTTATAT	GCTGATGCTGGACATACACCTATATTATTGGAAGCTAGAGATGCTTTAGGAGGAAATGTC----------TTCATAATATATTTTTATATTTGATCATAAATTAGTTTATAT	102	13	del	N/A
1304	GCTGATGCTGGACATACACCTATATTATTGGAAGCTAGAGATGTTCTGGGAGGAAAGGTCTATATGTTAATTCATAATATATTTTTATATTCGATCATAAATTAGTTTATAT	GCTGATGCTGGACATACACCTATATTATTGGAAGCTAGAGATGTTTAAGGAGGAAAGGTC----------TTCATAATATATTTTTATATTTGATCATAAATTAGTTTATAT	102	13	del	N/A
1305	GCTGATGCTGGACATACACCTATATTATTGGAAGCTAGAGATGTTCTGGGAGGAAAGGTCTATATGTTAATTCATAATATATTTTTATATTCGATCATAAATTAGTTTATAT	GCTGATGCTGGACATACACCTATATTATTGGAAGCTAGACATGTTTTAGGAGGAAATGTC----------TTCATAATACATTTTTATATTTGATCATAAATTAGTTTATAT	102	13	del	N/A
1306	GCTGATGCTGGACATACACCTATATTATTGGAAGCTAGAGATGTTCTGGGAGGAAAGGTCTATATGTTAATTCATAATATATTTTTATATTCGATCATAAATTAGTTTATAT	GCTGATGCTGGACATACACCTATATTATTGGAAGCTAGAGATGTTTTAGGAGGAAATGTC----------TTCATAATACATTTTTATATTTGATCATAAATTAGTTTATCT	102	13	del	N/A
1307	GCTGATGCTGGACATACACCTATATTATTGGAAGCTAGAGATGTTCTGGGAGGAAAGGTCTATATGTTAATTCATAATATATTTTTATA-TTCGATCATAAATTAGTTTATAT	GCTGATGCTGGACATACACCTATATTATTGGAAGCCAGAGATGTTTTAGGAGGAAAGGTC----------TTCATAATATATTTTTATATTTTGATCATAAATTAGTTTATAT	103	13	del	N/A
1308	GCTGATGCTGGACATA--------------------CACCTATATTATTGGAAGCTAGAGATGTTCTGGGAGGAAAGGTCTATATGTTAATTCATAATATATTTTTATATTCGATCATAAATTAGTTTATAT	GCTGATGCTGGACATACACCGCTGATGCTGGACATGCACCTATATTATTGGAAGCTAGAGATGTTTTAGGAGGAAAGGTC----------TTCATAATATATTTTTATATTTGATCATAAATTAGTTTATAT	122	13	Ins	N/A
1309	GCTGATGCTGGACATACACCTATATTATTGGAAGCTAGAGATGTTCTGGGAGGAAAGGTCTATATGTTAATTCATAATATATTTTTATATTCGATCATAAATTAGTTTATAT	GCTGATGCTGGACATACACCTATATTATTGGAAGCTAGAGATGTTTTAGGAGGAAATGTC----------TTCATCATACATTTTTATATTTGATCATAAATTAGTTTATAT	102	13	del	N/A
1310	GCTGATGCTGGACATACACCTATATTATTGGAAGCTAGAGATGTTCTGGGAGGAAAGGTCTATA---TGTTAATTCATAATATATTTTT--------ATATTCGATCATAAATTAGTTTATAT	GCTGATGCTGGACATACACCTATATTATTGGAAGCTAGAGATGTTCTGGGGGGTAAGGTCTATATACTGTT-ATTCATAATA---TTTTCGAACACAATATTTGATCATAAATTAGTTTATAT	119	13	Ins	N/A
1311	GCTGATGCTGGACATACACCTATATTATTGGAAGCTAGAGATGTTCTGGGAGGAAAGGTCTATATGTTAATTCATAATATATTTTTATATTCGATCATAAATTAGTTTATAT	GCTGATGCAGGACATACACCTATATTATTGGAAGCTAGAGATGTTCTGGGAGGAAAGGTCTATATGTTAATTCATAATATATTTTTATATTCGATCATAAATTAGTTTATAT	112	13	Sub	N/A
1312	GCTGATGCTGGACATACACCTATATTATTGGAAGCTAGAGATGTTCTGGGAGGAAAGGTCTATATGTTAATTCATAATATATTTTTATATTCGATCATAAATTAGTTTATAT	GCTGATGCTGGACATACACCTATATTATTGGAAGCTAGAGATGTTTTACGAGGAAAGGTC----------TTCATAATATATTTTTATATTTGATCATAAATTAGTTTATAT	102	13	del	N/A
1313	GCTGATGCTGGACATACACCTATATTATTGGAAGCTAGAGATGTTCTGGGAGGAAAGGTCTATA---TGTTAATTCATAATATATTTTT--------ATATTCGATCATAAATTAGTTTATAT	GCTGATGCTGGACATACACCTATAGTATTGGAAGCTAGAGATGTTCTGGGGGGAAAGGTCTATATACTGTT-ATTCATAATA---TTTTCGAACACAATATTTGATCATAAATTAGTTTATAT	119	13	Ins	N/A
1314	GCTGATGCTGGACATACACCTATATTATTGGAAGCTAGAGATGTTCTGGGAGGAAAGGTCTATATGTTAATTCATAATATATTTTTATATTCGATCATAAATTAGTTTATAT	GCTGATGCTGGACATACACCTATATTATTGGAAGCTAGAGATGTTTTAGGAGGAAATGTC----------TTCATAATACATTTTTATATTTGCTCATAAATTAGTTTATAT	102	13	del	N/A
1315	GCTGATGCTGGACATACACCTATATTATTGGAAGCTAGAGATGTTCTGGGAGGAAAGGTCTATATGTTAATTCATAATATATTTTTATA-TTCGATCATAAATTAGTTTATAT	GCTGATGCTGGACATACACCTATATTATTGGAATCTAGAGATGTTTTAGGAGGAAAGGTC----------TTCATAATATATTTTTATATTTTGATCATAAATTAGTTTATAT	103	13	del	N/A
1316	GCTGATGCTGGACATACACCTATATTATTGGAAGCTAGAGATGTTCTGGGAGGAAAGGTCTATATGTTAATTCATAATATATTTTTATATTCGATCATAAATTAGTTTATAT	GCTGATGCTGGACATACACCTATACTATTGGAAGATAGAGATGTTTTAGGAGGAAAGGTC----------TTCATAATATGTTTTTATATTTGATCATAAATTAGTTTATAT	102	13	del	N/A
1317	#NAME?	GCTGATGCTGGACATACACCGCTGATGCTGGACATACACCTATATTATTGGAAGCTAGAGATGTTTTAGGAGGAAAGGTC----------TTCATAATATGTTTTTATATTTGATCATAAATTAGTTTATAT	122	13	Ins	N/A
1318	GCTGATGCTGGACATACACCTATATTATTGGAAGCTAGAGATGTTCTGGGAGGAAAGGTCTATATGTTAATTCATAATATATTTTTATATTCGATCATAAATTAGTTTATAT	GCTGATGCTGGACATACACCTATAGTATTGGAAGCTAGAGATGTTGTGGGAGGAAAGGTCTATATGTTAATTCATAATATATTTTTATATTCGATCATAAATTAGTTTATAT	112	13	Sub	N/A
1319	GCTGATGCTGGACATACACCTATATTATTGGAAGCTAGAGATGTTCTGGGAGGAAAGGTCTATATGTTAATTCATAATATATTTTTATATTCGATCATAAATTAGTTTATAT	GCTGATGCTGGACATACACCTATANTATNGGAAGCTNGAGANGTTCTGGGAGGAAAGGTCTATATGTTAATTCATAATATATTTTTATATTCGATCATAAATTAGTTTATAT	112	13	Sub	N/A
1320	GCTGATGCTGGACATACACCTATATTATTGGAAGCTAGAGATGTTCTGGGAGGAAAGGTCTATATGTTAATTCATAATATATTTTTATATTCGATCATAAATTAGTTTATAT	GCTGATGCTGGACATACACCTATATTATTGGAAGCTAGAGATGTTTTAGGAGGAAAGGTCTA----------CATAATATATTTTTATATTTGATCATAAATTAGTTTATAT	102	12	del	N/A
1321	GCTGATGCTGGACATACACCTATATTATTGGAAGCTAGAGATGTTCTGGGAGGAAAGGTCTATA---TGTTAATTCATAATATATTTTT--------ATATTCGATCATAAATTAGTTTATAT	GCTGATGCTGGACATACACCTATATTATTGGAAGCTAGAGATGTTCTAGGGGGAAAGGTCTATATACTGTT-ATTCATAATA---TTTTCGAACACAATATTTGATCATAAATTAGTTTATAT	119	12	Ins	N/A
1322	GCTGATGCTGGACATACACCTATATTATTGGAAGCTAGAGATGTTCTGGGAGGAAAGGTCTATATGTTAATTCATAATATATTTTTATATTCGATCATAAATTAGTTTATAT	GCTGATGCTGGACATACACCTATATTATTGGAAGCTAGAGATGTTTTAGGAGGGAAGGTC----------TTCATAATATATTTTTGTATTTGATCATAAATTAGTTTATAT	102	12	del	N/A
1323	GCTGATGCTGGACATACACCTATATTATTGGAAGCTAGAGATGTTCTGGGAGGAAAGGTCTATATGTTAATTCATAATATATTTTTATATTCGATCATAAATTAGTTTATAT	GCTGATGCTGGACATACACCTATATTATTGGAAGCTAGAGATGTTCTGGGAGGAAAGGTCTATATGTTAATTCATAATATATTTTAATATTCGATCATAAATTAGTTTATAT	112	12	Sub	N/A
1324	GCTGATGCTGGACATACACCTATATTATTGGAAGCTAGAGATGTTCTGGGAGGAAAGGTCTATA---TGTTAATTCATAATATATT-----TTTATATTCGATCATAAATTAGTTTATAT	GCTGATGCTGGACATACACCTATATTATTGGAAGCTAGAGATGTTCTGGGGGGAAAGGTCTATATACTGTT-ATTCATAATATGTTCGAACACAATATTTGATCATAAATTAGTTTATAT	119	12	Ins	N/A
1325	GCTGATGCTGGACATACACCTATATTATTGGAAGCTAGAGATGTTCTGGGAGGAAAGGTCTATATGTTAATTCATAATATATTTTTATATTCGATCATAAATTAGTTTATAT	GCTGATGCTGGACATACACCTATATTATTGGAAGCTAAAGATGTTCTAGGAGGAAATGTC----------TTCATAATACATTTTTATATTTGATCATAAATTAGTTTATAT	102	12	del	N/A
1326	GCTGATGCTGGACATACACCTATATTATTGGAAGCTAGAGATGTTCTGGGAGGAAAGGTCTATATGTTAATTCATAATATATTTTTATATTCGATCATAAATTAGTTTATAT	GCTGATGCTGGACATACTCCTATATTATTGGAAGCTAGAGATGTTTTAGGAGGAAATGTC----------TTCATAATACATTTTTATATTTGATCATAAATTAGTTTATAT	102	12	del	N/A
1327	GCTGATGCTGGACATACACCTATATTATTGGAAGCTAGAGATGTTCTGGGAGGAAAGGTCTATATGTTAATTCATAATATATTTTTATATTCGATCATAAATTAGTTTATAT	GCTGATGCTGGACATACACCTATATTATTGGAAGCTAGAGATGTTTTAGGAGGAAATGTC----------TTCATAATATATTTTTATATTTAATCATAAATTAGTTTATAT	102	12	del	N/A
1328	GCTGATGCTGGACATACACCTATATTATTGGAAGCTAGAGATGTTCTGGGAGGAAAGGTCTATATGTTAATTCATAATATATTTTTATA-TTCGATCATAAATTAGTTTATAT	GCTGATGCTGGACATACACCTATATTATTGGAAGCTAGAGATGTTTTAGGAGGAAAGGTC----------TTCATAATATATTTTTATATTTTTATCATAAATTAGTTTATAT	103	12	del	N/A
1329	GCTGATGCTGGACATACACCTATATTATTGGAAGCTAGAGATGTTCTGGGAGGAAAGGTCTATATGTTAATTCATAATATATTTTTATATTCGATCATAAATTAGTTTATAT	GCTGATGCTGGACATACACCTATATGAGTGGAAGCTAGAGATGTTCTGGGAGGAAAGGTCTATATGTTAATTCATAATATATTTTTATATTCGATCATAAATTAGTTTATAT	112	12	Sub	N/A
1330	GCTGATGCTGGACATACACCTATATTATTGGAAGCTAGAGATGTTCTGGGAGGAAAGGTCTATATGTTAATTCATAATATATTTTTATATTCGATCATAAATTAGTTTATAT	GCTGATGCTGGACATACACCTATATTATTGGAAGCTAGAGATGTTTTAGGAGGAAATGTC----------TTCATAATACATTTTTATATTGGATCATAAATTAGTTTATAT	102	12	del	N/A
1331	GCTGATGCTGGACATACACCTATATTATTGGAAGCTAGAGATGTTCTGGGAGGAAAGGTCTATATGTTAATTCATAATATATTTTTATATTCGATCATAAATTAGTTTATAT	GCTGATGCTGGACATACACCTATATTATTGGAAGCTAGAGATGTTTTAGGAGGAAAGGTC----------TTCATAATATATTTTTATATTTGATCATAAATTTGTTTATAT	102	12	del	N/A
1332	GCTGATGCTGGACATACACCTATATTATTGGAAGCTAGAGATGTTCTGGGAGGAAAGGTCTATATGTTAATTCATAATATATTTTTATATTCGATCATAAATTAGTTTATAT	GCTGATGCTGGACATACACCTATATTATTGGAAGCTAGAGATGTTTTAGGAGGAAAGGTC----------TTCATAATATATTTTTATATTTGATCATAAATTAGTTTATAA	102	12	del	N/A
1333	GCTGATGCTGGACATACACCTATATTATTGGAAGCTAGAGATGTTCTGGGAGGAAAGGTCTATA---TGTTAATTCATAATATATTTTT--------ATATTCGATCATAAATTAGTTTATAT	GCTGATGCTGGACATACACCTATATTATTGGAAGCTAGAGATGTTCTGGGGGGAAAGGTCTATATACTGTT-ATTCATAATA---TTTTCGAACACAATAGTTGATCATAAATTAGTTTATAT	119	12	Ins	N/A
1334	GCTGATGCTGGACATACACCTATATTATTGGAAGCTAGAGATGTTCTGGGAGGAAAGGTCTATATGTTAATTCATAATATATTTTTATATTCGATCATAAATTAGTTTATAT	GCTGATGCTGGACATACACCTATATGATTGGAAGCTAGAGATGTTTTAGGAGGAAAGGTC----------TTCATAATACATTTTTATATTTGATCATAAATTAGTTTATAT	102	12	del	N/A
1335	GCTGATGCTGGACATACACCTATATTATTGGAAGCTAGAGATGTTCTGGGAGGAAAGGTCTATATGTTAATTCATAATATATTTTTATATTCGATCATAAATTAGTTTATAT	GCTGATGCTGGACATACACCTATATTATTGGAAGCTAGAGATGTTTTAGGAGGAAATGTC----------TTCATAATACTTTTTTATATTTGATCATAAATTAGTTTATAT	102	12	del	N/A
1336	GCTGATGCTGGACATACACCTATATTATTGGAAGCTAGAGATGTTCTGGGAGGAAAGGTCTATATGTTAATTCATAATATATTTTTATA-TTCGATCATAAATTAGTTTATAT	GCTGATGCTGGACATACACCTATGTTATTGGAAGCTAGAGATGTTTTAGGAGGAAAGGTC----------TTCATAATATATTTTTATATTTTGATCATAAATTAGTTTATAT	103	12	del	N/A
1337	GCTGATGCTGGACATACACCTATATTATTGGAAGCTAGAGATGTTCTGGGAGGAAAGGTCTATATGTTAATTCATAATATATTTTTATATTCGATCATAAATTAGTTTATAT	GCTGATGCTGGGCATACACCTATATTATTGGAAGCTAGAGATGTTTTAGGAGGAAAGGTC----------TTCATAATATATTTTTGTATTTGATCATAAATTAGTTTATAT	102	12	del	N/A
1338	GCTGATGCTGGACATACACCTATATTATTGGAAGCTAGAGATGTTCTGGGAGGAAAGGTCTATATGTTAATTCATAATATATTTTTATATTCGATCATAAATTAGTTTATAT	GCTGATGCTGGACATACACCTATATTAGTGGAAGCTAGAGATGTTTTAGGAGGAAAGGTC----------TTCATAATACATTTTTATATTTGATCATAAATTAGTTTATAT	102	12	del	N/A
1339	GCTGATGCTGGACATACACCTATATTATTGGAAGCTAGAGATGTTCTGGGAGGAAAGGTCTATATGTTAATTCATAATATATTTTTATA-TTCGATCATAAATTAGTTTATAT	GCTGATGCTGGACATACACCTATATTATTGGAAGCTGGAGATGTTTTAGGAGGAAAGGTC----------TTCATAATATATTTTTATATTTTGATCATAAATTAGTTTATAT	103	12	del	N/A
1340	#NAME?	GCTGATGCTGGACATACACCGCTGATGCTGGACATACACCTATATTATTGGAAGCTAGAGATGTTCTGGGGGGAAAGGTCTATACACTGTT-ATTCATAATA---TTTTCGAACACAATATTTGATCATAAGTTAGTTTATAT	139	12	Ins	N/A
1341	GCTGATGCTGGACATACACCTATATTATTGGAAGCTAGAGATGTTCTGGGAGGAAAGGTCTATATGTTAATTCATAATATATTTTTATATTCGATCATAAATTAGTTTATAT	GCTGATGCTGTACATACACCTATATTATTGGAAGCTAGAGATGTTTTAGGAGGAAAGGTC----------TTCATAATATATTTTTGTATTTGATCATAAATTAGTTTATAT	102	12	del	N/A
1342	GCTGATGCTGGACATACACCTATATTATTGGAAGCTAGAGATGTTCTGGGAGGAAAGGTCTATATGTTAATTCATAATATATTTTTATATTCGATCATAAATTAGTTTATAT	GCTGATGCTGGACATACACCTATATTATTGGAAGCTAGAGATGTTTTAGGAGGAAATGTC----------TTCATAATATAGTTTTATATTTGATCATAAATTAGTTTATAT	102	12	del	N/A
1343	GCTGATGCTGGACATACACCTATATTATTGGAAGCTAGAGATGTTCTGGGAGGAAAGGTCTATATGTTAATTCATAATATATTTTTATATTCGATCATAAATTAGTTTATAT	GCTGATGCTGGACATACACCTATATTATTGGAAGCTAGAGATGTTTTAGGAGGAAAGGTC----------TTCATAATATATTTTTATATTTGTTCATAAATTAGTTTATAT	102	12	del	N/A
1344	GCTGATGCTGGACATACACCTATATTATTGGAAGCTAGAGATGTTCTGGGAGGAAAGGTCTATATGTTAATTCATAATATATTTTTATATTCGATCATAAATTAGTTTATAT	GCTGATGCTGGACATACACCTATATTATTGGAAGCTAGAGATGTTTTAGGAGGAAAGGTC----------TTCATAATATATTTTTATATTTGATCATAAATTAGTTTATCT	102	12	del	N/A
1345	GCTGATGCTGGACATACACCTATATTATTGGAAGCTAGAGATGTTCTGGGAGGAAAGGTCTATA---TGTTAATTCATAATATATTTTT--------ATATTCGATCATAAATTAGTTTATAT	GCTGATGCTGGACATACACCTATATTATTGGAAGCTAGAGATGTTCTGGGGGGAAAGGTCTATATACTGTT-ATTCGTAATA---TTTTCGAACACAATATTTGATCATAAATTAGTTTATAT	119	12	Ins	N/A
1346	GCTGATGCTGGACATACACCTATATTATTGGAAGCTAGAGATGTTCTGGGAGGAAAGGTCTATATGTTAATTCATAATATATTTTTATATTCGATCATAAATTAGTTTATAT	GCTGATGCTGGACATACACCTATATTATTGGAAGCTAGAGATGTTTTAGGAGGAAAGGTC----------TTCATAATATATTTTTATATTTGATCATAAATTAGATTATAT	102	12	del	N/A
1347	GCTGATGCTGGACATACACCTATATTATTGGAAGCTAGAGATGTTCTGGGAGGAAAGGTCTATATGTTAATTCATAATATATTTTTATA-TTCGATCATAAATTAGTTTATAT	GCTGATGCTGGACATACACCTATATTATTGGAAGCTAGAGATGTTTTAGGAGGAAAGGTC----------TTCATAATATATGTTTATATTTTGATCATAAATTAGTTTATAT	103	12	del	N/A
1348	GCTGATGCTGGACATACACCTATATTATTGGAAGCTAGAGATGTTCTGGGAGGAAAGGTCTATATGTTAATTCATAATATATTTTTATATTCGATCATAAATTAGTTTATAT	GCTGATGCTGGACATACACCTATATTATTGGAAGCTAGAGATGTTTTAGGAGGAAATGTC----------TTCATAATATATCTTTATATTTGATCATAAATTAGTTTATAT	102	12	del	N/A
1349	GCTGATGCTGGACATACACCTATATTATTGGAAGCTAGAGATGTTCTGGGAGGAAAGGTCTATATGTTAATTCATAATATATTTTTATATTCGATCATAAATTAGTTTATAT	GCTGATGCTGGACATACACCTATATTATTGGAAGCTAGAGATGTTTTAGGAGGAAATGTC----------TTCAT-ATACATTTTTATATTTGATCATAAATTAGTTTATAT	101	12	del	N/A
1350	GCTGATGCTGGACATACACCTATATTATTGGAAGCTAGAGATGTTCTGGGAGGAAAGGTCTATATGTTAATTCATAATATATTTTTATATTCGATCATAAATTAGTTTATAT	GCTGATGCTGGACATACACCTATATTATTGGAAGCTAGAGATGTTTTAGGAGGAAAGGTC----------TTCATAATATATTTTTATATTTGATCATAAATTACTTTATAT	102	12	del	N/A
1351	GCTGATGCTGGACATACACCTATATTATTGGAAGCTAGAGATGTTCTGGGAGGAAAGGTCTATATGTTAATTCATAATATATTTTTATATTCGATCATAAATTAGTTTATAT	TCTGATGCTGGACATACACCTATATTATTGGAAGCTAGAGATGTTTTAGGAGGAAATGTC----------TTCATAATATATTTTTATATTTGATCATAAATTAGTTTATAT	102	12	del	N/A
1352	GCTGATGCTGGACATACACCTATATTATTGGAAGCTAGAGATGTTCTGGGAGGAAAGGTCTATATGTTAATTCATAATATATTTTTATATTCGATCATAAATTAGTTTATAT	GCTGATGCTGGACATACACCTATATTATTGGAAGCTAGAGATGTTTAAGGAGGAAATGTC----------TTCATAATACATTTTTATATTTGATCATAAATTAGTTTATAT	102	12	del	N/A
1353	GCTGATGCTGGACATACACCTATATTATTGGAAGCTAGAGATGTTCTGGGAGGAAAGGTCTATATGTTAATTCATAATATATTTTTATATTCGATCATAAATTAGTTTATAT	GCTGATGCTGGACATACACCTATATTATTAGAAGCTAAAGATGTTTTAGGAGGAAAGGTC----------TTCATAATATATTTTTATATTTGATCATAAATTAGTTTATAT	102	12	del	N/A
1354	GCTGATGCTGGACATACACCTATATTATTGGAAGCTAGAGATGTTCTGGGAGGAAAGGTCTATATGTTAATTCATAATATATTTTTATATTCGATCATAAATTAGTTTATAT	GCTGATGCTGGACATACACCTATATTATTGGAAGCTAAAGATGTTTTAGGAGGAAATGTC----------TTCATAATATATTTTTATATTTGATCATAAATTAGTTTATAT	102	12	del	N/A
1355	#NAME?	GCTGATGCTGGACATACACCGCTGATGCTGGACATACACCTATATTATTGGAAGCTAGAGATGTTCTGGGGGGAAAGGTCTATATGTTAATTCATAATATATTTTTATATTCGATCATAAATTAGTTTATAT	132	12	Ins	N/A
1356	GCTGATGCTGGACATACACCTATATTATTGGAAGCTAGAGATGTTCTGGGAGGAAAGGTCTATATGTTAATTCATAATATATTTTTATATTCGATCATAAATTAGTTTATAT	GCTGATGCTGGACATACACCTATATTATTGGAAGCTAGAGAGGTTTTAGGAGGAAATGTC----------TTCATAATACATTTTTATATTTGATCATAAATTAGTTTATAT	102	12	del	N/A
1357	GCTGATGCTGGACATACACCTATATTATTGGAAGCTAGAGATGTTCTGGGAGGAAAGGTCTATATGTTAATTCATAATATATTTTTATATTCGATCATAAATTAGTTTATAT	GCTGATGCGGGACATACACCTATACTATTGGAAGCTAGAGATGTTTTAGGAGGAAAGGTC----------TTCATAATATGTTTTTATATTTGATCATAAATTAGTTTATAT	102	12	del	N/A
1358	GCTGATGCTGGACATACACCTATATTATTGGAAGCTAGAGATGTTCTGGGAGGAAAGGTCTATATGTTAATTCATAATATATTTTTATATTCGATCATAAATTAGTTTATAT	GCTGATGCTGGACATACACCTATATTAGTGGAAGCGAGAGATGTTTTAGGAGGAAAGGTC----------TTCATAATATATTTTTATATTTGATCATAAATTAGTTTATAT	102	12	del	N/A
1359	GCTGATGCTGGACATACACCTATATTATTGGAAGCTAGAGATGTTCTGGGAGGAAAGGTCTATA---TGTTAATTCATAATATATTTTT--------ATATTCGATCATAAATTAGTTTATAT	GCTGATGCTGGACATACACCTATATTATTGGAAGCTAGAGATGTTCTGGGGGGAAAGGTCTATATACTGTT-ATTCATAATA---GTTTCGAACACAATATTTGATCATAAATTAGTTTATAT	119	12	Ins	N/A
1360	GCTGATGCTGGACATACACCTATATTATTGGAAGCTAGAGATGTTCTGGGAGGAAAGGTCTATATGTTAATTCATAATATATTTTTATATTCGATCATAAATTAGTTTATAT	GCTGATGCTGGACATACACCTATATTATTGGAAGCTAGAGATGTTTTAGGAGGAAATGTC----------TTCATAATTCATTTTTATATTTGATCATAAATTAGTTTATAT	102	12	del	N/A
1361	GCTGATGCTGGACATACACCTATATTATTGGAAGCTAGAGATGTTCTGGGAGGAAAGGTCTATATGTTAATTCATAATATATTTTTATATTCGATCATAAATTAGTTTATAT	GCTGATGCTGGACATACACCTATATTATTGGAAGCTAGAGATGTTTTAGGAGGAAATGTC----------TTCATAATACATTTTTATATTTGATCATAACTTAGTTTATAT	102	12	del	N/A
1362	GCTGATGCTGGACATACACCTATATTATTGGAAGCTAGAGATGTTCTGGGAGGAAAGGTCTATA---TGTTAATTCATAATATATTTTT--------ATATTCGATCATAAATTAGTTTATAT	GCTGATGCTGGACATACACCTATATTATTGGAAGCTAGAGATTTTCTGGGGGGAAAGGTCTATATACTGTT-ATTCATAATA---TTTTCGAACACAATATTTGATCATAAATTAGTTTATAT	119	12	Ins	N/A
1363	GCTGATGCTGGACATACACCTATATTATTGGAAGCTAGAGATGTTCTGGGAGGAAAGGTCTATATGTTAATTCATAATATATTTTTATATTCGATCATAAATTAGTTTATAT	GCTGATGCTGGACATACACCTATATTATTGGAAGCTGGAGATGTTTTAGGAGGAAATGTC----------TTCATAATATATTTTTATATTTGATCATAAATTAGTTTATAT	102	12	del	N/A
1364	GCTGATGCTGGACATACACCTATATTATTGGAAGCTAGAGATGTTCTGGGAGGAAAGGTCTATATGTTAATTCATAATATATTTTTATATTCGATCATAAATTAGTTTATAT	GCTGATGCTGGACATACACCTATATTATTGGAAGCTAGAGATGTTTTAGGAGGAAATGTC----------TTCATAATCCATTTTTATATTTGATCATAAATTAGTTTATAT	102	12	del	N/A
1365	GCTGATGCTGGACATACACCTATATTATTGGAAGCTAGAGATGTTCTGGGAGGAAAGGTCTATA---TGTTAATTCATAATATATTTTT------ATATTCGATCATAAATTAGTTTATAT	GCTGATGCTGGACATACACCTATATTATTGGAAGCTAGAGATGTTCTGGGGGGAAAGGTCTATATACTGTT-ATTCATAATAT-TTTCTAACACAATATTTGATCATAAATTAGTTTATAT	119	12	Ins	N/A
1366	GCTGATGCTGGACATACACCTATATTATTGGAAGCTAGAGATGTTCTGGGAGGAAAGGTCTATA---TGTTAATTCATAATATATTTTT--------ATATTCGATCATAAATTAGTTTATAT	GCTGATGCTGGACATACACCTATATTATTGGAAGCTAGAGATGTTCTGGG-GGGAAGGTCTATATACTGTT-ATTCATAATA---TTTTCGAACACAATATTTGATCATAAATTAGTTTATAT	118	12	Ins	N/A
1367	GCTGATGCTGGACATACACCTATATTATTGGAAGCTAGAGATGTTCTGGGAGGAAAGGTCTATA---TGTTAATTCATAATATATTTTT--------ATATTCGATCATAAATTAGTTTATAT	GCTGATGCTGGACATACACCTATATTATTGGAAGCTAGAGATGTTCTGGGGGGAAAGGTCTATATACTGTT-ATTCATAATA---TTTTCGAACACAATATTTGATCATGAATTAGTTTATAT	119	12	Ins	N/A
1368	GCTGATGCTGGACATACACCTATATTATTGGAAGCTAGAGATGTTCTGGGAGGAAAGGTCTATATGTTAATTCATAATATATTTTTATATTCGATCATAAATTAGTTTATAT	GCGGATGCTGGACATACACCTATATGATTGGAAGCTAGAGATGTTTTAGGAGGAAAGGTC----------TTCATAATATATTTTTATATTTGATCATAAATTAGTTTATAT	102	12	del	N/A
1369	GCTGATGCTGGACATACACCTATATTATTGGAAGCTAGAGATGTTCTGGGAGGAAAGGTCTATA---TGTTAATTCATAATATATTTTT--------ATATTCGATCATAAATTAGTTTATAT	GCTGATGCTGGAGATACACCTATATTATTGGAAGCTAGAGATGTTCTGGGGGGAAAGGTCTATATACTGTT-ATTCATAATA---TTTTCGAACACAATATTTGATCATAAATTAGTTTATAT	119	12	Ins	N/A
1370	GCTGATGCTGGACATACACCTATATTATTGGAAGCTAGAGATGTTCTGGGAGGAAAGGTCTATATGTTAATTCATAATATATTTTTATATTCGATCATAAATTAGTTTATAT	GCTGAGGCTGGACATACACCTATATTATTGGAAGCTAGAGATGTTCTGGGAGGAAAGGTCTATATGTTAATTCATAATATATTTTTATATTTGATCATAAATTAGTTTATAT	112	12	Sub	N/A
1371	GCTGATGCTGGACATACACCTATATTATTGGAAGCTAGAGATGTTCTGGGAGGAAAGGTCTATATGTTAATTCATAATATATTTTTATATTCGATCATAAATTAGTTTATAT	GCTGATGCTGGACATACACCTATATTAGTGGAAGCTAGAGATGTTTTAGGAGGAAAGGTC----------TTCATAATATATTTTTATATTCGATCATAAATTAGTTTATAT	102	12	del	N/A
1372	GCTGATGCTGGACATACACCTATATTATTGGAAGCTAGAGATGTTCTGGGAGGAAAGGTCTATATGTTAATTCATAATATATTTTTATATTCGATCATAAATTAGTTTATAT	GGTGATGCTGGACATACACCTATACTATTGGAAGCTAGAGATGTTTTAGGAGGAAAGGTC----------TTCATAATATGTTTTTATATTTGATCATAAATTAGTTTATAT	102	12	del	N/A
1373	GCTGATGCTGGACATACACCTATATTATTGGAAGCTAGAGATGTTCTGGGAGGAAAGGTCTATATGTTAATTCATAATATATTTTTATA-TTCGATCATAAATTAGTTTATAT	GTTGATGCTGGACATACACCTATATTATTGGAAGCTAGAGATGTTTTAGGAGGAAAGGTC----------TTCATAATATATTTTTATATTTTGATCATAAATTAGTTTATAT	103	12	del	N/A
1374	GCTGATGCTGGACATACACCTATATTATTGGAAGCTAGAGATGTTCTGGGAGGAAAGGTCTATATGTTAATTCATAATATATTTTTATATTCGATCATAAATTAGTTTATAT	GCTGATGCTGGACATACACCTATATTATTGGAAGATAGAGATGTTCTGGGAGGAAAGGTCTATATGTTAATTCATAATATATTTTTATATTCGATCATAGATTAGTTTATAT	112	12	Sub	N/A
1375	GCTGATGCTGGACATACACCTATATTATTGGAAGCTAGAGATGTTCTGGGAGGAAAGGTCTATATGTTAATTCATAATATATTTTTATATTCGATCATAAATTAGTTTATAT	GCTGATGCTGGACATACACATATATTATTGGAAGCTAGAGATGTTTTAGGAGGAAATGTC----------TTCATAATATATTTTTATATTTGATCATAAATTAGTTTATAT	102	12	del	N/A
1376	GCTGATGCTGGACATACACCTATATTATTGGAAGCTAGAGATGTTCTGGGAGGAAAGGTCTATA---TGTTAATTCATAATATATTTTT--------ATATTCGATCATAAATTAGTTTATAT	GCTGATGCTGGACATACACCTATATTATTGGAAGCGAGAGATGTTCTAGGGGGAAAGGTCTATATACTGTT-ATTCATAATA---TTTTCGAACACAATATTTGATCATAAATTAGTTTATAT	119	12	Ins	N/A
1377	GCTGATGCTGGACATACACCTATATTATTGGAAGCTAGAGATGTTCTGGGAGGAAAGGTCTATA---TGTTAATTCATAATATATTTTT--------ATATTCGATCATAAATTAGTTTATAT	GCTGATGCTGGACATACACGTATATTATTGGAAGCTAGAGATGTTCTGGGGGGAAAGGTCTATATACTGTT-ATTCATAATA---TTTTCGAACACAATATTTGATCATAAATTAGTTTATAT	119	12	Ins	N/A
1378	GCTGATGCTGGACATACACCTATATTATTGGAAGCTAGAGATGTTCTGGGAGGAAAGGTCTATATGTTAATTCATAATATATTTTTATATTCGATCATAAATTAGTTTATAT	GCTGATGCTGGACATACACCTATATTATTGGAAGCTAGAGATGTTCTGGGAGGAAAGGTCTATAGGTTAATTCATAATATATTTTTATATTCGATCATAAATTAGTTTATAT	112	11	Sub	N/A
1379	GCTGATGCTGGACATACACCTATATTATTGGAAGCTAGAGATGTTCTGGGAGGAAAGGTCTATATGTTAATTCATAATATATTTTTATATTCGATCATAAATTAGTTTATAT	GCTGATTCTGGACATACACCTATATTATTGGAAGCTAGAGATGTTTTAGGAGGAAAGGTC----------TTCATAATATATTTTTGTATTTGATCATAAATTAGTTTATAT	102	11	del	N/A
1380	GCTGATGCTGGACATACACCTATATTATTGGAAGCTAGAGATGTTCTGGGAGGAAAGGTCTATATGTTAATTCATAATATATTTTTATATTCGATCATAAATTAGTTTATAT	GCTGATGCTGGACATACACCTATATTATTGGAAGCTAGAGATGATTTAGGAGGAAATGTC----------TTCATAATACATTTTTATATTTGATCATAAATTAGTTTATAT	102	11	del	N/A
1381	GCTGATGCTGGACATACACCTATATTATTGGAAGCTAGAGATGTTCTGGGAGGAAAGGTCTATATGTTAATTCATAATATATTTTTATATTCGATCATAAATTAGTTTATAT	GCTGATGCTGGACATACACCTATATTATTGGACGCTCGAGATGTTTTAGGAGGAAATGTC----------TTCATAATACATTTTTATATTTGATCATAAATTAGTTTATAT	102	11	del	N/A
1382	GCTGATGCTGGACATACACCTATATTATTGGAAGCTAGAGATGTTCTGGGAGGAAAGGTCTATA---TGTTAATTCATAATATATTTTT--------ATATTCGATCATAAATTAGTTTATAT	GCTGATGCTGGACATACACCTATATTATTGGAAGCTAGAGATGTTCTGGGGGGAAAGGTCTATATACTGTT-ATTCATAATA---TTTTCGAGCACAATATTTGATCATAAATTAGTTTATAT	119	11	Ins	N/A
1383	GCTGATGCTGGACATACACCTATATTATTGGAAGCTAGAGATGTTCTGGGAGGAAAGGTCTATATGTTAATTCATAATATATTTTTATATTCGATCATAAATTAGTTTATAT	GCTGATGCTGGACATACACCTATATTATTGGAAGCTAGAGATGTTTTAGGAGGAAATGTC----------TTCATAATATATTTGTATATTTGATCATAAATTAGTTTATAT	102	11	del	N/A
1384	GCTGATGCTGGACATACACCTATATTATTGGAAGCTAGAGATGTTCTGGGAGGAAAGGTCTATATGTTAATTCATAATATATTTTTATATTCGATCATAAATTAGTTTATAT	GCTGATGCTGGACATACACCTATATTATTGGAAGCTAGAGATGTTCTGGGAGGAAAGGTCTATATGTTAATTCATAATATATTTTTATATTCGAACATAAATTAGTTTATAT	112	11	Sub	N/A
1385	GCTGATGCTGGACATACACCTATATTATTGGAAGCTAGAGATGTTCTGGGAGGAAAGGTCTATATGTTAATTCATAATATATTTTTATATTCGATCATAAATTAGTTTATAT	GCTGATGCTGGACATACACCTATATTATTGGAAGCTAGAGATGTTTTAGGAGGAAGTGTC----------TTCATAATATATTTTTATATTTGATCATAAATTAGTTTATAT	102	11	del	N/A
1386	GCTGATGCTGGACATACACCTATATTATTGGAAGCTAGAGATGTTCTGGGAGGAAAGGTCTATATGTTAATTCATAATATATTTTTATATTCGATCATAAATTAGTTTATAT	GCAGATGCTGGACATACACCTATATTATTGGAAGCTAGAGATGTTTTAGGAGGAAATGTC----------TTCATAATACATTTTTATATTTGATCATAAATTAGTTTATAT	102	11	del	N/A
1387	GCTGATGCTGGACATACACCTATATTATTGGAAGCTAGAGATGTTCTGGGAGGAAAGGTCTATATGTTAATTCATAATATATTTTTATATTCGATCATAAATTAGTTTATAT	GCTGATGCTGGACATACACCTATATGATTGGAAGCGAGAGATGTTTTAGGAGGAAAGGTC----------TTCATAATATATTTTTATATTTGATCATAAATTAGTTTATAT	102	11	del	N/A
1388	GCTGATGCTGGACATACACCTATATTATTGGAAGCTAGAGATGTTCTGGGAGGAAAGGTCTATATGTTAATTCATAATATATTTTTATATTCGATCATAAATTAGTTTATAT	GCTGATGCTGGACATACACCTATATTATTGGAAGCTAGAGATGTT-TTGGAGGAAAGGTC----------TTCATAATATATTTTTATATTTGATCATAAATTAGTTTATAT	101	11	del	N/A
1389	GCTGATGCTGGACATACACCTATATTATTGGAAGCTAGAGATGTTCTGGGAGGAAAGGTCTATATGTTAATTCATAATATATTTTTATA-TTCGATCATAAATTAGTTTATAT	GCTGATGCTTGACATACACCTATATTATTGGAAGCTAGAGATGTTTTAGGAGGAAAGGTC----------TTCATAATATATTTTTATATTTTGATCATAAATTAGTTTATAT	103	11	del	N/A
1390	GCTGATGCTGGACATACACCTATATTATTGGAAGCTAGAGATGTTCTGGGAGGAAAGGTCTATATGTTAATTCATAATATATTTTTATATTCGATCATAAATTAGTTTATAT	GCTGATGCTGGACATACACCTATATTATTGGAAGCTAGAGATGTTTTAGCAGGAAATGTC----------TTCATAATACATTTTTATATTTGATCATAAATTAGTTTATAT	102	11	del	N/A
1391	GCTGATGCTGGACATACACCTATATTATTGGAAGCTAGAGATGTTCTGGGAGGAAAGGTCTATATGTTAATTCATAATATATTTTTATATTCGATCATAAATTAGTTTATAT	GCTGATGCTGGACATACACCTATATTATTGGAAGCTAAAGATGTTCTAGGAGGAAAGGTCTATAAGTTAATTCATAATATATTTTTATATTCGATCATAAATTAGTTTATAT	112	11	Sub	N/A
1392	GCTGATGCTGGACATACACCTATATTATTGGAAGCTAGAGATGTTCTGGGAGGAAAGGTCTATATGTTAATTCATAATATATTTTTATATTCGATCATAAATTAGTTTATAT	GCTGATGCTGGACATACACCTATACTATTGGAAACTAGAGATGTTTTAGGAGGAAAGGTC----------TTCATAATATGTTTTTATATTTGATCATAAATTAGTTTATAT	102	11	del	N/A
1393	GCTGATGCTGGACATACACCTATATTATTGGAAGCTAGAGATGTTCTGGGAGGAAAGGTCTATATGTTAATTCATAATATATTTTTATATTCGATCATAAATTAGTTTATAT	GCTGATGCTGGACATACACCTATATTAGTGGAAGCTAGAGATGTTCTGGGAGGAAAGGTCTATATGTTAATTCATAATATATTTTTATATTTGATCATAAATTAGTTTATAT	112	11	Sub	N/A
1394	GCTGATGCTGGACATACACCTATATTATTGGAAGCTAGAGATGTTCTGGGAGGAAAGGTCTATA---TGTTAATTCATAATATATTTTT--------ATATTCGATCATAAATTAGTTTATAT	GCTGATGCTGGACATACACCTATATTATTGGAAGCTAGAGATGTTCTGGGGGGAAAGGCCTATATACTGTT-ATTCATAATA---TTTTCGAACACAATATTTGATCATAAATTAGTTTATAT	119	11	Ins	N/A
1395	GCTGATGCTGGACATACACCTATATTATTGGAAGCTAGAGATGTTCTGGGAGGAAAGGTCTATATGTTAATTCATAATATATTTTTATATTCGATCATAAATTAGTTTATAT	GCTGATGCTGGACATACACCTATATTATTGGAAGCTACAGATGTTCTGGGAGGAAAGGTCTATATGTTAATTCATAATATATTTTTATATTCGATCATAAATTAGTTTATAT	112	11	Sub	N/A
1396	GCTGATGCTGGACATACACCTATATTATTGGAAGCTAGAGATGTTCTGGGAGGAAAGGTCTATATGTTAATTCATAATATATTTTTATATTCGATCATAAATTAGTTTATAT	GCTGATGCTGGACATACACCTATATGATTGGAAGCTAGAGATGTTTTAGGAGGAAAGGTCTATATGTTAATTCATAATATATTTTTATATTCGATCATAAATTAGTTTATAT	112	11	Sub	N/A
1397	GCTGATGCTGGACATACACCTATATTATTGGAAGCTAGAGATGTTCTGGGAGGAAAGGTCTATA---TGTTAATTCATAATATATTTTT--------ATATTCGATCATAAATTAGTTTATAT	GCTGATGCTGGACATACACCTATATTATTGGAAGCTAGAGATGTTCTGGGGGGAAGGGTCTATATACTGTT-ATTCATAATA---TTTTCGAACACAATATTTGATCATAAATTAGTTTATAT	119	11	Ins	N/A
1398	GCTGATGCTGGACATACACCTATATTATTGGAAGCTAGAGATGTTCTGGGAGGAAAGGTCTATATGTTAATTCATAATATATTTTTATATTCGATCATAAATTAGTTTATAT	GCGGATGCTGGACATACACCTATATTATTGGAAGCTAGAGATGTTTTAGGAGGAAAGGTCTATATGTTAATTCATAATATATTTTTATATTCGATCATAAATTAGTTTATAT	112	11	Sub	N/A
1399	GCTGATGCTGGACATACACCTATATTATTGGAAGCTAGAGATGTTCTGGGAGGAAAGGTCTATATGTTAATTCATAATATATTTTTATATTCGATCATAAATTAGTTTATAT	GCTGATGCTGGACATACACCTATATTATTGGAAGCTAGACATGTTCTGGGAGGAAAGGTCTATATGTTAATTCATAATATATTTTTATATTCGATCATAAATTAGTTTATAT	112	11	Sub	N/A
1400	GCTGATGCTGGACATACACCTATATTATTGGAAGCTAGAGATGTTCTGGGAGGAAAGGTCTATA---TGTTAATTCATAATATATTTTT--------ATATTCGATCATAAATTAGTTTATAT	GCTGATGCTGGACATACACCTATATTGTTGGAAGCTAGAGATGTTCTGGGGGGAAAGGTCTATATACTGTT-ATTCATAATA---TTTTCGAACACAATATTTGATCATAAATTAGTTTATAT	119	11	Ins	N/A
1401	GCTGATGCTGGACATACACCTATATTATTGGAAGCTAGAGATGTTCTGGGAGGAAAGGTCTATA---TGTTAATTCATAATATATTTTT--------ATATTCGATCATAAATTAGTTTATAT	GCTGATGCTGGACATACACCTATATTATTGGAAGCTAGAGATGTTCTGGGGGGAAAGGTCTATATACTGTT-ATTCATAATA---TTTTCGAACACAATATCTGATCATAAATTAGTTTATAT	119	11	Ins	N/A
1402	GCTGATGCTGGACATACACCTATATTATTGGAAGCTAGAGATGTTCTGGGAGGAAAGGTCTATATGTTAATTCATAATATATTTTTATA-TTCGATCATAAATTAGTTTATAT	GCTGATGTTGGACATACACCTATATTATTGGAAGCTAGAGATGTTTTAGGAGGAAAGGTC----------TTCATAATATATTTTTATATTTTGATCATAAATTAGTTTATAT	103	11	del	N/A
1403	GCTGATGCTGGACATACACCTATATTATTGGAAGCTAGAGATGTTCTGGGAGGAAAGGTCTATATGTTAATTCATAATATATTTTTATATTCGATCATAAATTAGTTTATAT	GCGGATGCTGGACATACACCTATATTATTGGAAGCTAGAGATGTTCTGGGAGGAAAGGTC----------TTCATAATATATTTTTATATTTGATCATAAATTAGTTTATAT	102	11	del	N/A
1404	GCTGATGCTGGACATACACCTATATTATTGGAAGCTAGAGATGTTCTGGGAGGAAAGGTCTATATGTTAATTCATAATATATTTTTATATTCGATCATAAATTAGTTTATAT	GTTGATGCTGGACATACACCTATACTATTGGAAGCTAGAGATGTTTTAGGAGGAAAGGTC----------TTCATAATATGTTTTTATATTTGATCATAAATTAGTTTATAT	102	11	del	N/A
1405	GCTGATGCTGGACATACACCTATATTATTGGAAGCTAGAGATGTTCTGGGAGGAAAGGTCTATATGTTAATTCATAATATATTTTTATATTCGATCATAAATTAGTTTATAT	GCTGATGCTGGACATACACCTATATTATTGGAAGCTAGAGATGTTTTAGGAGGAAATGTC----------TTCATAATATATTTTTATATTTGATCATAGATTAGTTTATAT	102	11	del	N/A
1406	GCTGATGCTGGACATACACCTATATTATTGGAAGCTAGAGATGTTCTGGGAGGAAAGGTCTATATGTTAATTCATAATATATTTTTATATTCGATCATAAATTAGTTTATAT	GCTGATGCTGGACATACACCTATCCTATTGGAAGCTAGAGATGTTTTAGGAGGAAAGGTC----------TTCATAATATGTTTTTATATTTGATCATAAATTAGTTTATAT	102	11	del	N/A
1407	GCTGATGCTGGACATACACCTATATTATTGGAAGCTAGAGATGTTCTGGGAGGAAAGGTCTATATGTTAATTCATAATATATTTTTATATTCGATCATAAATTAGTTTATAT	GCTGATGCTGGACATACACCTATCTTATTGGAAGCTAGATATGTTCTGGGAGGAAAGGTCTATATGTTAATTCATAATATATTTTTATATTCGATCATAAATTAGTTTATAT	112	11	Sub	N/A
1408	GCTGATGCTGGACATACACCTATATTATTGGAAGCTAGAGATGTTCTGGGAGGAAAGGTCTATATGTTAATTCATAATATATTTTTATATTCGATCATAAATTAGTTTATAT	GCTGATGCTGGACATACACCTATATTATTGGACGCTAGAGATGTTTTAGGAGGAAAGGTC----------TTCATAATATATTTTTGTATTTGATCATAAATTAGTTTATAT	102	11	del	N/A
1409	GCTGATGCTGGACATACACCTATATTATTGGAAGCTAGAGATGTTCTGGGAGGAAAGGTCTATATGTTAATTCATAATATATTTTTATATTCGATCATAAATTAGTTTATAT	GCTGATGCTGGACATACACCTATATTATTGGAAGCTAGAGATGTTTTAGGAGGAAAGGTC----------TTCATAATATATTTTTATATTTGATCATAAATTCGTTTATAT	102	11	del	N/A
1410	GCTGATGCTGGACATACACCTATATTATTGGAAGCTAGAGATGTTCTGGGAGGAAAGGTCTATATGTTAATTCATAATATATTTTTATATTCGATCATAAATTAGTTTATAT	GCTGATGCTGGACATACACCTATATTATTAGAAGCTAAAGATGTTCTATGAGGAAAGGTC----------TTCATAATATATTTTTATATTTGATCATAAATTAGTTTATAT	102	11	del	N/A
1411	GCTGATGCTGGACATACACCTATATTATTGGAAGCTAGAGATGTTCTGGGAGGAAAGGTCTATATGTTAATTCATAATATATTTTTATATTCGATCATAAATTAGTTTATAT	GCTGATGCTGGACAAACACCTATATTATTGGAAGCTAGAGATGTTTTAGGAGGAAAGGTC----------TTCATAATATATTTTTATATTTGATCATAAATTAGTTTATAT	102	11	del	N/A
1412	GCTGATGCTGGACATACACCTATATTATTGGAAGCTAGAGATGTTCTGGGAGGAAAGGTCTATA---TGTTAATTCATAATATATTTTT--------ATATTCGATCATAAATTAGTTTATAT	GCTGATGCTGGACATACACCTATATTATTGGAAGCTAGAGATGTTCTGGGGGGAAAGGTCTATATACTGTT-ATTCATAATA---TTTTCGAACACAATATTTGGTCATAAATTAGTTTATAT	119	11	Ins	N/A
1413	GCTGATGCTGGACATACACCTATATTATTGGAAGCTAGAGATGTTCTGGGAGGAAAGGTCTATATGTTAATTCATAATATATTTTTATATTCGATCATAAATTAGTTTATAT	GCTGATGCTGGACATACACCTATATTAGTGGAAGCGAGAGATGTTCTGGGAGGAAAGGTCTATATGTTAATTCATAATATATTTTTATATTCGATCATAAATTAGTTTATAT	112	11	Sub	N/A
1414	GCTGATGCTGGACATACACCTATATTATTGGAAGCTAGAGATGTTCTGGGAGGAAAGGTCTATATGTTAATTCATAATATATTTTTATATTCGATCATAAATTAGTTTATAT	GCTGATGCTGGACATACACCTATATTATTGGAAGCTAGAGATGTTCTGGGAGGAAAGGTCTATATGTTAATTCATAATATATTTTTATACTCGATCATAAATTAGTTTGTAT	112	11	Sub	N/A
1415	GCTGATGCTGGACATACACCTATATTATTGGAAGCTAGAGATGTTCTGGGAGGAAAGGTCTATATGTTAATTCATAATATATTTTTATATTCGATCATAAATTAGTTTATAT	GCTGATGCTGGACATACACCTATATTATTGGAAGCTAGAGATGTTTTAGGAGGAGATGTC----------TTCATAATATATTTTTATATTTGATCATAAATTAGTTTATAT	102	11	del	N/A
1416	GCTGATGCTGGACATACACCTATATTATTGGAAGCTAGAGATGTTCTGGGAGGAAAGGTCTATA---TGTTAATTCATAATATATTTTT--------ATATTCGATCATAAATTAGTTTATAT	GCTGATGCTGGACATACACCTATATTATTGGAAGCTAGAGATGTTCTGGGGGGAAAGGTCTATATACTGTT-ATTCATAATA---TTTTCGAACACAATATTTGATCATAAACTAGTTTATAT	119	11	Ins	N/A
1417	GCTGATGCTGGACATACACCTATATTATTGGAAGCTAGAGATGTTCTGGGAGGAAAGGTCTATATGTTAATTCATAATATATTTTTATATTCGATCATAAATTAGTTTATAT	GCTGATGCTGGACATACACCTATACTCTTGGAAGCTAGAGATGTTTTAGGAGGAAAGGTC----------TTCATAATATGTTTTTATATTTGATCATAAATTAGTTTATAT	102	11	del	N/A
1418	GCTGATGCTGGACATACACCTATATTATTGGAAGCTAGAGATGTTCTGGGAGGAAAGGTCTATATGTTA--ATTCATAATATATTTTT--------ATATTCGATCATAAATTAGTTTATAT	GCTGATGCTGGACATACACCTATATTATTGGAAGCTAGAGATGTTCTGGGGGGAAAGGTCTATATACTATTATTCATAATA---TTTTCGAACACAATATTTGATCATAAATTAGTTTATAT	119	11	Ins	N/A
1419	GCTGATGCTGGACATACACCTATATTATTGGAAGCTAGAGATGTTCTGGGAGGAAAGGTCTATA---TGTTAATTCATAATATATTTTT--------ATATTCGATCATAAATTAGTTTATAT	GCTGATGCTGGACTTACACCTATATTATTGGAAGCTAGAGATGTTCTGGGGGGAAAGGTCTATACACTGTT-ATTCATAATA---TTTTCGAACACAATATTTGATCATAAGTTAGTTTATAT	119	11	Ins	N/A
1420	GCTGATGCTGGACATACACCTATATTATTGGAAGCTAGAGATGTTCTGGGAGGAAAGGTCTATATGTTAATTCATAATATATTTTTATA-TTCGATCATAAATTAGTTTATAT	GCTGATGCTGGACATACATCTATATTATTGGAAGCTAGAGATGTTTTAGGAGGAAAGGTC----------TTCATAATATATTTTTATATTTTGATCATAAATTAGTTTATAT	103	11	del	N/A
1421	GCTGATGCTGGACATACACCTATATTATTGGAAGCTAGAGATGTTCTGGGAGGAAAGGTCTATA---TGTTAATTCATAATATATTTTT--------ATATTCGATCATAAATTAGTTTATAT	GCTGATGCTGGACATACACCTATATTATTGGAAGCTAGAGATGTTCTGAGGGGAAAGGTCTATATACTGTT-ATTCATAATA---TTTTCGAACACAATATTTGATCATAAATTAGTTTATAT	119	11	Ins	N/A
1422	GCTGATGCTGGACATACACCTATATTATTGGAAGCTAGAGATGTTCTGGGAGGAAAGGTCTATATGTTAATTCATAATATATTTTTATATTCGATCATAAATTAGTTTATAT	GCTGATGCTGGACATACACCTATATTATTGGAAGCTAGAGATGTTTTAGGAGGAAATGTC----------TTCATAATACATTTTTATATTTGTTCATAAATTAGTTTATAT	102	11	del	N/A
1423	GCTGATGCTGGACATACACCTATATTATTGGAAGCTAGAGATGTTCTGGGAGGAAAGGTCTATATGTTAATTCATAATATATTTTTATATTCGATCATAAATTAGTTTATAT	GCTGATGCTGGACATACACCTATATTATTGGAAGCTAGAGATGTTTTAGGAGGAAATGTC----------TTCATAATACATTTTTATATTTGATCCTAAATTAGTTTATAT	102	11	del	N/A
1424	GCTGATGCTGGACATACACCTATATTATTGGAAGCTAGAGATGTTCTGGGAGGAAAGGTCTATATGTTAATTCATAATATATTTTTATATTCGATCATAAATTAGTTTATAT	GCTGATGCTGGATATACACCTATATTATTGGAAGCTAGAGATGTTCTGGGAGGAAAGGTCTATATGTTAATTCATAATATATTTTTATATTTGATCATAAATTAGTTTATAT	112	11	Sub	N/A
1425	GCTGATGCTGGACATACACCTATATTATTGGAAGCTAGAGATGTTCTGGGAGGAAAGGTCTATATGTTAATTCATAATATATTTTTATATTCGATCATAAATTAGTTTATAT	GCTGATGCTGGCCATACCCCTATATTATTGGAAGCTAGAGATGTTCTGGGAGGAAAGGTCTATATGTTAATTCATAATATATTTTTATATTCGATCATAAATTAGTTTATAT	112	11	Sub	N/A
1426	GCTGATGCTGGACATACACCTATATTATTGGAAGCTAGAGATGTTCTGGGAGGAAAGGTCTATATGTTAATTCATAATATATTTTTATATTCGATCATAAATTAGTTTATAT	GCGGATGCTGGACATACACCTATATTATTGGAAGCGAGAGATGTTCTGGGAGGAAAGGTCTATATGTTAATTCATAATATATTTTTATATTCGATCATAAATTAGTTTATAT	112	11	Sub	N/A
1427	GCTGATGCTGGACATACACCTATATTATTGGAAGCTAGAGATGTTCTGGGAGGAAAGGTCTATATGTTAATTCATAATATATTTTTATATTCGATCATAAATTAGTTTATAT	GCTGATGCTGGGCATACACCTATATTATTGGAAGCTAGAGATGTTCTGGGAGGAAAGGTC----------TTCATAATATATTTTTATATTTGATCATAAATTAGTTTATAT	102	11	del	N/A
1428	GCTGATGCTGGACATACACCTATATTATTGGAAGCTAGAGATGTTCTGGGAGGAAAGGTCTATATGTTAATTCATAATATATTTTTATA-TTCGATCATAAATTAGTTTATAT	GCTGAAGCTGGACATACACCTATATTATTGGAAGCTAGAGATGTTTTAGGAGGAAAGGTC----------TTCATAATATATTTTTATATTTTGATCATAAATTAGTTTATAT	103	11	del	N/A
1429	GCTGATGCTGGACATACACCTATATTATTGGAAGCTAGAGATGTTCTGGGAGGAAAGGTCTATATGTTAATTCATAATATATTTTTATATTCGATCATAAATTAGTTTATAT	GCTGATGCTGGACATACACCTATATGATTGGAAGCTAGAGATGTTTTAGGAGGAAAGGTC----------TTCATAATATATTTTTATATTCGATCATAAATTAGTTTATAT	102	11	del	N/A
1430	GCTGATGCTGGACATACACCTATATTATTGGAAGCTAGAGATGTTCTGGGAGGAAAGGTCTATATGTTAATTCATAATATATTTTTAT-ATTCGATCATAAATTAGTTTATAT	GCTGATGCTGGACATACACCTATATTATTGGAAGCTAGAGATGTTTTAGGAGGAAAGGTC----------TTCATAATATATTTTTATCTTTTGATCATAAATTAGTTTATAT	103	11	del	N/A
1431	GCTGATGCTGGACATACACCTATATTATTGGAAGCTAGAGATGTTCTGGGAGGAAAGGTCTATATGTTAATTCATAATATATTTTTATATTCGATCATAAATTAGTTTATAT	GCTGATGCTGGACATACACCTATATTAATGGACGCTAGAGATGTTCTGGGAGGAAAGGTCTATATGTTAATTCATAATATATTTTTATATTCGATCATAAATTAGTTTATAT	112	11	Sub	N/A
1432	GCTGATGCTGGACATACACCTATATTATTGGAAGCTAGAGATGTTCTGGGAGGAAAGGTCTATATGTTAATTCATAATATATTTTTATATTCGATCATAAATTAGTTTATAT	GCTGATGCTGGACCTACACCTATATTATTGGAAGCTAGAGATGTTGTAGGAGGAAATGTC----------TTCATAATACATTTTTATATTTGATCATAAATTAGTTTATAT	102	11	del	N/A
1433	GCTGATGCTGGACATACACCTATATTATTGGAAGCTAGAGATGTTCTGGGAGGAAAGGTCTATATGTTAATTCATAATATATTTTTATATTCGATCATAAATTAGTTTATAT	GCTGAAGCTGGACATACACCTATATAATTGGAAGCTAGAGATGTTTTAGGAGGAAAGGTC----------TTCATAATATATTTTTATATTTGATCATAAATTAGTTTATAT	102	11	del	N/A
1434	GCTGATGCTGGACATACACCTATATTATTGGAAGCTAGAGATGTTCTGGGAGGAAAGGTCTATATGTTAATTCATAATATATTTTTATATTCGATCATAAATTAGTTTATAT	GCTGAAGCTGGACATACACCTATATCATTGGAAGCTAGAGATGTTTTAGGAGGAAATGTC----------TTCATAATACATTTTTATATTTGATCATAAATTAGTTTATAT	102	11	del	N/A
1435	GCTGATGCTGGACATACACCTATATTATTGGAAGCTAGAGATGTTCTGGGAGGAAAGGTCTATATGTTAATTCATAATATATTTTTATATTCGATCATAAATTAGTTTATAT	GCTGATGCTGGACATACACCTATATTATTGGAAGCTAGAGATGTTTTAGGAGGAAATGTC----------TTCATAATACATTTTTATATTTGATCATAATTTAGTTTATAT	102	10	del	N/A
1436	GCTGATGCTGGACATACACCTATATTATTGGAAGCTAGAGATGTTCTGGGAGGAAAGGTCTATATGTTAATTCATAATATATTTTTATATTCGATCATAAATTAGTTTATAT	GCTGATGCTGGCCATACACCTATATTATTGGAAGCTAGAGATGTTTTAGGAGGAAAGGTC----------TTCATAATATATTTTTGTATTTGATCATAAATTAGTTTATAT	102	10	del	N/A
1437	GCTGATGCTGGACATACACCTATATTATTGGAAGCTAGAGATGTTCTGGGAGGAAAGGTCTATATGTTAATTCATAATATATTTTTATATTCGATCATAAATTAGTTTATAT	GCTGATGCTGGACATACACCTATATTATTGGAAGCGAGAGATGTTCGGGGAGGAAAGGTCTATATGTTAATTCATAATATATTTTTATATTCGATCATAAATTAGTTTATAT	112	10	Sub	N/A
1438	GCTGATGCTGGACATACACCTATATTATTGGAAGCTAGAGATGTTCTGGGAGGAAAGGTCTATATGTTAATTCATAATATATTTTTATATTCGATCATAAATTAGTTTATAT	GCTGATGCCGGACATACACCTATATTATTGGAAGCTAGAGATGTTTTAGGAGGAAATGTC----------TTCATAATATATTTTTATATTTGATCATAAATTAGTTTATAT	102	10	del	N/A
1439	GCTGATGCTGGACATACACCTATATTATTGGAAGCTAGAGATGTTCTGGGAGGAAAGGTCTATATGTTAATTCATAATATATTTTTATATTCGATCATAAATTAGTTTATAT	GCTGATGCTGGACATACACCTATATTATTGGAAGCTAGAGATGTTCTGGGAGGAAAGGTCTATATGTTAATTCAAACTATATTTTTACATTCGATCATAAATTAGTTTATAT	112	10	Sub	N/A
1440	GCTGATGCTGGACATACACCTATATTATTGGAAGCTAGAGATGTTCTGGGAGGAAAGGTCTATATGTTAATTCATAATATATTTTTATATTCGATCATAAATTAGTTTATAT	GCTGATGCTGGACATACACCTATATTATTGGTAGTTAGAGATGTTTTAAGAGGAAAGGTC----------TTCATAATACATTTTTATATTTGATCATAAATTAGTTTATAT	102	10	del	N/A
1441	GCTGATGCTGGACATACACCTATATTATTGGAAGCTAGAGATGTTCTGGGAGGAAAGGTCTATATGTTAATTCATAATATATTTTTATATTCGATCATAAATTAGTTTATAT	GCTGATGCTGGACATACACCTATATTATTGGAAGCTAGAGATGTTATAGGAGGAAATGTC----------TTCATAATATATTTTTATATTTGATCATAAATTAGTTTATAT	102	10	del	N/A
1442	GCTGATGCTGGACATACACCTATATTATTGGAAGCTAGAGATGTTCTGGGAGGAAAGGTCTATA---TGTTAATTCATAATATATTTTTA------TATTCGATCATAAATTAGTTTATAT	GCTGATGCTGGACATACACCTATATTATTGGAAGCTAGAGATGTTCTGGGGGGAAAGGTCTATATACTGTT-ATTCATAATAT-TTTCGAACACAGTATTTGATCATAAATTAGTTTATAT	119	10	Ins	N/A
1443	GCTGATGCTGGACATACACCTATATTATTGGAAGCTAGAGATGTTCTGGGAGGAAAGGTCTATATGTTAATTCATAATATATTTTTATA-TTCGATCATAAATTAGTTTATAT	GCTGATGCTGGACATACACCTATATTATTGGATGCTAGAGATGTTTTAGGAGGAAAGGTC----------TTCATAATATATTTTTATATTTTGATCATAAATTAGTTTATAT	103	10	del	N/A
1444	GCTGATGCTGGACATACACCTATATTATTGGAAGCTAGAGATGTTCTGGGAGGAAAGGTCTATATGTTAATTCATAATATATTTTTATATTCGATCATAAATTAGTTTATAT	GCTGATGCTGGACATACACCTATATTATTGGAAGCTAGAGATGTTTTAGGAGGAAATGTC----------TTCATAATATACTTTTATATTTGATCATAAATTAGTTTATAT	102	10	del	N/A
1445	#NAME?	GCTGATGCTGGACATACACCGCTGATGCTGGACATACACCGCTGATGCTGGACATACACCGCTGATGCTGGACATACACCGCTGATGCTGGACATACACCTATATTATTGGAAGCTAGAGATGTTCTGGGAGGAAAGGTCTATATGTTAATTCATAATATATTTTTATATTCGATCATAAATTAGTTTATAT	192	10	Ins	N/A
1446	GCTGATGCTGGACATACACCTATATTATTGGAAGCTAGAGATGTTCTGGGAGGAAAGGTCTATATGTTAATTCATAATATATTTTTATATTCGATCATAAATTAGTTTATAT	GCTGATGCTGGACATACACCTATATTATTGGAAGCTAGAGATGTTCTGGGAGGAAAGGTCTATATGATAATTCATAATATATTTTTATATTCGATCATAAATTAGTTTATAT	112	10	Sub	N/A
1447	GCTGATGCTGGACATACACCTATATTATTGGAAGCTAGAGATGTTCTGGGAGGAAAGGTCTATATGTTAATTCATAATATATTTTTATATTCGATCATAAATTAGTTTATAT	GCTGATGCTGGACATACACCTATATTATTGGAAGCTAGAGATGTTCTCGGAGGAAAGGTCTATATGTTAATTCATAATATATTTTTATATTCGATCATAAATTAGTTTATAT	112	10	Sub	N/A
1448	GCTGATGCTGGACATACACCTATATTATTGGAAGCTAGAGATGTTCTGGGAGGAAAGGTCTATA---TGTTAATTCATAATATATTTTT--------ATATTCGATCATAAATTAGTTTATAT	GCTGATGCTGGACATACACCTAGATTATTGGAAGCTAGAGATGTTCTGGGGGGAAAGGTCTATATACTGTT-ATTCATAATA---TTTTCGAACACAATATTTGATCATAAATTAGTTTATAT	119	10	Ins	N/A
1449	GCTGATGCTGGACATACACCTATATTATTGGAAGCTAGAGATGTTCTGGGAGGAAAGGTCTATATGTTAATTCATAATATATTTTTATATTCGATCATAAATTAGTTTATAT	GCTGATGCTGGACATACACCTATATTATTGGAAGCTAGAGATGTTTTAGGAGGAAAGGTC----------TTCATAATATATTTTTATATTTGATCATAAATTAGTTTATAG	102	10	del	N/A
1450	GCTGATGCTGGACATACACCTATATTATTGGAAGCTAGAGATGTTCTGGGAGGAAAGGTCTATATGTTAATTCATAATATATTTTT--------ATATTCGATCATAAATTAGTTTATAT	GCTGATGCTGGACATACACCTATATTATTGGAAGCTAGAGATGTTCTGGGGGGAAAGGTCTATATGTTAATTCATAATA---TTTTCGAACACAATATTTGATCATAAATTAGTTTATAT	117	10	Ins	N/A
1451	GCTGATGCTGGACATACACCTATATTATTGGAAGCTAGAGATGTTCTGGGAGGAAAGGTCTATATGTTAATTCATAATATATTTTTATATTCGATCATAAATTAGTTTATAT	GCTGATGCTGGACATACACCTATACTATTGGAAGCTAGAGATGTTTTAGGAAGAAAGGTC----------TTCATAATATGTTTTTATATTTGATCATAAATTAGTTTATAT	102	10	del	N/A
1452	GCTGATGCTGGACATACACCTATATTATTGGAAGCTAGAGATGTTCTGGGAGGAAAGGTCTATA---TGTTAATTCATAATATATTTTT--------ATATTCGATCATAAATTAGTTTATAT	GCTGATGCTGGACATACACCTATATTATTGGAAGCTAGAGATGTTCTGGGGGGAAAGGTCTATATACTGTT-GTTCATAATA---TTTTCGAACACAATATTTGATCATAAATTAGTTTATAT	119	10	Ins	N/A
1453	GCTGATGCTGGACATACACCTATATTATTGGAAGCTAGAGATGTTCTGGGAGGAAAGGTCTATATGTTAATTCATAATATATTTTTATATTCGATCATAAATTAGTTTATAT	GCTGATGCTGGACATACACCTATATTATTGGAAGCTAGAGATGTTCTGGGAGGAAAGGTCTATATGTTAATTCATAATATATTTTTATATTCGATCAAAAATTAGTTTATAT	112	10	Sub	N/A
1454	GCTGATGCTGGACATACACCTATATTATTGGAAGCTAGAGATGTTCTGGGAGGAAAGGTCTATATGTTAATTCATAATATATTTTTATATTCGATCATAAATTAGTTTATAT	GCTGATGCTGGACATCCACCTCTATTATTGGAAGCTAGAGATGTTTTAGGAGGAAAGGTC----------TTCATAATATATTTTTATATTTGATCATAAATTAGTTTATAT	102	10	del	N/A
1455	GCTGATGCTGGACATACACCTATATTATTGGAAGCTAGAGATGTTCTGGGAGGAAAGGTCTATATGTTAATTCATAATATATTTTTATATTCGATCATAAATTAGTTTATAT	GCTGATGCTGGACATACACCTATATTATTGGAAGCTAGAGATGTTTTAGGAGGAAAGGTC----------TTCCTAATATATTTTTATATTTGATCATAAATTAGTTTATAT	102	10	del	N/A
1456	GCTGATGCTGGACATACACCTATATTATTGGAAGCTAGAGATGTTCTGGGAGGAAAGGTCTATATGTTAATTCATAATATATTTTTATATTCGATCATAAATTAGTTTATAT	GCTGATGCTGGACATACACCTATATTATTGGAAGCTAGAGATGTTTTAGGAGGAAAGGTC----------TTCATAATATATTTTTATAATTGATCATAAATTAGTTTATAT	102	10	del	N/A
1457	GCTGATGCTGGACATACACCTATATTATTGGAAGCTAGAGATGTTCTGGGAGGAAAGGTCTATATGTTAATTCATAATATATTTTTATATTCGATCATAAATTAGTTTATAT	GCTGATGCTGGACATACACCTATATTATTGGAAGCTAGAGATGTTTTAGGAGGAAATGTC----------TTCAAAATACATTTTTATATTTGATCATAAATTAGTTTATAT	102	10	del	N/A
1458	GCTGATGCTGGACATACACCTATATTATTGGAAGCTAGAGATGTTCTGGGAGGAAAGGTCTATATGTTAATTCATAATATATTTTTATATTCGATCATAAATTAGTTTATAT	GCTGATGCTGGACATACACCTATATTATTTGAAGCTAGAGATGTTTTAGGAGGAAAGGTCTATATGTTAATTCATAATATATTTTTATATTCGATCATAAATTAGTTTATAT	112	10	Sub	N/A
1459	GCTGATGCTGGACATACACCTATATTATTGGAAGCTAGAGATGTTCTGGGAGGAAAGGTCTATATGTTAATTCATAATATATTTTTATATTCGATCATAAATTAGTTTATAT	GCTGATTCTGGACATACACCTATACTATTGGAAGCTAGAGATGTTTTAGGAGGAAAGGTC----------TTCATAATATGTTTTTATATTTGATCATAAATTAGTTTATAT	102	10	del	N/A
1460	GCTGATGCTGGACATACACCTATATTATTGGAAGCTAGAGATGTTCTGGGAGGAAAGGTCTATATGTTAATTCATAATATATTTTTATATTCGATCATAAATTAGTTTATAT	GCTGATGCTGGACATACACCTATATTATTGGAAGCTAGAGATGTTTTAGGAGGAA--------ATGTT--TTCATAATATATTTTTATATTTGATCATAAATTAGTTTATAT	102	10	del	N/A
1461	GCTGATGCTGGACATACACCTATATTATTGGAAGCTAGAGATGTTCTGGGAGGAAAGGTCTATATGTTAATTCATAATATATTTTTATATTCGATCATAAATTAGTTTATAT	GCTGATGCTGGACATACACCTATATTATTGGAAGCTAGAGATGTTTTAGGAGGAAATGTC----------TTCATAATACATTTTTATATTTGATCATAAATTAGGTTATAT	102	10	del	N/A
1462	GCTGATGCTGGACATACACCTATATTATTGGAAGCTAGAGATGTTCTGGGAGGAAAGGTCTATATGTTAATTCATAATATATTTTTATA-TTCGATCATAAATTAGTTTATAT	GCTGATGCTGGACATACACCTATATTATTGGAAGCTAGAGATGTTTTAGGAGGAAAGGTC----------CTCATAATATATTTTTATATTTTGATCATAAATTAGTTTATAT	103	10	del	N/A
1463	GCTGATGCTGGACATACACCTATATTATTGGAAGCTAGAGATGTTCTGGGAGGAAAGGTCTATATGTTAATTCATAATATATTTTTATATTCGATCATAAATTAGTTTATAT	GCTGATGCTGGACATACACCTATATGATTGGAAGCGAGAGATGTTCTGGGAGGAAAGGTCTATATGTTAATTCATAATATATTTTTATATTCGATCATAAATTAGTTTATAT	112	10	Sub	N/A
1464	GCTGATGCTGGACATACACCTATATTATTGGAAGCTAGAGATGTTCTGGGAGGAAAGGTCTATA---TGTTAATTCATAATATATTTTT--------ATATTCGATCATAAATTAGTTTATAT	GCTGATGCTGGACATACACCTATATTATTGGAAGCTAGAGATGTTCTGGGGGGAAAGGTCTATATACTGTT-ATTCATAATA---TTTTCGAACACAATTTTTGATCATAAATTAGTTTATAT	119	10	Ins	N/A
1465	GCTGATGCTGGACATACACCTATATTATTGGAAGCTAGAGATGTTCTGGGAGGAAAGGTCTATATGTTAATTCATAATATATTTTTATATTCGATCATAAATTAGTTTATAT	GCTGATGCTGGACATACACCTATATTATTGGCAGCTAGAGATGTTTTAAGAGGAAAGGTC----------TTCATAATATATTTTTATATTTGATCATAAATTAGTTTATAT	102	10	del	N/A
1466	GCTGATGCTGGACATACACCTATATTATTGGAAGCTAGAGATGTTCTGGGAGGAAAGGTCTATA---TGTTAATTCATAATATATTTTT--------ATATTCGATCATAAATTAGTTTATAT	GCTGATGCTGGACATACACCTATATTATTGGAAGCTAGAGATGTTCTCGGGGGAAAGGTCTATATACTGTT-ATTCATAATA---TTTTCGAACACAATATTTGATCATAAATTAGTTTATAT	119	10	Ins	N/A
1467	GCTGATGCTGGACATACACCTATATTATTGGAAGCTAGAGATGTTCTGGGAGGAAAGGTCTATATGTTAATTCATAATATATTTTTATATT-CGATCATAAATTAGTTTATAT	GCTGATGCTGGACATACACCTATATTATTGGAAGCTAGAGATGTTTTAGGAGGAAAGGTC----------TTCATAATATATTTTTATATTGTGATCATAAATTAGTTTATAT	103	10	del	N/A
1468	GCTGATGCTGGACATACACCTATATTATTGGAAGCTAGAGATGTTCTGGGAGGAAAGGTCTATATGTTAATTCATAATATATTTTTATATTCGATCATAAATTAGTTTATAT	GCTGATGCTGGACATACACCTATATTATTGGAAGCTAGAGATGTTTTCGGAGGAAATGTC----------TTCATAATACATTTTTATATTTGATCATAAATTAGTTTATAT	102	10	del	N/A
1469	GCTGATGCTGGACATACACCTATATTATTGGAAGCTAGAGATGTTCTGGGAGGAAAGGTCTATATGTTAATTCATAATATATTTTTATATTCGATCATAAATTAGTTTATAT	GCTGATGCTGGGCATACACCTATATTATTGGAAGCTAGAGATGTTTTAGGAGGAAAGGTC----------TTCATAATACATTTTTATATTTGATCATAAATTAGTTTATAT	102	10	del	N/A
1470	GCTGATGCTGGACATACACCTATATTATTGGAAGCTAGAGATGTTCTGGGAGGAAAGGTCTATATGTTAATTCATAATATATTTTTATATTCGATCATAAATTAGTTTATAT	GCTGATGCTGGACATACACCTATATTATTGGAAGCTAGAGATGTTCTGGGGGGAAAGGTC----------TTCATAATATATTTTTGTATTTGATCATAAATTAGTTTATAT	102	10	del	N/A
1471	GCTGATGCTGGACATACACCTATATTATTGGAAGCTAGAGATGTTCTGGGAGGAAAGGTCTATATGTTAATTCATAATATATTTTTATATTCGATCATAAATTAGTTTATAT	GCGGATGCTGGACATACACCTATATTAGTGGAAGCTAGAGATGTTCTGGGAGGAAAGGTCTATATGTTAATTCATAATATATTTTTATATTCGATCATAAATTAGTTTATAT	112	10	Sub	N/A
1472	GCTGATGCTGGACATACACCTATATTATTGGAAGCTAGAGATGTTCTGGGAGGAAAGGTCTATATGTTAATTCATAATATATTTTTATATTCGATCATAAATTAGTTTATAT	GCTGATGCTGGACATACACCTATATTATTGGAAGCTAGAGATGTTTTAGGAGGAAATGTC----------TTCATAATATATTTTTATATTTGACCATAAATTAGTTTATAT	102	10	del	N/A
1473	GCTGATGCTGGACATACACCTATATTATTGGAAGCTAGAGATGTTCTGGGAGGAAAGGTCTATATGTTAATTCATAATATATTTTTATATTCGATCATAAATTAGTTTATAT	GCTGATGCTGGACATACACCTATATTATTGGAAGCTAGAGATGTTTTAGGAGGAAAGGTC----------TTCATAATATATTTTTATATTTGATCATAAATTAGTTTTTAT	102	10	del	N/A
1474	GCTGATGCTGGACATACACCTATATTATTGGAAGCTAGAGATGTTCTGGGAGGAAAGGTCTATATGTTAATTCATAATATATTTTTATATTCGATCATAAATTAGTTTATAT	GCTGAGGCTGGACATACACCTATATTATTGGAAGCTAGAGATGTTCTGGGGGGAAAGGTCTATATGTTAATTCATAATATATTTTTATATTCGATCATAAATTAGTTTATAT	112	10	Sub	N/A
1475	GCTGATGCTGGACATACACCTATATTATTGGAAGCTAGAGATGTTCTGGGAGGAAAGGTCTATATGTTAATTCATAATATATTTTTATATTCGATCATAAATTAGTTTATAT	GCTGAGGCTGGACATACACCTATATTATTGGAAGCTAGAGATGTTTTAGGAGGAAAGGTC----------TTCATAATATATTTTTATATTCGATCATAAATTAGTTTATAT	102	10	del	N/A
1476	GCTGATGCTGGACATACACCTATATTATTGGAAGCTAGAGATGTTCTGGGAGGAAAGGTCTATATGTTAATTCATAATATATTTTTATATTCGATCATAAATTAGTTTATAT	GCTGATGCTGGACATACACCTATATTATTGGAAGCTAGAGATGTTCTGGGAGGAAAGGTCTATATGTTAATTCTTAATATATTTTTATATTCGATCATAAATTAGTTTATAT	112	10	Sub	N/A
1477	GCTGATGCTGGACATACACCTATATTATTGGAAGCTAGAGATGTTCTGGGAGGAAAGGTCTATA---TGTTAATTCATAATATATTTTT--------ATATTCGATCATAAATTAGTTTATAT	GCTGATGCTAGACATACACCTATATTATTGGAAGCTAGAGATGTTCTGGGGGGAAAGGTCTATATACTGTT-ATTCATAATA---TTTTCGAACACAATATTTGATCATAAATTAGTTTATAT	119	10	Ins	N/A
1478	GCTGATGCTGGACATACACCTATATTATTGGAAGCTAGAGATGTTCTGGGAGGAAAGGTCTATATGTTAATTCATAATATATTTTTATATTCGATCATAAATTAGTTTATAT	GCTGATGCTGGACATAAACCTATATTATTGGAAGCTAGAGATGTTTTAGGAGGAAATGTC----------TTCATAATACATTTTTATATTTGATCATAAATTAGTTTATAT	102	10	del	N/A
1479	GCTGATGCTGGACATACACCTATATTATTGGAAGCTAGAGATGTTCTGGGAGGAAAGGTCTATATGTTAATTCATAATATATTTTTATA-TTCGATCATAAATTAGTTTATAT	GCTGATGCTGGACATACACCTATATTATTGGAAGCTAGAGATGTTTTAGGAGGAAAGGTC----------TTCATAGTATATTTTTATATTTTGATCATAAATTAGTTTATAT	103	10	del	N/A
1480	GCTGATGCTGGACATACACCTATATTATTGGAAGCTAGAGATGTTCTGGGAGGAAAGGTCTATATGTTAATTCATAATATATTTTTATATTCGATCATAAATTAGTTTATAT	GCTGATGCTGGTCATACACCTATATTATTGGAAGCTAGAGATGTTTTAGGAGGAAAGGTC----------TTCATAATATATTTTTGTATTTGATCATAAATTAGTTTATAT	102	10	del	N/A
1481	GCTGATGCTGGACATACACCTATATTATTGGAAGCTAGAGATGTTCTGGGAGGAAAGGTCTATATGTTAATTCATAATATATTTTTATA-TTCGATCATAAATTAGTTTATAT	GCTGATGCTGGACATACACTTATATTATTGGAAGCTAGAGATGTTTTAGGAGGAAAGGTC----------TTCATAATATATTTTTATATTTTGATCATAAATTAGTTTATAT	103	10	del	N/A
1482	GCTGATGCTGGACATACACCTATATTATTGGAAGCTAGAGATGTTCTGGGAGGAAAGGTCTATATGTTAATTCATAATATATTTTTATATTCGATCATAAATTAGTTTATAT	GCTGATGCTGGACATACACCTATATTATTGGAAGCTAAAGATGTTCTAGGAGGAAAGGTC----------TTCATAATACATTTTTATATTTGATCATAAATTAGTTTATAT	102	10	del	N/A
1483	GCTGATGCTGGACATACACCTATATTATTGGAAGCTAGAGATGTTCTGGGAGGAAAGGTCTATATGTTAATTCATAATATATTTTTATA-TTCGATCATAAATTAGTTTATAT	GCTGATGCTGGACATACACCTATATTATTGGAAGCAAGAGATGTTTTAGGAGGAAAGGTC----------TTCATAATATATTTTTATATTTTGATCATAAATTAGTTTATAT	103	10	del	N/A
1484	GCTGATGCTGGACATACACCTATATTATTGGAAGCTAGAGATGTTCTGGGAGGAAAGGTCTATATGTTAATTCATAATATATTTTTATATTCGATCATAAATTAGTTTATAT	GCTGATGCTGGACATACACCTATATTATTGGAAGCTAGAGATGGTTTAGGAGGAAATGTC----------TTCATAATATATTTTTATATTTGATCATAAATTAGTTTATAT	102	10	del	N/A
1485	GCTGATGCTGGACATACACCTATATTATTGGAAGCTAGAGATGTTCTGGGAGGAAAGGTCTATATGTTAATTCATAATATATTTTTATATTCGATCATAAATTAGTTTATAT	GCTGATGCTGGACATACACCTATATTATTGGTAGTTAGAGATGTTTTAGGAGGAAAGGTC----------TTCATAATATATTTTTATATTTGATCATAAATTAGTTTATAT	102	10	del	N/A
1486	GCTGATGCTGGACATACACCTATATTATTGGAAGCTAGAGATGTTCTGGGAGGAAAGGTCTATATGTTAATTCATAATATATTTTTATATTCGATCATAAATTAGTTTATAT	GCTGATGCTGGACATACACCTATATTATTGGAAGCTAGAGCTGTTTTAGGAGGAAATGTC----------TTCATAATATATTTTTATATTTGATCATAAATTAGTTTATAT	102	10	del	N/A
1487	GCTGATGCTGGACATACACCTATATTATTGGAAGCTAGAGATGTTCTGGGAGGAAAGGTCTATATGTTAATTCATAATATATTTTTATATTCGATCATAAATTAGTTTATAT	GCTGATGCTGGACATACACCTATATTATTGGAAGCCAGAGATGCTTTAGGAGGAAAGGTC----------TTCATAATATATTTTTATATTTGATCATAAATTAGTTTATAT	102	10	del	N/A
1488	GCTGATGCTGGACATACACCTATATTATTGGAAGCTAGAGATGTTCTGGGAGGAAAGGTCTATATGTTAATTCATAATATATTTTTATATTCGATCATAAATTAGTTTATAT	GCTGATGCTGGACCTACACCTATATTATTGGAAGCTAGAGATGTTTTAGGAGGAAATGTC----------TTCATAATACATTGTTATATTTGATCATAAATTAGTTTATAT	102	10	del	N/A
1489	GCTGATGCTGGACATACACCTATATTATTGGAAGCTAGAGATGTTCTGGGAGGAAAGGTCTATATGTTAATTCATAATATATTTTTATATTCGATCATAAATTAGTTTATAT	GCTGATGCTGGACATACACCTATACTATTGGAAGCTAGAGATGTTTTAGGAGGCAAGGTC----------TTCATAATATGTTTTTATATTTGATCATAAATTAGTTTATAT	102	10	del	N/A
1490	GCTGATGCTGGACATACACCTATATTATTGGAAGCTAGAGATGTTCTGGGAGGAAAGGTCTATATGTTAATTCATAATATATTTTTATATTCGATCATAAATTAGTTTATAT	GCTGATGCTGGACATACACCTATATGATTGGAAGCTAGAGATGTTCTGGGAGGAAAGGTCTATATGTTAATTCATAATATATTTTTATATTCGATCATTAATTAGTTTATAT	112	10	Sub	N/A
1491	GCTGATGCTGGACATACACCTATATTATTGGAAGCTAGAGATGTTCTGGGAGGAAAGGTCTATA---TGTTAATTCATAATATATTTTTA------TATTCGATCATAAATTAGTTTATAT	GCTGATGCTGGACATACACCTATATTATTGGAAGCTAGAGATGTTCTGGGGGGAAAGGTCTATATACTGTT-ATTCATAATAT-TTTCGAACACACTATTTGATCATAAATTAGTTTATAT	119	10	Ins	N/A
1492	GCTGATGCTGGACATACACCTATATTATTGGAAGCTAGAGATGTTCTGGGAGGAAAGGTCTATA---TGTTAATTCATAATATATTTTT--------ATATTCGATCATAAATTAGTTTATAT	GCTGATGCTGGACATACACCTATATTAGTGGAAGCTAGAGATGTTCTGGGGGGAAAGGTCTATACACTGTT-ATTCATAATA---TTTTCGAACACAATATTTGATCATAAGTTAGTTTATAT	119	10	Ins	N/A
1493	GCTGATGCTGGACATACACCTATATTATTGGAAGCTAGAGATGTTCTGGGAGGAAAGGTCTATATGTTAATTCATAATATATTTTTATATTCGATCATAAATTAGTTTATAT	GCTGATGCTGGACATACACCTATATTATTGGAAGCTAGAGATGTCTTAGGAGGAAATGTC----------TTCATAATATATTTTTATATTTGATCATAAATTAGTTTATAT	102	10	del	N/A
1494	GCTGATGCTGGACATACACCTATATTATTGGAAGCTAGAGATGTTCTGGGAGGAAAGGTCTATATGTTAATTCATAATATATTTTTATATTCGATCATAAATTAGTTTATAT	GATGATGCTGGACATACACCTATACTATTGGAAGCTAGAGATGTTTTAGGAGGAAAGGTC----------TTCATAATATGTTTTTATATTTGATCATAAATTAGTTTATAT	102	10	del	N/A
1495	GCTGATGCTGGACATACACCTATATTATTGGAAGCTAGAGATGTTCTGGGAGGAAAGGTCTATATGTTAATTCATAATATATTTTTATATTCGATCATAAATTAGTTTATAT	GCTGATGCTGGACATACACCTATATTATTGGAAGCTAGAGATGTGTTAGGAGGAAAGGTC----------TTCATAATATATTTTTCTATTTGATCATAAATTAGTTTATAT	102	10	del	N/A
1496	GCTGATGCTGGACATACACCTATATTATTGGAAGCTAGAGATGTTCTGGGAGGAAAGGTCTATATGTTAATTCATAATATATTTTTATATTCGATCATAAATTAGTTTATAT	GCTCATGCTGGACATACACCTATATTATTGGAAGCTAGAGATGTTTTAGGAGGAAAGGTC----------TTCATAATATATTTTTGTATTTGATCATAAATTAGTTTATAT	102	10	del	N/A
1497	GCTGATGCTGGACATACACCTATATTATTGGAAGCTAGAGATGTTCTGGGAGGAAAGGTCTATATGTTAATTCATAATATATTTTTATA-TTCGATCATAAATTAGTTTATAT	GCTGATGCTGGACATACACCTATATTATTGGAAGTTAGAGATGTTTTAGGAGGAAAGGTC----------TTCATAATATATTTTTATATTTTGATCATAAATTAGTTTATAT	103	10	del	N/A
1498	GCTGATGCTGGACATACACCTATATTATTGGAAGCTAGAGATGTTCTGGGAGGAAAGGTCTATATGTTAATTCATAATATATTTTTATATTCGATCATAAATTAGTTTATAT	GCTGATGCTGGACATACACCTATATTATTGGAAGATAGAGATGTTTTAGGAGGAAATGTC----------TCCATAATACATTTTTATATTTGATCATAAATTAGTTTATAT	102	10	del	N/A
1499	GCTGATGCTGGACATACACCTATATTATTGGAAGCTAGAGATGTTCTGGGAGGAAAGGTCTATATGTTAATTCATAATATATTTTTATATTCGATCATAAATTAGTTTATAT	GCTGATGCTGGACATACAGCTATATTATTGGAAGCTAGAGATGTTTTAGGAGGAAATGTC----------TTCATAATATATTTTTATATTTGATCATAAATTAGTTTATAT	102	10	del	N/A
1500	GCTGATGCTGGACATACACCTATATTATTGGAAGCTAGAGATGTTCTGGGAGGAAAGGTCTATATGTTAATTCATAATATATTTTTATATTCGATCATAAATTAGTTTATAT	GCTGATGCTGGACATACACGTATACTATTGGAAGCTAGAGATGTTTTAGGAGGAAAGGTC----------TTCATAATATGTTTTTATATTTGATCATAAATTAGTTTATAT	102	10	del	N/A
1501	GCTGATGCTGGACATACACCTATATTATTGGAAGCTAGAGATGTTCTGGGAGGAAAGGTCTATA---TGTTAATTCATAATATATTTTT--------ATATTCGATCATAAATTAGTTTATAT	GCTGATGCTGGACATACACATATATTATTGGAAGCTAGAGATGTTCTGGGGGGAAAGGTCTATATACTGTT-ATTCATAATA---TTTTCGAACACAATATTTGATCATAAATTAGTTTATAT	119	10	Ins	N/A
1502	GCTGATGCTGGACATACACCTATATTATTGGAAGCTAGAGATGTTCTG-GGAGGAAAGGTCTATATGTTAATTCATAATATATTTTTATATTCGATCATAAATTAGTTTATAT	GCTGATGCTGGACATACACCTATATTATTGGAAGCTAGAGATGTT-TGAGGAGGAAAGGTCTATATGTTAATTCATAATATATTTTTATATTCGATCATAAATTAGTTTATAT	112	10	Sub	N/A
1503	GCTGATGCTGGACATACACCTATATTATTGGAAGCTAGAGATGTTCTGGGAGGAAAGGTCTATATGTTAATTCATAATATATTTTTATATTCGATCATAAATTAGTTTATAT	GGTGATGCTGGACATACAACTATATTATTGGAAGCTAGAGATGTTTTAGGAGGAAATGTC----------TTCATAATACATTTTTATATTTGATCATAAATTAGTTTATAT	102	10	del	N/A
1504	GCTGATGCTGGACATACACCTATATTATTGGAAGCTAGAGATGTTCTGGGAGGAAAGGTCTATATGTTAATTCATAATATATTTTTATATTCGATCATAAATTAGTTTATAT	GCTGATGCTGGACATACACCTCTATTATTGGAAGCTAGAGATGTTCTGGGAGGAAAGGTCTATATGTTAATTCATAATATATTGTTATATTCGATCATAAATTAGTTTATAT	112	10	Sub	N/A
1505	GCTGATGCTGGACATACACCTATATTATTGGAAGCTAGAGATGTTCTGGGAGGAAAGGTCTATATGTTAATTCATAATATATTTTTATATTCGATCATAAATTAGTTTATAT	GCTGAAGCTGGACATACACCTATATCATTGGAAGCTAGAGATGTTCTGGGAGGAAAGGTCTATATGTTAATTCATAATATATTTTTATATTCGATCATAAATTAGTTTATAT	112	10	Sub	N/A
1506	GCTGATGCTGGACATACACCTATATTATTGGAAGCTAGAGATGTTCTGGGAGGAAAGGTCTATATGTTAATTCATAATATATTTTTATATTCGATCATAAATTAGTTTATAT	GCTGACGCTGGACATACACCTATATGATTGGAAGCTAGAGATGTTCTGGGAGGAAAGGGCTATATGTTAATTCATAATATATTTTTATATTCGATCATAAATTAGTTTATAT	112	10	Sub	N/A
1507	GCTGATGCTGGACATACACCTATATTATTGGAAGCTAGAGATGTTCTGGGAGGAAAGGTCTATATGTTAATTCATAATATATTTTTATATTCGATCATAAATTAGTTTATAT	GCTGATGCTGGACATACACCTATATTATTGGAAGCGAGAGATGTTTTAGGAGGAAAGGTCTATATGTTAATTCATAATATATTTTTATATTCGATCATAAATTAGTTTATAT	112	9	Sub	N/A
1508	GCTGATGCTGGACATACACCTATATTATTGGAAGCTAGAGATGTTCTGGGAGGAAAGGTCTATATGTTAATTCATAATATATTTTTATA-TTCGATCATAAATTAGTTTATAT	GCTGATGCTGGACATACACCTATATCATTGGAAGCTAGAGATGTTTTAGGAGGAAAGGTC----------TTCATAATATATTTTTATATTTTGATCATAAATTAGTTTATAT	103	9	del	N/A
1509	GCTGATGCTGGACATACACCTATATTATTGGAAGCTAGAGATGTTCTGGGAGGAAAGGTCTATATGTTAATTCATAATATATTTTTATATTCGATCATAAATTAGTTTATAT	GCTGATGCTGGACATACACCTATATTATTGGAAGCTAGAGATGTTTTAGGAGGAAATGTC----------TTCATAATATATTTTTATATTTGGTCATAAATTAGTTTATAT	102	9	del	N/A
1510	GCTGATGCTGGACATACACCTATATTATTGGAAGCTAGAGATGTTCTGGGAGGAAAGGTCTATATGTTAATTCATAATATATTTTTATA-TTCGATCATAAATTAGTTTATAT	GCTGATGCTGGACATACACCTATATTGTTGGAAGCTAGAGATGTTTTAGGAGGAAAGGTC----------TTCATAATATATTTTTATATTTTGATCATAAATTAGTTTATAT	103	9	del	N/A
1511	GCTGATGCTGGACATACACCTATATTATTGGAAGCTAGAGATGTTCTGGGAGGAAAGGTCTATATGTTAATTCATAATATATTTTTATATTCGATCATAAATTAGTTTATAT	GCTGATGCTGGACATACACCTATATTATTAGAAGCTAGAGATGTTCTATGAGGAAAGGTCTATATGTTAATTCATAATATATTTTTATATTCGATCATAAATTAGTTTATAT	112	9	Sub	N/A
1512	GCTGATGCTGGACATACACCTATATTATTGGAAGCTAGAGATGTTCTGGGAGGAAAGGTCTATATGTTAATTCATAATATATTTTTATATTCGATCATAAATTAGTTTATAT	GCTGATGCTGGACATACACCTATATTATTGGCAGCTAGAGATGTTCTGGGAGGAAAGGTCTATATGTTAATTCATAATATATGTTTATATTCGATCATAAATTAGTTTATAT	112	9	Sub	N/A
1513	GCTGATGCTGGACATACACCTATATTATTGGAAGCTAGAGATGTTCTGGGAGGAAAGGTCTATA---TGTTAATTCATAATATATTTTT--------ATATTCGATCATAAATTAGTTTATAT	GCTGATGCTGGACATACACCTATATTATTGGAAGCTGGAGATGTTCTGGGGGGAAAGGTCTATATACTGTT-ATTCATAATA---TTTTCGAACACAATATTTGATCATAAATTAGTTTATAT	119	9	Ins	N/A
1514	GCTGATGCTGGACATACACCTATATTATTGGAAGCTAGAGATGTTCTGGGAGGAAAGGTCTATATGTTAATTCATAATATATTTTTATATTCGATCATAAATTAGTTTATAT	GCTGATGCAGGACATACACCTATATTATTGGAAGCTAGAGATGTTTTAGGAGGAAAGGTC----------TTCATAATATATTTTTATATTTGATCATAAATTAGTTTATAT	102	9	del	N/A
1515	GCTGATGCTGGACATACACCTATATTATTGGAAGCTAGAGATGTTCTGGGAGGAAAGGTCTATATGTTAATTCATAATATATTTTTATATTCGATCATAAATTAGTTTATAT	GCTGATGCTGGACATACACCTATATTATTGGAAGCTAGAGATGTTCTGGGACGAAAGGTCTATATGTTAATTCATAATATATTTTTATATTCGATCATAAATTAGTTTATAT	112	9	Sub	N/A
1516	GCTGATGCTGGACATACACCTATATTATTGGAAGCTAGAGATGTTCTGGGAGGAAAGGTCTATATGTTAATTCATAATATATTTTTATA-TTCGATCATAAATTAGTTTATAT	GCTGATGCTGGACATACACCTATATTATTGGAAGCTAGAGATGTTTTAGGAGGAAAGGTC----------TTCATAATATATTTTTATATTTTGACCATAAATTAGTTTATAT	103	9	del	N/A
1517	GCTGATGCTGGACATACACCTATATTATTGGAAGCTAGAGATGTTCTGGGAGGAAAGGTCTATATGTTAATTCATAATATATTTTTATATTCGATCATAAATTAGTTTATAT	GCTGATGCTGGACATACACCTATATTATTGGAAGCTAGAGCTGTTTTAGGAGGAAAGGTCTATATGTTAATTCATAATATATTTTTATATTCGATCATAAATTAGTTTATAT	112	9	Sub	N/A
1518	GCTGATGCTGGACATACACCTATATTATTGGAAGCTAGAGATGTTCTGGGAGGAAAGGTCTATATGTTAATTCATAATATATTTTTATATTCGATCATAAATTAGTTTATAT	GCTGATGCTGGACATACACCTATATTATTGGAAGCTAGAGATGTTCTGGCAGGAAAGGTCTATATGTTAATTCATAATATATTTTTATATTCGATCATAAATTAGTTTATAT	112	9	Sub	N/A
1519	GCTGATGCTGGACATACACCTATATTATTGGAAGCTAGAGATGTTCTGGGAGGAAAGGTCTATA---TGTTAATTCATAATATATTTTT--------ATATTCGATCATAAATTAGTTTATAT	GCTGATGCTGGACATACACCTATATTATTGGAAGCTAGAGATGTTCTGGGGGGAAAGGTCCATATACTGTT-ATTCATAATA---TTTTCGAACACAATATTTGATCATAAATTAGTTTATAT	119	9	Ins	N/A
1520	GCTGATGCTGGACATACACCTATATTATTGGAAGCTAGAGATGTTCTGGGAGGAAAGGTCTATATGTTAATTCATAATATATTTTTATATTCGATCATAAATTAGTTTATAT	GCTGATGCTGGACATACACCTATATTATTGGAAGCTAGAGATGTTTTAGGAGGAAAGGTC----------TTCATAATATATTGTTGTATTTGATCATAAATTAGTTTATAT	102	9	del	N/A
1521	GCTGATGCTGGACATACACCTATATTATTGGAAGCTAGAGATGTTCTGGGAGGAAAGGTCTATATGTTAATTCATAATATATTTTTATATTCGATCATAAATTAGTTTATAT	GCTGATGCTGGACATACACCTATATTATTAGAAGCTAGAGATGTTCTGGGAGGAAAGGTCTATATGTTAATTCACAATATATTTTTATATTCGATCATAAATTAGTTTATAT	112	9	Sub	N/A
1522	GCTGATGCTGGACATACACCTATATTATTGGAAGCTAGAGATGTTCTGGGAGGAAAGGTCTATATGTTAATTCATAATATATTTTTATATTCGATCATAAATTAGTTTATAT	GCTGATGCTGGACATACACCTATATTATTGGAATCTAGAGATGTTTTAGGAGGAAAGGTC----------TTCATAATATATTTTTGTATTTGATCATAAATTAGTTTATAT	102	9	del	N/A
1523	GCTGATGCTGGACATACACCTATATTATTGGAAGCTAGAGATGTTCTGGGAGGAAAGGTCTATATGTTAATTCATAATATATTTTTATATTCGATCATAAATTAGTTTATAT	GCTGATGCTGGACTTACACCTATATTATTGGAAGCTAGAGATGTTCTGGGAGGAAAGGTC----------TTCATAATATATTTTTATATTTGATCATAAATTAGTTTATAT	102	9	del	N/A
1524	GCTGATGCTGGACATACACCTATATTATTGGAAGCTAGAGATGTTCTGGGAGGAAAGGTCTATATGTTAATTCATAATATATTTTTATATTCGATCATAAATTAGTTTATAT	GCTGATGCTGGACATACACCTATATTATTGGAAGCTAGAGATGTTTTAGGAGGAAATGTC----------TTCATAATATATTTTTATATTTGATCATATATTAGTTTATAT	102	9	del	N/A
1525	GCTGATGCTGGACATACACCTATATTATTGGAAGCTAGAGATGTTCTGGGAGGAAAGGTCTATA---TGTTAATTCATAATATATTTTT--------ATATTCGATCATAAATTAGTTTATAT	GCTGATGCTGGACATACACCTATATTATTGGAAGCTAGAGATGTTCTGGGGGGAAAGGTCTATATACTGTT-ATTCATAATA---TTTTCGAACACAATATTTGATCATAAATTAGTTTATAC	119	9	Ins	N/A
1526	GCTGATGCTGGACATACACCTATATTATTGGAAGCTAGAGATGTTCTGGGAGGAAAGGTCTATATGTTAATTCATAATATATTTTTATA-TTCGATCATAAATTAGTTTATAT	GCTGATGCTGGACATACACCTATACTATTGGAAGCTAGAGATGTTCTGGGAGGAAAGGTC----------TTCATAATATATTTTTATATTTTGATCATAAATTAGTTTATAT	103	9	del	N/A
1527	GCTGATGCTGGACATACACCTATATTATTGGAAGCTAGAGATGTTCTGGGAGGAAAGGTCTATATGTTAATTCATAATATATTTTTATATTCGATCATAAATTAGTTTATAT	GCTGATGCTGGACATACACCTATATTATTGGAAGCTAGATATGTTTTAGGAGGAAATGTC----------TTCATAATATATTTTTATATTTGATCATAAATTAGTTTATAT	102	9	del	N/A
1528	GCTGATGCTGGACATACACCTATATTATTGGAAGCTAGAGATGTTCTGGGAGGAAAGGTCTATA---TGTTAATTCATAATATATTTTTATATTCGATCATAAATTAGTTTATAT	GCTGATGCTGGACATACACCTATATTATTGGAAGCTAGAGATGTTCTGGGGGGAAAGGTCTATACACTGTT-ATTCATAATATATTTTTATATTCGATCATAAATTAGTTTATAT	114	9	Ins	N/A
1529	GCTGATGCTGGACATACACCTATATTATTGGAAGCTAGAGATGTTCTGGGAGGAAAGGTCTATATGTTAATTCATAATATATTTTTATATTCGATCATAAATTAGTTTATAT	GCTGATGCTGGACATACACCTATATTATTGGAAGCTAGAGATGTTCAGGGGGGAAAGGTCTATATGTTAATTCGTAATATATTTTTATATTCGATCATAAATTAGTTTATAT	112	9	Sub	N/A
1530	GCTGATGCTGGACATACACCTATATTATTGGAAGCTAGAGATGTTCTGGGAGGAAAGGTCTATATGTTAATTCATAATATATTTTTATATTCGATCATAAATTAGTTTATAT	GCTGATGCTGGACATACACCTATATTATTGGAATCTAGAGATTTTCTGGGAGGAAAGGTCTATATGTTAATTCATAATATATTTTTATATTCGATCATAAATTAGTTTATAT	112	9	Sub	N/A
1531	GCTGATGCTGGACATACACC--------------------TATATTATTGGAAGCTAGAGATGTTCTGGGAGGAAAGGTCTATATGTTAATTCATAA-TATATTTTTATATTCGATCATAAATTAGTTTATAT	GCTGATGCTGGACATACACCGCTGATGCTGGACGTGCATTTATATTATTGGAAGCTAGAGATGTTTTAGGAGGAAAGGTC----------TTCATAATTTTTTTTTTATATTTGATCATAAATTAGTTTATAT	123	9	Ins	N/A
1532	GCTGATGCTGGACATACACCTATATTATTGGAAGCTAGAGATGTTCTGGGAGGAAAGGTCTATATGTTAATTCATAATATATTTTTATATTCGATCATAAATTAGTTTATAT	GCTGATGCTGGACATACACCTATACTATTGGAAGCTAGAGATGTTTTAGGAGGAAAGGTC----------TTCATAATATGTTTTTATATTTTATCATAAATTAGTTTATAT	102	9	del	N/A
1533	GCTGATGCTGGACATACACCTATATTATTGGAAGCTAGAGATGTTCTGGGAGGAAAGGTCTATATGTTAATTCATAATATATTTTTATATTCGATCATAAATTAGTTTATAT	GCTGATGCTGGACATACACCTATATTATTGGAAGCTAGAGATGTTTTAGGAGGAAAGGTC----------TTCATAATATATTTTTATCTTTGATCATAAATTAGTTTATAT	102	9	del	N/A
1534	GCTGATGCTGGACATACACCTATATTATTGGAAGCTAGAGATGTTCTGGGAGGAAAGGTCTATATGTTAATTCATAATATATTTTTATA-TTCGATCATAAATTAGTTTATAT	GCTGATGCTGGACATACACCTATATTATTGGGAGCTAGAGATGTTTTAGGAGGAAAGGTC----------TTCATAATATATTTTTATATTTTGATCATAAATTAGTTTATAT	103	9	del	N/A
1535	GCTGATGCTGGACATACACCTATATTATTGGAAGCTAGAGATGTTCTGGGAGGAAAGGTCTATATGTTAATTCATAATATATTTTTATATTCGATCATAAATTAGTTTATAT	GCTGATGCTGGACATACACCTATATTATTGGCAGCTAGAGATGTTCTGGGAGGAAAGGTC----------TTCATAATATATTTTTATATTTGATCATAAATTAGTTTATAT	102	9	del	N/A
1536	GCTGATGCTGGACATACACCTATATTATTGGAAGCTAGAGATGTTCTGGGAGGAAAGGTCTATA---TGTTAATTCATAATATATTTTT--------ATATTCGATCATAAATTAGTTTATAT	GCTGATGCTGGACATACACCTATATTATTGGAAGCTAGAGATGTTCTGGGGGGAAAGGTCTATATACTGTT-ATTCATAATA---TTTTCGAACACGATATTTGATCATAAATTAGTTTATAT	119	9	Ins	N/A
1537	GCTGATGCTGGACATACACCTATATTATTGGAAGCTAGAGATGTTCTGGGAGGAAAGGTCTATATGTTAATTCATAATATATTTTTATATTCGATCATAAATTAGTTTATAT	GCTGATGCTGGACATACACCTATATTATTGGAAGCTGGAGATGTTCTGGGAGGAAAGGTCTATACGTTAATTCATAATATATTTTTATATTCGATCATAAATTAGTTTATAT	112	9	Sub	N/A
1538	GCTGATGCTGGACATACACCTATATTATTGGAAGCTAGAGATGTTCTGGGAGGAAAGGTCTATATGTTAATTCATAATATATTTTTATATTCGATCATAAATTAGTTTATAT	GCTGATGCTGGACATACACCTATATTATTGGAAGCTAGAGATGTTCTGGGAGGAAAGGTCTATATGTTAATTCATAATATATTTTTATATTCGATAATTAATTAGTTTATAT	112	9	Sub	N/A
1539	GCTGATGCTGGACATACACCTATATTATTGGAAGCTAGAGATGTTCTGGGAGGAAAGGTCTATATGTTAATTCATAATATATTTTTATA-TTCGATCATAAATTAGTTTATAT	GCTGATGCTGGACATATACCTATATTATTGGAAGCTAGAGATGTTTTAGGAGGAAAGGTC----------TTCATAATATATTTTTATATTTTGATCATAAATTAGTTTATAT	103	9	del	N/A
1540	GCTGATGCTGGACATACACCTATATTATTGGAAGCTAGAGATGTTCTGGGAGGAAAGGTCTATATGTTAATTCATAATATATTTTTATA-TTCGATCATAAATTAGTTTATAT	GCTGATGCTGGACATACACCTATATTATTGGAAGCTAGAGATGTTTTAGGAGGAAAGGTC----------TTCATAATATATTTTTATATTTTGATCATCAATTAGTTTATAT	103	9	del	N/A
1541	GCTGATGCTGGACATACACCTATATTATTGGAAGCTAGAGATGTTCTGGGAGGAAAGGTCTATATGTTAATTCATAATATATTTTTATATTCGATCATAAATTAGTTTATAT	GCTGATGCTGGACATACACCTATATTATTGGAAGCTAGAGATGTTTTAGGAGGAAATGTC----------TTCATAATACATTTTTTTATTTGATCATAAATTAGTTTATAT	102	9	del	N/A
1542	GCTGATGCTGGACATACACCTATATTATTGGAAGCTAGAGATGTTCTGGGAGGAAAGGTCTATA---TGTTAATTCATAATATATTTTT--------ATATTCGATCATAAATTAGTTTATAT	GCTGATGCTGGACATACACCTATATTATTGGAAGCTAGAGATGTTTTAGGAGGAAAGGTCTATACACTGTT-ATTCATAATA---TTTTCGAACACAATATTTGATCATAAGTTAGTTTATAT	119	9	Ins	N/A
1543	GCTGATGCTGGACATACACCTATATTATTGGAAGCTAGAGATGTTCTGGGAGGAAAGGTCTATA---TGTTAATTCATAATATATTT------TTATATTCGATCATAAATTAGTTTATAT	GCTGATGCTGGACATACACCTATATTATTGGAAGCTAGAGATGTTCTGGGGGGAAAGGTCTATATACTGTT-ATTCATAATAT-TTTCGAACATAATATTTGATCATAAATTAGTTTATAT	119	9	Ins	N/A
1544	GCTGATGCTGGACATACACCTATATTATTGGAAGCTAGAGATGTTCTGGGAGGAAAGGTCTATATGTTAATTCATAATATATTTTTATATTCGATCATAAATTAGTTTATAT	GCTGATGCTGGACATACACCTATATTATTGGAAGCTAGAGATGTTTTAGGAGGAAATGTC----------TTCATAATATATTTTTATATTTGATCATACATTAGTTTATAT	102	9	del	N/A
1545	GCTGATGCTGGACATACACCTATATTATTGGAAGCTAGAGATGTTCTGGGAGGAAAGGTCTATA---TGTTAATTCATAATATATTTTT--------ATATTCGATCATAAATTAGTTTATAT	GCTGATGCTGAACATACACCTATATTATTGGAAGCTAGAGATGTTCTGGGGGGAAAGGTCTATATACTGTT-ATTCATAATA---TTTTCGAACACAATATTTGATCATAAATTAGTTTATAT	119	9	Ins	N/A
1546	GCTGATGCTGGACATACACCTATATTATTGGAAGCTAGAGATGTTCTGGGAGGAAAGGTCTATATGTTAATTCATAATATATTTTTATATTCGATCATAAATTAGTTTATAT	GCTGATGCAGGACATACACCTATATTATTGGAAGCTAGAGATGTTTTAGGAGGAAATGTC----------TTCATAATACATTTTTATATTTGATCATAAATTAGTTTATAT	102	9	del	N/A
1547	GCTGATGCTGGACATACACCTATATTATTGGAAGCTAGAGATGTTCTGGGAGGAAAGGTCTATA---TGTTAATTCATAATATATTTTT--------ATATTCGATCATAAATTAGTTTATAT	GCTGATGCTGGACATACACCTATATTATTGGAAGCTAGAGATGTTCTGGGGGGAAAGGTCTATATACTGTT-ATTCATAATA---TTTTCGAACACAATATTTGATAATAAATTAGTTTATAT	119	9	Ins	N/A
1548	GCTGATGCTGGACATACACCTATATTATTGGAAGCTAGAGATGTTCTGGGAGGAAAGGTCTATATGTTAATTCATAATATATTTTTATATTCGATCATAAATTAGTTTATAT	GCTGATGCTGGACATACACCTATATTATTGGAAGCTAGAGATGTTCTGGGAGGAAAGGTCTATATGTTAATTCATCATATATTTTTATATTCGATCATAAATTAGTTTATAT	112	9	Sub	N/A
1549	GCTGATGCTGGACATACACCTATATTATTGGAAGCTAGAGATGTTCTGGGAGGAAAGGTCTATATGTTAATTCATAATATATTTTTATATTCGATCATAAATTAGTTTATAT	GCTGATGCTGGACATACACCTATATTATTGGAAGCTAGAGATGTTCTGGGAGGAAATGTC----------TTCATAATACATTTTTATATTCGATCATAAATTAGTTTATAT	102	9	del	N/A
1550	GCTGATGCTGGACATACACCTATATTATTGGAAGCTAGAGATGTTCTGGGAGGAAAGGTCTATATGTTAATTCATAATATATTTTTATATTCGATCATAAATTAGTTTATAT	GCTTATGCTGGACATACACCTATATGATTGGAAGCTAGAGATGTTCTGGGAGGAAAGGTCTATATGTTAATTCATAATATATTTTTATATTCGATCATAAATTAGTTTATAT	112	9	Sub	N/A
1551	GCTGATGCTGGACATACACCTATATTATTGGAAGCTAGAGATGTTCTGGGAGGAAAGGTCTATATGTTAATTCATAATATATTTTTATATTCGATCATAAATTAGTTTATAT	GCTGATGCTGTACATACACCTATATTATTGGAAGCTAGAGATGTTCGGGGAGGAAAGGTCTATATGTTAATTCATAATATATTTTTATATTCGATCATAAATTAGTTTATAT	112	9	Sub	N/A
1552	GCTGATGCTGGACATACACCTATATTATTGGAAGCTAGAGATGTTCTGGGAGGAAAGGTCTATATGTTAATTCATAATATATTTTTATATTCGATCATAAATTAGTTTATAT	GCTGATGCTGGACATACACCTATATTATTGGAAGCGAGAGATGGTTTAGGAGGAAAGGTC----------TTCATAATATATTTTTATATTTGATCATAAATTAGTTTATAT	102	9	del	N/A
1553	GCTGATGCTGGACATACACCTATATTATTGGAAGCTAGAGATGTTCTGGGAGGAAAGGTCTATATGTTAATTCATAATATATTTTTATATTCGATCATAAATTAGTTTATAT	GCTGATGCTGGACATACACCTATATTATTGGAAGCTAGAGATGTTTTAGGAGGAAACGTC----------TTCATAATATATTTTTATATTTGATCATAAATTAGTTTATAT	102	9	del	N/A
1554	GCTGATGCTGGACATACACCTATATTATTGGAAGCTAGAGATGTTCTGGGAGGAAAGGTCTATATGTTAATTCATAATATATTTTTATATTCGATCATAAATTAGTTTATAT	GCTGATGCTGGACATACACCTATACTATTGGAAGCTAGAGATGTTCTGGGGGGAAAGGTCTATATGTTAATTCATAATATATTTTTATATTCGATCATAAATTAGTTTATAT	112	9	Sub	N/A
1555	GCTGATGCTGGACATACACCTATATTATTGGAAGCTAGAGATGTTCTGGGAGGAAAGGTCTATATGTTAATTCATAATATATTTTTATATTCGATCATAAATTAGTTTATAT	GCTGATGCTGGACATACACCTATATTATTGGAAGCTAGAGATGTTTTAGGAGGAAATGTC----------TTCATAATACATTTTGATATTTGATCATAAATTAGTTTATAT	102	9	del	N/A
1556	GCTGATGCTGGACATACACCTATATTATTGGAAGCTAGAGATGTTCTGGGAGGAAAGGTCTATA---TGTTAATTCATAATATATTTTT--------ATATTCGATCATAAATTAGTTTATAT	GCTGATGCTGGACATATACCTATATTATTGGAAGCTAGAGATGTTCTGGGGGGAAAGGTCTATACACTGTT-ATTCATAATA---TTTTCGAACACAATATTTGATCATAAGTTAGTTTATAT	119	9	Ins	N/A
1557	GCTGATGCTGGACATACACCTATATTATTGGAAGCTAGAGATGTTCTGGGAGGAAAGGTCTATATGTTAATTCATAATATATTTTTATA-TTCGATCATAAATTAGTTTATAT	GCTGATGCTGGACATCCACCTATATTATTGGAAGCTAGAGATGTTTTAGGAGGAAAGGTC----------TTCATAATATATTTTTATATTTTGATCATAAATTAGTTTATAT	103	9	del	N/A
1558	GCTGATGCTGGACATACACCTATATTATTGGAAGCTAGAGATGTTCTGGGAGGAAAGGTCTATATGTTAATTCATAATATATTTTTATA-TTCGATCATAAATTAGTTTATAT	GCTGATGCTGGACATACACCTATATTATTGGAAGCTAGAGATGTTTTGGGAGGAAAGGTC----------TTCATAATATATTTTTATATTTTGATCATAAATTAGTTTATAT	103	9	del	N/A
1559	GCTGATGCTGGACATACACCTATATTATTGGAAGCTAGAGATGTTCTGGGAGGAAAGGTCTATATGTTAATTCATAATATATTTTTATATTCGATCATAAATTAGTTTATAT	GCTGATGCTGGACATACACCTCTATTATTGGAAGCTAGAGCTGTTCTGGGAGGAAAGGTCTATATGTTAATTCATAATATATTTTTATATTCGATCATAAATTAGTTTATAT	112	9	Sub	N/A
1560	GCTGATGCTGGACATACACCTATATTATTGGAAGCTAGAGATGTTCTGGGAGGAAAGGTCTATATGTTAATTCATAATATATTTTTATA-TTCGATCATAAATTAGTTTATAT	GCTGATGCTGGACATACACCTATATTATTGGAAACTAGAGATGTTTTAGGAGGAAAGGTC----------TTCATAATATATTTTTATATTTTGATCATAAATTAGTTTATAT	103	9	del	N/A
1561	GCTGATGCTGGACATACACCTATATTATTGGAAGCTAGAGATGTTCTGGGAGGAAAGGTCTATATGTTAATTCATAATATATTTTTATATTCGATCATAAATTAGTTTATAT	GCTGATGCTGGACATACACCTATATTATTAGAAGCTAAAGATGTTTTAGGAGGAAATGTC----------TTCATAATACATTTTTATATTTGATCATAAATTAGTTTATAT	102	9	del	N/A
1562	GCTGATGCTGGACATACACCTATATTATTGGAAGCTAGAGATGTTCTGGGAGGAAAGGTCTATA---TGTTAATTCATAATATATTTTT--------ATATTCGATCATAAATTAGTTTATAT	GCTGATGCTGGACATACACCTATATTATTGGAAGCTAGAGATGTTCTGGGGGGAAAGGTCTATATACTGTT-ATTCATAATA---TTTTCGAACACAATACTTGATCATAAATTAGTTTATAT	119	9	Ins	N/A
1563	GCTGATGCTGGACATACACCTATATTATTGGAAGCTAGAGATGTTCTGGGAGGAAAGGTCTATATGTTAATTCATAATATATTTTTATATTCGATCATAAATTAGTTTATAT	GCTGATGCTGGACATACACCTATATTATTGGAAGCTAGAGATGTTCTGGGAGGTAAGGTCTATATGTTAATTCATAATATATTTTTATATTCGATCATAAATTAGTTTATAT	112	9	Sub	N/A
1564	GCTGATGCTGGACATACACCTATATTATTGGAAGCTAGAGATGTTCTGGGAGGAAAGGTCTATATGTTAATTCATAATATATTTTTATATTCGATCATAAATTAGTTTATAT	GCTGCTGCTGGACATACACCTATATTATTGGCAGCTAGAGATGTTTTAGGAGGAAAGGTC----------TTCATAATATATTTTTATATTTGATCATAAATTAGTTTATAT	102	9	del	N/A
1565	GCTGATGCTGGACATACACCTATATTATTGGAAGCTAGAGATGTTCTGGGAGGAAAGGTCTATATGTTAATTCATAATATATTTTTATATTCGATCATAAATTAGTTTATAT	GCTGATGCTGGACATACACCTATATTATTGGAAGCTAGAGATGTTTTAAGAGGAAAGGTC----------TTCATAATATGTTTTTATATTTGATCATAAATTAGTTTATAT	102	9	del	N/A
1566	GCTGATGCTGGACATACACCTATATTATTGGAAGCTAGAGATGTTCTGGGAGGAAAGGTCTATATGTTAATTCATAATATATTTTTATATTCGATCATAAATTAGTTTATAT	GCTGATGCTGGACATACACCTATATTATTGGAAGCTAGAGATGTTTTAGGAGGAAATGTC----------TTCATAATACATTTTTATATTTGATCATAAATTAGTTTCTAT	102	9	del	N/A
1567	#NAME?	GCTGATGCTGGACATACACCGCTGATGCTGGACATACACCTATATTATTGGAAGCTAGAGATGTTCTGGGAGGAAATGTC----------TTCATAATACATTTTTATATTTGATCATAAATTAGTTTATAT	122	9	Ins	N/A
1568	GCTGATGCTGGACATACACCTATATTATTGGAAGCTAGAGATGTTCTGGGAGGAAAGGTCTATATGTTAATTCATAATATATTTTTATATTCGATCATAAATTAGTTTATAT	GCTGATGCTGGACATACACCTATACTATTGGAAGCTAGAGATGTTTTAGGAGGAAAGGTC----------TTAATAATATGTTTTTATATTTGATCATAAATTAGTTTATAT	102	9	del	N/A
1569	GCTGATGCTGGACATACACCTATATTATTGGAAGCTAGAGATGTTCTGGGAGGAAAGGTCTATATGTTAATTCATAATATATTTTTATATTCGATCATAAATTAGTTTATAT	GCTGATGCTGGACATACACCTATCTTATTGGCAGCTAGAGATGTTTTAGGAGGAAATGTC----------TTCATAATACATTTTTATATTTGATCATAAATTAGTTTATAT	102	9	del	N/A
1570	GCTGATGCTGGACATACACCTATATTATTGGAAGCTAGAGATGTTCTGGGAGGAAAGGTCTATATGTTAATTCATAATATATTTTTATATTCGATCATAAATTAGTTTATAT	GCTGATGCTGGACATACACCTATATTATTGGAAGCTAGAGATGTTCTGGGAGGAAAGGTCTATATGTTAATTCAAAATATATTTTTATATTCGATCATAAATTAGTTTATAT	112	9	Sub	N/A
1571	GCTGATGCTGGACATACACCTATATTATTGGAAGCTAGAGATGTTCTGGGAGGAAAGGTCTATATGTTAATTCATAATATATTTTTATATTCGATCATAAATTAGTTTATAT	GCTGATGCTGTACATACACCTATATTATTGGAAGCGAGAGATGTTTTAGGAGGAAATGTC----------TTCATAATACATTTTTATATTTGATCATAAATTAGTTTATAT	102	9	del	N/A
1572	GCTGATGCTGGACATACACCTATATTATTGGAAGCTAGAGATGTTCTGGGAGGAAAGGTCTATATGTTAATTCATAATATATTTTTATATTCGATCATAAATTAGTTTATAT	GCTGATGCTGGACATACACCTATATTAATGGACGCTAGAGATGTTTTAGGAGGAAAGGTC----------TTCATAATATATTTTTATATTTGATCATAAATTAGTTTATAT	102	9	del	N/A
1573	GCTGATGCTGGACATACACCTATATTATTGGAAGCTAGAGATGTTCTGGGAGGAAAGGTCTATA---TGTTAATTCATAATATATTTTT--------ATATTCGATCATAAATTAGTTTATAT	GCTGATGCTGGACATACACCTATATGATTGGAAGCTAGAGAGGTTCTGGGGGGAAAGGTCTATATACTGTT-ATTCATAATA---TTTTCGAACACAATATTTGATCATAAATTAGTTTATAT	119	9	Ins	N/A
1574	GCTGATGCTGGACATACACCTATATTATTGGAAGCTAGAGATGTTCTGGGAGGAAAGGTCTATATGTTAATTCATAATATATTTTTATATTCGATCATAAATTAGTTTATAT	GCTGATGCTGGACATACACCTATATTATTGGAAGCTAGAGATGTTCTGGGAGGAAAGGTCTATATGTTACTTCATAATATATTTTTATATTCGATCATAAATTAGTTTATAT	112	9	Sub	N/A
1575	GCTGATGCTGGACATACACCTATATTATTGGAAGCTAGAGATGTTCTGGGAGGAAAGGTCTATATGTTAATTCATAATATATTTTTATATTCGATCATAAATTAGTTTATAT	GCTGATGCTGGACATACACCTATATTAGTGGAAGCTAGAGATGTTCTGGGAGGAAAGGTC----------TTCATAATATATTTTTATATTTGATCATAAATTAGTTTATAT	102	9	del	N/A
1576	GCTGATGCTGGACATACACCTATATTATTGGAAGCTAGAGATGTTCTGGGAGGAAAGGTCTATATGTTAATTCATAATATATTTTTATATTCGATCATAAATTAGTTTATAT	GCTGATGCTGGACCTACACCTATATTATTGGAAGCTAGAGATGTTTTAGGAGGAAAGGTC----------TTCATAATATATGTTTATATTTGATCATAAATTAGTTTATAT	102	9	del	N/A
1577	GCTGATGCTGGACATACACCTATATTATTGGAAGCTAGAGATGTTCTGGGAGGAAAGGTCTATATGTTAATTCATAATATATTTTTATATTCGATCATAAATTAGTTTATAT	GCTGATGCTGGACATACACCTATATTATTGGCCGCTAGCGATGTTCTGGGAGGAAAGGTCTATATGTTAATTCATAATATATTTTTATATTCGATCATAAATTAGTTTATAT	112	9	Sub	N/A
1578	GCTGATGCTGGACATACACCTATATTATTGGAAGCTAGAGATGTTCTGGGAGGAAAGGTCTATATGTTAATTCATAATATATTTTTATATTCGATCATAAATTAGTTTATAT	GCTGATGCTGGGCATACACCTATATTATTGGAAGCTAGAGATGTTCTGGGAGGAAAGGTCTATATGTTAATTCATAATATATTTTTATATTCGAGCATAAATTAGTTTATAT	112	9	Sub	N/A
1579	GCTGATGCTGGACATACACCTATATTATTGGAAGCTAGAGATGTTCTGGGAGGAAAGGTCTATATGTTAATTCATAATATATTTTTATATTCGATCATAAATTAGTTTATAT	GCTGATGCTGGGCATACACCTATATTATTGGAAGCTAGAGATGTTTTAGGAGGAAAGGTC----------TTCATAATATGTTTTTATATTTGATCATAAATTAGTTTATAT	102	9	del	N/A
1580	GCTGATGCTGGACATACACCTATATTATTGGAAGCTAGAGATGTTCTGGGAGGAAAGGTCTATATGTTAATTCATAATATATTTTTATATTCGATCATAAATTAGTTTATAT	GCTCATGCTGGACATACACCTATATTATTGGAAGCTAGAGATGTTTTAGGAGGAAAGGTC----------TTCATAATACATTTTTATATTTGATCATAAATTAGTTTATAT	102	9	del	N/A
1581	GCTGATGCTGGACATACACCTATATTATTGGAAGCTAGAGATGTTCTGGGAGGAAAGGTCTATATGTTAATTCATAATATATTTTTATATTCGATCATAAATTAGTTTATAT	GCTGATGCTGGACATACACCTATATTATTGGAAGCTAGAGATGTTCTGGGAGGAAAGGTCTATATGTTAGTTCATAAGATATTTTTATATTCGATCATAAATTAGTTTATAT	112	9	Sub	N/A
1582	GCTGATGCTGGACATACACCTATATTATTGGAAGCTAGAGATGTTCTGGGAGGAAAGGTCTATATGTTAATTCATAATATATTTTTATATTCGATCATAAATTAGTTTATAT	GCTGATGCTGGACATACACCTATATTACTGGATGCTAGAGATGTTTTAGGAGGAAATGTC----------TTCATAATACATTTTTATATTTGATCATAAATTAGTTTATAT	102	9	del	N/A
1583	GCTGATGCTGGACATACACCTATATTATTGGAAGCTAGAGATGTTCTGGGAGGAAAGGTCTATATGTTAATTCATAATATATTTTTATATTCGATCATAAATTAGTTTATAT	GCTGATGCTGGACATACACCTATATTAATGGACGCTAGAGATGTTTTAGGAGGAAATGTC----------TTCATAATACATTTTTATATTTGATCATAAATTAGTTTATAT	102	9	del	N/A
1584	GCTGATGCTGGACATACACCTATATTATTGGAAGCTAGAGATGTTCTGGGAGGAAAGGTCTATATGTTAATTCATAATATATTTTTATATTCGATCATAAATTAGTTTATAT	GCTGATGCTGGACATACACCTATATTAATGGATGCTAGAGATGTTTTAGGAGGAAATGTC----------TTCATAATACATTTTTATATTTGATCATAAATTAGTTTATAT	102	9	del	N/A
1585	GCTGATGCTGGACATACACCTATATTATTGGAAGCTAGAGATGTTCTGGGAGGAAAGGTCTATATGTTAATTCATAATATATTTTTATATTCGATCATAAATTAGTTTATAT	GCTGATGCTGGACATACACCTATATTAATGGATGCTAGAGATGTTTTAGGAGGAAAGGTC----------TTCATAATATATTTTTATATTTGATCATAAATTAGTTTATAT	102	9	del	N/A
1586	GCTGATGCTGGACATACACCTATATTATTGGAAGCTAGAGATGTTCTGGGAGGAAAGGTCTATATGTTAATTCATAATATATTTTTATATTCGATCATAAATTAGTTTATAT	GATGATGCTGGACATACAGCTATATTATTGGAAGCTAGAGATGTTTTAGGAGGAAAGGTC----------TTCATAATATATTTTTATATTTGATCATAAATTAGTTTATAT	102	9	del	N/A
1587	GCTGATGCTGGACATACACCTATATTATTGGAAGCTAGAGATGTTCTGGGAGGAAAGGTCTATA---TGTTAATTCATAATATATTTTT--------ATATTCGATCATAAATTAGTTTATAT	GCTGATGCTGGACATACACCTATATTATTGGAAGCTAGAGATGTTCTGGGGGGAAAGGTCTATATACTGTT-ATTCATAATA---TTTTCGAACACAATATTTGATCATACATTAGTTTATAT	119	8	Ins	N/A
1588	GCTGATGCTGGACATACACCTATATTATTGGAAGCTAGAGATGTTCTGGGAGGAAAGGTCTATATGTTAATTCATAATATATTTTTATATTCGATCATAAATTAGTTTATAT	GCTGATGCTGGACATACACCTATATTATTGGAAGCTAGAGATGTTCTGGGAGGAAAGGTCTATATGTTAATTCATAATATATTTTTATATTCGCTCATAAATTAGTTTATAT	112	8	Sub	N/A
1589	GCTGATGCTGGACATACACCTATATTATTGGAAGCTAGAGATGTTCTGGGAGGAAAGGTCTATATGTTAATTCATAATATATTTTTATA-TTCGATCATAAATTAGTTTATAT	GCTGATGCTGGACATACACCTATATTATTGGAAGCTAGAGATGTTTTAGGAGGAAAGGTC----------TTCATAATATATTTTTATATTTTGATCATTAATTAGTTTATAT	103	8	del	N/A
1590	GCTGATGCTGGACATACACCTATATTATTGGAAGCTAGAGATGTTCTGGGAGGAAAGGTCTATATGTTAATTCATAATATATTTTTATATTCGATCATAAATTAGTTTATAT	GCTGATGCTGGACATACACCTATATTATTGGAAGCTAGAGATGTTCTGGGAGGAAAGGTCTATATGTTAATTCATAATATATTTGTATATTCGATCATTAATTAGTTTATAT	112	8	Sub	N/A
1591	GCTGATGCTGGACATACACCTATATTATTGGAAGCTAGAGATGTTCTGGGAGGAAAGGTCTATATGTTAATTCATAATATATTTTTATATTCGATCATAAATTAGTTTATAT	GCTGATGCTGGACATATACCTATACTATTGGAAGCTAGAGATGTTTTAGGAGGAAAGGTC----------TTCATAATATGTTTTTATATTTGATCATAAATTAGTTTATAT	102	8	del	N/A
1592	GCTGATGCTGGACATACACCTATATTATTGGAAGCTAGAGATGTTCTGGGAGGAAAGGTCTATATGTTAATTCATAATATATTTTTATATTCGATCATAAATTAGTTTATAT	GCTGATGCTGGACATACACCTATATTATTTTAAGCTAGAGATGTTCTGGGAGGAAAGGTCTATATGTTAATTCATAATATATTTTTATATTCGATCATAAATTAGTTTATAT	112	8	Sub	N/A
1593	GCTGATGCTGGACATACACCTATATTATTGGAAGCTAGAGATGTTCTGGGAGGAAAGGTCTATATGTTAATTCATAATATATTTTTATATTCGATCATAAATTAGTTTATAT	GCTGATGCTGGACATACACCTATATTATTGGAAGCTAGAGATGTTCTGGGAGGAAAGGTCTATATGTTAATTCATAATATATTTTTATATTCGATCATAAATTAGTTTATTT	112	8	Sub	N/A
1594	GCTGATGCTGGACATACACCTATATTATTGGAAGCTAGAGATGTTCTGGGAGGAAAGGTCTATATGTTAATTCATAATATATTTTTATATTCGATCATAAATTAGTTTATAT	GCTGATGCTGGACATACACCTATATTATTGGAAGCTAGAGATGTTCTGGAAGGAAAGGTCTATATGTTAATTCATAATATATTTTTATGTTCGATCATAAATTAGTTTATAT	112	8	Sub	N/A
1595	GCTGATGCTGGACATACACCTATATTATTGGAAGCTAGAGATGTTCTGGGAGGAAAGGTCTATATGTTAATTCATAATATATTTTTATATTCGATCATAAATTAGTTTATAT	GCTGATGCTGGACATACACCTATATTATTGGAAGCTAGAGATGTTCTAGAAGGAAAGGTCTATATGTTAATTCATAATATATTTTTATATTCGATCATAAATTAGTTTATAT	112	8	Sub	N/A
1596	GCTGATGCTGGACATACACCTATATTATTGGAAGCTAGAGATGTTCTGGGAGGAAAGGTCTATATGTTAATTCATAATATATTTTTATATTCGATCATAAATTAGTTTATAT	GCTGATGCTGGATATACACCTATATTATTGGAAGCTAGAGATGTTTTAGGAGGAAAGGTCTATATGTTAATTCATAATATATTTTTATATTCGATCATAAATTAGTTTATAT	112	8	Sub	N/A
1597	GCTGATGCTGGACATACACCTATATTATTGGAAGCTAGAGATGTTCTGGGAGGAAAGGTCTATATGTTAATTCATAATATATTTTTATATTCGATCATAAATTAGTTTATAT	GCTGATGCTGGACATACACCTATATTATTGGAAGCTAGAGATGTTTTAGGAGGAAATGTC-----------TCATAATACATTTTTATATTTGATCATAAATTAGTTTATAT	101	8	del	N/A
1598	GCTGATGCTGGACATACACCTATATTATTGGAAGCTAGAGATGTTCTGGGAGGAAAGGTCTATATGTTAATTCATAATATATTTTTATATTCGATCATAAATTAGTTTATAT	GCTGATGCTGGACATACACCTATATTATTGGAAGCTAGAGATGTTTTAGTAGGAAATGTC----------TTCATAATATATTTTTATATTTGATCATAAATTAGTTTATAT	102	8	del	N/A
1599	GCTGATGCTGGACATACACCTATATTATTGGAAGCTAGAGATGTTCTGGGAGGAAAGGTCTATATGTTAATTCATAATATATTTTTATATTCGATCATAAATTAGTTTATAT	GCTGATGCTGGACATACACCTATATTATTGGAAGCTCGAGATGTTCTGGGAGGAAAGGTCTATATGTTAATTCATAATATATTGTTATATTCGATCATAAATTAGTTTATAT	112	8	Sub	N/A
1600	GCTGATGCTGGACATACACCTATATTATTGGAAGCTAGAGATGTTCTGGGAGGAAAGGTCTATATGTTAATTCATAATATATTTTTATATTCGATCATAAATTAGTTTATAT	GCTGATGCTGGACAAACACCTATATTATTGGAAGCTAGAGATGTTCTGGGAGGAAAGGTCTATATGTTAATTCATAATATATTTTTATATTCGATCATAAATTAGTTTATAT	112	8	Sub	N/A
1601	GCTGATGCTGGACATACACCTATATTATTGGAAGCTAGAGATGTTCTGGGAGGAAAGGTCTATATGTTAATTCATAATATATTTTTATA-TTCGATCATAAATTAGTTTATAT	GCTGATGCTGGACATACACCTATATTATTGGAAGCTAGAGATGTTTTAGGAGGAAAGATC----------TTCATAATATATTTTTATATTTTGATCATAAATTAGTTTATAT	103	8	del	N/A
[truncated: 3,615 more rows]
