# Supplementary material for: CRISPR/Cas9-mediated editing of PHYTOENE DESATURASE gene in onion (Allium cepa L.)
Source: Front Plant Sci. 2023 Aug 28;14:1226911. doi: 10.3389/fpls.2023.1226911 (PMC10494252; doi:10.3389/fpls.2023.1226911)
Supplement: Supplementary file 2 [file DataSheet_2.xlsx]

## Sheet: Sheet1
#ID	WT Sequence	RGEN Treated Sequence	Length	Count	Type	HDR
1	TTTATATGTAAGAGAGTTTGTATACAATGAAATAGTATATGTGTAACAGGTTGCTGCTTGGAAAGACAAGGATGGGGATTGGTATGAAACAGG	TTTATATGTAAGAGAGTTTGTATACAATGAAATAGTATATGTGTAACAGGTTGCTGCTTGGAAAGACAAGGATGGGGATTGGTATGAAACAGG	93	1088786	WT	N/A
2	TTTATATGTAAGAGAGTTTGTATACAATGAAATAGTATATGTGTAACAGGTTGCTGCTTGGAAAGACAAGGATGGGGATTGGTATGAAACAGG	TTTATATGTAAGAGAGTTTGTATACAATGAAATAGTATATGTGTAACAGGTTGCTGCTTGGAAAGAC----ATGGGGATTGGTATGAAACAGG	89	7904	del	N/A
3	TTTATATGTAAGAGAGTTTGTATACAATGAAATAGTATATGTGTAACAGGTTGCTGCTTGGAAAGACAAGGATGGGGATTGGTATGAAACAGG	TTTATATGTAAGAGAGTTTGTATATAATGAAACAGTGTATGTGTAACAGGTTGCTGCTTGGAAAGAC----ATGGGGATTGGTATGAAACAGG	89	1316	del	N/A
4	TTTATATGTAAGAGAGTTTGTATACAATGAAATAGTATATGTGTAACAGGTTGCTGCTTGGAAAGACAAGGATGGGGATTGGTATGAAACAGG	TTTATATGTAAGAGAGTTTGTATACAATGAAACAGTGTATGTGTAACAGGTTGCTGCTTGGAAAGAC----ATGGGGATTGGTATGAAACAGG	89	764	del	N/A
5	TTTATATGTAAGAGAGTTTGTATACAATGAAATAGTATATGTGTAACAGGTTGCTGCTTGGAAAGACAAGGATGGGGATTGGTATGAAACAGG	TTTATATGTAAGAGAGTTTGTATACAATGAAATAGTATATGTGTAATAGGTTGCTGCTTGGAAAGAC----ATGGGGATTGGTATGAAACAGG	89	588	del	N/A
6	TTTATATGTAAGAGAGTTTGTATACAATGAAATAGTATATGTGTAACAGGTTGCTGCTTGGAAAGACAAGGATGGGGATTGGTATGAAACAGG	TTTATATGTAAGAGAGTTTGTATACAATGAAATAGTATATGTGTTATA-GTTGCTGCTTGGAAAGACAAGGATGGGGATTGGTATGAAACAGG	92	430	del	N/A
7	TTTATATGTAAGAGAGTTTGTATACAATGAAATAGTATATGTGTAACAGGTTGCTGCTTGGAAAGACAAGGATGGGGATTGGTATGAAACAGG	TTTATATGTAAGAGAGTTTGTATACAATGAAATAGTGTATGTGTAACAGGTTGCTGCTTGGAAAGAC----ATGGGGATTGGTATGAAACAGG	89	423	del	N/A
8	TTTATATGTAAGAGAGTTTGTATACAATGAAATAGTATATGTGTAACAGGTTGCTGCTTGGAAAGACAAGGATGGGGATTGGTATGAAACAGG	TTTATATGTAAGAGAGTTTGTATATAATGAAA-AGTGTATGTGTAACAGGTTGCTGCTTGGAAAGACAAGGATGGGGATTGGTATGAAACAGG	92	336	del	N/A
9	TTTATATGTAAGAGAGTTTGTATACAATGAAATAGTATATGTGTAACAGGTTGCTGCTTGGAAAGACAAGGATGGGGATTGGTATGAAACAGG	TTTATATGTAAGAGAGTTTGTATACAATGAAATAGTATATGTGTAACAGGTTGCTGCTTGGAAAGACAA----GGGGATTGGTATGAAACAGG	89	280	del	N/A
10	TTTATATGTAAGAGAGTTTGTATACAATGAAATAGTATATGTGTAACAGGTTGCTGCTTGGAAAGACAAGGATGGGGATTGGTATGAAACAGG	TTTATATGTAAGAGAGTTTGTATACAATGAAA-AGTGTATGTGTAACAGGTTGCTGCTTGGAAAGACAAGGATGGGGATTGGTATGAAACAGG	92	223	del	N/A
11	TTTATATGTAAGAGAGTTTGTATACAATGAAATAGTATATGTGTAACAGGTTGCTGCTTGGAAAGACAAGGATGGGGATTGGTATGAAACAGG	TTTATATGTAAGAGAGTTTGTATAAAATGAAATAGTATATGTGTTATA-GTTGCTGCTTGGAAAGACAAGGATGGGGATTGGTATGAAACAGG	92	68	del	N/A
12	TTTATATGTAAGAGAGTTTGTATACAATGAAATAGTATATGTGTAACAGGTTGCTGCTTGGAAAGACAAGGATGGGGATTGGTATGAAACAGG	TTTATATGTAAGAGAGTTTGTATACAATGAAATAGTATATGTGTAACAGGTTGCTGCTTGGAAAGAC----ATGGGGATTAGTATGAAACAGG	89	66	del	N/A
13	TTTATATGTAAGAGAGTTTGTATACAATGAAATAGTATATGTGTAACAGGTTGCTGCTTGGAAAGACAAGGATGGGGATTGGTATGAAACAGG	TTTATATGTAAGAGAGTTTGTATACAATGAAATAGTATATGTGTAACAGGTTGCTGCTTGGAAAGACAAGGAT-GGGATTGGTATGAAACAGG	92	42	del	N/A
14	TTTATATGTAAGAGAGTTTGTATACAATGAAATAGTATATGTGTAACAGGTTGCTGCTTGGAAAGACAAGGATGGGGATTGGTATGAAACAGG	TTTATATGTAAGAGAGTTTGTATACAATGAAATAGTATATGTGTAACAGGTTGCTGCTTGGAAAGAC----ATGGGGATTCGTATGAAACAGG	89	39	del	N/A
15	TTTATATGTAAGAGAGTTTGTATACAATGAAATAGTATATGTGTAACAGGTTGCTGCTTGGAAAGACAAGGATGGGGATTGGTATGAAACAGG	TTTATATGTAAGAGAGTTTGTATACAATGAAATAGTATATGTGTAACAGGTTGCTGC-TGGACATACAAGGATGGGGATTGGTATGAAACAGG	92	35	del	N/A
16	TTTATATGTAAGAGAGTTTGTATACAATGAAATAGTATATGTGTAACAGGTTGCTGCTTGGAAAGACAAGGATGGGGATTGGTATGAAACAGG	TTTATATGTAAGAGAGTTT-TATATAATGAAATAGTGTATGTGTAACAGGTTGCTGCTTGGAAAGACAAGGATGGGGATTGGTATGAAACAGG	92	34	del	N/A
17	TTTATATGTAAGAGAGTTTGTATACAATGAAATAGTATATGTGTAACAGGTTGCTGCTTGGAAAGACAAGGATGGGGATTGGTATGAAACAGG	TTTATATGTAAGAGAGTTTGTATACAATGAAATAGTATATGTGTAACAGGTTGCTGCTTGGAAAGAC----ATGGGGATTGGTATGACACAGG	89	32	del	N/A
18	TTTATATGTAAGAGAGTTTGTATACAATGAAATAGTATATGTGTAACAGGTTGCTGCTTGGAAAGACAAGGATGGGGATTGGTATGAAACAGG	TTTATATGTAACAGAGTTTGTATATAATGAAACAGTGTATGTGTAACAGGTTGCTGCTTGGAAAGAC----ATGGGGATTGGTATGAAACAGG	89	30	del	N/A
19	TTTATATGTAAGAGAGTTTGTATACAATGAAATAGTATATGTGTAACAGGTTGCTGCTTGGAAAGACAAGGATGGGGATTGGTATGAAACAGG	TTTATATGTAAGAGAGTTTGTATACAATGAAATAGTATATGTGTAACAGGTTGCTGCTTGGAAAGAC-AGGATGGGGATTGGTATGAAACAGG	92	28	del	N/A
20	TTTATATGTAAGAGAGTTTGTATACAATGAAATAGTATATGTGTAACAGGTTGCTGCTTGGAAAGACAAGGATGGGGATTGGTATGAAACAGG	TTTATATGTAAGAGAGTTTGTATACAATGAAATAGTATATGTGTAACAGGTTGCTGCTTGG-AAGACAAGGATGGGGATTGGTATGAAACAGG	92	27	del	N/A
21	TTTATATGTAAGAGAGTTTGTATACAATGAAATAGTATATGTGTAACAGGTTGCTGCTTGGAAAGACAAGGATGGGGATTGGTATGAAACAGG	TTTATATGTAAGAGAGTTTGTATACAATGAAATAGTATATGTGTAACAGGTTGCTGCTGGGAAAGAC----ATGGGGATTGGTATGAAACAGG	89	26	del	N/A
22	TTTATATGTAAGAGAGTTTGTATACAATGAAATAGTATATGTGTAACAGGTTGCTGCTTGGAAAGACAAGGATGGGGATTGGTATGAAACAGG	TTTATATGTAAGAGAGTTTGTATACAATG-AATAGTATATGTGTAACAGGTTGCTGCTTGGAAAGACAAGGATGGGGATTGGTATGAAACAGG	92	24	del	N/A
23	TTTATATGTAAGAGAGTTTGTATACAATGAAATAGTATATGTGTAACAGGTTGCTGCTTGGAAAGACAAGGATGGGGATTGGTATGAAACAGG	TTTATATGTAAGAGAGTTT-TATATAATGAAATAGTGTATGTGTAACAGGTTGCTACTTGGAAAGACAAGGATGGGGATTGGTATGAAACAGG	92	24	del	N/A
24	TTTATATGTAAGAGAGTTTGTATACAATGAAATAGTATATGTGTAACAGGTTGCTGCTTGGAAAGACAAGGATGGGGATTGGTATGAAACAGG	TTTATATGTAAGAGAGTTTGTATACAATGAAATAGTATATGTGTAACAGGGTGCTGCTTGGAAAGAC----ATGGGGATTGGTATGAAACAGG	89	19	del	N/A
25	TTTATATGTAAGAGAGTTTGTATACAATGAAATAGTATATGTGTAACAGGTTGCTGCTTGGAAAGACAAGGATGGGGATTGGTATGAAACAGG	TTTATATGTAAGAGAGTTTGTATACAATGAAATAGTATATGTGTAACGGGTTGCTGCTTGGAAAGAC----ATGGGGATTGGTATGAAACAGG	89	18	del	N/A
26	TTTATATGTAAGAGAGTTTGTATACAATGAAATAGTATATGTGTAACAGGTTGCTGCTTGGAAAGACAAGGATGGGGATTGGTATGAAACAGG	TTTATATGTAAGAGAGTTTGTATACAATGAAATAGTATATGTGTAATAGGTTGCTGCTTGGAAAGACAA----GGGGATTGGTATGAAACAGG	89	17	del	N/A
27	TTTATATGTAAGAGAGTTTGTATACAATGAAATAGTATATGTGTAACAGGTTGCTGCTTGGAAAGACAAGGATGGGGATTGGTATGAAACAGG	TTTATATGTAAGAGAGTTTGTATACAATGAAATAGTATATGTGT-ACAGGTTGCTGCTTGGAAAGACAAGGATGGGGATTGGTATGAAACAGG	92	17	del	N/A
28	TTTATATGTAAGAGAGTTTGTATACAATGAAATAGTATATGTGTAACAGGTTGCTGCTTGGAAAGACAAGGATGGGGATTGGTATGAAACAGG	TTTATATGTAAGAAAGTTTGTATATAATGAAACAGTGTATGTGTAACAGGTTGCTGCTTGGAAAGAC----ATGGGGATTGGTATGAAACAGG	89	16	del	N/A
29	TTTATATGTAAGAGAGTTTGTATACAATGAAATAGTATATGTGTAACAGGTTGCTGCTTGGAAAGACAAGGATGGGGATTGGTATGAAACAGG	TTTATATGTAAGAGAGTTTGTATACAATGAAATAGTATATGTGTAACAGGTTGCTGCTTGGAAAGAC----ATGGGGATTGGTATGAAACACG	89	16	del	N/A
30	TTTATATGTAAGAGAGTTTGTATACAATGAAATAGTATATGTGTAACAGGTTGCTGCTTGGAAAGACAAGGATGGGGATTGGTATGAAACAGG	TTTATATGTAAGAGAGTTTGTATACAATGAAATAGTATATGTGTAACAGGTTGCTGATTGGAAAGAC----ATGGGGATTGGTATGAAACAGG	89	16	del	N/A
31	TTTATATGTAAGAGAGTTTGTATACAATGAAATAGTATATGTGTAACAGGTTGCTGCTTGGAAAGACAAGGATGGGGATTGGTATGAAACAGG	TTTATATGTAAGAGAGTTTGTATATAATGGAATAGTGTATGTGTAACGGGTTGCTGCTTGGAAAGAC----ATGGGGATTGGTATGAAACAGG	89	14	del	N/A
32	TTTATATGTAAGAGAGTTTGTATACAATGAAATAGTATATGTGTAACAGGTTGCTGCTTGGAAAGACAAGGATGGGGATTGGTATGAAACAGG	TTTATATGTAAGAGAGTTTGTATACAATGAAATAGTATATGTGTAACAGGTTGCTGGTTGGAAAGAC----ATGGGGATTGGTATGAAACAGG	89	13	del	N/A
33	TTTATATGTAAGAGAGTTTGTATACAATGAAATAGTATATGTGTAACAGGTTGCTGCTTGGAAAGACAAGGATGGGGATTGGTATGAAACAGG	TTTATATGTAAGAGAGTTTGTATATAATGAAACAGTGTATGTGTAACAGGTTGCTGCTTGGAAAGAC----ATGGGGATTAGTATGAAACAGG	89	13	del	N/A
34	TTTATATGTAAGAGAGTTTGTATACAATGAAATAGTATATGTGTAACAGGTTGCTGCTTGGAAAGACAAGGATGGGGATTGGTATGAAACAGG	TTTATATGTAAGAGAGTTTGTATATAATGAAA-AGTGTATGTGTAACAGGTTGCTGCTTGGAAAGAC----ATGGGGATTGGTATGAAACAGG	88	11	del	N/A
35	TTTATATGTAAGAGAGTTTGTATACAATGAAATAGTATATGTGTAACAGGTTGCTGCTTGGAAAGACAAGGATGGGGATTGGTATGAAACAGG	TTTATATGTAAGAGAGTTTGTATACAATGAAATAGTATATGTGTAATA-GTTGCTGCTTGGAAAGACAAGGATGGGGATTGGTATGAAACAGG	92	11	del	N/A
36	TTTATATGTAAGAGAGTTTGTATACAATGAAATAGTATATGTGTAACAGGTTGCTGCTTGGAAAGACAAGGATGGGGATTGGTATGAAACAGG	TTTATATGTAAGAGAGTTTGTATACAATGAAATAGTATATGTGTAACAGGTTGCTGCTTGGAAAGAC----ATGGGGATTTGTATGAAACAGG	89	11	del	N/A
37	TTTATATGTAAGAGAGTTTGTATACAATGAAATAGTATATGTGTAACAGGTTGCTGCTTGGAAAGACAAGGATGGGGATTGGTATGAAACAGG	TTTATATGTAAGAGAGTTTGTATACAATGAAATAGTATATGTGTAACAGGTTGCTGCTTGGAAAGAC----ATGGGGATTGGTATGAAACATG	89	11	del	N/A
38	TTTATATGTAAGAGAGTTTGTATACAATGAAATAGTATATGTGTAACAGGTTGCTGCTTGGAAAGACAAGGATGGGGATTGGTATGAAACAGG	TTTATATGTAAGAGAGTTTGTATATAATGGAATAGTGTATGTGTAACAGGTTGCTGCTTGGAAAGAC----ATGGGGATTGGTATGAAACAGG	89	10	del	N/A
39	TTTATATGTAAGAGAGTTTGTATACAATGAAATAGTATATGTGTAACAGGTTGCTGCTTGGAAAGACAAGGATGGGGATTGGTATGAAACAGG	TTTATATGTAAGAGAGTTTGTATACAATGAAATAGTATATGTGTAACAGGTTGCTGCTTGGAAAGAC----ATGGGGATTGGTATGAAACAGA	89	10	del	N/A
40	TTTATATGTAAGAGAGTTTGTATACAATGAAATAGTATATGTGTAACAGGTTGCTGCTTGGAAAGACAAGGATGGGGATTGGTATGAAACAGG	TTTATATGTAACAGAGTTTGTATATAATGAAA-AGTGTATGTGTAACAGGTTGCTGCTTGGAAAGACAAGGATGGGGATTGGTATGAAACAGG	92	10	del	N/A
41	TTTATATGTAAGAGAGTTTGTATACAATGAAATAGTATATGTGTAACAGGTTGCTGCTTGGAAAGACAAGGATGGGGATTGGTATGAAACAGG	TTTATATGTAAGAGAGTTTGTATACAATGAAATAGTATATGTGTAACAGGTTGCTGCTTGGAAAGACGAGGATGGGGATTGGTATGAAACAGT	93	9	Sub	N/A
42	TTTATATGTAAGAGAGTTTGTATACAATGAAATAGTATATGTGTAACAGGTTGCTGCTTGGAAAGACAAGGATGGGGATTGGTATGAAACAGG	TTTATATGTAAGAGAGTTTGTATACAATGAAATAGTATATGTGTAACAGGTTGCTGCTTGGAAAGACGAGGATGGGGCTTGGTATGAAACAGG	93	9	Sub	N/A
43	TTTATATGTAAGAGAGTTTGTATACAATGAAATAGTATATGTGTAACAGGTTGCTGCTTGGAAAGACAAGGATGGGGATTGGTATGAAACAGG	TTTATTTGTAAGAGAGTTTGTATACAATGAAATAGTATATGTGTAACAGGTTGCTGCTTGGAAAGACAAGGATGGGGATTGGTATGAAACAGG	93	9	Sub	N/A
44	TTTATATGTAAGAGAGTTTGTATACAATGAAATAGTATATGTGTAACAGGTTGCTGCTTGGAAAGACAAGGATGGGGATTGGTATGAAACAGG	TTTATATGTAAGAGGGTTTGTATACAATGAAATAGTATATGTGTAACAGGTTGCTGCTTGGAAAGACAAAGATGGGGATTGGTATGAAACAGG	93	9	Sub	N/A
45	TTTATATGTAAGAGAGTTTGTATACAATGAAATAGTATATGTGTAACAGGTTGCTGCTTGGAAAGACAAGGATGGGGATTGGTATGAAACAGG	TTTATATGTAAGAGAGTTTGTATACAATGAAATAGTATATGTGTAACAGGTTGCCGCTTGGAAAGACAAGGATGGGGATTGGCATGAAACAGG	93	9	Sub	N/A
46	TTTATATGTAAGAGAGTTTGTATACAATGAAATAGTATATGTGTAACAGGTTGCTGCTTGGAAAGACAAGGATGGGGATTGGTATGAAACAGG	TTTATATGTAAGAGAGTTTGTATACAATGAAATAGTATATGTGTAACCGGTTGCTGCTTGGAAAGATAAGGATGGGGATTGGTATGAAACAGG	93	9	Sub	N/A
47	TTTATATGTAAGAGAGTTTGTATACAATGAAATAGTATATGTGTAACAGGTTGCTGCTTGGAAAGACAAGGATGGGGATTGGTATGAAACAGG	TTTATATGTAAGAGAGTTTGTATACAATGAAAAAGTATATGTGTAACAGGTTGCTGCTTGGAAAGACAAGGATGGGGATTGGTATGAAACAGG	93	9	Sub	N/A
48	TTTATATGTAAGAGAGTTTGTATACAATGAAATAGTATATGTGTAACAGGTTGCTGCTTGGAAAGACAAGGATGGGGATTGGTATGAAACAGG	TTTACATGTAAGAGAGTTTGTATACAATGAGATAGTATATGTGTAACAGGTTGCTGCTTGGAAAGACAAGGATGGGGATTGGTATGAAACAGG	93	9	Sub	N/A
49	TTTATATGTAAGAGAGTTTGTATACAATGAAATAGTATATGTGTAACAGGTTGCTGCTTGGAAAGACAAGGATGGGGATTGGTATGAAACAGG	TTTATATGTAAGAGAGTTTGTATACAATGAAATAGTATATGTGTAATAGGTTGCTGCTTGGAAAGACAAGGATGGGGAGTGGTATGAAACAGG	93	9	Sub	N/A
50	TTTATATGTAAGAGAGTTTGTATACAATGAAATAGTATATGTGTAACAGGTTGCTGCTTGGAAAGACAAGGATGGGGATTGGTATGAAACAGG	TTTATATGTAAGAGAGTTTGTATACAATGAAAGAGTATATGTGTAACAGGTTGCTGCTTGGAAAGACAAGGATGGGGATTGGTATGAAACAGG	93	9	Sub	N/A
51	TTTATATGTAAGAGAGTTTGTATACAATGAAATAGTATATGTGTAACAGGTTGCTGCTTGGAAAGACAAGGATGGGGATTGGTATGAAACAGG	TTTATATGTTAGAGAGTTTGTATACAATGAAATAGTATATGTGTAACAGGTTGCTGCTTGGAAAGACAAGGATGGGGATTGGTATGAAACAGG	93	9	Sub	N/A
52	TTTATATGTAAGAGAGTTTGTATACAATGAAATAGTATATGTGTAACAGGTTGCTGCTTGGAAAGACAAGGATGGGGATTGGTATGAAACAGG	TTTATATGTAAGAGAGTTTGTATACAATGAAATAGTATATGTGTAACAGGTTGCTGCTTGGAAAGACAAGGATCGGGATTGGTATGAAACAGG	93	9	Sub	N/A
53	TTTATATGTAAGAGAGTTTGTATACAATGAAATAGTATATGTGTAACAGGTTGCTGCTTGGAAAGACAAGGATGGGGATTGGTATGAAACAGG	TTTATGTGTAAGAGAGTTTGTATACAATGAAATAGTATATGTGTAATAGGTTGCTGCTTGGAAAGACAAGGATGGGGATTGGTATGAAACAGG	93	9	Sub	N/A
54	TTTATATGTAAGAGAGTTTGTATACAATGAAATAGTATATGTGTAACAGGTTGCTGCTTGGAAAGACAAGGATGGGGATTGGTATGAAACAGG	TTTATATGTAAGAGAGTTTGTATACAATGAAATAGTATATGCGCAACAGGTTGCTGCTTGGAAAGACAAGGATGGGGATTGGTATGAAACAGG	93	9	Sub	N/A
55	TTTATATGTAAGAGAGTTTGTATACAATGAAATAGTATATGTGTAACAGGTTGCTGCTTGGAAAGACAAGGATGGGGATTGGTATGAAACAGG	TTTATATGTAAGAGAGTTTGTATACAATGAAATAGTATATGTGTAACGGGTTGCGGCTTGGAAAGACAAGGATGGGGATTGGTATGAAACAGG	93	9	Sub	N/A
56	TTTATATGTAAGAGAGTTTGTATACAATGAAATAGTATATGTGTAACAGGTTGCTGCTTGGAAAGACAAGGATGGGGATTGGTATGAAACAGG	TTTATATGTAAGAGAGTTTGTATACAATGAAATAGTATATGTGTAACAGGTTGCTGCTTGGAAAGACATGGATGGGGATTTGTATGAAACAGG	93	9	Sub	N/A
57	TTTATATGTAAGAGAGTTTGTATACAATGAAATAGTATATGTGTAACAGGTTGCTGCTTGGAAAGACAAGGATGGGGATTGGTATGAAACAGG	TTTATAGGTAAGAGAGTTTGTATACAATGAAATAGTATATGTGTAACAGGTTGCTGCTTGGAAAGACAAGGATGGGGATTGGTATGAAACAGG	93	9	Sub	N/A
58	TTTATATGTAAGAGAGTTTGTATACAATGAAATAGTATATGTGTAACAGGTTGCTGCTTGGAAAGACAAGGATGGGGATTGGTATGAAACAGG	TTTATATGTAAGAGAGTTTGTATACAATGAAATAGTATATGTGTAATGGGTTGATGCTTGGAAAGACGAGGATGGGGATTGGTATGAAACAGG	93	9	Sub	N/A
59	TTTATATGTAAGAGAGTTTGTATACAATGAAATAGTATATGTGTAACAGGTTGCTGCTTGGAAAGACAAGGATGGGGATTGGTATGAAACAGG	TTTATATGTAAGAGAGTTTGTATACAATGAAATAGTATATGTGTAACGGGTTGCTGCTTGGAAAGACAAGGATGGGGATTGGTATGGAACAGG	93	9	Sub	N/A
60	TTTATATGTAAGAGAGTTTGTATACAATGAAATAGTATATGTGTAACAGGTTGCTGCTTGGAAAGACAAGGATGGGGATTGGTATGAAACAGG	TTTATATGTAAGAGAGTTTGTATACAATGAAATAGTATATGTGTAACGGGTTGCTGCTTGGAAAGACAAGGATGGGGATTGGTATGATACAGG	93	9	Sub	N/A
61	TTTATATGTAAGAGAGTTTGTATACAATGAAATAGTATATGTGTAACAGGTTGCTGCTTGGAAAGACAAGGATGGGGATTGGTATGAAACAGG	TTTATATGTAAGAGAGTTTGTATACAATGAAATAGTATATGTGTAACAGGTTGCTGCTTGGAAAGACACGGATGGGGATTGATATGAAACAGG	93	9	Sub	N/A
62	TTTATATGTAAGAGAGTTTGTATACAATGAAATAGTATATGTGTAACAGGTTGCTGCTTGGAAAGACAAGGATGGGGATTGGTATGAAACAGG	TTTATATGTAAGAGAGTTTGTATACAATGAAATAGTATATGTGTAACAGGTTGCTGCTTGGAAAGACACGGATGGGGATTTGTATGAAACAGG	93	9	Sub	N/A
63	TTTATATGTAAGAGAGTTTGTATACAATGAAATAGTATATGTGTAACAGGTTGCTGCTTGGAAAGACAAGGATGGGGATTGGTATGAAACAGG	TTTATATGTAAGAGAGTTTGTATACAATGAAATAGTATATGCGTAATAGGTTGCTGCTTGGAAAGACAAGGATGGGGATTGGTATGAAACAGG	93	9	Sub	N/A
64	TTTATATGTAAGAGAGTTTGTATACAATGAAATAGTATATGTGTAACAGGTTGCTGCTTGGAAAGACAAGGATGGGGATTGGTATGAAACAGG	TTTATATGTAAGAGAGTTTGTATACAATGAAATAGTATATGTGTAACAGGTTGCTGCTTGGAAAGATAAGGATGGGGATTGGTATGTAACAGG	93	9	Sub	N/A
65	TTTATATGTAAGAGAGTTTGTATACAATGAAATAGTATATGTGTAACAGGTTGCTGCTTGGAAAGACAAGGATGGGGATTGGTATGAAACAGG	TTTATATGTAAGAGAGTTTGTATACAATGAAATAGTATATGTGTCACAGGTTGCTGCTTGGAAAGACAAGGATGGGGATTGGTATGAAACAGG	93	9	Sub	N/A
66	TTTATATGTAAGAGAGTTTGTATACAATGAAATAGTATATGTGTAACAGGTTGCTGCTTGGAAAGACAAGGATGGGGATTGGTATGAAACAGG	TTTATATGTAAGAGAGTTTGTATACAATGAAATAGTATATGTGTAACAGGTTGCTGCTTGGAAAGAC----ATGGGGATTGGGATGAAACAGG	89	9	del	N/A
67	TTTATATGTAAGAGAGTTTGTATACAATGAAATAGTATATGTGTAACAGGTTGCTGCTTGGAAAGACAAGGATGGGGATTGGTATGAAACAGG	TTTATATGTAAGAGAGTTTGTATACAATGAAATAGTATAGGTGTAACAGGTTGCTGCTTGGAAAGACAAGGATGGGGATTGGTATGAAACAGG	93	9	Sub	N/A
68	TTTATATGTAAGAGAGTTTGTATACAATGAAATAGTATATGTGTAACAGGTTGCTGCTTGGAAAGACAAGGATGGGGATTGGTATGAAACAGG	TTTATATATAAGAGAGTTTGTATACAATGAAATAGTATATGTGTAATAGGTTGCTGCTTGGAAAGACAAGGATGGGGATTGGTATGAAACAGG	93	9	Sub	N/A
69	TTTATATGTAAGAGAGTTTGTATACAATGAAATAGTATATGTGTAACAGGTTGCTGCTTGGAAAGACAAGGATGGGGATTGGTATGAAACAGG	TTTATATGTAAGAGAGTTTGTATACAATGAAATAGTATATGTGTAACAGGTTGCTGCTTGGAAAGACGAGGATGGGGATTGGTATGAAACACG	93	9	Sub	N/A
70	TTTATATGTAAGAGAGTTTGTATACAATGAAATAGTATATGTGTAACAGGTTGCTGCTTGGAAAGACAAGGATGGGGATTGGTATGAAACAGG	TTTATATGTAAGAGAGTTTGTATACAATGAAATAGTATACGTGTAATAGGTTGCTGCTTGGAAAGACAAGGATGGGGATTGGTATGAAACAGG	93	9	Sub	N/A
71	TTTATATGTAAGAGAGTTTGTATACAATGAAATAGTATATGTGTAACAGGTTGCTGCTTGGAAAGACAAGGATGGGGATTGGTATGAAACAGG	TTTATATGTAAGAGAGTTTGTATACAATGAAATAGTATATGTGTAACAGGTTGCTGCTTGGAAAGACGAGGATGGGGATTGGTATGAAACATG	93	9	Sub	N/A
72	TTTATATGTAAGAGAGTTTGTATACAATGAAATAGTATATGTGTAACAGGTTGCTGCTTGGAAAGACAAGGATGGGGATTGGTATGAAACAGG	TTTATATGTAAGAGAGTTTGTATACAATGAAATAGTATATGTGTAACAGGTTGCTGCTTGGAAAGACGAGGATGGGGATTGGGATGAAACAGG	93	9	Sub	N/A
73	TTTATATGTAAGAGAGTTTGTATACAATGAAATAGTATATGTGTAACAGGTTGCTGCTTGGAAAGACAAGGATGGGGATTGGTATGAAACAGG	TTTATATGTAAGAGAGTTTGTATACAATGAAATAGTACATGTGTAACAGGTTGCTGCTTGAAAAGACAAGGATGGGGATTGGTATGAAACAGG	93	9	Sub	N/A
74	TTTATATGTAAGAGAGTTTGTATACAATGAAATAGTATATGTGTAACAGGTTGCTGCTTGGAAAGACAAGGATGGGGATTGGTATGAAACAGG	TTTATATGTAAGAGAGTTTGTATACAATGAAATAGTATATGTGTAACCGGTTGCTGCTTGGAAAGACTAGGATGGGGATTGGTATGAAACAGG	93	9	Sub	N/A
75	TTTATATGTAAGAGAGTTTGTATACAATGAAATAGTATATGTGTAACAGGTTGCTGCTTGGAAAGACAAGGATGGGGATTGGTATGAAACAGG	TTTATATGTAAGAGAGTTTGTATATAATGAAACAGTATATGTGTAACAGGTTGCTGCTTGGAAAGACAAGGATGGGGATTGGTATGAAACAGG	93	9	Sub	N/A
76	TTTATATGTAAGAGAGTTTGTATACAATGAAATAGTATATGTGTAACAGGTTGCTGCTTGGAAAGACAAGGATGGGGATTGGTATGAAACAGG	TTTATATGTAAGAGAGTTTGTATACAATGAAATAGTATATGTGTAACAGGTTGCTGCGTGGAAAGAC----ATGGGGATTGGTATGAAACAGG	89	9	del	N/A
77	TTTATATGTAAGAGAGTTTGTATACAATGAAATAGTATATGTGTAACAGGTTGCTGCTTGGAAAGACAAGGATGGGGATTGGTATGAAACAGG	TTTATATGTAAGAGAGTTTGTATACAATGAAATAGTATATGTGTAACCGGTTGCTGCTTGGAAAGACAAGGATGGGGATTGATATGAAACAGG	93	9	Sub	N/A
78	TTTATATGTAAGAGAGTTTGTATACAATGAAATAGTATATGTGTAACAGGTTGCTGCTTGGAAAGACAAGGATGGGGATTGGTATGAAACAGG	TTTATATGTAAGAGAGTTTGTATACAATGAAATAGTATATGTGTAACAGGTTGATGCTTGGAAAGAAAAGGATGGGGATTTGTATGAAACAGG	93	9	Sub	N/A
79	TTTATATGTAAGAGAGTTTGTATACAATGAAATAGTATATGTGTAACAGGTTGCTGCTTGGAAAGACAAGGATGGGGATTGGTATGAAACAGG	TTTATATGTAAGAGAGTTTGTATACAATGAAATAGTATATGTGTAACCGGTTGATGCTTGGAAAGACAAGGATGGGGATTGGTATGAAACAGG	93	9	Sub	N/A
80	TTTATATGTAAGAGAGTTTGTATACAATGAAATAGTATATGTGTAACAGGTTGCTGCTTGGAAAGACAAGGATGGGGATTGGTATGAAACAGG	TTTATATGTAAGAGAGTTTGTATACAATGAAATAGTATATGTGTAACTGGTTGCTGCTTGGAAAGACATGGATGGGGATTGGTATGAAACAGG	93	9	Sub	N/A
81	TTTATATGTAAGAGAGTTTGTATACAATGAAATAGTATATGTGTAACAGGTTGCTGCTTGGAAAGACAAGGATGGGGATTGGTATGAAACAGG	TTTATATGTAAGAGAGTTTGTATACAATGAAATAGTATATGTGTAACAGGGTGCTGCGTGGAAAGACAAGGATGGGGATTGGTATGAAACAGG	93	9	Sub	N/A
82	TTTATATGTAAGAGAGTTTGTATACAATGAAATAGTATATGTGTAACAGGTTGCTGCTTGGAAAGACAAGGATGGGGATTGGTATGAAACAGG	TTAATATGTAAGAGAGTTTGTATACAATGAGATAGTATATGTGTAACAGGTTGCTGCTTGGAAAGACAAGGATGGGGATTGGTATGAAACAGG	93	9	Sub	N/A
83	TTTATATGTAAGAGAGTTTGTATACAATGAAATAGTATATGTGTAACAGGTTGCTGCTTGGAAAGACAAGGATGGGGATTGGTATGAAACAGG	TTTATATGTAAGAGAGTTTGTATACAATGAAATAGTATATGTGTAACAGGTTGCTGCTTGGAAAGACATGGATGGGGATTGGTATGACACAGG	93	9	Sub	N/A
84	TTTATATGTAAGAGAGTTTGTATACAATGAAATAGTATATGTGTAACAGGTTGCTGCTTGGAAAGACAAGGATGGGGATTGGTATGAAACAGG	TTTATATGTAATAGAGTTTGTATACAATGAAATAGTATATGTGTAATAGGTTGCTGCTTGGAAAGACAAGGATGGGGATTGGTATGAAACAGG	93	9	Sub	N/A
85	TTTATATGTAAGAGAGTTTGTATACAATGAAATAGTATATGTGTAACAGGTTGCTGCTTGGAAAGACAAGGATGGGGATTGGTATGAAACAGG	TTTATATGTAAGAGAGTTTGTATACAATGAAATAGTATATGTGTAACGGGTTGCTGCTTGGAAAGAAAAGGATGGGGATTAGTATGAAACAGG	93	9	Sub	N/A
86	TTTATATGTAAGAGAGTTTGTATACAATGAAATAGTATATGTGTAACAGGTTGCTGCTTGGAAAGACAAGGATGGGGATTGGTATGAAACAGG	TTTATATGTAAGAGAGTTTGTATACAATGAAATAGTATATGTGTAACAGGTTGCTGCTTGGAACGACAAGGATGGGGATTGGTATGAAACACG	93	9	Sub	N/A
87	TTTATATGTAAGAGAGTTTGTATACAATGAAATAGTATATGTGTAACAGGTTGCTGCTTGGAAAGACAAGGATGGGGATTGGTATGAAACAGG	TTTATATGTAAGAGAGTTTGTATACAATGAAATAGTATATGTGTAATAGGTTGCTGCTTGGAAAGACACGGATGGGGATTCGTATGAAACAGG	93	9	Sub	N/A
88	TTTATATGTAAGAGAGTTTGTATACAATGAAATAGTATATGTGTAACAGGTTGCTGCTTGGAAAGACAAGGATGGGGATTGGTATGAAACAGG	TTTATATGTAAGAGAGTTTGTATACAATGAAATAGTATATGTGTAACAGGTTGCGGCTTGGAAAGACAAGGATGGGGATTGGTATGCAACAGG	93	9	Sub	N/A
89	TTTATATGTAAGAGAGTTTGTATACAATGAAATAGTATATGTGTAACAGGTTGCTGCTTGGAAAGACAAGGATGGGGATTGGTATGAAACAGG	TTTATATGTAAGAGAGTTTGTATACAATGAAATAGTATATGTGTAACAGGTTGCTGCTTGGCAAGAAAAGGATGGGGATTGGTATGAAACAGG	93	9	Sub	N/A
90	TTTATATGTAAGAGAGTTTGTATACAATGAAATAGTATATGTGTAACAGGTTGCTGCTTGGAAAGACAAGGATGGGGATTGGTATGAAACAGG	TTTATATGTAAGAGAGTTTGTATACAATGAAATAGTATATGTGTAACAGGTTGCTGCTTGGAAAGACCAGGATGGGGCTTAGTATGAAACAGG	93	9	Sub	N/A
91	TTTATATGTAAGAGAGTTTGTATACAATGAAATAGTATATGTGTAACAGGTTGCTGCTTGGAAAGACAAGGATGGGGATTGGTATGAAACAGG	TTTATATGTAAGAGAGTTTGTATACAATGAAATAGTATATGTGTAACAGGTTGCTGCTTGGAAAGACAATCATGGGGATTGGTATGAAACAGG	93	9	Sub	N/A
92	TTTATATGTAAGAGAGTTTGTATACAATGAAATAGTATATGTGTAACAGGTTGCTGCTTGGAAAGACAAGGATGGGGATTGGTATGAAACAGG	TTTATATGTAAGAGCGTTTGTATACAATGAAATAGTATATGTGTAACAGGTTGCTGCTTGGAAAGACAAGGATGGGGATTAGTATGAAACAGG	93	9	Sub	N/A
93	TTTATATGTAAGAGAGTTTGTATACAATGAAATAGTATATGTGTAACAGGTTGCTGCTTGGAAAGACAAGGATGGGGATTGGTATGAAACAGG	TTTATATGTAAGAGAGTTTGTATACAATGAAATAGTATATGTGTAACAGGTTGCTGCTTGGAGAGACAAGGATGGGGATTGGTATGAAACACG	93	9	Sub	N/A
94	TTTATATGTAAGAGAGTTTGTATACAATGAAATAGTATATGTGTAACAGGTTGCTGCTTGGAAAGACAAGGATGGGGATTGGTATGAAACAGG	TTTATATGTAAGAGAGTTTGTATACAATGAAATAGTATATGTGTAACAGGTTGCTGCTTGGAAACACAAGGATGGGGATTAGTATGAAACAGG	93	9	Sub	N/A
95	TTTATATGTAAGAGAGTTTGTATACAATGAAATAGTATATGTGTAACAGGTTGCTGCTTGGAAAGACAAGGATGGGGATTGGTATGAAACAGG	TTTATATGTAAGAGAGTTTGTATACAATGAAATAGTATATGTGTAACAGGTTGCTGCTTGGAAATACAAGGATGGGGATTTGTATGAAACAGG	93	9	Sub	N/A
96	TTTATATGTAAGAGAGTTTGTATACAATGAAATAGTATATGTGTAACAGGTTGCTGCTTGGAAAGACAAGGATGGGGATTGGTATGAAACAGG	TTTATATGTAAGAGAGTTTGTATACAATGAAATACTATATGTGTAACAGGTTGCTGCTTGGAAAGACAAGGATGGGGATTGGTAAGAAACAGG	93	9	Sub	N/A
97	TTTATATGTAAGAGAGTTTGTATACAATGAAATAGTATATGTGTAACAGGTTGCTGCTTGGAAAGACAAGGATGGGGATTGGTATGAAACAGG	TTTATATGTAAGAGAGTTTGTATACAATGAAATAGTATATGTGTAACAGGTTGCTGCTTGGCAAGTCAAGGATGGGGATTGGTATGAAACAGG	93	9	Sub	N/A
98	TTTATATGTAAGAGAGTTTGTATACAATGAAATAGTATATGTGTAACAGGTTGCTGCTTGGAAAGACAAGGATGGGGATTGGTATGAAACAGG	TTTATATGTAAGAGAGTTTGTATACAATGAAATAGTATATGTGTAACAGGTTGCGGCTTGGAAAGACAAGGATGGGGACTGGTATGAAACAGG	93	9	Sub	N/A
99	TTTATATGTAAGAGAGTTTGTATACAATGAAATAGTATATGTGTAACAGGTTGCTGCTTGGAAAGACAAGGATGGGGATTGGTATGAAACAGG	TTTATATGTAAGAGAGTTTGTATACAATGAAATAGTATATGTGTAACAGGTTGCTGCTTGCAAAGACAAGGATGGGGATTGGTGTGAAACAGG	93	9	Sub	N/A
100	TTTATATGTAAGAGAGTTTGTATACAATGAAATAGTATATGTGTAACAGGTTGCTGCTTGGAAAGACAAGGATGGGGATTGGTATGAAACAGG	TTTATATGTAAGAGAGTTTGTATACAATGAAATAGTATATGTGTAATCGCTTGCTGCTTGGAAAGACAAGGATGGGGATTGGTATGAAACAGG	93	9	Sub	N/A
101	TTTATATGTAAGAGAGTTTGTATACAATGAAATAGTATATGTGTAACAGGTTGCTGCTTGGAAAGACAAGGATGGGGATTGGTATGAAACAGG	TTTATATGTAAGAGAGTTTGTATACAATGAAATAGTATATGTGTAACAGCTTGCTGCTTGGAAAGACAAGGATGGGGATTGGCATGAAACAGG	93	9	Sub	N/A
102	TTTATATGTAAGAGAGTTTGTATACAATGAAATAGTATATGTGTAACAGGTTGCTGCTTGGAAAGACAAGGATGGGGATTGGTATGAAACAGG	TTTATATGTAAGAGAGTTTGTATACAATGAAATAGTATATGTGTAATAGGTTGCTGCTTTGAAAGACAAGGATGGGGATTAGTATGAAACAGG	93	9	Sub	N/A
103	TTTATATGTAAGAGAGTTTGTATACAATGAAATAGTATATGTGTAACAGGTTGCTGCTTGGAAAGACAAGGATGGGGATTGGTATGAAACAGG	TTTATATGTAAGAGAGTTTGTATACAATGAAATAGTATATGTGTAATAGGTTGCTGCTTCGAAAGACAAGGATGGGGATTTGTATGAAACAGG	93	9	Sub	N/A
104	TTTATATGTAAGAGAGTTTGTATACAATGAAATAGTATATGTGTAACAGGTTGCTGCTTGGAAAGACAAGGATGGGGATTGGTATGAAACAGG	TTTATATGTAAGAGAGTTTGTATACAATGAAATAGTATATGTGTAACGGGTTGCTGCTTGGAAATACAAGGATGGGGATTGGTATGAAACAGG	93	9	Sub	N/A
105	TTTATATGTAAGAGAGTTTGTATACAATGAAATAGTATATGTGTAACAGGTTGCTGCTTGGAAAGACAAGGATGGGGATTGGTATGAAACAGG	TTTATATGTAAGAGAGTTTGTATACAATGAAATAGTATATGTGTAATAGGTTGCTGCTTGGACAGACAAGGATGGGGATTGGTATGAAACAGG	93	9	Sub	N/A
106	TTTATATGTAAGAGAGTTTGTATACAATGAAATAGTATATGTGTAACAGGTTGCTGCTTGGAAAGACAAGGATGGGGATTGGTATGAAACAGG	TTTATATGTAAGAGAGTTTGTATACAATGAAATAGTATATGTGTAACAGGTTGCTGCTTGGAAAGAAAAGGATGGGGATTGGTATGAAACAGT	93	8	Sub	N/A
107	TTTATATGTAAGAGAGTTTGTATACAATGAAATAGTATATGTGTAACAGGTTGCTGCTTGGAAAGACAAGGATGGGGATTGGTATGAAACAGG	TTTATATGTAAGAGAGTTTGTATACAATGAAATAGTATATGTGTAACAGGTTGCTGCTTGGAAAGATCAGGATGGGGATTGGTATGAAACAGG	93	8	Sub	N/A
108	TTTATATGTAAGAGAGTTTGTATACAATGAAATAGTATATGTGTAACAGGTTGCTGCTTGGAAAGACAAGGATGGGGATTGGTATGAAACAGG	TTTATATGTAAGAGAGTTTGTATACAATGAAATAGTATATGTGTAACAGGTTGCTGCTTGGAAAGACCAGGATGGGGATTGGTATGAAACAGC	93	8	Sub	N/A
109	TTTATATGTAAGAGAGTTTGTATACAATGAAATAGTATATGTGTAACAGGTTGCTGCTTGGAAAGACAAGGATGGGGATTGGTATGAAACAGG	TTTATATGTAAGAGAGTTTGTATACAATGAAATAGTATATGTGTAACAGGTTGCTGCTTGGAAAGAGAAGGATGGGGATTGGTATGAAACAGC	93	8	Sub	N/A
110	TTTATATGTAAGAGAGTTTGTATACAATGAAATAGTATATGTGTAACAGGTTGCTGCTTGGAAAGACAAGGATGGGGATTGGTATGAAACAGG	TTTATATGTAAGAGAGTTTGTATACAATGAAATAGTATATGTGTAATAGGTTGCTGCTTGGAAAGACAAGGATGGGGATTGGTATGAAACGGG	93	8	Sub	N/A
111	TTTATATGTAAGAGAGTTTGTATACAATGAAATAGTATATGTGTAACAGGTTGCTGCTTGGAAAGACAAGGATGGGGATTGGTATGAAACAGG	TTTATATGTAAGAGAGTTTGTATACAATGAAATAGTATATGTGTAACAGGTTGCTGCTTGGAAAGAGAAGGATGGGGATTGGGATGAAACAGG	93	8	Sub	N/A
112	TTTATATGTAAGAGAGTTTGTATACAATGAAATAGTATATGTGTAACAGGTTGCTGCTTGGAAAGACAAGGATGGGGATTGGTATGAAACAGG	TTTATATGTAAGAGAGTTTGTATACAATGAAATAGTATGTGTGTAATAGGTTGCTGCTTGGAAAGACAAGGATGGGGATTGGTATGAAACAGG	93	8	Sub	N/A
113	TTTATATGTAAGAGAGTTTGTATACAATGAAATAGTATATGTGTAACAGGTTGCTGCTTGGAAAGACAAGGATGGGGATTGGTATGAAACAGG	TTTATATGTAAGAGAGTTTGTATACAATGAAATAGTATATGTGGAACAGGTTGCTGCTTGGAAAGACAAGGATGGGGATTGGTATGAAACAGG	93	8	Sub	N/A
114	TTTATATGTAAGAGAGTTTGTATACAATGAAATAGTATATGTGTAACAGGTTGCTGCTTGGAAAGACAAGGATGGGGATTGGTATGAAACAGG	TTTATATGTAAGAGAGTTTGTATACAATGAAATAGTATATGTGTAACCGGTTGCTGCTTGGAAAGACGAGGATGGGGATTGGTATGAAACAGG	93	8	Sub	N/A
115	TTTATATGTAAGAGAGTTTGTATACAATGAAATAGTATATGTGTAACAGGTTGCTGCTTGGAAAGACAAGGATGGGGATTGGTATGAAACAGG	TTTATATGTAAGAGAGTTTGTATACAATGAAATAGTATATGTGTAACAGGTTGCTGCTTGGAAAGACCAGGATGGGGATTGGGATGAAACAGG	93	8	Sub	N/A
116	TTTATATGTAAGAGAGTTTGTATACAATGAAATAGTATATGTGTAACAGGTTGCTGCTTGGAAAGACAAGGATGGGGATTGGTATGAAACAGG	TTTATATGTAAGAGAGTTTGTATACAATGAAATAGTATATGTGTAAAAGGTTGCTGCTTGGAAAGACAAGGATGGGGATTGGTATGAAAAAGG	93	8	Sub	N/A
117	TTTATATGTAAGAGAGTTTGTATACAATGAAATAGTATATGTGTAACAGGTTGCTGCTTGGAAAGACAAGGATGGGGATTGGTATGAAACAGG	TTTATATGTAAGAGAGTTTGTATACAATGAAATAGTATATGTGTAACAGGTTGCTGCTTGGAAAGAC----ATGGGGATTGGTATGCAACAGG	89	8	del	N/A
118	TTTATATGTAAGAGAGTTTGTATACAATGAAATAGTATATGTGTAACAGGTTGCTGCTTGGAAAGACAAGGATGGGGATTGGTATGAAACAGG	TTTATATGTAAGAGAGTTTGTATACAATGAAATAGTATATGTGTAATAGGTTGCTGCTTGGAAAGACAAGGATGTGGATTGGTATGAAACAGG	93	8	Sub	N/A
119	TTTATATGTAAGAGAGTTTGTATACAATGAAATAGTATATGTGTAACAGGTTGCTGCTTGGAAAGACAAGGATGGGGATTGGTATGAAACAGG	TTTATATGTAAGAGAGTTTGTATACAATGAAATAGTATATGTGTAACAGGTTGCTGCTTGGAAAGACTAGGATGGGGGTTGGTATGAAACAGG	93	8	Sub	N/A
120	TTTATATGTAAGAGAGTTTGTATACAATGAAATAGTATATGTGTAACAGGTTGCTGCTTGGAAAGACAAGGATGGGGATTGGTATGAAACAGG	TTTATATGTAAGAGAGTTTGTATACAATGAAATAGTATATGTGTAACAGGTTGCTGCTTGGAAAGACGAGGATGGGGATTGCTATGAAACAGG	93	8	Sub	N/A
121	TTTATATGTAAGAGAGTTTGTATACAATGAAATAGTATATGTGTAACAGGTTGCTGCTTGGAAAGACAAGGATGGGGATTGGTATGAAACAGG	TTTATATGTAAGAGAGTTTGTATACAATGAAATAGTATATGTGTAACTGGTTGCTGCTTGGAAAGACAAGGATGGGGATTGGTATGAAACATG	93	8	Sub	N/A
122	TTTATATGTAAGAGAGTTTGTATACAATGAAATAGTATATGTGTAACAGGTTGCTGCTTGGAAAGACAAGGATGGGGATTGGTATGAAACAGG	TTTATATGTAAGAGAGTTTGTATACCATGAAATAGTATATGTGTAACAGGTTGCTGCTTGGAAAGACAAGGATGGGGATTGGTATGACACAGG	93	8	Sub	N/A
123	TTTATATGTAAGAGAGTTTGTATACAATGAAATAGTATATGTGTAACAGGTTGCTGCTTGGAAAGACAAGGATGGGGATTGGTATGAAACAGG	TTTATATGTAAGAGAGTTTGTATACAATGAAATAGTATATGTGTAACAGGTTGTTGCTTGGAAAGACGAGGATGGGGATTGGTATGAAACAGG	93	8	Sub	N/A
124	TTTATATGTAAGAGAGTTTGTATACAATGAAATAGTATATGTGTAACAGGTTGCTGCTTGGAAAGACAAGGATGGGGATTGGTATGAAACAGG	TTTATATGTAAGAGAGTTTGTATACAATGAAATAGTATATGTGTAACAGGTTGCCGCTTGGAAAGACAAGGATGGGGATTAGTATGAAACAGG	93	8	Sub	N/A
125	TTTATATGTAAGAGAGTTTGTATACAATGAAATAGTATATGTGTAACAGGTTGCTGCTTGGAAAGACAAGGATGGGGATTGGTATGAAACAGG	TTTATATGTAAGAGAGTTTGTATACAATGAAATAGTATATGTGTAACCGGTTGCTGCTTGGAAAGAAAAGGATGGGGATTAGTATGAAACAGG	93	8	Sub	N/A
126	TTTATATGTAAGAGAGTTTGTATACAATGAAATAGTATATGTGTAACAGGTTGCTGCTTGGAAAGACAAGGATGGGGATTGGTATGAAACAGG	TTTATATGTAAGAGAGTTTGTATACAATGAAATAGTATATGTGTAACAGGTTGCTGCTTGGACATAC----ATGGGGATTGGTATGAAACAGG	89	8	del	N/A
127	TTTATATGTAAGAGAGTTTGTATACAATGAAATAGTATATGTGTAACAGGTTGCTGCTTGGAAAGACAAGGATGGGGATTGGTATGAAACAGG	TTTATATGTAAGAGAGTTTGTATACAATGAAATAGTATATGTGTAACAGGTTGCAGCTTGGAAAGACAAGGATGGGGATTAGTATGAAACAGG	93	8	Sub	N/A
128	TTTATATGTAAGAGAGTTTGTATACAATGAAATAGTATATGTGTAACAGGTTGCTGCTTGGAAAGACAAGGATGGGGATTGGTATGAAACAGG	TTTATATGTAAGAGAGTTTGTATACAATGAAATAGTATATGTGTAACAGGTTGCTGCTGGGAAAGACAAGGATGGGGATTGGTATGAAAAAGG	93	8	Sub	N/A
129	TTTATATGTAAGAGAGTTTGTATACAATGAAATAGTATATGTGTAACAGGTTGCTGCTTGGAAAGACAAGGATGGGGATTGGTATGAAACAGG	TTTATATGTAAGAGAGTTTGTATACAATGAAATAGTATATGTTTAATAGGTTGCTGCTTGGAAAGACAAGGATGGGGATTGGTATGAAACAGG	93	8	Sub	N/A
130	TTTATATGTAAGAGAGTTTGTATACAATGAAATAGTATATGTGTAACAGGTTGCTGCTTGGAAAGACAAGGATGGGGATTGGTATGAAACAGG	TTTATATGTAAGAGAGTTTGTATATAATGGAATAGTATATGTGTAACAGGTTGCTGCTTGGAAAGACAAGGATGGGGATTGGTATGAAACAGG	93	8	Sub	N/A
131	TTTATATGTAAGAGAGTTTGTATACAATGAAATAGTATATGTGTAACAGGTTGCTGCTTGGAAAGACAAGGATGGGGATTGGTATGAAACAGG	TTTATATGTAAGAGAGTTTGTATACAATGAAATAGTATATGTGCAACAGGTTGCTGCTTGGAAAGAC----ATGGGGATTGGTATGAAACAGG	89	8	del	N/A
132	TTTATATGTAAGAGAGTTTGTATACAATGAAATAGTATATGTGTAACAGGTTGCTGCTTGGAAAGACAAGGATGGGGATTGGTATGAAACAGG	TTTATATGTAAGAGAGTTTGTATACAATGAAATAGTATATGTGTAACCGGTTTCTGCTTGGAAAGACAAGGATGGGGATTGGTATGAAACAGG	93	8	Sub	N/A
133	TTTATATGTAAGAGAGTTTGTATACAATGAAATAGTATATGTGTAACAGGTTGCTGCTTGGAAAGACAAGGATGGGGATTGGTATGAAACAGG	TTTATATGTAAGAGAGTTTGTATATAATGGAATAGTGTATGTGTAACGGGTTGCTGCTTGGAAAGACAAGGATGGGGATTGGTATGACACAGG	93	8	Sub	N/A
134	TTTATATGTAAGAGAGTTTGTATACAATGAAATAGTATATGTGTAACAGGTTGCTGCTTGGAAAGACAAGGATGGGGATTGGTATGAAACAGG	TTTATATGTAAGAGAGTTTGTATACAATGAAATAGTATATGTGTAACAGGTTGCTGCTTGGAAAGACAACGATGGGGATTTGTATGAAACAGG	93	8	Sub	N/A
135	TTTATATGTAAGAGAGTTTGTATACAATGAAATAGTATATGTGTAACAGGTTGCTGCTTGGAAAGACAAGGATGGGGATTGGTATGAAACAGG	TTTATATGTAAGAGAGTTTGTATACAATGAAATAGTATATGTGTAACAGGTTGCTGCTT-GAAAGACAAGGATGGGGATTGGTATGAAACAGG	92	8	del	N/A
136	TTTATATGTAAGAGAGTTTGTATACAATGAAATAGTATATGTGTAACAGGTTGCTGCTTGGAAAGACAAGGATGGGGATTGGTATGAAACAGG	TTTATATGTAAGAGAGTTTGTATACAATGAAATAGTATATGTGTAACCGGTTGCTGCTTGGAAAGACAAGGATGGGGATTGGGATGAAACAGG	93	8	Sub	N/A
137	TTTATATGTAAGAGAGTTTGTATACAATGAAATAGTATATGTGTAACAGGTTGCTGCTTGGAAAGACAAGGATGGGGATTGGTATGAAACAGG	TTTATATGTAAGAGAGTTTGTATACAATGAAATAGTATATGTGTAACAGGTTGCTGCTTGGAAAGATAAGGATGGGGATTGGTATGAAACATG	93	8	Sub	N/A
138	TTTATATGTAAGAGAGTTTGTATACAATGAAATAGTATATGTGTAACAGGTTGCTGCTTGGAAAGACAAGGATGGGGATTGGTATGAAACAGG	TTTATATGTAAGAGAGTTTGTATACAATGAAATAGTATATGTGTAACAGGTTGCTGCTTGGAAAGACCAGGATGGGGATTTGTATGAAACAGG	93	8	Sub	N/A
139	TTTATATGTAAGAGAGTTTGTATACAATGAAATAGTATATGTGTAACAGGTTGCTGCTTGGAAAGACAAGGATGGGGATTGGTATGAAACAGG	TTTATATGTAAGAGAGTTTGTATACAATGAAATAGTATATGTGTAACAGGTTTCTGCTTGGAAAGAAAAGGATGGGGATTGGTATGAAACAGG	93	8	Sub	N/A
140	TTTATATGTAAGAGAGTTTGTATACAATGAAATAGTATATGTGTAACAGGTTGCTGCTTGGAAAGACAAGGATGGGGATTGGTATGAAACAGG	TTTATATGTAAGAGAGTTTGTATACAATGAAATAGTATATGTGTAACAGGTGGCTGCTTGGAAAGAC----ATGGGGATTGGTATGAAACAGG	89	8	del	N/A
141	TTTATATGTAAGAGAGTTTGTATACAATGAAATAGTATATGTGTAACAGGTTGCTGCTTGGAAAGACAAGGATGGGGATTGGTATGAAACAGG	TTTATATGTAAGAGAGTTTGTATACAATGAAATAGTATATGTGTAACTGGTTGCGGCTTGGAAAGACAAGGATGGGGATTGGTATGAAACAGG	93	8	Sub	N/A
142	TTTATATGTAAGAGAGTTTGTATACAATGAAATAGTATATGTGTAACAGGTTGCTGCTTGGAAAGACAAGGATGGGGATTGGTATGAAACAGG	TTTATATGTAAGAGAGTTTGTATACAATGAAATAGTATATGTGTAATAGGTTGCTGCTTGGAAAGACAAGGAT-GGGATTGGTATGAAACAGG	92	8	del	N/A
143	TTTATATGTAAGAGAGTTTGTATACAATGAAATAGTATATGTGTAACAGGTTGCTGCTTGGAAAGACAAGGATGGGGATTGGTATGAAACAGG	TCTATATGTAAGAGAGTTTGTATACAATGAATTAGTATATGTGTAACAGGTTGCTGCTTGGAAAGACAAGGATGGGGATTGGTATGAAACAGG	93	8	Sub	N/A
144	TTTATATGTAAGAGAGTTTGTATACAATGAAATAGTATATGTGTAACAGGTTGCTGCTTGGAAAGACAAGGATGGGGATTGGTATGAAACAGG	TTTATATGTAAGAGAGTTTGTATACAATGAAATAGTATATGTGTAACAGGTTGCTGCTTGGAAAGAC----ATGGGGATTGGTATGAAACAAG	89	8	del	N/A
145	TTTATATGTAAGAGAGTTTGTATACAATGAAATAGTATATGTGTAACAGGTTGCTGCTTGGAAAGACAAGGATGGGGATTGGTATGAAACAGG	TTTATATGTAAGAGAGTTTGTATACAATGAAATAGTATATGTGTAATAGGTTGCTGCTTGGAAAGACAAGGATGAGGATTGGTATGAAACAGG	93	8	Sub	N/A
146	TTTATATGTAAGAGAGTTTGTATACAATGAAATAGTATATGTGTAACAGGTTGCTGCTTGGAAAGACAAGGATGGGGATTGGTATGAAACAGG	TTTATATGTAAGAGAGTTTGTATACAATGAAATAGTATATGTGTAATATGTTGCTGCTTGGAAAGACAAGGATGGGGATTGGTATGAAACAGG	93	8	Sub	N/A
147	TTTATATGTAAGAGAGTTTGTATACAATGAAATAGTATATGTGTAACAGGTTGCTGCTTGGAAAGACAAGGATGGGGATTGGTATGAAACAGG	TTTATATGTAAGAGAGTTTGTATACAATGAAATAGTATATGTGTAATAGGTTGCTGCTAGGAAAGACAAGGATGGGGATTGGTATGAAACAGG	93	8	Sub	N/A
148	TTTATATGTAAGAGAGTTTGTATACAATGAAATAGTATATGTGTAACAGGTTGCTGCTTGGAAAGACAAGGATGGGGATTGGTATGAAACAGG	TTTATATGTAAGAGAGTTTGTATACAATGAAATAGTATATGTGTAATAGGTTGCTGCTTGGAAAGACAAGGATGGTGATTGGTATGAAACAGG	93	8	Sub	N/A
149	TTTATATGTAAGAGAGTTTGTATACAATGAAATAGTATATGTGTAACAGGTTGCTGCTTGGAAAGACAAGGATGGGGATTGGTATGAAACAGG	TTTATATGTAAGAGAGTTTGTATACAATGAAATAGTATATGTGTAACAGGTTGATGCTTGGAAAGACAAGGATGGGGATTGGTAGGAAACAGG	93	8	Sub	N/A
150	TTTATATGTAAGAGAGTTTGTATACAATGAAATAGTATATGTGTAACAGGTTGCTGCTTGGAAAGACAAGGATGGGGATTGGTATGAAACAGG	TTTATATGTAAGAGAGTTTGTATACAATGAAATAGTATATGTGTAACAGGTTGCTGCTTGGAAAGAAAAGGATGGGGATTGGTATGAAACAAG	93	8	Sub	N/A
151	TTTATATGTAAGAGAGTTTGTATACAATGAAATAGTATATGTGTAACAGGTTGCTGCTTGGAAAGACAAGGATGGGGATTGGTATGAAACAGG	TTTATATGTAAGAGAGTTTGTATACAATGAACTAGTATATGTGTAACAGGTTGCTGCTTGGAAAGACAAGGATGGGGATTAGTATGAAACAGG	93	8	Sub	N/A
152	TTTATATGTAAGAGAGTTTGTATACAATGAAATAGTATATGTGTAACAGGTTGCTGCTTGGAAAGACAAGGATGGGGATTGGTATGAAACAGG	TTTATATGTAAGAGAGTTTGTATACAATGAAATAGTATATGTGTAACAGGTTGATGCTTGGAAAGAACAGGATGGGGATTAGTATGAAACAGG	93	8	Sub	N/A
153	TTTATATGTAAGAGAGTTTGTATACAATGAAATAGTATATGTGTAACAGGTTGCTGCTTGGAAAGACAAGGATGGGGATTGGTATGAAACAGG	TTTATATGTAAGAGAGTTTGTATACAATGAAATAGTATATGTATAATAGGTTGCTGCTTGGAAAGACAAGGATGGGGATTGGTATGAAACAGG	93	8	Sub	N/A
154	TTTATATGTAAGAGAGTTTGTATACAATGAAATAGTATATGTGTAACAGGTTGCTGCTTGGAAAGACAAGGATGGGGATTGGTATGAAACAGG	TTTATATGTAAGAGAGTTTGTATACAATGAAATAGTATATGTGTAACAGGTTGCTGCTTGGAAAGACGACGATGGGGATTTGTATGAAACAGG	93	8	Sub	N/A
155	TTTATATGTAAGAGAGTTTGTATACAATGAAATAGTATATGTGTAACAGGTTGCTGCTTGGAAAGACAAGGATGGGGATTGGTATGAAACAGG	TTTATATGTAAGAGAGTTTGTATACAATGAAATAGTATATGTGTAACAGGTTGCTGCTTGGAAAGACACGGATGGGGATTGCTATGAAACAGG	93	8	Sub	N/A
156	TTTATATGTAAGAGAGTTTGTATACAATGAAATAGTATATGTGTAACAGGTTGCTGCTTGGAAAGACAAGGATGGGGATTGGTATGAAACAGG	TTTATATGTAAGAGAGTTTGTATACAATGAAATAGTATATGTGTAATAGGTTGCTGCTTGGATAGACAAGGATGGGGATTGGTATGAAACAGG	93	8	Sub	N/A
157	TTTATATGTAAGAGAGTTTGTATACAATGAAATAGTATATGTGTAACAGGTTGCTGCTTGGAAAGACAAGGATGGGGATTGGTATGAAACAGG	TTTATATGTAAGAGAGTTTGTATACAATGAAATAGTATATGTGTAACAGGTTCCTGCTTGGAAAGACCAGGATGGGGATTGGTATGAAACAGG	93	8	Sub	N/A
158	TTTATATGTAAGAGAGTTTGTATACAATGAAATAGTATATGTGTAACAGGTTGCTGCTTGGAAAGACAAGGATGGGGATTGGTATGAAACAGG	TTTATATGTAAGAGAGTTTGTATACAATGAAATAGTATATGTGTAACCGGTTGCTGCTTGGAAAGAGAAGGATGGGGATTGGTATGAAACAGG	93	8	Sub	N/A
159	TTTATATGTAAGAGAGTTTGTATACAATGAAATAGTATATGTGTAACAGGTTGCTGCTTGGAAAGACAAGGATGGGGATTGGTATGAAACAGG	TTTATATGTAAGAGAGTTTGTATACAATGAAATAGTATATGTCTAACAGGTTGCTGCTTGGAAAGACAAGGATGGGGATTGCTATGAAACAGG	93	8	Sub	N/A
160	TTTATATGTAAGAGAGTTTGTATACAATGAAATAGTATATGTGTAACAGGTTGCTGCTTGGAAAGACAAGGATGGGGATTGGTATGAAACAGG	TTTATATGTAAGAGAGTTTGTATACAATGAAATAGTATATGTGTAACAGGTTGCTGCTTGGACAGACACGGATGGGGATTGGTATGAAACACG	93	8	Sub	N/A
161	TTTATATGTAAGAGAGTTTGTATACAATGAAATAGTATATGTGTAACAGGTTGCTGCTTGGAAAGACAAGGATGGGGATTGGTATGAAACAGG	TTTATATGTAAGAGAGTTTGTATACAATGAAATAGTATATGTGTAACAGGTTGCTGCTTGGCAAGACAAGGATGGGGATTAGTATGAAACAGG	93	8	Sub	N/A
162	TTTATATGTAAGAGAGTTTGTATACAATGAAATAGTATATGTGTAACAGGTTGCTGCTTGGAAAGACAAGGATGGGGATTGGTATGAAACAGG	TTTATATGTAAGAGAGTTTGTATACAATGAAATAGTATATGTGTAACAGGTTGCTGCTTGGAAAGACAATGATGGGGAGTGGTATGAAACAGG	93	8	Sub	N/A
163	TTTATATGTAAGAGAGTTTGTATACAATGAAATAGTATATGTGTAACAGGTTGCTGCTTGGAAAGACAAGGATGGGGATTGGTATGAAACAGG	TTTATATGTAAGAGAGTTTGTATACAATGAAATAGTATATGTGTAACAGGTTGCTGCTTGGAAAGACAAACATGGGGATTGGTATGAAACAGG	93	8	Sub	N/A
164	TTTATATGTAAGAGAGTTTGTATACAATGAAATAGTATATGTGTAACAGGTTGCTGCTTGGAAAGACAAGGATGGGGATTGGTATGAAACAGG	TTTATATGTAAGAGAGTTTGTATACAATGAAATAGTATATGTGTAACAGGTTGCTGCTTGGAAAGACAGGGATGGGGATTGGTATGAAACAAG	93	8	Sub	N/A
165	TTTATATGTAAGAGAGTTTGTATACAATGAAATAGTATATGTGTAACAGGTTGCTGCTTGGAAAGACAAGGATGGGGATTGGTATGAAACAGG	TTTATATGTAAGAGAGTTTGTATACAATGAAATAGTATATGTGTAACGGGTTGCTGCTTGGAAAGACAAGGATGGGGATTGGTATGAAACATG	93	8	Sub	N/A
166	TTTATATGTAAGAGAGTTTGTATACAATGAAATAGTATATGTGTAACAGGTTGCTGCTTGGAAAGACAAGGATGGGGATTGGTATGAAACAGG	TTTATATGTAAGAGAGTTTGTATACAATGAAATAGTATATGTGTAACAGGTTGCTGCTTGGAAACACAAGGATGGGGATTTGTATGAAACAGG	93	8	Sub	N/A
167	TTTATATGTAAGAGAGTTTGTATACAATGAAATAGTATATGTGTAACAGGTTGCTGCTTGGAAAGACAAGGATGGGGATTGGTATGAAACAGG	TTTATATGTAAGAGAGTTTGTATACAATGAAATAGTATATGTGTAACAGGTTGCTGCTTGGAAAGAC----ATGGGGATTGGTCTGAAACAGG	89	8	del	N/A
168	TTTATATGTAAGAGAGTTTGTATACAATGAAATAGTATATGTGTAACAGGTTGCTGCTTGGAAAGACAAGGATGGGGATTGGTATGAAACAGG	TTTATATGTAAGAGAGTTTGTATACAATGAAATAGTATATGTGTAATAGGTTGCTGCTTGGAAAGACAAGGATGGGGATTGGTTTGAAACAGG	93	8	Sub	N/A
169	TTTATATGTAAGAGAGTTTGTATACAATGAAATAGTATATGTGTAACAGGTTGCTGCTTGGAAAGACAAGGATGGGGATTGGTATGAAACAGG	TTTATATGTAAGAGAGTTTGTATACAATGAAATAGTATATGTGTAACAGGTTGCTGCTTGGTAAGAAAAGGATGGGGATTGGTATGAAACAGG	93	8	Sub	N/A
170	TTTATATGTAAGAGAGTTTGTATACAATGAAATAGTATATGTGTAACAGGTTGCTGCTTGGAAAGACAAGGATGGGGATTGGTATGAAACAGG	TTTATATGTAAGAGAGTTTGTATACAATGAAATAGTATATGTGTAACAGGTTGCTGCTTGGTAAGACAAGGATGGGGATTAGTATGAAACAGG	93	8	Sub	N/A
171	TTTATATGTAAGAGAGTTTGTATACAATGAAATAGTATATGTGTAACAGGTTGCTGCTTGGAAAGACAAGGATGGGGATTGGTATGAAACAGG	TTTATATGTAAGAGAGTTTGTATACAATGAAATAGTATATGTGTAACAGGTTGCAGCTTGGTAAGACAAGGATGGGGAATGGTATGAAACAGG	93	8	Sub	N/A
172	TTTATATGTAAGAGAGTTTGTATACAATGAAATAGTATATGTGTAACAGGTTGCTGCTTGGAAAGACAAGGATGGGGATTGGTATGAAACAGG	TTTATATGTAAGAGAGTTTGTATACAATGAAATAGTATATGTGTAACGGGTTGCTGCTTGGAAACACAAGGATGGGGATTGGTATGAAACAGG	93	8	Sub	N/A
173	TTTATATGTAAGAGAGTTTGTATACAATGAAATAGTATATGTGTAACAGGTTGCTGCTTGGAAAGACAAGGATGGGGATTGGTATGAAACAGG	TTTATATGTAAGAGAGTTTGTATACAATGAAATAGTATATGTGTAATAGGTTGATGCTTGGAAAGACAAGGGTGGGGATTGGTATGAAACAGG	93	8	Sub	N/A
174	TTTATATGTAAGAGAGTTTGTATACAATGAAATAGTATATGTGTAACAGGTTGCTGCTTGGAAAGACAAGGATGGGGATTGGTATGAAACAGG	TTTATATGTAAGAGAGTTTGTATACAATGAAATAGTATATGTGTAACAGGTTGCTGCTTGGAAAGACCAGGATGGGGATTGGTATGAAACAGT	93	7	Sub	N/A
175	TTTATATGTAAGAGAGTTTGTATACAATGAAATAGTATATGTGTAACAGGTTGCTGCTTGGAAAGACAAGGATGGGGATTGGTATGAAACAGG	TTTATATGTAAGAGAGTTTGTATACAATGAAATAGTATATGTGTAACAGGTTGCTGCTTGGAAAGAAAAGGATGGGGATTGGTATGAAACAGA	93	7	Sub	N/A
176	TTTATATGTAAGAGAGTTTGTATACAATGAAATAGTATATGTGTAACAGGTTGCTGCTTGGAAAGACAAGGATGGGGATTGGTATGAAACAGG	TTTATATGTAAGAGAGTTTGTATACAATGAAATAGTATATGTGTAGCAGGTTGCTGCTTGGAAAGGCAAGGATGGGGATTGGTATGAAACAGG	93	7	Sub	N/A
177	TTTATATGTAAGAGAGTTTGTATACAATGAAATAGTATATGTGTAACAGGTTGCTGCTTGGAAAGACAAGGATGGGGATTGGTATGAAACAGG	TTTATATGTAAGAGAGTTTGTATACAATGAAATAGTATATGTCTAACAGGTTGCTGCTTGGAAAGACAAGGATGGGGATTGGTATGAAACACG	93	7	Sub	N/A
178	TTTATATGTAAGAGAGTTTGTATACAATGAAATAGTATATGTGTAACAGGTTGCTGCTTGGAAAGACAAGGATGGGGATTGGTATGAAACAGG	TTTATATGTAAGAGAGTTTGTATACAATGAAATAGTATATGTGTAATAGGTTGCTGCTTGGAAAGAAAAGGATGGGGATTGGTATGACACAGG	93	7	Sub	N/A
179	TTTATATGTAAGAGAGTTTGTATACAATGAAATAGTATATGTGTAACAGGTTGCTGCTTGGAAAGACAAGGATGGGGATTGGTATGAAACAGG	TTTATATGTAAGAGAGTTTGTATACAATGAAATAGTATATGTGTAACAGGTTGCTGCTTGGAAAGAAAAGGATGGGGGTTAGTATGAAACAGG	93	7	Sub	N/A
180	TTTATATGTAAGAGAGTTTGTATACAATGAAATAGTATATGTGTAACAGGTTGCTGCTTGGAAAGACAAGGATGGGGATTGGTATGAAACAGG	TTTATATGTAAGAGAGTTTGTATACAATGAAATCGTATATGTGTAATAGGTTGCTGCTTGGAAAGACAAGGATGGGGATTGGTATGAAACAGG	93	7	Sub	N/A
181	TTTATATGTAAGAGAGTTTGTATACAATGAAATAGTATATGTGTAACAGGTTGCTGCTTGGAAAGACAAGGATGGGGATTGGTATGAAACAGG	TTTATATGTAAGAGAGTTTGTATACAATGAAATAGTATATGTGTAATAGGTTGCTGCTTGGAAAGAC----ATGGGGATTCGTATGAAACAGG	89	7	del	N/A
182	TTTATATGTAAGAGAGTTTGTATACAATGAAATAGTATATGTGTAACAGGTTGCTGCTTGGAAAGACAAGGATGGGGATTGGTATGAAACAGG	TTTATATGTAAGAGAGTTTGTATACAATGAAATAGTATATGTGTAACAGGTTGATGCTTGGAAAGACAAGGATGGGGATTGGTATGGAACAGG	93	7	Sub	N/A
183	TTTATATGTAAGAGAGTTTGTATACAATGAAATAGTATATGTGTAACAGGTTGCTGCTTGGAAAGACAAGGATGGGGATTGGTATGAAACAGG	TTTATATGTAAGAGAGTTTGTATACAATGAAATAGTATATGTGTAACAGGTTGCTGCTTGGAAAGACAAGGATGCGGATTGGTATGAAACAGG	93	7	Sub	N/A
184	TTTATATGTAAGAGAGTTTGTATACAATGAAATAGTATATGTGTAACAGGTTGCTGCTTGGAAAGACAAGGATGGGGATTGGTATGAAACAGG	TTTATATGTAAGAGAGTTTGTATACAATGAAATAGTATATGTGTAACAGGTTTCTGCTTGGAAAGACAAGGATGGGGATTGGTATGCAACAGG	93	7	Sub	N/A
185	TTTATATGTAAGAGAGTTTGTATACAATGAAATAGTATATGTGTAACAGGTTGCTGCTTGGAAAGACAAGGATGGGGATTGGTATGAAACAGG	TTTATATGTAAGAGAGTTTGTATACAATGAAATAGTATATGTGTAACCGGTTGCTGCTTGGAAAGACACGGATGGGGATTGATATGAAACAGG	93	7	Sub	N/A
186	TTTATATGTAAGAGAGTTTGTATACAATGAAATAGTATATGTGTAACAGGTTGCTGCTTGGAAAGACAAGGATGGGGATTGGTATGAAACAGG	TTTATATGTAAGAGAGTTTGTATACAATGAAATAGTATATGTGTAACAGGTTGCTGCTTGGAAAGAC----ATGGGGATTGGTATAAAACAGG	89	7	del	N/A
187	TTTATATGTAAGAGAGTTTGTATACAATGAAATAGTATATGTGTAACAGGTTGCTGCTTGGAAAGACAAGGATGGGGATTGGTATGAAACAGG	TTTATATGTAAGAGAGTTTGTATACAATGAAATAGTATATGTGTAACAGGTTGCTGCGTGGAAAGACAAGGATGGGGATTGGTATGGAACAGG	93	7	Sub	N/A
188	TTTATATGTAAGAGAGTTTGTATACAATGAAATAGTATATGTGTAACAGGTTGCTGCTTGGAAAGACAAGGATGGGGATTGGTATGAAACAGG	TTTATATGTAAGAGAGTTTGTATACAATGAAATAGTATATGTGTAATAGGTTGATGCTTGGAAAGAAAAGGATGGGGATTAGTATGAAACAGG	93	7	Sub	N/A
189	TTTATATGTAAGAGAGTTTGTATACAATGAAATAGTATATGTGTAACAGGTTGCTGCTTGGAAAGACAAGGATGGGGATTGGTATGAAACAGG	TTTATATGTAAGAGAGTTTGTATACAATGAAATAGTATATGTGTAACAGGTTGCTGCTCGGAAAGACAAGGATGGGGATTAGTATGAAACAGG	93	7	Sub	N/A
190	TTTATATGTAAGAGAGTTTGTATACAATGAAATAGTATATGTGTAACAGGTTGCTGCTTGGAAAGACAAGGATGGGGATTGGTATGAAACAGG	TTTATATGTAAGAGAGTTTGTATACAATGAAATAGTATATGTGTAACAGGTTGCTGCTTGGAAAGACCGGGATGGGGATTGGTATGAAACAGG	93	7	Sub	N/A
191	TTTATATGTAAGAGAGTTTGTATACAATGAAATAGTATATGTGTAACAGGTTGCTGCTTGGAAAGACAAGGATGGGGATTGGTATGAAACAGG	TTTATATGTAAGAGAGTTTGTATACAATGAAATAGTATATGTGTAACAGGTTGCTGCTTGGAAAGAGACGGATGGGGATTGGTATGAAACAGG	93	7	Sub	N/A
192	TTTATATGTAAGAGAGTTTGTATACAATGAAATAGTATATGTGTAACAGGTTGCTGCTTGGAAAGACAAGGATGGGGATTGGTATGAAACAGG	TTTATATGTAAGAGAGTTTGTATACAATGAAATAGTATATGTGTAACGGGTTGCTGCTTGGAAAGACAAGGATGGGGGTTGGTATGAAACAGG	93	7	Sub	N/A
193	TTTATATGTAAGAGAGTTTGTATACAATGAAATAGTATATGTGTAACAGGTTGCTGCTTGGAAAGACAAGGATGGGGATTGGTATGAAACAGG	TTTATATGTAAAAGAGTTTGTATACAATGAAATAGTATATGTGTAATAGGTTGCTGCTTGGAAAGACAAGGATGGGGATTGGTATGAAACAGG	93	7	Sub	N/A
194	TTTATATGTAAGAGAGTTTGTATACAATGAAATAGTATATGTGTAACAGGTTGCTGCTTGGAAAGACAAGGATGGGGATTGGTATGAAACAGG	TTTATATGTAAGAGAGTTTGTATACAATGAAATAGTATATGTGTAACGGGTTGCTGCTTGGAAAGACAAGGATGGGGATTGGTATGAGACAGG	93	7	Sub	N/A
195	TTTATATGTAAGAGAGTTTGTATACAATGAAATAGTATATGTGTAACAGGTTGCTGCTTGGAAAGACAAGGATGGGGATTGGTATGAAACAGG	TTTATATGTAAGAGAGTTTGTATACAATGAAATAGTATATGTGTAACAGGTTGCTGCTTGGAAAGAGAAGGATGGGGATTGGTATGAAACAAG	93	7	Sub	N/A
196	TTTATATGTAAGAGAGTTTGTATACAATGAAATAGTATATGTGTAACAGGTTGCTGCTTGGAAAGACAAGGAT----------------GGGGATTGGTATGAAACAGG	TTTATATGTAAGAGAGTTTGTATACAATGAAATAGTATATGTGTAACAGGTTGCTGCTTGGAAAGACAAGGATGGGGATTGGTATGAAAGGGGATTGGTATGAAACAGG	109	7	Ins	N/A
197	TTTATATGTAAGAGAGTTTGTATACAATGAAATAGTATATGTGTAACAGGTTGCTGCTTGGAAAGACAAGGATGGGGATTGGTATGAAACAGG	TTTATATGTAAGAAAGTTTGTATACAATGAAATAGTATATGTGTAATAGGTTGCTGCTTGGAAAGACAAGGATGGGGATTGGTATGAAACAGG	93	7	Sub	N/A
198	TTTATATGTAAGAGAGTTTGTATACAATGAAATAGTATATGTGTAACAGGTTGCTGCTTGGAAAGACAAGGATGGGGATTGGTATGAAACAGG	TTTATATGTAAGAGAGTTTGTATACCATGAAATAGTATATGTGTAACAGGTTGATGCTTGGAAAGACAAGGATGGGGATTGGTATGAAACAGG	93	7	Sub	N/A
199	TTTATATGTAAGAGAGTTTGTATACAATGAAATAGTATATGTGTAACAGGTTGCTGCTTGGAAAGACAAGGATGGGGATTGGTATGAAACAGG	TTTATATGTAAGAGAGTTTGTATACAATGAAATAGTATATGTGTAATAGGTTGCTGCTTGGAAAGACAAGGATAGGGATTGGTATGAAACAGG	93	7	Sub	N/A
200	TTTATATGTAAGAGAGTTTGTATACAATGAAATAGTATATGTGTAACAGGTTGCTGCTTGGAAAGACAAGGATGGGGATTGGTATGAAACAGG	TTTATATGTAAGAGAGTTTGTATACAATGAAATAGTATATGTGTAATAGGTTGCGGCTTGGAAAGAAAAGGATGGGGATTGGTATGAAACAGG	93	7	Sub	N/A
201	TTTATATGTAAGAGAGTTTGTATACAATGAAATAGTATATGTGTAACAGGTTGCTGCTTGGAAAGACAAGGATGGGGATTGGTATGAAACAGG	TTTATATGTAAGAGAGTTTGTATACAATGAAATAGTATATGTGTAACAGGTTACTGCTTGGAAAGACAAGGATGGGGATTGGTATGAAACAGA	93	7	Sub	N/A
202	TTTATATGTAAGAGAGTTTGTATACAATGAAATAGTATATGTGTAACAGGTTGCTGCTTGGAAAGACAAGGATGGGGATTGGTATGAAACAGG	TTTATATGTAAGAGAGTTTGTATACAATGAAATAGTATATGTGTAACAGGTTGCTGCTTGGAAAGACACGGATGGGGATTGGTATGAAACAGC	93	7	Sub	N/A
203	TTTATATGTAAGAGAGTTTGTATACAATGAAATAGTATATGTGTAACAGGTTGCTGCTTGGAAAGACAAGGATGGGGATTGGTATGAAACAGG	TTTATATGTAAGAGAGTTTGTATACAATGAAATAGTATATGTGTAACAGGTTGCTGCTTGGAAAGACAAAAATGGGGATTGGTATGAAACAGG	93	7	Sub	N/A
204	TTTATATGTAAGAGAGTTTGTATACAATGAAATAGTATATGTGTAACAGGTTGCTGCTTGGAAAGACAAGGATGGGGATTGGTATGAAACAGG	TTTATATGTAAGAGAGTTTGTATACAATGAAATAGTATATGTGTAACTGGTTGCGGCTTGGAAAGATTTGGATGGGGATTGGTATGAAACAGG	93	7	Sub	N/A
205	TTTATATGTAAGAGAGTTTGTATACAATGAAATAGTATATGTGTAACAGGTTGCTGCTTGGAAAGACAAGGATGGGGATTGGTATGAAACAGG	TTTATATGTAAGAGAGTTTGTATACAATGAAATAGTATATGTGTAACAGGTTACTGCTTGGAAAGACAAGGATGGGGATTAGTATGAAACAGG	93	7	Sub	N/A
206	TTTATATGTAAGAGAGTTTGTATACAATGAAATAGTATATGTGTAACAGGTTGCTGCTTGGAAAGACAAGGATGGGGATTGGTATGAAACAGG	TTTATATGTAAGAGAGTTTGTATACAATGAAATAGTATATGTGTAACAGGTTGCTGCTTGGAAAGATAAGGATGGGGATTGGTATGAAACAGC	93	7	Sub	N/A
207	TTTATATGTAAGAGAGTTTGTATACAATGAAATAGTATATGTGTAACAGGTTGCTGCTTGGAAAGACAAGGATGGGGATTGGTATGAAACAGG	TTTATATGTAAGAGAGTTTGTATACAATGAAATAGTATATGTGTAACAGGTCGCTGCTTGGAAAGACAAGGATGGGGATTAGTATGAAACAGG	93	7	Sub	N/A
208	TTTATATGTAAGAGAGTTTGTATACAATGAAATAGTATATGTGTAACAGGTTGCTGCTTGGAAAGACAAGGATGGGGATTGGTATGAAACAGG	TTTATATGTAAGAGAGTTTGTATACAATGAAATAGTATATGTGTAACAGGTTGCTACTTGGAAAGAC----ATGGGGATTGGTATGAAACAGG	89	7	del	N/A
209	TTTATATGTAAGAGAGTTTGTATACAATGAAATAGTATATGTGTAACAGGTTGCTGCTTGGAAAGACAAGGATGGGGATTGGTATGAAACAGG	TTTATATGTAAGAGAGTTTGTATACAATGAAATAGTATATGTGTAACGGGTTGCTGCTTGGAAGGACAAGGATGGGGATTGGTATGAAACAGG	93	7	Sub	N/A
210	TTTATATGTAAGAGAGTTTGTATACAATGAAATAGTATATGTGTAACAGGTTGCTGCTTGGAAAGACAAGGATGGGGATTGGTATGAAACAGG	TTTATATGTAAGAGAGTTTGTATACAATGAAATAGTATATGTGAAACAGGTTGCTGCTTGGGAAGACAAGGATGGGGATTGGTATGAAACAGG	93	7	Sub	N/A
211	TTTATATGTAAGAGAGTTTGTATACAATGAAATAGTATATGTGTAACAGGTTGCTGCTTGGAAAGACAAGGATGGGGATTGGTATGAAACAGG	TTTATATGTAAGAGAGTTTGTATACAATGAAATAGTATATGTGTAATAGGTTGATGCTTGGAAAGACAAGGATGGGGATTAGTATGAAACAGG	93	7	Sub	N/A
212	TTTATATGTAAGAGAGTTTGTATACAATGAAATAGTATATGTGTAACAGGTTGCTGCTTGGAAAGACAAGGATGGGGATTGGTATGAAACAGG	TTTATATGTAAGAGAGTTTGTATACAATGAAATAGTATATGTGTAACAGGTTGCTGCTCGGAAAGACGAGGATGGGGATTGGTATGAAACAGG	93	7	Sub	N/A
213	TTTATATGTAAGAGAGTTTGTATACAATGAAATAGTATATGTGTAACAGGTTGCTGCTTGGAAAGACAAGGATGGGGATTGGTATGAAACAGG	TTTATATGTAAGAGAGTTTGTATACAATGAAACAGTGTATGTGTAACGGGTTGCTGCTTGGAAAGACAAGGATGGGGATTGGTATGAAACAGG	93	7	Sub	N/A
214	TTTATATGTAAGAGAGTTTGTATACAATGAAATAGTATATGTGTAACAGGTTGCTGCTTGGAAAGACAAGGATGGGGATTGGTATGAAACAGG	TTTATATGTAAGAGAGTTTGTATACAATGAAATAGTATATGTGTAATAGGGTGCTGCTGGGAAAGACAAGGATGGGGATTGGTATGAAACAGG	93	7	Sub	N/A
215	TTTATATGTAAGAGAGTTTGTATACAATGAAATAGTATATGTGTAACAGGTTGCTGCTTGGAAAGACAAGGATGGGGATTGGTATGAAACAGG	TTTATATGTAAGAGAGTTTGTATACAATGAACTAGTATATGTGTAACAGGTTGCTGCTTGGAAAGACAAGGATGGGGATTGGTATGAAACACG	93	7	Sub	N/A
216	TTTATATGTAAGAGAGTTTGTATACAATGAAATAGTATATGTGTAACAGGTTGCTGCTTGGAAAGACAAGGATGGGGATTGGTATGAAACAGG	TTTATATGTAAGAGAGTTTGTATACAATGAAATAATATATGTGTAATAGGTTGCTGCTTGGAAAGACAAGGATGGGGATTGGTATGAAACAGG	93	7	Sub	N/A
217	TTTATATGTAAGAGAGTTTGTATACAATGAAATAGTATATGTGTAACAGGTTGCTGCTTGGAAAGACAAGGATGGGGATTGGTATGAAACAGG	TTTATATGTAAGAGAGTTTGTATACAATGAAATAGTATATGTGTAATAGGTTGCTGCTTGGAAAGACGAGGATGGGGATTGGTATGAGACAGG	93	7	Sub	N/A
218	TTTATATGTAAGAGAGTTTGTATACAATGAAATAGTATATGTGTAACAGGTTGCTGCTTGGAAAGACAAGGATGGGGATTGGTATGAAACAGG	TTTATATGTAAGAGAGTTTGTATACAATGAAATAGTATATGTGTAACAGGTTGTTGCTTGGAAAGAC----ATGGGGATTGGTATGAAACAGG	89	7	del	N/A
219	TTTATATGTAAGAGAGTTTGTATACAATGAAATAGTATATGTGTAACAGGTTGCTGCTTGGAAAGACAAGGAT------------------GGGGATTGGTATGAAACAGG	TTTATATGTAAGAGAGTTTGTATACAATGAAATAGTATATGTGTAACAGGTTGCTGCTTGGAAAGACAAGGATGGGGAGTGGTATGAAACAGGGGATTGGTATGAAACAGG	111	7	Ins	N/A
220	TTTATATGTAAGAGAGTTTGTATACAATGAAATAGTATATGTGTAACAGGTTGCTGCTTGGAAAGACAAGGATGGGGATTGGTATGAAACAGG	TTTATATGTAAGAGAGTTTGTATACAATGAAATAGTATATGTGTAATAGGTTGCTGCTTGGAAAGACCAGGATGGGGATTCGTATGAAACAGG	93	7	Sub	N/A
221	TTTATATGTAAGAGAGTTTGTATACAATGAAATAGTATATGTGTAACAGGTTGCTGCTTGGAAAGACAAGGATGGGGATTGGTATGAAACAGG	TTTATATGTAAGAGAGTTTGTATACAATGAAATAGTATATGTGTAACAGGTTGCTGCTTGGAAAGACAAGGATGGGGTTTGGTATGAAACAGA	93	7	Sub	N/A
222	TTTATATGTAAGAGAGTTTGTATACAATGAAATAGTATATGTGTAACAGGTTGCTGCTTGGAAAGACAAGGATGGGGATTGGTATGAAACAGG	TTTATATGTAAGAGAGTTTGTATACAATGAAATAGTATATGTGTAACAGGTTGATGCTTGGAAAGACAAGGATGGGGATTTGTATGAAACAGG	93	7	Sub	N/A
223	TTTATATGTAAGAGAGTTTGTATACAATGAAATAGTATATGTGTAACAGGTTGCTGCTTGGAAAGACAAGGATGGGGATTGGTATGAAACAGG	TGTATATGTAAGAGAGTTTGTATACAATGAAATAGTATATGTGTAATAGGTTGCTGCTTGGAAAGACAAGGATGGGGATTGGTATGAAACAGG	93	7	Sub	N/A
224	TTTATATGTAAGAGAGTTTGTATACAATGAAATAGTATATGTGTAACAGGTTGCTGCTTGGAAAGACAAGGATGGGGATTGGTATGAAACAGG	TTTATATGTAAGAGAGTTTGTATACAATGAAATAGTATATGTGTAACAGGCTGCTGCTTGGAAAGACGAGGATGGGGATTGGTATGAAACAGG	93	7	Sub	N/A
225	TTTATATGTAAGAGAGTTTGTATACAATGAAATAGTATATGTGTAACAGGTTGCTGCTTGGAAAGACAAGGATGGGGATTGGTATGAAACAGG	TTTATATGTAAGAGAGTTTGTATACAATGAAATAGTATATGTGTAACAGGTTGCTGCTTGGAAAGACAAGGATGGGGGTTGGTATGACACAGG	93	7	Sub	N/A
226	TTTATATGTAAGAGAGTTTGTATACAATGAAATAGTATATGTGTAACAGGTTGCTGCTTGGAAAGACAAGGATGGGGATTGGTATGAAACAGG	TTTATATGTAAGAGAGTTTGGATACAATGAAATAGTATATGTGTAACAGGTTGCTGCTTGGAAAGACAAGGATGGGGATTGGTATGAAACAGG	93	7	Sub	N/A
227	TTTATATGTAAGAGAGTTTGTATACAATGAAATAGTATATGTGTAACAGGTTGCTGCTTGGAAAGACAAGGATGGGGATTGGTATGAAACAGG	TTTATATGTAAGAGAGTTTGTATACAATGAAATAGTATATGTGTAACAGGTTGCTGCTTGGAAAGACAAGGAGGGGGATGGGTATGAAACAGG	93	7	Sub	N/A
228	TTTATATGTAAGAGAGTTTGTATACAATGAAATAGTATATGTGTAACAGGTTGCTGCTTGGAAAGACAAGGATGGGGATTGGTATGAAACAGG	TTTATATGTAAGAGAGTTTGTATACAATGAAATAGTATATGTGTAACAGGTTGATGCTTGGAAAGACAAGGATGGGGATTGGTATGAAACACG	93	7	Sub	N/A
229	TTTATATGTAAGAGAGTTTGTATACAATGAAATAGTATATGTGTAACAGGTTGCTGCTTGGAAAGACAAGGATGGGGATTGGTATGAAACAGG	TTTATATGTAAGAGAGTTTGTATACAATGAAATAGTATATGTGTAACAGGTTGCTGCTTGGAAAGAACGGGATGGGGATTAGTATGAAACAGG	93	7	Sub	N/A
230	TTTATATGTAAGAGAGTTTGTATACAATGAAATAGTATATGTGTAACAGGTTGCTGCTTGGAAAGACAAGGATGGGGATTGGTATGAAACAGG	TTTATATGTAAGAGAGTTTGTATACAATGAAATAGTATATGTGTAACAGGTTGCTACTTGGAAAGAAAAGGATGGGGATTGGTATGAAACAGG	93	7	Sub	N/A
231	TTTATATGTAAGAGAGTTTGTATACAATGAAATAGTATATGTGTAACAGGTTGCTGCTTGGAAAGACAAGGATGGGGATTGGTATGAAACAGG	TTTATATGTAAGAGAGTTTGTATACAATGAAATAGTATATGTGTAACAGGTTGCTGCTTGGAAAGACAGGGATGGGGATTGGTATGAAACATG	93	7	Sub	N/A
232	TTTATATGTAAGAGAGTTTGTATACAATGAAATAGTATATGTGTAACAGGTTGCTGCTTGGAAAGACAAGGATGGGGATTGGTATGAAACAGG	TTTATATGTAAGAGAGTTTGTATACAATGAAATAGTATATGTGTAACTGGTTGCTGCTTGGAAAGACAAGGATGGGGGTTGGTATGAAACAGG	93	7	Sub	N/A
233	TTTATATGTAAGAGAGTTTGTATACAATGAAATAGTATATGTGTAACAGGTTGCTGCTTGGAAAGACAAGGATGGGGATTGGTATGAAACAGG	TTTATATGTAAGAGAGTTTGTATACAATGAAGTAGTATATGTGTAACAGGTTGCTGCTTGGAAAGACAAGGATGGGGATTAGTATGAAACAGG	93	7	Sub	N/A
234	TTTATATGTAAGAGAGTTTGTATACAATGAAATAGTATATGTGTAACAGGTTGCTGCTTGGAAAGACAAGGATGGGGATTGGTATGAAACAGG	TTTATATGTAAGAGAGTTTGTATACAATGAAATAGTATATGTGTAATTGGTTGCTGCTTGGAAAGACAAGGATGGGGATTCGTATGAAACAGG	93	7	Sub	N/A
235	TTTATATGTAAGAGAGTTTGTATACAATGAAATAGTATATGTGTAACAGGTTGCTGCTTGGAAAGACAAGGATGGGGATTGGTATGAAACAGG	TTTATATGTAAGAGAGTTTGTATACAATGAAATAGTATATGTGTAACAGGTTGCTGCTTGGAAAGACAAGGATGGGGGTTGGTATGAGACAGG	93	7	Sub	N/A
236	TTTATATGTAAGAGAGTTTGTATACAATGAAATAGTATATGTGTAACAGGTTGCTGCTTGGAAAGACAAGGATGGGGATTGGTATGAAACAGG	TTTATATGTAAGAGAGTTTGTATACAATGAAATAGTATATGTGTAACAGGTTGCTGCGGGGAAAGACAAGGATGGGGATTGGTATGAAACAGG	93	7	Sub	N/A
237	TTTATATGTAAGAGAGTTTGTATACAATGAAATAGTATATGTGTAACAGGTTGCTGCTTGGAAAGACAAGGATGGGGATTGGTATGAAACAGG	TTTATATGTAAGAGAGTTTGTATACAATGAAATAGTATATGTGTAACAGGTTGCTGCTTGGAAAGACAGGGATGGGGATTCGTATGAAACAGG	93	7	Sub	N/A
238	TTTATATGTAAGAGAGTTTGTATACAATGAAATAGTATATGTGTAACAGGTTGCTGCTTGGAAAGACAAGGATGGGGATTGGTATGAAACAGG	TTTATATGTAAGAGAGTTTGTATACAATGAAATAGTATATGTGTAACGGGTTGCTGCTTGGAAAGACAAGGATGGGGATTGGTATGAAACACG	93	7	Sub	N/A
239	TTTATATGTAAGAGAGTTTGTATACAATGAAATAGTATATGTGTAACAGGTTGCTGCTTGGAAAGACAAGGATGGGGATTGGTATGAAACAGG	TTTATATGTAAGAGAGTTTGTATACAATGAAATAGTATATGTGTAACAGGTTGCTGCTTGGACAGACAAGGATGGGGATTGGTATGAAACACG	93	7	Sub	N/A
240	TTTATATGTAAGAGAGTTTGTATACAATGAAATAGTATATGTGTAACAGGTTGCTGCTTGGAAAGACAAGGATGGGGATTGGTATGAAACAGG	TTTATATGTAAGAGAGTTTGTATACAATGAAATAGTATATGTGTAACAGGTTGCTGCTTGGAAAGACAGGGATGGGGATTGGTATGAAACACG	93	7	Sub	N/A
241	TTTATATGTAAGAGAGTTTGTATACAATGAAATAGTATATGTGTAACAGGTTGCTGCTTGGAAAGACAAGGATGGGGATTGGTATGAAACAGG	TTTATATGTAAGAGAGTTTGTATACAATGAAATAGTATATGTGTAATAGGTTGCTGCTTGGAAAGACATGGATGGGGATTGGTATGAAACACG	93	7	Sub	N/A
242	TTTATATGTAAGAGAGTTTGTATACAATGAAATAGTATATGTGTAACAGGTTGCTGCTTGGAAAGACAAGGATGGGGATTGGTATGAAACAGG	TTTATATGTAAGAGAGTTTGTATACAATGAAATAGTATATGTGTAACAGGTTGCTACTTGGAAAGACAAGGATGGGGATTCGTATGAAACAGG	93	7	Sub	N/A
243	TTTATATGTAAGAGAGTTTGTATACAATGAAATAGTATATGTGTAACAGGTTGCTGCTTGGAAAGACAAGGATGGGGATTGGTATGAAACAGG	TTTATATGTAAGAGAGTTTGTATACAATGAAATAGTATATGTGTAACAGGTTGCAGCTTGGCAAGTCAAGGATGGGGATTGGTATGAAACAGG	93	7	Sub	N/A
244	TTTATATGTAAGAGAGTTTGTATACAATGAAATAGTATATGTGTAACAGGTTGCTGCTTGGAAAGACAAGGATGGGGATTGGTATGAAACAGG	TTTATATGTAAGAGAGTTTGTATACAATGAAATAGTATATGTGTAACAGGTTGCAGCTTGGTAAGCCAAGGATGGGGATTGGTATGAAACAGG	93	7	Sub	N/A
245	TTTATATGTAAGAGAGTTTGTATACAATGAAATAGTATATGTGTAACAGGTTGCTGCTTGGAAAGACAAGGATGGGGATTGGTATGAAACAGG	TTTATATGTAAGAGAGTTTGTATACAATGAAATAGTATATGTGTAACAGGTTGCGGCTTGGCAAGACAAGGATGGGGATTGGTATGAAACAGG	93	7	Sub	N/A
246	TTTATATGTAAGAGAGTTTGTATACAATGAAATAGTATATGTGTAACAGGTTGCTGCTTGGAAAGACAAGGATGGGGATTGGTATGAAACAGG	TTTATATGTAAGAGAGTTTGTATACAATGAAATAGTATATGTGTAACAGGTTGCTGCTTGGTAAGACAAGGATGGGGACTGGTATGAAACAGG	93	7	Sub	N/A
247	TTTATATGTAAGAGAGTTTGTATACAATGAAATAGTATATGTGTAACAGGTTGCTGCTTGGAAAGACAAGGATGGGGATTGGTATGAAACAGG	TTTATATGTAAGAGAGTTTGTATACAATGAAATAGTATATGTGTAACAGGTTGCAGCTTGGCAAGACAAGGATGGGGACTGGTATGAAACAGG	93	7	Sub	N/A
248	TTTATATGTAAGAGAGTTTGTATACAATGAAATAGTATATGTGTAACAGGTTGCTGCTTGGAAAGACAAGGATGGGGATTGGTATGAAACAGG	TTTATATGTAAGAGAGTTTGTATACAATGAAATAGTATATGTGTAACAGGTTGCCGCTTGGTAAGACAAGGATGGGGAATGGTATGAAACAGG	93	7	Sub	N/A
249	TTTATATGTAAGAGAGTTTGTATACAATGAAATAGTATATGTGTAACAGGTTGCTGCTTGGAAAGACAAGGATGGGGATTGGTATGAAACAGG	TTTATATGTAAGAGAGTTTGTATACAATGAAATAGTATATGTGTAACAGAGTGCTGCTTGGAAAGACAAGGATGGGGATTGGTATGAAACAGG	93	7	Sub	N/A
250	TTTATATGTAAGAGAGTTTGTATACAATGAAATAGTATATGTGTAACAGGTTGCTGCTTGGAAAGACAAGGATGGGGATTGGTATGAAACAGG	TTTATATGTAAGAGAGTTTGTATACAATGAAATAGTATATGTGTAACCGCGTGCTGCTTGGAAAGACAAGGATGGGGATTGGTATGAAACAGG	93	7	Sub	N/A
251	TTTATATGTAAGAGAGTTTGTATACAATGAAATAGTATATGTGTAACAGGTTGCTGCTTGGAAAGACAAGGATGGGGATTGGTATGAAACAGG	TTTATATGTAAGAGAGTTTGTATACAATGAAATAGTATATGTGTAACTGGCTGCTGCTTGGAAAGACAAGGATGGGGATTGGTATGAAACAGG	93	7	Sub	N/A
252	TTTATATGTAAGAGAGTTTGTATACAATGAAATAGTATATGTGTAACAGGTTGCTGCTTGGAAAGACAAGGATGGGGATTGGTATGAAACAGG	TTTATATGTAAGAGAGTTTGTATACAATGAAATAGTATATGTGTAACTGCCTGCTGCTTGGAAAGACAAGGATGGGGATTGGTATGAAACAGG	93	7	Sub	N/A
253	TTTATATGTAAGAGAGTTTGTATACAATGAAATAGTATATGTGTAACAGGTTGCTGCTTGGAAAGACAAGGATGGGGATTGGTATGAAACAGG	TTTATATGTAAGAGAGTTTGTATACAATGAAATAGTATATGTGTAATAGCGTGCTGCTTGGAAAGACAAGGATGGGGATTGGTATGAAACAGG	93	7	Sub	N/A
254	TTTATATGTAAGAGAGTTTGTATACAATGAAATAGTATATGTGTAACAGGTTGCTGCTTGGAAAGACAAGGATGGGGATTGGTATGAAACAGG	TTTATATGTAAGAGAGTTTGTATACAATGAAATAGTATATGTGTAACCGCCTGCTGCTTGGAAAGACAAGGATGGGGATTGGTATGAAACAGG	93	7	Sub	N/A
255	TTTATATGTAAGAGAGTTTGTATACAATGAAATAGTATATGTGTAACAGGTTGCTGCTTGGAAAGACAAGGATGGGGATTGGTATGAAACAGG	TTTATATGTAAGAGAGTTTGTATACAATGAAATAGTATATGTGTAACAGTATGCTGCTTGGAAAGACAAGGATGGGGATTGGTATGAAACAGG	93	7	Sub	N/A
256	TTTATATGTAAGAGAGTTTGTATACAATGAAATAGTATATGTGTAACAGGTTGCTGCTTGGAAAGACAAGGATGGGGATTGGTATGAAACAGG	TTTATATGTAAGAGAGTTTGTATACAATGAAATAGTATATGTGTAATAGCGTGCTGCTTGGAAAGACAAGGATGGGGATTGGCATGAAACAGG	93	7	Sub	N/A
257	TTTATATGTAAGAGAGTTTGTATACAATGAAATAGTATATGTGTAACAGGTTGCTGCTTGGAAAGACAAGGATGGGGATTGGTATGAAACAGG	TTTATATGTAAGAGAGTTTGTATACAATGAAATAGTATATGTGTAACAGAATGCTGCTTGGAAAGACAAGGATGGGGATTGGCATGAAACAGG	93	7	Sub	N/A
258	TTTATATGTAAGAGAGTTTGTATACAATGAAATAGTATATGTGTAACAGGTTGCTGCTTGGAAAGACAAGGATGGGGATTGGTATGAAACAGG	TTTATATGTAAGAGAGTTTGTATACAATGAAATAGTATATGTGTAACAGGTTGGTGCTTGGAAAGACAAGGTTGGGGATTGGTATGAAACAGG	93	7	Sub	N/A
259	TTTATATGTAAGAGAGTTTGTATACAATGAAATAGTATATGTGTAACAGGTTGCTGCTTGGAAAGACAAGGATGGGGATTGGTATGAAACAGG	TTTATATGTAAGAGAGTTTGTATACAATGAAATAGTATATGTGTAACAGGTTGCTGCTTGNAAAGACAAGGATGGGGATTGGTATGAAACAGG	93	7	Sub	N/A
260	TTTATATGTAAGAGAGTTTGTATACAATGAAATAGTATATGTGTAACAGGTTGCTGCTTGGAAAGACAAGGATGGGGATTGGTATGAAACAGG	TTTATATGTAAGAGAGTTTGTATACAATGAAATAGTATATGTGTAACAGGTTGCTGCTTGGAAAGACTCGGATGGGGATTGGTATGAAACAGG	93	6	Sub	N/A
261	TTTATATGTAAGAGAGTTTGTATACAATGAAATAGTATATGTGTAACAGGTTGCTGCTTGGAAAGACAAGGATGGGGATTGGTATGAAACAGG	TTTATATGTAAGAGAGTTTGTATACAATGAAATAGTATATGTGTAACAGGTTGCTGCTTGGAAAGACTAGGATGGGGATTGGTATGAAACAGC	93	6	Sub	N/A
262	TTTATATGTAAGAGAGTTTGTATACAATGAAATAGTATATGTGTAACAGGTTGCTGCTTGGAAAGACAAGGATGGGGATTGGTATGAAACAGG	TTTATATGTAAGAGAGTTTGTATACAATGAAATAGTATATGTGTAACAGGTTGATGCTTGGAAAGACAAGGATGGGGATTGGTATGAAACAGC	93	6	Sub	N/A
263	TTTATATGTAAGAGAGTTTGTATACAATGAAATAGTATATGTGTAACAGGTTGCTGCTTGGAAAGACAAGGATGGGGATTGGTATGAAACAGG	TTTATATGTAAGAGAGTTTGTATACAATGAAATAGTATATGTGTAACGGGTTGCTGCTTGGAAAGAGAAGGATGGGGGTTGGTATGAAACAGG	93	6	Sub	N/A
264	TTTATATGTAAGAGAGTTTGTATACAATGAAATAGTATATGTGTAACAGGTTGCTGCTTGGAAAGACAAGGATGGGGATTGGTATGAAACAGG	TTTATATGTAAGAGAGTTTGTATACAATGAAATAGTATAAGTGTAACAGGTTGCTGCTTGGAAAGACAAGGATGGGGATTGGTATGAAACAGG	93	6	Sub	N/A
265	TTTATATGTAAGAGAGTTTGTATACAATGAAATAGTATATGTGTAACAGGTTGCTGCTTGGAAAGACAAGGATGGGGATTGGTATGAAACAGG	TTTATATGTAAGAGAGTTTGTATACAATGAAATAGTATATGTGTAATCGGTTGCTGCTTGGAAAGACACGGATGGGGATTGGTATGAAACAGG	93	6	Sub	N/A
266	TTTATATGTAAGAGAGTTTGTATACAATGAAATAGTATATGTGTAACAGGTTGCTGCTTGGAAAGACAAGGATGGGGATTGGTATGAAACAGG	TTTATATGTAAGAGAGTTTGTATACAATGAAATAGTATATGTGTAACAGGTTGCTTCTTGGAAAGACAAGTATGGGGATTGGTATGAAACAGG	93	6	Sub	N/A
267	TTTATATGTAAGAGAGTTTGTATACAATGAAATAGTATATGTGTAACAGGTTGCTGCTTGGAAAGACAAGGAT-GGGGATTGGTATGAAACAGG	TTTATATGTAAGAGAGTTTGTATACAATGAAATAGTATATGTGTAACAGGTTGCTGCTTGGAAAGACAAGGATGGGGGATTGGTATGAAACAGG	94	6	Ins	N/A
268	TTTATATGTAAGAGAGTTTGTATACAATGAAATAGTATATGTGTAACAGGTTGCTGCTTGGAAAGACAAGGATGGGGATTGGTATGAAACAGG	TTTATATGTAAGAGAGTTTGTATACAATGAAATAGTATATGTGTAACAGGTTGCTGCTTGGAAAGAAAAGGATGGGGATTGATATGAAACAGG	93	6	Sub	N/A
269	TTTATATGTAAGAGAGTTTGTATACAATGAAATAGTATATGTGTAACAGGTTGCTGCTTGGAAAGACAAGGATGGGGATTGGTATGAAACAGG	TTTATATGTAAGAGAGTTTGTATACAATGAAATAGTATATGTCTAATAGGTTGCTGCTTGGAAAGACAAGGATGGGGATTGGTATGAAACAGG	93	6	Sub	N/A
270	TTTATATGTAAGAGAGTTTGTATACAATGAAATAGTATATGTGTAACAGGTTGCTGCTTGGAAAGACAAGGATGGGGATTGGTATGAAACAGG	TTTATATGTAAGAGAGTTTGTATACAATGAAATAGTATATGTGTAACAGGGTGATGCTTGGAAAGACAAGGATGGGGATTGGTATGAAACAGG	93	6	Sub	N/A
271	TTTATATGTAAGAGAGTTTGTATACAATGAAATAGTATATGTGTAACAGGTTGCTGCTTGGAAAGACAAGGATGGGGATTGGTATGAAACAGG	TTTATATGTAAGAAAGTTTGTATATAATGAAACAGTGTATGTGTAACAGGTTGCTGCTTGGAAAGACAAGGATGGGGATTGGTATGAAACAGG	93	6	Sub	N/A
272	TTTATATGTAAGAGAGTTTGTATACAATGAAATAGTATATGTGTAACAGGTTGCTGCTTGGAAAGACAAGGATGGGGATTGGTATGAAACAGG	TTTATATGTAAGAGAGTTTGTATACAATGAAATAGTATATGTGTAATAGGTTGCTGCTTGGAAAGAC----ATGGGGATTAGTATGAAACAGG	89	6	del	N/A
273	TTTATATGTAAGAGAGTTTGTATACAATGAAATAGTATATGTGTAACAGGTTGCTGCTTGGAAAGACAAGGATGGGGATTGGTATGAAACAGG	TTTATATGTAAGAGAGTTTGTATACAATGAAATTGTATATGTGTAATAGGTTGCTGCTTGGAAAGACAAGGATGGGGATTGGTATGAAACAGG	93	6	Sub	N/A
274	TTTATATGTAAGAGAGTTTGTATACAATGAAATAGTATATGTGTAACAGGTTGCTGCTTGGAAAGACAAGGATGGGGATTGGTATGAAACAGG	TTTATATGTAAGAGAGTTTGTATACAATGACATAGTATACGTGTAACAGGTTGCTGCTTGGAAAGACAAGGATGGGGATTGGTATGAAACAGG	93	6	Sub	N/A
275	TTTATATGTAAGAGAGTTTGTATACAATGAAATAGTATATGTGTAACAGGTTGCTGCTTGGAAAGACAAGGATGGGGATTGGTATGAAACAGG	TTTATATGTAAGAGAGTTTGTATACAATGAAATAGTATATGTGTAACATGTTGCGGCTTGGAAAGACAAGGATGGGGATTGGTATGAAACAGG	93	6	Sub	N/A
276	TTTATATGTAAGAGAGTTTGTATACAATGAAATAGTATATGTGTAACAGGTTGCTGCTTGGAAAGACAAGGATGGGGATTGGTATGAAACAGG	TTTATATGTAAGAGAGTTTGTATACTATGAAATAGTATATGTGTAATAGGTTGCTGCTTGGAAAGACAAGGATGGGGATTGGTATGAAACAGG	93	6	Sub	N/A
277	TTTATATGTAAGAGAGTTTGTATACAATGAAATAGTATATGTGTAACAGGTTGCTGCTTGGAAAGACAAGGATGGGGATTGGTATGAAACAGG	TTTATATGTAAGAGAGTTTGTATACAATGAAATAGTATATGTGTAACAGGTTTCTGCTTGGAAAGATAAGGATGGGGATTGGTATGAAACAGG	93	6	Sub	N/A
278	TTTATATGTAAGAGAGTTTGTATACAATGAAATAGTATATGTGTAACAGGTTGCTGCTTGGAAAGACAAGGATGGGGATTGGTATGAAACAGG	TTTATATGTAAGAGAGTTTGTATACAATGAAATAGTATATGTGTAATAGGTTGCTGCTTGGAAAGACAAGGATTGGGATTGGTATGAAACAGG	93	6	Sub	N/A
279	TTTATATGTAAGAGAGTTTGTATACAATGAAATAGTATATGTGTAACAGGTTGCTGCTTGGAAAGACAAGGATGGGGATTGGTATGAAACAGG	TTTATATGTAAGAGAGTTTGTATACAATGAAATAGTATATGTGTAATTGGTTGCTGCTTGGAAAGATAAGGATGGGGATTGGTATGAAACAGG	93	6	Sub	N/A
280	TTTATATGTAAGAGAGTTTGTATACAATGAAATAGTATATGTGTAACAGGTTGCTGCTTGGAAAGACAAGGATGGGGATTGGTATGAAACAGG	TTTATATGTAAGAGAGTTTGTATACAATGAAATAGTATATGTGTAACAGGTTCCTGCTTGGAAAGACAAGGATGGGGATTGCTATGAAACAGG	93	6	Sub	N/A
281	TTTATATGTAAGAGAGTTTGTATACAATGAAATAGTATATGTGTAACAGGTTGCTGCTTGGAAAGACAAGGATGGGGATTGGTATGAAACAGG	TTTATATGTAAGAGAGTTTGTATACAATGAAATAGTATATGTGTAACAGGTTGCTGCTTGGAAAGAC----ATGGGGTTTGGTATGAAACAGG	89	6	del	N/A
282	TTTATATGTAAGAGAGTTTGTATACAATGAAATAGTATATGTGTAACAGGTTGCTGCTTGGAAAGACAAGGATGGGGATTGGTATGAAACAGG	TTTATATGTAAGAGAGTTTGTATACCATGAAATAGTATATGTGTAACAGGTTGCTGCTTGGAAAGACAAGGATGGGGATTGGTATGAAACACG	93	6	Sub	N/A
283	TTTATATGTAAGAGAGTTTGTATACAATGAAATAGTATATGTGTAACAGGTTGCTGCTTGGAAAGACAAGGATGGGGATTGGTATGAAACAGG	TTTATATGTAAGTGAGTTTGTATACAATGAAATAGTATATGTGTAACAGGTTGCTGCTTGGAAAGACAAGGATGGGGATTGGTATGAAACAGG	93	6	Sub	N/A
284	TTTATATGTAAGAGAGTTTGTATACAATGAAATAGTATATGTGTAACAGGTTGCTGCTTGGAAAGACAAGGATGGGGATTGGTATGAAACAGG	TTTATATGTAAGAGAGTTTGTATACAATGAAATAGTGTATGTGTAACAGGTTGCTGCTTGGAAAGACAAGGATGGGGATTAGTATGAAACAGG	93	6	Sub	N/A
285	TTTATATGTAAGAGAGTTTGTATACAATGAAATAGTATATGTGTAACAGGTTGCTGCTTGGAAAGACAAGGATGGGGATTGGTATGAAACAGG	TTTATATGTAAGAGAGTTTGTATATAATGAAACAGTGTATGTGTAACAGGTTGCTGCTGGGAAAGAC----ATGGGGATTGGTATGAAACAGG	89	6	del	N/A
286	TTTATATGTAAGAGAGTTTGTATACAATGAAATAGTATATGTGTAACAGGTTGCTGCTTGGAAAGACAAGGATGGGGATTGGTATGAAACAGG	TTTATATGTAAGAGAGTTTGTATATAATGAAATAGTGTATGTGTAACAGGTTGCTACTTGGAAAGACAAGGATGGGGATTGGTATGAAACAGG	93	6	Sub	N/A
287	TTTATATGTAAGAGAGTTTGTATACAATGAAATAGTATATGTGTAACAGGTTGCTGCTTGGAAAGACAAGGATGGGGATTGGTATGAAACAGG	TTTATATGTAAGAGAGTTTGTATACAATGAAATAGTATATGTGTAACAGGTTGCTGCTTGGAAAGAACAGGATGGGGATTTGTATGAAACAGG	93	6	Sub	N/A
288	TTTATATGTAAGAGAGTTTGTATACAATGAAATAGTATATGTGTAACAGGTTGCTGCTTGGAAAGACAAGGATGGGGATTGGTATGAAACAGG	TTTATATGTAAGAGACTTTGTATACAATGAAATAGTATATGTGTAACAGGTTGCTGCTTGGAAAGACAAGGATGGGGATTGGTATGAAACAGG	93	6	Sub	N/A
289	TTTATATGTAAGAGAGTTTGTATACAATGAAATAGTATATGTGTAACAGGTTGCTGCTTGGAAAGACAAGGATGGGGATTGGTATGAAACAGG	TTTATATGTAAGAGAGTTTGTATACAATGAAATAGTATATGTGTAACAGGTTGCTGCTTGGAAAGA----TATGGGGATTGGTATGAAACAGG	89	6	del	N/A
290	TTTATATGTAAGAGAGTTTGTATACAATGAAATAGTATATGTGTAACAGGTTGCTGCTTGGAAAGACAAGGATGGGGATTGGTATGAAACAGG	TTTATATGTAAGAGAGTTTGTATACAATGAAATAGTATATGTGTAATAGGTTGCTGCTTGGAAAGAAAAGGATGGGGATTGGTCTGAAACAGG	93	6	Sub	N/A
291	TTTATATGTAAGAGAGTTTGTATACAATGAAATAGTATATGTGTAACAGGTTGCTGCTTGGAAAGACAAGGATGGGGATTGGTATGAAACAGG	TTTATATGTAAGAGAGTTTGTATACAATGAAATAGTATATGTGTAACAGGTTGATGCTTGGAAAGACAAGGATGGGGATTGGTATGCAACAGG	93	6	Sub	N/A
292	TTTATATGTAAGAGAGTTTGTATACAATGAAATAGTATATGTGTAACAGGTTGCTGCTTGGAAAGACAAGGATGGGGATTGGTATGAAACAGG	TTTATATGTAAGAGAGTTTGTATACAATGAAATAGTATATGTGTAACAGGTTGCTGCTTGGAAAGACGAGGATGGGGATTGGTATGAGACAGG	93	6	Sub	N/A
293	TTTATATGTAAGAGAGTTTGTATACAATGAAATAGTATATGTGTAACAGGTTGCTGCTTGGAAAGACAAGGATGGGGATTGGTATGAAACAGG	TTTATATGTAAGAGAGTTTGTATACAATGAAATAGTTTATGTGTAACAGGTTGCTGCTTGGAAAGACAAGGATGGGGATTGGTATGAAACAGG	93	6	Sub	N/A
294	TTTATATGTAAGAGAGTTTGTATACAATGAAATAGTATATGTGTAACAGGTTGCTGCTTGGAAAGACAAGGATGGGGATTGGTATGAAACAGG	TTTATATGTAAGAGAGTTTGTATACAATGAAATAGTATATGTGTAACAGGTTGCTGCTTGGAAAGATACGGATGGGGATTGGTATGAAACAGG	93	6	Sub	N/A
295	TTTATATGTAAGAGAGTTTGTATACAATGAAATAGTATATGTGTAACAGGTTGCTGCTTGGAAAGACAAGGATGGGGATTGGTATGAAACAGG	TTTATATGTAAGAGAGTTTGTATACAATGAAATAGTATATGTGTGACAGGTTGCTGCTTGGAAAGACAGGGATGGGGATTGGTATGAAACAGG	93	6	Sub	N/A
296	TTTATATGTAAGAGAGTTTGTATACAATGAAATAGTATATGTGTAACAGGTTGCTGCTTGGAAAGACAAGGATGGGGATTGGTATGAAACAGG	TTTATATGTAAGAGAGTTTGTATACAATGAAATAGTATATGTGTAATAGGTTGCTGGTTGGAAAGACAAGGATGGGGATTGGTATGAAACAGG	93	6	Sub	N/A
297	TTTATATGTAAGAGAGTTTGTATACAATGAAATAGTATATGTGTAACAGGTTGCTGCTTGGAAAGACAAGGATGGGGATTGGTATGAAACAGG	TTTATATGTAAGAGAGTTTGTATACAATGAAATAGTATATGTGTAACAGGTTGCTGCCTGGAAAGACAAGGATGGGGATTAGTATGAAACAGG	93	6	Sub	N/A
298	TTTATATGTAAGAGAGTTTGTATACAATGAAATAGTATATGTGTAACAGGTTGCTGCTTGGAAAGACAAGGATGGGGATTGGTATGAAACAGG	TTTATATGTAAGAGAGTTTGTATACAAAGAAATAGTATATGTGTAACAGGTTGCTGCTTGGAAAGACAAGGATGGGGATTGGTATGAAACAGG	93	6	Sub	N/A
299	TTTATATGTAAGAGAGTTTGTATACAATGAAATAGTATATGTGTAACAGGTTGCTGCTTGGAAAGACAAGGATGGGGATTGGTATGAAACAGG	TTTATATGTAAGAGAGTTTGTATACAATGAAATAGTATATGTGTAACAGGTTGCTGCTTGGAAAGAAAAAGATGGGGATTGGTATGAAACAGG	93	6	Sub	N/A
300	TTTATATGTAAGAGAGTTTGTATACAATGAAATAGTATATGTGTAACAGGTTGCTGCTTGGAAAGACAAGGATGGGGATTGGTATGAAACAGG	TTTATATGTAAGAGAGTTTGTATACAATGAAATAGTATATGTGTAACAGGTTGCTGCTTGGAAAGAC----ATGGGGATTGGTAGGAAACAGG	89	6	del	N/A
301	TTTATATGTAAGAGAGTTTGTATACAATGAAATAGTATATGTGTAACAGGTTGCTGCTTGGAAAGACAAGGATGGGGATTGGTATGAAACAGG	TTTATATGTAAGAGAGTTTGTATACAATGAAATAGTATATGTGTAACAGGTTGCTGCTTGGAAAGACAACGATGGGGATTGGTATGAAACACG	93	6	Sub	N/A
302	TTTATATGTAAGAGAGTTTGTATACAATGAAATAGTATATGTGTAACAGGTTGCTGCTTGGAAAGACAAGGATGGGGATTGGTATGAAACAGG	TTTATATGTAAGAGAGTTTGTATACAATGAAATAGTATATGTGTAACAGGTTGCTGCTTGGCAAGACAAGGATGGGGATTGGTATGACACAGG	93	6	Sub	N/A
303	TTTATATGTAAGAGAGTTTGTATACAATGAAATAGTATATGTGTAACAGGTTGCTGCTTGGAAAGACAAGGATGGGGATTGGTATGAAACAGG	TTTATATGTAAGAGAGTTTGTATACAATGAAATAGTATATGTGTAACAGGTTGCTGAGTGGAAAGACAAGGATGGGGATTGGTATGAAACAGG	93	6	Sub	N/A
304	TTTATATGTAAGAGAGTTTGTATACAATGAAATAGTATATGTGTAACAGGTTGCTGCTTGGAAAGACAAGGATGGGGATTGGTATGAAACAGG	TTTATATGTAAGAGAGTTTGTATACAATGAAATAGTATATGTGTAACGGGTTACTGCTTGGAAAGACAAGGATGGGGATTGGTATGAAACAGG	93	6	Sub	N/A
305	TTTATATGTAAGAGAGTTTGTATACAATGAAATAGTATATGTGTAACAGGTTGCTGCTTGGAAAGACAAGGATGGGGATTGGTATGAAACAGG	TTTATATGTAAGAGAGTTTGTATAAAATGAAATAGTATATGTGTTATAGGTTGCTGCTTGGAAAGACAAGGATGGGGATTGGTATGAAACAGG	93	6	Sub	N/A
306	TTTATATGTAAGAGAGTTTGTATACAATGAAATAGTATATGTGTAACAGGTTGCTGCTTGGAAAGACAAGGATGGGGATTGGTATGAAACAGG	TTTATATGTAAGAGAGTTTGTATACAATGAAATAGTATATGTGTAACAGGTTGCTGCTTGGAAAGACAATGATGGGGATTAGTATGAAACAGG	93	6	Sub	N/A
307	TTTATATGTAAGAGAGTTTGTATACAATGAAATAGTATATGTGTAACAGGTTGCTGCTTGGAAAGACAAGGATGGGGATTGGTATGAAACAGG	TTTATATGTAAGAGAGTTTGTATACAGTGAAATAGTATATGTGTAATAGGTTGCTGCTTGGAAAGACAAGGATGGGGATTGGTATGAAACAGG	93	6	Sub	N/A
308	TTTATATGTAAGAGAGTTTGTATACAATGAAATAGTATATGTGTAACAGGTTGCTGCTTGGAAAGACAAGGATGGGGATTGGTATGAAACAGG	TTTATATGTAAGAGAGTTTGTATACAATGAAATAGTATATGTGTAACAGGTTGATGCTTGGAAAGCCAAGGATGGGGATTGGTATGAAACAGG	93	6	Sub	N/A
309	TTTATATGTAAGAGAGTTTGTATACAATGAAATAGTATATGTGTAACAGGTTGCTGCTTGGAAAGACAAGGATGGGGATTGGTATGAAACAGG	TTTATATGTAAGAGAGTTTGTATACAATGAATTAGTATATGTGTAATAGGTTGCTGCTTGGAAAGACAAGGATGGGGATTGGTATGAAACAGG	93	6	Sub	N/A
310	TTTATATGTAAGAGAGTTTGTATACAATGAAATAGTATATGTGTAACAGGTTGCTGCTTGGAAAGACAAGGATGGGGATTGGTATGAAACAGG	TTTATATGTAAGAGAGTTTGTATATAATGAAATAGTATATGTGTAACAGGTTGCTGCTTGGAAAGAC----ATGGGGATTGGTATGAAACAGG	89	6	del	N/A
311	TTTATATGTAAGAGAGTTTGTATACAATGAAATAGTATATGTGTAACAGGTTGCTGCTTGGAAAGACAAGGATGGGGATTGGTATGAAACAGG	TTTACATGTAAGAGAGTTTGTATACAATGAAATAGTATATGTGTAATAGGTTGCTGCTTGGAAAGACAAGGATGGGGATTGGTATGAAACAGG	93	6	Sub	N/A
312	TTTATATGTAAGAGAGTTTGTATACAATGAAATAGTATATGTGTAACAGGTTGCTGCTTGGAAAGACAAGGATGGGGATTGGTATGAAACAGG	TTTATATGTAAGAGAGTTTGTATACAATGAAATAGTATATGTGTAACAGGTTGCTGCTTGGAAAGAGAAGGATGGGGATTGGTATGAGACAGG	93	6	Sub	N/A
313	TTTATATGTAAGAGAGTTTGTATACAATGAAATAGTATATGTGTAACAGGTTGCTGCTTGGAAAGACAAGGATGGGGATTGGTATGAAACAGG	TTTATATGTAAGAGAGTTTGTATACAATGAAATAGTATATGTGTAACAGGTTGCTGCTTGGAAAGATACGGATGGGGATTCGTATGAAACAGG	93	6	Sub	N/A
314	TTTATATGTAAGAGAGTTTGTATACAATGAAATAGTATATGTGTAACAGGTTGCTGCTTGGAAAGACAAGGATGGGGATTGGTATGAAACAGG	TTTATATGTAAGAGAGTTTGTATACAATGAAATAGTATATGTGTAACAGGTTTCTGCTTGGAAAGACAAGGATGGGGATTGGTATGACACAGG	93	6	Sub	N/A
315	TTTATATGTAAGAGAGTTTGTATACAATGAAATAGTATATGTGTAACAGGTTGCTGCTTGGAAAGACAAGGATGGGGATTGGTATGAAACAGG	TTTATATGTAAGAGAGTTTGTATACAATGAAATAGTATATGTGTAACAGGTTGCTGCTTGGAAAGGCAAGGATGGGGATTGGTATGACACAGG	93	6	Sub	N/A
316	TTTATATGTAAGAGAGTTTGTATACAATGAAATAGTATATGTGTAACAGGTTGCTGCTTGGAAAGACAAGGATGGGGATTGGTATGAAACAGG	TTTATATGCAAGAGAGTTTGTATACAATGAAATAGTATATGTGTAACAGGTTGCTGCTTGGAAAGGCAAGGATGGGGATTGGTATGAAACAGG	93	6	Sub	N/A
317	TTTATATGTAAGAGAGTTTGTATACAATGAAATAGTATATGTGTAACAGGTTGCTGCTTGGAAAGACAAGGATGGGGATTGGTATGAAACAGG	TTTATATGTAAGAGAGTTTGTATACAATGAAATAGTATATGTGTAACAGGTTGCTGCTTGGAAAGACACGGATGGGGATTGGTATGCAACAGG	93	6	Sub	N/A
318	TTTATATGTAAGAGAGTTTGTATACAATGAAATAGTATATGTGTAACAGGTTGCTGCTTGGAAAGACAAGGATGGGGATTGGTATGAAACAGG	TTTATATGTAAGAGAGTTTGTATACAATGAAATAGTATATGTGTAACAGGTTGCTACTTGGAAAGACAAGGATGGGGATTAGTATGAAACAGG	93	6	Sub	N/A
319	TTTATATGTAAGAGAGTTTGTATACAATGAAATAGTATATGTGTAACAGGTTGCTGCTTGGAAAGACAAGGATGGGGATTGGTATGAAACAGG	TTTATATGTAAGAGAGTTTGTATACAATGAAATAGTATATGTGTAACGGGTTGCTGCTTGGAAAGACAAAGATGGGGATTGGTATGAAACAGG	93	6	Sub	N/A
320	TTTATATGTAAGAGAGTTTGTATACAATGAAATAGTATATGTGTAACAGGTTGCTGCTTGGAAAGACAAGGATGGGGATTGGTATGAAACAGG	TTTATATGTAAGAGAGTTTGTATACAATGAAATAGTATATGTGTAACAGGTTGATGCTTGGAAAGACAAGGATGGGGATTGGTCTGAAACAGG	93	6	Sub	N/A
321	TTTATATGTAAGAGAGTTTGTATACAATGAAATAGTATATGTGTAACAGGTTGCTGCTTGGAAAGACAAGGATGGGGATTGGTATGAAACAGG	TTTATATGTAAGAGAGTTTGTATACAATGAAATAGTATATGTGTAACAGGTTGCTGCTTGGAAAGAC----ATGGGGATTGCTATGAAACAGG	89	6	del	N/A
322	TTTATATGTAAGAGAGTTTGTATACAATGAAATAGTATATGTGTAACAGGTTGCTGCTTGGAAAGACAAGGATGGGGATTGGTATGAAACAGG	TTTATATGTAAGAGAGTTTGTATACAATGAAATAGTATATGTGTAACAGGTTGCGGCTTGGAAAGACAAGGATGGGGAGTGGTATGAAACAGG	93	6	Sub	N/A
323	TTTATATGTAAGAGAGTTTGTATACAATGAAATAGTATATGTGTAACAGGTTGCTGCTTGGAAAGACAAGGATGGGGATTGGTATGAAACAGG	TTTATATGTAAGAGAGTTTGTATACAATGAAATAGTATATGTGTACTAGGTTGCTGCTTGGAAAGACAAGGATGGGGATTGGTATGAAACAGG	93	6	Sub	N/A
324	TTTATATGTAAGAGAGTTTGTATACAATGAAATAGTATATGTGTAACAGGTTGCTGCTTGGAAAGACAAGGATGGGGATTGGTATGAAACAGG	TTTATATGTAAGAGAGTTTGTATACAATGAAATAGTATATGTGTAACAGGTTGCTGCTTGGAAAGACAAGGATGGGGGTTGGTATGAAACAGC	93	6	Sub	N/A
325	TTTATATGTAAGAGAGTTTGTATACAATGAAATAGTATATGTGTAACAGGTTGCTGCTTGGAAAGACAAGGATGGGGATTGGTATGAAACAGG	TTTATATGTAAGAGAGTTTGTATACAATGAAATAGTATATGTGTAACAGGTTGCGGCTTGGAAAGACGAGGATGGGGATTGGTATGAAACAGG	93	6	Sub	N/A
326	TTTATATGTAAGAGAGTTTGTATACAATGAAATAGTATATGTGTAACAGGTTGCTGCTTGGAAAGACAAGGATGGGGATTGGTATGAAACAGG	TTTATATGTAAGAGAGTTTGTATACAATGAAATAGTATATGTGTAACGGGTTGCTGCTTGGAAAGACAACGATGGGGATTGGTATGAAACAGG	93	6	Sub	N/A
327	TTTATATGTAAGAGAGTTTGTATACAATGAAATAGTATATGTGTAACAGGTTGCTGCTTGGAAAGACAAGGATGGGGATTGGTATGAAACAGG	TTTATATGTAAGAGAGTTTGTATACAATGAAATAGTATATGTGTAATAGGTTGCTGCTTGGAAAGACAACGATGGGGACTGGTATGAAACAGG	93	6	Sub	N/A
328	TTTATATGTAAGAGAGTTTGTATACAATGAAATAGTATATGTGTAACAGGTTGCTGCTTGGAAAGACAAGGATGGGGATTGGTATGAAACAGG	TTTATATGTAAGAGAGTTTGTATATAATGAAACAGTGTATGTGTAACAGGTTGCTGCTTGGAAAGAC----ATGGGGATTCGTATGAAACAGG	89	6	del	N/A
329	TTTATATGTAAGAGAGTTTGTATACAATGAAATAGTATATGTGTAACAGGTTGCTGCTTGGAAAGACAAGGATGGGGATTGGTATGAAACAGG	TTTATATGTAAGAGTGTTTGTATACAATGAAATAGTATATGTGTAACAGGTTGCTGCTTGGAAAGACAAGGATGGGGATTAGTATGAAACAGG	93	6	Sub	N/A
330	TTTATATGTAAGAGAGTTTGTATACAATGAAATAGTATATGTGTAACAGGTTGCTGCTTGGAAAGACAAGGATGGGGATTGGTATGAAACAGG	TTTATATGTAAGAGAGTTTGTATACAATGAAATAGTATATGTGTAACAGGTTGCTGCTTGGAGAGACAAGGATGGGGATTGGTATGAAACATG	93	6	Sub	N/A
331	TTTATATGTAAGAGAGTTTGTATACAATGAAATAGTATATGTGTAACAGGTTGCTGCTTGGAAAGACAAGGATGGGGATTGGTATGAAACAGG	TTTATATGTAAGAGAGTTTGTATACAATGAAATAGTATATGTGTAACAGGTTGCTGCTTGGACAGACAAGGATGGGGATTGGTATGAAACATG	93	6	Sub	N/A
332	TTTATATGTAAGAGAGTTTGTATACAATGAAATAGTATATGTGTAACAGGTTGCTGCTTGGAAAGACAAGGATGGGGATTGGTATGAAACAGG	TTTATATGTAAGAGAGTTTGTATACAATGAAATAGTATATGTGTAACAGGTTGCTGCTTGGACAGACATGGATGGGGATTGGTATGAAACACG	93	6	Sub	N/A
333	TTTATATGTAAGAGAGTTTGTATACAATGAAATAGTATATGTGTAACAGGTTGCTGCTTGGAAAGACAAGGATGGGGATTGGTATGAAACAGG	TTTATATGTAAGAGAGTTTGTATACAATGAAATAGTATATGTGTAACAGGTTGCTGCTTGGAGAGACACGGATGGGGATTGGTATGAAACACG	93	6	Sub	N/A
334	TTTATATGTAAGAGAGTTTGTATACAATGAAATAGTATATGTGTAACAGGTTGCTGCTTGGAAAGACAAGGATGGGGATTGGTATGAAACAGG	TTTATATGTAAGAGAGTTTGTATACAATGAAATAGTATATGTGTAACAGGTTGCTGCTTGGAAAGAC----ATGGGGATTGGTATGATACAGG	89	6	del	N/A
335	TTTATATGTAAGAGAGTTTGTATACAATGAAATAGTATATGTGTAACAGGTTGCTGCTTGGAAAGACAAGGATGGGGATTGGTATGAAACAGG	TTTATATGTAAGAGAGTTTGTATACAATGAAATACTATATGTGTAACAGGTTGCTGCTTGGAAAGACAAGGATGGGGATTGGTAGGAAACAGG	93	6	Sub	N/A
336	TTTATATGTAAGAGAGTTTGTATACAATGAAATAGTATATGTGTAACAGGTTGCTGCTTGGAAAGACAAGGATGGGGATTGGTATGAAACAGG	TTTATATGTAAGAGAGTTTGTATACAATGAAATAGTATATGTGTAACCGGTTGCTGCTTGGAAAGACAAGGATGGGGATTGGTATGAAACAAG	93	6	Sub	N/A
337	TTTATATGTAAGAGAGTTTGTATACAATGAAATAGTATATGTGTAACAGGTTGCTGCTTGGAAAGACAAGGATGGGGATTGGTATGAAACAGG	TTTATATGTAAGAGAGTTTGTATACAATGAAATAGTATATGTGTAACAGGTTGCTGCTTGGCAAGCCAAGGATGGGGATTGGTATGAAACAGG	93	6	Sub	N/A
338	TTTATATGTAAGAGAGTTTGTATACAATGAAATAGTATATGTGTAACAGGTTGCTGCTTGGAAAGACAAGGATGGGGATTGGTATGAAACAGG	TTTATATGTAAGAGAGTTTGTATACAATGAAATAGTATATGTGTAACAGGTTGCTGCTTGGTAAGGCAAGGATGGGGATTGGTATGAAACAGG	93	6	Sub	N/A
339	TTTATATGTAAGAGAGTTTGTATACAATGAAATAGTATATGTGTAACAGGTTGCTGCTTGGAAAGACAAGGATGGGGATTGGTATGAAACAGG	TTTATATGTAAGAGAGTTTGTATACAATGAAATAGTATATGTGTAACAGGTTGCAGCTTGGGAAGACAAGGATGGGGAATGGTATGAAACAGG	93	6	Sub	N/A
340	TTTATATGTAAGAGAGTTTGTATACAATGAAATAGTATATGTGTAACAGGTTGCTGCTTGGAAAGACAAGGATGGGGATTGGTATGAAACAGG	TTTATATGTAAGAGAGTTTGTATACAATGAAATAGTATATGTGTAACAGGTTGCGGCTTGGGAAGACAAGGATGGGGACTGGTATGAAACAGG	93	6	Sub	N/A
341	TTTATATGTAAGAGAGTTTGTATACAATGAAATAGTATATGTGTAACAGGTTGCTGCTTGGAAAGACAAGGATGGGGATTGGTATGAAACAGG	TTTATATGTAAGAGAGTTTGTATACAATGAAATAGTATATGTGTAACAGGTTGCTGCTTGGGAAGACAAGGATGGGGACTGGTATGAAACAGG	93	6	Sub	N/A
342	TTTATATGTAAGAGAGTTTGTATACAATGAAATAGTATATGTGTAACAGGTTGCTGCTTGGAAAGACAAGGATGGGGATTGGTATGAAACAGG	TTTATATGTAAGAGAGTTTGTATACAATGAAATAGTATATGTGTAACAGGTTGCCGCTTGGCAAGACAAGGATGGGGACTGGTATGAAACAGG	93	6	Sub	N/A
343	TTTATATGTAAGAGAGTTTGTATACAATGAAATAGTATATGTGTAACAGGTTGCTGCTTGGAAAGACAAGGATGGGGATTGGTATGAAACAGG	TTTATATGTAAGAGAGTTTGTATACAATGAAATAGTATATGTGTAACAGGTTGCCGCTTGGAAAGACAAGGATGGGGAGTGGTATGAAACAGG	93	6	Sub	N/A
344	TTTATATGTAAGAGAGTTTGTATACAATGAAATAGTATATGTGTAACAGGTTGCTGCTTGGAAAGACAAGGATGGGGATTGGTATGAAACAGG	TTTATATGTAAGAGAGTTTGTATACAATGAAATAGTATATGTGTAACAGGTTGCTGCTTGTAAAGACAAGGATGGGGATTGGTTTGAAACAGG	93	6	Sub	N/A
345	TTTATATGTAAGAGAGTTTGTATACAATGAAATAGTATATGTGTAACAGGTTGCTGCTTGGAAAGACAAGGATGGGGATTGGTATGAAACAGG	TTTATATGTAAGAGAGCTTGTATACAATGAAATAGTATATGTGTAACAGGTTGCTGCTTGGAAAGACAAGGATGGGGATTAGTATGAAACAGG	93	6	Sub	N/A
346	TTTATATGTAAGAGAGTTTGTATACAATGAAATAGTATATGTGTAACAGGTTGCTGCTTGGAAAGACAAGGATGGGGATTGGTATGAAACAGG	TTTATATGTAAGAGAGTTTGTATACAATGAAATAGTATATGTGTAACAGAATGCTGCTTGGAAAGACAAGGATGGGGATTGGTATGAAACAGG	93	6	Sub	N/A
347	TTTATATGTAAGAGAGTTTGTATACAATGAAATAGTATATGTGTAACAGGTTGCTGCTTGGAAAGACAAGGATGGGGATTGGTATGAAACAGG	TTTATATGTAAGAGAGTTTGTATACAATGAAATAGTATATGTGTAACAGTGTGCTGCTTGGAAAGACAAGGATGGGGATTGGTATGAAACAGG	93	6	Sub	N/A
348	TTTATATGTAAGAGAGTTTGTATACAATGAAATAGTATATGTGTAACAGGTTGCTGCTTGGAAAGACAAGGATGGGGATTGGTATGAAACAGG	TTTATATGTAAGAGAGTTTGTATACAATGAAATAGTATATGTGTAACAGCTTGCTGCTTGGAAAGACAAGGATGGGGATTGGGATGAAACAGG	93	6	Sub	N/A
349	TTTATATGTAAGAGAGTTTGTATACAATGAAATAGTATATGTGTAACAGGTTGCTGCTTGGAAAGACAAGGATGGGGATTGGTATGAAACAGG	TTTATATGTAAGAGAGTTTGTATACAATGAAATAGTATATGTGTAACAGCATGCTGCTTGGAAAGACAAGGATGGGGATTGGGATGAAACAGG	93	6	Sub	N/A
350	TTTATATGTAAGAGAGTTTGTATACAATGAAATAGTATATGTGTAACAGGTTGCTGCTTGGAAAGACAAGGATGGGGATTGGTATGAAACAGG	TTTATATGTAAGAGAGTTTGTATACAATGAAATAGTATATGTGTAATAGGATGCTGCTTGGAAAGACAAGGATGGGGATTGGCATGAAACAGG	93	6	Sub	N/A
351	TTTATATGTAAGAGAGTTTGTATACAATGAAATAGTATATGTGTAACAGGTTGCTGCTTGGAAAGACAAGGATGGGGATTGGTATGAAACAGG	TTTATATGTAAGAGAGTTTGTATACAATGAAATAGTATATGTGTAATAGGCTGCTGCTTGGAAAGACAAGGATGGGGATTGGAATGAAACAGG	93	6	Sub	N/A
352	TTTATATGTAAGAGAGTTTGTATACAATGAAATAGTATATGTGTAACAGGTTGCTGCTTGGAAAGACAAGGATGGGGATTGGTATGAAACAGG	TTTATATGTAAGAGAGGTTGTATACAATGAAATAGTATATGTGTAACAGGTTGCTGCTTGGAAAGACAAGGATGGGGATTCGTATGAAACAGG	93	6	Sub	N/A
353	TTTATATGTAAGAGAGTTTGTATACAATGAAATAGTATATGTGTAACAGGTTGCTGCTTGGAAAGACAAGGATGGGGATTGGTATGAAACAGG	TTTATATGTAAGAGAGTTTGTATACAATGAAATAGTATATGTGTAATAGGTTGCTGCTTAGAAAGACAAGGATGGGGATTTGTATGAAACAGG	93	6	Sub	N/A
354	TTTATATGTAAGAGAGTTTGTATACAATGAAATAGTATATGTGTAACAGGTTGCTGCTTGGAAAGACAAGGATGGGGATTGGTATGAAACAGG	TTTATATGTAAGAGAGTTTGTATACAATGAAATAGTATATGTGTAACAGGTTGCTGCTTCAAAAGACAAGGATGGGGATTGGTATGAAACAGG	93	6	Sub	N/A
355	TTTATATGTAAGAGAGTTTGTATACAATGAAATAGTATATGTGTAACAGGTTGCTGCTTGGAAAGACAAGGATGGGGATTGGTATGAAACAGG	TTTATGTGTAAGAGAGTTTGTATACAATGAAATAGTATATGTGTAACAGGTTGCTGCTTGGAAAGACAAGGCTGGGGATTGGTATGAAACAGG	93	6	Sub	N/A
356	TTTATATGTAAGAGAGTTTGTATACAATGAAATAGTATATGTGTAACAGGTTGCTGCTTGGAAAGACAAGGATGGGGATTGGTATGAAACAGG	TTTATATGTAAGAGAGTTTGTATACAATGAAATAGTATATGTGTAATAGGTTGATGCTTGGAAAGACAAGGTTGGGGATTGGTATGAAACAGG	93	6	Sub	N/A
357	TTTATATGTAAGAGAGTTTGTATACAATGAAATAGTATATGTGTAACAGGTTGCTGCTTGGAAAGACAAGGATGGGGATTGGTATGAAACAGG	TTTATATGTAAGAGAGTTTGTATACAATGAAATAGTATATGTGTAATAGGTTGCTGCTTGGAAAGAAAAGGATGGGGATTGGTATGAAACAGC	93	5	Sub	N/A
358	TTTATATGTAAGAGAGTTTGTATACAATGAAATAGTATATGTGTAACAGGTTGCTGCTTGGAAAGACAAGGATGGGGATTGGTATGAAACAGG	TTTATATGTAAGAGAGTTTGTATACAATGAAATAGTATATGTGTAACAGGTTGCTGTTTGGAAAGAAAAGGATGGGGATTGGTATGAAACAGG	93	5	Sub	N/A
359	TTTATATGTAAGAGAGTTTGTATACAATGAAATAGTATATGTGTAACAGGTTGCTGCTTGGAAAGACAAGGATGGGGATTGGTATGAAACAGG	TTTATATGTAAGAGAGTTTGTATACAATGAAATAGTATATGTGTAACAGGTTGCTGCTTGGAAAGACGAGGATGGGGATTGGTATGAAACAGA	93	5	Sub	N/A
360	TTTATATGTAAGAGAGTTTGTATACAATGAAATAGTATATGTGTAACAGGTTGCTGCTTGGAAAGACAAGGATGGGGATTGGTATGAAACAGG	TTTATATGTAAGAGAGTTTGTATACAATGAAATAGTATATGTGTAACAGGTTGCTGCTTGGAAAGACGAGGATGGGGATTGGTATGAAACAAG	93	5	Sub	N/A
361	TTTATATGTAAGAGAGTTTGTATACAATGAAATAGTATATGTGTAACAGGTTGCTGCTTGGAAAGACAAGGATGGGGATTGGTATGAAACAGG	TTTATATGTAAGAGAGTTTGTATACAATGAAATAGTATATGTGTAACGGGTTGCTGCTTGGAAAGACAAGGATGGGGATTGGTATGAAACAGA	93	5	Sub	N/A
362	TTTATATGTAAGAGAGTTTGTATACAATGAAATAGTATATGTGTAACAGGTTGCTGCTTGGAAAGACAAGGATGGGGATTGGTATGAAACAGG	TTTATATGTAAGAGAGTTTGTATACAATGAAATAGTATATGTGTAACAGGTTGCTGCTTGGAAAGATTAGGATGGGGGTTGGTATGAAACAGG	93	5	Sub	N/A
363	TTTATATGTAAGAGAGTTTGTATACAATGAAATAGTATATGTGTAACAGGTTGCTGCTTGGAAAGACAAGGATGGGGATTGGTATGAAACAGG	TTTATATGTAAGAGAGTTTGTATACAATGAAATAGTATATGTGTAACAGGTTGCTGCTTGGAAAGAGAAGGATGGGGATTGGTGTGAAACAGG	93	5	Sub	N/A
364	TTTATATGTAAGAGAGTTTGTATACAATGAAATAGTATATGTGTAACAGGTTGCTGCTTGGAAAGACAAGGATGGGGATTGGTATGAAACAGG	TTTATATGTAAGAGAGTTTGTATACAATGAAATAGTATATGTGTAACAGGTTGCTGCTTGGAAAGACAAGGATGGGGGTTTGTATGAAACAGG	93	5	Sub	N/A
365	TTTATATGTAAGAGAGTTTGTATACAATGAAATAGTATATGTGTAACAGGTTGCTGCTTGGAAAGACAAGGATGGGGATTGGTATGAAACAGG	TTTATATGTAAGAGAGTTTGTATACAATGAAATAGTATATGTGTAACAGGTTGCTGCTTGGAAAGAACAGGATGGGGCTTAGTATGAAACAGG	93	5	Sub	N/A
366	TTTATATGTAAGAGAGTTTGTATACAATGAAATAGTATATGTGTAACAGGTTGCTGCTTGGAAAGACAAGGATGGGGATTGGTATGAAACAGG	TTTATATGTAAGAGAGTTTGTATACAATGAAATAGTATATGTGTAACAGGTTGCAGCCTGGAAAGACAAGGATGGGGATTGGTATGAAACAGG	93	5	Sub	N/A
367	TTTATATGTAAGAGAGTTTGTATACAATGAAATAGTATATGTGTAACAGGTTGCTGCTTGGAAAGACAAGGATGGGGATTGGTATGAAACAGG	TTTATATGTAAGAGAGTTTGTATACAATGGAATAGTATATGTGTAACGGGTTGCTGCTTGGAAAGACAAGGATGGGGATTGGTATGAAACAGG	93	5	Sub	N/A
368	TTTATATGTAAGAGAGTTTGTATACAATGAAATAGTATATGTGTAACAGGTTGCTGCTTGGAAAGACAAGGATGGGGATTGGTATGAAACAGG	TTTATATGTAAGAGAGTTTGTATACAATGAAATAGTATATGTGTAACAGGTTGATGCTTGGAAAGAGAAGGATGGGGATTGGTATGAAACAGG	93	5	Sub	N/A
369	TTTATATGTAAGAGAGTTTGTATACAATGAAATAGTATATGTGTAACAGGTTGCTGCTTGGAAAGACAAGGATGGGGATTGGTATGAAACAGG	TTTATATGTAAGAGAGTTTGTATACAATGAAATAGTATATGTGTAACAGGTTGCTGCATGGAAAGACGAGGATGGGGATTGGTATGAAACAGG	93	5	Sub	N/A
370	TTTATATGTAAGAGAGTTTGTATACAATGAAATAGTATATGTGTAACAGGTTGCTGCTTGGAAAGACAAGGATGGGGATTGGTATGAAACAGG	TTTATATGTAAGAGAGTTTGTATACAATGAAATAGTATATGTGTAACAGGTTGCTGCTTGGAAAGACCTGGATGGGGATTGGTATGAAACAGG	93	5	Sub	N/A
371	TTTATATGTAAGAGAGTTTGTATACAATGAAATAGTATATGTGTAACAGGTTGCTGCTTGGAAAGACAAGGATGGGGATTGGTATGAAACAGG	TTTATATGTAAGAGAGTTTGTATACAATGAAATAGTATATGTGTAACGGGTTGCTGCTTGGAAAGACAAGGATGGGGATTGGTCTGAAACAGG	93	5	Sub	N/A
372	TTTATATGTAAGAGAGTTTGTATACAATGAAATAGTATATGTGTAACAGGTTGCTGCTTGGAAAGACAAGGATGGGGATTGGTATGAAACAGG	TTTATATGTAAGAGAGTTTGTATACAATGAAATAGTATATGGGTAATAGGTTGCTGCTTGGAAAGACAAGGATGGGGATTGGTATGAAACAGG	93	5	Sub	N/A
373	TTTATATGTAAGAGAGTTTGTATACAATGAAATAGTATATGTGTAACAGGTTGCTGCTTGGAAAGACAAGGATGGGGATTGGTATGAAACAGG	TTTATATGTAAGAGAGTTTGTATACAATGAAATAGTATATGTGTAACAGGTTGCTGCGTGGAAAGAAAAGGATGGGGATTGGTATGAAACAGG	93	5	Sub	N/A
374	TTTATATGTAAGAGAGTTTGTATACAATGAAATAGTATATGTGTAACAGGTTGCTGCTTGGAAAGACAAGGATGGGGATTGGTATGAAACAGG	TTTATATGTAAGAGAGTTTGTATACAATGAAATAGTATATGTGTAATAGGTTGATGCTTGGAAAGACGAGGATGGGGATTGGTATGAAACAGG	93	5	Sub	N/A
375	TTTATATGTAAGAGAGTTTGTATACAATGAAATAGTATATGTGTAACAGGTTGCTGCTTGGAAAGACAAGGATGGGGATTGGTATGAAACAGG	TTTATATGTAAGAGAGTTTGTATACAATGAAATAGTATATGTGTAATAGTTTGCTGCTTGGAAAGACAAGGATGGGGATTGGTATGAAACAGG	93	5	Sub	N/A
376	TTTATATGTAAGAGAGTTTGTATACAATGAAATAGTATATGTGTAACAGGTTGCTGCTTGGAAAGACAAGGATGGGGATTGGTATGAAACAGG	TTTATATGTAAGAGAGTTTGTATACAATGAAATAGTATATGTGTAACAGGTTGCTGCTTGGAAAGACAAGCATGGGGATTAGTATGAAACAGG	93	5	Sub	N/A
377	TTTATATGTAAGAGAGTTTGTATACAATGAAATAGTATATGTGTAACAGGTTGCTGCTTGGAAAGACAAGGATGGGGATTGGTATGAAACAGG	TTTATATGTAAGAGAGTTTGTATACAATGAAATAGTATATGTGTAACAGGTTGCCGCTTGGAAAGACAACGATGGGGATTGGTATGAAACAGG	93	5	Sub	N/A
378	TTTATATGTAAGAGAGTTTGTATACAATGAAATAGTATATGTGTAACAGGTTGCTGCTTGGAAAGACAAGGATGGGGATTGGTATGAAACAGG	TTTATATGTAAGAGAGTTTGTATACAATGAAATAGTATATGTGTAACAGGTTGCTGCTTGGAAAGACAAGGATGGGGGTTGCTATGAAACAGG	93	5	Sub	N/A
379	TTTATATGTAAGAGAGTTTGTATACAATGAAATAGTATATGTGTAACAGGTTGCTGCTTGGAAAGACAAGGATGGGGATTGGTATGAAACAGG	TTTATATGTAAGAGAGTTTGTATATAATGAAACAGTGTATGTGTAACAGGTTGCTGCTTGGAAAGAC----ATGGGGATTGGTATGAAACAGA	89	5	del	N/A
380	TTTATATGTAAGAGAGTTTGTATACAATGAAATAGTATATGTGTAACAGGTTGCTGCTTGGAAAGACAAGGATGGGGATTGGTATGAAACAGG	TTTATATGTAAGAGAGTTTGTATACAATGAAATAGTATATGTGTAACTGGTTGCGGCTTGGAAAGATTTGGATGGGGGTTGGTATGAAACAGG	93	5	Sub	N/A
381	TTTATATGTAAGAGAGTTTGTATACAATGAAATAGTATATGTGTAACAGGTTGCTGCTTGGAAAGACAAGGATGGGGATTGGTATGAAACAGG	TTTATATGTAAGAGAGTTTGTATATAATGAAACAGTGTATGTGTAACAGGTTGCTGCTTGGAAAGATAAGGATGGGGATTGGTATGAAACAGG	93	5	Sub	N/A
382	TTTATATGTAAGAGAGTTTGTATACAATGAAATAGTATATGTGTAACAGGTTGCTGCTTGGAAAGACAAGGATGGGGATTGGTATGAAACAGG	TTTATATGTAAGAGAGTTTGTATACAATGAAATAGTATATGTGTAACAGGTTTCTGCTTGGAAAGACTAGGATGGGGATTGGTATGAAACAGG	93	5	Sub	N/A
383	TTTATATGTAAGAGAGTTTGTATACAATGAAATAGTATATGTGTAACAGGTTGCTGCTTGGAAAGACAAGGATGGGGATTGGTATGAAACAGG	TTTATATGTAAGAGAGTTTGTATACAATGAAATAGTATATGTGTAACGGGTTGCTGCTTGGAAAGACAGGGATGGGGATTGGTATGAAACAGG	93	5	Sub	N/A
384	TTTATATGTAAGAGAGTTTGTATACAATGAAATAGTATATGTGTAACAGGTTGCTGCTTGGAAAGACAAGGATGGGGATTGGTATGAAACAGG	TTTATATGTAAGAGAGTTTGTATACAATGAAATAGTATATGTGTGACAGGTTGCTGCTTGGAAAGACAAGGATGGGGATTAGTATGAAACAGG	93	5	Sub	N/A
385	TTTATATGTAAGAGAGTTTGTATACAATGAAATAGTATATGTGTAACAGGTTGCTGCTTGGAAAGACAAGGATGGGGATTGGTATGAAACAGG	TTTATATGTAAGAGAGTTTGCATACAATGAAATAGTATATGCGTAACAGGTTGCTGCTTGGAAAGACAAGGATGGGGATTGGTATGAAACAGG	93	5	Sub	N/A
386	TTTATATGTAAGAGAGTTTGTATACAATGAAATAGTATATGTGTAACAGGTTGCTGCTTGGAAAGACAAGGATGGGGATTGGTATGAAACAGG	TTTATATGTAAGAGAGTTTGTGTACAATGAAACAGTGTATGTGTAACAGGTTGCTGCTTGGAAAGACAAGGATGGGGATTGGTATGAAACAGG	93	5	Sub	N/A
387	TTTATATGTAAGAGAGTTTGTATACAATGAAATAGTATATGTGTAACAGGTTGCTGCTTGGAAAGACAAGGATGGGGATTGGTATGAAACAGG	TTTATATGTAAGAGAGTTTGTATACAATGAAATAGTATATGTGTAATAGGTTGCTGCTTGGAAAGACGAGGATGGGGATTCGTATGAAACAGG	93	5	Sub	N/A
388	TTTATATGTAAGAGAGTTTGTATACAATGAAATAGTATATGTGTAACAGGTTGCTGCTTGGAAAGACAAGGATGGGGATTGGTATGAAACAGG	TTTATATGTAAGAGAGTTTGTATACAATGAAATAGTATATGTGTAACGGGTTGCTGCTTGGAAAGATAAGGATGGGGATTGGTATGAAACAGG	93	5	Sub	N/A
389	TTTATATGTAAGAGAGTTTGTATACAATGAAATAGTATATGTGTAACAGGTTGCTGCTTGGAAAGACAAGGATGGGGATTGGTATGAAACAGG	TTTTTATGTAAGAGAGTTTGTATACAATGAAATAGTATATGTGTAATAGGTTGCTGCTTGGAAAGACAAGGATGGGGATTGGTATGAAACAGG	93	5	Sub	N/A
390	TTTATATGTAAGAGAGTTTGTATACAATGAAATAGTATATGTGTAACAGGTTGCTGCTTGGAAAGACAAGGATGGGGATTGGTATGAAACAGG	TTTATATGTAAGAGAGTTTGTATACAATGAAATAGTACATGTGTAATAGGTTGCTGCTTGGAAAGACAAGGATGGGGATTGGTATGAAACAGG	93	5	Sub	N/A
391	TTTATATGTAAGAGAGTTTGTATACAATGAAATAGTATATGTGTAACAGGTTGCTGCTTGGAAAGACAAGGATGGGGATTGGTATGAAACAGG	TTTATATGTAAGAGAGTTTGTATACAATGAAATAGTATATGTGTAATAGGTTGCTGCTTGGAAAGACAAGGATGGGGATTGGTATGAAGCAGG	93	5	Sub	N/A
392	TTTATATGTAAGAGAGTTTGTATACAATGAAATAGTATATGTGTAACAGGTTGCTGCTTGGAAAGACAAGGATGGGGATTGGTATGAAACAGG	TTTATATGTAAGAGAGTTTGTATACAATGAAATAGTATATGTGTAACAGGTTGCTCCCTGGAAAGACAAGGATGGGGATTGGTATGAAACAGG	93	5	Sub	N/A
393	TTTATATGTAAGAGAGTTTGTATACAATGAAATAGTATATGTGTAACAGGTTGCTGCTTGGAAAGACAAGGATGGGGATTGGTATGAAACAGG	TTTATATGTAAGAGAGTTTGTATACAATGAAATAGTATATGTGTAACAGGTTGCTGCTTGGAAAGACAAGGATAGGGATTGGTATGGAACAGG	93	5	Sub	N/A
394	TTTATATGTAAGAGAGTTTGTATACAATGAAATAGTATATGTGTAACAGGTTGCTGCTTGGAAAGACAAGGATGGGGATTGGTATGAAACAGG	TTTATATGTAAGAGAGTTTGTATACAATGAAATAGTATATGTGTAACTGGTTGCTGCTTGGAAAGACAAGGATGGGGATTGGTATGAAACACG	93	5	Sub	N/A
395	TTTATATGTAAGAGAGTTTGTATACAATGAAATAGTATATGTGTAACAGGTTGCTGCTTGGAAAGACAAGGATGGGGATTGGTATGAAACAGG	TTTATATGTAAGAGAGTTTGTATACAATGAAATAGTGTATGTGTAACGGGTTGCTGCTTGGAAAGAC----ATGGGGATTGGTATGAAACAGG	89	5	del	N/A
396	TTTATATGTAAGAGAGTTTGTATACAATGAAATAGTATATGTGTAACAGGTTGCTGCTTGGAAAGACAAGGATGGGGATTGGTATGAAACAGG	TTTATATGTAAGAGAGTTTGTATACAA-GAAATAGTATATGTGTAACAGGTTGCTGCTTGGAAAGACAAGGATGGGGATTGGTATGAAACAGG	92	5	del	N/A
397	TTTATATGTAAGAGAGTTTGTATACAATGAAATAGTATATGTGTAACAGGTTGCTGCTTGGAAAGACAAGGATGGGGATTGGTATGAAACAGG	TTTATATGTAAGAGAGTTTGTATACAATGAAATAGTGTAAGTGTAACAGGTTGTTGCTTGAAAAGACAAGGATGGGGATTGGTATGAAACAGG	93	5	Sub	N/A
398	TTTATATGTAAGAGAGTTTGTATACAATGAAATAGTATATGTGTAACAGGTTGCTGCTTGGAAAGACAAGGATGGGGATTGGTATGAAACAGG	TTTATATGTAAGAGAGTTTGTATACAATGAAATAGTATATGTGTAACAGGTTGCTGCTTGGAAAGACAAAGATGGGGATTAGTATGAAACAGG	93	5	Sub	N/A
399	TTTATATGTAAGAGAGTTTGTATACAATGAAATAGTATATGTGTAACAGGTTGCTGCTTGGAAAGACAAGGATGGGGATTGGTATGAAACAGG	TTTATATGTAAGAGAGTTTGTATACAATGAAATAGTATATGTGTAACAGGTTGCTGCTTGGAAAGATAAGGATGGGGGTTGGTATGAAACAGG	93	5	Sub	N/A
400	TTTATATGTAAGAGAGTTTGTATACAATGAAATAGTATATGTGTAACAGGTTGCTGCTTGGAAAGACAAGGATGGGGATTGGTATGAAACAGG	TTTATATGTAAGAGAGTTTGTATACAATGAAATAGTATATGTGTAACAGGTTGCGGCATGGAAAGACAAGGATGGGGATTGGTATGAAACAGG	93	5	Sub	N/A
401	TTTATATGTAAGAGAGTTTGTATACAATGAAATAGTATATGTGTAACAGGTTGCTGCTTGGAAAGACAAGGATGGGGATTGGTATGAAACAGG	TTTATATGTAAGAGAGTTTGTATACAATGAAATAGTATATGTGTAACAGGTTGCTGCTTGGAAAGAC----ATGGGGCTTGGTATGAAACAGG	89	5	del	N/A
402	TTTATATGTAAGAGAGTTTGTATACAATGAAATAGTATATGTGTAACAGGTTGCTGCTTGGAAAGACAAGGATGGGGATTGGTATGAAACAGG	TTTATATGTAAGAGAGTTTGTATACAATGAAATAGTATATGTGTAACAGGTTCCTGCTTGGAAAGACCAGGATGGGGATTAGTATGAAACAGG	93	5	Sub	N/A
403	TTTATATGTAAGAGAGTTTGTATACAATGAAATAGTATATGTGTAACAGGTTGCTGCTTGGAAAGACAAGGAT------------------GGGGATTGGTATGAAACAGG	TTTATATGTAAGAGAGTTTGTATACAATGAAATAGTATATGTGTAACAGGTTGCTGCTTGGAAAGACAAGGATGGGGATTAGTATGAAACAGGGGATTGGTATGAAACAGG	111	5	Ins	N/A
404	TTTATATGTAAGAGAGTTTGTATACAATGAAATAGTATATGTGTAACAGGTTGCTGCTTGGAAAGACAAGGATGGGGATTGGTATGAAACAGG	TTTATATGTAAGAGAGTTTGTATACAATGAAATAGTATATGTGTATTAGGTTGCTGCTTGGAAAGACAAGGATGGGGATTGGTATGAAACAGG	93	5	Sub	N/A
405	TTTATATGTAAGAGAGTTTGTATACAATGAAATAGTATATGTGTAACAGGTTGCTGCTTGGAAAGACAAGGATGGGGATTGGTATGAAACAGG	TTTATATGTAAGAGAGATTGTATACAATGAAATAGTATATGTGTAATAGGTTGCTGCTTGGAAAGACAAGGATGGGGATTGGTATGAAACAGG	93	5	Sub	N/A
406	TTTATATGTAAGAGAGTTTGTATACAATGAAATAGTATATGTGTAACAGGTTGCTGCTTGGAAAGACAAGGATGGGGATTGGTATGAAACAGG	TTTATATGTAAGAGAGTTTGTATACAATGAAATAGTATATGTGTTATAGGTTGCTTCTTGGAAAGACAAGGATGGGGATTGGTATGACACAGG	93	5	Sub	N/A
407	TTTATATGTAAGAGAGTTTGTATACAATGAAATAGTATATGTGTAACAGGTTGCTGCTTGGAAAGACAAGGATGGGGATTGGTATGAAACAGG	TTTATATGTAAGAGAGTTTGTATACAATGAAATAGTATATGTGTAACAGGTTGCTGCTTGTAAAGACAAGGATGGGGATTAGTATGAAACAGG	93	5	Sub	N/A
408	TTTATATGTAAGAGAGTTTGTATACAATGAAATAGTATATGTGTAACAGGTTGCTGCTTGGAAAGACAAGGATGGGGATTGGTATGAAACAGG	TTTATATGTAAGAGAGTTTGTATACAATGAAATAGTATATGTGTAACAGGTTGCTGCTTGGAAAGAC----ATGGGGATTGGTATGAAAAAGG	89	5	del	N/A
409	TTTATATGTAAGAGAGTTTGTATACAATGAAATAGTATATGTGTAACAGGTTGCTGCTTGGAAAGACAAGGATGGGGATTGGTATGAAACAGG	TTTATATGTAAGAGAGTTTGTATACAATGAAATAGTATATGTGTGACAGGTTGCTGCTTGGAGAGACAAGGATGGGGATTGGTATGAAACAGG	93	5	Sub	N/A
410	TTTATATGTAAGAGAGTTTGTATACAATGAAATAGTATATGTGTAACAGGTTGCTGCTTGGAAAGACAAGGATGGGGATTGGTATGAAACAGG	TTTATATGTAAGAGAGTTTGTATACAATGAAATAGTATATGTGTAATAGGTTGCTGCTTGGAAAGAAAAGGATGGGGATTGGTATGATACAGG	93	5	Sub	N/A
411	TTTATATGTAAGAGAGTTTGTATACAATGAAATAGTATATGTGTAACAGGTTGCTGCTTGGAAAGACAAGGATGGGGATTGGTATGAAACAGG	TTTATATGTAAGAGAGTTTGTATACAATGAAATAGTATATGTGTAACAGGTTGCTGCATGGAAAGACTAGGATGGGGATTGGTATGAAACAGG	93	5	Sub	N/A
412	TTTATATGTAAGAGAGTTTGTATACAATGAAATAGTATATGTGTAACAGGTTGCTGCTTGGAAAGACAAGGATGGGGATTGGTATGAAACAGG	TTTATATGTAAGAGAGTTTGTATACAATGAAATAGTATATGTGTAACAGGTTGCTGCTTGGAAAGACTAGGATGGGGATTGATATGAAACAGG	93	5	Sub	N/A
413	TTTATATGTAAGAGAGTTTGTATACAATGAAATAGTATATGTGTAACAGGTTGCTGCTTGGAAAGACAAGGATGGGGATTGGTATGAAACAGG	TTTATATGTAAGAGAGTTTGTATACAATGAAATAGTATATGTGTAACAGGTTGCTGCTTGGAACGACAAGGACGGGGATTGGTATGAAACAGG	93	5	Sub	N/A
414	TTTATATGTAAGAGAGTTTGTATACAATGAAATAGTATATGTGTAACAGGTTGCTGCTTGGAAAGACAAGGATGGGGATTGGTATGAAACAGG	TTTATATGTAAGAGAGTTTGTATACAATGAAATAGTATATGTGTAACCGGTTGCTGCCTGGAAAGACAAGGATGGGGATTGGTATGAAACAGG	93	5	Sub	N/A
415	TTTATATGTAAGAGAGTTTGTATACAATGAAATAGTATATGTGTAACAGGTTGCTGCTTGGAAAGACAAGGATGGGGATTGGTATGAAACAGG	TTTATATGTAAGAGAGTTTGTATACAATGAAATAGTATATGTGTAACTGGTTGCTGCTTGGAAAGATTAGGATGGGGATTGCTATGAAACAGG	93	5	Sub	N/A
416	TTTATATGTAAGAGAGTTTGTATACAATGAAATAGTATATGTGTAACAGGTTGCTGCTTGGAAAGACAAGGATGGGGATTGGTATGAAACAGG	TTTATATGTAAGAGAGTTTGTATACAATGAAATAGTATATGTGTAACAGGTTGCTGCTTGGAAAGAC----AGGGGGATTGGTATGAAACAGG	89	5	del	N/A
417	TTTATATGTAAGAGAGTTTGTATACAATGAAATAGTATATGTGTAACAGGTTGCTGCTTGGAAAGACAAGGATGGGGATTGGTATGAAACAGG	TTTATATGTAAGAGAGTTTGTATACAATGAAACAGTATATGTGTAACAGGTTGCTGCTTGGAAAGAC----ATGGGGATTGGTATGAAACAGG	89	5	del	N/A
418	TTTATATGTAAGAGAGTTTGTATACAATGAAATAGTATATGTGTAACAGGTTGCTGCTTGGAAAGACAAGGATGGGGATTGGTATGAAACAGG	ATTATATGTAAGAGAGTTTGTATACAATGAAATAGTATATGTGTAACAGGTTGCTGCTTGGAAAGACAAGGATGGGGATTGGTATGAAACAGG	93	5	Sub	N/A
419	TTTATATGTAAGAGAGTTTGTATACAATGAAATAGTATATGTGTAACAGGTTGCTGCTTGGAAAGACAAGGATGGGGATTGGTATGAAACAGG	TTTATATGTAAGAGAGTTTGTATACAATGAAATAGTATATGTGTAACAGGTTGCTGCTTGGAAAGAC----ATGGGGATTGGTATGAGACAGG	89	5	del	N/A
420	TTTATATGTAAGAGAGTTTGTATACAATGAAATAGTATATGTGTAACAGGTTGCTGCTTGGAAAGACAAGGATGGGGATTGGTATGAAACAGG	TTTATATGTAAGAGAGTTTGTATACAATGAAATAGTATATGTGTAACGGGTTGCTGCTTGGAAAGACAAGGATGGGGATTGGAATGAAACAGG	93	5	Sub	N/A
421	TTTATATGTAAGAGAGTTTGTATACAATGAAATAGTATATGTGTAACAGGTTGCTGCTTGGAAAGACAAGGATGGGGATTGGTATGAAACAGG	TTTATATGTAAGAGAGTTTGTATACAATGAAATAGTATATGTGTAACAGGTTGCTGCTTGGAAGGACAAGGACGGGGATTGGTATGAAACAGG	93	5	Sub	N/A
422	TTTATATGTAAGAGAGTTTGTATACAATGAAATAGTATATGTGTAACAGGTTGCTGCTTGGAAAGACAAGGATGGGGATTGGTATGAAACAGG	TTTATATGTAACAGAGTTT-TATATAATGAAATAGTGTATGTGTAACAGGTTGCTGCTTGGAAAGACAAGGATGGGGATTGGTATGAAACAGG	92	5	del	N/A
423	TTTATATGTAAGAGAGTTTGTATACAATGAAATAGTATATGTGTAACAGGTTGCTGCTTGGAAAGACAAGGATGGGGATTGGTATGAAACAGG	TTTATATGTAAGAGAGTTTGTATACAATGAAATAGTATATGTGTAACAGGTTGCTGTTTGGAAAGACGAGGATGGGGATTTGTATGAAACAGG	93	5	Sub	N/A
424	TTTATATGTAAGAGAGTTTGTATACAATGAAATAGTATATGTGTAACAGGTTGCTGCTTGGAAAGACAAGGATGGGGATTGGTATGAAACAGG	TTTATATGTAAGAGAGTTTGTATACAATGAAATAGTATATGTGTAACAGGGTGCTGCTTGGAAAGAAAAGGATGGGGATTGGTATGAAACAGG	93	5	Sub	N/A
425	TTTATATGTAAGAGAGTTTGTATACAATGAAATAGTATATGTGTAACAGGTTGCTGCTTGGAAAGACAAGGATGGGGATTGGTATGAAACAGG	TTTATATGTAAGAGAGTTTGTATACAATGAAATAGTAGATGTGTAATAGGTTGCTGCTTGGAAAGACAAGGATGGGGATTGGTATGAAACAGG	93	5	Sub	N/A
426	TTTATATGTAAGAGAGTTTGTATACAATGAAATAGTATATGTGTAACAGGTTGCTGCTTGGAAAGACAAGGATGGGGATTGGTATGAAACAGG	TTTATATGTAAGAGAGTTTGTATCCAATGAAATAGTATATGTGTAACAGGTTGCTGCTTGGAAAGACAAGGATGGGGATTGGTATGAAACAGG	93	5	Sub	N/A
427	TTTATATGTAAGAGAGTTTGTATACAATGAAATAGTATATGTGTAACAGGTTGCTGCTTGGAAAGACAAGGATGGGGATTGGTATGAAACAGG	TTTATATGTAAGAGAGTTTGTATACAATGATATAGTATATGTGTAACAGGTTGCTGCTTGGAAAGACAAGGATGGGGATTGGTATGAAACAGG	93	5	Sub	N/A
428	TTTATATGTAAGAGAGTTTGTATACAATGAAATAGTATATGTGTAACAGGTTGCTGCTTGGAAAGACAAGGATGGGGATTGGTATGAAACAGG	TTTATATGTAAGAGAGTTTGTATACAATGAAATAGTATATGTGTAATAGGTTGCTGCTTGGAAAGACCAGGATGGGGATTTGTATGAAACAGG	93	5	Sub	N/A
429	TTTATATGTAAGAGAGTTTGTATACAATGAAATAGTATATGTGTAACAGGTTGCTGCTTGGAAAGACAAGGATGGGGATTGGTATGAAACAGG	TTTATATGTAAGAGAGTTTGTATACAATGAAATAGTATATGTGTAACCGGTTGCTGCTTGGAAAGACACGGATGGGGCTTGGTATGAAACAGG	93	5	Sub	N/A
430	TTTATATGTAAGAGAGTTTGTATACAATGAAATAGTATATGTGTAACAGGTTGCTGCTTGGAAAGACAAGGATGGGGATTGGTATGAAACAGG	TTTATATGTAAGAGAGTTTGTATAAAATGAAATAGTATATGTGTAATAGGTTGCTGCTTGGAAAGACAAGGATGGGGATTGGTATGAAACAGG	93	5	Sub	N/A
431	TTTATATGTAAGAGAGTTTGTATACAATGAAATAGTATATGTGTAACAGGTTGCTGCTTGGAAAGACAAGGATGGGGATTGGTATGAAACAGG	TTTATATGTAAGAGAGTTTGTATACAATGAAATAGTATATGTGTAACGGGTTGCTGCTGGGAAAGACAAGGATGGGGATTGGTATGAAACAGG	93	5	Sub	N/A
432	TTTATATGTAAGAGAGTTTGTATACAATGAAATAGTATATGTGTAACAGGTTGCTGCTTGGAAAGACAAGGATGGGGATTGGTATGAAACAGG	TTTATATGTAAGAGATTTTGTATACAATGAAATAGTATATGTGTAATAGGTTGCTGCTTGGAAAGACAAGGATGGGGATTGGTATGAAACAGG	93	5	Sub	N/A
433	TTTATATGTAAGAGAGTTTGTATACAATGAAATAGTATATGTGTAACAGGTTGCTGCTTGGAAAGACAAGGATGGGGATTGGTATGAAACAGG	TTTATATGTAAGAGAGTTTGTATACGATGAAATAGTATATGTGTAACAGGTTGCTGCTTGGAAAGACAAGGATGGGGATTAGTATGAAACAGG	93	5	Sub	N/A
434	TTTATATGTAAGAGAGTTTGTATACAATGAAATAGTATATGTGTAACAGGTTGCTGCTTGGAAAGACAAGGATGGGGATTGGTATGAAACAGG	TTTATATGTAAGAGAGTTTGTATACAATGAAATAGTATATGTGTAATAGGTTGGTGCTTGGAAAGACAAGGATGGGGATTGGTATGGAACAGG	93	5	Sub	N/A
435	TTTATATGTAAGAGAGTTTGTATACAATGAAATAGTATATGTGTAACAGGTTGCTGCTTGGAAAGACAAGGATGGGGATTGGTATGAAACAGG	TTTATATGTAAGAGAGTTTGTATACAATGAAATAGTATATGTGTAACAGGTTGCGGCTTGGAAAGACTAGGATGGGGATTGGTATGAAACAGG	93	5	Sub	N/A
436	TTTATATGTAAGAGAGTTTGTATACAATGAAATAGTATATGTGTAACAGGTTGCTGCTTGGAAAGACAAGGATGGGGATTGGTATGAAACAGG	TTTATATGTAAGAGAGTTTGTATACAATGAAATAGTATATGTGTAACAGGGTGCGGCTTGGAAAGACAAGGATGGGGATTGGTATGAAACAGG	93	5	Sub	N/A
437	TTTATATGTAAGAGAGTTTGTATACAATGAAATAGTATATGTGTAACAGGTTGCTGCTTGGAAAGACAAGGATGGGGATTGGTATGAAACAGG	TTTATATGTAAGAGAGTTTGTATACAATGAAATAGTATATGTGTAACAGGTTGCGGCTTGGAAAGACAAGGATGGGGATTGGTATGAAACATG	93	5	Sub	N/A
438	TTTATATGTAAGAGAGTTTGTATACAATGAAATAGTATATGTGTAACAGGTTGCTGCTTGGAAAGACAAGGATGGGGATTGGTATGAAACAGG	TTTATATGTAAGAGAGTTTGTATACAATGAAATAGTATATGTGTAACAGGTTGCGGCTTGGAAAGACAAGGATGGGGGTTGGTATGAAACAGG	93	5	Sub	N/A
439	TTTATATGTAAGAGAGTTTGTATACAATGAAATAGTATATGTGTAACAGGTTGCTGCTTGGAAAGACAAGGATGGGGATTGGTATGAAACAGG	TTTATATGTAAGAGAGTTTGTATACAATGAAATAGTATATGTGTAACAGGTTGCTGCATGGAAAGACAAGGATGGGGATTCGTATGAAACAGG	93	5	Sub	N/A
440	TTTATATGTAAGAGAGTTTGTATACAATGAAATAGTATATGTGTAACAGGTTGCTGCTTGGAAAGACAAGGATGGGGATTGGTATGAAACAGG	TTTATATGTAAGAGAGTTTGTATACAATGAAATAGTATATGTGTAACAGGTTGCTGCTTGGAAAGCCAAGGATGGGGATTGGTATGAAACACG	93	5	Sub	N/A
441	TTTATATGTAAGAGAGTTTGTATACAATGAAATAGTATATGTGTAACAGGTTGCTGCTTGGAAAGACAAGGATGGGGATTGGTATGAAACAGG	TTTATATGTAAGAGAGTTTGTATACAATGAAATAGTATATGTGTAATAGGTTGCTGCTTGGAAAGACAAGGATGGCGATTGGTATGAAACAGG	93	5	Sub	N/A
442	TTTATATGTAAGAGAGTTTGTATACAATGAAATAGTATATGTGTAACAGGTTGCTGCTTGGAAAGACAAGGATGGGGATTGGTATGAAACAGG	TTTATATGTAAGAGAGTTTGTATACAAGGAAATAGTATATGTGTAACAGGTTGCTGCTTGGAAAGACAAGGATGGGGATTAGTATGAAACAGG	93	5	Sub	N/A
443	TTTATATGTAAGAGAGTTTGTATACAATGAAATAGTATATGTGTAACAGGTTGCTGCTTGGAAAGACAAGGATGGGGATTGGTATGAAACAGG	TTTATATGTAAGAGAGTTTGTATACAATGAAATAGTATATGTGTAACAGGTTGTTGCTTGGAAAGACAAGGATGGGGATTAGTATGAAACAGG	93	5	Sub	N/A
444	TTTATATGTAAGAGAGTTTGTATACAATGAAATAGTATATGTGTAACAGGTTGCTGCTTGGAAAGACAAGGATGGGGATTGGTATGAAACAGG	TTTATATGTAAGAGAGTTTGTATACAATGAAATGATGTAGGTGTAACAGGTTGCTACTTGAAAAGACAAGGATGGGGATTGGTATGAAACAGG	93	5	Sub	N/A
445	TTTATATGTAAGAGAGTTTGTATACAATGAAATAGTATATGTGTAACAGGTTGCTGCTTGGAAAGACAAGGATGGGGATTGGTATGAAACAGG	TTTATATGAAAGAGAGTTTGTATACAATGAAATAGTATATGTGTAATAGGTTGCTGCTTGGAAAGACAAGGATGGGGATTGGTATGAAACAGG	93	5	Sub	N/A
446	TTTATATGTAAGAGAGTTTGTATACAATGAAATAGTATATGTGTAACAGGTTGCTGCTTGGAAAGACAAGGATGGGGATTGGTATGAAACAGG	TTTATATGTAAGAGAGTTTGTATACAATGAAATAGTATATGTGTAATAGGTTGCTGCTTGGAAAGACAAGGATGGAGATTGGTATGAAACAGG	93	5	Sub	N/A
447	TTTATATGTAAGAGAGTTTGTATACAATGAAATAGTATATGTGTAACAGGTTGCTGCTTGGAAAGACAAGGATGGGGATTGGTATGAAACAGG	TTTATATGTAAGAGAGTTTGTATACAATGAAATAGTATATGTGTAACAGGTTGCTGCTTGGGGAGACAAGGATGGGGATTGGTATGAAACAGG	93	5	Sub	N/A
448	TTTATATGTAAGAGAGTTTGTATACAATGAAATAGTATATGTGTAACAGGTTGCTGCTTGGAAAGACAAGGATGGGGATTGGTATGAAACAGG	TTTATATGTAAGAGAGTTTGTATACAATGAAATAGTATATGTGTAATAGGTTGCTGCTTGGAAAGAGAAGGATGGGGATTAGTATGAAACAGG	93	5	Sub	N/A
449	TTTATATGTAAGAGAGTTTGTATACAATGAAATAGTATATGTGTAACAGGTTGCTGCTTGGAAAGACAAGGATGGGGATTGGTATGAAACAGG	TTTATATGTAAGAGAGTTTGTATACAATGAAATAGTATATGTGTAACAGGTTTCTGCTTGGAAAGACAAGGATGGGGATTGTTATGAAACAGG	93	5	Sub	N/A
450	TTTATATGTAAGAGAGTTTGTATACAATGAAATAGTATATGTGTAACAGGTTGCTGCTTGGAAAGACAAGGATGGGGATTGGTATGAAACAGG	TTTATATGTAAGAGAGTTTGTATACAATGAAATAGTATATGTGTAATTGGTTGCTGCTTGGAAAGACTAGGATGGGGATTGGTATGAAACAGG	93	5	Sub	N/A
451	TTTATATGTAAGAGAGTTTGTATACAATGAAATAGTATATGTGTAACAGGTTGCTGCTTGGAAAGACAAGGATGGGGATTGGTATGAAACAGG	TTTATATGTAAGAGAGTTTGTATACAATGAAATAGTATATGTGTAACAGGTTGCTGCTTGGAAAGATTTGGATGGGGATTGGTATGAAACAGG	93	5	Sub	N/A
452	TTTATATGTAAGAGAGTTTGTATACAATGAAATAGTATATGTGTAACAGGTTGCTGCTTGGAAAGACAAGGATGGGGATTGGTATGAAACAGG	TTTATATGTAAGAGAGTTTGTATACAATGAAATAGTATATGTGTAACAGGTTGCTGCTTGGAAAGAGAAGGATGGGGATTGATATGAAACAGG	93	5	Sub	N/A
453	TTTATATGTAAGAGAGTTTGTATACAATGAAATAGTATATGTGTAACAGGTTGCTGCTTGGAAAGACAAGGATGGGGATTGGTATGAAACAGG	TTTATATGTAAGAGAGTTTGTATACAATGCAATAGTATATGTGTAACAGGTTGCTGCTTGGAAAGACAAGGATGGGGATTGGTATGAAACAGG	93	5	Sub	N/A
454	TTTATATGTAAGAGAGTTTGTATACAATGAAATAGTATATGTGTAACAGGTTGCTGCTTGGAAAGACAAGGATGGGGATTGGTATGAAACAGG	TTTATATGTAAGAGAGTTTGTATACAATGAAATAGTATATGTGTAACTGGTTGCTGCTTGGAAAGACTTGGATGGGGATTGGTATGAAACAGG	93	5	Sub	N/A
455	TTTATATGTAAGAGAGTTTGTATACAATGAAATAGTATATGTGTAACAGGTTGCTGCTTGGAAAGACAAGGATGGGGATTGGTATGAAACAGG	TTTATATGTAAGAGAGTTTGTATACAATGAAATAGTATATGTGTAACAGGTTGCTGCTTGGAAAGACAAAGATGGGGATTCGTATGAAACAGG	93	5	Sub	N/A
456	TTTATATGTAAGAGAGTTTGTATACAATGAAATAGTATATGTGTAACAGGTTGCTGCTTGGAAAGACAAGGATGGGGATTGGTATGAAACAGG	TTTATATGTAAGAGAGTTTGTATACAATGAAATAGTATATGTGTAATTGGTTGCTGCTTGGAAAGACAAGGATGGGGGTTGGTATGAAACAGG	93	5	Sub	N/A
457	TTTATATGTAAGAGAGTTTGTATACAATGAAATAGTATATGTGTAACAGGTTGCTGCTTGGAAAGACAAGGATGGGGATTGGTATGAAACAGG	TTTATATGTAAGAGAGTTTGTATACAATGAAATAGTATATGTGTAACTGGTTGCGGCTTGGAAAGATTAGGATGGGGGTTGGTATGAAACAGG	93	5	Sub	N/A
458	TTTATATGTAAGAGAGTTTGTATACAATGAAATAGTATATGTGTAACAGGTTGCTGCT-----------------------TGGAA-----------AGACAAGGATGGGGATTGGTATGAAACAGG	TTTATATGTAAGAGAGTTTGTATACAATGAAATAGTATATGTGTAACAGGTTGCTGCTGGACATACAAAACATTATAAGTATGGAAATGCTTTTCCTAGACA-----GGGGATTGGTATGAAACAGG	122	5	Ins	N/A
459	TTTATATGTAAGAGAGTTTGTATACAATGAAATAGTATATGTGTAACAGGTTGCTGCTTGGAAAGACAAGGATGGGGATTGGTATGAAACAGG	TTTATATGTAAGAGAGTTTGTATACAATGAAATAGTATATGTGTAACAGGTTGATGCTTGGAAAGACAAGGATGGGGATTGCTATGAAACAGG	93	5	Sub	N/A
460	TTTATATGTAAGAGAGTTTGTATACAATGAAATAGTATATGTGTAACAGGTTGCTGCTTGGAAAGACAAGGATGGGGATTGGTATGAAACAGG	TTTATATGTAAGAGAGTTTGTATACAATGAAATAGTATATGTGTAACAGGTTGCTGCTTGGCAAGACAAGGATGGGGATTGGTATGAAACACG	93	5	Sub	N/A
461	TTTATATGTAAGAGAGTTTGTATACAATGAAATAGTATATGTGTAACAGGTTGCTGCTTGGAAAGACAAGGATGGGGATTGGTATGAAACAGG	TTTATATGTAAGAGCGTTTGTATACAATGAAATAGTATATGTGTAACAGGTTGCTGCTTGGAAAGACAAGGATGGGGATTCGTATGAAACAGG	93	5	Sub	N/A
462	TTTATATGTAAGAGAGTTTGTATACAATGAAATAGTATATGTGTAACAGGTTGCTGCTTGGAAAGACAAGGATGGGGATTGGTATGAAACAGG	TTTATATGTAAGAGAGTTTGTATACAATGAAATAGTATATGTGTAACAGGTTGCGGCTTGGAAAGACAAGGATGGGGATTTGTATGAAACAGG	93	5	Sub	N/A
463	TTTATATGTAAGAGAGTTTGTATACAATGAAATAGTATATGTGTAACAGGTTGCTGCTTGGAAAGACAAGGATGGGGATTGGTATGAAACAGG	TTTATATGTAAGAGAGTTTGTATACAATGAAATAGTATATGTGTAACAGGTTGCTGCTTGGAAAGAC----ATGGGGATTGATATGAAACAGG	89	5	del	N/A
464	TTTATATGTAAGAGAGTTTGTATACAATGAAATAGTATATGTGTAACAGGTTGCTGCTTGGAAAGACAAGGATGGGGATTGGTATGAAACAGG	TTTATATGTAAGAGAGTTTGTCTACAATGAAATAGTATATGTGTAATAGGTTGCTGCTTGGAAAGACAAGGATGGGGATTGGTATGAAACAGG	93	5	Sub	N/A
465	TTTATATGTAAGAGAGTTTGTATACAATGAAATAGTATATGTGTAACAGGTTGCTGCTTGGAAAGACAAGGATGGGGATTGGTATGAAACAGG	TTTATATGTAAGAGAGTTTGTATACAATGAAATAGTATATGTGTAACAGGTGGCTGCTTGGAAAGACAAGGATGGGGATTGGGATGAAACAGG	93	5	Sub	N/A
466	TTTATATGTAAGAGAGTTTGTATACAATGAAATAGTATATGTGTAACAGGTTGCTGCTTGGAAAGACAAGGATGGGGATTGGTATGAAACAGG	TTTATATGTAAGAGAGTTTGTATACAATGAACTAGTATATGTGTAATAGGTTGCTGCTTGGAAAGACAAGGATGGGGATTGGTATGAAACAGG	93	5	Sub	N/A
467	TTTATATGTAAGAGAGTTTGTATACAATGAAATAGTATATGTGTAACAGGTTGCTGCTTGGAAAGACAAGGATGGGGATTGGTATGAAACAGG	TTTATATGTAAGAGAGTTTGTATACAATGAAATAGTATATGTGTAACAGGTTTCTGCTTGGAAAGACAAGGATGGGGATTGGTATGAAACAGT	93	5	Sub	N/A
468	TTTATATGTAAGAGAGTTTGTATACAATGAAATAGTATATGTGTAACAGGTTGCTGCTTGGAAAGACAAGGATGGGGATTGGTATGAAACAGG	TTTATATGTAAGAGAGTTTGTATACAATGAAATAGTATATGTGTAACAGGTTCCTGCTTGGAAAGAACAGGATGGGGATTAGTATGAAACAGG	93	5	Sub	N/A
469	TTTATATGTAAGAGAGTTTGTATACAATGAAATAGTATATGTGTAACAGGTTGCTGCTTGGAAAGACAAGGATGGGGATTGGTATGAAACAGG	TTTATATGTAAGAGAGTTTGTATACAATGAAACAGTGTATGTGTAACAGGTTGCTGCTTGGAAAGAC----ATGGGGATTAGTATGAAACAGG	89	5	del	N/A
470	TTTATATGTAAGAGAGTTTGTATACAATGAAATAGTATATGTGTAACAGGTTGCTGCTTGGAAAGACAAGGATGGGGATTGGTATGAAACAGG	TTTATATGTAAGAGAGTTTGTATATAATGAAA-AGTGTATGTGTAACAGGTTGCTGCTTGGAAAGACAAGGATGGGGATTCGTATGAAACAGG	92	5	del	N/A
471	TTTATATGTAAGAGAGTTTGTATACAATGAAATAGTATATGTGTAACAGGTTGCTGCTTGGAAAGACAAGGATGGGGATTGGTATGAAACAGG	TTTATATGTAAGAGAGTTTGTATACAATGAAATAGTATATGTGTAACAGGTTGCGGCTTGGAAAGACAAGGATGGGGATTGGTATGACACAGG	93	5	Sub	N/A
472	TTTATATGTAAGAGAGTTTGTATACAATGAAATAGTATATGTGTAACAGGTTGCTGCTTGGAAAGACAAGGATGGGGATTGGTATGAAACAGG	TTTATATGTAAGAGAGTTTGTATACAATGAAATAGTATATGTGTAATAGGTTGCTGCTTGGAAAGACAATGATGGGGACTGGTATGAAACAGG	93	5	Sub	N/A
473	TTTATATGTAAGAGAGTTTGTATACAATGAAATAGTATATGTGTAACAGGTTGCTGCTTGGAAAGACAAGGATGGGGATTGGTATGAAACAGG	TTTATATGTAAGAGAGTTTGTATACAATGAAATAGTATATGTGTAATCGGTTGCTGCTTGGAAAGACAAGGATGGGGATTGGTATGACACAGG	93	5	Sub	N/A
474	TTTATATGTAAGAGAGTTTGTATACAATGAAATAGTATATGTGTAACAGGTTGCTGCTTGGAAAGACAAGGATGGGGATTGGTATGAAACAGG	TTTATATGTAAGAGAGTTTGTATACAATGAAATAGTATATGTGTAACAGGTTGCTGCTTGGAAAGACAATAATGGGGATTGGTATGAAACAGG	93	5	Sub	N/A
475	TTTATATGTAAGAGAGTTTGTATACAATGAAATAGTATATGTGTAACAGGTTGCTGCTTGGAAAGACAAGGATGGGGATTGGTATGAAACAGG	TTTATATGTAAGAGAGTTTGTATACAATGAAATAGTATATGTGTAACAGGTTGCTGCTTGGAAAGACAAGCATGGGGATTGGTATGACACAGG	93	5	Sub	N/A
476	TTTATATGTAAGAGAGTTTGTATACAATGAAATAGTATATGTGTAACAGGTTGCTGCTTGGAAAGACAAGGATGGGGATTGGTATGAAACAGG	TTTATATGTAAGAGAGTTTGTATACAATGAAATAGTATATGTGTAATGGGTTGCTGCTTGGAAAGACAAGGATGGGGATTAGTATGAAACAGG	93	5	Sub	N/A
477	TTTATATGTAAGAGAGTTTGTATACAATGAAATAGTATATGTGTAACAGGTTGCTGCTTGGAAAGACAAGGATGGGGATTGGTATGAAACAGG	TTTATATGTAAGAGAGTTTGTATACAATGAAATAGTATATGTGTAACAGGTTGTTGCTTGGAAAGACAAGGATGGGGATTCGTATGAAACAGG	93	5	Sub	N/A
478	TTTATATGTAAGAGAGTTTGTATACAATGAAATAGTATATGTGTAACAGGTTGCTGCTTGGAAAGACAAGGATGGGGATTGGTATGAAACAGG	TTTATATGTAAGAGCGTTTGTATACAATGAAATAGTATATGTGTAACCGGTTGCTGCTTGGAAAGACAAGGATGGGGATTGGTATGAAACAGG	93	5	Sub	N/A
479	TTTATATGTAAGAGAGTTTGTATACAATGAAATAGTATATGTGTAACAGGTTGCTGCTTGGAAAGACAAGGATGGGGATTGGTATGAAACAGG	TTTATATGTAAGAGAGTTTGTATACAATGAAATAGTATATGTGTAACCGGTTGCGGCTTGGAAAGACAAGGATGGGGATTGGTATGAAACAGG	93	5	Sub	N/A
480	TTTATATGTAAGAGAGTTTGTATACAATGAAATAGTATATGTGTAACAGGTTGCTGCTTGGAAAGACAAGGATGGGGATTGGTATGAAACAGG	TTTATATGTAAGAGAGTTTGTATACAATGAAATAGTATATGTGTAACAGGTTGCTGCTTGGAAAGATAAGGATGGGGATTGGTATGAAACACG	93	5	Sub	N/A
481	TTTATATGTAAGAGAGTTTGTATACAATGAAATAGTATATGTGTAACAGGTTGCTGCTTGGAAAGACAAGGATGGGGATTGGTATGAAACAGG	TTTATATGTAAGAGAGTTTGTATACAATGAAATAGTATATGTGTAACAGGTTGCTGCTTGGACAGACAAGGATGGGGATTGGTATGAAACAAG	93	5	Sub	N/A
482	TTTATATGTAAGAGAGTTTGTATACAATGAAATAGTATATGTGTAACAGGTTGCTGCTTGGAAAGACAAGGATGGGGATTGGTATGAAACAGG	TTTATATGTAAGAGAGTTTGTATACAATGAAATAGTATATGTGTAACAGGTTGCTGCTTGGACAGACACGGATGGGGATTGGTATGAAACAAG	93	5	Sub	N/A
483	TTTATATGTAAGAGAGTTTGTATACAATGAAATAGTATATGTGTAACAGGTTGCTGCTTGGAAAGACAAGGATGGGGATTGGTATGAAACAGG	TTTATATGTAAGAGAGTTTGTATACAATGAAATAGTATATGTGTAACAGGTTGCTGCTTGGAGAGACACGGATGGGGATTGGTATGAAACATG	93	5	Sub	N/A
484	TTTATATGTAAGAGAGTTTGTATACAATGAAATAGTATATGTGTAACAGGTTGCTGCTTGGAAAGACAAGGATGGGGATTGGTATGAAACAGG	TTTATATGTAAGAGAGTTTGTATACAATGAAATAGTATATGTGTAACAGGTTGCTGCTTGGAAAAACAAGGATGGGGATTCGTATGAAACAGG	93	5	Sub	N/A
485	TTTATATGTAAGAGAGTTTGTATACAATGAAATAGTATATGTGTAACAGGTTGCTGCTTGGAAAGACAAGGATGGGGATTGGTATGAAACAGG	TTTATATGTAAGAGAGTTTGTATACAATGAAATAGTGTATGTGTAACGGGTTGCTGCTTGGAAAGACAAGGATGGGGATTTGTATGAAACAGG	93	5	Sub	N/A
486	TTTATATGTAAGAGAGTTTGTATACAATGAAATAGTATATGTGTAACAGGTTGCTGCTTGGAAAGACAAGGATGGGGATTGGTATGAAACAGG	TTTATATGTAAGAGAGTTTGTATACAATGAAATAGTATATGTTTAACAGGTTGCTGCTTGGAAAGACAAGGATGGGGATTTGTATGAAACAGG	93	5	Sub	N/A
487	TTTATATGTAAGAGAGTTTGTATACAATGAAATAGTATATGTGTAACAGGTTGCTGCTTGGAAAGACAAGGATGGGGATTGGTATGAAACAGG	TTTATATGTAAGAGAGTTTGTATACAATGAAATAGTATATGTGTAACAGGTTGCTGCTTGGAAAGAAAAGGATGGGGATTGGTACGAAACAGG	93	5	Sub	N/A
488	TTTATATGTAAGAGAGTTTGTATACAATGAAATAGTATATGTGTAACAGGTTGCTGCTTGGAAAGACAAGGATGGGGATTGGTATGAAACAGG	TTTATATGTAAGAGAGTTTGTATATAATGAAACAGTGTATGTGTAACAGGTTGCTGATTGGAAAGAC----ATGGGGATTGGTATGAAACAGG	89	5	del	N/A
489	TTTATATGTAAGAGAGTTTGTATACAATGAAATAGTATATGTGTAACAGGTTGCTGCTTGGAAAGACAAGGATGGGGATTGGTATGAAACAGG	TTTATATGTAAGAGAGTTTGTATACAATGAAATAGTATATGTGTAACTGGTTGCGGCTTGGAAAGATTTGGATGGGGGTTGGTATGAGACAGG	93	5	Sub	N/A
490	TTTATATGTAAGAGAGTTTGTATACAATGAAATAGTATATGTGTAACAGGTTGCTGCTTGGAAAGACAAGGATGGGGATTGGTATGAAACAGG	TTTATATGTAAGAGAGTTTGTATACAATGAAATAGTATATGTGTAACAGGTTGCTGCTTGGGAAGCCAAGGATGGGGATTGGTATGAAACAGG	93	5	Sub	N/A
491	TTTATATGTAAGAGAGTTTGTATACAATGAAATAGTATATGTGTAACAGGTTGCTGCTTGGAAAGACAAGGATGGGGATTGGTATGAAACAGG	TTTATATGTAAGAGAGTTTGTATACAATGAAATAGTATATGTGTAACAGGTTGCTGCTTGGAAAGCCAAGGATGGGGATTGGTATGACACAGG	93	5	Sub	N/A
492	TTTATATGTAAGAGAGTTTGTATACAATGAAATAGTATATGTGTAACAGGTTGCTGCTTGGAAAGACAAGGATGGGGATTGGTATGAAACAGG	TTTATATGTAAGAGAGTTTGTATACAATGAAATAGTATATGTGTAACAGGTTGCGGCTTGGCAAGGCAAGGATGGGGATTGGTATGAAACAGG	93	5	Sub	N/A
493	TTTATATGTAAGAGAGTTTGTATACAATGAAATAGTATATGTGTAACAGGTTGCTGCTTGGAAAGACAAGGATGGGGATTGGTATGAAACAGG	TTTATATGTAAGAGAGTTTGTATACAATGAAATAGTATATGTGTAACAGGTTGCCGCTTGGTAAGCCAAGGATGGGGATTGGTATGAAACAGG	93	5	Sub	N/A
494	TTTATATGTAAGAGAGTTTGTATACAATGAAATAGTATATGTGTAACAGGTTGCTGCTTGGAAAGACAAGGATGGGGATTGGTATGAAACAGG	TTTATATGTAAGAGAGTTTGTATACAATGAAATAGTATATGTGTAACAGGTTGCCGCTTGGCAAGCCAAGGATGGGGATTGGTATGAAACAGG	93	5	Sub	N/A
495	TTTATATGTAAGAGAGTTTGTATACAATGAAATAGTATATGTGTAACAGGTTGCTGCTTGGAAAGACAAGGATGGGGATTGGTATGAAACAGG	TTTATATGTAAGAGAGTTTGTATACAATGAAATAGTATATGTGTAACAGGTTGCAGCTTGGCAAGCCAAGGATGGGGATTGGTATGAAACAGG	93	5	Sub	N/A
496	TTTATATGTAAGAGAGTTTGTATACAATGAAATAGTATATGTGTAACAGGTTGCTGCTTGGAAAGACAAGGATGGGGATTGGTATGAAACAGG	TTTATATGTAAGAGAGTTTGTATACAATGAAATAGTATATGTGTAACAGGTTGCTGCTTGGGAAGTCAAGGATGGGGATTGGTATGAAACAGG	93	5	Sub	N/A
497	TTTATATGTAAGAGAGTTTGTATACAATGAAATAGTATATGTGTAACAGGTTGCTGCTTGGAAAGACAAGGATGGGGATTGGTATGAAACAGG	TTTATATGTAAGAGAGTTTGTATACAATGAAATAGTATATGTGTAACAGGTTGCCGCTTGGCAAGTCAAGGATGGGGATTGGTATGAAACAGG	93	5	Sub	N/A
498	TTTATATGTAAGAGAGTTTGTATACAATGAAATAGTATATGTGTAACAGGTTGCTGCTTGGAAAGACAAGGATGGGGATTGGTATGAAACAGG	TTTATATGTAAGAGAGTTTGTATACAATGAAATAGTATATGTGTAACAGGTTGCCGCTTGGGAAGTCAAGGATGGGGATTGGTATGAAACAGG	93	5	Sub	N/A
499	TTTATATGTAAGAGAGTTTGTATACAATGAAATAGTATATGTGTAACAGGTTGCTGCTTGGAAAGACAAGGATGGGGATTGGTATGAAACAGG	TTTATATGTAAGAGAGTTTGTATACAATGAAATAGTATATGTGTAACAGGTTGCAGCTTGGGAAGCCAAGGATGGGGATTGGTATGAAACAGG	93	5	Sub	N/A
500	TTTATATGTAAGAGAGTTTGTATACAATGAAATAGTATATGTGTAACAGGTTGCTGCTTGGAAAGACAAGGATGGGGATTGGTATGAAACAGG	TTTATATGTAAGAGAGTTTGTATACAATGAAATAGTATATGTGTAATAGGTTGCAGCTTGGTAAGACAAGGATGGGGATTGGTATGAAACAGG	93	5	Sub	N/A
501	TTTATATGTAAGAGAGTTTGTATACAATGAAATAGTATATGTGTAACAGGTTGCTGCTTGGAAAGACAAGGATGGGGATTGGTATGAAACAGG	TTTATATGTAAGAGAGTTTGTATACAATGAAATAGTATATGTGTAACAGGTTGCGGCTTGGTAAGCCAAGGATGGGGATTGGTATGAAACAGG	93	5	Sub	N/A
502	TTTATATGTAAGAGAGTTTGTATACAATGAAATAGTATATGTGTAACAGGTTGCTGCTTGGAAAGACAAGGATGGGGATTGGTATGAAACAGG	TTTATATGTAAGAGAGTTTGTATACAATGAAATAGTATATGTGTAACAGGTTGCGGCTTGGCAAGCCAAGGATGGGGATTGGTATGAAACAGG	93	5	Sub	N/A
503	TTTATATGTAAGAGAGTTTGTATACAATGAAATAGTATATGTGTAACAGGTTGCTGCTTGGAAAGACAAGGATGGGGATTGGTATGAAACAGG	TTTATATGTAAGAGAGTTTGTATACAATGAAATAGTATATGTGTAACAGGTTGCTGCTTGGCAAGACAAGGATGGGGAATGGTATGAAACAGG	93	5	Sub	N/A
504	TTTATATGTAAGAGAGTTTGTATACAATGAAATAGTATATGTGTAACAGGTTGCTGCTTGGAAAGACAAGGATGGGGATTGGTATGAAACAGG	TTTATATGTAAGAGAGTTTGTATACAATGAAATAGTATATGTGTAACAGGTTGCTGCTTGGCAAGACAAGGATGGGGACTGGTATGAAACAGG	93	5	Sub	N/A
505	TTTATATGTAAGAGAGTTTGTATACAATGAAATAGTATATGTGTAACAGGTTGCTGCTTGGAAAGACAAGGATGGGGATTGGTATGAAACAGG	TTTATATGTAAGAGAGTTTGTATACAATGAAATAGTATATGTGTAACAGGTTGCAGCTTGGTAAGACAAGGATGGGGACTGGTATGAAACAGG	93	5	Sub	N/A
506	TTTATATGTAAGAGAGTTTGTATACAATGAAATAGTATATGTGTAACAGGTTGCTGCTTGGAAAGACAAGGATGGGGATTGGTATGAAACAGG	TTTATATGTAAGAGAGTTTGTATACAATGAAATAGTATATGTGTAACAGGTTGCCGCTTGGGAAGACAAGGATGGGGAATGGTATGAAACAGG	93	5	Sub	N/A
507	TTTATATGTAAGAGAGTTTGTATACAATGAAATAGTATATGTGTAACAGGTTGCTGCTTGGAAAGACAAGGATGGGGATTGGTATGAAACAGG	TTTATATGTAAGAGAGTTTGTATACAATGAAATAGTATATGTGTAACAGGTTGCGGCTTGGGAAGACAAGGATGGGGAATGGTATGAAACAGG	93	5	Sub	N/A
508	TTTATATGTAAGAGAGTTTGTATACAATGAAATAGTATATGTGTAACAGGTTGCTGCTTGGAAAGACAAGGATGGGGATTGGTATGAAACAGG	TTTATATGTAAGAGAGTTTGTATACAATGAAATAGTATATGTGTAACAGGTTGCTGCTTGGTAAGACAAGGATGGGGAATGGTATGAAACAGG	93	5	Sub	N/A
509	TTTATATGTAAGAGAGTTTGTATACAATGAAATAGTATATGTGTAACAGGTTGCTGCTTGGAAAGACAAGGATGGGGATTGGTATGAAACAGG	TTTATATGTAAGAGAGTTTGTATACAATGAAATAGTATATGTGTAACAGGTTGCTGCTTGGAAAGAACAGGATGGGGATTCGTATGAAACAGG	93	5	Sub	N/A
510	TTTATATGTAAGAGAGTTTGTATACAATGAAATAGTATATGTGTAACAGGTTGCTGCTTGGAAAGACAAGGATGGGGATTGGTATGAAACAGG	TTTATATGTAAGAGAGTTTGTATACAATGAAATAGTATATGTGTAATAGGTTGCTGCTTGCAAAGACAAGGATGGGGATTGGTCTGAAACAGG	93	5	Sub	N/A
511	TTTATATGTAAGAGAGTTTGTATACAATGAAATAGTATATGTGTAACAGGTTGCTGCTTGGAAAGACAAGGATGGGGATTGGTATGAAACAGG	TTTATATGTAAGAGAGTTTGTATACAATGAAATAGTATATGTGTAATAGGTTGCTGCTTGTAAAGACAAGGATGGGGATTGGTCTGAAACAGG	93	5	Sub	N/A
512	TTTATATGTAAGAGAGTTTGTATACAATGAAATAGTATATGTGTAACAGGTTGCTGCTTGGAAAGACAAGGATGGGGATTGGTATGAAACAGG	TTTATATGTAAGAGAGTTTGTATACAATGAAATAGTATATGTGTAATAGGTTGCTGCTGGGAAAGAC----ATGGGGATTGGTATGAAACAGG	89	5	del	N/A
513	TTTATATGTAAGAGAGTTTGTATACAATGAAATAGTATATGTGTAACAGGTTGCTGCTTGGAAAGACAAGGATGGGGATTGGTATGAAACAGG	TTTATATGTAAGAGAGTTTGTATACAATGAAATAGTATATGTGTAACAGGTTGCTGCTTGGAAAGCCCAGGATGGGGATTGGTATGAAACAGG	93	5	Sub	N/A
514	TTTATATGTAAGAGAGTTTGTATACAATGAAATAGTATATGTGTAACAGGTTGCTGCTTGGAAAGACAAGGATGGGGATTGGTATGAAACAGG	TTTATATGTAAGAGAGTTTGTATACAATGAAATAGTATATGTGTAACAGTGTGCTGCTTGGAAAGACAAGGATGGGGATTGGCATGAAACAGG	93	5	Sub	N/A
515	TTTATATGTAAGAGAGTTTGTATACAATGAAATAGTATATGTGTAACAGGTTGCTGCTTGGAAAGACAAGGATGGGGATTGGTATGAAACAGG	TTTATATGTAAGAGAGTTTGTATACAATGAAATAGTATATGTGTAATAGGCTGCTGCTTGGAAAGACAAGGATGGGGATTGGGATGAAACAGG	93	5	Sub	N/A
516	TTTATATGTAAGAGAGTTTGTATACAATGAAATAGTATATGTGTAACAGGTTGCTGCTTGGAAAGACAAGGATGGGGATTGGTATGAAACAGG	TTTATATGTAAGAGAGTTTGTATACAATGAAATAGTATATGTGTAATAGGGTGCTGCTTGGAAAGACAAGGATGGGGATTGGGATGAAACAGG	93	5	Sub	N/A
517	TTTATATGTAAGAGAGTTTGTATACAATGAAATAGTATATGTGTAACAGGTTGCTGCTTGGAAAGACAAGGATGGGGATTGGTATGAAACAGG	TTTATATGTAAGAGAGTTTGTATACAATGAAATAGTATATGTGTAACAGGTTGCTGCTTGAAAAGACAAGGATGGGGATTAGTATGAAACAGG	93	5	Sub	N/A
518	TTTATATGTAAGAGAGTTTGTATACAATGAAATAGTATATGTGTAACAGGTTGCTGCTTGGAAAGACAAGGATGGGGATTGGTATGAAACAGG	TTTATATGTAAGAGAGTTTGTATACAATGAAATAGTATATGTGTAACAGGTTGCTGCTTGTAAAGAC----ATGGGGATTGGTATGAAACAGG	89	5	del	N/A
519	TTTATATGTAAGAGAGTTTGTATACAATGAAATAGTATATGTGTAACAGGTTGCTGCTTGGAAAGACAAGGATGGGGATTGGTATGAAACAGG	TTTATATGTAAGAGAGTTTGTATACAATGAAATAGTATATGTGTAATAGGTTGGTGCTTGGAAAGACAAGGCTGGGGATTGGTATGAAACAGG	93	5	Sub	N/A
520	TTTATATGTAAGAGAGTTTGTATACAATGAAATAGTATATGTGTAACAGGTTGCTGCTTGGAAAGACAAGGATGGGGATTGGTATGAAACAGG	TTTATATGTAAGAGAGTTTGTATACAATGAAATAGTATATGTGTAACCGGTTGCTGCTTGGAAAGACAAGGATGGGGATTGGTATGAAAAAGG	93	5	Sub	N/A
521	TTTATATGTAAGAGAGTTTGTATACAATGAAATAGTATATGTGTAACAGGTTGCTGCTTGGAAAGACAAGGATGGGGATTGGTATGAAACAGG	TTTATATGTAAGAGAGTTTGTATACAATGAAATAGTATATGTGTAACAGGTTGCTGCTTGGAAAGAC----ATGGGGATTGGTATGAAACAGC	89	4	del	N/A
522	TTTATATGTAAGAGAGTTTGTATACAATGAAATAGTATATGTGTAACAGGTTGCTGCTTGGAAAGACAAGGATGGGGATTGGTATGAAACAGG	TTTATATGTAAGAGAGTTTGTATACAATGAAATAGTATATGTGTAACAGGTTGCTGCTTGGAAAGACGAGGATGGGGATTGGTATGCAACAGG	93	4	Sub	N/A
523	TTTATATGTAAGAGAGTTTGTATACAATGAAATAGTATATGTGTAACAGGTTGCTGCTTGGAAAGACAAGGATGGGGATTGGTATGAAACAGG	TTTATATGTAAGAGAGTTTGTATACAATGAAATAGTATATGTGTAACAGGTTGCTGCTTGGAAAGACCAGGATGGGGATTGGTATGAAACAGA	93	4	Sub	N/A
524	TTTATATGTAAGAGAGTTTGTATACAATGAAATAGTATATGTGTAACAGGTTGCTGCTTGGAAAGACAAGGATGGGGATTGGTATGAAACAGG	TTTATATGTAAGAGAGTTTGTATACAATGAAATAGTATATGTGTAATTGGTTGCTGCTTGGAAAGACAAGGATGGGGATTTGTATGAAACAGG	93	4	Sub	N/A
525	TTTATATGTAAGAGAGTTTGTATACAATGAAATAGTATATGTGTAACAGGTTGCTGCTTGGAAAGACAAGGATGGGGATTGGTATGAAACAGG	TTTATATGTAAGAGAGTTTGTATACAATGAAATAGTATATGTGTAACTGGTTGCTGCTTGGAAAGACTAGGATGGGGGTTGGTATGAAACAGG	93	4	Sub	N/A
526	TTTATATGTAAGAGAGTTTGTATACAATGAAATAGTATATGTGTAACAGGTTGCTGCTTGGAAAGACAAGGATGGGGATTGGTATGAAACAGG	TTTATATGTAAGAGAGTTTGTATACAATGAAATAGTATATGTGTAATAGGTTGCTGCTTGGAAAGAAAAGGATGGGGATTGGTATGAAACACG	93	4	Sub	N/A
527	TTTATATGTAAGAGAGTTTGTATACAATGAAATAGTATATGTGTAACAGGTTGCTGCTTGGAAAGACAAGGATGGGGATTGGTATGAAACAGG	TTTATATGTAAGAGAGTTTGTATACAATAAAATAGTATATGTGTAACAGGTTGCTGCTTGGAAAGAC----ATGGGGATTGGTATGAAACAGG	89	4	del	N/A
528	TTTATATGTAAGAGAGTTTGTATACAATGAAATAGTATATGTGTAACAGGTTGCTGCTTGGAAAGACAAGGATGGGGATTGGTATGAAACAGG	TTTATATGTAAGAGAGTTTGTATACAATGAAATAGTATATGTGTAACAGGTTGCTGCTTGGAAAGA----AATGGGGATTGGTATGAAACAGG	89	4	del	N/A
529	TTTATATGTAAGAGAGTTTGTATACAATGAAATAGTATATGTGTAACAGGTTGCTGCTTGGAAAGACAAGGATGGGGATTGGTATGAAACAGG	TTTATATGTAAGAGAGTTTGTATACAATGAAATAGTATATGTGTAACAGGTTGCTGCTTGGAAAGACGAGGATGGGGGTTGGTATGAAACAGG	93	4	Sub	N/A
530	TTTATATGTAAGAGAGTTTGTATACAATGAAATAGTATATGTGTAACAGGTTGCTGCTTGGAAAGACAAGGATGGGGATTGGTATGAAACAGG	TTTATATGTAAGAGAGTTTGTATACAATGAAATAGTATATGTGTAACAGGTTGCTGCTCGGAAAGAC----ATGGGGATTGGTATGAAACAGG	89	4	del	N/A
531	TTTATATGTAAGAGAGTTTGTATACAATGAAATAGTATATGTGTAACAGGTTGCTGCTTGGAAAGACAAGGATGGGGATTGGTATGAAACAGG	TTTATATGTAAGAGAGTTTGTATACAATGAAATAGTATATGTGTAATAGGTTGCTGCTTGGAAAGACCAGGATGGGGATTGGTATGACACAGG	93	4	Sub	N/A
532	TTTATATGTAAGAGAGTTTGTATACAATGAAATAGTATATGTGTAACAGGTTGCTGCTTGGAAAGACAAGGATGGGGATTGGTATGAAACAGG	TTTATATGTAAGAGAGTTTGTATACAATGAAATAGTATATGTGTAACAGGTTCATGCTTGGAAAGACAAGGATGGGGATTGGTATGAAACAGG	93	4	Sub	N/A
533	TTTATATGTAAGAGAGTTTGTATACAATGAAATAGTATATGTGTAACAGGTTGCTGCTTGGAAAGACAAGGATGGGGATTGGTATGAAACAGG	TTTATATGTAAGAAAGTTT-TATATAATGAAATAGTGTATGTGTAACAGGTTGCTGCTTGGAAAGACAAGGATGGGGATTGGTATGAAACAGG	92	4	del	N/A
534	TTTATATGTAAGAGAGTTTGTATACAATGAAATAGTATATGTGTAACAGGTTGCTGCTTGGAAAGACAAGGATGGGGATTGGTATGAAACAGG	TTTATATGTAAGAGAGTTTGTATACAATGAAATAGTATATGTGTAATAGGTTGCTGCTTGGAAAGAACAGGATGGGGATTGGTATGAAACAGG	93	4	Sub	N/A
535	TTTATATGTAAGAGAGTTTGTATACAATGAAATAGTATATGTGTAACAGGTTGCTGCTTGGAAAGACAAGGATGGGGATTGGTATGAAACAGG	TTTATATGTAAGAGAGTTTGTATACAATGAAATAGTATATGTGTAATAGGTTGATGCTTGGAAAGACCAGGATGGGGATTGGTATGAAACAGG	93	4	Sub	N/A
536	TTTATATGTAAGAGAGTTTGTATACAATGAAATAGTATATGTGTAACAGGTTGCTGCTTGGAAAGACAAGGATGGGGATTGGTATGAAACAGG	TTTATATGTAAGAGAGTTTGTATACAATGAAATAGTATATGTGTAATAGGTTGATGCTGGGAAAGACAAGGATGGGGATTGGTATGAAACAGG	93	4	Sub	N/A
537	TTTATATGTAAGAGAGTTTGTATACAATGAAATAGTATATGTGTAACAGGTTGCTGCTTGGAAAGACAAGGATGGGGATTGGTATGAAACAGG	TTTATATGTAAGAGAGTTTGTATACAATGAAATAGTATATGTGTAACCGGTTGCTGCTTGGAAAGACAACGATGGGGATTGGTATGAAACAGG	93	4	Sub	N/A
538	TTTATATGTAAGAGAGTTTGTATACAATGAAATAGTATATGTGTAACAGGTTGCTGCTTGGAAAGACAAGGATGGGGATTGGTATGAAACAGG	TTTATATGTAAGAGAGTTTGTATACAATGAAATAGTATATGGGTAACAGGTTGCTGCTGGGAAAGACAAGGATGGGGATTGGTATGAAACAGG	93	4	Sub	N/A
539	TTTATATGTAAGAGAGTTTGTATACAATGAAATAGTATATGTGTAACAGGTTGCTGCTTGGAAAGACAAGGATGGGGATTGGTATGAAACAGG	TTTATATGTAAGAGAGTTTGTATACAATGAAATAGTATATGTGTAACAGGTTGCGGCTTGGAAAGACAAGGATGGGGATTGGTATGAGACAGG	93	4	Sub	N/A
540	TTTATATGTAAGAGAGTTTGTATACAATGAAATAGTATATGTGTAACAGGTTGCTGCTTGGAAAGACAAGGATGGGGATTGGTATGAAACAGG	TTTATATGTAAGAGAGTTTGTATACAATGAAATAGTATATGTGTAACAGGTTGCTGCTTGGAAAGAC----ATGGGGATTGGTATGGAACAGG	89	4	del	N/A
541	TTTATATGTAAGAGAGTTTGTATACAATGAAATAGTATATGTGTAACAGGTTGCTGCTTGGAAAGACAAGGATGGGGATTGGTATGAAACAGG	TTTATATGTAAGAGAGTTTGTATACAATGAAATAGTATATGTGTAACAGGTTGCTGCCTGGAAAGACGAGGATGGGGATTGGTATGAAACAGG	93	4	Sub	N/A
542	TTTATATGTAAGAGAGTTTGTATACAATGAAATAGTATATGTGTAACAGGTTGCTGCTTGGAAAGACAAGGATGGGGATTGGTATGAAACAGG	TTTATATGTAAGAGAGTTTGTATACAATGAAATAGTATATGTGTAACTGGTTGCGGCTTGGAAAGATTAGGATGGGGATTGGTATGAAACAGG	93	4	Sub	N/A
543	TTTATATGTAAGAGAGTTTGTATACAATGAAATAGTATATGTGTAACAGGTTGCTGCTTGGAAAGACAAGGATGGGGATTGGTATGAAACAGG	TTTATATGTAAGAGAGTTTGTATACAATGAAATAGTATATGTGTAACAGGTTGCTGCTTGGAAAGAAAAGAATGGGGATTGGTATGAAACAGG	93	4	Sub	N/A
544	TTTATATGTAAGAGAGTTTGTATACAATGAAATAGTATATGTGTAACAGGTTGCTGCTTGGAAAGACAAGGATGGGGATTGGTATGAAACAGG	TTTATATGTAAGAGAGTTTGTATATAATGAAACAGTGTATGTGTAACAGGTTGCTGCTTGGAAAGAC----ATGGGGATTGGTATGCAACAGG	89	4	del	N/A
545	TTTATATGTAAGAGAGTTTGTATACAATGAAATAGTATATGTGTAACAGGTTGCTGCTTGGAAAGACAAGGATGGGGATTGGTATGAAACAGG	TTTATATGTAAGAGAGTTTGTATACAATGAAATAGTATATGTGTAATCGGTTGCTGCTTGGAAAGACAAGGATGGGGATTGGTATGAAACACG	93	4	Sub	N/A
546	TTTATATGTAAGAGAGTTTGTATACAATGAAATAGTATATGTGTAACAGGTTGCTGCTTGGAAAGACAAGGATGGGGATTGGTATGAAACAGG	TATATATGTAAGAGAGTTTGTATACAATGAAATAGTATATGTGTAATAGGTTGCTGCTTGGAAAGACAAGGATGGGGATTGGTATGAAACAGG	93	4	Sub	N/A
547	TTTATATGTAAGAGAGTTTGTATACAATGAAATAGTATATGTGTAACAGGTTGCTGCTTGGAAAGACAAGGATGGGGATTGGTATGAAACAGG	TTTATATGTAAGAGAGTTTGTATACAATGAAATAGTATATGTGTAACAGGTTGCTGCTTGGAAAGACAGGGATGGGGCTTAGTATGAAACAGG	93	4	Sub	N/A
548	TTTATATGTAAGAGAGTTTGTATACAATGAAATAGTATATGTGTAACAGGTTGCTGCTTGGAAAGACAAGGATGGGGATTGGTATGAAACAGG	TTTATATGTAAGAGAGTTTGTATACAATGAAATAGTATATGTGTAACAGGTTGATGCTTGGAAAGACCAGGATGGGGATTAGTATGAAACAGG	93	4	Sub	N/A
549	TTTATATGTAAGAGAGTTTGTATACAATGAAATAGTATATGTGTAACAGGTTGCTGCTTGGAAAGACAAGGATGGGGATTGGTATGAAACAGG	TTTATATGTAAGAGAGTTTGTATACAATGAAATAGTATATGTGTAACGGGTTGCTGCTTGGAAAGACAAGGATGGGGATTGGTATGCAACAGG	93	4	Sub	N/A
550	TTTATATGTAAGAGAGTTTGTATACAATGAAATAGTATATGTGTAACAGGTTGCTGCTTGGAAAGACAAGGATGGGGATTGGTATGAAACAGG	TTTATATGTAAGAGAGTTTGTATACAATGAAATAGTATATGTGTAACAGGTTGCTGCTTGGAAAGACAAGGATGGGGGTTCGTATGAAACAGG	93	4	Sub	N/A
551	TTTATATGTAAGAGAGTTTGTATACAATGAAATAGTATATGTGTAACAGGTTGCTGCTTGGAAAGACAAGGATGGGGATTGGTATGAAACAGG	TTTATATGTAAGAGAGTTTGTATACAATGAAATAGTATATGTGTAACGGGTTGCTGCTTGGAAAGACAAGGATGGGGATTGATATGAAACAGG	93	4	Sub	N/A
552	TTTATATGTAAGAGAGTTTGTATACAATGAAATAGTATATGTGTAACAGGTTGCTGCTTGGAAAGACAAGGATGGGGATTGGTATGAAACAGG	TTTATATGTAAGAGAGTTTGTATACAATGAAATAGTATATGTGTAACAGGTTGCTGCTTGGAAAGACACGGATGGGGATTGGTATGAAAAAGG	93	4	Sub	N/A
553	TTTATATGTAAGAGAGTTTGTATACAATGAAATAGTATATGTGTAACAGGTTGCTGCTTGGAAAGACAAGGATGGGGATTGGTATGAAACAGG	TTTATATGTAAGAGAGTTTGTATACAATGAAATAGTATATGTGTAACACGTTGCTGCTTGGAAAGACAAGGATGGGGATTAGTATGAAACAGG	93	4	Sub	N/A
554	TTTATATGTAAGAGAGTTTGTATACAATGAAATAGTATATGTGTAACAGGTTGCTGCTTGGAAAGACAAGGATGGGGATTGGTATGAAACAGG	TTTATATGTAAGAGAGTTTGTATACAATGAAATAGTATATGTGTAACAGGTTGCTGGTTGGAAAGACAAGGATGGGGATTCGTATGAAACAGG	93	4	Sub	N/A
555	TTTATATGTAAGAGAGTTTGTATACAATGAAATAGTATATGTGTAACAGGTTGCTGCTTGGAAAGACAAGGATGGGGATTGGTATGAAACAGG	TTTATATGTAAGAGAGTTTGTATACAATGAAATAGTATATGTGTAACGGGTTGCTGCTTGGAAAGACGAGGATGGGGATTGGTATGGAACAGG	93	4	Sub	N/A
556	TTTATATGTAAGAGAGTTTGTATACAATGAAATAGTATATGTGTAACAGGTTGCTGCTTGGAAAGACAAGGATGGGGATTGGTATGAAACAGG	TTTATATGTAAGAGAGTTTGTATACAATGAAATAGTATATGTGTAACAGGGTGCTGCTTGGAAAGACAAGGATGGGGATTGGTATGAAAAAGG	93	4	Sub	N/A
557	TTTATATGTAAGAGAGTTTGTATACAATGAAATAGTATATGTGTAACAGGTTGCTGCTTGGAAAGACAAGGATGGGGATTGGTATGAAACAGG	TTTATATGTAAGAGAGTTTGTATACAATGAAATAGTATATGTGTAACAGGTTGCTGATTGGAAAGACAAGGATGGGGATTGCTATGAAACAGG	93	4	Sub	N/A
558	TTTATATGTAAGAGAGTTTGTATACAATGAAATAGTATATGTGTAACAGGTTGCTGCTTGGAAAGACAAGGATGGGGATTGGTATGAAACAGG	TTTATATGTAAGAGAGTTTGTATACAATGAAATAGTATATGTGTAATCGGTTGATGCTTGGAAAGACAAGGATGGGGATTGGTATGAAACAGG	93	4	Sub	N/A
559	TTTATATGTAAGAGAGTTTGTATACAATGAAATAGTATATGTGTAACAGGTTGCTGCTTGGAAAGACAAGGATGGGGATTGGTATGAAACAGG	TTTATATGTAAGAGAGTTTGTATACAATGAAATAGTATATGTGTAACAGGTTGCTGCTTGGAAAGGCAAGGATGGGGATTGGTATGCAACAGG	93	4	Sub	N/A
560	TTTATATGTAAGAGAGTTTGTATACAATGAAATAGTATATGTGTAACAGGTTGCTGCTTGGAAAGACAAGGATGGGGATTGGTATGAAACAGG	TTTATATGTAAGAGAGTTTGTATACAATGAAATAGTATATGTGTAACAGGTTGCTGGTTGGAAAGAGAAGGATGGGGATTGGTATGAAACAGG	93	4	Sub	N/A
561	TTTATATGTAAGAGAGTTTGTATACAATGAAATAGTATATGTGTAACAGGTTGCTGCTTGGAAAGACAAGGATGGGGATTGGTATGAAACAGG	TTTATATGTAAGAGAGTTTGTATACAATGAAATAGTATATGTGTAACAGGTTGGTGCTTGGAAAGACAAGGAGGGGGATTGGTATGGAACAGG	93	4	Sub	N/A
562	TTTATATGTAAGAGAGTTTGTATACAATGAAATAGTATATGTGTAACAGGTTGCTGCTTGGAAAGACAAGGATGGGGATTGGTATGAAACAGG	TTTATATGTAAGAGAGTTTGTATATAATGGAATAGTGTATGTGTAACGGGTTGCGGCTTGGAAAGACAAGGATGGGGATTGGTATGAAACAGG	93	4	Sub	N/A
563	TTTATATGTAAGAGAGTTTGTATACAATGAAATAGTATATGTGTAACAGGTTGCTGCTTGGAAAGACAAGGATGGGGATTGGTATGAAACAGG	TTTATATGTAAGAGAGTTTGTATACAATGAAATAGTATATGTGTAACCGGTTGCTGCTTGGAAAGACAAGGATGGGGTTTGGTATGAAACAGG	93	4	Sub	N/A
564	TTTATATGTAAGAGAGTTTGTATACAATGAAATAGTATATGTGTAACAGGTTGCTGCTTGGAAAGACAAGGATGGGGATTGGTATGAAACAGG	TTTATATGTAAGAGAGTTTGTATACAATGAAATAGTATATGTGTAACAGGTTGCTGCTGGGAAAGAGAAGGATGGGGATTGGTATGAAACAGG	93	4	Sub	N/A
565	TTTATATGTAAGAGAGTTTGTATACAATGAAATAGTATATGTGTAACAGGTTGCTGCTTGGAAAGACAAGGATGGGGATTGGTATGAAACAGG	TTTATATGTAAGAGAGTTTGTATACAATGAAATAGTATATGTGTAATTGGTTGCTGCTTGGAAAGATTAGGATGGGGATTGGTATGAAACAGG	93	4	Sub	N/A
566	TTTATATGTAAGAGAGTTTGTATACAATGAAATAGTATATGTGTAACAGGTTGCTGCTTGGAAAGACAAGGATGGGGATTGGTATGAAACAGG	TTTATATGTAAGAGAGTTTGTATACAATGAAATAGTATATGTGTAACAGGTTGCTGCTAGGAAAGACAAGGATGGGGATTGCTATGAAACAGG	93	4	Sub	N/A
567	TTTATATGTAAGAGAGTTTGTATACAATGAAATAGTATATGTGTAACAGGTTGCTGCTTGGAAAGACAAGGATGGGGATTGGTATGAAACAGG	TTTATATGTAAGAGAGTTTGTATACAATGAAATAGTATATGTGTAACTGGTTGCTGCTTGGAAAGATGAGGATGGGGATTGGTATGAAACAGG	93	4	Sub	N/A
568	TTTATATGTAAGAGAGTTTGTATACAATGAAATAGTATATGTGTAACAGGTTGCTGCTTGGAAAGACAAGGATGGGGATTGGTATGAAACAGG	TTTATATGTAAGAGAGTTTGTATACAATGAAATAGTATATGTGTAACAGGTTAATGCTTGGAAAGACAAGGATGGGGATTGGTATGAAACAGG	93	4	Sub	N/A
569	TTTATATGTAAGAGAGTTTGTATACAATGAAATAGTATATGTGTAACAGGTTGCTGCTTGGAAAGACAAGGATGGGGATTGGTATGAAACAGG	TTTATATGTAAGAGAGTTTGTATACAATGAAATAGTATATGTTTAACAGGTTGCTGCTTGGAAAGACAAGGATGGGGATTGGTATGACACAGG	93	4	Sub	N/A
570	TTTATATGTAAGAGAGTTTGTATACAATGAAATAGTATATGTGTAACAGGTTGCTGCTTGGAAAGACAAGGATGGGGATTGGTATGAAACAGG	TTTATATGTAAGAGAGTTTGTATACAATGAAATAGTATATGTGTAACAGGTTGATGCTTGGAAAGACAAGGATGGGGGTTGGTATGATACAGG	93	4	Sub	N/A
571	TTTATATGTAAGAGAGTTTGTATACAATGAAATAGTATATGTGTAACAGGTTGCTGCTTGGAAAGACAAGGATGGGGATTGGTATGAAACAGG	TTTATATGTAAGAGAGTTTGTATACAATGAAATAGTATATGTGTAACAGGTTACGGCTTGGAAAGACAAGGATGGGGATTGGTATGAAACAGG	93	4	Sub	N/A
572	TTTATATGTAAGAGAGTTTGTATACAATGAAATAGTATATGTGTAACAGGTTGCTGCTTGGAAAGACAAGGATGGGGATTGGTATGAAACAGG	TTTATATGTAAGAGAGTTTGTATATAATGAAACAGTGTATGTGTAACAGGTTGCTGCTTGGAAAGAC----ATGGGGATTTGTATGAAACAGG	89	4	del	N/A
573	TTTATATGTAAGAGAGTTTGTATACAATGAAATAGTATATGTGTAACAGGTTGCTGCTTGGAAAGACAAGGATGGGGATTGGTATGAAACAGG	TTTATATGTAAGAGAGTTTGTATACAATGAAATAGTATATGTGTAACTGGTTGCTGCTTGGAAAGACAAGGATGGGGATTGGTATGTAACAGG	93	4	Sub	N/A
574	TTTATATGTAAGAGAGTTTGTATACAATGAAATAGTATATGTGTAACAGGTTGCTGCTTGGAAAGACAAGGATGGGGATTGGTATGAAACAGG	TTTATATGTAAGAGAGTTTGTATACAATGAAATAGTATATGTGTAACAGGTTGATGCTTGGAAAGACAAGGATGGGGATTGGTATGATACAGG	93	4	Sub	N/A
575	TTTATATGTAAGAGAGTTTGTATACAATGAAATAGTATATGTGTAACAGGTTGCTGCTTGGAAAGACAAGGATGGGGATTGGTATGAAACAGG	TTTATATGTAAGAGAGTTTGTATACAATGAAA-AGTGTATGTGTAACAGGTTGCTGCTTGGAAAGAAAAGGATGGGGATTGGTATGAAACAGG	92	4	del	N/A
576	TTTATATGTAAGAGAGTTTGTATACAATGAAATAGTATATGTGTAACAGGTTGCTGCTTGGAAAGACAAGGATGGGGATTGGTATGAAACAGG	TTTATATGTAAGAGAGTTTGTATACAATGAAATAGTATATGTGTAACAGGTTACTGCTTGGAAAGACAAGGATGGGGATTGGTATGACACAGG	93	4	Sub	N/A
577	TTTATATGTAAGAGAGTTTGTATACAATGAAATAGTATATGTGTAACAGGTTGCTGCTTGGAAAGACAAGGATGGGGATTGGTATGAAACAGG	TTTATATGTAAGAGAGTTTGTATATAATGAAACAGTGTATGTGTAACAGGTTGCTGCTTGGAAAGAC----ATGGGGATTGGTATGAAACACG	89	4	del	N/A
578	TTTATATGTAAGAGAGTTTGTATACAATGAAATAGTATATGTGTAACAGGTTGCTGCTTGGAAAGACAAGGATGGGGATTGGTATGAAACAGG	TTTATATGTAAGAGAGTTTGTATACAATGAAATAGTATATGTGTAATAGGTTGCTGCTTGGAAAGACAGGGATGGGGATTAGTATGAAACAGG	93	4	Sub	N/A
579	TTTATATGTAAGAGAGTTTGTATACAATGAAATAGTATATGTGTAACAGGTTGCTGCTTGGAAAGACAAGGATGGGGATTGGTATGAAACAGG	TTTATATGTAAGAGAGTTTGTATACAATGAAATAGTATATGTGTAACAGGTTGCTGCTTGAAAAGAC----ATGGGGATTGGTATGAAACAGG	89	4	del	N/A
580	TTTATATGTAAGAGAGTTTGTATACAATGAAATAGTATATGTGTAACAGGTTGCTGCTTGGAAAGACAAGGATGGGGATTGGTATGAAACAGG	TTTATATGTAAGAGAGTTTGTATACAATGAAATAGTATATGTGTAACTGGTTGCTGCTTGGAAAGACAAGGATGGGGATTGCTATGAAACAGG	93	4	Sub	N/A
581	TTTATATGTAAGAGAGTTTGTATACAATGAAATAGTATATGTGTAACAGGTTGCTGCTTGGAAAGACAAGGATGGGGATTGGTATGAAACAGG	TTTATATGTAAGAGAGTTTGTATACAATGAAATAGTATATGTGTAACAGGTTGATGCTCGGAAAGACAAGGATGGGGATTGGTATGAAACAGG	93	4	Sub	N/A
582	TTTATATGTAAGAGAGTTTGTATACAATGAAATAGTATATGTGTAACAGGTTGCTGCTTGGAAAGACAAGGATGGGGATTGGTATGAAACAGG	TTTATATGTAAGAGAGTTTGTATACAATGAAATAGTATATGTGTAACAGGNTGCTGCTTGGANAGACAAGGATGGGGATTGGTATGAAACAGG	93	4	Sub	N/A
583	TTTATATGTAAGAGAGTTTGTATACAATGAAATAGTATATGTGTAACAGGTTGCTGCTTGGAAAGACAAGGATGGGGATTGGTATGAAACAGG	TTTATATGTAAGAGAGTTTGTATACAATGAAATAGTGTATGTGTAACGGGTTGCTGCTTGGAAAGACAAGGATGGGGATTGGTATGAAACACG	93	4	Sub	N/A
584	TTTATATGTAAGAGAGTTTGTATACAATGAAATAGTATATGTGTAACAGGTTGCTGCTTGGAAAGACAAGGATGGGGATTGGTATGAAACAGG	TTTATATGTAAGAGAGTTTGTATATAATGGAATAGTGTATGTGTAACGGGTTGCTGCTTGGAAAGACAAGGATGGGGATTTGTATGAAACAGG	93	4	Sub	N/A
585	TTTATATGTAAGAGAGTTTGTATACAATGAAATAGTATATGTGTAACAGGTTGCTGCTTGGAAAGACAAGGATGGGGATTGGTATGAAACAGG	TTTATATGTAAGAAAGTTTGTATACAATGAAATAGTATATGTGTAACGGGTTGCTGCTTGGAAAGACAAGGATGGGGATTGGTATGAAACAGG	93	4	Sub	N/A
586	TTTATATGTAAGAGAGTTTGTATACAATGAAATAGTATATGTGTAACAGGTTGCTGCTTGGAAAGACAAGGATGGGGATTGGTATGAAACAGG	TTTATATGTAAGAGAGTTTGTATACAATGAAATAGTATATGTGTAACAGGTGGCTGCTTGGAAAGACAAGGATGGGGATTCGTATGAAACAGG	93	4	Sub	N/A
587	TTTATATGTAAGAGAGTTTGTATACAATGAAATAGTATATGTGTAACAGGTTGCTGCTTGGAAAGACAAGGATGGGGATTGGTATGAAACAGG	TTTATATGTAAGAGAGTTTGTATATAATGAAA-AGTGTATGTGTAACAGGTTGCTGCTTGGAAAGACAAGGATGGGGATTAGTATGAAACAGG	92	4	del	N/A
588	TTTATATGTAAGAGAGTTTGTATACAATGAAATAGTATATGTGTAACAGGTTGCTGCTTGGAAAGACAAGGATGGGGATTGGTATGAAACAGG	TTTATATGTAAGAGAGTTTGTATACAATGAAATAGTATATGTGTAACGGGTTGATGCTTGGAAAGACAAGGATGGGGATTGGTATGGAACAGG	93	4	Sub	N/A
589	TTTATATGTAAGAGAGTTTGTATACAATGAAATAGTATATGTGTAACAGGTTGCTGCTTGGAAAGACAAGGATGGGGATTGGTATGAAACAGG	TTTATATGTAAGAGAGTTTGTATACAATGAAATAGTATATGTGTAACAGGTTGCGGCTTGGAAAGACAAGGATGGGGATTGCTATGAAACAGG	93	4	Sub	N/A
590	TTTATATGTAAGAGAGTTTGTATACAATGAAATAGTATATGTGTAACAGGTTGCTGCTTGGAAAGACAAGGATGGGGATTGGTATGAAACAGG	TTTATATGTAAGAGAGTTTGTATACAATGAAATAGTATATGTGTAACCGGTTGCTGCTTGGAAGGACAAGGATGGGGATTGGTATGAAACAGG	93	4	Sub	N/A
591	TTTATATGTAAGAGAGTTTGTATACAATGAAATAGTATATGTGTAACAGGTTGCTGCTTGGAAAGACAAGGATGGGGATTGGTATGAAACAGG	TTTATATGTAAGAGAGTTTGTATACAATGAAATAGTATATGTGTAATAGGTTGCTGCTTGGAAAGACAAGGATGGGGCTTCGTATGAAACAGG	93	4	Sub	N/A
592	TTTATATGTAAGAGAGTTTGTATACAATGAAATAGTATATGTGTAACAGGTTGCTGCTTGGAAAGACAAGGATGGGGATTGGTATGAAACAGG	TTTATATGTAAGAGAGTTTGTATACAATGAAATAGTATATGTGTAACGGGTTGCTGCTTGGAAAGACAGGGATGGGGATTAGTATGAAACAGG	93	4	Sub	N/A
593	TTTATATGTAAGAGAGTTTGTATACAATGAAATAGTATATGTGTAACAGGTTGCTGCTTGGAAAGACAAGGATGGGGATTGGTATGAAACAGG	TTTATATGTAAGAGAGTTTGTATACAATGAAATAGTATATGTGTAGCAGGTTGCTGCTTGGAAAGACAAGGATGGGGATTGGTATGAAACACG	93	4	Sub	N/A
594	TTTATATGTAAGAGAGTTTGTATACAATGAAATAGTATATGTGTAACAGGTTGCTGCTTGGAAAGACAAGGATGGGGATTGGTATGAAACAGG	TTTATATGTAAGAGAGTTTGTATACAATGAAATAGTATATGTGTAACAGGTTGCTGCTTGGAAAGAAATGGATGGGGATTGGTATGAAACAGG	93	4	Sub	N/A
595	TTTATATGTAAGAGAGTTTGTATACAATGAAATAGTATATGTGTAACAGGTTGCTGCTTGGAAAGACAAGGATGGGGATTGGTATGAAACAGG	TTTATATGTAAGAGAGTTTGTATACAATGAAATAGTATATGTGTAACAGGTTGCTGCTTGGAAAGACACGGATGGGGATTGGTATGATACAGG	93	4	Sub	N/A
596	TTTATATGTAAGAGAGTTTGTATACAATGAAATAGTATATGTGTAACAGGTTGCTGCTTGGAAAGACAAGGATGGGGATTGGTATGAAACAGG	TTTATATGTAAGAGAGTTTGTATACAATGAAATAGTATATGTGTAACAGGTTGCTTCTTGGAAAGACCAGGATGGGGATTGGTATGAAACAGG	93	4	Sub	N/A
597	TTTATATGTAAGAGAGTTTGTATACAATGAAATAGTATATGTGTAACAGGTTGCTGCTTGGAAAGACAAGGATGGGGATTGGTATGAAACAGG	TTTATATGTAAGAGAGTTTGTATACAATGAAATAGTATATGTGTAACAGGTTGCTGCTTGGAAAGACAGGGATGGGGATTGGTATGACACAGG	93	4	Sub	N/A
598	TTTATATGTAAGAGAGTTTGTATACAATGAAATAGTATATGTGTAACAGGTTGCTGCTTGGAAAGACAAGGATGGGGATTGGTATGAAACAGG	TTTATATGTAAGAGAGTTTGTATACAATGAAATAGTATATGTGTAACAGGTTGCTGATTGGAAAGACAACGATGGGGATTGGTATGAAACAGG	93	4	Sub	N/A
599	TTTATATGTAAGAGAGTTTGTATACAATGAAATAGTATATGTGTAACAGGTTGCTGCTTGGAAAGACAAGGATGGGGATTGGTATGAAACAGG	TTTATATGTAAGAGAGTTTGTATACAATGAAATAGTATATGTGTAACAGGTTGCTGCTTGGAAAGACAACGATGGGGATTGGTATGGAACAGG	93	4	Sub	N/A
600	TTTATATGTAAGAGAGTTTGTATACAATGAAATAGTATATGTGTAACAGGTTGCTGCTTGGAAAGACAAGGATGGGGATTGGTATGAAACAGG	TTTATATGTAAGAGAGTTTGTATACAATGAAATAGTATCTGTGTAACAGGTTGCTGCTTGGAAAGACAAGGATGGGGATTGGTATGAAACAGG	93	4	Sub	N/A
601	TTTATATGTAAGAGAGTTTGTATACAATGAAATAGTATATGTGTAACAGGTTGCTGCTTGGAAAGACAAGGATGGGGATTGGTATGAAACAGG	TTTATATGTAAGAGAGTTTGTATACAATGAAATAGTATATGTGTAACAGGTTTCTGCTGGGAAAGACAAGGATGGGGATTGGTATGAAACAGG	93	4	Sub	N/A
602	TTTATATGTAAGAGAGTTTGTATACAATGAAATAGTATATGTGTAACAGGTTGCTGCTTGGAAAGACAAGGATGGGGATTGGTATGAAACAGG	TTTATATGTAAGAGAGTTTGTATACAATGAAATAGTATATATGTAATAGGTTGCTGCTTGGAAAGACAAGGATGGGGATTGGTATGAAACAGG	93	4	Sub	N/A
603	TTTATATGTAAGAGAGTTTGTATACAATGAAATAGTATATGTGTAACAGGTTGCTGCTTGGAAAGACAAGGATGGGGATTGGTATGAAACAGG	TTTATATGTAAGAGAGTTTGTATACAATGAAATAGTATATGTGTAACAGGTTGATGCTTGGAAAGAAAAGGATGGGGATTGGTATGAAACAGC	93	4	Sub	N/A
604	TTTATATGTAAGAGAGTTTGTATACAATGAAATAGTATATGTGTAACAGGTTGCTGCTTGGAAAGACAAGGATGGGGATTGGTATGAAACAGG	TTTATATGTAAGAGAGTTTGTATACAATGAAATAGTATATGTGTAACTGGTTGCTGCTTGGAAAGACAGGGATGGGGATTGGTATGAAACAGG	93	4	Sub	N/A
605	TTTATATGTAAGAGAGTTTGTATACAATGAAATAGTATATGTGTAACAGGTTGCTGCTTGGAAAGACAAGGATGGGGATTGGTATGAAACAGG	TTTATATGTAAGAGAGTTTGTATACAATGAAATAGTATATGTGTAACCGTTTGCTGCTTGGAAAGACAAGGATGGGGATTGGTATGAAACAGG	93	4	Sub	N/A
606	TTTATATGTAAGAGAGTTTGTATACAATGAAATAGTATATGTGTAACAGGTTGCTGCTTGGAAAGACAAGGATGGGGATTGGTATGAAACAGG	TTTATATGTAAGAGAGTTTGTATACAATGAAATAGTATATGTGTAATAGGTTGCTGCTTGGAAAGACTTGGATGGGGATTGGTATGAAACAGG	93	4	Sub	N/A
607	TTTATATGTAAGAGAGTTTGTATACAATGAAATAGTATATGTGTAACAGGTTGCTGCTTGGAAAGACAAGGATGGGGATTGGTATGAAACAGG	TTTATATGTAAGAGAGTTTGTATACAATGAAATAGTATATGTGTAACAGGTTGCTGCTTGGAAAGACAAGGATGGGGGTTGGTATGAAACATG	93	4	Sub	N/A
608	TTTATATGTAAGAGAGTTTGTATACAATGAAATAGTATATGTGTAACAGGTTGCTGCTTGGAAAGACAAGGATGGGGATTGGTATGAAACAGG	TTTATATGTAAGAGAGTTTGTATACAATGAAATAGTATATGTGTAGCAGGTTGCTGCTTGGAAAGACAAAGATGGGGATTGGTATGAAACAGG	93	4	Sub	N/A
609	TTTATATGTAAGAGAGTTTGTATACAATGAAATAGTATATGTGTAACAGGTTGCTGCTTGGAAAGACAAGGATGGGGATTGGTATGAAACAGG	TTTATATGTAAGAGAGTTTGTATACAATGAAATAGTATATGTGTAACAGGTTGCTGCTTGGAAAGATATGGATGGGGATTGGTATGAAACAGG	93	4	Sub	N/A
610	TTTATATGTAAGAGAGTTTGTATACAATGAAATAGTATATGTGTAACAGGTTGCTGCTTGGAAAGACAAGGATGGGGATTGGTATGAAACAGG	TTTATATGTAAGAGAGTTTGTATACAATGAAATAGTATATGTGTAACAGGTTGCTGCTTGGAACGACACGGATGGGGATTGGTATGAAACAGG	93	4	Sub	N/A
611	TTTATATGTAAGAGAGTTTGTATACAATGAAATAGTATATGTGTAACAGGTTGCTGCTTGGAAAGACAAGGATGGGGATTGGTATGAAACAGG	TTTATATGTAAGAGAGTTTGTATACAATGAACTAGTATATGTGTAACAGGTTGCTGCTTGGAAAGAAAAGGATGGGGATTGGTATGAAACAGG	93	4	Sub	N/A
612	TTTATATGTAAGAGAGTTTGTATACAATGAAATAGTATATGTGTAACAGGTTGCTGCTTGGAAAGACAAGGATGGGGATTGGTATGAAACAGG	TTTATATGTAAGAGAGTTTGTATACAATGAAATAGTATATGTGTAATTGGTTGCTGCTTGGAAAGAAAAGGATGGGGATTGGTATGAAACAGG	93	4	Sub	N/A
613	TTTATATGTAAGAGAGTTTGTATACAATGAAATAGTATATGTGTAACAGGTTGCTGCTTGGAAAGACAAGGATGGGGATTGGTATGAAACAGG	TTTATATGTAAGAGAGTTTGTATACAATGAAATAGTATATGTGTAACAGGTTGCTGGTTGGAAAGAAAAGGATGGGGATTGGTATGAAACAGG	93	4	Sub	N/A
614	TTTATATGTAAGAGAGTTTGTATACAATGAAATAGTATATGTGTAACAGGTTGCTGCTTGGAAAGACAAGGATGGGGATTGGTATGAAACAGG	TTTATATGTAAGAGAGTTTGTATATAATGGAATAGTGTATGTGTAACGGGTTGCTGCTTGGAAAGACAAGGATGGGGATTGGAATGAAACAGG	93	4	Sub	N/A
615	TTTATATGTAAGAGAGTTTGTATACAATGAAATAGTATATGTGTAACAGGTTGCTGCTTGGAAAGACAAGGATGGGGATTGGTATGAAACAGG	TTTATATGTAAGAGAGTTTGTATACAATGAAATAGTATATGTGTAATAGGTTGCTGCTTGGAAAGACTCGGATGGGGATTGGTATGAAACAGG	93	4	Sub	N/A
616	TTTATATGTAAGAGAGTTTGTATACAATGAAATAGTATATGTGTAACAGGTTGCTGCTTGGAAAGACAAGGATGGGGATTGGTATGAAACAGG	TTTATATGTAAGAGAGTTTGTATACAATGAAATAGTATATGTGTAATCGGTTGCTGCTTGGAAAGACAAGGATGGGGATTGGTATGCAACAGG	93	4	Sub	N/A
617	TTTATATGTAAGAGAGTTTGTATACAATGAAATAGTATATGTGTAACAGGTTGCTGCTTGGAAAGACAAGGATGGGGATTGGTATGAAACAGG	TTTATATGTAAGAGAGTTTGTATATAATGAAACAGTGTATGTGTAACAGGTTGCTGCTTGGAAAGACATGGATGGGGATTGGTATGAAACAGG	93	4	Sub	N/A
618	TTTATATGTAAGAGAGTTTGTATACAATGAAATAGTATATGTGTAACAGGTTGCTGCTTGGAAAGACAAGGATGGGGATTGGTATGAAACAGG	TTTATATGTAAGAGAGTTTGTATATAATGAAACAGTGTATGTGTAACAGGTTGCTGCGTGGAAAGAC----ATGGGGATTGGTATGAAACAGG	89	4	del	N/A
619	TTTATATGTAAGAGAGTTTGTATACAATGAAATAGTATATGTGTAACAGGTTGCTGCTTGGAAAGACAAGGATGGGGATTGGTATGAAACAGG	TTTATATGTAAGAGAGTTTGTATACAATGAAATAGTATATGTGTAACAGGTTGTTGCTTGGAAAGACTAGGATGGGGATTGGTATGAAACAGG	93	4	Sub	N/A
620	TTTATATGTAAGAGAGTTTGTATACAATGAAATAGTATATGTGTAACAGGTTGCTGCTTGGAAAGACAAGGATGGGGATTGGTATGAAACAGG	TTTATATGTAAGAGAGTTTGTATACAATGAAATAGTATATGTGTAACAGGTTGATGCGTGGAAAGACAAGGATGGGGATTGGTATGAAACAGG	93	4	Sub	N/A
621	TTTATATGTAAGAGAGTTTGTATACAATGAAATAGTATATGTGTAACAGGTTGCTGCTTGGAAAGACAAGGATGGGGATTGGTATGAAACAGG	TTTATATGTAAGAGAGTTTGTATACAATGAAATAGTATATGTGTAACAGGTTGATGCTTGGAAAGAACAGGATGGGGATTGGTATGAAACAGG	93	4	Sub	N/A
622	TTTATATGTAAGAGAGTTTGTATACAATGAAATAGTATATGTGTAACAGGTTGCTGCTTGGAAAGACAAGGATGGGGATTGGTATGAAACAGG	TTTATATGTAAGAGAGTTTGTATACAATGAAATAGTATATGTGTAACAGGTCGCTGCTTGGAAAGAC----ATGGGGATTGGTATGAAACAGG	89	4	del	N/A
623	TTTATATGTAAGAGAGTTTGTATACAATGAAATAGTATATGTGTAACAGGTTGCTGCTTGGAAAGACAAGGATGGGGATTGGTATGAAACAGG	TTTATATGTAAGAGAGTTTGTATACAATGAAATAGTATATGTGTAACAGGTTGCTGCTTGGAAAGACGTGGATGGGGATTGGTATGAAACAGG	93	4	Sub	N/A
624	TTTATATGTAAGAGAGTTTGTATACAATGAAATAGTATATGTGTAACAGGTTGCTGCTTGGAAAGACAAGGATGGGGATTGGTATGAAACAGG	TTTATATGTAAGAGAGTTTGTATACAATGAAACAGTGTATGTGTAACAGGTTGCTGCTTGGAAAGAC----ATGGGGATTCGTATGAAACAGG	89	4	del	N/A
625	TTTATATGTAAGAGAGTTTGTATACAATGAAATAGTATATGTGTAACAGGTTGCTGCTTGGAAAGACAAGGATGGGGATTGGTATGAAACAGG	TTTATATGTAAGAGAGTTTGTATACAATGAAATAGTATATGTGTAATAGGTTGCTGCTTGGAAAGACAACGATGGGGATTGGCATGAAACAGG	93	4	Sub	N/A
626	TTTATATGTAAGAGAGTTTGTATACAATGAAATAGTATATGTGTAACAGGTTGCTGCTTGGAAAGACAAGGATGGGGATTGGTATGAAACAGG	TTTATATGTAAGAGAGTTTGTATACAATGAAATAGTATATGTGTAACAGGTTACTGCTTGGAAAGAC----ATGGGGATTGGTATGAAACAGG	89	4	del	N/A
627	TTTATATGTAAGAGAGTTTGTATACAATGAAATAGTATATGTGTAACAGGTTGCTGCTTGGAAAGACAAGGATGGGGATTGGTATGAAACAGG	TTTATATGTAAGAGAGTTTGTATACAATGAAATAGTATATGTGTAACAGGTTGATGCTTGGAAAGAC----ATGGGGATTGGTATGAAACAGG	89	4	del	N/A
628	TTTATATGTAAGAGAGTTTGTATACAATGAAATAGTATATGTGTAACAGGTTGCTGCTTGGAAAGACAAGGATGGGGATTGGTATGAAACAGG	TTTATATGTAAGAGAGTTTGTATACAATGAAATAGTATATGTGTAACAGGCTGCTGCTTGGAAAGAC----ATGGGGATTGGTATGAAACAGG	89	4	del	N/A
629	TTTATATGTAAGAGAGTTTGTATACAATGAAATAGTATATGTGTAACAGGTTGCTGCTTGGAAAGACAAGGATGGGGATTGGTATGAAACAGG	TTTATATGTAAGAGAGTTTGTATACAATGAAATAGTATATGTGTAACTGGTTGCTGCTTGGAAAGACAAGGATGGGGATTGTTATGAAACAGG	93	4	Sub	N/A
630	TTTATATGTAAGAGAGTTTGTATACAATGAAATAGTATATGTGTAACAGGTTGCTGCTTGGAAAGACAAGGATGGGGATTGGTATGAAACAGG	TTTATATGTAAGAGAGTTTGTATACAATGAAATAGTATATGTGTAACCGGTTGCTGCTTGGAAAGACAGGGATGGGGATTGGTATGAAACAGG	93	4	Sub	N/A
631	TTTATATGTAAGAGAGTTTGTATACAATGAAATAGTATATGTGTAACAGGTTGCTGCTTGGAAAGACAAGGATGGGGATTGGTATGAAACAGG	TTTATATGTAAGAGAGTTTGTATACAATGAAATAGTATATGTGTAACAGGTTTCTGCTTGGAAAGACAAGGATGGGGATTGGTATGAAACAGC	93	4	Sub	N/A
632	TTTATATGTAAGAGAGTTTGTATACAATGAAATAGTATATGTGTAACAGGTTGCTGCTTGGAAAGACAAGGATGGGGATTGGTATGAAACAGG	TTTATATGTAAGAGAGTTTGTATACAATGAAATAGTATATGTGTAACAGGTGGCTGCTTGGAAAGACAAGGATGGGGATTGGTATGAAAAAGG	93	4	Sub	N/A
633	TTTATATGTAAGAGAGTTTGTATACAATGAAATAGTATATGTGTAACAGGTTGCTGCTTGGAAAGACAAGGATGGGGATTGGTATGAAACAGG	TTTATATGTAAGAGAGTTTGTATAAAATGAAATAGTATATGTGTTATA-GTTGCTGCTTGGAAAGAC----ATGGGGATTGGTATGAAACAGG	88	4	del	N/A
634	TTTATATGTAAGAGAGTTTGTATACAATGAAATAGTATATGTGTAACAGGTTGCTGCTTGGAAAGACAAGGATGGGGATTGGTATGAAACAGG	TTTATATGTAAGAGAGTTTGTATACAATGAAATAGAATATGTGTAATAGGTTGCTGCTTGGAAAGACAAGGATGGGGATTGGTATGAAACAGG	93	4	Sub	N/A
635	TTTATATGTAAGAGAGTTTGTATACAATGAAATAGTATATGTGTAACAGGTTGCTGCTTGGAAAGACAAGGATGGGGATTGGTATGAAACAGG	TTTATATGTAAGAGAGTTTGTATATAATGAAACAGTGTATGTGTAACAGGTTGCTGCTTGGAAAGAC----ATGGGGATTGGTATGACACAGG	89	4	del	N/A
636	TTTATATGTAAGAGAGTTTGTATACAATGAAATAGTATATGTGTAACAGGTTGCTGCTTGGAAAGACAAGGATGGGGATTGGTATGAAACAGG	TTTATATGTAAGAGAGTTTGTATACAATGAAATAGTATATGTGTAACAGGTTGCTGCTGGGAAAGACAAGGATGGGGATTGGTAGGAAACAGG	93	4	Sub	N/A
637	TTTATATGTAAGAGAGTTTGTATACAATGAAATAGTATATGTGTAACAGGTTGCTGCTTGGAAAGACAAGGATGGGGATTGGTATGAAACAGG	TTTATATGTAAGAGAGTTTGTATACAATGAAATAGTATATGTGTAAAAGGTTGCTGCTTGGAAAGACAAGGATGGGGATTGGGATGAAACAGG	93	4	Sub	N/A
638	TTTATATGTAAGAGAGTTTGTATACAATGAAATAGTATATGTGTAACAGGTTGCTGCTTGGAAAGACAAGGAT------------------GGGGATTGGTATGAAACAGG	TTTATATGTAAGAGAGTTTGTATACAATGAAATAGTATATGTGTAACAGGTTGCTGCTTGGAAAGACAAGGATGGGGATTGGTATGAAATAGGGGATTGGTATGAAACAGG	111	4	Ins	N/A
639	TTTATATGTAAGAGAGTTTGTATACAATGAAATAGTATATGTGTAACAGGTTGCTGCTTGGAAAGACAAGGATGGGGATTGGTATGAAACAGG	TTTATATGTAAGAGAGTTTGTATACAATGAAATAGTATATGTGTAACAGGTTGCTGTTTGGAAAGACAAGGATGGGGATTTGTATGAAACAGG	93	4	Sub	N/A
640	TTTATATGTAAGAGAGTTTGTATACAATGAAATAGTATATGTGTAACAGGTTGCTGCTTGGAAAGACAAGGATGGGGATT-GGTATGAAACAGG	TTTATATGTAAGAGAGTTTGTATACAATGAAATAGTATATGTGTAACAGGTTGCTGCTTGGAAAGACAAGGATGGGGATTGGGTATGAAACAGG	94	4	Ins	N/A
641	TTTATATGTAAGAGAGTTTGTATACAATGAAATAGTATATGTGTAACAGGTTGCTGCTTGGAAAGACAAGGATGGGGATTGGTATGAAACAGG	TTTATATGTAAGAGAGTTTGTATACAATGAAATAGTATATGTGTAATAGGTTGCTGCTTGGAAAGACAGGGATGGGGATTGGTATGAAACATG	93	4	Sub	N/A
642	TTTATATGTAAGAGAGTTTGTATACAATGAAATAGTATATGTGTAACAGGTTGCTGCTTGGAAAGACAAGGATGGGGATTGGTATGAAACAGG	TTTATATGTAAGAGAGTTTGTATACAATGAAATAGTATATGTGTAATAGGTTGCTGCTTGGAAAGACCGGGATGGGGATTAGTATGAAACAGG	93	4	Sub	N/A
643	TTTATATGTAAGAGAGTTTGTATACAATGAAATAGTATATGTGTAACAGGTTGCTGCTTGGAAAGACAAGGATGGGGATTGGTATGAAACAGG	TTTATATGTAAGAGAGTTTGTATACAATGAAATAGTATATGTGTAACAGGTTGCTGCTTGGAAAGACCAGGATGGGGATTGTTATGAAACAGG	93	4	Sub	N/A
644	TTTATATGTAAGAGAGTTTGTATACAATGAAATAGTATATGTGTAACAGGTTGCTGCTTGGAAAGACAAGGATGGGGATTGGTATGAAACAGG	TTTATATGTAAGAGAGTTTGTATACAATGAAATAGTATATGTGTAACAGGTTGCTGCTTGGAAAGACAACGATGGGGATTGCTATGAAACAGG	93	4	Sub	N/A
645	TTTATATGTAAGAGAGTTTGTATACAATGAAATAGTATATGTGTAACAGGTTGCTGCTTGGAAAGACAAGGATGGGGATTGGTATGAAACAGG	TTTATATGTAAGAGAGTTTGTATACAATGAAGTAGTATATGCGTAACAGGTTGCTGCTTGGAAAGACAAGGATGGGGATTGGTATGAAACAGG	93	4	Sub	N/A
646	TTTATATGTAAGAGAGTTTGTATACAATGAAATAGTATATGTGTAACAGGTTGCTGCTTGGAAAGACAAGGATGGGGATTGGTATGAAACAGG	TTTATATGTAAGAGAGTTTGTATACAATGAAATAGTATATGTGTAACAGGTTCCTGCTTGGAAAGAAAAGGATGGGGATTGGTATGAAACAGG	93	4	Sub	N/A
647	TTTATATGTAAGAGAGTTTGTATACAATGAAATAGTATATGTGTAACAGGTTGCTGCTTGGAAAGACAAGGATGGGGATTGGTATGAAACAGG	TTTATATGTAAGAGAGTTTGTATATAATGAAACAGTGTATGTGTAACAGGTTGCTGCTTGGAAAGAC----ATGGGGTTTGGTATGAAACAGG	89	4	del	N/A
648	TTTATATGTAAGAGAGTTTGTATACAATGAAATAGTATATGTGTAACAGGTTGCTGCTTGGAAAGACAAGGATGGGGATTGGTATGAAACAGG	TTTATATGTAAGAGAGTTTGTATACAATGAAATAGTATATGTGTAACAGGTTGCGGCTTGGAAAGACAAGGATGGGGATTGGTATGAAACAAG	93	4	Sub	N/A
649	TTTATATGTAAGAGAGTTTGTATACAATGAAATAGTATATGTGTAACAGGTTGCTGCTTGGAAAGACAAGGATGGGGATTGGTATGAAACAGG	TTTATATGTAAGAGAGTTTGTATACAATGAAATAGTATATGTGTAATAGGTTGCTGCTTGGAAAGAGAAGGATGGGGATTCGTATGAAACAGG	93	4	Sub	N/A
650	TTTATATGTAAGAGAGTTTGTATACAATGAAATAGTATATGTGTAACAGGTTGCTGCTTGGAAAGACAAGGATGGGGATTGGTATGAAACAGG	TTTATATGTAAGAGAGTTTGTATACAATGAAATAGTGTATGTGTAACAGGTTGCTGCTTGGAAAGAC----ATGGGGATTAGTATGAAACAGG	89	4	del	N/A
651	TTTATATGTAAGAGAGTTTGTATACAATGAAATAGTATATGTGTAACAGGTTGCTGCTTGGAAAGACAAGGATGGGGATTGGTATGAAACAGG	TTTATATGTAAGAGAGCTTGTATACAATGAAATAGTATATGTGTAACAGGTTGCTGCTTGGAAAGACGAGGATGGGGATTGGTATGAAACAGG	93	4	Sub	N/A
652	TTTATATGTAAGAGAGTTTGTATACAATGAAATAGTATATGTGTAACAGGTTGCTGCTTGGAAAGACAAGGATGGGGATTGGTATGAAACAGG	TTTATATGTAAGAGAGTTTGTATACAATGAAATAGTATATGTGTAACAGGTTGCTCCTTGGAAAGACGAGGATGGGGATTGGTATGAAACAGG	93	4	Sub	N/A
653	TTTATATGTAAGAGAGTTTGTATACAATGAAATAGTATATGTGTAACAGGTTGCTGCTTGGAAAGACAAGGATGGGGATTGGTATGAAACAGG	TTTATATGTAAGAGAGTTTGTATACAATGAAATAGTATATGTGTAACAGGTTGCTGCCTGGAAAGACAACGATGGGGATTGGTATGAAACAGG	93	4	Sub	N/A
654	TTTATATGTAAGAGAGTTTGTATACAATGAAATAGTATATGTGTAACAGGTTGCTGCTTGGAAAGACAAGGATGGGGATTGGTATGAAACAGG	TTTATATGTAAGAGAGTTTGTATACAATGAAATAGTATATGTGTAACAGGTTGCTGCTTGGAAAGATAAGGATGGGGATTGGGATGAAACAGG	93	4	Sub	N/A
655	TTTATATGTAAGAGAGTTTGTATACAATGAAATAGTATATGTGTAACAGGTTGCTGCTTGGAAAGACAAGGATGGGGATTGGTATGAAACAGG	TTTATATGTAAGAGAGTTTGTATACAATGAAATAGTATATGTGTAACAGGTTGCTGCTTGGAAAGACAAGGATGTGGTTTGGTATGAAACAGG	93	4	Sub	N/A
656	TTTATATGTAAGAGAGTTTGTATACAATGAAATAGTATATGTGTAACAGGTTGCTGCTTGGAAAGACAAGGATGGGGATTGGTATGAAACAGG	TTTATATGTAAGAGAGTTTGTATACAATGAAATAGTATATGTGTAACAGGTTGCTGCATGGAAAGACAAGGATGGGGATTAGTATGAAACAGG	93	4	Sub	N/A
657	TTTATATGTAAGAGAGTTTGTATACAATGAAATAGTATATGTGTAACAGGTTGCTGCTTGGAAAGACAAGGATGGGGATTGGTATGAAACAGG	TTTATATGTAAGAGAGTTTGTATACAATGAACTAGTATATGTGTAACAGGTTGCTGCTTGGAAAGACAAGGATGGGGATTCGTATGAAACAGG	93	4	Sub	N/A
658	TTTATATGTAAGAGAGTTTGTATACAATGAAATAGTATATGTGTAACAGGTTGCTGCTTGGAAAGACAAGGATGGGGATTGGTATGAAACAGG	TTTATATGTAAGAGAGTTTGTATACAATGAAATAGTATATGTGTAACAGGTTGCTGCTTGGCAAGACCAGGATGGGGATTGGTATGAAACAGG	93	4	Sub	N/A
659	TTTATATGTAAGAGAGTTTGTATACAATGAAATAGTATATGTGTAACAGGTTGCTGCTTGGAAAGACAAGGATGGGGATTGGTATGAAACAGG	TTTATATGTAAGAGAGTTTGTATACAATGAAATGATGTAGGTGTAACAGGTTGCTGCTTGGAAAGACAAGGATGGGGATTGGTATGAAACAGG	93	4	Sub	N/A
660	TTTATATGTAAGAGAGTTTGTATACAATGAAATAGTATATGTGTAACAGGTTGCTGCTTGGAAAGACAAGGATGGGGATTGGTATGAAACAGG	TTTATATGTAAGAGAGTTTGTATACAATGAAATAGTATATGTGTAACTGGTTGCTGCTTGGAAAGACGAGGATGGGGATTGGTATGAAACAGG	93	4	Sub	N/A
661	TTTATATGTAAGAGAGTTTGTATACAATGAAATAGTATATGTGTAACAGGTTGCTGCTTGGAAAGACAAGGATGGGGATTGGTATGAAACAGG	TTTATATGTAAGAGAGTTTGTATACAATGAAATAGTATATGTGTAACAGGTTGCTGCTTGGAAAGACACCGATGGGGATTGGTATGAAACAGG	93	4	Sub	N/A
662	TTTATATGTAAGAGAGTTTGTATACAATGAAATAGTATATGTGTAACAGGTTGCTGCTTGGAAAGACAAGGATGGGGATTGGTATGAAACAGG	TTTATATGTAAGAGAGTTTGTATACAATGAAATAGTATATGTGTAACCGGTTGCTGCTTGGAAAGACATGGATGGGGATTGGTATGAAACAGG	93	4	Sub	N/A
663	TTTATATGTAAGAGAGTTTGTATACAATGAAATAGTATATGTGTAACAGGTTGCTGCTTGGAAAGACAAGGATGGGGATTGGTATGAAACAGG	TTTATATGTAAGGGAGTTTGTATACAATGAAATAGTATATGTGTAACAGGTTGCTGCTTGGAAAGAC----ATGGGGATTGGTATGAAACAGG	89	4	del	N/A
664	TTTATATGTAAGAGAGTTTGTATACAATGAAATAGTATATGTGTAACAGGTTGCTGCTTGGAAAGACAAGGATGGGGATTGGTATGAAACAGG	TTTATATGTAAGAAAGTTTGTATACAATGAAATAGTGTATGTGTAACGGGTTGCTGCTTGGAAAGACAAGGATGGGGATTGGTATGAAACAGG	93	4	Sub	N/A
665	TTTATATGTAAGAGAGTTTGTATACAATGAAATAGTATATGTGTAACAGGTTGCTGCTTGGAAAGACAAGGATGGGGATTGGTATGAAACAGG	TTTATATGTAAGAGAGTTTGTATACAATGAAATAGTATATGTGTAATCGGTTGCTGCTTGGAAAGAAAAGGATGGGGATTGGTATGAAACAGG	93	4	Sub	N/A
666	TTTATATGTAAGAGAGTTTGTATACAATGAAATAGTATATGTGTAACAGGTTGCTGCTTGGAAAGACAAGGATGGGGATTGGTATGAAACAGG	TTTATATGTAAGACAGTTTGTATACAATGAAATAGTATATGTGTAACAGGTTGCTGCTTGGAAAGACAAGGATGGGGATTGGTATGAAACAGG	93	4	Sub	N/A
667	TTTATATGTAAGAGAGTTTGTATACAATGAAATAGTATATGTGTAACAGGTTGCTGCTTGGAAAGACAAGGATGGGGATTGGTATGAAACAGG	TCTATATGTAAGAGAGTTTGTATACAATGAAATAGTATATGTGTAACAGGTTGCTGCTTGGAAAGACAAGGATGGGGATTAGTATGAAACAGG	93	4	Sub	N/A
668	TTTATATGTAAGAGAGTTTGTATACAATGAAATAGTATATGTGTAACAGGTTGCTGCTTGGAAAGACAAGGATGGGGATTGGTATGAAACAGG	TTTATATGTAAGAGAGTTTGTATACAATGAAATAGTATATGTGTAACAGGTTGCTGCTTGGAAAG----GCATGGGGATTGGTATGAAACAGG	89	4	del	N/A
669	TTTATATGTAAGAGAGTTTGTATACAATGAAATAGTATATGTGTAACAGGTTGCTGCTTGGAAAGACAAGGATGGGGATTGGTATGAAACAGG	TTTATATGTAAGAGAGTTTGTATACAATGAAATAGTATATGTGTAACAGGTTCCTGCTTGGAAAGAACAGGATGGGGATTGGTATGAAACAGG	93	4	Sub	N/A
670	TTTATATGTAAGAGAGTTTGTATACAATGAAATAGTATATGTGTAACAGGTTGCTGCTTGGAAAGACAAGGATGGGGATTGGTATGAAACAGG	TTTATATGTAAGAGAGTTTGTATACAATGAAATAGTATATGTGTAGTAGGTTGCTGCTTGGAAAGACAAGGATGGGGATTGGTATGAAACAGG	93	4	Sub	N/A
671	TTTATATGTAAGAGAGTTTGTATACAATGAAATAGTATATGTGTAACAGGTTGCTGCTTGGAAAGACAAGGATGGGGATTGGTATGAAACAGG	TTTATATGTAAGAGAGTTTGTATACAATGAAATAGTATATGTGTAACAGGTTGCTGCTGGGAAAGACAAGGATGGGGATTGGTATGACACAGG	93	4	Sub	N/A
672	TTTATATGTAAGAGAGTTTGTATACAATGAAATAGTATATGTGTAACAGGTTGCTGCTTGGAAAGACAAGGATGGGGATTGGTATGAAACAGG	TTTATATGTAAGAGAGTTTGTATACAATGAAATAGTATATGTGTAACCGGTTGCTGCTTGGAAAGACAAGGATGGGGATTGGTCTGAAACAGG	93	4	Sub	N/A
673	TTTATATGTAAGAGAGTTTGTATACAATGAAATAGTATATGTGTAACAGGTTGCTGCTTGGAAAGACAAGGATGGGGATTGGTATGAAACAGG	TTTATATGTAAGAGAGTTTGTATACAATGAAATAGTATATGTGTAACGGGTTGCTGCTTGGAAAGACCAGGATGGGGATTGGTATGAAACAGG	93	4	Sub	N/A
674	TTTATATGTAAGAGAGTTTGTATACAATGAAATAGTATATGTGTAACAGGTTGCTGCTTGGAAAGACAAGGATGGGGATTGGTATGAAACAGG	TTTATATGTAAGAGAGTTTGTATACAATGAAATAGTATATGTGTAACAGGTTCCTGCTTGGAAAGACCAGGATGGGGATTCGTATGAAACAGG	93	4	Sub	N/A
675	TTTATATGTAAGAGAGTTTGTATACAATGAAATAGTATATGTGTAACAGGTTGCTGCTTGGAAAGACAAGGATGGGGATTGGTATGAAACAGG	TTTATATGTAAGAGAGTTTGTATACAATGAAATAGTATATGTGTAACCGGTTGCTGCTTGGAAAGAC----ATGGGGATTGGTATGAAACAGG	89	4	del	N/A
676	TTTATATGTAAGAGAGTTTGTATACAATGAAATAGTATATGTGTAACAGGTTGCTGCTTGGAAAGACAAGGATGGGGATTGGTATGAAACAGG	TTTATATGGAAGAGAGTTTGTATACAATGAAATAGTATATGTGTAACAGGTTGCTGCTTGGAAAGACAAGGATGGGGATTGGGATGAAACAGG	93	4	Sub	N/A
677	TTTATATGTAAGAGAGTTTGTATACAATGAAATAGTATATGTGTAACAGGTTGCTGCTTGGAAAGACAAGGATGGGGATTGGTATGAAACAGG	TTTATATGTAAGAGAGTTTGTATACAATGAAATAGTATATGTGTAACAGGTTTCTGCTTGGAAAGACACGGATGGGGATTGGTATGAAACAGG	93	4	Sub	N/A
678	TTTATATGTAAGAGAGTTTGTATACAATGAAATAGTATATGTGTAACAGGTTGCTGCTTGGAAAGACAAGGATGGGGATTGGTATGAAACAGG	TTTATATGGAAGAGAGTTTGTATACAATGAAATAGTATATGTGTAATAGGTTGCTGCTTGGAAAGACAAGGATGGGGATTGGTATGAAACAGG	93	4	Sub	N/A
679	TTTATATGTAAGAGAGTTTGTATACAATGAAATAGTATATGTGTAACAGGTTGCTGCTTGGAAAGACAAGGATGGGGATTGGTATGAAACAGG	TTTATATCTAAGAGAGTTTGTATACAATGAAATAGTATATGTGTAACAGGTTGCTGCTTGGAAAGACAAGGATGGGGATTGGTATGAAACAGG	93	4	Sub	N/A
680	TTTATATGTAAGAGAGTTTGTATACAATGAAATAGTATATGTGTAACAGGTTGCTGCTTGGAAAGACAAGGATGGGGATTGGTATGAAACAGG	TTTATATGTAAGAGAGTTTGTATACAATGAAATAGTATATGTGTAACAGGTTGCTGCTTGGACAGAC----ATGGGGATTGGTATGAAACAGG	89	4	del	N/A
681	TTTATATGTAAGAGAGTTTGTATACAATGAAATAGTATATGTGTAACAGGTTGCTGCTTGGAAAGACAAGGATGGGGATTGGTATGAAACAGG	TTTATATGTAAGAGAGTTTGTATACAATGAAATAGTATATGTGTAATAGGTTGCTGCTTGGAAAGATAAGGATGGGGATTCGTATGAAACAGG	93	4	Sub	N/A
682	TTTATATGTAAGAGAGTTTGTATACAATGAAATAGTATATGTGTAACAGGTTGCTGCTTGGAAAGACAAGGATGGGGATTGGTATGAAACAGG	TTTATATGTAAGAGAGTTTGTATACAGTGAAATAGTATATGTGTAACAGGTTGCTGCTTGGAAAGACAAGGATGGGGATTAGTATGAAACAGG	93	4	Sub	N/A
683	TTTATATGTAAGAGAGTTTGTATACAATGAAATAGTATATGTGTAACAGGTTGCTGCTTGGAAAGACAAGGATGGGGATTGGTATGAAACAGG	TTTATATGTAAGAGAGTTTGTATACAATGAAATAGTATATGTGTAATAGGTTGCTGCTTGGAAAGATAAGGATGGGGATTAGTATGAAACAGG	93	4	Sub	N/A
684	TTTATATGTAAGAGAGTTTGTATACAATGAAATAGTATATGTGTAACAGGTTGCTGCTTGGAAAGACAAGGATGGGGATTGGTATGAAACAGG	TTTATATGTAAGAGAGTTTGTATACAATGAAATAGTATATGTGTAACAGGTTGTTGCTTGGAAAGAAAAGGATGGGGATTGGTATGAAACAGG	93	4	Sub	N/A
685	TTTATATGTAAGAGAGTTTGTATACAATGAAATAGTATATGTGTAACAGGTTGCTGCTTGGAAAGACAAGGATGGGGATTGGTATGAAACAGG	TTTATATGTAAGAGAGTTTGTATACAATGAAATAGTATATGTGTAACTGGTTGCTGCTTGGAAAGATTAGGATGGGGGTTGGTATGAAACACG	93	4	Sub	N/A
686	TTTATATGTAAGAGAGTTTGTATACAATGAAATAGTATATGTGTAACAGGTTGCTGCTTGGAAAGACAAGGATGGGGATTGGTATGAAACAGG	TTTATATGTAAGAGAGTTTGTATACAATGAAATAGTATATGTGTTATAGGTTGCTGCCTGGAAAGACAAGGATGGGGATTGGTATGAAACAGG	93	4	Sub	N/A
687	TTTATATGTAAGAGAGTTTGTATACAATGAAATAGTATATGTGTAACAGGTTGCTGCTTGGAAAGACAAGGATGGGGATTGGTATGAAACAGG	TTTATATGTAAGAGAGTTTGTATACAATGAAATAGTATATGTGTAACAGGTTGCTGCTTGGAAAGAAAACGATGGGGATTGGTATGAAACAGG	93	4	Sub	N/A
688	TTTATATGTAAGAGAGTTTGTATACAATGAAATAGTATATGTGTAACAGGTTGCTGCTTGGAAAGACAAGGATGGGGATTGGTATGAAACAGG	TTTATATGTAAGAGAGTTTGTATACAATGAAATAGTATATGTGTAATAGGTTGCTGCTTGGAAAGACAACGATGGGGAATGGTATGAAACAGG	93	4	Sub	N/A
689	TTTATATGTAAGAGAGTTTGTATACAATGAAATAGTATATGTGTAACAGGTTGCTGCTTGGAAAGACAAGGATGGGGATTGGTATGAAACAGG	TTTATATGTAAGAGAGTTTGTATACAATGAAATAGTATATGTGTAACAGGTTGCTGCTTGGAAAGACAATTATGGGGATTGGTATGAAACAGG	93	4	Sub	N/A
690	TTTATATGTAAGAGAGTTTGTATACAATGAAATAGTATATGTGTAACAGGTTGCTGCTTGGAAAGACAAGGATGGGGATTGGTATGAAACAGG	TTTATATGTAAGAGAGTTTGTATACAATGAAATAGTATATGTGTAATAGGTTGCTGCTTGGAAAGACAACCATGGGGATTGGTATGAAACAGG	93	4	Sub	N/A
691	TTTATATGTAAGAGAGTTTGTATACAATGAAATAGTATATGTGTAACAGGTTGCTGCTTGGAAAGACAAGGATGGGGATTGGTATGAAACAGG	TTTATATGTAAGAGAGTTTGTATACAATGAAATAGTATATGTGTAATAGGTTGCTGCTTGGAAAGACAACAATGGGGATTGGTATGAAACAGG	93	4	Sub	N/A
692	TTTATATGTAAGAGAGTTTGTATACAATGAAATAGTATATGTGTAACAGGTTGCTGCTTGGAAAGACAAGGATGGGGATTGGTATGAAACAGG	TTTATATGTAAGAGAGTTTGTATACAATGAAATAGTATATGTGTAACAGGTTGCTGCTTGGAAAGA----GATGGGGATTGGTATGAAACAGG	89	4	del	N/A
693	TTTATATGTAAGAGAGTTTGTATACAATGAAATAGTATATGTGTAACAGGTTGCTGCTTGGAAAGACAAGGATGGGGATTGGTATGAAACAGG	TTTATATGTAAGAGAGTTTGTATACAATGAAATAGTATATGTGTAATAGGTTCCTGCTTGGAAAGACAAGGATGGGGATTAGTATGAAACAGG	93	4	Sub	N/A
694	TTTATATGTAAGAGAGTTTGTATACAATGAAATAGTATATGTGTAACAGGTTGCTGCTTGGAAAGACAAGGATGGGGATTGGTATGAAACAGG	TTTATATGTAAGAGAGTTTGTATACAATGAAATAGTATATGTGTAACAGGTTGCTGCTTGGAAAGAGGAGGATGGGGGTTGGTATGAAACAGG	93	4	Sub	N/A
695	TTTATATGTAAGAGAGTTTGTATACAATGAAATAGTATATGTGTAACAGGTTGCTGCTTGGAAAGACAAGGATGGGGATTGGTATGAAACAGG	TTTATATGTAAGAGCGTTTGTATACAATGAAATAGTATATGTGTAACAGGTTGCTGCTTGGAAAGACAAGGATGGGGATTGGTATGAAACATG	93	4	Sub	N/A
696	TTTATATGTAAGAGAGTTTGTATACAATGAAATAGTATATGTGTAACAGGTTGCTGCTTGGAAAGACAAGGATGGGGATTGGTATGAAACAGG	TTTATATGTAAGAGAGTTTGTATACAATGAAATAGTATATGTGTAACAGGTTGCTGCCTGGAAAGACAAGGATGGGGATTGGTATGACACAGG	93	4	Sub	N/A
697	TTTATATGTAAGAGAGTTTGTATACAATGAAATAGTATATGTGTAACAGGTTGCTGCTTGGAAAGACAAGGATGGGGATTGGTATGAAACAGG	TTTATATGTAAGAGAGTTTGTATACAATGAAATAGTATATGTGTAACCGGTTGCTGCTTGGAAAGACAAGGATGGGGATTGGTATGATACAGG	93	4	Sub	N/A
698	TTTATATGTAAGAGAGTTTGTATACAATGAAATAGTATATGTGTAACAGGTTGCTGCTTGGAAAGACAAGGATGGGGATTGGTATGAAACAGG	TTTATATGTAAGAGAGTTTGTATACAATGAAATAGTATATGTGTAACGGGTTGCTGCTTGGAAAGACAAGGATGGGGATTGGTATGAAACAGC	93	4	Sub	N/A
699	TTTATATGTAAGAGAGTTTGTATACAATGAAATAGTATATGTGTAACAGGTTGCTGCTTGGAAAGACAAGGATGGGGATTGGTATGAAACAGG	TTTATATGTAAGAGAGTTTGTATACCATGAAATAGTATATGTGTAACAGGTTGCTGCTTGGAAAGACAAGGATGGGGATTCGTATGAAACAGG	93	4	Sub	N/A
700	TTTATATGTAAGAGAGTTTGTATACAATGAAATAGTATATGTGTAACAGGTTGCTGCTTGGAAAGACAAGGATGGGGATTGGTATGAAACAGG	TTTATATGTAAGAGAGTTTGTATACAATGAAATAGTATATGTGTAATAGGTTGCTGCTTGGAAAGACATGGATGGGGATTGGTATGAAACATG	93	4	Sub	N/A
701	TTTATATGTAAGAGAGTTTGTATACAATGAAATAGTATATGTGTAACAGGTTGCTGCTTGGAAAGACAAGGATGGGGATTGGTATGAAACAGG	TTTATATGTAAGAGAGTTTGTATACAATGAAATAGTATATGTGTAATAGGTTGCTGCTTGGAAAGACATGGATGGGGATTGGTATGAAACAAG	93	4	Sub	N/A
702	TTTATATGTAAGAGAGTTTGTATACAATGAAATAGTATATGTGTAACAGGTTGCTGCTTGGAAAGACAAGGATGGGGATTGGTATGAAACAGG	TTTATATGTAAGAGAGTTTGTATACAATGAAATAGTATATGTGTAACAGGTTGCTGCTTGGACAGACACGGATGGGGATTGGTATGAAACATG	93	4	Sub	N/A
703	TTTATATGTAAGAGAGTTTGTATACAATGAAATAGTATATGTGTAACAGGTTGCTGCTTGGAAAGACAAGGATGGGGATTGGTATGAAACAGG	TTTATATGTAAGAGAGTTTGTATACAATGAAATAGTATATGTGTAACAGGTTGCTGCTTGGATAGACACGGATGGGGATTGGTATGAAACACG	93	4	Sub	N/A
704	TTTATATGTAAGAGAGTTTGTATACAATGAAATAGTATATGTGTAACAGGTTGCTGCTTGGAAAGACAAGGATGGGGATTGGTATGAAACAGG	TTTATATGTAAGAGAGTTTGTATACAATGAAATAGTATATGTGTAACAGGTTGCTGCTTGGAAACAC----ATGGGGATTGGTATGAAACACG	89	4	del	N/A
705	TTTATATGTAAGAGAGTTTGTATACAATGAAATAGTATATGTGTAACAGGTTGCTGCTTGGAAAGACAAGGATGGGGATTGGTATGAAACAGG	TTTATATGTAAGAGAGTTTGTATACAATGAAATAGTATATGTGTAACAGGTGGCTGCTTGGAAAGACAAGGATGGGGATTAGTATGAAACAGG	93	4	Sub	N/A
706	TTTATATGTAAGAGAGTTTGTATACAATGAAATAGTATATGTGTAACAGGTTGCTGCTTGGAAAGACAAGGATGGGGATTGGTATGAAACAGG	TTTATATGTAAGAGAGTTTGTATACAATGAAATAGTATATGTGTAACAGGTTGCTGCTTGGAAAGACAGGGATGGGGATTGGTGTGAAACAGG	93	4	Sub	N/A
707	TTTATATGTAAGAGAGTTTGTATACAATGAAATAGTATATGTGTAACAGGTTGCTGCTTGGAAAGACAAGGATGGGGATTGGTATGAAACAGG	TTTATATGTAAGAGAGTTTGTATACAATGAAATAGTATATGTGTAACAGGTTCCTGCTTGGAAAGAAAAGGATGGGGATTAGTATGAAACAGG	93	4	Sub	N/A
708	TTTATATGTAAGAGAGTTTGTATACAATGAAATAGTATATGTGTAACAGGTTGCTGCTTGGAAAGACAAGGATGGGGATTGGTATGAAACAGG	TTTATATGTAAGAGAGTTTGTATACAATGAAATAGTATATGTGTAACTGGTTGCTGCTTGGAAAGAAAAGGATGGGGATTAGTATGAAACAGG	93	4	Sub	N/A
709	TTTATATGTAAGAGAGTTTGTATACAATGAAATAGTATATGTGTAACAGGTTGCTGCTTGGAAAGACAAGGATGGGGATTGGTATGAAACAGG	TTTATATGTAAGAGAGTTTGTATACAATGAAATAGTATATGTGTAATAGGTTGCTGCTTGGAAAGACAAGGATGGGGGTTAGTATGAAACAGG	93	4	Sub	N/A
710	TTTATATGTAAGAGAGTTTGTATACAATGAAATAGTATATGTGTAACAGGTTGCTGCTTGGAAAGACAAGGATGGGGATTGGTATGAAACAGG	TTTATATGTAAGAGAGTTTGTATATAATGAAATAGTATATGTGTAACAGGTTGCTGCTTGGAAAGACAAGGATGGGGATTAGTATGAAACAGG	93	4	Sub	N/A
711	TTTATATGTAAGAGAGTTTGTATACAATGAAATAGTATATGTGTAACAGGTTGCTGCTTGGAAAGACAAGGATGGGGATTGGTATGAAACAGG	TTTATATGTAAGAGAGTTTGTATACAATGAAATCGTATATGTGTAATAGGTTGCTGCTTGGAAAGACAAGGATGGGGATTCGTATGAAACAGG	93	4	Sub	N/A
712	TTTATATGTAAGAGAGTTTGTATACAATGAAATAGTATATGTGTAACAGGTTGCTGCTTGGAAAGACAAGGATGGGGATTGGTATGAAACAGG	TTTATATGTAAGAGAGTTTGTATACAATGAAATAGTATATGTGTAACAGGTTACTGCTTGGAAAGACAAGGATGGGGATTCGTATGAAACAGG	93	4	Sub	N/A
713	TTTATATGTAAGAGAGTTTGTATACAATGAAATAGTATATGTGTAACAGGTTGCTGCTTGGAAAGACAAGGATGGGGATTGGTATGAAACAGG	TTTATATGTAAGAGAGTTTGTATACAATGAAATAGTATATGTGTAACAGGTTTCTGCTTGGAAAGACAAGGATGGGGATTGGTATGAAACAAG	93	4	Sub	N/A
714	TTTATATGTAAGAGAGTTTGTATACAATGAAATAGTATATGTGTAACAGGTTGCTGCTTGGAAAGACAAGGATGGGGATTGGTATGAAACAGG	TTTATATGTAAGAGAGTTTGTATACAATGAAATAGTATATGTGTAACAGGTTCCTGCTTGGAAAGACCAGGATGGGGCTTGGTATGAAACAGG	93	4	Sub	N/A
715	TTTATATGTAAGAGAGTTTGTATACAATGAAATAGTATATGTGTAACAGGTTGCTGCTTGGAAAGACAAGGATGGGGATTGGTATGAAACAGG	TTTATATGTAAGAGAGTTTGTATACAATGAAATAGTATATGTGTAACAGGTTCCTGCTTGGAAAGACAAGGATGGGGCTTGGTATGAAACAGG	93	4	Sub	N/A
716	TTTATATGTAAGAGAGTTTGTATACAATGAAATAGTATATGTGTAACAGGTTGCTGCTTGGAAAGACAAGGATGGGGATTGGTATGAAACAGG	TTTATATGTAAGAGAGTTTGTATACAATGAAATAGTATATGTGTAACAGGTTGCTGCTTGGAAAGACAAGGATGGGGGTTGGTATGAAACACG	93	4	Sub	N/A
717	TTTATATGTAAGAGAGTTTGTATACAATGAAATAGTATATGTGTAACAGGTTGCTGCTTGGAAAGACAAGGATGGGGATTGGTATGAAACAGG	TTTATATGTAAGAGAGTTTGTATACAATGAAATAGTATATGTGTAATAGGATGCTGCTTGGAAAGACAAGGATGGGGATTGGTATGAAACAGG	93	4	Sub	N/A
718	TTTATATGTAAGAGAGTTTGTATACAATGAAATAGTATATGTGTAACAGGTTGCTGCTTGGAAAGACAAGGATGGGGATTGGTATGAAACAGG	TTTATATGTAAGAGAGTTTGTATACAATGAAATAGTATATGTGTAACAGGTTGCTGCTTGGAAAGAGAAGGATGGGGATTGGTCTGAAACAGG	93	4	Sub	N/A
719	TTTATATGTAAGAGAGTTTGTATACAATGAAATAGTATATGTGTAACAGGTTGCTGCTTGGAAAGACAAGGATGGGGATTGGTATGAAACAGG	TTTATATGTAAGAGAGTTTGTATACAATGAAATAGTATATGTGTAATAGGTTGCTGCTTGGAAAGACAAGGATGGGGCTTGGTATGACACAGG	93	4	Sub	N/A
720	TTTATATGTAAGAGAGTTTGTATACAATGAAATAGTATATGTGTAACAGGTTGCTGCTTGGAAAGACAAGGATGGGGATTGGTATGAAACAGG	TTTATATGTAAGAGAGTTTGTATACAATGAAATAGTATATGTGTAACAGGTTGCTGCTTGGGAAGAAAAGGATGGGGATTGGTATGAAACAGG	93	4	Sub	N/A
721	TTTATATGTAAGAGAGTTTGTATACAATGAAATAGTATATGTGTAACAGGTTGCTGCTTGGAAAGACAAGGATGGGGATTGGTATGAAACAGG	TTTATATGTAAGAGAGTTTGTATACAATGAAATAGTATATGTGTAACAGGTTGCTGCTTGGTAAGACAAGGATGGGGATTGGTATGACACAGG	93	4	Sub	N/A
722	TTTATATGTAAGAGAGTTTGTATACAATGAAATAGTATATGTGTAACAGGTTGCTGCTTGGAAAGACAAGGATGGGGATTGGTATGAAACAGG	TTTATATGTAAGAGAGTTTGTATACAATGAAATAGTATATGTGTAATAGGTTGCTGCTTGGAAAGACTAGGATGGGGATTAGTATGAAACAGG	93	4	Sub	N/A
723	TTTATATGTAAGAGAGTTTGTATACAATGAAATAGTATATGTGTAACAGGTTGCTGCTTGGAAAGACAAGGATGGGGATTGGTATGAAACAGG	TTTATATGTAAGAGAGTTTGTATACAATGAAATAGTGTATGTGTAACAGGTTGCTGCTTGGAAAGACAAGGATGGGGATTGGTATGACACAGG	93	4	Sub	N/A
724	TTTATATGTAAGAGAGTTTGTATACAATGAAATAGTATATGTGTAACAGGTTGCTGCTTGGAAAGACAAGGATGGGGATTGGTATGAAACAGG	TTTATATGTAAGAGAGTTTGTATACAATGAAATAGTATATGTGTAACAGGTTGCTGCTTGGAAAGCCAAGGATGGGGATTAGTATGAAACAGG	93	4	Sub	N/A
725	TTTATATGTAAGAGAGTTTGTATACAATGAAATAGTATATGTGTAACAGGTTGCTGCTTGGAAAGACAAGGATGGGGATTGGTATGAAACAGG	TTTATATGTAAGAGAGTTTGTATACAATGAAATAGTATATGTGTAACAGGTTGCCGCTTGGAAAGTCAAGGATGGGGATTGGTATGAAACAGG	93	4	Sub	N/A
726	TTTATATGTAAGAGAGTTTGTATACAATGAAATAGTATATGTGTAACAGGTTGCTGCTTGGAAAGACAAGGATGGGGATTGGTATGAAACAGG	TTTATATGTAAGAGAGTTTGTATACAATGAAATAGTATATGTGTAACAGGTTGCCGCTTGGAAAGCCAAGGATGGGGATTGGTATGAAACAGG	93	4	Sub	N/A
727	TTTATATGTAAGAGAGTTTGTATACAATGAAATAGTATATGTGTAACAGGTTGCTGCTTGGAAAGACAAGGATGGGGATTGGTATGAAACAGG	TTTATATGTAAGAGAGTTTGTATACAATGAAATAGTATATGTGTAACAGGTTGCAGCTTGGCAAGGCAAGGATGGGGATTGGTATGAAACAGG	93	4	Sub	N/A
728	TTTATATGTAAGAGAGTTTGTATACAATGAAATAGTATATGTGTAACAGGTTGCTGCTTGGAAAGACAAGGATGGGGATTGGTATGAAACAGG	TTTATATGTAAGAGAGTTTGTATACAATGAAATAGTATATGTGTAATAGGTTGCAGCTTGGAAAGACAAGGATGGGGACTGGTATGAAACAGG	93	4	Sub	N/A
729	TTTATATGTAAGAGAGTTTGTATACAATGAAATAGTATATGTGTAACAGGTTGCTGCTTGGAAAGACAAGGATGGGGATTGGTATGAAACAGG	TTTATATGTAAGAGAGTTTGTATACAATGAAATAGTATATGTGTAACAGGTTGCTGCCTGGAAAGAC----ATGGGGATTGGTATGAAACAGG	89	4	del	N/A
730	TTTATATGTAAGAGAGTTTGTATACAATGAAATAGTATATGTGTAACAGGTTGCTGCTTGGAAAGACAAGGATGGGGATTGGTATGAAACAGG	TTTATATGTAAGAGAGTTTGTATACAATGAAATAGTATATGTGTAACAGGTTGCTGCTTGGGAAGCCAAGGATGGGGACTGGTATGAAACAGG	93	4	Sub	N/A
731	TTTATATGTAAGAGAGTTTGTATACAATGAAATAGTATATGTGTAACAGGTTGCTGCTTGGAAAGACAAGGATGGGGATTGGTATGAAACAGG	TTTATATGTAAGAGAGTTTGTATACAATGAAATAGTATATGTGTAACAGGTTGCTGCTTGGGAAGACAAGGATGGGGAGTGGTATGAAACAGG	93	4	Sub	N/A
732	TTTATATGTAAGAGAGTTTGTATACAATGAAATAGTATATGTGTAACAGGTTGCTGCTTGGAAAGACAAGGATGGGGATTGGTATGAAACAGG	TTTATATGTAAGAGAGTTTGTATACAATGAAATAGTATATGTGTAACAGGTTGCTGCTTGGTAAGTCAAGGATGGGGAATGGTATGAAACAGG	93	4	Sub	N/A
733	TTTATATGTAAGAGAGTTTGTATACAATGAAATAGTATATGTGTAACAGGTTGCTGCTTGGAAAGACAAGGATGGGGATTGGTATGAAACAGG	TTTATATGTAAGAGAGTTTGTATACAATGAAATAGTATATGTGTAACAGGTTGCAGCTTGGTAAGGCAAGGATGGGGAATGGTATGAAACAGG	93	4	Sub	N/A
734	TTTATATGTAAGAGAGTTTGTATACAATGAAATAGTATATGTGTAACAGGTTGCTGCTTGGAAAGACAAGGATGGGGATTGGTATGAAACAGG	TTTATATGTAAGAGAGTTTGTATACAATGAAATAGTATATGTGTAACAGGTTGCTGCTTGGTAAGGCAAGGATGGGGACTGGTATGAAACAGG	93	4	Sub	N/A
735	TTTATATGTAAGAGAGTTTGTATACAATGAAATAGTATATGTGTAACAGGTTGCTGCTTGGAAAGACAAGGATGGGGATTGGTATGAAACAGG	TTTATATGTAAGAGAGTTTGTATACAATGAAATAGTATATGTGTAATAGGTTGCCGCTTGGGAAGACAAGGATGGGGATTGGTATGAAACAGG	93	4	Sub	N/A
736	TTTATATGTAAGAGAGTTTGTATACAATGAAATAGTATATGTGTAACAGGTTGCTGCTTGGAAAGACAAGGATGGGGATTGGTATGAAACAGG	TTTATATGTAAGAGAGTTTGTATACAATGAAATAGTATATGTGTAACAGGTTGCAGCTTGGGAAGACAAGGATGGGGACTGGTATGAAACAGG	93	4	Sub	N/A
737	TTTATATGTAAGAGAGTTTGTATACAATGAAATAGTATATGTGTAACAGGTTGCTGCTTGGAAAGACAAGGATGGGGATTGGTATGAAACAGG	TTTATATGTAAGAGAGTTTGTATACAATGAAATAGTATATGTGTAACAGGTTGCTGCTTGGGAAGACAAGGATGGGGAATGGTATGAAACAGG	93	4	Sub	N/A
738	TTTATATGTAAGAGAGTTTGTATACAATGAAATAGTATATGTGTAACAGGTTGCTGCTTGGAAAGACAAGGATGGGGATTGGTATGAAACAGG	TTTATATGTAAGAGAGTTTGTATACAATGAAATAGTATATGTGTAACAGGTTGCTGCTTGGGAAGACAAGGATGGGGATTAGTATGAAACAGG	93	4	Sub	N/A
739	TTTATATGTAAGAGAGTTTGTATACAATGAAATAGTATATGTGTAACAGGTTGCTGCTTGGAAAGACAAGGATGGGGATTGGTATGAAACAGG	TTTATATGTAAGAGAGTTTGTATACAATGAAATAGTATATGTGTAACAGGTTGCCGCTTGGTAAGACAAGGATGGGGACTGGTATGAAACAGG	93	4	Sub	N/A
740	TTTATATGTAAGAGAGTTTGTATACAATGAAATAGTATATGTGTAACAGGTTGCTGCTTGGAAAGACAAGGATGGGGATTGGTATGAAACAGG	TTTATATGTCAGAGAGTTTGTATACAATGAAATAGTATATGTGTAACAGGTTGCTGCTTGGCAAGACAAGGATGGGGATTGGTATGAAACAGG	93	4	Sub	N/A
741	TTTATATGTAAGAGAGTTTGTATACAATGAAATAGTATATGTGTAACAGGTTGCTGCTTGGAAAGACAAGGATGGGGATTGGTATGAAACAGG	TTTATATGTGAGAGAGTTTGTATACAATGAAATAGTATATGTGTAACAGGTTGCTGCTTGGGAAGACAAGGATGGGGATTGGTATGAAACAGG	93	4	Sub	N/A
742	TTTATATGTAAGAGAGTTTGTATACAATGAAATAGTATATGTGTAACAGGTTGCTGCTTGGAAAGACAAGGATGGGGATTGGTATGAAACAGG	TTTATATGTAAGAGAGTTTGTATACAATGAAATAGTATATGTGTAATAGGTTGCAGCTTGGAAAGACAAGGATGGGGAATGGTATGAAACAGG	93	4	Sub	N/A
743	TTTATATGTAAGAGAGTTTGTATACAATGAAATAGTATATGTGTAACAGGTTGCTGCTTGGAAAGACAAGGATGGGGATTGGTATGAAACAGG	TTTATATGTAAGAGAGTTTGTATACAATGAAATAGTATATGTGTAACAGGTTGCTGCTTGCAAAGACAAGGATGGGGATTGGTTTGAAACAGG	93	4	Sub	N/A
744	TTTATATGTAAGAGAGTTTGTATACAATGAAATAGTATATGTGTAACAGGTTGCTGCTTGGAAAGACAAGGATGGGGATTGGTATGAAACAGG	TTTATATGTAAGAGAGTTTGTATACAATGAAATAGTATATGTGTAACAGGTTGCTGCTTGAAAAGACAAGGATGGGGATTGGTCTGAAACAGG	93	4	Sub	N/A
745	TTTATATGTAAGAGAGTTTGTATACAATGAAATAGTATATGTGTAACAGGTTGCTGCTTGGAAAGACAAGGATGGGGATTGGTATGAAACAGG	TTTATATGTAAGAGAGTTTGTATACAATGAAATAGTATATGTGTAATCGATTGCTGCTTGGAAAGACAAGGATGGGGATTGGTATGAAACAGG	93	4	Sub	N/A
746	TTTATATGTAAGAGAGTTTGTATACAATGAAATAGTATATGTGTAACAGGTTGCTGCTTGGAAAGACAAGGATGGGGATTGGTATGAAACAGG	TTTATATGTAAGAGAGTTTGTATACAATGAAATAGTATATGTGTAACTGCATGCTGCTTGGAAAGACAAGGATGGGGATTGGTATGAAACAGG	93	4	Sub	N/A
747	TTTATATGTAAGAGAGTTTGTATACAATGAAATAGTATATGTGTAACAGGTTGCTGCTTGGAAAGACAAGGATGGGGATTGGTATGAAACAGG	TTTATATGTAAGAGAGTTTGTATACAATGAAATAGTATATGTGTAATAGCATGCTGCTTGGAAAGACAAGGATGGGGATTGGCATGAAACAGG	93	4	Sub	N/A
748	TTTATATGTAAGAGAGTTTGTATACAATGAAATAGTATATGTGTAACAGGTTGCTGCTTGGAAAGACAAGGATGGGGATTGGTATGAAACAGG	TTTATATGTAAGAGAGTTTGTATACAATGAAATAGTATATGTGTAACAGACTGCTGCTTGGAAAGACAAGGATGGGGATTGGAATGAAACAGG	93	4	Sub	N/A
749	TTTATATGTAAGAGAGTTTGTATACAATGAAATAGTATATGTGTAACAGGTTGCTGCTTGGAAAGACAAGGATGGGGATTGGTATGAAACAGG	TTTATATGTAAGAGAGTTTGTATACAATGAAATAGTATATGTGTAATAGCCTGCTGCTTGGAAAGACAAGGATGGGGATTGGAATGAAACAGG	93	4	Sub	N/A
750	TTTATATGTAAGAGAGTTTGTATACAATGAAATAGTATATGTGTAACAGGTTGCTGCTTGGAAAGACAAGGATGGGGATTGGTATGAAACAGG	TTTATATGTAAGAGAGTTTGTATACAATGAAATAGTATATGTGTAACAGTTTGCTGCTTGGAAAGACAAGGATGGGGATTGGCATGAAACAGG	93	4	Sub	N/A
751	TTTATATGTAAGAGAGTTTGTATACAATGAAATAGTATATGTGTAACAGGTTGCTGCTTGGAAAGACAAGGATGGGGATTGGTATGAAACAGG	TTTATATGTAAGAGAGTTTGTATACAATGAAATAGTATATGTGTAATAGCGTGCTGCTTGGAAAGACAAGGATGGGGATTGGAATGAAACAGG	93	4	Sub	N/A
752	TTTATATGTAAGAGAGTTTGTATACAATGAAATAGTATATGTGTAACAGGTTGCTGCTTGGAAAGACAAGGATGGGGATTGGTATGAAACAGG	TTTATATGTAAGAGAGTTTGTATACAATGAAATAGTATATGTGTAATAGCCTGCTGCTTGGAAAGACAAGGATGGGGATTGGGATGAAACAGG	93	4	Sub	N/A
753	TTTATATGTAAGAGAGTTTGTATACAATGAAATAGTATATGTGTAACAGGTTGCTGCTTGGAAAGACAAGGATGGGGATTGGTATGAAACAGG	TTTATATGTAAGAGAGTTTGTATACAATGAAATAGTATATGTGTAACAGTATGCTGCTTGGAAAGACAAGGATGGGGATTGGAATGAAACAGG	93	4	Sub	N/A
754	TTTATATGTAAGAGAGTTTGTATACAATGAAATAGTATATGTGTAACAGGTTGCTGCTTGGAAAGACAAGGATGGGGATTGGTATGAAACAGG	TTTATATGTAAGAGAGTTTGTATACAATGAAATAGTATATGTGTAACAGTATGCTGCTTGGAAAGACAAGGATGGGGATTGGCATGAAACAGG	93	4	Sub	N/A
755	TTTATATGTAAGAGAGTTTGTATACAATGAAATAGTATATGTGTAACAGGTTGCTGCTTGGAAAGACAAGGATGGGGATTGGTATGAAACAGG	TTTATATGTAAGAGAGTTTGTATACAATGAAATAGTATATGTGTAATAGTCTGCTGCTTGGAAAGACAAGGATGGGGATTGGCATGAAACAGG	93	4	Sub	N/A
756	TTTATATGTAAGAGAGTTTGTATACAATGAAATAGTATATGTGTAACAGGTTGCTGCTTGGAAAGACAAGGATGGGGATTGGTATGAAACAGG	TTTATATGTAAGAGAGATTGTATACAATGAAATAGTATATGTGTAACAGGTTGCTGCTTGGAAAGACAAGGATGGGGATTCGTATGAAACAGG	93	4	Sub	N/A
757	TTTATATGTAAGAGAGTTTGTATACAATGAAATAGTATATGTGTAACAGGTTGCTGCTTGGAAAGACAAGGATGGGGATTGGTATGAAACAGG	TTTATATGTAAGAGAGTTTGTATACAATGAAATAGTATATGTGTTATA-GTTGCTGCTTGGAAAGACAAGGATGGGGATTCGTATGAAACAGG	92	4	del	N/A
758	TTTATATGTAAGAGAGTTTGTATACAATGAAATAGTATATGTGTAACAGGTTGCTGCTTGGAAAGACAAGGATGGGGATTGGTATGAAACAGG	TTTATATGTAAGAGAGTTTGTATACAATGAAATAGTATATGTGTAATAGGTTGCTGCTTCCAAAGACAAGGATGGGGATTGGTATGAAACAGG	93	4	Sub	N/A
759	TTTATATGTAAGAGAGTTTGTATACAATGAAATAGTATATGTGTAACAGGTTGCTGCTTGGAAAGACAAGGATGGGGATTGGTATGAAACAGG	TTTATATGTAAGAGAGTTTGTATACAATGAAATAGTATATGTGTAATAGGTTGCTGCTTTTAAAGACAAGGATGGGGATTGGTATGAAACAGG	93	4	Sub	N/A
760	TTTATATGTAAGAGAGTTTGTATACAATGAAATAGTATATGTGTAACAGGTTGCTGCTTGGAAAGACAAGGATGGGGATTGGTATGAAACAGG	TTTATATGTAAGAGAGTTTGTATACAATGAAATAGTATATGTGTAACAGGTTGCTGCTTGCAAAGACAAGGATGGGGATTAGTATGAAACAGG	93	4	Sub	N/A
761	TTTATATGTAAGAGAGTTTGTATACAATGAAATAGTATATGTGTAACAGGTTGCTGCTTGGAAAGACAAGGATGGGGATTGGTATGAAACAGG	TTTATATGTAAGAGAGTTTGTATACAATGAAATAGTATATGTGTAATAGGTTGCTGCTTGGAAAGACAAGGATGGGGCTTGGTATGAAACACG	93	4	Sub	N/A
762	TTTATATGTAAGAGAGTTTGTATACAATGAAATAGTATATGTGTAACAGGTTGCTGCTTGGAAAGACAAGGATGGGGATTGGTATGAAACAGG	TTTATATGTAAGAGAGTTTGTATACAATGAAATAGTATATGTGTAACTGGTTGCTGCTTGGAAAGATAAGGATGGGGGTTGGTATGAAACAGG	93	4	Sub	N/A
763	TTTATATGTAAGAGAGTTTGTATACAATGAAATAGTATATGTGTAACAGGTTGCTGCTTGGAAAGACAAGGATGGGGATTGGTATGAAACAGG	TTTATATGTAAGAGAGTTTGTATACAATGAAATAGTATATGTGTAATAGGTTGCTGCTTGGAAAGATTAGGATGGGGATTGGTATGAAACAGG	93	3	Sub	N/A
764	TTTATATGTAAGAGAGTTTGTATACAATGAAATAGTATATGTGTAACAGGTTGCTGCTTGGAAAGACAAGGATGGGGATTGGTATGAAACAGG	TTTATATGTAAGAGAGTTTGTATACAATGAAATAGTATATGTGTAACAGGTTGCGGATTGGAAAGACAAGGATGGGGATTGGTATGAAACAGG	93	3	Sub	N/A
765	TTTATATGTAAGAGAGTTTGTATACAATGAAATAGTATATGTGTAACAGGTTGCTGCTTGGAAAGACAAGGATGGGGATTGGTATGAAACAGG	TTTATATGTAAGAGAGTTTGTATACAATGAAATAGTATATGTGTAACAGGTTGCTGATTGGAAAGACAAGGATGGGGATTGGTATGAAACAGA	93	3	Sub	N/A
766	TTTATATGTAAGAGAGTTTGTATACAATGAAATAGTATATGTGTAACAGGTTGCTGCTTGGAAAGACAAGGATGGGGATTGGTATGAAACAGG	TTTATATGTAAGAGAGTTTGTATACAATGAAATAGTATATGTGTAACAGGTTGCTGCTTGGAAAGAACAGGATGGGGCTTGGTATGAAACAGG	93	3	Sub	N/A
767	TTTATATGTAAGAGAGTTTGTATACAATGAAATAGTATATGTGTAACAGGTTGCTGCTTGGAAAGACAAGGATGGGGATTGGTATGAAACAGG	TTTATATGTAAGAGAGTTTGTATACAATGAAATAGTATATGTGTACCAGGTTGCTGCTTGGAAAGAAAAGGATGGGGATTGGTATGAAACAGG	93	3	Sub	N/A
768	TTTATATGTAAGAGAGTTTGTATACAATGAAATAGTATATGTGTAACAGGTTGCTGCTTGGAAAGACAAGGATGGGGATTGGTATGAAACAGG	TTTATATGTAAGAGAGTTTGTATACAATGAAATAGTATATGTGTAACAGGTTGCTGCTTGGAAAGACTAGGATGGGGATTGGTATGAAACAGA	93	3	Sub	N/A
769	TTTATATGTAAGAGAGTTTGTATACAATGAAATAGTATATGTGTAACAGGTTGCTGCTTGGAAAGACAAGGATGGGGATTGGTATGAAACAGG	TTTATATGTAAGAGAGTTTGTATACAATGAAATAGTATATGTGTAACAGGTTGCTGCTTGGAAAGACCAGGATGGGGATTGGTATGAAAAAGG	93	3	Sub	N/A
770	TTTATATGTAAGAGAGTTTGTATACAATGAAATAGTATATGTGTAACAGGTTGCTGCTTGGAAAGACAAGGATGGGGATTGGTATGAAACAGG	TTTATATGTAAGAGAGTTTGTATACAATGAAATAGTATATGTGTAACAGGTTGCTGCTTGGAATGAC----ATGGGGATTGGTATGAAACAGG	89	3	del	N/A
771	TTTATATGTAAGAGAGTTTGTATACAATGAAATAGTATATGTGTAACAGGTTGCTGCTTGGAAAGACAAGGATGGGGATTGGTATGAAACAGG	TTTATATGTAAGAGAGTTTGTATACAATGAAATAGTATATGTGTAATAGGTTGCTGCTTGGAAAGAC----ATGGGGATTGGTATGACACAGG	89	3	del	N/A
772	TTTATATGTAAGAGAGTTTGTATACAATGAAATAGTATATGTGTAACAGGTTGCTGCTTGGAAAGACAAGGATGGGGATTGGTATGAAACAGG	TTTATATGTAAGAGAGTTTGTATACAATGAAATAGTATATGTGTAACAGGTTGCTGCTTGGAAAGAC----ATGGGGATTGGTACGAAACAGG	89	3	del	N/A
773	TTTATATGTAAGAGAGTTTGTATACAATGAAATAGTATATGTGTAACAGGTTGCTGCTTGGAAAGACAAGGATGGGGATTGGTATGAAACAGG	TTTATATGTAAGAGAGTTTGTATACAATGAAATAGTATATGTGTAATAGGTTGCTGCTTGGAAAGACACGGATGGGGATTGGTATGACACAGG	93	3	Sub	N/A
774	TTTATATGTAAGAGAGTTTGTATACAATGAAATAGTATATGTGTAACAGGTTGCTGCTTGGAAAGACAAGGATGGGGATTGGTATGAAACAGG	TTTATATGTAAGAGAGTTTGTATACAATGAAATAGTATATGTGTAACAGGTTGCGGCTTGGAAAGACAAGGATGGGGATTGATATGAAACAGG	93	3	Sub	N/A
775	TTTATATGTAAGAGAGTTTGTATACAATGAAATAGTATATGTGTAACAGGTTGCTGCTTGGAAAGACAAGGATGGGGATTGGTATGAAACAGG	TTTATATGTAAGAGAGTTTGTATACAATGAAATAGTATATGTGTAACAGGTTGATGCTTGGAAAGATAAGGATGGGGATTGGTATGAAACAGG	93	3	Sub	N/A
776	TTTATATGTAAGAGAGTTTGTATACAATGAAATAGTATATGTGTAACAGGTTGCTGCTTGGAAAGACAAGGATGGGGATTGGTATGAAACAGG	TTTATATGTAAGAGAGTTTGTATACAATGAAATAGTATATGTGTAACAGGTTACTGCTTGGAAAGACACGGATGGGGATTGGTATGAAACAGG	93	3	Sub	N/A
777	TTTATATGTAAGAGAGTTTGTATACAATGAAATAGTATATGTGTAACAGGTTGCTGCTTGGAAAGACAAGGATGGGGATTGGTATGAAACAGG	TTTATATGTAAGAGAGTTTGTATACAATGAAATAGTATATGTGTAATAGGTTGCTGCTTGGACAGACACGGATGGGGATTGGTATGAAACAGG	93	3	Sub	N/A
778	TTTATATGTAAGAGAGTTTGTATACAATGAAATAGTATATGTGTAACAGGTTGCTGCTTGGAAAGACAAGGATGGGGATTGGTATGAAACAGG	TTTATATGTAAGAGAGTTTGTATACAATGAAATAGTATATGTGTAACCGGTTGCTGCTTGGAAAGACCAGGATGGGGATTCGTATGAAACAGG	93	3	Sub	N/A
779	TTTATATGTAAGAGAGTTTGTATACAATGAAATAGTATATGTGTAACAGGTTGCTGCTTGGAAAGACAAGGATGGGGATTGGTATGAAACAGG	TTTATATGTAAGAGAGTTTGTATACAATGAAATAGTATATGTGTAACAGGTTGCTGCTTGGAAAGACAATGATGGGGATTCGTATGAAACAGG	93	3	Sub	N/A
780	TTTATATGTAAGAGAGTTTGTATACAATGAAATAGTATATGTGTAACAGGTTGCTGCTTGGAAAGACAAGGAT--------------------------------GGGGATTGGTATGAAACAGG	TTTATATGTAAGAGAGTTTGTATACAATGAAATAGTATATGTGTAATAGGTTGCTGCTTGGAAAGACAAGGATGGGGATTGGTATGAAAGGGGATTGGTATGAAAGGGGATTGGTATGAAACAGG	125	3	Ins	N/A
781	TTTATATGTAAGAGAGTTTGTATACAATGAAATAGTATATGTGTAACAGGTTGCTGCTTGGAAAGACAAGGATGGGGATTGGTATGAAACAGG	TTTATATGTAAGAGAGTTTGTATACAATGAAATAGTATATGTGTAACAGGTTGCTGCTTGGAAAGAGAAAGATGGGGATTGGTATGAAACAGG	93	3	Sub	N/A
782	TTTATATGTAAGAGAGTTTGTATACAATGAAATAGTATATGTGTAACAGGTTGCTGCTTGGAAAGACAAGGATGGGGATTGGTATGAAACAGG	TTTATATGTAAGAGAGTTTGTATACCATGAAATAGTATATGTGTAACAGGTTGCTGCTTGGAAAGAAAAGGATGGGGATTAGTATGAAACAGG	93	3	Sub	N/A
783	TTTATATGTAAGAGAGTTTGTATACAATGAAATAGTATATGTGTAACAGGTTGCTGCTTGGAAAGACAAGGATGGGGATTGGTATGAAACAGG	TTTATATGTAAGAGAGTTTGTATACAATGAAATAGTATATGTGTAACAGGTTGCTGCTTGGAACGAC----ATGGGGATTGGTATGAAACAGG	89	3	del	N/A
784	TTTATATGTAAGAGAGTTTGTATACAATGAAATAGTATATGTGTAACAGGTTGCTGCTTGGAAAGACAAGGATGGGGATTGGTATGAAACAGG	TTTATATGTAAGAGAGTTTGTATACAATGAAATAGTATATGTGTAACAGGTTGCTGCTTGGAAAGACAAGGATGGGGTTTCGTATGAAACAGG	93	3	Sub	N/A
785	TTTATATGTAAGAGAGTTTGTATACAATGAAATAGTATATGTGTAACAGGTTGCTGCTTGGAAAGACAAGGATGGGGATTGGTATGAAACAGG	TTTATATGTAAGAGAGTTTGAATACAATGAAATAGAATATGTGTAACAGGTTGCTGCTTGGAAAGACAAGGATGGGGATTGGTATGAAACAGG	93	3	Sub	N/A
786	TTTATATGTAAGAGAGTTTGTATACAATGAAATAGTATATGTGTAACAGGTTGCTGCTTGGAAAGACAAGGATGGGGATTGGTATGAAACAGG	TTTATATGTAAGAGAGTTTGTATACAATGAAATAGTATATGTGTAATAGGTTGCTGCTTGGAAAGACAAGGATGGGGTTTGGTATGAGACAGG	93	3	Sub	N/A
787	TTTATATGTAAGAGAGTTTGTATACAATGAAATAGTATATGTGTAACAGGTTGCTGCTTGGAAAGACAAGGATGGGGATTGGTATGAAACAGG	TTTATATGTAAGAGAGTTTGTATATAATGGAATAGTATATGTGTAACGGGTTGCTGCTTGGAAAGACAAGGATGGGGATTGGTATGAAACAGG	93	3	Sub	N/A
788	TTTATATGTAAGAGAGTTTGTATACAATGAAATAGTATATGTGTAACAGGTTGCTGCTTGGAAAGACAAGGATGGGGATTGGTATGAAACAGG	TTTATATGTAAGAGAGTTTGTATACAATGGAATAGTATATGTGTAACAGGTTGCTGCTTGGAAAGAC----ATGGGGATTGGTATGAAACAGG	89	3	del	N/A
789	TTTATATGTAAGAGAGTTTGTATACAATGAAATAGTATATGTGTAACAGGTTGCTGCTTGGAAAGACAAGGATGGGGATTGGTATGAAACAGG	TTTATATGTAAGAGAGTTTGTATACAATGAAATAGTATATGTGTAACCGGTTGCTGCTTGGAAAGAGCAGGATGGGGATTGGTATGAAACAGG	93	3	Sub	N/A
790	TTTATATGTAAGAGAGTTTGTATACAATGAAATAGTATATGTGTAACAGGTTGCTGCTTGGAAAGACAAGGATGGGGATTGGTATGAAACAGG	TTTATATGTAAGAGAGTTTGTATACAATGAAATAGTATATGTGTAACAGGTTGCGGCTTGGAAAGAC----ATGGGGATTGGTATGAAACAGG	89	3	del	N/A
791	TTTATATGTAAGAGAGTTTGTATACAATGAAATAGTATATGTGTAACAGGTTGCTGCTTGGAAAGACAAGGATGGGGATTGGTATGAAACAGG	TTTATATGTAAGAGAGTTTGTATACAAGGAAATAGTATATGTGTAACAGGTTGCTGCTTGGAAAGAAAAGGATGGGGATTGGTATGAAACAGG	93	3	Sub	N/A
792	TTTATATGTAAGAGAGTTTGTATACAATGAAATAGTATATGTGTAACAGGTTGCTGCTTGGAAAGACAAGGATGGGGATTGGTATGAAACAGG	TTTATATGTAAGAGAGTTTGTATACAATGAAATAGTATATGTGTAATAGGTTGCTGCTTGGAAAGAAAAGGATGGGGGTTGGTATGAAACAGG	93	3	Sub	N/A
793	TTTATATGTAAGAGAGTTTGTATACAATGAAATAGTATATGTGTAACAGGTTGCTGCTTGGAAAGACAAGGATGGGGATTGGTATGAAACAGG	TTTATATGTAAGAGAGTTTGTATACAATGAAATAGTATATGTGTAACAGGTGGATGCTTGGAAAGACAAGGATGGGGATTGGTATGAAACAGG	93	3	Sub	N/A
794	TTTATATGTAAGAGAGTTTGTATACAATGAAATAGTATATGTGTAACAGGTTGCTGCTTGGAAAGACAAGGATGGGGATTGGTATGAAACAGG	TTTATATGTAAGAGAGTTTGTATACAATGAAATAGTATATGTGTAACAGGTTGCTGCGTGGAAAGACAAGGATGGGGATTAGTATGAAACAGG	93	3	Sub	N/A
795	TTTATATGTAAGAGAGTTTGTATACAATGAAATAGTATATGTGTAACAGGTTGCTGCTTGGAAAGACAAGGATGGGGATTGGTATGAAACAGG	TTTATATGTAAGAGAGTTTGTATACAATGAAATAGTATATGTGTAACAGGTTGATGCTTGGAAAGACACGGATGGGGATTAGTATGAAACAGG	93	3	Sub	N/A
796	TTTATATGTAAGAGAGTTTGTATACAATGAAATAGTATATGTGTAACAGGTTGCTGCTTGGAAAGACAAGGATGGGGATTGGTATGAAACAGG	TTTATATGTAAGAGAGTTTGTATACAATGAAATAGTATATGTGTAATAGGTTGATGCTTGGAAAGAAAAGGATGGGGATTGGTATGAAACAGG	93	3	Sub	N/A
797	TTTATATGTAAGAGAGTTTGTATACAATGAAATAGTATATGTGTAACAGGTTGCTGCTTGGAAAGACAAGGATGGGGATTGGTATGAAACAGG	TTTATATGTAAGAGAGTTTGTATACAATGAAATAGTATATGTGTAACAGGTTGCTGCTTGGAAAGACAAGGATGGGGGTTGGTATGCAACAGG	93	3	Sub	N/A
798	TTTATATGTAAGAGAGTTTGTATACAATGAAATAGTATATGTGTAACAGGTTGCTGCTTGGAAAGACAAGGATGGGGATTGGTATGAAACAGG	TTTATATGTAAGAGAGTTTGTATACAATGAAATAGTATATGTGTAACAGGTTGCTGCGTGGAAAGACAAGGATGGGGATTGGTATGAAACACG	93	3	Sub	N/A
799	TTTATATGTAAGAGAGTTTGTATACAATGAAATAGTATATGTGTAACAGGTTGCTGCTTGGAAAGACAAGGATGGGGATTGGTATGAAACAGG	TTTATATGTAAGAGAGTTTGTATACAATGAAATAGTATATGTGTAACAGGTTGCTGCTTGGAAAGATAAGGATGGGGTTTGGTATGAAACAGG	93	3	Sub	N/A
800	TTTATATGTAAGAGAGTTTGTATACAATGAAATAGTATATGTGTAACAGGTTGCTGCTTGGAAAGACAAGGATGGGGATTGGTATGAAACAGG	TTTATATGTAAGAGAGTTTGTATACAATGAAATAGTATATGTGTAACAGGTTGCTGCTTGGAAAGAGAAGGATGGGGCTTGGTATGAAACAGG	93	3	Sub	N/A
801	TTTATATGTAAGAGAGTTTGTATACAATGAAATAGTATATGTGTAACAGGTTGCTGCTTGGAAAGACAAGGATGGGGATTGGTATGAAACAGG	TTTATATGTAAGAGAGTTTGTATACAATGAAATAGTATATGTGTAACAGGTTGCTGCTTGGAAAGACAAGGATTGGGTTTGGTATGAAACAGG	93	3	Sub	N/A
802	TTTATATGTAAGAGAGTTTGTATACAATGAAATAGTATATGTGTAACAGGTTGCTGCTTGGAAAGACAAGGATGGGGATTGGTATGAAACAGG	TTTATATGTAAGAGAGTTTGTATACAATGAAATAGTATATGTGTAACTGGTTTCTGCTTGGAAAGACAAGGATGGGGATTGGTATGAAACAGG	93	3	Sub	N/A
803	TTTATATGTAAGAGAGTTTGTATACAATGAAATAGTATATGTGTAACAGGTTGCTGCTTGGAAAGACAAGGATGGGGATTGGTATGAAACAGG	TTTATATGTAAGAGAGTTTGTATACAATGAAATAGTATATGTGTAATAGGTTGCTGCTTGGAAAGACAAGGATGGGGGTTGGTATGAAACACG	93	3	Sub	N/A
804	TTTATATGTAAGAGAGTTTGTATACAATGAAATAGTATATGTGTAACAGGTTGCTGCTTGGAAAGACAAGGATGGGGATTGGTATGAAACAGG	TTTATATGTAAGAGAGTTTGTATACAATGAAATAGTATATGTGTAACAGGTTGCTGCTTGTAAAGAGAAGGATGGGGATTGGTATGAAACAGG	93	3	Sub	N/A
805	TTTATATGTAAGAGAGTTTGTATACAATGAAATAGTATATGTGTAACAGGTTGCTGCTTGGAAAGACAAGGATGGGGATTGGTATGAAACAGG	TTTATATGTAAGAGAGTTTGTATACAATGAAATAGTATATGTGTAACAGGTTGCTACTTGGAAAGACAAGGATGGGGATTGGTATGATACAGG	93	3	Sub	N/A
806	TTTATATGTAAGAGAGTTTGTATACAATGAAATAGTATATGTGTAACAGGTTGCTGCTTGGAAAGACAAGGATGGGGATTGGTATGAAACAGG	TTTATATGTAAGAGAGTTTGTATACAATGAAATAGTATATGTGTAACAGGTTGCTGCTTGGAAAGACTAGGATGGGGATTGGTATGTAACAGG	93	3	Sub	N/A
807	TTTATATGTAAGAGAGTTTGTATACAATGAAATAGTATATGTGTAACAGGTTGCTGCTTGGAAAGACAAGGATGGGGATTGGTATGAAACAGG	TTTATATGTAAGAGAGTTTGTATACAATGAAATAGTATATGTGTAAAAGGTTGCTGCTTGGAAAGAC----ATGGGGATTGGTATGAAACAGG	89	3	del	N/A
808	TTTATATGTAAGAGAGTTTGTATACAATGAAATAGTATATGTGTAACAGGTTGCTGCTTGGAAAGACAAGGATGGGGATTGGTATGAAACAGG	TTTATATGTAAGAGAGTTTGTATACAATGAAACAGTGTATGTGTAACAGGTTGCTGCTTGGAAAGAC----ATGGGGATTGGTATGACACAGG	89	3	del	N/A
809	TTTATATGTAAGAGAGTTTGTATACAATGAAATAGTATATGTGTAACAGGTTGCTGCTTGGAAAGACAAGGATGGGGATTGGTATGAAACAGG	TTTATATGTAAGAGAGTTTGTATATAATGAAACAGTGTATGTGTAACAGGTTGCTGCTTGGAAAGAC----ATGGGGATTGGTAGGAAACAGG	89	3	del	N/A
810	TTTATATGTAAGAGAGTTTGTATACAATGAAATAGTATATGTGTAACAGGTTGCTGCTTGGAAAGACAAGGATGGGGATTGGTATGAAACAGG	TTTATATGTAAGAGAGTTTGTATACAATGAAATAGTATATGTGTAACAGGTTGCTGCTTGGAAAGAC----ACGGGGATTGGTATGAAACAGG	89	3	del	N/A
811	TTTATATGTAAGAGAGTTTGTATACAATGAAATAGTATATGTGTAACAGGTTGCTGCTTGGAAAGACAAGGATGGGGATTGGTATGAAACAGG	TTTATATGTAAGAGAGTTTGTATACAATGAAATAGTATATGTGTTATA-GTTGCTGCTTGGAAAGACAAGGATGGGGATTAGTATGAAACAGG	92	3	del	N/A
812	TTTATATGTA--AGAGAGTTTGTATACAATGAAATAGTATATGTGTAACAGGTTGCTGCTTGGAAAGACAAGGATGGGGATTGGTATGAAACAGG	TTTATATGTAAGAGAGAGTTTGTATACAATGAAATAGTATATGTGTAACAGGTTGCTGCTTGGAAAGACAAGGATGGGGATTGGTATGAAACAGG	95	3	Ins	N/A
813	TTTATATGTAAGAGAGTTTGTATACAATGAAATAGTATATGTGTAACAGGTTGCTGCTTGGAAAGACAAGGATGGGGATTGGTATGAAACAGG	TTTATATGTAAGAGAGTTTGTATACAATGAAATAGTATATGTGTAACAGGTTGCTGCTTGGAAAGAC----CTGGGGATTGGTATGAAACAGG	89	3	del	N/A
814	TTTATATGTAAGAGAGTTTGTATACAATGAAATAGTATATGTGTAACAGGTTGCTGCTTGGAAAGACAAGGATGGGGATTGGTATGAAACAGG	TTTATATGTAAGAGAGTTTGTATACAATGAAACAGTGTATGTGTAACATGTTGCTGCTTGGAAAGAC----ATGGGGATTGGTATGAAACAGG	89	3	del	N/A
815	TTTATATGTAAGAGAGTTTGTATACAATGAAATAGTATATGTGTAACAGGTTGCTGCTTGGAAAGACAAGGATGGGGATTGGTATGAAACAGG	TTTATATGTAAGAGAGTTTGTATACAATGAAATAGCATATTTGTAACAGGTTGCTGCTTGGAAAGACAAGGATGGGGATTGGTATGAAACAGG	93	3	Sub	N/A
816	TTTATATGTAAGAGAGTTTGTATACAATGAAATAGTATATGTGTAACAGGTTGCTGCTTGGAAAGACAAGGATGGGGATTGGTATGAAACAGG	TTTATATGTAAGAGAGTTTGTATACAATGAAATAGTATATGTGTAACAGGTTGCTGCTTGGAAAGACAACGATGGGGATTGGGATGAAACAGG	93	3	Sub	N/A
817	TTTATATGTAAGAGAGTTTGTATACAATGAAATAGTATATGTGTAACAGGTTGCTGCTTGGAAAGACAAGGATGGGGATTGGTATGAAACAGG	TTTATATGTAAGAGAGTTTGTATACAATGAAATAGTATATGTGTAACAGGTTGCTGCTTGGAAAGACAAGGATGGGGATTGGTATGAAAGAGG	93	3	Sub	N/A
818	TTTATATGTAAGAGAGTTTGTATACAATGAAATAGTATATGTGTAACAGGTTGCTGCTTGGAAAGACAAGGATGGGGATTGGTATGAAACAGG	TTTATATGTAAGAGAGTTTGTATACAATGAAATAGTATATGTGTAACGGGTTGCTGCTTGGAAAGAGAAGGATGGGGGTTGGTATGATACAGG	93	3	Sub	N/A
819	TTTATATGTAAGAGAGTTTGTATACAATGAAATAGTATATGTGTAACAGGTTGCTGCTTGGAAAGACAAGGATGGGGATTGGTATGAAACAGG	TTTATATGTAAGAGAGTTTGTATACAATGAAATAGTATATGTGTAACAGGTTGCTGCTAGGAAAGACAAGGATGGGGATTGGTATGAAACACG	93	3	Sub	N/A
820	TTTATATGTAAGAGAGTTTGTATACAATGAAATAGTATATGTGTAACAGGTTGCTGCTTGGAAAGACAAGGATGGGGATTGGTATGAAACAGG	TTTATATGTAAGAGAGTTTGTATACAATGAAATAGTATATGTGTAATAGGTTGCTGCTTGGAAAGAACAGGATGGGGATTAGTATGAAACAGG	93	3	Sub	N/A
821	TTTATATGTAAGAGAGTTTGTATACAATGAAATAGTATATGTGTAACAGGTTGCTGCTTGGAAAGACAAGGATGGGGATTGGTATGAAACAGG	TTTATATGTAAGAGAGTTTGTATATAATGAAATAGTATATGTGTAACAGGTTGCTGCTTGGAAAGACAAGGATGGGGATTTGTATGAAACAGG	93	3	Sub	N/A
822	TTTATATGTAAGAGAGTTTGTATACAATGAAATAGTATATGTGTAACAGGTTGCTGCTTGGAAAGACAAGGATGGGGATTGGTATGAAACAGG	TTTATATGTAAGAGAGTTTGTATACAATGAAATAGTATATGTGTAACAGGTTGCTGCTTGGAAAGATTAGGATGGGGATTAGTATGAAACAGG	93	3	Sub	N/A
823	TTTATATGTAAGAGAGTTTGTATACAATGAAATAGTATATGTGTAACAGGTTGCTGCTTGGAAAGACAAGGATGGGGATTGGTATGAAACAGG	TTTATATGTAAGAGAGTTTGTATACAATGAAATAGTATATGTGTAACAGGTTGCTGCTTGGAAGGACAAGGATGGGGATTGGGATGAAACAGG	93	3	Sub	N/A
824	TTTATATGTAAGAGAGTTTGTATACAATGAAATAGTATATGTGTAACAGGTTGCTGCTTGGAAAGACAAGGATGGGGATTGGTATGAAACAGG	TTTATATGTAAGAGAGTTTGTATACAATGAAATAGTATATGTGTAACAGGTTGCTGCTTGGAAAGAAAAGGATGGGGATTGTTATGAAACAGG	93	3	Sub	N/A
825	TTTATATGTAAGAGAGTTTGTATACAATGAAATAGTATATGTGTAACAGGTTGCTGCTTGGAAAGACAAGGATGGGGATTGGTATGAAACAGG	TTTATATGTAAGAGAGGTTGTATACAATGAAATAGTATATGTGTAACAGGTTGCTGCTTGGAAAGACAAGGATGGGGATTGGTAGGAAACAGG	93	3	Sub	N/A
826	TTTATATGTAAGAGAGTTTGTATACAATGAAATAGTATATGTGTAACAGGTTGCTGCTTGGAAAGACAAGGATGGGGATTGGTATGAAACAGG	TTTATATGTAAGAGAGTTTGTATACAATGAAATAGTATATGTGTAACAGGTTGCTGCTTGGAAAGACAAGGATGGTGATTAGTATGAAACAGG	93	3	Sub	N/A
827	TTTATATGTAAGAGAGTTTGTATACAATGAAATAGTATATGTGTAACAGGTTGCTGCTTGGAAAGACAAGGATGGGGATTGGTATGAAACAGG	TTTATATGTAAGAGAGTTTGTATACAATGAAATAGTATATGTGT-ATAGGTTGCTGCTTGGAAAGACAAGGATGGGGATTGGTATGAAACAGG	92	3	del	N/A
828	TTTATATGTAAGAGAGTTTGTATACAATGAAATAGTATATGTGTAACAGGTTGCTGCTTGGAAAGACAAGGATGGGGATTGGTATGAAACAGG	TTTATATGTAAGAGAGTTTGTATACAATGAAATAGTATATGTGTAACAGGTTGCTGCTAGGAAAGAC----ATGGGGATTGGTATGAAACAGG	89	3	del	N/A
829	TTTATATGTAAGAGAGTTTGTATACAATGAAATAGTATATGTGTAACAGGTTGCTGCTTGGAAAGACAAGGATGGGGATTGGTATGAAACAGG	TTTATATGTAAGAGAGTTTGTATACAATGAAATAGTATATGTGTAACAGGCTGATGC-TGGACATACATAGTGGGGGATTGGTATGAAACAGG	92	3	del	N/A
830	TTTATATGTAAGAGAGTTTGTATACAATGAAATAGTATATGTGTAACAGGTTGCTGCTTGGAAAGACAAGGATGGGGATTGGTATGAAACAGG	TTTATATGTAAGAGAGTTTGTATACAATGAAATAGTATATGTGTAACCGGTTGCTGCTTGGAACGACAAGGATGGGGATTGGTATGAAACAGG	93	3	Sub	N/A
831	TTTATATGTAAGAGAGTTTGTATACAATGAAATAGTATATGTGTAACAGGTTGCTGCTTGGAAAGACAAGGATGGGGATTGGTATGAAACAGG	TTTATACGTAAGAGAGTTTGTATACAATGAAATAGTATATGTGTAACGGGTTGCTGCTTGGAAAGACAAGGATGGGGATTGGTATGAAACAGG	93	3	Sub	N/A
832	TTTATATGTAAGAGAGTTTGTATACAATGAAATAGTATATGTGTAACAGGTTGCTGCTTGGAAAGACAAGGATGGGGATTGGTATGAAACAGG	TTTATATGTAAGAGAGTTTGTATACAATGAAATAGTATATGTGTAAAAGGTTGCTGCTTGGAAAGACAACGATGGGGATTGGTATGAAACAGG	93	3	Sub	N/A
833	TTTATATGTAAGAGAGTTTGTATACAATGAAATAGTATATGTGTAACAGGTTGCTGCTTGGAAAGACAAGGATGGGGATTGGTATGAAACAGG	TTTATATGTAAGAGAGTTTGTATACAATGAAATAGTATATGTGTAACAGGTTGCTGCTTGGAAGGAGAAGGATGGGGGTTGGTATGAAACAGG	93	3	Sub	N/A
834	TTTATATGTAAGAGAGTTTGTATACAATGAAATAGTATATGTGTAACAGGTTGCTGCTTGGAAAGACAAGGATGGGGATTGGTATGAAACAGG	TTTATATGTAAGAGAGTTTGTATACAATGAAATAGTATATGTGTAACGGGTTGCTGCTCGGAAAGACAAGGATGGGGATTGGTATGAAACAGG	93	3	Sub	N/A
835	TTTATATGTAAGAGAGTTTGTATACAATGAAATAGTATATGTGTAACAGGTTGCTGCTTGGAAAGACAAGGATGGGGATTGGTATGAAACAGG	TTTATATGTAAGAGAGTTTGTATACAATGAAAAAGTATATGTGTAATAGGTTGCTGCTTGGAAAGACAAGGATGGGGATTGGTATGAAACAGG	93	3	Sub	N/A
836	TTTATATGTAAGAGAGTTTGTATACAATGAAATAGTATATGTGTAACAGGTTGCTGCTTGGAAAGACAAGGATGGGGATTGGTATGAAACAGG	TTTATATGTAAGAGAGTTTGTATACAATGAAATAGTATATGTGTAACAGGTTGCTGCTTGGAAAGAAAAGGATGGGGATTGGCATGAAACAGG	93	3	Sub	N/A
837	TTTATATGTAAGAGAGTTTGTATACAATGAAATAGTATATGTGTAACAGGTTGCTGCTTGGAAAGACAAGGATGGGGATTGGTATGAAACAGG	TTTATATGTAAGAGAGTTTGTATACAATGAAATAGTATATGTGTAACAGGTTGCGGCTTGGAAAGACAAGGATGGGGATTGGTATGAAACACG	93	3	Sub	N/A
838	TTTATATGTAAGAGAGTTTGTATACAATGAAATAGTATATGTGTAACAGGTTGCTGCTTGGAAAGACAAGGATGGGGATTGGTATGAAACAGG	TTTATATGTAAGAGAGTTTGTATACAATGAAATAGTATATGTGTAACAGGTTGCTGCTTGGCAAGAC----ATGGGGATTGGTATGAAACAGG	89	3	del	N/A
839	TTTATATGTAAGAGAGTTTGTATACAATGAAATAGTATATGTGTAACAGGTTGCTGCTTGGAAAGACAAGGATGGGGATTGGTATGAAACAGG	TTTATATGTAAGAGAGTTTGTATACAATGAAATAGTATATGTGTAACTGGTTGCTGCTTGGAAAGACCAGGATGGGGATTGGTATGAAACAGG	93	3	Sub	N/A
840	TTTATATGTAAGAGAGTTTGTATACAATGAAATAGTATATGTGTAACAGGTTGCTGCTTGGAAAGACAAGGATGGGGATTGGTATGAAACAGG	TTTATATGTAAGAGAGTTTGTATACAATGAAATAGTATATGTGTAATAGGTTGCTGCTTGGAAAGACAAGGATGGGGATTGGTATGAATCAGG	93	3	Sub	N/A
841	TTTATATGTAAGAGAGTTTGTATACAATGAAATAGTATATGTGTAACAGGTTGCTGCTTGGAAAGACAAGGATGGGGATTGGTATGAAACAGG	TTTATATGTAAGAGAGTTTGTATACAATGAAATAGTATATGTGTAACAGGTTGCTGCTTGGAAAGATAATGATGGGGATTGGTATGAAACAGG	93	3	Sub	N/A
842	TTTATATGTAAGAGAGTTTGTATACAATGAAATAGTATATGTGTAACAGGTTGCTGCTTGGAAAGACAAGGATGGGGATTGGTATGAAACAGG	TTTATATGTAAGAGAGTTTGTATACAATGAAACAGTGTATGTGTAACAGGTTGCTGCTTGGAAAGAC----ATGGGGATTGGGATGAAACAGG	89	3	del	N/A
843	TTTATATGTAAGAGAGTTTGTATACAATGAAATAGTATATGTGTAACAGGTTGCTGCTTGGAAAGACAAGGATGGGGATTGGTATGAAACAGG	TTTATATGTAAGAGAGTTTGTATACAATAAAATAGTATATGTGTAACAGGTTGCTGCTTGGAAAGACAAGGATGGGGATTGGTATGCAACAGG	93	3	Sub	N/A
844	TTTATATGTAAGAGAGTTTGTATACAATGAAATAGTATATGTGTAACAGGTTGCTGCTTGGAAAGACAAGGATGGGGATTGGTATGAAACAGG	TTTATATGTAAGAGAGTTTGTATACAATGAAATAGTATATGTGTAACAGGTTGCTGCTTGGAAAGACAGGGATGGGGATGGGTATGAAACAGG	93	3	Sub	N/A
845	TTTATATGTAAGAGAGTTTGTATACAATGAAATAGTATATGTGTAACAGGTTGCTGCTTGGAAAGACAAGGATGGGGATTGGTATGAAACAGG	TTTATATGTAAGAGAGTTTGTATACAATGAAATAGTATATGTGTAACAGGTTGATGCTTGGAAAGAAAGGGATGGGGATTAGTATGAAACAGG	93	3	Sub	N/A
846	TTTATATGTAAGAGAGTTTGTATACAATGAAATAGTATATGTGTAACAGGTTGCTGCTTGGAAAGACAAGGATGGGGATTGGTATGAAACAGG	TTTATATGTAAGAGAGTTTGTATACAATGAAATAGTATATGTGTAATAGGTTGCTGCTTGGAAAGACGAGGATGGGGCTTGGTATGAAACAGG	93	3	Sub	N/A
847	TTTATATGTAAGAGAGTTTGTATACAATGAAATAGTATATGTGTAACAGGTTGCTGCTTGGAAAGACAAGGATGGGGATTGGTATGAAACAGG	TTTATATGTAAGAGAGTTTGTATACAATGAAATAGTATATGTGTAACAGGTTGCTGCTTGGAGAGACAAGGATGGGGATTAGTATGAAACAGG	93	3	Sub	N/A
848	TTTATATGTAAGAGAGTTTGTATACAATGAAATAGTATATGTGTAACAGGTTGCTGCTTGGAAAGACAAGGATGGGGATTGGTATGAAACAGG	TTTATATGTAAGAGAGTTTGTATACAATGAAATAGTATATGTGTAACAGGTTGCTGCGTGGAAAGACAAGGAGGGGGATTGGTATGAAACAGG	93	3	Sub	N/A
849	TTTATATGTAAGAGAGTTTGTATACAATGAAATAGTATATGTGTAACAGGTTGCTGCTTGGAAAGACAAGGATGGGGATTGGTATGAAACAGG	TTTATATGTAAGAGAGTTTGTATACAATGAAATAGTAGATGTGTAACAGGTTGCTGCGTGGAAAGACAAGGATGGGGATTGGTATGAAACAGG	93	3	Sub	N/A
850	TTTATATGTAAGAGAGTTTGTATACAATGAAATAGTATATGTGTAACAGGTTGCTGCTTGGAAAGACAAGGATGGGGATTGGTATGAAACAGG	TTTATATGTAAGAGAGTTTGTATACAATGAAATAGTATATGTGTAACAGGTTGC-GCTTGGAAAGACAAGGATGGGGATTGGTATGAAACAGG	92	3	del	N/A
851	TTTATATGTAAGAGAGTTTGTATACAATGAAATAGTATATGTGTAACAGGTTGCTGCTTGGAAAGACAAGGATGGGGATTGGTATGAAACAGG	TTTATATGTAAGAGAGTTTGTATACAATGAAATAGTATATGTGTAACATGTTGCTGCTTGGAAAGACAAGGATGTGGATTGGTATGAAACAGG	93	3	Sub	N/A
852	TTTATATGTAAGAGAGTTTGTATACAATGAAATAGTATATGTGTAACAGGTTGCTGCTTGGAAAGACAAGGATGGGGATTGGTATGAAACAGG	TTTATATGTAAGAGAGTTTGTATACAATGAAATAGTATATGTGTAACAGGTTGATGCCTGGAAAGACAAGGATGGGGATTGGTATGAAACAGG	93	3	Sub	N/A
853	TTTATATGTAAGAGAGTTTGTATACAATGAAATAGTATATGTGTAACAGGTTGCTGCTTGGAAAGACAAGGATGGGGATTGGTATGAAACAGG	TTTATATGTAAGAGAGTTTGTATACAATGAAATAGTATATGTGTAACGGGTTGCTGCTTGGAAAGACAAGGATGGGGATTGGTACGAAACAGG	93	3	Sub	N/A
854	TTTATATGTAAGAGAGTTTGTATACAATGAAATAGTATATGTGTAACAGGTTGCTGCTTGGAAAGACAAGGATGGGGATTGGTATGAAACAGG	TTTATATGTAAGAGAGTTTGTATACAATGAAATAGTATATGTGTAACTGGTTGCTGCTTGGAAAGATAAGGATGGGGATTGCTATGAAACAGG	93	3	Sub	N/A
855	TTTATATGTAAGAGAGTTTGTATACAATGAAATAGTATATGTGTAACAGGTTGCTGCTTGGAAAGACAAGGATGGGGATTGGTATGAAACAGG	TTTATATGTAAGAGAGTTTGTATACAATGAAATAGTATATGTGGAATAGGTTGCTGCTTGGAAAGACAAGGATGGGGATTGGTATGAAACAGG	93	3	Sub	N/A
856	TTTATATGTAAGAGAGTTTGTATACAATGAAATAGTATATGTGTAACAGGTTGCTGCTTGGAAAGACAAGGATGGGGATTGGTATGAAACAGG	TTTATATGTAAGAGAGTTTGTATACAATGAAATAGTATATGTGTAACAGGTTGCTGCTGGGAAAGACAAGGATGGGGATTGGTATGAAACAGC	93	3	Sub	N/A
857	TTTATATGTAAGAGAGTTTGTATACAATGAAATAGTATATGTGTAACAGGTTGCTGCTTGGAAAGACAAGGATGGGGATTGGTATGAAACAGG	TTTATATGTAAGAGAGTTTGTATACAATGAAATAGTATATGTGTAACAGGTGGCTACTTGGAAAGACAAGGATGGGGATTGGTATGAAACAGG	93	3	Sub	N/A
858	TTTATATGTAAGAGAGTTTGTATACAATGAAATAGTATATGTGTAACAGGTTGCTGCTTGGAAAGACAAGGATGGGGATTGGTATGAAACAGG	TTTATATGTAAGAGAGTTTGTATACAATGAAATAGTATATGTGTAACAGGTTGCTGCTTGTAAGGACAAGGATGGGGATTGGTATGAAACAGG	93	3	Sub	N/A
859	TTTATATGTAAGAGAGTTTGTATACAATGAAATAGTATATGTGTAACAGGTTGCTGCTTGGAAAGACAAGGATGGGGATTGGTATGAAACAGG	TTTATATGTAAGAGAGGTTGTATACAATGAAATAGTATATGTGTAACAGGTTGCTGCTTGGAAAGACAAGGAGGGGGATTGGTATGAAACAGG	93	3	Sub	N/A
860	TTTATATGTAAGAGAGTTTGTATACAATGAAATAGTATATGTGTAACAGGTTGCTGCTTGGAAAGACAAGGATGGGGATTGGTATGAAACAGG	TTTATATGTAAGAGAGTTTGTATACAATGAAATAGTATATGTGTAACAGGTTGCTGCTTGGCAAGACGAGGATGGGGATTGGTATGAAACAGG	93	3	Sub	N/A
861	TTTATATGTAAGAGAGTTTGTATACAATGAAATAGTATATGTGTAACAGGTTGCTGCTTGGAAAGACAAGGATGGGGATTGGTATGAAACAGG	TTTATATGTAAGATAGTTTGTATACAATGAAATAGTATATGTGTAACAGGTTGCTGCTTGGAAAGACAAGGGTGGGGATTGGTATGAAACAGG	93	3	Sub	N/A
862	TTTATATGTAAGAGAGTTTGTATACAATGAAATAGTATATGTGTAACAGGTTGCTGCTTGGAAAGACAAGGATGGGGATTGGTATGAAACAGG	TTTATATGTAAGAGAGTTTGTATACAATGAAATAGTATATGTGTAACAGGTTGCTGCTTGGAAAGAACGGGATGGGGCTTAGTATGAAACAGG	93	3	Sub	N/A
863	TTTATATGTAAGAGAGTTTGTATACAATGAAATAGTATATGTGTAACAGGTTGCTGCTTGGAAAGACAAGGATGGGGATTGGTATGAAACAGG	TTTATATGTAAGAGAGTTTGTATACAATGAAATAGTATATGTGTAACAGGTTACTGC-TGGACATACAAGGATGGGGATTGGTATGAAACAGG	92	3	del	N/A
864	TTTATATGTAAGAGAGTTTGTATACAATGAAATAGTATATGTGTAACAGGTTGCTGCTTGGAAAGACAAGGATGGGGATTGGTATGAAACAGG	TTTATATGTAAGAGAGTTTGTATACAATGAAATAGTATATGTGTAACAAGTTGCTGCTTGGAAAGACAAGTATGGGGATTGGTATGAAACAGG	93	3	Sub	N/A
865	TTTATATGTAAGAGAGTTTGTATACAATGAAATAGTATATGTGTAACAGGTTGCTGCTTGGAAAGACAAGGATGGGGATTGGTATGAAACAGG	TTTATATGTAAGAGAGTTTGTATACAATGAAATAGTATATGTGTAACAGGTTGCTGCCTGGAAAGAAAAGGATGGGGATTGGTATGAAACAGG	93	3	Sub	N/A
866	TTTATATGTAAGAGAGTTTGTATACAATGAAATAGTATATGTGTAACAGGTTGCTGCTTGGAAAGACAAGGATGGGGATTGGTATGAAACAGG	TTTATATGTAAGAGAGTTTGTATACAATGAAATAGTATATGTGTAATAGGTTGTTGCTTGGAAAGACGAGGATGGGGATTGGTATGAAACAGG	93	3	Sub	N/A
867	TTTATATGTAAGAGAGTTTGTATACAATGAAATAGTATATGTGTAACAGGTTGCTGCTTGGAAAGACAAGGATGGGGATTGGTATGAAACAGG	TTTATATGTAAGAGAGTTTGTATACAATGAAATAGTATATGTGTAACAGGTTGCTGCTTGGGAAGACAAGGATGGGGATTGGTATGAAACAGA	93	3	Sub	N/A
868	TTTATATGTAAGAGAGTTTGTATACAATGAAATAGTATATGTGTAACAGGTTGCTGCTTGGAAAGACAAGGATGGGGATTGGTATGAAACAGG	TTTATATGTAACAGAGTTT-TATATAATGAAATAGTGTATGTGTAACAGGTTGCTACTTGGAAAGACAAGGATGGGGATTGGTATGAAACAGG	92	3	del	N/A
869	TTTATATGTAAGAGAGTTTGTATACAATGAAATAGTATATGTGTAACAGGTTGCTGCTTGGAAAGACAAGGATGGGGATTGGTATGAAACAGG	TTTATATGTAAGAGAGTTTGTATACAATGAAATAGTATATGTGTAATAGGTTGCTGCTTGGAACGACAAGGATGGGGATTCGTATGAAACAGG	93	3	Sub	N/A
870	TTTATATGTAAGAGAGTTTGTATACAATGAAATAGTATATGTGTAACAGGTTGCTGCTTGGAAAGACAAGGATGGGGATTGGTATGAAACAGG	TTTATATGTAAGAGAGTTTGTAAACAATGAAATAGTATATGTGTAATAGGTTGCTGCTTGGAAAGACAAGGATGGGGATTGGTATGAAACAGG	93	3	Sub	N/A
871	TTTATATGTAAGAGAGTTTGTATACAATGAAATAGTATATGTGTAACAGGTTGCTGCTTGGAAAGACAAGGATGGGGATTGGTATGAAACAGG	TTTATATGTAAGAGAGTTTGTAAATAATGGAATAGTGTATGTGTAACGGGTTGCTGCTTGGAAAGACAAGGATGGGGATTGGTATGAAACAGG	93	3	Sub	N/A
872	TTTATATGTAAGAGAGTTTGTATACAATGAAATAGTATATGTGTAACAGGTTGCTGCTTGGAAAGACAAGGATGGGGATTGGTATGAAACAGG	TTTATATGTAAGAGAGTTTGTATATAATGAAATAGTGTATGTATAACAGGTTGCTGCTTGGAAAGACAAGGATGGGGATTGGTATGAAACAGG	93	3	Sub	N/A
873	TTTATATGTAAGAGAGTTTGTATACAATGAAATAGTATATGTGTAACAGGTTGCTGCTTGGAAAGACAAGGATGGGGATTGGTATGAAACAGG	TTTATATGTAAGAGAGTTTGTATACAATGAAATAGTATATGTGTAACAGGTTGCTGCTTGGGAAGACAAGGATGGGGATTGGTATGACACAGG	93	3	Sub	N/A
874	TTTATATGTAAGAGAGTTTGTATACAATGAAATAGTATATGTGTAACAGGTTGCTGCTTGGAAAGACAAGGATGGGGATTGGTATGAAACAGG	TTTATATGTAAGAGAGTTTGTATACAATGAAATAGTATATGTGTAACCGGTTGCTGCTTGGAAAGAAAAGGATGGGGATTCGTATGAAACAGG	93	3	Sub	N/A
875	TTTATATGTAAGAGAGTTTGTATACAATGAAATAGTATATGTGTAACAGGTTGCTGCTTGGAAAGACAAGGATGGGGATTGGTATGAAACAGG	TTTATATGTAAGAGAGGTTGTATACAATGAAATAGTATATGTGTAATAGGTTGCTGCTTGGAAAGACAAGGATGGGGATTCGTATGAAACAGG	93	3	Sub	N/A
876	TTTATATGTAAGAGAGTTTGTATACAATGAAATAGTATATGTGTAACAGGTTGCTGCTTGGAAAGACAAGGATGGGGATTGGTATGAAACAGG	TTTATATGTAAGAGAGTTTGTATACAATGAAATAGTATATGTGTAATAGGTTGCTGCTTGG-AAGACAAGGATGGGGATTGGTATGAAACAGG	92	3	del	N/A
877	TTTATATGTAAGAGAGTTTGTATACAATGAAATAGTATATGTGTAACAGGTTGCTGCTTGGAAAGACAAGGATGGGGATTGGTATGAAACAGG	TTTATATGTAAGAGAGTTTGTATAC-ATGAAATAGTATATGTGTAACAGGTTGCTGCTTGGAAAGACAAGGATGGGGATTGGTATGAAACAGG	92	3	del	N/A
878	TTTATATGTAAGAGAGTTTGTATACAATGAAATAGTATATGTGTAACAGGTTGCTGCTTGGAAAGACAAGGATGGGGATTGGTATGAAACAGG	TTTATATGTAAGAGAGTTTGTATACAATGAAATAGAATATGTGTAACAGGTTGCTGCTTGGAAAGACAAGGATGGGGATTGGAATGAAACAGG	93	3	Sub	N/A
879	TTTATATGTAAGAGAGTTTGTATACAATGAAATAGTATATGTGTAACAGGTTGCTGCTTGGAAAGACAAGGATGGGGATTGGTATGAAACAGG	TTTATATGTAAGAGAGTTTGTATACAATGAAATAGTATATGTGTAACAGGTTGCTGCTTGGAAAGACAAGGATGGGGGTTGGTGTGAAACAGG	93	3	Sub	N/A
880	TTTATATGTAAGAGAGTTTGTATACAATGAAATAGTATATGTGTAACAGGTTGCTGCTTGGAAAGACAAGGATGGGGATTGGTATGAAACAGG	TTTATATGTAAGAGAGTTTGTATACAATGAAATAGTATATGTGTAACAGGTTGCTGCTTGGAGAGGCAAGGATGGGGATTGGTATGAAACAGG	93	3	Sub	N/A
881	TTTATATGTAAGAGAGTTTGTATACAATGAAATAGTATATGTGTAACAGGTTGCTGCTTGGAAAGACAAGGATGGGGATTGGTATGAAACAGG	TTTATATGTAAGAGAGTTTGTATACAATGAAATAGTATATGTGTAATAGGTTGATGCTTGGAAAGACAAGGATGGGGATTCGTATGAAACAGG	93	3	Sub	N/A
882	TTTATATGTAAGAGAGTTTGTATACAATGAAATAGTATATGTGTAACAGGTTGCTGCTTGGAAAGACAAGGATGGGGATTGGTATGAAACAGG	TTTATATGTAAGAGAGTTTGTATACAATGAAATAGTATATGTGTAATAGGTTGCTGCTTGGAAAGATAAGGATGGGGATTTGTATGAAACAGG	93	3	Sub	N/A
883	TTTATATGTAAGAGAGTTTGTATACAATGAAATAGTATATGTGTAACAGGTTGCTGCTTGGAAAGACAAGGATGGGGATTGGTATGAAACAGG	TTTATATGTAAGAGAGTTTGTATACCATGAAATAGTATATGTGTAACAGGTTGCTGCTTGGAAAGACAAGGATGGGGATTTGTATGAAACAGG	93	3	Sub	N/A
884	TTTATATGTAAGAGAGTTTGTATACAATGAAATAGTATATGTGTAACAGGTTGCTGCTTGGAAAGACAAGGATGGGGATTGGTATGAAACAGG	TTTATATGTAAGAGAGTTTGAATATAATGGAATAGTGTATGTGTAACGGGTTGCTGCTTGGAAAGACAAGGATGGGGATTGGTATGAAACAGG	93	3	Sub	N/A
885	TTTATATGTAAGAGAGTTTGTATACAATGAAATAGTATATGTGTAACAGGTTGCTGCTTGGAAAGACAAGGATGGGGATTGGTATGAAACAGG	TTTATATGTAAGAGAGTTTGTATACAATGAAATAGTATATGTGTAAAAGGTTGCTGCTTGGAAAGACAAGGATGGGGATTGGTAGGAAACAGG	93	3	Sub	N/A
886	TTTATATGTAAGAGAGTTTGTATACAATGAAATAGTATATGTGTAACAGGTTGCTGCTTGGAAAGACAAGGATGGGGATTGGTATGAAACAGG	TTTATATGTAAGAGAGTTTGTATACAATGAAATAGTATATGTGTAACAGGTTGCTGCTTGGAAAGAGAAGGATGGGGATTGCTATGAAACAGG	93	3	Sub	N/A
887	TTTATATGTAAGAGAGTTTGTATACAATGAAATAGTATATGTGTAACAGGTTGCTGCTTGGAAAGACAAGGATGGGGATTGGTATGAAACAGG	TTTATATGTAAGAGAGTTTGTATACAATGAAATAGTATATGTGTAACAGGTTGCTTCTTGGAAAGAC----ATGGGGATTGGTATGAAACAGG	89	3	del	N/A
888	TTTATATGTAAGAGAGTTTGTATACAATGAAATAGTATATGTGTAACAGGTTGCTGCTTGGAAAGACAAGGATGGGGATTGGTATGAAACAGG	TTTATATGTAAGAGAGTTTGTATACAATGAAATAGTATATGTGTAACAGGTTGCTGCTTGGAAAAAC----ATGGGGATTGGTATGAAACAGG	89	3	del	N/A
889	TTTATATGTAAGAGAGTTTGTATACAATGAAATAGTATATGTGTAACAGGTTGCTGCTTGGAAAGACAAGGATGGGGATTGGTATGAAACAGG	TTTATATGTAAGAGAGTTTGTATACAATGAAATAGTATATGTGTAACAGGTTGCTGCTTGGAAAGACAAGTATGGGGATTGGTATGACACAGG	93	3	Sub	N/A
890	TTTATATGTAAGAGAGTTTGTATACAATGAAATAGTATATGTGTAACAGGTTGCTGCTTGGAAAGACAAGGATGGGGATTGGTATGAAACAGG	TTTATATGTAAGAGAGTTTGTATACAATGAAATAGTATATGTGTAACAGGTTGCGGGTTGGAAAGACAAGGATGGGGATTGGTATGAAACAGG	93	3	Sub	N/A
891	TTTATATGTAAGAGAGTTTGTATACAATGAAATAGTATATGTGTAACAGGTTGCTGCTTGGAAAGACAAGGATGGGGATTGGTATGAAACAGG	GTTATATGTAAGAGAGTTTGTATACAATGAAATAGTATATGTGTAATAGGTTGCTGCTTGGAAAGACAAGGATGGGGATTGGTATGAAACAGG	93	3	Sub	N/A
892	TTTATATGTAAGAGAGTTTGTATACAATGAAATAGTATATGTGTAACAGGTTGCTGCTTGGAAAGACAAGGATGGGGATTGGTATGAAACAGG	TTTATATGTAAGAGAGTTTGTATACCATGAAATAGTATATGTGTAACAGGTTGCTGCTTGGAAAGACAAGGATGGGGTTTGGTATGAAACAGG	93	3	Sub	N/A
893	TTTATATGTAAGAGAGTTTGTATACAATGAAATAGTATATGTGTAACAGGTTGCTGCTTGGAAAGACAAGGATGGGGATTGGTATGAAACAGG	TTTATATGTAAGAGAGTTTGTATACAATGAAATAGTATATGTGTAACAGGTTGCTGCTGGGAAAGATAAGGATGGGGATTGGTATGAAACAGG	93	3	Sub	N/A
894	TTTATATGTAAGAGAGTTTGTATACAATGAAATAGTATATGTGTAACAGGTTGCTGCTTGGAAAGACAAGGATGGGGATTGGTATGAAACAGG	TTGATATGTAAGAGAGTTTGTATACAATGAAATAGTAGATGTGTAACAGGTTGCTGCTTGGAAAGACAAGGATGGGGATTGGTATGAAACAGG	93	3	Sub	N/A
895	TTTATATGTAAGAGAGTTTGTATACAATGAAATAGTATATGTGTAACAGGTTGCTGCTTGGAAAGACAAGGATGGGGATTGGTATGAAACAGG	TTTATATGTAAGAGAGTTTGTATACAATGAAATAGTATATGTGTAACCGGTTGCTGCTTGGAAAGACTTGGATGGGGATTCGTATGAAACAGG	93	3	Sub	N/A
896	TTTATATGTAAGAGAGTTTGTATACAATGAAATAGTATATGTGTAACAGGTTGCTGCTTGGAAAGACAAGGATGGGGATTGGTATGAAACAGG	TTTATATGTAAGAGAGTTTGTATACAATG-AATAGTGTATGTGTAACAGGTTGCTGCTTGGAAAGACAAGGATGGGGATTGGTATGAAACAGG	92	3	del	N/A
897	TTTATATGTAAGAGAGTTTGTATACAATGAAATAGTATATGTGTAACAGGTTGCTGCTTGGAAAGACAAGGATGGGGATTGGTATGAAACAGG	TTTATATGTAAGAGAGTTTGTATATAATGAAACAGTGTATGTGTAACAGGTTGCTGCTTGGAAAGAC----ATGGGGATTGGTATGAAACAAG	89	3	del	N/A
898	TTTATATGTAAGAGAGTTTGTATACAATGAAATAGTATATGTGTAACAGGTTGCTGCTTGGAAAGACAAGGATGGGGATTGGTATGAAACAGG	TTTATATGTAAGAGAGTTTGTATACAATGAAATAGTATATGTGTAATTGGTTGCTGCTTGGAAAGACATGGATGGGGATTGGTATGAAACAGG	93	3	Sub	N/A
899	TTTATATGTAAGAGAGTTTGTATACAATGAAATAGTATATGTGTAACAGGTTGCTGCTTGGAAAGACAAGGATGGGGATTGGTATGAAACAGG	TTTATATGTAAGAGAGTTTGTATACAATGAAATAGTATATGTGTAACAGGTTGCTGATTGGAAAGACAAGGATGGGGATTGGTATGAAACACG	93	3	Sub	N/A
900	TTTATATGTAAGAGAGTTTGTATACAATGAAATAGTATATGTGTAACAGGTTGCTGCTTGGAAAGACAAGGATGGGGATTGGTATGAAACAGG	TTTATATGTAAGAGAGTTTGTATACAATGAAATAGTATATGTGTAACAGGTTGCTGCTTGGAAAGACCGGGATGGGGCTTAGTATGAAACAGG	93	3	Sub	N/A
901	TTTATATGTAAGAGAGTTTGTATACAATGAAATAGTATATGTGTAACAGGTTGCTGCTTGGAAAGACAAGGATGGGGATTGGTATGAAACAGG	TTTATATGTAAGAGAGTTTGTATACAATGAAATAGTATATGTGTAATAGGTTGCTGCTTGGAAAGACAAGGATGCGGATTGGTATGAAACAGG	93	3	Sub	N/A
902	TTTATATGTAAGAGAGTTTGTATACAATGAAATAGTATATGTGTAACAGGTTGCTGCTTGGAAAGACAAGGATGGGGATTGGTATGAAACAGG	TTTATATGTAAGAGAGTTTGTATACAATGAAATAGTATATGTGTAACAGGTTGCTGCTTGGAAAGCCAAGGATGGGGATTCGTATGAAACAGG	93	3	Sub	N/A
903	TTTATATGTAAGAGAGTTTGTATACAATGAAATAGTATATGTGTAACAGGTTGCTGCTTGGAAAGACAAGGATGGGGATTGGTATGAAACAGG	TTTATATGTAAGAGAGTTTGTATACAATGAAATAGTATATGTGTAACAGGTTGATGCTTGGAAAGACAAGGATGGGGATTGGTATGAAACATG	93	3	Sub	N/A
904	TTTATATGTAAGAGAGTTTGTATACAATGAAATAGTATATGTGTAACAGGTTGCTGCTTGGAAAGACAAGGATGGGGATTGGTATGAAACAGG	TTTATATGTAAGAGAGTTTGTATACAATGAAATAGTATATGTGTAACTGGTTGCTGCATGGAAAGACAAGGATGGGGATTGGTATGAAACAGG	93	3	Sub	N/A
905	TTTATATGTAAGAGAGTTTGTATACAATGAAATAGTATATGTGTAACAGGTTGCTGCTTGGAAAGACAAGGATGGGGATTGGTATGAAACAGG	TTTATATGTAAGAGAGTTTGTATACAATGAAATAGTATATGTGTAACCGGTTGCTGCTGGGAAAGACAAGGATGGGGATTGGTATGAAACAGG	93	3	Sub	N/A
906	TTTATATGTAAGAGAGTTTGTATACAATGAAATAGTATATGTGTAACAGGTTGCTGCTTGGAAAGACAAGGATGGGGATTGGTATGAAACAGG	TTTATATGTAAGAGAGTTTGTATACAATGAAATAGTATATGTGTAACAGGTTGCTGCTTGGAGAGACGAGGATGGGGATTGGTATGAAACAGG	93	3	Sub	N/A
907	TTTATATGTAAGAGAGTTTGTATACAATGAAATAGTATATGTGTAACAGGTTGCTGCTTGGAAAGACAAGGAT--------------------------------GGGGATTGGTATGAAACAGG	TTTATATGTAAGAGAGTTTGTATACAATGAAATAGTATATGTGTAACAGGTTGCTGCTTGGAAAGACAAGGATGGGGATTGGTATGAAAGGGGATTGGTATGAAAGGGGATTGGTATGAAACAGG	125	3	Ins	N/A
908	TTTATATGTAAGAGAGTTTGTATACAATGAAATAGTATATGTGTAACAGGTTGCTGCTTGGAAAGACAAGGATGGGGATTGGTATGAAACAGG	TTTATATGTAAGAGAGTTTGTATACAATGAAACAGTGTATGTGTAACAGGTTGCTGCTGGGAAAGAC----ATGGGGATTGGTATGAAACAGG	89	3	del	N/A
909	TTTATATGTAAGAGAGTTTGTATACAATGAAATAGTATATGTGTAACAGGTTGCTGCTTGGAAAGACAAGGATGGGGATTGGTATGAAACAGG	TTTATATGTAAGAGAGTTTGTATACAATGAAATAGTATATGTGTAACAGGTTGATGCTTGGAAAGACCAGGATGGGGATTCGTATGAAACAGG	93	3	Sub	N/A
910	TTTATATGTAAGAGAGTTTGTATACAATGAAATAGTATATGTGTAACAGGTTGCTGCTTGGAAAGACAAGGATGGGGATTGGTATGAAACAGG	TTTATATGTAAGAGAGTTTGTATACAATGAAATAGTATATGTGTAATAGGTTGCTGCTTGGAAAGACAAGGCTGGGGATTGGTATGCAACAGG	93	3	Sub	N/A
911	TTTATATGTAAGAGAGTTTGTATACAATGAAATAGTATATGTGTAACAGGTTGCTGCTTGGAAAGACAAGGATGGGGATTGGTATGAAACAGG	TTTATATGTAAGAGAGTTTGTATACAATGAAATAGTATATGTGTAACAGGTTGCTGATTGGAAAGACAAGGATGGGGATTGGTATGACACAGG	93	3	Sub	N/A
912	TTTATATGTAAGAGAGTTTGTATACAATGAAATAGTATATGTGTAACAGGTTGCTGCTTGGAAAGACAAGGATGGGGATTGGTATGAAACAGG	TTTATATGTAAGAGAGTTTGTGTACAATGAAATAGTGTATGTGTAACAGGTTGCTGCTTGGAAAGACAAGGATGGGGATTGGTATGAAACAGG	93	3	Sub	N/A
913	TTTATATGTAAGAGAGTTTGTATACAATGAAATAGTATATGTGTAACAGGTTGCTGCTTGGAAAGACAAGGATGGGGATTGGTATGAAACAGG	TTTATATGTAAGAGAGTTTGTATACAATGAAATAGTATATGTGTAACCGGTTGCTGCTTGGAAAGACCAGGATGGGGATTGGGATGAAACAGG	93	3	Sub	N/A
914	TTTATATGTAAGAGAGTTTGTATACAATGAAATAGTATATGTGTAACAGGTTGCTGCTTGGAAAGACAAGGATGGGGATTGGTATGAAACAGG	TTTATATGTAAGAGAGTTTGTATACAATGAAATAGTATATGTGTAACAGGTTGCTGCTTGGAAAGACTAGGATGGGGCTTGGTATGAAACAGG	93	3	Sub	N/A
915	TTTATATGTAAGAGAGTTTGTATACAATGAAATAGTATATGTGTAACAGGTTGCTGCTTGGAAAGACAAGGATGGGGATTGGTATGAAACAGG	TTTATATGTAAGAGAGTTTGTATACAATGAAATAGTATATGTGTAACGGGTTGCTGCTTGGAAAGACTAGGATGGGGATTGGTATGAAACAGG	93	3	Sub	N/A
916	TTTATATGTAAGAGAGTTTGTATACAATGAAATAGTATATGTGTAACAGGTTGCTGCTTGGAAAGACAAGGATGGGGATTGGTATGAAACAGG	TTTATATGTAAGAGAGTTTGTATACAAGGAAATAGTATATGTGTAATAGGTTGCTGCTTGGAAAGACAAGGATGGGGATTGGTATGAAACAGG	93	3	Sub	N/A
917	TTTATATGTAAGAGAGTTTGTATACAATGAAATAGTATATGTGTAACAGGTTGCTGCTTGGAAAGACAAGGATGGGGATTGGTATGAAACAGG	TTTATATGTAAGAGAGTTTGTATACAATGAAATAGTATAGGTGTAACAGGTTGCTGCTTGGAAAGACAAGGATGGGGATGGGTATGAAACAGG	93	3	Sub	N/A
918	TTTATATGTAAGAGAGTTTGTATACAATGAAATAGTATATGTGTAACAGGTTGCTGCTTGGAAAGACAAGGATGGGGATTGGTATGAAACAGG	TTTATATGTAAGAGAGTTTGTATACAATGAAATAGTATATGTGTAACAGGTTGCTGCTTGGAAAGAAAA----GGGGATTGGTATGAAACAGG	89	3	del	N/A
919	TTTATATGTAAGAGAGTTTGTATACAATGAAATAGTATATGTGTAACAGGTTGCTGCTTGGAAAGACAAGGATGGGGATTGGTATGAAACAGG	TTTATATGTAAGAGAGTTTGTATACAATGAAATCGTATATGTGTAACAGGTTGCTGCTTGGAAAGACGAGGATGGGGATTGGTATGAAACAGG	93	3	Sub	N/A
920	TTTATATGTAAGAGAGTTTGTATACAATGAAATAGTATATGTGTAACAGGTTGCTGCTTGGAAAGACAAGGATGGGGATTGGTATGAAACAGG	TTTATATGTAAGAGAGTTTGTATACAATGAAATAGTATATGTGTAACAGGTTGCTGCTTGGAAAGAAAAGGATGGGGATTGGTATGAACCAGG	93	3	Sub	N/A
921	TTTATATGTAAGAGAGTTTGTATACAATGAAATAGTATATGTGTAACAGGTTGCTGCTTGGAAAGACAAGGATGGGGATTGGTATGAAACAGG	TTTATATGTAAGAGAGTTTGTATACAATGAAATAGTATATGTGTAATAGGTTGCCGCTTGGAAAGACAAGGATGGGGATTGGCATGAAACAGG	93	3	Sub	N/A
922	TTTATATGTAAGAGAGTTTGTATACAATGAAATAGTATATGTGTAACAGGTTGCTGCTTGGAAAGACAAGGATGGGGATTGGTATGAAACAGG	TTTATATGTAAGAGAGTTTGTATACAATGAAATAGTATATGTGTAACAGGGTGCGGCTGGGAAAGACAAGGATGGGGATTGGTATGAAACAGG	93	3	Sub	N/A
923	TTTATATGTAAGAGAGTTTGTATACAATGAAATAGTATATGTGTAACAGGTTGCTGCTTGGAAAGACAAGGATGGGGATTGGTATGAAACAGG	TTTATATGTAAGAGAGTTTGTATACAATGAAATAGTATATGTGTAATAGGTTGCTGCTTGGAAAGACGAGGATGGGGATTGGTATGACACAGG	93	3	Sub	N/A
924	TTTATATGTAAGAGAGTTTGTATACAATGAAATAGTATATGTGTAACAGGTTGCTGCTTGGAAAGACAAGGATGGGGATTGGTATGAAACAGG	TTTATATGTAAGAGAGTTTGTATACAATGAAATAGTATATGTGTAACTGGTTGCTGCTTGGAAAGATTTGGATGGGGGTTGGTATGAGACAGG	93	3	Sub	N/A
925	TTTATATGTAAGAGAGTTTGTATACAATGAAATAGTATATGTGTAACAGGTTGCTGCTTGGAAAGACAAGGATGGGGATTGGTATGAAACAGG	TTTATATGTAAGAGAGTTTGTATACAATGAAATAGTATATGTGTAACATGTTGCTGCTTGGAAAGAC----ATGGGGATTGGTATGAAACAGG	89	3	del	N/A
926	TTTATATGTAAGAGAGTTTGTATACAATGAAATAGTATATGTGTAACAGGTTGCTGCTTGGAAAGACAAGGATGGGGATTGGTATGAAACAGG	TTTATATGTAAGAGAGTTTGTATACAATAAAATAGTATATGTGTAACAGGTTGCTGCTTGGAAAGACAAGGATGGGGATTCGTATGAAACAGG	93	3	Sub	N/A
927	TTTATATGTAAGAGAGTTTGTATACAATGAAATAGTATATGTGTAACAGGTTGCTGCTTGGAAAGACAAGGATGGGGATTGGTATGAAACAGG	TTTATATGTAAGAGAGTTTGTATACAATGAAATAGTATATGTGTAACAGGTTGGTGCTTGGAAAGACAACGATGGGGATTGGTATGAAACAGG	93	3	Sub	N/A
928	TTTATATGTAAGAGAGTTTGTATACAATGAAATAGTATATGTGTAACAGGTTGCTGCTTGGAAAGACAAGGATGGGGATTGGTATGAAACAGG	TTTATATGTAAGAGAGTTTGTATACAATGAAATAGTATATGTGTAACAGGTTGCTGCTTGGCAAGACAAGGATGGGGATTTGTATGAAACAGG	93	3	Sub	N/A
929	TTTATATGTAAGAGAGTTTGTATACAATGAAATAGTATATGTGTAACAGGTTGCTGCTTGGAAAGACAAGGATGGGGATTGGTATGAAACAGG	TTTATATGTAAGAGAGTTTGTATACAATGAAATAGGATATGTGTAATAGGTTGCTGCTTGGAAAGACAAGGATGGGGATTGGTATGAAACAGG	93	3	Sub	N/A
930	TTTATATGTAAGAGAGTTTGTATACAATGAAATAGTATATGTGTAACAGGTTGCTGCTTGGAAAGACAAGGATGGGGATTGGTATGAAACAGG	TTTATATGTAAGAGAGTTTGTATACAATGAAATAGTATATGTGTAACAGGTTGTTGCTTGGAAAGATAAGGATGGGGATTGGTATGAAACAGG	93	3	Sub	N/A
931	TTTATATGTAAGAGAGTTTGTATACAATGAAATAGTATATGTGTAACAGGTTGCTGCTTGGAAAGACAAGGATGGGGATTGGTATGAAACAGG	TTTATATGTAAGAGAGTTTGTATACAATGAAATAGTATATGTGTAACAGGTTGCTGCTTGGAACGACAAGCATGGGGATTGGTATGAAACAGG	93	3	Sub	N/A
932	TTTATATGTAAGAGAGTTTGTATACAATGAAATAGTATATGTGTAACAGGTTGCTGCTTGGAAAGACAAGGATGGGGATTGGTATGAAACAGG	TTTATATGTAAGAGAGTTTGTATACAATGAAATAGTAGATGTGTAACAGGTTGCTGCTTGGAAAGACAAGGAGGGGGATTGGTATGAAACAGG	93	3	Sub	N/A
933	TTTATATGTAAGAGAGTTTGTATACAATGAAATAGTATATGTGTAACAGGTTGCTGCTTGGAAAGACAAGGATGGGGATTGGTATGAAACAGG	TTTATATGTAAGAGACTTTGTATACAATGAAATAGTATATGTGTAATAGGTTGCTGCTTGGAAAGACAAGGATGGGGATTGGTATGAAACAGG	93	3	Sub	N/A
934	TTTATATGTAAGAGAGTTTGTATACAATGAAATAGTATATGTGTAACAGGTTGCTGCTTGGAAAGACAAGGATGGGGATTGGTATGAAACAGG	TTTATATGTAAGAGAGTTTGTATACAATGAAATAGTATATGTGTAATAGGTTGCGGCTGGGAAAGACAAGGATGGGGATTGGTATGAAACAGG	93	3	Sub	N/A
935	TTTATATGTAAGAGAGTTTGTATACAATGAAATAGTATATGTGTAACAGGTTGCTGCTTGGAAAGACAAGGATGGGGATTGGTATGAAACAGG	TTTATATGTAAGAGAGTTTGTATACAATGAAATAGTATATGTGTAACAGGTTGCGGCTGGGAAAGAC----ATGGGGATTGGTATGAAACAGG	89	3	del	N/A
936	TTTATATGTAAGAGAGTTTGTATACAATGAAATAGTATATGTGTAACAGGTTGCTGCTTGGAAAGACAAGGATGGGGATTGGTATGAAACAGG	TTTATATGTAAGAGAGTTTGTATACAATGAAATAGTATATGTGTAACAGGTTGCTGCTTGGAAAGACCGGGATGGGGATTCGTATGAAACAGG	93	3	Sub	N/A
937	TTTATATGTAAGAGAGTTTGTATACAATGAAATAGTATATGTGTAACAGGTTGCTGCTTGGAAAGACAAGGATGGGGATTGGTATGAAACAGG	TTTATATGTAAGAGAGTTTGTATACAATGAAATAGTATATGTGTAACAGGTTGCTGCTTGGAAAGACGAGGATGGGGATTGGTGTGAAACAGG	93	3	Sub	N/A
938	TTTATATGTAAGAGAGTTTGTATACAATGAAATAGTATATGTGTAACAGGTTGCTGCTTGGAAAGACAAGGATGGGGATTGGTATGAAACAGG	TTTATATGTAAGAGAGTTTGTATACAATGAAATAGTATATGTGTAATAGGTTGCTGCTTGGAAAGAC-AGGATGGGGATTGGTATGAAACAGG	92	3	del	N/A
939	TTTATATGTAAGAGAGTTTGTATACAATGAAATAGTATATGTGTAACAGGTTGCTGCTTGGAAAGACAAGGATGGGGATTGGTATGAAACAGG	TTTATATGTAAGAGAGTTTGTATACAATGAAATAGTATATGTCTAACAGGTTGCTGCTTGGAAAGAAAAGGATGGGGATTGGTATGAAACAGG	93	3	Sub	N/A
940	TTTATATGTAAGAGAGTTTGTATACAATGAAATAGTATATGTGTAACAGGTTGCTGCTTGGAAAGACAAGGATGGGGATTGGTATGAAACAGG	TTTATATGTAAGAGAGTTTGTATACAATGAAATAGTATATGTGTAACAGGTTGGTGCTTGGAAGGACAAGGATGGGGATTGGTATGAAACAGG	93	3	Sub	N/A
941	TTTATATGTAAGAGAGTTTGTATACAATGAAATAGTATATGTGTAACAGGTTGCTGCTTGGAAAGACAAGGATGGGGATTGGTATGAAACAGG	TTTATATGTAAGAGAGTTTGTATACAATGAAATAGTATATGTGTAACAGGTTGCTGCTTGGAAAGACACGGATGGGGCTTGGTATGAAACAGG	93	3	Sub	N/A
942	TTTATATGTAAGAGAGTTTGTATACAATGAAATAGTATATGTGTAACAGGTTGCTGCTTGGAAAGACAAGGATGGGGATTGGTATGAAACAGG	TTTATATGTAAGAGAGTTTGTATACAATGAAATAGTATATGTGTAACAGGTTGCTGCTTGGAAAGACAAGGATGGGGGTTGTTATGAAACAGG	93	3	Sub	N/A
943	TTTATATGTAAGAGAGTTTGTATACAATGAAATAGTATATGTGTAACAGGTTGCTGCTTGGAAAGACAAGGATGGGGATTGGTATGAAACAGG	TTTATATGTAAGAGAGTTTGTATACAATGAAATAGTATATGTGTAACAGGTTGATGCTTGGAAAGAACGGGATGGGGATTAGTATGAAACAGG	93	3	Sub	N/A
944	TTTATATGTAAGAGAGTTTGTATACAATGAAATAGTATATGTGTAACAGGTTGCTGCTTGGAAAGACAAGGATGGGGATTGGTATGAAACAGG	TTTATATGTAAGAGAGTTTGTATACAATGAAATAGTATATGTGTAATAGGTTGCGGCTTGGAAAGAGAAGGATGGGGATTGGTATGAAACAGG	93	3	Sub	N/A
945	TTTATATGTAAGAGAGTTTGTATACAATGAAATAGTATATGTGTAACAGGTTGCTGCTTGGAAAGACAAGGATGGGGATTGGTATGAAACAGG	TTTATATGTAAGAGAGTTTGTATACAATGAAATAGTATATGTGTAACGGGTTGCTGCTTGGAAAGATAAGGATGGGGATTCGTATGAAACAGG	93	3	Sub	N/A
946	TTTATATGTAAGAGAGTTTGTATACAATGAAATAGTATATGTGTAACAGGTTGCTGCTTGGAAAGACAAGGATGGGGATTGGTATGAAACAGG	TTTATATGTAAGAGAGTTTGTATACAATGAAATAGTATATGTGTAACCGGTTGCTGCTTGGAAAGAGGAGGATGGGGATTGGTATGAAACAGG	93	3	Sub	N/A
947	TTTATATGTAAGAGAGTTTGTATACAATGAAATAGTATATGTGTAACAGGTTGCTGCTTGGAAAGACAAGGATGGGGATTGGTATGAAACAGG	TTTATATGTAAGAGAGTTTGTATACAATGAAATAGTATATGTGTAACAGGTTGCTGCTTGGAAAGAAAAGGATGGGGGTTGGTCTGAAACAGG	93	3	Sub	N/A
948	TTTATATGTAAGAGAGTTTGTATACAATGAAATAGTATATGTGTAACAGGTTGCTGCTTGGAAAGACAAGGATGGGGATTGGTATGAAACAGG	TTTATATGTAAGAGAGTTTGTATACAATGAAATAGTATATGTGTAACAGGTTGTTGCTTGGAAAGACAAGGATGGGGATTGGTATGAAACACG	93	3	Sub	N/A
949	TTTATATGTAAGAGAGTTTGTATACAATGAAATAGTATATGTGTAACAGGTTGCTGCTTGGAAAGACAAGGATGGGGATTGGTATGAAACAGG	TTTATATGTAAGAGAGTTTGTATACAATGAAATAGTATATGTGTAACAGGTTGCTGCTTGGACAGACAAGGATGGGGATTAGTATGAAACAGG	93	3	Sub	N/A
950	TTTATATGTAAGAGAGTTTGTATACAATGAAATAGTATATGTGTAACAGGTTGCTGCTTGGAAAGACAAGGATGGGGATTGGTATGAAACAGG	TTTATATGTAAGAGAGTTTGTATACAATGAAATAGTATATGTGTAACAGGTTGCTGCTTGGAAAGACACGGATGGGGATTGGTCTGAAACAGG	93	3	Sub	N/A
951	TTTATATGTAAGAGAGTTTGTATACAATGAAATAGTATATGTGTAACAGGTTGCTGCTTGGAAAGACAAGGATGGGGATTGGTATGAAACAGG	TTCATATGTAAGAGAGTTTGTATACAATGAAATAGTATATGTGTAACAGGTTGCTGCTTGGAAAGACAAGGATGGGGATTAGTATGAAACAGG	93	3	Sub	N/A
952	TTTATATGTAAGAGAGTTTGTATACAATGAAATAGTATATGTGTAACAGGTTGCTGCTTGGAAAGACAAGGATGGGGATTGGTATGAAACAGG	TTTATATGTAAGAGAGTTTGTATACAATGAAATAGTATATGTGTAATAGGTTGCTGCTTGGAAAGACCAGGATGGGGATTGCTATGAAACAGG	93	3	Sub	N/A
953	TTTATATGTAAGAGAGTTTGTATACAATGAAATAGTATATGTGTAACAGGTTGCTGCTTGGAAAGACAAGGATGGGGATTGGTATGAAACAGG	TTTATATGTAAGCGAGTTTGTATACAATGAAATAGTATATGTGTAATAGGTTGCTGCTTGGAAAGACAAGGATGGGGATTGGTATGAAACAGG	93	3	Sub	N/A
954	TTTATATGTAAGAGAGTTTGTATACAATGAAATAGTATATGTGTAACAGGTTGCTGCTTGGAAAGACAAGGATGGGGATTGGTATGAAACAGG	TTTATATGTAAGAGAGTTTGTATACAATGAAATAGTATATGTGTAACAGGTTGATGCTTGGAAAGACAACGATGGGGATTGGTATGAAACAGG	93	3	Sub	N/A
955	TTTATATGTAAGAGAGTTTGTATACAATGAAATAGTATATGTGTAACAGGTTGCTGCTTGGAAAGACAAGGATGGGGATTGGTATGAAACAGG	TTTATATGTAAGAGAGTTTGTATACAATGAAATAGTATATGTGTAACAGGTTGCTGCCTGGCAAGACAAGGATGGGGATTGGTATGAAACAGG	93	3	Sub	N/A
956	TTTATATGTAAGAGAGTTTGTATACAATGAAATAGTATATGTGTAACAGGTTGCTGCTTGGAAAGACAAGGATGGGGATTGGTATGAAACAGG	TTTATATGTAAGAGAGTTTGTATACGATGAAATAGTATATGTGTAACAGGTTGCTGCTTGGAAAGAGAAGGATGGGGATTGGTATGAAACAGG	93	3	Sub	N/A
957	TTTATATGTAAGAGAGTTTGTATACAATGAAATAGTATATGTGTAACAGGTTGCTGCTTGGAAAGACAAGGATGGGGATTGGTATGAAACAGG	TTTATATGTAAGAGAGTTTGTATACAATGAACTAGTATATGTGTAATAGGTTGCTGCTTGGAAAGACAAGGATGGGGATTAGTATGAAACAGG	93	3	Sub	N/A
958	TTTATATGTAAGAGAGTTTGTATACAATGAAATAGTATATGTGTAACAGGTTGCTGCTTGGAAAGACAAGGATGGGGATTGGTATGAAACAGG	TTTATATGTAAGAGAGTTTGTATACAATGAAATAGTATATGTGTAACTGGTTGCTGCTTGGAAAGATTTGGATGGGGGTTGGTATGAAACAGG	93	3	Sub	N/A
959	TTTATATGTAAGAGAGTTTGTATACAATGAAATAGTATATGTGTAACAGGTTGCTGCTTGGAAAGACAAGGATGGGGATTGGTATGAAACAGG	TTTATATGTAAGAGAGTTTGTATACAATGAAATAGTATATGTGTAACCGGTTGTTGCTTGGAAAGACAAGGATGGGGATTGGTATGAAACAGG	93	3	Sub	N/A
960	TTTATATGTAAGAGAGTTTGTATACAATGAAATAGTATATGTGTAACAGGTTGCTGCTTGGAAAGACAAGGATGGGGATTGGTATGAAACAGG	TTTATATGTAAGAGAGTTTGTATACAATGAAATAGTATATGTGTAACCGGTTGCTGCTTGGAAAGACCAGGATGGGGATTGGTATGACACAGG	93	3	Sub	N/A
961	TTTATATGTAAGAGAGTTTGTATACAATGAAATAGTATATGTGTAACAGGTTGCTGCTTGGAAAGACAAGGATGGGGATTGGTATGAAACAGG	TTTATATGTAAGAGAGTTTGTATACAATGAACTAGTATATGTGTAACAGGTTGCTGCTTGGAAAGAAAAGGATGGGGATTGGTATGACACAGG	93	3	Sub	N/A
962	TTTATATGTAAGAGAGTTTGTATACAATGAAATAGTATATGTGTAACAGGTTGCTGCTTGGAAAGACAAGGATGGGGATTGGTATGAAACAGG	TTTATATGTAAGAGAGTTTGTATACAATGAAATAGTATATGTGTAACAGGTTGCTGCTTGGAAAGAAAAGGATGGGCATTGGTATGAAACAGG	93	3	Sub	N/A
963	TTTATATGTAAGAGAGTTTGTATACAATGAAATAGTATATGTGTAACAGGTTGCTGCTTGGAAAGACAAGGATGGGGATTGGTATGAAACAGG	TTTATATGTAAGAGAGTTTGTATACAATGAAATAGTATATGTGTAACAGGTTGCTGCTTGGAAAGACACGGATGGGGATTGGTATGAACCAGG	93	3	Sub	N/A
964	TTTATATGTAAGAGAGTTTGTATACAATGAAATAGTATATGTGTAACAGGTTGCTGCTTGGAAAGACAAGGATGGGGATTGGTATGAAACAGG	TTTATATGTAAGAGAGTTTGTATACAATGAATTAGTATATGTGTAACAGGTTGCTGCTTGGAAAGACAAGGATGGGGTTTGGTATGAAACAGG	93	3	Sub	N/A
965	TTTATATGTAAGAGAGTTTGTATACAATGAAATAGTATATGTGTAACAGGTTGCTGCTTGGAAAGACAAGGATGGGGATTGGTATGAAACAGG	TTTATATGTAAGAGAGTTTGTATACAATGAAATAGTATATGTGTAACAGGTTCCTGCTTGGAAAGACCAGGATGGGGCTTAGTATGAAACAGG	93	3	Sub	N/A
966	TTTATATGTAAGAGAGTTTGTATACAATGAAATAGTATATGTGTAACAGGTTGCTGCTTGGAAAGACAAGGATGGGGATTGGTATGAAACAGG	TTTATATGTAAGAGAGTTTGTATACAATGAAATAGTATATGTGTAACAGGTTGCTGCTTGGAAGGACAAGGATGGGGATTCGTATGAAACAGG	93	3	Sub	N/A
967	TTTATATGTAAGAGAGTTTGTATACAATGAAATAGTATATGTGTAACAGGTTGCTGCTTGGAAAGACAAGGATGGGGATTGGTATGAAACAGG	TTTATATGTAAGAGAGTTTGAATACAATGAAATAGTATATGTGTAATAGGTTGCTGCTTGGAAAGACAAGGATGGGGATTGGTATGAAACAGG	93	3	Sub	N/A
968	TTTATATGTAAGAGAGTTTGTATACAATGAAATAGTATATGTGTAACAGGTTGCTGCTTGGAAAGACAAGGATGGGGATTGGTATGAAACAGG	TTTATATGTAAGAGAGTTTGAATACAATGAAATAGTATATGTGTAACGGGTTGCTGCTTGGAAAGACAAGGATGGGGATTGGTATGAAACAGG	93	3	Sub	N/A
969	TTTATATGTAAGAGAGTTTGTATACAATGAAATAGTATATGTGTAACAGGTTGCTGCTTGGAAAGACAAGGATGGGGATTGGTATGAAACAGG	TTTATATGTAAGAGAGTTTGTATACAATGAAATAGTATATGTGTAACTGGTTGCTACTTGGAAAGACAAGGATGGGGATTGGTATGAAACAGG	93	3	Sub	N/A
970	TTTATATGTAAGAGAGTTTGTATACAATGAAATAGTATATGTGTAACAGGTTGCTGCTTGGAAAGACAAGGATGGGGATTGGTATGAAACAGG	TTTATATGTAAGAGAGTTTGTATACAATGAAATAGTATATGTGTAACAGGGTGCTGCTGGGAAAGAAAAGGATGGGGATTGGTATGAAACAGG	93	3	Sub	N/A
971	TTTATATGTAAGAGAGTTTGTATACAATGAAATAGTATATGTGTAACAGGTTGCTGCTTGGAAAGACAAGGATGGGGATTGGTATGAAACAGG	TTTATATGTAAGAGAGTTTGTATACAATGAAATAGTATATGTGTAATCGGTTGCTGCTTGGAAAGACAAGGATGGGGATTGGTCTGAAACAGG	93	3	Sub	N/A
972	TTTATATGTAAGAGAGTTTGTATACAATGAAATAGTATATGTGTAACAGGTTGCTGCTTGGAAAGACAAGGATGGGGATTGGTATGAAACAGG	TTTATATGTAAGAGAGTTTGTATACAATGAAATAGTATATGTGTAACAGGTTGCTGCTTGGAAAGACCAGGATGGGGATTGGTATGAAACATG	93	3	Sub	N/A
973	TTTATATGTAAGAGAGTTTGTATACAATGAAATAGTATATGTGTAACAGGTTGCTGCTTGGAAAGACAAGGATGGGGATTGGTATGAAACAGG	TTTATATGTAAGAGAGTTTGTATATAATGAAACAGTGTATGTGTAACAGGTTGCTGCTTGGAAAGAC----ATGGGGATTGGTATGAAACATG	89	3	del	N/A
974	TTTATATGTAAGAGAGTTTGTATACAATGAAATAGTATATGTGTAACAGGTTGCTGCTTGGAAAGACAAGGATGGGGATTGGTATGAAACAGG	TTTATATGTAAGAGAGTTTGTATACAATGAAATAGTATATGTGTAACAGGTTGCTGCTTGGAAGGAC----ATGGGGATTGGTATGAAACAGG	89	3	del	N/A
975	TTTATATGTAAGAGAGTTTGTATACAATGAAATAGTATATGTGTAACAGGTTGCTGCTTGGAAAGACAAGGATGGGGATTGGTATGAAACAGG	TTTATATGTAAGAGAGTTTGTATACAATGAAATAGTATATGTGTAACAGGTTGCGGCTTGGAAAGACAACGATGGGGATTGGTATGAAACAGG	93	3	Sub	N/A
976	TTTATATGTAAGAGAGTTTGTATACAATGAAATAGTATATGTGTAACAGGTTGCTGCTTGGAAAGACAAGGATGGGGATTGGTATGAAACAGG	TTTATATGTAAGAGAGTTTGTATACAATGAAATAGTATATGTGTAACAGGTTGCTGCTTGGAAAGACAACGATGGGGATTGGTATGACACAGG	93	3	Sub	N/A
977	TTTATATGTAAGAGAGTTTGTATACAATGAAATAGTATATGTGTAACAGGTTGCTGCTTGGAAAGACAAGGATGGGGATTGGTATGAAACAGG	TTTATATGTAAGAGAGTTTGTATACCATGAAATAGTATATGTGTAACAGGTTGCTGCTTGGAAAGACACGGATGGGGATTGGTATGAAACAGG	93	3	Sub	N/A
978	TTTATATGTAAGAGAGTTTGTATACAATGAAATAGTATATGTGTAACAGGTTGCTGCTTGGAAAGACAAGGATGGGGATTGGTATGAAACAGG	TTTATATGTAAGAGAGTTTGTATACAATGAAATAGTATATGTGTAACAGGTTGCTGCTTGGAAAGACATCGATGGGGACTGGTATGAAACAGG	93	3	Sub	N/A
979	TTTATATGTAAGAGAGTTTGTATACAATGAAATAGTATATGTGTAACAGGTTGCTGCTTGGAAAGACAAGGATGGGGATTGGTATGAAACAGG	TTTATATGTAAGAGAGTTTGTATACAATGAAATAGTATATGTGTAACAGGTTGCTGCTTGGAAAGACACCGATGGGGACTGGTATGAAACAGG	93	3	Sub	N/A
980	TTTATATGTAAGAGAGTTTGTATACAATGAAATAGTATATGTGTAACAGGTTGCTGCTTGGAAAGACAAGGATGGGGATTGGTATGAAACAGG	TTTATATGTAAGAGAGTTTGTATACAATGAAATAGTATATGTGTAACAGGTTGCTGCTTGGAAAGACAGTGATGGGGACTGGTATGAAACAGG	93	3	Sub	N/A
981	TTTATATGTAAGAGAGTTTGTATACAATGAAATAGTATATGTGTAACAGGTTGCTGCTTGGAAAGACAAGGATGGGGATTGGTATGAAACAGG	TTTATATGTAAGAGAGTTTGTATACAATGAAATAGTATATGTGTAACAGGTTGCTGCTTGGAAAGACAACTATGGGGATTGGTATGAAACAGG	93	3	Sub	N/A
982	TTTATATGTAAGAGAGTTTGTATACAATGAAATAGTATATGTGTAACAGGTTGCTGCTTGGAAAGACAAGGATGGGGATTGGTATGAAACAGG	TTTATATGTAAGAGAGTTTGTATACAATGAAATAGTATATGTGTAACAGGTTGCTGCTTGGAAAGACACTGATGGGGATTGGTATGAAACAGG	93	3	Sub	N/A
983	TTTATATGTAAGAGAGTTTGTATACAATGAAATAGTATATGTGTAACAGGTTGCTGCTTGGAAAGACAAGGATGGGGATTGGTATGAAACAGG	TTTATATGTAAGAGAGTTTGTATACAATGAAATAGTATATGTGTAACAGGTTGCTGCTTGGAAAGACAAGAATGGGGATTCGTATGAAACAGG	93	3	Sub	N/A
984	TTTATATGTAAGAGAGTTTGTATACAATGAAATAGTATATGTGTAACAGGTTGCTGCTTGGAAAGACAAGGATGGGGATTGGTATGAAACAGG	TTTATATGTAAGAGAGTTTGTATACAATGAAATAGTATATGTGTAACAGGTTGCTGCTTGGAAAGACAAGCATGGGGATTCGTATGAAACAGG	93	3	Sub	N/A
985	TTTATATGTAAGAGAGTTTGTATACAATGAAATAGTATATGTGTAACAGGTTGCTGCTTGGAAAGACAAGGATGGGGATTGGTATGAAACAGG	TTTATATGTAAGAGAGTTTGTATACAATGAAATAGTATATGTGTAACAGGTTGCTGCTTGGAAAGAGTAGGATGGGGATTGGTATGAAACATG	93	3	Sub	N/A
986	TTTATATGTAAGAGAGTTTGTATACAATGAAATAGTATATGTGTAACAGGTTGCTGCTTGGAAAGACAAGGATGGGGATTGGTATGAAACAGG	TGTATATGTAAGAGAGTTTGTATACAATGAAATAGTATATGTGTAACAGGTTGCTGCTTGGAAAGACAAGCATGGGGATTGGTATGAAACAGG	93	3	Sub	N/A
987	TTTATATGTAAGAGAGTTTGTATACAATGAAATAGTATATGTGTAACAGGTTGCTGCTTGGAAAGACAAGGATGGGGATTGGTATGAAACAGG	TTTATATGTAAGAGAGTTTGTATACAATGAAATAGTATATGTGTAACAGGTTGCTGCTTGGAAAGAGGGGGATGGGGATTGGTATGAAACAGG	93	3	Sub	N/A
988	TTTATATGTAAGAGAGTTTGTATACAATGAAATAGTATATGTGTAACAGGTTGCTGCTTGGAAAGACAAGGATGGGGATTGGTATGAAACAGG	TTTATATGTAAGAGCGTTTGTATACAATGAAATAGTATATGTGTAACAGGTTGCTGCTTGGAAAGAAAAGGATGGGGATTAGTATGAAACAGG	93	3	Sub	N/A
989	TTTATATGTAAGAGAGTTTGTATACAATGAAATAGTATATGTGTAACAGGTTGCTGCTTGGAAAGACAAGGATGGGGATTGGTATGAAACAGG	TTTATATGTAAGAGAGTTTGTATACAATGAAATAGTATATGTGTAACAGGTTGCCACTTGGAAAGACAAGGATGGGGATTGGTATGAAACAGG	93	3	Sub	N/A
990	TTTATATGTAAGAGAGTTTGTATACAATGAAATAGTATATGTGTAACAGGTTGCTGCTTGGAAAGACAAGGATGGGGATTGGTATGAAACAGG	TTTATATGTAAGAGAGTTTGTATACAATGAAATAGTATATGTGTAACCGGTTGCTGCTTGGAAAGACACGGATGGGGATTGGTATGACACAGG	93	3	Sub	N/A
991	TTTATATGTAAGAGAGTTTGTATACAATGAAATAGTATATGTGTAACAGGTTGCTGCTTGGAAAGACAAGGATGGGGATTGGTATGAAACAGG	TTTATATGTAAGAGAGTGTGTATACAATGAAATAGTATATGTGTAACAGGTTGCTGCTTGGAAAGACAAGGATGGGGATTGGTATGACACAGG	93	3	Sub	N/A
992	TTTATATGTAAGAGAGTTTGTATACAATGAAATAGTATATGTGTAACAGGTTGCTGCTTGGAAAGACAAGGATGGGGATTGGTATGAAACAGG	TTTATATGTAAGAGAGTTTGTATACAATGAAATAGTATATGTGTAACAGGTCGCTGCTTGGAAAGACAAGGACGGGGATTGGTATGAAACAGG	93	3	Sub	N/A
993	TTTATATGTAAGAGAGTTTGTATACAATGAAATAGTATATGTGTAACAGGTTGCTGCTTGGAAAGACAAGGATGGGGATTGGTATGAAACAGG	TTTATATGTAAGAGAGTTTGTATACAATGAAATAGTATATGTGTAATCGGTTGCTGCTTGGAAAGACTAGGATGGGGATTCGTATGAAACAGG	93	3	Sub	N/A
994	TTTATATGTAAGAGAGTTTGTATACAATGAAATAGTATATGTGTAACAGGTTGCTGCTTGGAAAGACAAGGATGGGGATTGGTATGAAACAGG	TTTATATGTAAGAGAGTTTGTATACAATGAAATAGTATATGTGTAACAGGTTGCTGCTTGGATAGACAAGGATGGGGATTGGTATGAAACACG	93	3	Sub	N/A
995	TTTATATGTAAGAGAGTTTGTATACAATGAAATAGTATATGTGTAACAGGTTGCTGCTTGGAAAGACAAGGATGGGGATTGGTATGAAACAGG	TTTATATGTAAGAGAGTTTGTATACAATGAAATAGTATATGTGTAACAGGTTGCTGCTTGGACAGACAGGGATGGGGATTGGTATGAAACACG	93	3	Sub	N/A
996	TTTATATGTAAGAGAGTTTGTATACAATGAAATAGTATATGTGTAACAGGTTGCTGCTTGGAAAGACAAGGATGGGGATTGGTATGAAACAGG	TTTATATGTAAGAGAGTTTGTATACAATGAAATAGTATATGTGTAACAGGTTGCTGCTTGGACAGACATGGATGGGGATTGGTATGAAACAAG	93	3	Sub	N/A
997	TTTATATGTAAGAGAGTTTGTATACAATGAAATAGTATATGTGTAACAGGTTGCTGCTTGGAAAGACAAGGATGGGGATTGGTATGAAACAGG	TTTATATGTAAGAGAGTTTGTATACAATGAAATAGTATATGTGTAACAGGTTGCTGCTTGGACAGACAGGGATGGGGATTGGTATGAAACAAG	93	3	Sub	N/A
998	TTTATATGTAAGAGAGTTTGTATACAATGAAATAGTATATGTGTAACAGGTTGCTGCTTGGAAAGACAAGGATGGGGATTGGTATGAAACAGG	TTTATATGTAAGAGAGTTTGTATACAATGAAATAGTATATGTGTAACAGGTTGCTGCTTGGAGAGACATGGATGGGGATTGGTATGAAACACG	93	3	Sub	N/A
999	TTTATATGTAAGAGAGTTTGTATACAATGAAATAGTATATGTGTAACAGGTTGCTGCTTGGAAAGACAAGGATGGGGATTGGTATGAAACAGG	TTTATATGTAAGAGAGTTTGTATACAATGAAATAGTATATGTGTAACAGGTTGCTGCTTGGATAGACAAGGATGGGGATTGGTATGAAACATG	93	3	Sub	N/A
1000	TTTATATGTAAGAGAGTTTGTATACAATGAAATAGTATATGTGTAACAGGTTGCTGCTTGGAAAGACAAGGATGGGGATTGGTATGAAACAGG	TTTATATGTAAGAGAGTTTGTATACAATGAAATAGTATATGTGTAACAGGTTGCTGCTTGGATAGACATGGATGGGGATTGGTATGAAACACG	93	3	Sub	N/A
1001	TTTATATGTAAGAGAGTTTGTATACAATGAAATAGTATATGTGTAACAGGTTGCTGCTTGGAAAGACAAGGATGGGGATTGGTATGAAACAGG	TTTATATGTAAGAGAGTTTGTATACAATGAAATAGTATATGTGTAACAGGTTGCTGCTTGGACAGACATGGATGGGGATTGGTATGAAACATG	93	3	Sub	N/A
1002	TTTATATGTAAGAGAGTTTGTATACAATGAAATAGTATATGTGTAACAGGTTGCTGCTTGGAAAGACAAGGATGGGGATTGGTATGAAACAGG	TTTATATGTAAGAGAGTTTGTATACAATGAAGTAGTATATGTGTAATAGGTTGCTGCTTGGAAAGACAAGGATGGGGATTAGTATGAAACAGG	93	3	Sub	N/A
1003	TTTATATGTAAGAGAGTTTGTATACAATGAAATAGTATATGTGTAACAGGTTGCTGCTTGGAAAGACAAGGATGGGGATTGGTATGAAACAGG	TTTATATGTAAGAGAGTTTGTATACAATGAAATAGTATATGTGTAATAGGTTGCTGCTTGGAAAGACGCGGATGGGGATTGGTATGAAACAGG	93	3	Sub	N/A
1004	TTTATATGTAAGAGAGTTTGTATACAATGAAATAGTATATGTGTAACAGGTTGCTGCTTGGAAAGACAAGGATGGGGATTGGTATGAAACAGG	TTTATATGTAAGAGAGTTTGTATACAATGAAATAGTATATGTGTAACAGGTTGCTGCTTGGAAAGACACGGATGGGGATTGGGATGAAACAGG	93	3	Sub	N/A
1005	TTTATATGTAAGAGAGTTTGTATACAATGAAATAGTATATGTGTAACAGGTTGCTGCTTGGAAAGACAAGGATGGGGATTGGTATGAAACAGG	TTTATATGTAAGAGAGTTTGTATACAATGAAATAGTATATGGGTAACAGGTTGCTGCTTGGAAAGACAAGGATGGGGATTTGTATGAAACAGG	93	3	Sub	N/A
1006	TTTATATGTAAGAGAGTTTGTATACAATGAAATAGTATATGTGTAACAGGTTGCTGCTTGGAAAGACAAGGATGGGGATTGGTATGAAACAGG	TTTATATGTAAGAGAGTTTGTATACAATGAAATAGTATATGTGTTATAGGTTGCTTCTTGGAAAGACAAGGATGGGGATTCGTATGAAACAGG	93	3	Sub	N/A
1007	TTTATATGTAAGAGAGTTTGTATACAATGAAATAGTATATGTGTAACAGGTTGCTGCTTGGAAAGACAAGGATGGGGATTGGTATGAAACAGG	TTTATATGTAAGAGAGTTTGTATACAATGAAATAGTGTATGTGTAACGGGTTGCTGCTTGGAAAGACAAGGATGGGGATTCGTATGAAACAGG	93	3	Sub	N/A
1008	TTTATATGTAAGAGAGTTTGTATACAATGAAATAGTATATGTGTAACAGGTTGCTGCTTGGAAAGACAAGGATGGGGATTGGTATGAAACAGG	TTTATATGTAAGAGAGTTTGTATACAATGAAATTGTATATGTGTAACAGGTTGCTGCTTGGAAAGACAAGGATGGGGATTCGTATGAAACAGG	93	3	Sub	N/A
1009	TTTATATGTAAGAGAGTTTGTATACAATGAAATAGTATATGTGTAACAGGTTGCTGCTTGGAAAGACAAGGATGGGGATTGGTATGAAACAGG	TTTATATGTAAGAGAGTTTGTATACAATGAAATGGTATATGTGTAACAGGTTGCTGCTTGGAAAGACAAGGATGGGGATTCGTATGAAACAGG	93	3	Sub	N/A
1010	TTTATATGTAAGAGAGTTTGTATACAATGAAATAGTATATGTGTAACAGGTTGCTGCTTGGAAAGACAAGGATGGGGATTGGTATGAAACAGG	TTTATATGTAAGAGAGTTTGTATACAATGAAATAGTATATGTGTAACAGGTTGCTGCTTGGAAAGACAAGGGTGGGGATTAGTATGAAACAGG	93	3	Sub	N/A
1011	TTTATATGTAAGAGAGTTTGTATACAATGAAATAGTATATGTGTAACAGGTTGCTGCTTGGAAAGACAAGGATGGGGATTGGTATGAAACAGG	TTTATATGTAAGAGAGTTTGTATACAATGAAATAGTATATGTCTAACAGGTTGCTGCTTGGAAAGACAAGGATGGGGATTCGTATGAAACAGG	93	3	Sub	N/A
1012	TTTATATGTAAGAGAGTTTGTATACAATGAAATAGTATATGTGTAACAGGTTGCTGCTTGGAAAGACAAGGATGGGGATTGGTATGAAACAGG	TTTATATGTAAGAGAGTTTGTATACAATGAAATAGTATATGTGTAACAGGCTGCTGCTTGGAAAGACAAGGATGGGGATTCGTATGAAACAGG	93	3	Sub	N/A
1013	TTTATATGTAAGAGAGTTTGTATACAATGAAATAGTATATGTGTAACAGGTTGCTGCTTGGAAAGACAAGGATGGGGATTGGTATGAAACAGG	TTTATATGTAAGAGAGTTTGTATACAATGAAATAGTATATGTGTAACAGGTTGATGCTTGGAAAGACAAGGATGGGGATTGGTATGAAACAGT	93	3	Sub	N/A
1014	TTTATATGTAAGAGAGTTTGTATACAATGAAATAGTATATGTGTAACAGGTTGCTGCTTGGAAAGACAAGGATGGGGATTGGTATGAAACAGG	TTTATATGTAAGAGAGTTTGTATACAATGAAATAGTATATGTGTAACCGGTTTCTGCTTGGAAAGACAAGGATGGGGATTCGTATGAAACAGG	93	3	Sub	N/A
1015	TTTATATGTAAGAGAGTTTGTATACAATGAAATAGTATATGTGTAACAGGTTGCTGCTTGGAAAGACAAGGATGGGGATTGGTATGAAACAGG	TTTATATGTAAGAGAGTTTGTATACAATGAACTAGTATATGTGTAACAGGTTGCTGCTTGGAAAGACAAGGATGGGGATTGCTATGAAACAGG	93	3	Sub	N/A
1016	TTTATATGTAAGAGAGTTTGTATACAATGAAATAGTATATGTGTAACAGGTTGCTGCTTGGAAAGACAAGGATGGGGATTGGTATGAAACAGG	TTTATATGTAAGAGAAGTTGTATACAATGAAATAGTATATGTGTAACAGGTTGCTGCTTGGAAAGACAAGGATGGGGATTGGTATGAAACAGG	93	3	Sub	N/A
1017	TTTATATGTAAGAGAGTTTGTATACAATGAAATAGTATATGTGTAACAGGTTGCTGCTTGGAAAGACAAGGATGGGGATTGGTATGAAACAGG	TTTATATGTAAGAGAGTTTGTATACAATGAACTAGTATATGTGTAACAGGTTGCTGCTTGGAAAGACAAGGATGGGGATTGGGATGAAACAGG	93	3	Sub	N/A
1018	TTTATATGTAAGAGAGTTTGTATACAATGAAATAGTATATGTGTAACAGGTTGCTGCTTGGAAAGACAAGGATGGGGATTGGTATGAAACAGG	TTTATATGTAAGAGAGTTTGTATACAATGAAATAGTATATGTGTAACTGGTTCCTGCTTGGAAAGACAAGGATGGGGATTGGTATGAAACAGG	93	3	Sub	N/A
1019	TTTATATGTAAGAGAGTTTGTATACAATGAAATAGTATATGTGTAACAGGTTGCTGCTTGGAAAGACAAGGATGGGGATTGGTATGAAACAGG	TTTATATGTAAGAGAGTTTGTATACAATGAAATATTATATGTGTAACAGGTTGCTGCTTGGAAAGACAAGGATGGGGATTGGTACGAAACAGG	93	3	Sub	N/A
1020	TTTATATGTAAGAGAGTTTGTATACAATGAAATAGTATATGTGTAACAGGTTGCTGCTTGGAAAGACAAGGATGGGGATTGGTATGAAACAGG	TTTATATGTAAGAGAGTTTGTATACAATGAAATAGTATATGTGTAACAGGTTGCTGCTTGGAAAGAAAAGGATGGGGATTGGTAAGAAACAGG	93	3	Sub	N/A
1021	TTTATATGTAAGAGAGTTTGTATACAATGAAATAGTATATGTGTAACAGGTTGCTGCTTGGAAAGACAAGGATGGGGATTGGTATGAAACAGG	TTTATATGTAAGAGAGTTTGTATATAATGAAACAGTGTATGTGTAACAGGGTGCTGCTTGGAAAGAC----ATGGGGATTGGTATGAAACAGG	89	3	del	N/A
1022	TTTATATGTAAGAGAGTTTGTATACAATGAAATAGTATATGTGTAACAGGTTGCTGCTTGGAAAGACAAGGATGGGGATTGGTATGAAACAGG	TTTATCTGTAAGAGAGTTTGTATACAATGAAATAGTATATGTGTAATAGGTTGCTGCTTGGAAAGACAAGGATGGGGATTGGTATGAAACAGG	93	3	Sub	N/A
1023	TTTATATGTAAGAGAGTTTGTATACAATGAAATAGTATATGTGTAACAGGTTGCTGCTTGGAAAGACAAGGATGGGGATTGGTATGAAACAGG	TTTATATGTAAGAGAGTTTGTATACAATGAAATAGTATATGTGTAACAGGTTCCTGCTTGGAAAGACAAGGATGGGGATTGGTATGACACAGG	93	3	Sub	N/A
1024	TTTATATGTAAGAGAGTTTGTATACAATGAAATAGTATATGTGTAACAGGTTGCTGCTTGGAAAGACAAGGATGGGGATTGGTATGAAACAGG	TTTATATGTAAGAGAGTTTGTATACAATGAAATACTATATGTGTAACAGGTTGCTGCTTGGAAAGACAAGGATGGGGATTGGTATGAAACACG	93	3	Sub	N/A
1025	TTTATATGTAAGAGAGTTTGTATACAATGAAATAGTATATGTGTAACAGGTTGCTGCTTGGAAAGACAAGGATGGGGATTGGTATGAAACAGG	TTTATATGTAAGAGAGTTTGTATGCAATGAAATAGTATATGTGTAACAGGTTGCTGCTTGGAAAGACAAGGATGGGGATTAGTATGAAACAGG	93	3	Sub	N/A
1026	TTTATATGTAAGAGAGTTTGTATACAATGAAATAGTATATGTGTAACAGGTTGCTGCTTGGAAAGACAAGGATGGGGATTGGTATGAAACAGG	TTTATATGTAAGAAAGTTTGTATATAATGAAA-AGTGTATGTGTAACAGGTTGCTGCTTGGAAAGACAAGGATGGGGATTGGTATGAAACAGG	92	3	del	N/A
1027	TTTATATGTAAGAGAGTTTGTATACAATGAAATAGTATATGTGTAACAGGTTGCTGCTTGGAAAGACAAGGATGGGGATTGGTATGAAACAGG	TTTATATGTAAGAGAGTTTGTCTACAATGAAATAGTATATGTGTAACAGGTTGCTGCTTGGAAAGAC----ATGGGGATTGGTATGAAACAGG	89	3	del	N/A
1028	TTTATATGTAAGAGAGTTTGTATACAATGAAATAGTATATGTGTAACAGGTTGCTGCTTGGAAAGACAAGGATGGGGATTGGTATGAAACAGG	TTTATATGTAAGAGAGTTTGTATACAATGAAATAGTATATGTGTAACTGGTTTCTGCTTGGAAAGACAAGGATGGGGATTGGTATGAAACACG	93	3	Sub	N/A
1029	TTTATATGTAAGAGAGTTTGTATACAATGAAATAGTATATGTGTAACAGGTTGCTGCTTGGAAAGACAAGGATGGGGATTGGTATGAAACAGG	TTTATATGTAAGAGAGTTTGTATACCATGAAATAGTATATGTGTAACAGGTTGCTGCTTGGCAAGACAAGGATGGGGATTGGTATGAAACAGG	93	3	Sub	N/A
1030	TTTATATGTAAGAGAGTTTGTATACAATGAAATAGTATATGTGTAACAGGTTGCTGCTTGGAAAGACAAGGATGGGGATTGGTATGAAACAGG	TTTATATGTAAGAGAGTTTGTATACAATGAAATAGTATATGTGTAATAGGTTGCTGCTTGGAAAGACAACGATGGGGATTAGTATGAAACAGG	93	3	Sub	N/A
1031	TTTATATGTAAGAGAGTTTGTATACAATGAAATAGTATATGTGTAACAGGTTGCTGCTTGGAAAGACAAGGATGGGGATTGGTATGAAACAGG	TTTATATGTAAGAGAGTTTGTATACAATGAAATAGTATATGTGTAACCGGTTGCTGCTTGGAAAGACAAGGATGGGGATTGGTATGAAACAGT	93	3	Sub	N/A
1032	TTTATATGTAAGAGAGTTTGTATACAATGAAATAGTATATGTGTAACAGGTTGCTGCTTGGAAAGACAAGGATGGGGATTGGTATGAAACAGG	TTTATATGTAAGAGAGTTTGTATACAATGAAATAGTATATGTGTAATAGGTTGCTGCTTGGAAAGACAAGGATGGGGCTTAGTATGAAACAGG	93	3	Sub	N/A
1033	TTTATATGTAAGAGAGTTTGTATACAATGAAATAGTATATGTGTAACAGGTTGCTGCTTGGAAAGACAAGGATGGGGATTGGTATGAAACAGG	TTTATATGTAAGAGAGTTTGTATACAATGAAATAGTATATGTGTAACAGGTTGCTGCTTGGGAAGGCAAGGATGGGGATTGGTATGAAACAGG	93	3	Sub	N/A
1034	TTTATATGTAAGAGAGTTTGTATACAATGAAATAGTATATGTGTAACAGGTTGCTGCTTGGAAAGACAAGGATGGGGATTGGTATGAAACAGG	TTTATATGTAAGAGAGTTTGTATACAATGAAATAGTATATGTGTAACAGGTTGCAGCTTGGTAAGGCAAGGATGGGGATTGGTATGAAACAGG	93	3	Sub	N/A
1035	TTTATATGTAAGAGAGTTTGTATACAATGAAATAGTATATGTGTAACAGGTTGCTGCTTGGAAAGACAAGGATGGGGATTGGTATGAAACAGG	TTTATATGTAAGAGAGTTTGTATACAATGAAATAGTATATGTGTAACAGGTTGCTGCTTGGCAAGGCAAGGATGGGGATTGGTATGAAACAGG	93	3	Sub	N/A
1036	TTTATATGTAAGAGAGTTTGTATACAATGAAATAGTATATGTGTAACAGGTTGCTGCTTGGAAAGACAAGGATGGGGATTGGTATGAAACAGG	TTTATATGTAAGAGAGTTTGTATACAATGAAATAGTATATGTGTAACAGGTTGCCGCTTGGGAAGCCAAGGATGGGGATTGGTATGAAACAGG	93	3	Sub	N/A
1037	TTTATATGTAAGAGAGTTTGTATACAATGAAATAGTATATGTGTAACAGGTTGCTGCTTGGAAAGACAAGGATGGGGATTGGTATGAAACAGG	TTTATATGTAAGAGAGTTTGTATACAATGAAATAGTATATGTGTAACAGGTTGCAGCTTGGTAAGTCAAGGATGGGGATTGGTATGAAACAGG	93	3	Sub	N/A
1038	TTTATATGTAAGAGAGTTTGTATACAATGAAATAGTATATGTGTAACAGGTTGCTGCTTGGAAAGACAAGGATGGGGATTGGTATGAAACAGG	TTTATATGTAAGAGAGTTTGTATACAATGAAATAGTATATGTGTAACAGGTTGCAGCTTGGGAAGGCAAGGATGGGGATTGGTATGAAACAGG	93	3	Sub	N/A
1039	TTTATATGTAAGAGAGTTTGTATACAATGAAATAGTATATGTGTAACAGGTTGCTGCTTGGAAAGACAAGGATGGGGATTGGTATGAAACAGG	TTTATATGTAAGAGAGTTTGTATACAATGAAATAGTATATGTGTAACAGGTTGCTGCTTGGTAAGCCAAGGATGGGGATTGGTATGAAACAGG	93	3	Sub	N/A
1040	TTTATATGTAAGAGAGTTTGTATACAATGAAATAGTATATGTGTAACAGGTTGCTGCTTGGAAAGACAAGGATGGGGATTGGTATGAAACAGG	TTTATATGTAAGAGAGTTTGTATACAATGAAATAGTATATGTGTAACAGGTTGCTGCATGGAAAGAC----ATGGGGATTGGTATGAAACAGG	89	3	del	N/A
1041	TTTATATGTAAGAGAGTTTGTATACAATGAAATAGTATATGTGTAACAGGTTGCTGCTTGGAAAGACAAGGATGGGGATTGGTATGAAACAGG	TTTATATGTAAGAGAGTTTGTATACAATGAAATAGTATATGTGTAACAGGTTGCAGCTTGGGAAGCCAAGGATGGGGAATGGTATGAAACAGG	93	3	Sub	N/A
1042	TTTATATGTAAGAGAGTTTGTATACAATGAAATAGTATATGTGTAACAGGTTGCTGCTTGGAAAGACAAGGATGGGGATTGGTATGAAACAGG	TTTATATGTAAGAGAGTTTGTATACAATGAAATAGTATATGTGTAACAGGTTGCTGCTTGGCAAGCCAAGGATGGGGAATGGTATGAAACAGG	93	3	Sub	N/A
1043	TTTATATGTAAGAGAGTTTGTATACAATGAAATAGTATATGTGTAACAGGTTGCTGCTTGGAAAGACAAGGATGGGGATTGGTATGAAACAGG	TTTATATGTAAGAGAGTTTGTATACAATGAAATAGTATATGTGTAACAGGTTGCCGCTTGGCAAGTCAAGGATGGGGAATGGTATGAAACAGG	93	3	Sub	N/A
1044	TTTATATGTAAGAGAGTTTGTATACAATGAAATAGTATATGTGTAACAGGTTGCTGCTTGGAAAGACAAGGATGGGGATTGGTATGAAACAGG	TTTATATGTAAGAGAGTTTGTATACAATGAAATAGTATATGTGTAATAGGTTGCTGCTTGGCAAGTCAAGGATGGGGATTGGTATGAAACAGG	93	3	Sub	N/A
1045	TTTATATGTAAGAGAGTTTGTATACAATGAAATAGTATATGTGTAACAGGTTGCTGCTTGGAAAGACAAGGATGGGGATTGGTATGAAACAGG	TTTATATGTAAGAGAGTTTGTATACAATGAAATAGTATATGTGTAACAGGTTGCAGCTTGGTAAGCCAAGGATGGGGACTGGTATGAAACAGG	93	3	Sub	N/A
1046	TTTATATGTAAGAGAGTTTGTATACAATGAAATAGTATATGTGTAACAGGTTGCTGCTTGGAAAGACAAGGATGGGGATTGGTATGAAACAGG	TTTATATGTAAGAGAGTTTGTATACAATGAAATAGTATATGTGTAACAGGTTGCCGCTTGGTAAGGCAAGGATGGGGATTGGTATGAAACAGG	93	3	Sub	N/A
1047	TTTATATGTAAGAGAGTTTGTATACAATGAAATAGTATATGTGTAACAGGTTGCTGCTTGGAAAGACAAGGATGGGGATTGGTATGAAACAGG	TTTATATGTAAGAGAGTTTGTATACAATGAAATAGTATATGTGTAACAGGTTGCGGCTTGGTAAGGCAAGGATGGGGACTGGTATGAAACAGG	93	3	Sub	N/A
1048	TTTATATGTAAGAGAGTTTGTATACAATGAAATAGTATATGTGTAACAGGTTGCTGCTTGGAAAGACAAGGATGGGGATTGGTATGAAACAGG	TTTATATGTAAGAGAGTTTGTATACAATGAAATAGTATATGTGTAACAGGTTGCTGCTTGGCAAGACAAGGATGGGGATTCGTATGAAACAGG	93	3	Sub	N/A
1049	TTTATATGTAAGAGAGTTTGTATACAATGAAATAGTATATGTGTAACAGGTTGCTGCTTGGAAAGACAAGGATGGGGATTGGTATGAAACAGG	TTTATATGTAAGAGAGTTTGTATACAATGAAATAGTATATGTGTAACAGGTTGCCGCTTGGTAAGTCAAGGATGGGGAATGGTATGAAACAGG	93	3	Sub	N/A
1050	TTTATATGTAAGAGAGTTTGTATACAATGAAATAGTATATGTGTAACAGGTTGCTGCTTGGAAAGACAAGGATGGGGATTGGTATGAAACAGG	TTTATATGTAAGAGAGTTTGTATACAATGAAATAGTATATGTGTAACAGGTTGCGGCTTGGGAAGGCAAGGATGGGGATTGGTATGAAACAGG	93	3	Sub	N/A
1051	TTTATATGTAAGAGAGTTTGTATACAATGAAATAGTATATGTGTAACAGGTTGCTGCTTGGAAAGACAAGGATGGGGATTGGTATGAAACAGG	TTTATATGTAAGAGAGTTTGTATACAATGAAATAGTATATGTGTAACAGGTTGCTGCTTGGTAAGCCAAGGATGGGGAATGGTATGAAACAGG	93	3	Sub	N/A
1052	TTTATATGTAAGAGAGTTTGTATACAATGAAATAGTATATGTGTAACAGGTTGCTGCTTGGAAAGACAAGGATGGGGATTGGTATGAAACAGG	TTTATATGTAAGAGAGTTTGTATACAATGAAATAGTATATGTGTAACAGGTTGCTGCTTGGGAAGACAAGGATGGGGATTTGTATGAAACAGG	93	3	Sub	N/A
1053	TTTATATGTAAGAGAGTTTGTATACAATGAAATAGTATATGTGTAACAGGTTGCTGCTTGGAAAGACAAGGATGGGGATTGGTATGAAACAGG	TTTATATGTAAGAGAGTTTGTATACAATGAAATAGTATATGTGTAACAGGTTGCTGCTTGGCAAGACAAGGATGGGGATTGGTAGGAAACAGG	93	3	Sub	N/A
1054	TTTATATGTAAGAGAGTTTGTATACAATGAAATAGTATATGTGTAACAGGTTGCTGCTTGGAAAGACAAGGATGGGGATTGGTATGAAACAGG	TTTATATGTAAGAGAGTTTGTATACAATGAAATAGTATATGTGTAACAGGTTGCTGCTTGGCAAGCCAAGGATGGGGACTGGTATGAAACAGG	93	3	Sub	N/A
1055	TTTATATGTAAGAGAGTTTGTATACAATGAAATAGTATATGTGTAACAGGTTGCTGCTTGGAAAGACAAGGATGGGGATTGGTATGAAACAGG	TTTATATGTAAGAGAGTTTGTATACAATGAAATAGTATATGTGTAATAGGTTGCCGCTTGGCAAGACAAGGATGGGGATTGGTATGAAACAGG	93	3	Sub	N/A
1056	TTTATATGTAAGAGAGTTTGTATACAATGAAATAGTATATGTGTAACAGGTTGCTGCTTGGAAAGACAAGGATGGGGATTGGTATGAAACAGG	TTTATATGTGAGAGAGTTTGTATACAATGAAATAGTATATGTGTAACAGGTTGCTGCTTGGTAAGACAAGGATGGGGATTGGTATGAAACAGG	93	3	Sub	N/A
1057	TTTATATGTAAGAGAGTTTGTATACAATGAAATAGTATATGTGTAACAGGTTGCTGCTTGGAAAGACAAGGATGGGGATTGGTATGAAACAGG	TTTATATGTAAGAGAGTTTGTATACAATGAAATAGTATATGTGTAACAGGTTGCTGCTTGGTAAGACAAGGATGGGGATTCGTATGAAACAGG	93	3	Sub	N/A
1058	TTTATATGTAAGAGAGTTTGTATACAATGAAATAGTATATGTGTAACAGGTTGCTGCTTGGAAAGACAAGGATGGGGATTGGTATGAAACAGG	TTTATATGTAAGAGAGTTTGTATACAATGAAATAGTATATGTGTAATAGGTTGCAGCTTGGCAAGACAAGGATGGGGATTGGTATGAAACAGG	93	3	Sub	N/A
1059	TTTATATGTAAGAGAGTTTGTATACAATGAAATAGTATATGTGTAACAGGTTGCTGCTTGGAAAGACAAGGATGGGGATTGGTATGAAACAGG	TTTATATGTAAGAGAGTTTGTATACAATGAAATAGTATATGTGTAACGGGTTGCCGCTTGGAAAGACAAGGATGGGGATTGGTATGAAACAGG	93	3	Sub	N/A
1060	TTTATATGTAAGAGAGTTTGTATACAATGAAATAGTATATGTGTAACAGGTTGCTGCTTGGAAAGACAAGGATGGGGATTGGTATGAAACAGG	TTTATATGTAAGAGAGTTTGTATACAATGAAATAGTATATGTGTAACAGGATGCTGCTTGGAAAGAC----ATGGGGATTGGTATGAAACAGG	89	3	del	N/A
1061	TTTATATGTAAGAGAGTTTGTATACAATGAAATAGTATATGTGTAACAGGTTGCTGCTTGGAAAGACAAGGATGGGGATTGGTATGAAACAGG	TTTATATGTAAGAGAGTTTGTATACAATGAAATAGTATATGTGTAATAGGTTGCCGCTTGGAAAGACAAGGATGGGGACTGGTATGAAACAGG	93	3	Sub	N/A
1062	TTTATATGTAAGAGAGTTTGTATACAATGAAATAGTATATGTGTAACAGGTTGCTGCTTGGAAAGACAAGGATGGGGATTGGTATGAAACAGG	TTTATATGTAAGAGAGTTTGTATACAATGAAATAGTATATGTGTAATAGGTTGCGGCTTGGAAAGACAAGGATGGGGAGTGGTATGAAACAGG	93	3	Sub	N/A
1063	TTTATATGTAAGAGAGTTTGTATACAATGAAATAGTATATGTGTAACAGGTTGCTGCTTGGAAAGACAAGGATGGGGATTGGTATGAAACAGG	TTTATATGTAAGAGAGTTTGTATACAATGAAATAGTATATGTGTAACAGGTTGCTGCTTGGAAAGCCAAGGATGGGGATTGCTATGAAACAGG	93	3	Sub	N/A
1064	TTTATATGTAAGAGAGTTTGTATACAATGAAATAGTATATGTGTAACAGGTTGCTGCTTGGAAAGACAAGGATGGGGATTGGTATGAAACAGG	TTTATATGTAAGAGAGTTTGTATACAATGAAATAGTATATGTGTAACAGGTTGCTGCCTGGAAAGACAAGGATGGGGATTGGTCTGAAACAGG	93	3	Sub	N/A
1065	TTTATATGTAAGAGAGTTTGTATACAATGAAATAGTATATGTGTAACAGGTTGCTGCTTGGAAAGACAAGGATGGGGATTGGTATGAAACAGG	TTTATATGTAAGAGAGTTTGTATACAATGAAATAGTATATGTGTAACAGGTTGCTGCTTGGAAAGAAAAGGATGGGGCTTAGTATGAAACAGG	93	3	Sub	N/A
1066	TTTATATGTAAGAGAGTTTGTATACAATGAAATAGTATATGTGTAACAGGTTGCTGCTTGGAAAGACAAGGATGGGGATTGGTATGAAACAGG	TTTATATGTAAGAGAGTTTGTATACAATGAAACAGTGTATGTGTAACAGGTTGCTGCTTGGAAAGACAAGGATGGGGATTGGTATGACACAGG	93	3	Sub	N/A
1067	TTTATATGTAAGAGAGTTTGTATACAATGAAATAGTATATGTGTAACAGGTTGCTGCTTGGAAAGACAAGGATGGGGATTGGTATGAAACAGG	TTTATATGTAAGAGAGTTTGTATACAATGAAATACTATATGTGTAACAGGTTGCTGCTTGGAAAGACAAGGATGGGGATTAGTATGAAACAGG	93	3	Sub	N/A
1068	TTTATATGTAAGAGAGTTTGTATACAATGAAATAGTATATGTGTAACAGGTTGCTGCTTGGAAAGACAAGGATGGGGATTGGTATGAAACAGG	TTTATATGTAAGAGAGTTTGTATACAATGAAGTAGTATATGTGTAACAGGTTGCTGCTTGGAAAGACAAGGATGGGGATTGGTATGACACAGG	93	3	Sub	N/A
1069	TTTATATGTAAGAGAGTTTGTATACAATGAAATAGTATATGTGTAACAGGTTGCTGCTTGGAAAGACAAGGATGGGGATTGGTATGAAACAGG	TTTATATGTAAGAGAGTTTGTATACGATGAAATAGTATATGTGTAACAGGTTGCTGCTTGGAAAGACAAGGATGGGGATTGGTATGAAACATG	93	3	Sub	N/A
1070	TTTATATGTAAGAGAGTTTGTATACAATGAAATAGTATATGTGTAACAGGTTGCTGCTTGGAAAGACAAGGATGGGGATTGGTATGAAACAGG	TTTATATGTAAGAGAGTTTGTATACAATGAAATAGTATATGTGTAATAGGTTGCTGCTTGTAAAGACAAGGATGGGGATTGGTGTGAAACAGG	93	3	Sub	N/A
1071	TTTATATGTAAGAGAGTTTGTATACAATGAAATAGTATATGTGTAACAGGTTGCTGCTTGGAAAGACAAGGATGGGGATTGGTATGAAACAGG	TTTATATGTAAGAGAGTTTGTATACAATGAAATAGTATATGTGTAACAGGTTGCTGCTTGGAAAGACCAGGATGGGGATTGGTCTGAAACAGG	93	3	Sub	N/A
1072	TTTATATGTAAGAGAGTTTGTATACAATGAAATAGTATATGTGTAACAGGTTGCTGCTTGGAAAGACAAGGATGGGGATTGGTATGAAACAGG	TTTATATGTAAGAGAGTTTGTATACAATGAAATAGTATATGTGTAACAGGTTGCTGCTTGGAAAGAAAAGGATGGGGGTTGGTATGATACAGG	93	3	Sub	N/A
1073	TTTATATGTAAGAGAGTTTGTATACAATGAAATAGTATATGTGTAACAGGTTGCTGCTTGGAAAGACAAGGATGGGGATTGGTATGAAACAGG	TTTATATGTAAGAGAGTTTGTATACAATGAAATAGTATATGTGTAACAGGTTGATGCTTGGAAAGACAAGGATGGGGCTTGGTATGAAACAGG	93	3	Sub	N/A
1074	TTTATATGTAAGAGAGTTTGTATACAATGAAATAGTATATGTGTAACAGGTTGCTGCTTGGAAAGACAAGGATGGGGATTGGTATGAAACAGG	TTTATATGTAAGAGAGTTTGTATACAATGAAATAGTATATGTGTAACAGGTTGCTGCTTGGAAAGACAAGGATGGGGCTTGGTATGAAACAGA	93	3	Sub	N/A
1075	TTTATATGTAAGAGAGTTTGTATACAATGAAATAGTATATGTGTAACAGGTTGCTGCTTGGAAAGACAAGGATGGGGATTGGTATGAAACAGG	TTTATATGTAAGAGAGTTTGTATACAATGAAATAGTATATGTGTAACAAGTTGCTGCTTGGAAAGAC----ATGGGGATTGGTATGAAACAGG	89	3	del	N/A
1076	TTTATATGTAAGAGAGTTTGTATACAATGAAATAGTATATGTGTAACAGGTTGCTGCTTGGAAAGACAAGGATGGGGATTGGTATGAAACAGG	TTTATATGTAAGAGAGTGTGTATACAATGAAATAGTATATGTGTAACAGGTTGCTGCTTGGAAAGACAAGGATGGGGATTAGTATGAAACAGG	93	3	Sub	N/A
1077	TTTATATGTAAGAGAGTTTGTATACAATGAAATAGTATATGTGTAACAGGTTGCTGCTTGGAAAGACAAGGATGGGGATTGGTATGAAACAGG	TTTATATGTAAGAGAGTTTGTATACAATGAAATAGTATATGTGTAACCGGTTGCTGCTTGGAAAGACACGGATGGGGATTAGTATGAAACAGG	93	3	Sub	N/A
1078	TTTATATGTAAGAGAGTTTGTATACAATGAAATAGTATATGTGTAACAGGTTGCTGCTTGGAAAGACAAGGATGGGGATTGGTATGAAACAGG	TTTATATGTAAGAGAGTTTGTATACAATGAAATAGTATATGTGTAACAGGTTGCTGCTTGGAAAGTCAAGGATGGGGATTGGTATGACACAGG	93	3	Sub	N/A
1079	TTTATATGTAAGAGAGTTTGTATACAATGAAATAGTATATGTGTAACAGGTTGCTGCTTGGAAAGACAAGGATGGGGATTGGTATGAAACAGG	TTTATATGTAAGAGAGTTTGTATACAATGAAATAGTATATGTGTAACAGGTTGCTGCTTGGAAAGCCAAGGATGGGGATTGGTATGAAAAAGG	93	3	Sub	N/A
1080	TTTATATGTAAGAGAGTTTGTATACAATGAAATAGTATATGTGTAACAGGTTGCTGCTTGGAAAGACAAGGATGGGGATTGGTATGAAACAGG	TTTATATGTAAGAGAGTTTGTATACAATGAAATAGTATATGTGTAACCGGTTGCTGCTTGGAAAGACTAGGATGGGGATTCGTATGAAACAGG	93	3	Sub	N/A
1081	TTTATATGTAAGAGAGTTTGTATACAATGAAATAGTATATGTGTAACAGGTTGCTGCTTGGAAAGACAAGGATGGGGATTGGTATGAAACAGG	TTTATATGTAAGAGAGTTTGTATACAATGAAATAGTATATGTGTAACCGGTTGCTGCTCGGAAAGACAAGGATGGGGATTGGTATGAAACAGG	93	3	Sub	N/A
1082	TTTATATGTAAGAGAGTTTGTATACAATGAAATAGTATATGTGTAACAGGTTGCTGCTTGGAAAGACAAGGATGGGGATTGGTATGAAACAGG	TTTATATGTAAGAGAGTTTGTATACAATGAAATAGTATATGTGTAATTGATTGCTGCTTGGAAAGACAAGGATGGGGATTGGTATGAAACAGG	93	3	Sub	N/A
1083	TTTATATGTAAGAGAGTTTGTATACAATGAAATAGTATATGTGTAACAGGTTGCTGCTTGGAAAGACAAGGATGGGGATTGGTATGAAACAGG	TTTATATGTAAGAGAGTTTGTATACAATGAAATAGTATATGTGTAACTGTTTGCTGCTTGGAAAGACAAGGATGGGGATTGGTATGAAACAGG	93	3	Sub	N/A
1084	TTTATATGTAAGAGAGTTTGTATACAATGAAATAGTATATGTGTAACAGGTTGCTGCTTGGAAAGACAAGGATGGGGATTGGTATGAAACAGG	TTTATATGTAAGAGAGTTTGTATACAATGAAATAGTATATGTGTAATAGCATGCTGCTTGGAAAGACAAGGATGGGGATTGGTATGAAACAGG	93	3	Sub	N/A
1085	TTTATATGTAAGAGAGTTTGTATACAATGAAATAGTATATGTGTAACAGGTTGCTGCTTGGAAAGACAAGGATGGGGATTGGTATGAAACAGG	TTTATATGTAAGAGAGTTTGTATACAATGAAATAGTATATGTGTAATAGGTTGCTGCTTGGAAAGAC----ATGGGGATTGGCATGAAACAGG	89	3	del	N/A
1086	TTTATATGTAAGAGAGTTTGTATACAATGAAATAGTATATGTGTAACAGGTTGCTGCTTGGAAAGACAAGGATGGGGATTGGTATGAAACAGG	TTTATATGTAAGAGAGTTTGTATACAATGAAATAGTATATGTGTAATAGCATGCTGCTTGGAAAGACAAGGATGGGGATTGGAATGAAACAGG	93	3	Sub	N/A
1087	TTTATATGTAAGAGAGTTTGTATACAATGAAATAGTATATGTGTAACAGGTTGCTGCTTGGAAAGACAAGGATGGGGATTGGTATGAAACAGG	TTTATATGTAAGAGAGTTTGTATACAATGAAATAGTATATGTGTAACAGAGTGCTGCTTGGAAAGACAAGGATGGGGATTGGCATGAAACAGG	93	3	Sub	N/A
1088	TTTATATGTAAGAGAGTTTGTATACAATGAAATAGTATATGTGTAACAGGTTGCTGCTTGGAAAGACAAGGATGGGGATTGGTATGAAACAGG	TTTATATGTAAGAGAGTTTGTATACAATGAAATAGTATATGTGTAACAGAGTGCTGCTTGGAAAGACAAGGATGGGGATTGGGATGAAACAGG	93	3	Sub	N/A
1089	TTTATATGTAAGAGAGTTTGTATACAATGAAATAGTATATGTGTAACAGGTTGCTGCTTGGAAAGACAAGGATGGGGATTGGTATGAAACAGG	TTTATATGTAAGAGAGTTTGTATACAATGAAATAGTATATGTGTAACGGGTTGCTGCTTGGAAAGACAAGGATGGGGATTGGCATGAAACAGG	93	3	Sub	N/A
1090	TTTATATGTAAGAGAGTTTGTATACAATGAAATAGTATATGTGTAACAGGTTGCTGCTTGGAAAGACAAGGATGGGGATTGGTATGAAACAGG	TTTATATGTAAGAGAGTTTGTATACAATGAAATAGTATATGTGTAATAGTGTGCTGCTTGGAAAGACAAGGATGGGGATTGGCATGAAACAGG	93	3	Sub	N/A
1091	TTTATATGTAAGAGAGTTTGTATACAATGAAATAGTATATGTGTAACAGGTTGCTGCTTGGAAAGACAAGGATGGGGATTGGTATGAAACAGG	TTTATATGTAAGAGAGTTTGTATACAATGAAATAGTATATGTGTAAGAGGTTGCTGCTTGGAAAGAC----ATGGGGATTGGCATGAAACAGG	89	3	del	N/A
1092	TTTATATGTAAGAGAGTTTGTATACAATGAAATAGTATATGTGTAACAGGTTGCTGCTTGGAAAGACAAGGATGGGGATTGGTATGAAACAGG	TTTATATGTAAGAGAGTTTGTATACAATGAAATAGTATATGTGTAACAGGTTGCTGCTTGGAAAGAGACGGATGGGGATTCGTATGAAACAGG	93	3	Sub	N/A
1093	TTTATATGTAAGAGAGTTTGTATACAATGAAATAGTATATGTGTAACAGGTTGCTGCTTGGAAAGACAAGGATGGGGATTGGTATGAAACAGG	TTTATATGTAAGAGAGTTTGTATACAATGAAATAGTATATGTGCAACAGGTTGCTGCTTGGAAAGACAAGGATGGGGATTAGTATGAAACAGG	93	3	Sub	N/A
1094	TTTATATGTAAGAGAGTTTGTATACAATGAAATAGTATATGTGTAACAGGTTGCTGCTTGGAAAGACAAGGATGGGGATTGGTATGAAACAGG	TTTATATGTAAGAGAGTTTGTATACAATGAAATAGTATATGTGTAACAGGTTTCTGCTTGGAAAGACAAGGATGGGGATTGGTATGATACAGG	93	3	Sub	N/A
1095	TTTATATGTAAGAGAGTTTGTATACAATGAAATAGTATATGTGTAACAGGTTGCTGCTTGGAAAGACAAGGATGGGGATTGGTATGAAACAGG	TTTATATGTAAGAGAGTTTGTATACAATGAAATAGTATATGTGTAACAGGTTGCTGCTTGGAAAGACCAGGATGGGGCTTGGTATGAAACACG	93	3	Sub	N/A
1096	TTTATATGTAAGAGAGTTTGTATACAATGAAATAGTATATGTGTAACAGGTTGCTGCTTGGAAAGACAAGGATGGGGATTGGTATGAAACAGG	TTTATATGTAAGAGAGGTTGTATACAATGAAATAGTATATGTGTAACAGGTTGCTGCTTGGAAAGACAAGGATGGGGATTGGTATGGAACAGG	93	3	Sub	N/A
1097	TTTATATGTAAGAGAGTTTGTATACAATGAAATAGTATATGTGTAACAGGTTGCTGCTTGGAAAGACAAGGATGGGGATTGGTATGAAACAGG	TTTATATGTAAGAGAGTTTGTATACCATGAAATAGTATATGTGTAACGGGTTGCTGCTTGGAAAGACGAGGATGGGGATTGGTATGAAACAGG	93	3	Sub	N/A
1098	TTTATATGTAAGAGAGTTTGTATACAATGAAATAGTATATGTGTAACAGGTTGCTGCTTGGAAAGACAAGGATGGGGATTGGTATGAAACAGG	TTTATATGTAAGAGAGTTTGTATACAATGAAATAGTATATGTGTAATAGGTTGCTGCTTGGAAAGACGAGGATGGGGATTGGTATGTAACAGG	93	3	Sub	N/A
1099	TTTATATGTAAGAGAGTTTGTATACAATGAAATAGTATATGTGTAACAGGTTGCTGCTTGGAAAGACAAGGATGGGGATTGGTATGAAACAGG	TTTATATGTAAGAGAGTTTGTATACACTGAAATAGTATATGTGTAACAGGTTGCTGCTTGGAAAGACAAGGATGGGGATTCGTATGAAACAGG	93	3	Sub	N/A
1100	TTTATATGTAAGAGAGTTTGTATACAATGAAATAGTATATGTGTAACAGGTTGCTGCTTGGAAAGACAAGGATGGGGATTGGTATGAAACAGG	TTTATATGTAAGAGAGCTTGTATACAATGAAATAGTATATGTGTAACAGGTTGCTGCTTGGAAAGACAAGGATGGGGATTTGTATGAAACAGG	93	3	Sub	N/A
1101	TTTATATGTAAGAGAGTTTGTATACAATGAAATAGTATATGTGTAACAGGTTGCTGCTTGGAAAGACAAGGATGGGGATTGGTATGAAACAGG	TTTATATGTAAGAGAGTTTGTATACAGTGAAATAGTATATGTGTAACAGGTTGCTGCTTGGAAAGACAAGGATGGGGATTCGTATGAAACAGG	93	3	Sub	N/A
1102	TTTATATGTAAGAGAGTTTGTATACAATGAAATAGTATATGTGTAACAGGTTGCTGCTTGGAAAGACAAGGATGGGGATTGGTATGAAACAGG	TTTATATGTAAGAGAGTTTGTATACAATGAAATAGTATATGTGTAACGGGTTGCTGCTTGGAAAGACAAGGATGGGGATTGGTATGAAACAAG	93	3	Sub	N/A
1103	TTTATATGTAAGAGAGTTTGTATACAATGAAATAGTATATGTGTAACAGGTTGCTGCTTGGAAAGACAAGGATGGGGATTGGTATGAAACAGG	TTTATATGTAAGAGAGTTTGTATACAATGAAATAGTATATGTGTAACAGGTTGCTGCTTGGAAAGATAAGGATGGGGATTGGTCTGAAACAGG	93	3	Sub	N/A
1104	TTTATATGTAAGAGAGTTTGTATACAATGAAATAGTATATGTGTAACAGGTTGCTGCTTGGAAAGACAAGGATGGGGATTGGTATGAAACAGG	TTTATATGTAAGAGAGTTTGTATACAATGAAATAGTATATGTGTAATAGGTTGCTGCTTAGAAAGACAAGGATGGGGATTAGTATGAAACAGG	93	3	Sub	N/A
1105	TTTATATGTAAGAGAGTTTGTATACAATGAAATAGTATATGTGTAACAGGTTGCTGCTTGGAAAGACAAGGATGGGGATTGGTATGAAACAGG	TTTATATGTAAGAGAGTTTGTATACAATGAAATAGTATATGTGTAATAGGTTGCTGCTTCTAAAGACAAGGATGGGGATTGGTATGAAACAGG	93	3	Sub	N/A
1106	TTTATATGTAAGAGAGTTTGTATACAATGAAATAGTATATGTGTAACAGGTTGCTGCTTGGAAAGACAAGGATGGGGATTGGTATGAAACAGG	TTTATATGTAAGAGAGTTTGTATACAATGAAATAGTATATGTGTAACAGGTTGCTGCTTTAAAAGACAAGGATGGGGATTGGTATGAAACAGG	93	3	Sub	N/A
1107	TTTATATGTAAGAGAGTTTGTATACAATGAAATAGTATATGTGTAACAGGTTGCTGCTTGGAAAGACAAGGATGGGGATTGGTATGAAACAGG	TTTATATGTAAGAGAGTTTGTATACAATGAAATAGTATATGTGTAATAGGTTGCTGCTTTCAAAGACAAGGATGGGGATTGGTATGAAACAGG	93	3	Sub	N/A
1108	TTTATATGTAAGAGAGTTTGTATACAATGAAATAGTATATGTGTAACAGGTTGCTGCTTGGAAAGACAAGGATGGGGATTGGTATGAAACAGG	TTTATATGTAAGAGAGTTTGTATACAATGAAATAGTATATGTGTAACAGGTTTCTGCTTGGAAAGAGAAGGATGGGGATTGGTATGAAACAGG	93	3	Sub	N/A
1109	TTTATATGTAAGAGAGTTTGTATACAATGAAATAGTATATGTGTAACAGGTTGCTGCTTGGAAAGACAAGGATGGGGATTGGTATGAAACAGG	TTTATATGTAAGAGAGTTTGTATACAATGAAATAGTATATGTGTAACAGGTTGCTGCTTGGAAAGACTAGGATGGGGATTGCTATGAAACAGG	93	3	Sub	N/A
1110	TTTATATGTAAGAGAGTTTGTATACAATGAAATAGTATATGTGTAACAGGTTGCTGCTTGGAAAGACAAGGATGGGGATTGGTATGAAACAGG	TTTATATGTAAGAGAGTTTGTATACAATGAAATAGTATATGTGTAACAGGTTTCTGCTTGGAAAGACAAGGATGGGGATTGGTATGAAACACG	93	3	Sub	N/A
1111	TTTATATGTAAGAGAGTTTGTATACAATGAAATAGTATATGTGTAACAGGTTGCTGCTTGGAAAGACAAGGATGGGGATTGGTATGAAACAGG	TTTATATGTAAGAGAGTTTGTATACAATGAAATAGTATATGTGTAACTGGTTGCTGCTTGGAAAGAAAGGGATGGGGATTGGTATGAAACAGG	93	3	Sub	N/A
1112	TTTATATGTAAGAGAGTTTGTATACAATGAAATAGTATATGTGTAACAGGTTGCTGCTTGGAAAGACAAGGATGGGGATTGGTATGAAACAGG	TTTATATGTAAGAGAGTTTGTATACAATGAAATAGTATATGTGTAACAGGTTGCTGCTTGCAAAGAC----ATGGGGATTGGTATGAAACAGG	89	3	del	N/A
1113	TTTATATGTAAGAGAGTTTGTATACAATGAAATAGTATATGTGTAACAGGTTGCTGCTTGGAAAGACAAGGATGGGGATTGGTATGAAACAGG	TTTATATGTAAGAGAGTTTGTATACAATGAAATAGTATATGTGTAATCGGTTGCTGCTTGGAAATACAAGGATGGGGATTGGTATGAAACAGG	93	3	Sub	N/A
1114	TTTATATGTAAGAGAGTTTGTATACAATGAAATAGTATATGTGTAACAGGTTGCTGCTTGGAAAGACAAGGATGGGGATTGGTATGAAACAGG	TTTATATGTAAGAGAGTTTGTATACAATGAAATAGTATATGTGTAACTGGTTGCTGCTTGGAAAGACGAGGATGGGGCTTTGTATGAAACAGG	93	3	Sub	N/A
1115	TTTATATGTAAGAGAGTTTGTATACAATGAAATAGTATATGTGTAACAGGTTGCTGCTTGGAAAGACAAGGATGGGGATTGGTATGAAACAGG	TTTATATGTAAGAGAGTTTGTATACAATGAAATAGTATATGTGTAACTGGTTGCTGCTTGGAAAGACAAGGATGGGGTTTGGTATGAGACAGG	93	3	Sub	N/A
1116	TTTATATGTAAGAGAGTTTGTATACAATGAAATAGTATATGTGTAACAGGTTGCTGCTTGGAAAGACAAGGATGGGGATTGGTATGAAACAGG	TTTATATGTAAGAGAGTTTGTATACAATGAAATAGTATATGTGTAACTGGTTGTTGCTTGGAAAGACAAGGATGGGGATTGGTATGAAACAGG	93	3	Sub	N/A
1117	TTTATATGTAAGAGAGTTTGTATACAATGAAATAGTATATGTGTAACAGGTTGCTGCTTGGAAAGACAAGGATGGGGATTGGTATGAAACAGG	TTTATATGTAAGAGAGTTTGTATACAATGAAATAGTACATGTGTAACAGGTTGCTGCGTGGAAAGACAAGGATGGGGATTGGTATGAAACAGG	93	3	Sub	N/A
1118	TTTATATGTAAGAGAGTTTGTATACAATGAAATAGTATATGTGTAACAGGTTGCTGCTTGGAAAGACAAGGATGGGGATTGGTATGAAACAGG	TTTATATGTAAGAGAGTTTGTATACAATGAAATAGTATATGTGTAACAGGTTCCTGCTTGGAAAGACGAGGATGGGGATTGGTATGAAACAGG	93	3	Sub	N/A
1119	TTTATATGTAAGAGAGTTTGTATACAATGAAATAGTATATGTGTAACAGGTTGCTGCTTGGAAAGACAAGGATGGGGATTGGTATGAAACAGG	TTTATATGTAAGAGAGTTTGTATACAATGAAATAGTATATGTGTAACAGGTTGTTGCTTGGAAAGACAAGGTTGGGGATTGGTATGAAACAGG	93	3	Sub	N/A
1120	TTTATATGTAAGAGAGTTTGTATACAATGAAATAGTATATGTGTAACAGGTTGCTGCTTGGAAAGACAAGGATGGGGATTGGTATGAAACAGG	TTTATGTGTAAGAGAGTTTGTATACAATGAAATAGTATATGTGTAACAGGTTGATGCTTGGAAAGACAAGGCTGGGGATTGGTATGAAACAGG	93	3	Sub	N/A
1121	TTTATATGTAAGAGAGTTTGTATACAATGAAATAGTATATGTGTAACAGGTTGCTGCTTGGAAAGACAAGGATGGGGATTGGTATGAAACAGG	TTTATATGTAAGAGAGTTTGTATACAATGAAATAGTATATGTGTAACAGGTTGCTGCTTGGAAAGATAAGGATGGGGATTGGTATGAAACAAG	93	3	Sub	N/A
1122	TTTATATGTAAGAGAGTTTGTATACAATGAAATAGTATATGTGTAACAGGTTGCTGCTTGGAAAGACAAGGATGGGGATTGGTATGAAACAGG	TTTATATGTAAGAGAGTTTGTATACAATGAACTAGTATATGTGTAACAGGTTGATGCTTGGAAAGACAAGGATGGGGATTGGTATGAAACAGG	93	3	Sub	N/A
1123	TTTATATGTAAGAGAGTTTGTATACAATGAAATAGTATATGTGTAACAGGTTGCTGCTTGGAAAGACAAGGATGGGGATTGGTATGAAACAGG	TTTATATGTAAGAGAGTTCGTATACAATGAAATAGTATATGTGTAACAGGTTGCTGCTTGGAAAGACAAGGATGGGGATTAGTATGAAACAGG	93	3	Sub	N/A
1124	TTTATATGTAAGAGAGTTTGTATACAATGAAATAGTATATGTGTAACAGGTTGCTGCTTGGAAAGACAAGGATGGGGATTGGTATGAAACAGG	TTTATATGTAAGAGAGTTTGTATACCATGAAATAGTATATGTGTAACAGGTTGCTGCTTGGAAAGACGAGGATGGGGATTGGTATGAAACAGG	93	3	Sub	N/A
1125	TTTATATGTAAGAGAGTTTGTATACAATGAAATAGTATATGTGTAACAGGTTGCTGCTTGGAAAGACAAGGATGGGGATTGGTATGAAACAGG	TTTATATGTAAGAGAGTTTGTATACAATGAAATAGTATATGTGTAACAGGTTGCTGCTTGGAAAGAGCAGGATGGGGATTCGTATGAAACAGG	93	3	Sub	N/A
1126	TTTATATGTAAGAGAGTTTGTATACAATGAAATAGTATATGTGTAACAGGTTGCTGCTTGGAAAGACAAGGATGGGGATTGGTATGAAACAGG	TTTATATGTAAGAGAGTTTGTATACAATGAAATAGTATATGTGTAACAGGTTGCTGC-TGGAAAGACAAGGATGGGGATTGGTATGAAACAGG	92	3	del	N/A
1127	TTTATATGTAAGAGAGTTTGTATACAATGAAATAGTATATGTGTAACAGGTTGCTGCTTGGAAAGACAAGGATGGGGATTGGTATGAAACAGG	TTTATATGTAAGAGAGTTTGTATACAATGAAATAGTATATGTGTAACAGGTTGCTGCTTGGAAAGAGGAGGATGGGGATTCGTATGAAACAGG	93	3	Sub	N/A
1128	TTTATATGTAAGAGAGTTTGTATACAATGAAATAGTATATGTGTAACAGGTTGCTGCTTGGAAAGACAAGGATGGGGATTGGTATGAAACAGG	TTTATATGTAAGAGAGTTTGTATACAATGAAATAGTATATGTGTAACCGGTTCCTGCTTGGAAAGACAAGGATGGGGATTCGTATGAAACAGG	93	3	Sub	N/A
1129	TTTATATGTAAGAGAGTTTGTATACAATGAAATAGTATATGTGTAACAGGTTGCTGCTTGGAAAGACAAGGATGGGGATTGGTATGAAACAGG	TTTATATGTAAGAGAGTTTGTATACAATGAAATAGTATATGTGTAACTGGTTGCTGCTTGGAAAGACAAGGATGGGGATTGGTATGCAACAGG	93	3	Sub	N/A
1130	TTTATATGTAAGAGAGTTTGTATACAATGAAATAGTATATGTGTAACAGGTTGCTGCTTGGAAAGACAAGGATGGGGATTGGTATGAAACAGG	TTTATATGTAAGAGAGTTTGTATACAATGAAATAGTATATGTGTAACAGGTTGCTGCTTGGAAAGATAAGGATGGGGGTTGGTATGAAACACG	93	3	Sub	N/A
1131	TTTATATGTAAGAGAGTTTGTATACAATGAAATAGTATATGTGTAACAGGTTGCTGCTTGGAAAGACAAGGATGGGGATTGGTATGAAACAGG	TTTATATGTAAGAGAGTTTGTATACAATGAAATAGTATATGTGTAATAGGTGGCTGCTGGGAAAGACAAGGATGGGGATTGGTATGAAACAGG	93	3	Sub	N/A
1132	TTTATATGTAAGAGAGTTTGTATACAATGAAATAGTATATGTGTAACAGGTTGCTGCTTGGAAAGACAAGGATGGGGATTGGTATGAAACAGG	TTTATATGTAAGAGAGTTTGTATACAATGAAATAGTATATGTGTAATAGGTTNCTGCTTGNAAAGANAAGGATGGGGATTGGTATGAAACAGG	93	3	Sub	N/A
1133	TTTATATGTAAGAGAGTTTGTATACAATGAAATAGTATATGTGTAACAGGTTGCTGCTTGGAAAGACAAGGATGGGGATTGGTATGAAACAGG	TTTATATGAAAGAGAGTTTGTATACAATGAAACAGTGTATGTGTAACAGGTTGCTGCTTGGAAAGAC----ATGGGGATTGGTATGAAACAGG	89	3	del	N/A
1134	TTTATATGTAAGAGAGTTTGTATACAATGAAATAGTATATGTGTAACAGGTTGCTGCTTGGAAAGACAAGGATGGGGATTGGTATGAAACAGG	TTTATATGTAAGAGAGTTTGTATACAATGAAATAGTATATGTGTAACAGGTTGCTGCTTGGAAAGAAGAGGATGGGGATTGGTATGAAACAGC	93	2	Sub	N/A
1135	TTTATATGTAAGAGAGTTTGTATACAATGAAATAGTATATGTGTAACAGGTTGCTGCTTGGAAAGACAAGGATGGGGATTGGTATGAAACAGG	TTTATATGTAAGAGAGTTTGTATACAATGAAATAGTATATGTGTAACAGGTTGCTGCTTGGAAAGACTAGGATGGGGATTGGTATGCAACAGG	93	2	Sub	N/A
1136	TTTATATGTAAGAGAGTTTGTATACAATGAAATAGTATATGTGTAACAGGTTGCTGCTTGGAAAGACAAGGATGGGGATTGGTATGAAACAGG	TTTATATGTAAGAGAGTTTGTATACAATGAAATAGTATATGTGTAACAGGTTGCTGCTTGGAAAGAGAAGGATGGGGGTTGGTATGAAACAGC	93	2	Sub	N/A
1137	TTTATATGTAAGAGAGTTTGTATACAATGAAATAGTATATGTGTAACAGGTTGCTGCTTGGAAAGACAAGGATGGGGATTGGTATGAAACAGG	TTTATATGTAAGAGAGTTTGTATACAATGAAATAGTATATGTGTAACAGGTTGCTGCTTGGAAAGATAAGGATGGGGATTGGTATGAAACAGT	93	2	Sub	N/A
1138	TTTATATGTAAGAGAGTTTGTATACAATGAAATAGTATATGTGTAACAGGTTGCTGCTTGGAAAGACAAGGATGGGGATTGGTATGAAACAGG	TTTATATGTAAGAGAGTTTGTATACAATGAAATAGTATATGTGTAACAGGTTGCTGCTTGGAAAGAAAGGGATGGGGATTCGTATGAAACAGG	93	2	Sub	N/A
1139	TTTATATGTAAGAGAGTTTGTATACAATGAAATAGTATATGTGTAACAGGTTGCTGCTTGGAAAGACAAGGATGGGGATTGGTATGAAACAGG	TTTATATGTAAGAGAGTTTGTATACAATGAAATAGTATATGTGTAACAGGTTGCTGCTTGGAAAGACTAGGATGGGGATTGGTATGAAAAAGG	93	2	Sub	N/A
1140	TTTATATGTAAGAGAGTTTGTATACAATGAAATAGTATATGTGTAACAGGTTGCTGCTTGGAAAGACAAGGATGGGGATTGGTATGAAACAGG	TTTATATGTAAGAGAGTTTGTATACAATGAAATAGTATATGTGTAACAGGTTGCTGCTTGGAAAGAATAGGATGGGGATTGGTATGAAACAGT	93	2	Sub	N/A
1141	TTTATATGTAAGAGAGTTTGTATACAATGAAATAGTATATGTGTAACAGGTTGCTGCTTGGAAAGACAAGGATGGGGATTGGTATGAAACAGG	TTTATATGTAAGAGAGTTTGTATATAATGGAATAGTGTATGTGTAACGGGTTGCTGCTTGGAAAGACAAGGATGGGGATTGGTATGAAAAAGG	93	2	Sub	N/A
1142	TTTATATGTAAGAGAGTTTGTATACAATGAAATAGTATATGTGTAACAGGTTGCTGCTTGGAAAGACAAGGATGGGGATTGGTATGAAACAGG	TTTATATGTAAGAGAGTTTGTATACAATGAAATAGTATATGTGTAACAGGTTGCTGCTTGGAAAGACGAGGATGGGCATTGGTATGAAACAGG	93	2	Sub	N/A
1143	TTTATATGTAAGAGAGTTTGTATACAATGAAATAGTATATGTGTAACAGGTTGCTGCTTGGAAAGACAAGGATGGGGATTGGTATGAAACAGG	TTTATATGTAAGAGAGTTTGTATACCATGAAATAGTATATGTGTAACAGGTTGCTGCTTGGAAAGAAAAGGATGGGGATTGGTATGAAACAGC	93	2	Sub	N/A
1144	TTTATATGTAAGAGAGTTTGTATACAATGAAATAGTATATGTGTAACAGGTTGCTGCTTGGAAAGACAAGGATGGGGATTGGTATGAAACAGG	TTTATATGTAAGAGAGTTTGTATACAATGAAATAGTATATGTGTAACAGGTTGCTGGTTGGAAAGACAAGGATGGGGGTTGGTATGAAACAGG	93	2	Sub	N/A
1145	TTTATATGTAAGAGAGTTTGTATACAATGAAATAGTATATGTGTAACAGGTTGCTGCTTGGAAAGACAAGGATGGGGATTGGTATGAAACAGG	TTTATATGTAAGAGAGTTTGTATACAATGAAATAGTATATGTGTAACAGGTTGCTGCTTGGAAAGAGAAGGATGGGGATTGGTATGGAACAGG	93	2	Sub	N/A
1146	TTTATATGTAAGAGAGTTTGTATACAATGAAATAGTATATGTGTAACAGGTTGCTGCTTGGAAAGACAAGGATGGGGATTGGTATGAAACAGG	TTTATATGTAAGAGAGTTTGTATACAATGAAATAGTATATGTGTAACAGGTTGCTGCTTGAAAAGACTAGGATGGGGATTGGTATGAAACAGG	93	2	Sub	N/A
1147	TTTATATGTAAGAGAGTTTGTATACAATGAAATAGTATATGTGTAACAGGTTGCTGCTTGGAAAGACAAGGATGGGGATTGGTATGAAACAGG	TTTATATGTAAGAGAGTTTGTATACAATGAAATAGTATATGTGTAATCGGTTGCTGCTTGGAAAGACAGGGATGGGGATTGGTATGAAACAGG	93	2	Sub	N/A
1148	TTTATATGTAAGAGAGTTTGTATACAATGAAATAGTATATGTGTAACAGGTTGCTGCTTGGAAAGACAAGGATGGGGATTGGTATGAAACAGG	TTTATATGTAAGAGAGTTTGTATACAATGAAATAGTATATGTGTAATAGGGTGATGCTTGGAAAGACAAGGATGGGGATTGGTATGAAACAGG	93	2	Sub	N/A
1149	TTTATATGTAAGAGAGTTTGTATACAATGAAATAGTATATGTGTAACAGGTTGCTGCTTGGAAAGACAAGGATGGGGATTGGTATGAAACAGG	TTTATATGTAAGAGAGTTTGTATACAATGAAATAGTATATGTGTAACGGGTTGCTGCTTGGAAAGAGAAGGATGGGGGTTGGTATGGAACAGG	93	2	Sub	N/A
1150	TTTATATGTAAGAGAGTTTGTATACAATGAAATAGTATATGTGTAACAGGTTGCTGCTTGGAAAGACAAGGATGGGGATTGGTATGAAACAGG	TTTATATGTAAGAGAGTTTGTATACAATGAAATAGTATATGTGTAACAGGTTCCTGCTTGGAAAGACAAGGATGGGGATTGGTATGCAACAGG	93	2	Sub	N/A
1151	TTTATATGTAAGAGAGTTTGTATACAATGAAATAGTATATGTGTAACAGGTTGCTGCTTGGAAAGACAAGGATGGGGATTGGTATGAAACAGG	TTTATATGTAAGAGAGTTTGTATACAATGAAATAGTATATGTGTAACAGGTTGCTGCTGGGAAAGACGAGGATGGGGATTGGTATGAAACAGG	93	2	Sub	N/A
1152	TTTATATGTAAGAGAGTTTGTATACAATGAAATAGTATATGTGTAACAGGTTGCTGCTTGGAAAGACAAGGATGGGGATTGGTATGAAACAGG	TTTATATGTAAGAGAGTTTGTATACAATGAAATAGTATATGTGTAATAGGTTGCTGCTTGGAAAGAGGAGGATGGGGATTGGTATGAAACAGG	93	2	Sub	N/A
1153	TTTATATGTAAGAGAGTTTGTATACAATGAAATAGTATATGTGTAACAGGTTGCTGCTTGGAAAGACAAGGATGGGGATTGGTATGAAACAGG	TTTATATGTAAGAGAGTTTGTATACAATGAAATAGTATATGTGTAACAGGTTGCTGCTTGGAAAGATTTGGATGGGGATTGGTATGAAACACG	93	2	Sub	N/A
1154	TTTATATGTAAGAGAGTTTGTATACAATGAAATAGTATATGTGTAACAGGTTGCTGCTTGGAAAGACAAGGATGGGGATTGGTATGAAACAGG	TTTATATGTAAGAGAGTTTGTATACAATGAAATAGTATATGTGTAACAGGTTGCTGCTTGGAAAGACAACGAGGGGGATTGGTATGAAACAGG	93	2	Sub	N/A
1155	TTTATATGTAAGAGAGTTTGTATACAATGAAATAGTATATGTGTAACAGGTTGCTGCTTGGAAAGACAAGGATGGGGATTGGTATGAAACAGG	TTTATATGTAAGAGAGTTTGTATACAATGAAATAGTATATGTGTAACAGGTTGCGGCTTGGAAAGACAAGGATGGGGATTGGTATGTAACAGG	93	2	Sub	N/A
1156	TTTATATGTAAGAGAGTTTGTATACAATGAAATAGTATATGTGTAACAGGTTGCTGCTTGGAAAGACAAGGATGGGGATTGGTATGAAACAGG	TGTATATGTAAGAGAGTTTGTATACACTGAAATAGTATATGTGTAACAGGTTGCTGCTTGGAAAGACAAGGATGGGGATTGGTATGAAACAGG	93	2	Sub	N/A
1157	TTTATATGTAAGAGAGTTTGTATACAATGAAATAGTATATGTGTAACAGGTTGCTGCTTGGAAAGACAAGGATGGGGATTGGTATGAAACAGG	TTTATATGTAAGAGAGTTTGTATATAATGAAACAGTGTATGTGTAACAGGTTGCTGCTTGGAAGGAC----ATGGGGATTGGTATGAAACAGG	89	2	del	N/A
1158	TTTATATGTAAGAGAGTTTGTATACAATGAAATAGTATATGTGTAACAGGTTGCTGCTTGGAAAGACAAGGATGGGGATTGGTATGAAACAGG	TTTATATGTAAGAGAGTTTGTATACAATGAAATAGTATATGTGTAACAGGTTGCTGCTGGGAAAGAC----ATGGGGATTAGTATGAAACAGG	89	2	del	N/A
1159	TTTATATGTAAGAGAGTTTGTATACAATGAAATAGTATATGTGTAACAGGTTGCTGCTTGGAAAGACAAGGATGGGGATTGGTATGAAACAGG	TTTATATGTAAGAGAGTTTGTATACAATGAAATAGTATATGTGTACCAGGTTGCTGCTTGGAAAGACGAGGATGGGGATTGGTATGAAACAGG	93	2	Sub	N/A
1160	TTTATATGTAAGAGAGTTTGTATACAATGAAATAGTATATGTGTAACAGGTTGCTGCTTGGAAAGACAAGGATGGGGATTGGTATGAAACAGG	TTTATATGTAAGAGAGTTTGTATACAATGAAATAGTATATGTGTAACAGGTTGCTGCTTGGAAAGAGACGGATGGGGCTTGGTATGAAACAGG	93	2	Sub	N/A
1161	TTTATATGTAAGAGAGTTTGTATACAATGAAATAGTATATGTGTAACAGGTTGCTGCTTGGAAAGACAAGGATGGGGATTGGTATGAAACAGG	TTTATATGTAAGAGAGTTTGTATACAATGAAATAGTATATGTGGAACAGGTTGCTGCTTGGAAAGACAAGGATGGGGATGGGTATGAAACAGG	93	2	Sub	N/A
1162	TTTATATGTAAGAGAGTTTGTATACAATGAAATAGTATATGTGTAACAGGTTGCTGCTTGGAAAGACAAGGATGGGGATTGGTATGAAACAGG	TTTATATGTAAGAGAGTTTGTATACAATGAAATAGTATATGTGTAACCGGTTGCTGCTTGGAAAGAACAGGATGGGGATTGGTATGAAACAGG	93	2	Sub	N/A
1163	TTTATATGTAAGAGAGTTTGTATACAATGAAATAGTATATGTGTAACAGGTTGCTGCTTGGAAAGACAAGGATGGGGATTGGTATGAAACAGG	TTTATATGTAAGAGAGTTTGTATACAATGAAATAGTATATGTGTAACCGGTTGATGCTTGGAAAGAAAAGGATGGGGATTGGTATGAAACAGG	93	2	Sub	N/A
1164	TTTATATGTAAGAGAGTTTGTATACAATGAAATAGTATATGTGTAACAGGTTGCTGCTTGGAAAGACAAGGATGGGGATTGGTATGAAACAGG	TTTATATGTAAGAGAGTTTGTATACAATGAAATAGTATATGTGTAACTGGTTGCTGCTTGGAAAGATTAGGATGGGGGTTGGTATGAGACAGG	93	2	Sub	N/A
1165	TTTATATGTAAGAGAGTTTGTATACAATGAAATAGTATATGTGTAACAGGTTGCTGCTTGGAAAGACAAGGATGGGGATTGGTATGAAACAGG	TTTATATGTAAGAGAGTTTGTATACAATGAAATAGTATATGTGTAATAGGTTGCTGCTTGGAAAGAAAAGGATGGGGATTGGGATGAAACAGG	93	2	Sub	N/A
1166	TTTATATGTAAGAGAGTTTGTATACAATGAAATAGTATATGTGTAACAGGTTGCTGCTTGGAAAGACAAGGATGGGGATTGGTATGAAACAGG	TTTATATGTAAGAGAGTTTGTATACAATGAAATAGTATATGTGTAATAGGTTGCTGCTTGGAAAGACTAGGATGGGGATTGGTATGAAACATG	93	2	Sub	N/A
1167	TTTATATGTAAGAGAGTTTGTATACAATGAAATAGTATATGTGTAACAGGTTGCTGCTTGGAAAGACAAGGATGGGGATTGGTATGAAACAGG	TTTATATGTAAGAGAGTTTGTATACAATGAAATAGTATATGTGTAATAGGTTGCTGTTTGGAAAGACGAGGATGGGGATTTGTATGAAACAGG	93	2	Sub	N/A
1168	TTTATATGTAAGAGAGTTTGTATACAATGAAATAGTATATGTGTAACAGGTTGCTGCTTGGAAAGACAAGGATGGGGATTGGTATGAAACAGG	TTTATATGTAAGAGAGGTTGTATACAATGAAATAGTATATGTGTAACAGGTTGCTGCGTGGAAAGACAAGGATGGGGATTGGTATGAAACAGG	93	2	Sub	N/A
1169	TTTATATGTAAGAGAGTTTGTATACAATGAAATAGTATATGTGTAACAGGTTGCTGCTTGGAAAGACAAGGATGGGGATTGGTATGAAACAGG	TTTATATGTAAGAGAGTTTGTATACAATGAAATAGTATATGTGTAATCGGTTGCTGCTTGGAAAGACAAGGATGGGGATTTGTATGAAACAGG	93	2	Sub	N/A
1170	TTTATATGTAAGAGAGTTTGTATACAATGAAATAGTATATGTGTAACAGGTTGCTGCTTGGAAAGACAAGGATGGGGATTGGTATGAAACAGG	TTTATATGTAAGAGAGTTTGTATACAATGAAATAGTATATGTGTAACTGGTTGCTGCTTGGAAAGAGAAGGATGGGGATTGGTATGACACAGG	93	2	Sub	N/A
1171	TTTATATGTAAGAGAGTTTGTATACAATGAAATAGTATATGTGTAACAGGTTGCTGCTTGGAAAGACAAGGATGGGGATTGGTATGAAACAGG	TTTATATGTAAGAGAGTTTGTATACAATGAAATAGTATATGTGTAACTGGTTGCTGCTTGGAAAGACAACGATGGGGATTGGTATGAAACAGG	93	2	Sub	N/A
1172	TTTATATGTAAGAGAGTTTGTATACAATGAAATAGTATATGTGTAACAGGTTGCTGCTTGGAAAGACAAGGATGGGGATTGGTATGAAACAGG	TTTATATGTAAGAGAGTTTGTATACAATGAAATAGTATATGTGTAACTGGTTGCTGCATGGAAAGATTTGGATGGGGATTGGTATGAAACAGG	93	2	Sub	N/A
1173	TTTATATGTAAGAGAGTTTGTATACAATGAAATAGTATATGTGTAACAGGTTGCTGCTTGGAAAGACAAGGATGGGGATTGGTATGAAACAGG	TTTATATGTAAGAGAGTGTGTATACAATGAAATAGTATATGTGTAACAGGTTGCTGCTTGGAAAGACAAGGACGGGGATTGGTATGAAACAGG	93	2	Sub	N/A
1174	TTTATATGTAAGAGAGTTTGTATACAATGAAATAGTATATGTGTAACAGGTTGCTGCTTGGAAAGACAAGGATGGGGATTGGTATGAAACAGG	TTTATATGTAAGAGAGTTTGTATACAATTAAATAGTATATGTGTAACAGGTTGCTGCTTGGAAAGAC----ATGGGGATTGGTATGAAACAGG	89	2	del	N/A
1175	TTTATATGTAAGAGAGTTTGTATACAATGAAATAGTATATGTGTAACAGGTTGCTGCTTGGAAAGACAAGGATGGGGATTGGTATGAAACAGG	TTTATATGTAAGAGAGTTTGTATACAATGAAATAGTATATGTGTAACAGGGTGCTGCTTGGAAAGAGAAGGATGGGGATTGGTATGAAACAGG	93	2	Sub	N/A
1176	TTTATATGTAAGAGAGTTTGTATACAATGAAATAGTATATGTGTAACAGGTTGCTGCTTGGAAAGACAAGGATGGGGATTGGTATGAAACAGG	TTTATATGTAAGAGAGTTTGTATACAATGAAATAGTATATGTGTAACAGGTTTCTGCTTGGAAAGACAAGGATGGGGATTGGGATGAAACAGG	93	2	Sub	N/A
1177	TTTATATGTAAGAGAGTTTGTATACAATGAAATAGTATATGTGTAACAGGTTGCTGCTTGGAAAGACAAGGATGGGGATTGGTATGAAACAGG	TTTATATGTAAGAGAGTTTGTATACAATGAAATAGTATATGTGTAACAGGTTGCTGCTTGGAAAGACATGGATGGGGATTGGGATGAAACAGG	93	2	Sub	N/A
1178	TTTATATGTAAGAGAGTTTGTATACAATGAAATAGTATATGTGTAACAGGTTGCTGCTTGGAAAGACAAGGATGGGGATTGGTATGAAACAGG	TTTATATGTAAGAGAGTTTGTATACAATGAAATAGTATATGTGTAACAGGTTGATGCTTGGAAAGACAAGGATGGGGAGTGGTATGAAACAGG	93	2	Sub	N/A
1179	TTTATATGTAAGAGAGTTTGTATACAATGAAATAGTATATGTGTAACAGGTTGCTGCTTGGAAAGACAAGGATGGGGATTGGTATGAAACAGG	TTTATATGTAAGAGAGTTTGTATACAATGAAA-AGTGTATGTGTAACGGGTTGCTGCTTGGAAAGACAAGGATGGGGATTGGTATGAAACAGG	92	2	del	N/A
1180	TTTATATGTAAGAGAGTTTGTATACAATGAAATAGTATATGTGTAACAGGTTGCTGCTTGGAAAGACAAGGATGGGGATTGGTATGAAACAGG	TTTATATGTAAGAGAGTTTGTATACAATGAAATAGTATATGTGTAACAGGTTGATGCTTGGAAAGACAAGGAGGGGGATTGGTATGAAACAGG	93	2	Sub	N/A
1181	TTTATATGTAAGAGAGTTTGTATACAATGAAATAGTATATGTGTAACAGGTTGCTGCTTGGAAAGACAAGGATGGGGATTGGTATGAAACAGG	TTTATATGTAAGAGAGTTTGTATACAATGAAATAGTATATGTGTAACAGGTTGCTGCTTGGACAGACAAGGATGGGGATGGGTATGAAACAGG	93	2	Sub	N/A
1182	TTTATATGTAAGAGAGTTTGTATACAATGAAATAGTATATGTGTAACAGGTTGCTGCTTGGAAAGACAAGGATGGGGATTGGTATGAAACAGG	TTTATATGTAAGGGAGTTTGTATACAATGAAATAGTGTATGTGTAACAGGTTGCTGCTTGGAAAGAC----ATGGGGATTGGTATGAAACAGG	89	2	del	N/A
1183	TTTATATGTAAGAGAGTTTGTATACAATGAAATAGTATATGTGTAACAGGTTGCTGCTTGGAAAGACAAGGATGGGGATTGGTATGAAACAGG	TTTATATGTAAGAGAGTATGTATACAATGAAATAGTATATGTGTAATAGGTTGCTGCTTGGAAAGACAAGGATGGGGATTGGTATGAAACAGG	93	2	Sub	N/A
1184	TTTATATGTAAGAGAGTTTGTATACAATGAAATAGTATATGTGTAACAGGTTGCTGCTTGGAAAGACAAGGATGGGGATTGGTATGAAACAGG	TTTATATGTAAGAGAGTTTGTATACAATGAAATAGTATATGTGTAACAGGTTGCTGCTTGGAAAGACAATGATTGGGATTGGTATGAAACAGG	93	2	Sub	N/A
1185	TTTATATGTAAGAGAGTTTGTATACAATGAAATAGTATATGTGTAACAGGTTGCTGCTTGGAAAGACAAGGATGGGGATTGGTATGAAACAGG	TTTATATGTAAGAGAGTTTGTATACAATGAAATAGTATATGTGTAACAGGTTGCTGCTTGGAAAGACGATGATGGGGATTGGTATGAAACAGG	93	2	Sub	N/A
1186	TTTATATGTAAGAGAGTTTGTATACAATGAAATAGTATATGTGTAACAGGTTGCTGCTTGGAAAGACAAGGAT------------------GGGGATTGGTATGAAACAGG	TTTATATGTAAGAGAGTTTGTATACAATGAAATAGTATATGTGTAACAGGTTGCTGCTTGGAAAGACAAGGATGGGGATTTGTATGAAACAGGGGATTGGTATGAAACAGG	111	2	Ins	N/A
1187	TTTATATGTAAGAGAGTTTGTATACAATGAAATAGTATATGTGTAACAGGTTGCTGCTTGGAAAGACAAGGATGGGGATTGGTATGAAACAGG	TTTATATGTAAGAGAGTTTGTATACAATGAAATAGTATATGTGTAACTGGTTGCTGCTTGGAAAGACTAGGATGGGGATTGGTATGACACAGG	93	2	Sub	N/A
1188	TTTATATGTAAGAGAGTTTGTATACAATGAAATAGTATATGTGTAACAGGTTGCTGCTTGGAAAGACAAGGATGGGGATTGGTATGAAACAGG	TTTATATGTAAGAGAGTTTGTATACAATGAAATAGTATATGTGTAACAGGTTGGTGCTTGGAAAGACAAGGATGGAGATTGGTATGAAACAGG	93	2	Sub	N/A
1189	TTTATATGTAAGAGAGTTTGTATACAATGAAATAGTATATGTGTAACAGGTTGCTGCTTGGAAAGACAAGGATGGGGATTGGTATGAAACAGG	TTTATATGTAAGAGAGTTTGTATATAATGGATTAGTGTATGTGTAACGGGTTGCTGCTTGGAAAGACAAGGATGGGGATTGGTATGAAACAGG	93	2	Sub	N/A
1190	TTTATATGTAAGAGAGTTTGTATACAATGAAATAGTATATGTGTAACAGGTTGCTGCTTGGAAAGACAAGGATGGGGATTGGTATGAAACAGG	TTTATATGTAAGAGAGTTTGTATACTATGAAATAGTATATGTGTAACAGGTTGCTGCTTGGAAAGACAAGGATGGGGATTGATATGAAACAGG	93	2	Sub	N/A
1191	TTTATATGTAAGAGAGTTTGTATACAATGAAATAGTATATGTGTAACAGGTTGCTGCTTGGAAAGACAAGGATGGGGATTGGTATGAAACAGG	TTTATATGTAAGAGAGTTTGTATACAATGAAATAGTATATGTGTAACAGGTTGCTGCTTGGACAGACACGGATGGGGATTGGTATGAAACAGG	93	2	Sub	N/A
1192	TTTATATGTAAGAGAGTTTGTATACAATGAAATAGTATATGTGTAACAGGTTGCTGCTTGGAAAGACAAGGATGGGGATTGGTATGAAACAGG	TTTATATGTAAGAGAGTTTGTATACAATGAAATAGTATATGTGTAACAGGTTGCTGCTTGGAAAGATATGGATGGGGATTCGTATGAAACAGG	93	2	Sub	N/A
1193	TTTATATGTAAGAGAGTTTGTATACAATGAAATAGTATATGTGTAACAGGTTGCTGCTTGGAAAGACAAGGATGGGGATTGGTATGAAACAGG	TTTATATGTAAGAGTGTTTGTATACAATGAAATAGTATATGTGTAACAGGTTGCTGCTTGGAATGACAAGGATGGGGATTGGTATGAAACAGG	93	2	Sub	N/A
1194	#NAME?	TTTATATGTAAGAGAGTATAATTCATAATATATTTTTATATTCGATCATAAATTAGTTTATATGTAAGAGAGTTTGTATACAATGAAATAGTATATGTGTAACAGGTTGCTGCTTGGAAAGACAAGGATGGGGATTGGTATGAAACAGG	149	2	Ins	N/A
1195	TTTATATGTAAGAGAGTTTGTATACAATGAAATAGTATATGTGTAACAGGTTGCTGCTTGGAAAGACAAGGATGGGGATTGGTATGAAACAGG	TTTATATGTAAGAGAGTTTGTATACAATGAAATAGTATATGTGTAATAGGTTGCTGCTTGGAAAGATAAGGATGGGGTTTGGTATGAAACAGG	93	2	Sub	N/A
1196	TTTATATGTAAGAGAGTTTGTATACAATGAAATAGTATATGTGTAACAGGTTGCTGCTTGGAAAGACAAGGATGGGGATTGGTATGAAACAGG	TTTATATGTAAGAGAGTTTGTATATAATGAAACAGTGTATGTGTAACAGGTTGCTGCTTGGACATACAAGGATGGGGATTGGTATGAAACAGG	93	2	Sub	N/A
1197	TTTATATGTAAGAGAGTTTGTATACAATGAAATAGTATATGTGTAACAGGTTGCTGCTTGGAAAGACAAGGATGGGGATTGGTATGAAACAGG	TTTATATGTAAGAGAGTTTGTATACAATGAAATAGTATATGTGTAACAGGTTGCTGCTTGGAAAGACAAGGATGTGGATTTGTATGAAACAGG	93	2	Sub	N/A
1198	TTTATATGTAAGAGAGTTTGTATACAATGAAATAGTATATGTGTAACAGGTTGCTGCTTGGAAAGACAAGGATGGGGATTGGTATGAAACAGG	TTTATATGTAAGAGAGTTTGTATACAATGAAATAGTATATGTGTAACAGGTTTCTGCTTGGAAAGACAATGATGGGGATTCGTATGAAACAGG	93	2	Sub	N/A
1199	TTTATATGTAAGAGAGTTTGTATACAATGAAATAGTATATGTGTAACAGGTTGCTGCTTGGAAAGACAAGGATGGGGATTGGTATGAAACAGG	TTTATATGTAAGAGAGTTTGTATACAATGAAATAGTATATGTGTAATAGGTTTCTGCTTGGAAAGACATGGATGGGGATTGGTATGAAACAGG	93	2	Sub	N/A
1200	TTTATATGTAAGAGAGTTTGTATACAATGAAATAGTATATGTGTAACAGGTTGCTGCTTGGAAAGACAAGGATGGGGATTGGTATGAAACAGG	TTTATATGTAAGAGAGTTTGTATACAATGAAATAGTATATGTGTAACAGGTTGGTGCTTGGAAAGACAAGTATGGGGATTGGTATGAAACAGG	93	2	Sub	N/A
1201	TTTATATGTAAGAGAGTTTGTATACAATGAAATAGTATATGTGTAACAGGTTGCTGCTTGGAAAGACAAGGATGGGGATTGGTATGAAACAGG	TTTATATGTAAGAGAGTTTGTATACAATGAAATAGTATATGTGTAACAGGTTGCTGCTTGGAAAGATAGGGATGGGGATTGGTATGAAACAGG	93	2	Sub	N/A
1202	TTTATATGTAAGAGAGTTTGTATACAATGAAATAGTATATGTGTAACAGGTTGCTGCTTGGAAAGACAAGGATGGGGATTGGTATGAAACAGG	TTTATATGTAAGAGAGTTTGTATACAATGAAATAGTATATGAGTAATAGGTTGCTGCTTGGAAAGACAAGGATGGGGATTGGTATGAAACAGG	93	2	Sub	N/A
1203	TTTATATGTAAGAGAGTTTGTATACAATGAAATAGTATATGTGTAACAGGTTGCTGCTTGGAAAGACAAGGATGGGGATTGGTATGAAACAGG	TTTATATGTAAGAGAGTTTGTATACAATGAAATAGTATATGGGTAATAGGTTGCTGCTGGGAAAGACAAGGATGGGGATTGGTATGAAACAGG	93	2	Sub	N/A
1204	TTTATATGTAAGAGAGTTTGTATACAATGAAATAGTATATGTGTAACAGGTTGCTGCTTGGAAAGACAAGGATGGGGATTGGTATGAAACAGG	TTTATATGTAAGAGAGTTTGTATAAAATGAAACAGTGTATGTGTAACGGGTTGCTGCTTGGAAAGACAAGGATGGGGATTGGTATGAAACAGG	93	2	Sub	N/A
1205	TTTATATGTAAGAGAGTTTGTATACAATGAAATAGTATATGTGTAACAGGTTGCTGCTTGGAAAGACAAGGATGGGGATTGGTATGAAACAGG	TTTATATGTAAGAGAGTTTGTATACAATGAAATAGTATATGTGTAACAGGTTGCGGCTTGGAAAGACAGGGATGGGGATTGGTATGAAACAGG	93	2	Sub	N/A
1206	TTTATATGTAAGAGAGTTTGTATACAATGAAATAGTATATGTGTAACAGGTTGCTGCTTGGAAAGACAAGGATGGGGATTGGTATGAAACAGG	TTTATATGTAAGAGAGTTTGTATACAATGAAATAGTATATGTGTAACAGGTTGCGGCTTGGAAAGAAAGGGATGGGGATTAGTATGAAACAGG	93	2	Sub	N/A
1207	TTTATATGTAAGAGAGTTTGTATACAATGAAATAGTATATGTGTAACAGGTTGCTGCTTGGAAAGACAAGGATGGGGATTGGTATGAAACAGG	TTTATATGTAAGAGAGTTTGTATACAATGAAATAGTATATGTGTAATAGGTTGCGGCTTGGAAAGACAAGGATGGGGATTGGTATGAAACAAG	93	2	Sub	N/A
1208	TTTATATGTAAGAGAGTTTGTATACAATGAAATAGTATATGTGTAACAGGTTGCTGCTTGGAAAGACAAGGATGGGGATTGGTATGAAACAGG	TTTATATGTAAGAGAGTTTGTATACAATGAAATAGTATATGTGTAACAGGTTGCTGCTTGGAAAGACAAGGATGGGGTTTGGTATGAAACAAG	93	2	Sub	N/A
1209	TTTATATGTAAGAGAGTTTGTATACAATGAAATAGTATATGTGTAACAGGTTGCTGCTTGGAAAGACAAGGATGGGGATTGGTATGAAACAGG	TTTATATGTAAGAGAGTTTGTATACAATGAAATAGTAGATGTGTAACAGGTTGCTGCTTGGAAAGACAAGGATGGGGATTGGTAGGAAACAGG	93	2	Sub	N/A
1210	TTTATATGTAAGAGAGTTTGTATACAATGAAATAGTATATGTGTAACAGGTTGCTGCTTGGAAAGACAAGGATGGGGATTGGTATGAAACAGG	TTTATATGTAAGAGAGTTTGTATACAATGAAATAGTATATGTGTAATAGGTTGGTGCTTGGAAAGTCAAGGATGGGGATTGGTATGAAACAGG	93	2	Sub	N/A
1211	TTTATATGTAAGAGAGTTTGTATACAATGAAATAGTATATGTGTAACAGGTTGCTGCTTGGAAAGACAAGGATGGGGATTGGTATGAAACAGG	TTTATATGTAAGAGAGTTTGTATACAATGAAATAGTATATGTGTAACAGGTTGCTTCTTGGAAAGACAAGGATGGGGATTCGTATGAAACAGG	93	2	Sub	N/A
1212	TTTATATGTAAGAGAGTTTGTATACAATGAAATAGTATATGTGTAACAGGTTGCTGCTTGGAAAGACAAGGATGGGGATTGGTATGAAACAGG	TTTATATGTAAGAGAGTTTGTATACAATGAAATAGTATATGTGTAACAGGTTGCTGCTTGGAAAGAAAAGGACGGGGATTGGTATGAAACAGG	93	2	Sub	N/A
1213	TTTATATGTAAGAGAGTTTGTATACAATGAAATAGTATATGTGTAACAGGTTGCTGCTTGGAAAGACAAGGATGGGGATTGGTATGAAACAGG	TTTATATGTAAGAGAGTTTGTATACAATGAAATAGTATATGTGTAACAGGTTGCTGCTTGGAAAGACTAGGATGGGGATTGGTATGAAACACG	93	2	Sub	N/A
1214	TTTATATGTAAGAGAGTTTGTATACAATGAAATAGTATATGTGTAACAGGTTGCTGCTTGGAAAGACAAGGATGGGGATTGGTATGAAACAGG	TTTATATGTAAGAGAGTTTGTATACAATGAAATAGTATATGTGTAACAGGTTGCTGCTTGGAAAGACAAGGAAGGGGATTGGTATGCAACAGG	93	2	Sub	N/A
1215	TTTATATGTAAGAGAGTTTGTATACAATGAAATAGTATATGTGTAACAGGTTGCTGCTTGGAAAGACAAGGATGGGGATTGGTATGAAACAGG	TTTATATGTAAGAGAGTTTGTATACAATGAAATAGTATATGTGTAACAGGTTGCTGATTGGAAAGACAAGGATAGGGATTGGTATGAAACAGG	93	2	Sub	N/A
1216	TTTATATGTAAGAGAGTTTGTATACAATGAAATAGTATATGTGTAACAGGTTGCTGCTTGGAAAGACAAGGATGGGGATTGGTATGAAACAGG	TTTATATGTAAGAGAGTTTGTATACAATGAAATAGTATATGTGTAAAAGGTTGCTGATTGGAAAGACAAGGATGGGGATTGGTATGAAACAGG	93	2	Sub	N/A
1217	TTTATATGTAAGAGAGTTTGTATACAATGAAATAGTATATGTGTAACAGGTTGCTGCTTGGAAAGACAAGGATGGGGATTGGTATGAAACAGG	TTTATATGTAAGAGAGTTTGTATACAATGAAATAGTATATGTGTAATAGGTTGCTGTTTGGAAAGACGAGGATGGGGATTGGTATGAAACAGG	93	2	Sub	N/A
1218	TTTATATGTAAGAGAGTTTGTATACAATGAAATAGTATATGTGTAACAGGTTGCTGCTTGGAAAGACAAGGATGGGGATTGGTATGAAACAGG	TTTATATGTAAGAGAGTTTGTATACCATGAAATAGTATATGTGTAACAGGTTGCTGCTTGGAAAGAGAAGGATGGGGATTGGTATGAAACAGG	93	2	Sub	N/A
1219	TTTATATGTAAGAGAGTTTGTATACAATGAAATAGTATATGTGTAACAGGTTGCTGCTTGGAAAGACAAGGATGGGGATTGGTATGAAACAGG	TTTATATGTAAGAGAGTTTGTATACAATGAAATAGTATATGTGTAACAGGTTGGTGGTTGGAAAGACAAGGATGGGGATTGGTATGAAACAGG	93	2	Sub	N/A
1220	TTTATATGTAAGAGAGTTTGTATACAATGAAATAGTATATGTGTAACAGGTTGCTGCTTGGAAAGACAAGGATGGGGATTGGTATGAAACAGG	TTTATATGTAAGAGAGTTTGTATACAATGAAATAGTATATGTGTAACAGGTTGCTGCTTGGAAAGACAAGGATGGTGATTCGTATGAAACAGG	93	2	Sub	N/A
1221	TTTATATGTAAGAGAGTTTGTATACAATGAAATAGTATATGTGTAACAGGTTGCTGCTTGGAAAGACAAGGATGGGGATTGGTATGAAACAGG	TTTATATGTAAGAGAGTTTGTATACAATGAAATAGTATATGTGTAACAGGTTGCTGCTTGGAAAGACAACGATAGGGATTGGTATGAAACAGG	93	2	Sub	N/A
1222	TTTATATGTAAGAGAGTTTGTATACAATGAAATAGTATATGTGTAACAGGTTGCTGCTTGGAAAGACAAGGATGGGGATTGGTATGAAACAGG	TTTATATGTAAGAGAGTTTGTATACAATGAAATAGTATATGTGTAACAGGTTCCTGCTTGGAAAGACACGGATGGGGATTGGTATGAAACAGG	93	2	Sub	N/A
1223	TTTATATGTAAGAGAGTTTGTATACAATGAAATAGTATATGTGTAACAGGTTGCTGCTTGGAAAGACAAGGATGGGGATTGGTATGAAACAGG	TTTATATGTAAGAGAGTTTGTATACAATGAAATAGTATATGTGTAACAGGGTGCTGCTTGGAAAGACAAGGATGGGGATTGCTATGAAACAGG	93	2	Sub	N/A
1224	TTTATATGTAAGAGAGTTTGTATACAATGAAATAGTATATGTGTAACAGGTTGCTGCTTGGAAAGACAAGGATGGGGATTGGTATGAAACAGG	TTTATATGTAAGAGAGTTTGTATACAATGAAATAGTATATGTGTAACAGGTTGCTGCTTGGAAAGATAAGGATGGGGATTGGTATGGAACAGG	93	2	Sub	N/A
1225	TTTATATGTAAGAGAGTTTGTATACAATGAAATAGTATATGTGTAACAGGTTGCTGCTTGGAAAGACAAGGATGGGGATTGGTATGAAACAGG	TTTATATGTAAGAGAGTTTGTATACAATGAAATAGTATATGTGTAACAGGTTGATGGTTGGAAAGACAAGGATGGGGATTGGTATGAAACAGG	93	2	Sub	N/A
1226	TTTATATGTAAGAGAGTTTGTATACAATGAAATAGTATATGTGTAACAGGTTGCTGCTTGGAAAGACAAGGATGGGGATTGGTATGAAACAGG	TTTATATGTAAGAGTGTTTGTATACAATGAAATAGTATATGTGTAACAGGTTGCTGATTGGAAAGACAAGGATGGGGATTGGTATGAAACAGG	93	2	Sub	N/A
1227	TTTATATGTAAGAGAGTTTGTATACAATGAAATAGTATATGTGTAACAGGTTGCTGCTTGGAAAGACAAGGATGGGGATTGGTATGAAACAGG	TTTATATGTAAGAGAGTTTGTATACAATGAAATAGTATATGTGTAACAGGTTGCTGCTTGGAAAGAGCTGGATGGGGATTGGTATGAAACAGG	93	2	Sub	N/A
1228	TTTATATGTAAGAGAGTTTGTATACAATGAAATAGTATATGTGTAACAGGTTGCTGCTTGGAAAGACAAGGATGGGGATTGGTATGAAACAGG	TTTATATGTAAGAGAGTTTGTATACAATGAAATAGTGTATGTGTAACAGGTTGCTGCTTGGAAAGAC----ATGGGGATTGGTATGACACAGG	89	2	del	N/A
1229	TTTATATGTAAGAGAGTTTGTATACAATGAAATAGTATATGTGTAACAGGTTGCTGCTTGGAAAGACAAGGATGGGGATTGGTATGAAACAGG	TTTATATGTAAGAGAGTTTGTATACAATGAAATAGTATATGTGTAACAGGTTGCTGCTTGGAAAGATAAGGATGGGGATGGGTATGAAACAGG	93	2	Sub	N/A
1230	TTTATATGTAAGAGAGTTTGTATACAATGAAATAGTATATGTGTAACAGGTTGCTGCTTGGAAAGACAAGGATGGGGATTGGTATGAAACAGG	TTTATATGTAAGAGAGTTTGTATACAATGAAATAGTATATGTGTAACAGGTTGCTGCCTGGAAAGACAAGGATGGGGATTGGCATGAAACAGG	93	2	Sub	N/A
1231	TTTATATGTAAGAGAGTTTGTATACAATGAAATAGTATATGTGTAACAGGTTGCTGCTTGGAAAGACAAGGATGGGGATTGGTATGAAACAGG	TTTATATGTAAGAGAGTTTGTATACAATGAAATAGTATATGTGTAACAGGTTGCTGCTTGGAAAGACGAGGATGGGGCTTGGTATGAGACAGG	93	2	Sub	N/A
1232	TTTATATGTAAGAGAGTTTGTATACAATGAAATAGTATATGTGTAACAGGTTGCTGCTTGGAAAGACAAGGATGGGGATTGGTATGAAACAGG	TTTATATGTAAGAGAGTTTGTATACAATGAAATAGTATATGTGTAACAGGTTGCTGCTTGGAAAGATTTGGATGGGGGTTGGTATGAAACAGG	93	2	Sub	N/A
1233	TTTATATGTAAGAGAGTTTGTATACAATGAAATAGTATATGTGTAACAGGTTGCTGCTTGGAAAGACAAGGATGGGGATTGGTATGAAACAGG	TTTATATGTAAGAGAGTTTGTATACAATGAAATAGTATATGTGTAACAGGTTGGTGCTTGGAAAGAAAAGGATGGGGATTGGTATGAAACAGG	93	2	Sub	N/A
1234	TTTATATGTAAGAGAGTTTGTATACAATGAAATAGTATATGTGTAACAGGTTGCTGCTTGGAAAGACAAGGATGGGGATTGGTATGAAACAGG	TTTATATGTAAGAGAGTTTGTATACAATGAAATAGTATATGTGTAACAGGTTGCGGCTTGGAAAGACTAGGATGGGGATTCGTATGAAACAGG	93	2	Sub	N/A
1235	TTTATATGTAAGAGAGTTTGTATACAATGAAATAGTATATGTGTAACAGGTTGCTGCTTGGAAAGACAAGGATGGGGATTGGTATGAAACAGG	TTTATATGTAAGAGAGTTTGTATACAATGAAATAGTATATGTGTAATAGGTGGCGGCGTGGAAAGACAAGGATGGGGATTGGTATGAAACAGG	93	2	Sub	N/A
1236	TTTATATGTAAGAGAGTTTGTATACAATGAAATAGTATATGTGTAACAGGTTGCTGCTTGGAAAGACAAGGATGGGGATTGGTATGAAACAGG	TTTATATGTAAGAGAGTTTGTATACAATGAAATAGTATATGTGTAACAGGTTGCTGCTTGGAAAGGCAGGGATGGGGATTGGTATGAAACAGG	93	2	Sub	N/A
1237	TTTATATGTAAGAGAGTTTGTATACAATGAAATAGTATATGTGTAACAGGTTGCTGCTTGGAAAGACAAGGATGGGGATTGGTATGAAACAGG	TTTATATGTAAGAGAGTTTGTACACAATGAAATAGTATATGTGTAACGGGTTGCTGCTTGGAAAGACAAGGATGGGGATTGGTATGAAACAGG	93	2	Sub	N/A
1238	TTTATATGTAAGAGAGTTTGTATACAATGAAATAGTATATGTGTAACAGGTTGCTGCTTGGAAAGACAAGGATGGGGATTGGTATGAAACAGG	TTTATATGTAAGAGAGTTTGTATACAATGAAATAGTATATGTGTATCTGGTTGCTGCTTGGAAAGAAAAGGATGGGGATTGGTATGAAACAGG	93	2	Sub	N/A
1239	TTTATATGTAAGAGAGTTTGTATACAATGAAATAGTATATGTGTAACAGGTTGCTGCTTGGAAAGACAAGGATGGGGATTGGTATGAAACAGG	TTTATATGTAAGAGAGTTTGTATACAATGAAATAGTATATGTGTAACTGGTTGCTGCTTGGAAAGACTAGGATGGGGATTCGTATGAAACAGG	93	2	Sub	N/A
1240	TTTATATGTAAGAGAGTTTGTATACAATGAAATAGTATATGTGTAACAGGTTGCTGCTTGGAAAGACAAGGATGGGGATTGGTATGAAACAGG	TTTATATGTAAGAGAGTTTGTATACAATGAAATAGTATATGTGTAACAGGTTGTTGCTTGGAAAGACAAGGATGGGGATCGGTATGAAACAGG	93	2	Sub	N/A
1241	TTTATATGTAAGAGAGTTTGTATACAATGAAATAGTATATGTGTAACAGGTTGCTGCTTGGAAAGACAAGGATGGGGATTGGTATGAAACAGG	TTTATATGTAAGAGAGTTTGTATACAATGAAATAGTATATGTGTAACAGGGTGCTGCTTGGAAAGACAAGGATGGGGATTGGTATGAGACAGG	93	2	Sub	N/A
1242	TTTATATGTAAGAGAGTTTGTATACAATGAAATAGTATATGTGTAACAGGTTGCTGCTTGGAAAGACAAGGATGGGGATTGGTATGAAACAGG	TTTATATGTAAGAGAGGTTGTATACAATGAAATAGTATATGTGTAATAGGTTGCTGCTTGGAAAGACAAGGATGGGGATTGGGATGAAACAGG	93	2	Sub	N/A
1243	TTTATATGTAAGAGAGTTTGTATACAATGAAATAGTATATGTGTAACAGGTTGCTGCTTGGAAAGACAAGGAT------------------GGGGATTGGTATGAAACAGG	TTTATATGTAAGAGAGTTTGTATACAATGAAATAGTATATGTGTAATAGGTTGCTGCTTGGAAAGACAAGGATGGGGATTAGTATGAAACAGGGGATTGGTATGAAACAGG	111	2	Ins	N/A
1244	TTTATATGTAAGAGAGTTTGTATACAATGAAATAGTATATGTGTAACAGGTTGCTGCTTGGAAAGACAAGGATGGGGATTGGTATGAAACAGG	TTTATATGTAAGAGAGTTTGTATGCAATGAAATAGTATATGTGTAACAGGTTGCTGCTTGGAAAGAGAAGGATGGGGATTGGTATGAAACAGG	93	2	Sub	N/A
1245	TTTATATGTAAGAGAGTTTGTATACAATGAAATAGTATATGTGTAACAGGTTGCTGCTTGGAAAGACAAGGATGGGGATTGGTATGAAACAGG	TTTATATGTAAGAGAGTTTGTATACAATGAAATAGTATATGTGTAATCGGTTGCTGCTTGGAAAGACCCGGATGGGGCTTGGTATGAAACAGG	93	2	Sub	N/A
1246	TTTATATGTAAGAGAGTTTGTATACAATGAAATAGTATATGTGTAACAGGTTGCTGCTTGGAAAGACAAGGATGGGGATTGGTATGAAACAGG	TTTATATGTAAGAGAGTTTGTATACAATGAAATAGTATATGTGTAACCGGTTGCTGCTTGGAAAGACACGGATGGGGATTCGTATGAAACAGG	93	2	Sub	N/A
1247	TTTATATGTAAGAGAGTTTGTATACAATGAAATAGTATATGTGTAACAGGTTGCTGCTTGGAAAGACAAGGATGGGGATTGGTATGAAACAGG	TTTATATGTAAGAGAGTTTGTATACAATGAAATAGTATATGTGTAACAGGTTGTTGCTTGGAAAGACGCGGATGGGGATTGGTATGAAACAGG	93	2	Sub	N/A
1248	TTTATATGTAAGAGAGTTTGTATACAATGAAATAGTATATGTGTAACAGGTTGCTGCTTGGAAAGACAAGGATGGGGATTGGTATGAAACAGG	TTTATATGTAAGAGAGTTTGTATACAATGAAATAGTATATGTGTAATCGGTTCCTGCTTGGAAAGACAAGGATGGGGATTCGTATGAAACAGG	93	2	Sub	N/A
1249	TTTATATGTAAGAGAGTTTGTATACAATGAAATAGTATATGTGTAACAGGTTGCTGCTTGGAAAGACAAGGATGGGGATTGGTATGAAACAGG	TTTATATGTAAGAGAGTTTGTATACAATGAAATAGTATATGTGTAATCGGTTGCTGCTTGGAAAGACCAGGATGGGGATTGGTATGAAACAGG	93	2	Sub	N/A
1250	TTTATATGTAAGAGAGTTTGTATACAATGAAATAGTATATGTGTAACAGGTTGCTGCTTGGAAAGACAAGGATGGGGATTGGTATGAAACAGG	TTTATATGTAAGAGAGTTTGTATACAATGAAATAGTGTATGTGTAACAGGTTGCTGCTTAGAAAGACAAGGATGGGGATTGGTATGAAACAGG	93	2	Sub	N/A
1251	TTTATATGTAAGAGAGTTTGTATACAATGAAATAGTATATGTGTAACAGGTTGCTGCTTGGAAAGACAAGGATGGGGATTGGTATGAAACAGG	TTTATATGTACGAGAGTTTGTATACAATGAAATAGTATATGTGTAATAGGTTGCTGCTTGGAAAGACAAGGATGGGGATTGGTATGAAACAGG	93	2	Sub	N/A
1252	TTTATATGTAAGAGAGTTTGTATACAATGAAATAGTATATGTGTAACAGGTTGCTGCTTGGAAAGACAAGGATGGGGATTGGTATGAAACAGG	TTTATATGTAAGAGAGTTTGTATACAATGAAATAGTATATGTGTAACTGGTTGCTGCTTGGAAAGAAAAAGATGGGGATTGGTATGAAACAGG	93	2	Sub	N/A
1253	TTTATATGTAAGAGAGTTTGTATACAATGAAATAGTATATGTGTAACAGGTTGCTGCTTGGAAAGACAAGGATGGGGATTGGTATGAAACAGG	TTTATATGTAAGAGAGTTTGTATACAATGAAATAGTATATGTGTAACAGGGGGCTGCTTGGAAAGACAAGGATGGGGATTGGTATGAAACAGG	93	2	Sub	N/A
1254	TTTATATGTAAGAGAGTTTGTATACAATGAAATAGTATATGTGTAACAGGTTGCTGCTTGGAAAGACAAGGATGGGGATTGGTATGAAACAGG	TTTATATGTAAGAGAGTTTGTATACAATGAAATAGTATATGTGTAACGGGTTGATGCTTGGAAAGAAAAGGATGGGGATTTGTATGAAACAGG	93	2	Sub	N/A
1255	TTTATATGTAAGAGAGTTTGTATACAATGAAATAGTATATGTGTAACAGGTTGCTGCTTGGAAAGACAAGGATGGGGATTGGTATGAAACAGG	TTTATATGTAAGAGAGTTTGTATACAATGAAATAGTATATGTGTAACAGGTTGCTTCTTGGAAAGACAAGGATGGGGATTGGTATGGAACAGG	93	2	Sub	N/A
1256	TTTATATGTAAGAGAGTTTGTATACAATGAAATAGTATATGTGTAACAGGTTGCTGCTTGGAAAGACAAGGATGGGGATTGGTATGAAACAGG	TTTATATGTAAGAGAGTTTGTATACAATGAAATAGTATATGTGTAACAGGTTGCTTCTTGGAAAGAAAAGGATGGGGATTGGTATGAAACAGG	93	2	Sub	N/A
1257	TTTATATGTAAGAGAGTTTGTATACAATGAAATAGTATATGTGTAACAGGTTGCTGCTTGGAAAGACAAGGAT------------------GGGGATTGGTATGAAACAGG	TTTATATGTAAGAGAGTTTGTATACAATGAAATAGTATATGTGTAACAGGTTGCTGCTTGGAAAGACAAGGATGGGGATTGGTAGGAAACAGGGGATTGGTATGAAACAGG	111	2	Ins	N/A
1258	TTTATATGTAAGAGAGTTTGTATACAATGAAATAGTATATGTGTAACAGGTTGCTGCTTGGAAAGACAAGGATGGGGATTGGTATGAAACAGG	TTTATATGTAAGAGAGTTTGTATACAATGAAATAGTATATGTGTAACGGGTTGCTGCTTGGAAAGACAAGGGTGGGGATTGGTATGAAACAGG	93	2	Sub	N/A
1259	TTTATATGTAAGAGAGTTTGTATACAATGAAATAGTATATGTGTAACAGGTTGCTGCTTGGAAAGACAAGGATGGGGATTGGTATGAAACAGG	TTTATATGTAAGAGAGTTTGTATACAATGAAATAGTATATGTGTAATAGGTTGGTGCTTGGAAAGACAACGATGGGGATTGGTATGAAACAGG	93	2	Sub	N/A
1260	TTTATATGTAAGAGAGTTTGTATACAATGAAATAGTATATGTGTAACAGGTTGCTGCTTGGAAAGACAAGGATGGGGATTGGTATGAAACAGG	TTTATATGTAAGAGAGTTTGTATACAATGAAATAGTATATGTGTAACAGGTTGCTGCTGGGAAAGACAAGGATGGGGATTTGTATGAAACAGG	93	2	Sub	N/A
1261	TTTATATGTAAGAGAGTTTGTATACAATGAAATAGTATATGTGTAACAGGTTGCTGCTTGGAAAGACAAGGATGGGGATTGGTATGAAACAGG	TTTATATGTAAGAGAGTTTGTATACAATGAAATAGTATATGTGTAACAGGTTGCTGCTTGGAAAGACAA----GGGGATTAGTATGAAACAGG	89	2	del	N/A
1262	TTTATATGTAAGAGAGTTTGTATACAATGAAATAGTATATGTGTAACAGGTTGCTGCTTGGAAAGACAAGGATGGGGATTGGTATGAAACAGG	TTTATATGTAAGAGAGTTTGTATACAATGAAATAGTATATGTGTAACAGGTTGCTGGTGGGAAAGAC----ATGGGGATTAGTATGAAACAGG	89	2	del	N/A
1263	TTTATATGTAAGAGAGTTTGTATACAATGAAATAGTATATGTGTAACAGGTTGCTGCTTGGAAAGACAAGGATGGGGATTGGTATGAAACAGG	TTTATATGTAAGAGAGTTTGTATACAATGAAATAGTATATGTGTAACAGGTTGCTGCTTGGCAAGACAAGGATGGGGATTGGGATGAAACAGG	93	2	Sub	N/A
1264	TTTATATGTAAGAGAGTTTGTATACAATGAAATAGTATATGTGTAACAGGTTGCTGCTTGGAAAGACAAGGATGGGGATTGGTATGAAACAGG	TTTATATGTAAGAGAGTTT-TATATAATGAAATAGTGTATGTATAACAGGTTGCTGCTTGGAAAGACAAGGATGGGGATTGGTATGAAACAGG	92	2	del	N/A
1265	TTTATATGTAAGAGAGTTTGTATACAATGAAATAGTATATGTGTAACAGGTTGCTGCTTGGAAAGACAAGGATGGGGATTGGTATGAAACAGG	TTTATATGTAAGAGAGTTTGTATACAATGAAATGGTATATGTGTAACGGGTTGCTGCTTGGAAAGACAAGGATGGGGATTGGTATGAAACAGG	93	2	Sub	N/A
1266	TTTATATGTAAGAGAGTTTGTATACAATGAAATAGTATATGTGTAACAGGTTGCTGCTTGGAAAGACAAGGATGGGGATTGGTATGAAACAGG	TTTATATGTAAGAGAGTTTGTATACAATGAAATAGTATATGTGTAACAGGTTGCTGCTTGGAAAGACAAGGAGGGGGATTGGTATGAAACATG	93	2	Sub	N/A
1267	TTTATATGTAAGAGAGTTTGTATACAATGAAATAGTATATGTGTAACAGGTTGCTGCTTGGAAAGACAAGGATGGGGATTGGTATGAAACAGG	TTTATATGTAAGAGAGTTTGTATACAATGAAATAGTATATGTGTAACTGGTTGCTGCTTGGAAAGACAAGGATGGGGATTGATATGAAACAGG	93	2	Sub	N/A
1268	TTTATATGTAAGAGAGTTTGTATACAATGAAATAGTATATGTGTAACAGGTTGCTGCTTGGAAAGACAAGGATGGGGATTGGTATGAAACAGG	TTTATATGTAAGAGAGTTTGTATACAATGAAATAGTATATGTGTAACAGGTTTCTGCTTGGAAAGACGAGGATGGGGATTAGTATGAAACAGG	93	2	Sub	N/A
1269	TTTATATGTAAGAGAGTTTGTATACAATGAAATAGTATATGTGTAACAGGTTGCTGCTTGGAAAGACAAGGATGGGGATTGGTATGAAACAGG	TTTATATGTAAGAGAGTTTGTATACAATGAAATAGTATATGTGTAACAGGTTGCTGCTTGGAAAGACAAGGATGGGGCTTGGTATGAACCAGG	93	2	Sub	N/A
1270	TTTATATGTAAGAGAGTTTGTATACAATGAAATAGTATATGTGTAACAGGTTGCTGCTTGGAAAGACAAGGATGGGGATTGGTATGAAACAGG	TTTATATGTAAGAGAGTTTGTATACAATGAAATAGTATATGTGTAACAGGTTGCTGCTTGGAAAGAGAAGGATGGGGATTGGTATGAAACACG	93	2	Sub	N/A
1271	TTTATATGTAAGAGAGTTTGTATACAATGAAATAGTATATGTGTAACAGGTTGCTGCTTGGAAAGACAAGGATGGGGATTGGTATGAAACAGG	TTTATATGTAAGAGAGTTTGTATACAATGAAATATTATATGTGTAACAGGTTGCTGCTTGGAAAGACAAGGATGGGGATTGGTATGAAACACG	93	2	Sub	N/A
1272	TTTATATGTAAGAGAGTTTGTATACAATGAAATAGTATATGTGTAACAGGTTGCTGCTTGGAAAGACAAGGATGGGGATTGGTATGAAACAGG	TTTATATGTAAGAGAGTTTGTATACAATGAAATAGTATATGTGTAACCGGTTGCTGCTTGGAAAGACAAGGATGGGGCTTAGTATGAAACAGG	93	2	Sub	N/A
1273	TTTATATGTAAGAGAGTTTGTATACAATGAAATAGTATATGTGTAACAGGTTGCTGCTTGGAAAGACAAGGATGGGGATTGGTATGAAACAGG	TTTATATGTAAGAGAGTTTGTATACAATGAAATAGTATATGTGTAACAGGTTGCTGCTTGGAAAGACATGGATGGGGATTGATATGAAACAGG	93	2	Sub	N/A
1274	TTTATATGTAAGAGAGTTTGTATACAATGAAATAGTATATGTGTAACAGGTTGCTGCTTGGAAAGACAAGGATGGGGATTGGTATGAAACAGG	TTTATATGTAAGAGAGTTTGTATACAATGAAATAGTATATGTGTAATAGGTTACTGCTTGGAAAGACAAGGATGGGGATTGGTATGAAACACG	93	2	Sub	N/A
1275	TTTATATGTAAGAGAGTTTGTATACAATGAAATAGTATATGTGTAACAGGTTGCTGCTTGGAAAGACAAGGATGGGGATTGGTATGAAACAGG	TTTATATGTAAGAGAGTTTGTATACAATGAAATAGTATATGTGTAAGAGGTTGCTGCTTGGAAAGACAAGGATGGGGATTGGTATGAAAAAGG	93	2	Sub	N/A
1276	TTTATATGTAAGAGAGTTTGTATACAATGAAATAGTATATGTGTAACAGGTTGCTGCTTGGAAAGACAAGGATGGGGATTGGTATGAAACAGG	TTTATATGTAAGAGAGTTTGTATACAATGAAATAGTATATGTGTAATTGGTTGCTGCTTGGAAAGACAAAGATGGGGATTGGTATGAAACAGG	93	2	Sub	N/A
1277	TTTATATGTAAGAGAGTTTGTATACAATGAAATAGTATATGTGTAACAGGTTGCTGCTTGGAAAGACAAGGATGGGGATTGGTATGAAACAGG	TTTATATGTAAGAGAGTTTGTATACAATTAAATAGTATATGTGTAACAGGTTGCTGCTTGGAAAGACAAGGATGGGGATTCGTATGAAACAGG	93	2	Sub	N/A
1278	TTTATATGTAAGAGAGTTTGTATACAATGAAATAGTATATGTGTAACAGGTTGCTGCTTGGAAAGACAAGGATGGGGATTGGTATGAAACAGG	TTTATATGTAAGAGAGTTTGTATACAATGAAATAGTATATGTGTAATTGGTTGATGCTTGGAAAGACAAGGATGGGGATTGGTATGAAACAGG	93	2	Sub	N/A
1279	TTTATATGTAAGAGAGTTTGTATACAATGAAATAGTATATGTGTAACAGGTTGCTGCTTGGAAAGACAAGGATGGGGATTGGTATGAAACAGG	TTTATATGTAAGAGAGTTTGTATACAATGAAATAGTATATGTGTAATAGGTTTCTGCTTGGAAAGACAAGGATGGGGATTTGTATGAAACAGG	93	2	Sub	N/A
1280	TTTATATGTAAGAGAGTTTGTATACAATGAAATAGTATATGTGTAACAGGTTGCTGCTTGGAAAGACAAGGATGGGGATTGGTATGAAACAGG	TTTATATGTAAGAGAGTTTGTATACAATGAAATAGTATATGTGTAACAGGTTGCTGCTTGGAACGACAAGGATGGGGATTGGTATGAAACATG	93	2	Sub	N/A
1281	TTTATATGTAAGAGAGTTTGTATACAATGAAATAGTATATGTGTAACAGGTTGCTGCTTGGAAAGACAAGGATGGGGATTGGTATGAAACAGG	TTTATATGTAAGAGAGTTTGTATACAATGAAATAGTATATGTGTAATAGGTTGCTGCTTGGAAAGACATGGATGGGGATTTGTATGAAACAGG	93	2	Sub	N/A
1282	TTTATATGTAAGAGAGTTTGTATACAATGAAATAGTATATGTGTAACAGGTTGCTGCTTGGAAAGACAAGGAT------------------GGGGATTGGTATGAAACAGG	TTTATATGTAAGAGAGTTTGTATACAATGAAATAGTATATGTGTAACAGGTTGCTGCTTGGAAAGACAAGGATGGGGATTGGTATGAAGCAGGGGATTGGTATGAAACAGG	111	2	Ins	N/A
1283	TTTATATGTAAGAGAGTTTGTATACAATGAAATAGTATATGTGTAACAGGTTGCTGCTTGGAAAGACAAGGATGGGGATTGGTATGAAACAGG	TTTATATGTAAGAGAGTTTGTATACAATGAAATAGTATATGTGTAACTGGTTGCTGCTTGGAAAGACAAGGATGGGGTTTGGTATGAAACAGG	93	2	Sub	N/A
1284	TTTATATGTAAGAGAGTTTGTATACAATGAAATAGTATATGTGTAACAGGTTGCTGCTTGGAAAGACAAGGATGGGGATTGGTATGAAACAGG	TTTATATGTAAGAGAGTTTGTATACAATGAAATAGTATATGTGTAACAGGTTGCTGCTTGGAAAGAAAAGGATGGTGATTGGTATGAAACAGG	93	2	Sub	N/A
1285	TTTATATGTAAGAGAGTTTGTATACAATGAAATAGTATATGTGTAACAGGTTGCTGCTTGGAAAGACAAGGATGGGGATTGGTATGAAACAGG	TTTATATGTAAGAGAGTTTGTATACAATGAAATAGTGTATGTGTAACGGGTTGCTGCTTGGAAAGACAAGGATGGGGATTGGTATGACACAGG	93	2	Sub	N/A
1286	TTTATATGTAAGAGAGTTTGTATACAATGAAATAGTATATGTGTAACAGGTTGCTGCTTGGAAAGACAAGGATGGGGATTGGTATGAAACAGG	TTTATATGTAAGAGAGTTTGTATACAATGAAATAGTATATGTGTAATAGGTTGCTGCTTGGAAAGACATACATGGGGATTGGTATGAAACAGG	93	2	Sub	N/A
1287	TTTATATGTAAGAGAGTTTGTATACAATGAAATAGTATATGTGTAACAGGTTGCTGCTTGGAAAGACAAGGATGGGGATTGGTATGAAACAGG	TTTATATGTAAGAGAGTTTGTATACAATGAAATAGTATATGTGTAACAGGTTGCTGCTTGGAAAGACAAGGAGGGGGATTGGTATGAAAAAGG	93	2	Sub	N/A
1288	TTTATATGTAAGAGAGTTTGTATACAATGAAATAGTATATGTGTAACAGGTTGCTGCTTGGAAAGACAAGGATGGGGATTGGTATGAAACAGG	TTTATATGTAAGAGAGTTTGTATACAATGAAATAGTATATGTGTAACAGGTTTCTGCTTGGAAAGACAAGGATGGGGCTTGGTATGAAACAGG	93	2	Sub	N/A
1289	TTTATATGTAAGAGAGTTTGTATACAATGAAATAGTATATGTGTAACAGGTTGCTGCTTGGAAAGACAAGGATGGGGATTGGTATGAAACAGG	TTTATATGTAAGAGAGTTTGTATACAATGAAATAGTATATGTGTAATTGGTTGCTGCATGGAAAGACAAGGATGGGGATTGGTATGAAACAGG	93	2	Sub	N/A
1290	TTTATATGTAAGAGAGTTTGTATACAATGAAATAGTATATGTGTAACAGGTTGCTGCTTGGAAAGACAAGGATGGGGATTGGTATGAAACAGG	TTTATATGTAAGAGAGTTTGTATATAATGGAATAGTGTATGTGTAACGGGTTGCTGCTGGGAAAGACAAGGATGGGGATTGGTATGAAACAGG	93	2	Sub	N/A
1291	TTTATATGTAAGAGAGTTTGTATACAATGAAATAGTATATGTGTAACAGGTTGCTGCTTGGAAAGACAAGGATGGGGATTGGTATGAAACAGG	TTTATATGTAAGAGAGTTTGTATACAATGAAATAGTATATGTGTAACAGGTTGCTGCTTGGAAAGACAAGGACGGGGATTCGTATGAAACAGG	93	2	Sub	N/A
1292	TTTATATGTAAGAGAGTTTGTATACAATGAAATAGTATATGTGTAACAGGTTGCTGCTTGGAAAGACAAGGATGGGGATTGGTATGAAACAGG	TTTATATGTAAGAGAGTTTGTATACAATGAAATAGTATATGTGTAATAGGGTGCTGCTTGGAAAGACAAGGATGGGGATTGGTATGAAAAAGG	93	2	Sub	N/A
1293	TTTATATGTAAGAGAGTTTGTATACAATGAAATAGTATATGTGTAACAGGTTGCTGCTTGGAAAGACAAGGATGGGGATTGGTATGAAACAGG	TTTATATGTAAGAGAGTTTGTATACAATGAAATAGTGTATGTGTAACAGGTTGCTGCTTAAAAAGAC----ATGGGGATTGGTATGAAACAGG	89	2	del	N/A
1294	TTTATATGTAAGAGAGTTTGTATACAATGAAATAGTATATGTGTAACAGGTTGCTGCTTGGAAAGACAAGGATGGGGATTGGTATGAAACAGG	TTTATATGTAAGAGAGTTTGTATATAATGGAATAGTGTATGTGTAACGGGTTGCTGCTTGGAAAGACAAGGATGGGGATTGGTATGAGACAGG	93	2	Sub	N/A
1295	TTTATATGTAAGAGAGTTTGTATACAATGAAATAGTATATGTGTAACAGGTTGCTGCTTGGAAAGACAAGGATGGGGATTGGTATGAAACAGG	TTTATATGTAAGAGAGTTTGTATACAATGAAATAGTATATGTGTAATCGGTTGCTGCTTGGAAAGACAAGGATGGGGCTTGGTATGAAACAGG	93	2	Sub	N/A
1296	TTTATATGTAAGAGAGTTTGTATACAATGAAATAGTATATGTGTAACAGGTTGCTGCTTGGAAAGACAAGGATGGGGATTGGTATGAAACAGG	TTTATATGTAAGAGAGTTTGTATATAATGGAATAGTGTATGTGTAACGGGTTGTTGCTTGGAAAGACAAGGATGGGGATTGGTATGAAACAGG	93	2	Sub	N/A
1297	TTTATATGTAAGAGAGTTTGTATACAATGAAATAGTATATGTGTAACAGGTTGCTGCTTGGAAAGACAAGGATGGGGATTGGTATGAAACAGG	TTTATATGTAAGAGAGTTTGTATACAATGAAATAGTATATGTTTAACAGGTTGCTGCTTGGAAAGACAAGGATGGGGATTGGTATGCAACAGG	93	2	Sub	N/A
1298	TTTATATGTAAGAGAGTTTGTATACAATGAAATAGTATATGTGTAACAGGTTGCTGCTTGGAAAGACAAGGATGGGGATTGGTATGAAACAGG	TTTATATGTAAGAGAGTTTGTATACAATGAAATAGTATATGTGTAACAGGTTGCTGCTTGGAAAGACAAGCATGGGGATTGGTATGAAACACG	93	2	Sub	N/A
1299	TTTATATGTAAGAGAGTTTGTATACAATGAAATAGTATATGTGTAACAGGTTGCTGCTTGGAAAGACAAGGATGGGGATTGGTATGAAACAGG	TTTATATGTAAGAGAGTTTGTATACAATGAAATAGTATATGTGTAACAGGTTGCTGCTTGGAAAGACAAGGATAGGGATTAGTATGAAACAGG	93	2	Sub	N/A
1300	TTTATATGTAAGAGAGTTTGTATACAATGAAATAGTATATGTGTAACAGGTTGCTGCTTGGAAAGACAAGGATGGGGATTGGTATGAAACAGG	TTTATATGTAAGAGAGTTTGTATACAATGAAATAGTATATGTGTAACATGTTGCTGCTTGGAAAGACAAGGATGTGGTTTGGTATGAAACAGG	93	2	Sub	N/A
1301	TTTATATGTAAGAGAGTTTGTATACAATGAAATAGTATATGTGTAACAGGTTGCTGCTTGGAAAGACAAGGATGGGGATTGGTATGAAACAGG	TTTATATGTAAGAGAGTTTGTATACAATGAAATAGTATATGTGTAACAGGTTGCTGCATGGAAAGACAAGGATGGGGATTGGTATGAAAAAGG	93	2	Sub	N/A
1302	TTTATATGTAAGAGAGTTTGTATACAATGAAATAGTATATGTGTAACAGGTTGCTGCTTGGAAAGACAAGGATGGGGATTGGTATGAAACAGG	TTTATATGTAAGAGAGTTTGTATACAATGAAATAGTATATGTGTAACAGGTTGCTGCTTGGAAAGACAAGCATGGGGATTGCTATGAAACAGG	93	2	Sub	N/A
1303	TTTATATGTAAGAGAGTTTGTATACAATGAAATAGTATATGTGTAACAGGTTGCTGCTTGGAAAGACAAGGATGGGGATTGGTATGAAACAGG	TTTATATGTAAGAGAGTTTGTATACAATGAAATAGTATATGTGTAACAGGTTGCTGCTTGGAAAGACAAGGACGGGGATTGCTATGAAACAGG	93	2	Sub	N/A
1304	TTTATATGTAAGAGAGTTTGTATACAATGAAATAGTATATGTGTAACAGGTTGCTGCTTGGAAAGACAAGGATGGGGATTGGTATGAAACAGG	TTTATATGTACGAGAGTTTGTATACAATGAAATAGTATATGTGTAACAGGTTGCTGCTTGGAAAGACAAGGATGGGGATTGGTATGAAAAAGG	93	2	Sub	N/A
1305	TTTATATGTAAGAGAGTTTGTATACAATGAAATAGTATATGTGTAACAGGTTGCTGCTTGGAAAGACAAGGATGGGGATTGGTATGAAACAGG	TTTATATGTAAGAGAGTTTGTATACAATGAAATAGTATATGTGTAACAGGTTGCTGCTTGGAAAGCCAAGGATGGGGATTGGTATGCAACAGG	93	2	Sub	N/A
1306	TTTATATGTAAGAGAGTTTGTATACAATGAAATAGTATATGTGTAACAGGTTGCTGCTTGGAAAGACAAGGATGGGGATTGGTATGAAACAGG	TTTATATGTAAGAGAGTTTGTATACAATGAAATAGTATATGTGTCATAGGTTGCTGCTTGGAAAGACAAGGATGGGGATTGGTATGAAACAGG	93	2	Sub	N/A
1307	TTTATATGTAAGAGAGTTTGTATACAATGAAATAGTATATGTGTAACAGGTTGCTGCTTGGAAAGACAAGGATGGGGATTGGTATGAAACAGG	TTTATATGTAAGAGAGTTTGTATACAATGAAATAGTATATGTGTAACAGGTTGCTGCTTGGAAAGACAAGGCTGGGGATTCGTATGAAACAGG	93	2	Sub	N/A
1308	TTTATATGTAAGAGAGTTTGTATACAATGAAATAGTATATGTGTAACAGGTTGCTGCTTGGAAAGACAAGGATGGGGATTGGTATGAAACAGG	TTTATATGTAAGAGAGTTTGTATATAATGAAACAGTGTATGTGTAACAGGTTGCTGCTTGGAAAGAC----ATGGGGATTGGTATGAAAAAGG	89	2	del	N/A
1309	TTTATATGTAAGAGAGTTTGTATACAATGAAATAGTATATGTGTAACAGGTTGCTGCTTGGAAAGACAAGGATGGGGATTGGTATGAAACAGG	TTTATATGTAAGAGAGTTTGTATACAATGAAATAGTATATGTGTAACAGGTTGCTGCTTGGAAAGCAAAGGATGGGGATTAGTATGAAACAGG	93	2	Sub	N/A
1310	TTTATATGTAAGAGAGTTTGTATACAATGAAATAGTATATGTGTAACAGGTTGCTGCTTGGAAAGACAAGGATGGGGATTGGTATGAAACAGG	TTTATATGTAAGAGAGTTTGTATACAATGAAATAGTATATGTGTAACCGGTTGCTGCTTGGAAAGATTAGGATGGGGATTGGTATGAAACAGG	93	2	Sub	N/A
1311	TTTATATGTAAGAGAGTTTGTATACAATGAAATAGTATATGTGTAACAGGTTGCTGCTTGGAAAGACAAGGATGGGGATTGGTATGAAACAGG	TTTATATGTAAGAGAGTTTGTATACAATGAAATAGTATATGTGTAACAGGTTGCTGCTTGGAAAGACGAGGATGGGGATTGATATGAAACAGG	93	2	Sub	N/A
1312	TTTATATGTAAGAGAGTTTGTATACAATGAAATAGTATATGTGTAACAGGTTGCTGCTTGGAAAGACAAGGATGGGGATTGGTATGAAACAGG	TTTATATGTAAGAGAGTTTGTATACAATGAAATAGTATATGTGTAACAGGTTTCTGCTTGGAAAGACAAGGATGGGGATTGGTAGGAAACAGG	93	2	Sub	N/A
1313	TTTATATGTAAGAGAGTTTGTATACAATGAAATAGTATATGTGTAACAGGTTGCTGCTTGGAAAGACAAGGATGGGGATTGGTATGAAACAGG	TTTATATGTAAGAGAGTTTGTATACAATGAAATAGTATATGTGTAACAGGTTGCTGCTTGGAAAGGAAAGGATGGGGATTGGTATGAAACAGG	93	2	Sub	N/A
1314	TTTATATGTAAGAGAGTTTGTATACAATGAAATAGTATATGTGTAACAGGTTGCTGCTTGGAAAGACAAGGATGGGGATTGGTATGAAACAGG	TTTATATGTAAGAGAGTTTGTATACAATGAAATAGTATATGTGTAACAGGTTGGTGCTTGGAAAGACAAGGAGGGGGATTGGTATGAAACAGG	93	2	Sub	N/A
1315	TTTATATGTAAGAGAGTTTGTATACAATGAAATAGTATATGTGTAACAGGTTGCTGCTTGGAAAGACAAGGATGGGGATTGGTATGAAACAGG	TTTATATGTAAGAGAGTTTGTATACAATGAAATAGTATATGTGTAATGGGTTGATGCTTGGAAAGACAAGGATGGGGATTGGTATGAAACAGG	93	2	Sub	N/A
1316	TTTATATGTAAGAGAGTTTGTATACAATGAAATAGTATATGTGTAACAGGTTGCTGCTTGGAAAGACAAGGATGGGGATTGGTATGAAACAGG	TTTATATGTAAGAGAGTTTGTATACAATGAAATAGTATATGTGTAACAGGTTGCTGCTGGGAAAGAGAAGGATGGGGATTGGTATGATACAGG	93	2	Sub	N/A
1317	TTTATATGTAAGAGAGTTTGTATACAATGAAATAGTATATGTGTAACAGGTTGCTGCTTGGAAAGACAAGGATGGGGATTGGTATGAAACAGG	TTTATATGTAAGAGAGTTTGTATACAATGAAATAGTATATGTGTAACAGGTTGGTGCTGGGAAAGACAAGGATGGGGATTGGTATGAAACAGG	93	2	Sub	N/A
1318	TTTATATGTA--AGAGAGTTTGTATACAATGAAATAGTATATGTGTAACAGGTTGCTGCTTGGAAAGACAAGGATGGGGATTGGTATGAAACAGG	TATATATGTAAGAGAGAGTTTGTATACAATGAAATAGTATATGTGTAACAGGTTGCTGCTTGGAAAGACAAGGATGGGGATTGGTATGAAACAGG	95	2	Ins	N/A
1319	TTTATATGTAAGAGAGTTTGTATACAATGAAATAGTATATGTGTAACAGGTTGCTGCTTGGAAAGACAAGGATGGGGATTGGTATGAAACAGG	TTTATATGTAAGAGAGTTTGTATACAATGAAATAGTATATGTGTGACAGGTTGCTGCTTGGAAAGAC----ATGGGGATTGGTATGAAACAGG	89	2	del	N/A
1320	TTTATATGTAAGAGAGTTTGTATACAATGAAATAGTATATGTGTAACAGGTTGCTGCTTGGAAAGACAAGGATGGGGATTGGTATGAAACAGG	TTTATATGTAAGAGAGTTTGTATACAATGAAATAGTATATGTGTAACAGGTTGCTGCATGGAAAGACAAGGATGGGGATTGGTATGCAACAGG	93	2	Sub	N/A
1321	TTTATATGTAAGAGAGTTTGTATACAATGAAATAGTATATGTGTAACAGGTTGCTGCTTGGAAAGACAAGGATGGGGATTGGTATGAAACAGG	TTTATATGTAAGAGAGTTTGTATACAATGAAATAGTATATGTGTTATAGGTTGCTTCTTGGAAAGACAA----GGGGATTGGTATGAAACAGG	89	2	del	N/A
1322	TTTAT--------------------------------------------------------------ATGTAAGAGAGTTTGTATACAATGAAATAGTATATGTGTAACAGGTTGCTGCTTGGAAAGACAAGGATGGGGATTGGTATGAAACAGG	TTTATATGTAAGAGAGTTTGTATACAATGAAATAGTATATGAACTCTCTTACATATAAACTAATTTAATGTAAGAGAGTTTGTATACAATGAAATAGTATATGTGTAACAGGTTGCTGCTTGGAAAGACAAGGATGGGGATTGGTATGAAACAGG	155	2	Ins	N/A
1323	TTTATATGTAAGAGAGTTTGTATACAATGAAATAGTATATGTGTAACAGGTTGCTGCTTGGAAAGACAAGGATGGGGATTGGTATGAAACAGG	TTTATATGTAAGAGAGTTTGTATACAATGAACTAGTATATGTGTAACAGGTTGCTGCTTGGAAAGACCAGGATGGGGATTGGTATGAAACAGG	93	2	Sub	N/A
1324	TTTATATGTAAGAGAGTTTGTATACAATGAAATAGTATATGTGTAACAGGTTGCTGCTTGGAAAGACAAGGATGGGGATTGGTATGAAACAGG	TTGATATGTAAGAGAGTTTGTATACAATGAAATAGTATATGTGTAACAGGTTGCTGCTTGGAAAGACAAGGAGGGGGATTGGTATGAAACAGG	93	2	Sub	N/A
1325	TTTATATGTAAGAGAGTTTGTATACAATGAAATAGTATATGTGTAACAGGTTGCTGCTTGGAAAGACAAGGATGGGGATTGGTATGAAACAGG	TTTATATGTAAGAGAGTTTGTATACAATGAAATAGTATATGTGTAACTGGTTGCTGCTTGGAGAGACAAGGATGGGGATTGGTATGAAACAGG	93	2	Sub	N/A
1326	TTTATATGTAAGAGAGTTTGTATACAATGAAATAGTATATGTGTAACAGGTTGCTGCTTGGAAAGACAAGGATGGGGATTGGTATGAAACAGG	TTTATATGTAAGAGCGTTTGTATACAATGAAATAGTATATGTGTAACAGGTTGGTGCTTGGAAAGACAAGGATGGGGATTGGTATGAAACAGG	93	2	Sub	N/A
1327	TTTATATGTAAGAGAGTTTGTATACAATGAAATAGTATATGTGTAACAGGTTGCTGCTTGGAAAGACAAGGATGGGGATTGGTATGAAACAGG	TTTAGATGTAAGAGAGTTTGTATACAATGAAATAGTATATGTGTAACAGGTTGCTGCTTGGAAAGACACGGATGGGGATTGGTATGAAACAGG	93	2	Sub	N/A
1328	TTTATATGTAAGAGAGTTTGTATACAATGAAATAGTATATGTGTAACAGGTTGCTGCTTGGAAAGACAAGGATGGGGATTGGTATGAAACAGG	TTTATATGTAAGAGAGTTTGTATACAATGAAATAGTGTATGTGTAACGGGTTGCTGCTTGGAAAGAAAAGGATGGGGATTGGTATGAAACAGG	93	2	Sub	N/A
1329	TTTATATGTAAGAGAGTTTGTATACAATGAAATAGTATATGTGTAACAGGTTGCTGCTTGGAAAGACAAGGATGGGGATTGGTATGAAACAGG	TTTATATGTAAGAGAGTTTGTATACAATGAAATAGTATATGTGTAACAGGTTGCTGCTTGGAAAGAGATGGATGGGGATTAGTATGAAACAGG	93	2	Sub	N/A
1330	TTTATATGTAAGAGAGTTTGTATACAATGAAATAGTATATGTGTAACAGGTTGCTGCTTGGAAAGACAAGGATGGGGATTGGTATGAAACAGG	TTTATATGTAAGAGAGTTTGTATACAATGAAATAGTATATGTGTAACAGGTTGCTGCTAGGAAAGACAAGGATTGGGATTGGTATGAAACAGG	93	2	Sub	N/A
1331	TTTATATGTAAGAGAGTTTGTATACAATGAAATAGTATATGTGTAACAGGTTGCTGCTTGGAAAGACAAGGATGGGGATTGGTATGAAACAGG	TTTATATGTAAGAAAGTTTGTATACAATGAAATAGTGTATGTGTAACAGGTTGCTGCTTGGAAAGACAAGGATGGGGATTGGTATGAAACAGG	93	2	Sub	N/A
1332	TTTATATGTAAGAGAGTTTGTATACAATGAAATAGTATATGTGTAACAGGTTGCTGCTTGGAAAGACAAGGATGGGGATTGGTATGAAACAGG	TTTATATGTAAGAGAGTTTGTATACGATGAAATAGTATATGTGTAACGGGTTGCTGCTTGGAAAGACAAGGATGGGGATTGGTATGAAACAGG	93	2	Sub	N/A
1333	TTTATATGTAAGAGAGTTTGTATACAATGAAATAGTATATGTGTAACAGGTTGCTGCTTGGAAAGACAAGGATGGGGATTGGTATGAAACAGG	TTTATATGTAAGAGAGTTTGTATATAATGAAACAGTGTATGTGTAACAGGTTGCTGCTTGGAAAGACAA----GGGGATTGGTATGAAACAGG	89	2	del	N/A
1334	TTTATATGTAAGAGAGTTTGTATACAATGAAATAGTATATGTGTAACAGGTTGCTGCTTGGAAAGACAAGGATGGGGATTGGTATGAAACAGG	TTTATATGTAAGAGGGGTTGTATACAATGAAATAGTATATGTGTAACAGGTTGCTGCTTGGAAAGACAAGGATGGGGATTGGTATGAAACAGG	93	2	Sub	N/A
1335	TTTATATGTAAGAGAGTTTGTATACAATGAAATAGTATATGTGTAACAGGTTGCTGCTTGGAAAGACAAGGATGGGGATTGGTATGAAACAGG	TTTATATGTAAGAGAGTTTGTATACAATGAAATAGTATATGTGTAATCGGTTGCTGCTTGGAAAGAGAAGGATGGGGATTGGTATGAAACAGG	93	2	Sub	N/A
1336	TTTATATGTAAGAGAGTTTGTATACAATGAAATAGTATATGTGTAACAGGTTGCTGCTTGGAAAGACAAGGATGGGGATTGGTATGAAACAGG	TTTATATGTAAGAGAGTTTGTATATAATGAAACAGTATATGTGTAACAGGTTGCTGCTTGGAAAGAC----ATGGGGATTGGTATGAAACAGG	89	2	del	N/A
1337	TTTATATGTAAGAGAGTTTGTATACAATGAAATAGTATATGTGTAACAGGTTGCTGCTTGGAAAGACAAGGATGGGGATTGGTATGAAACAGG	TTTATATGTAAGAGAGTTTGTATACAATGAAATAGTATATGTGTAACAGGTTGCTGCATGGAAAGATAAGGATGGGGATTCGTATGAAACAGG	93	2	Sub	N/A
1338	TTTATATGTAAGAGAGTTTGTATACAATGAAATAGTATATGTGTAACAGGTTGCTGCTTGGAAAGACA-AGGATGGGGATTGGTATGAAACAGG	TTTATATGTAAGAGAGTTTGTATACAATGAAATAGTATATGTGTAACAGGTTGCTGCTTGGAAAG-CACAGGATGGGGATTAGTATGAAACAGG	93	2	Sub	N/A
1339	TTTATATGTAAGAGAGTTTGTATACAATGAAATAGTATATGTGTAACAGGTTGCTGCTTGGAAAGACAAGGATGGGGATTGGTATGAAACAGG	TTTATATGTAAGAGAGGTTGTATACAATGAAATAGTATATGTGTAACAGGTTGGTGCTTGGAAAGACAAGGATGGGGATTGGTATGAAACAGG	93	2	Sub	N/A
1340	TTTATATGTAAGAGAGTTTGTATACAATGAAATAGTATATGTGTAACAGGTTGCTGCTTGGAAAGACAAGGATGGGGATTGGTATGAAACAGG	TTTATATGTAAGAGAGTTTGTATACAATGAAATAGTATATGTGTAAGAGGTTGCTGCTTGGAACGACAAGGATGGGGATTGGTATGAAACAGG	93	2	Sub	N/A
1341	TTTATATGTAAGAGAGTTTGTATACAATGAAATAGTATATGTGTAACAGGTTGCTGCTTGGAAAGACAAGGATGGGGATTGGTATGAAACAGG	TTTATATGTAAGAGAGTTTGTATACAATGAAAAAGTATATGTGAAACAGGTTGCTGCTTGGAAAGACAAGGATGGGGATTGGTATGAAACAGG	93	2	Sub	N/A
1342	TTTATATGTAAGAGAGTTTGTATACAATGAAATAGTATATGTGTAACAGGTTGCTGCTTGGAAAGACAAGGATGGGGATTGGTATGAAACAGG	TTTATATGTAAGAGAGTTTGTATACAATGAAATAGTATATGTGTAACCGGTTGATGCTTGGAAAGACAAGGATGGGGATTGCTATGAAACAGG	93	2	Sub	N/A
1343	TTTATATGTAAGAGAGTTTGTATACAATGAAATAGTATATGTGTAACAGGTTGCTGCTTGGAAAGACAAGGATGGGGATTGGTATGAAACAGG	TTTATATGTAAGAGAGTTTGTATACAATGAAATAGTATATGTGTAGCGGGTTGCTGCTTGGAAAGACAAGGATGGGGATTGGTATGAAACAGG	93	2	Sub	N/A
1344	TTTATATGTAAGAGAGTTTGTATACAATGAAATAGTATATGTGTAACAGGTTGCTGCTTGGAAAGACAAGGATGGGGATTGGTATGAAACAGG	TTTATATGTAAGAGAGTTTGTATATAATGAAACAGTGTATGTGTAACAGGATGCTGCTTGGAAAGAC----ATGGGGATTGGTATGAAACAGG	89	2	del	N/A
1345	TTTATATGTAAGAGAGTTTGTATACAATGAAATAGTATATGTGTAACAGGTTGCTGCTTGGAAAGACAAGGATGGGGATTGGTATGAAACAGG	TTTATATGTAAGAGAGTTTGTATACAATGAAATAGTATATGTGTAACAGGGTGATGCTGGGAAAGACAAGGATGGGGATTGGTATGAAACAGG	93	2	Sub	N/A
1346	TTTATATGTAAGAGAGTTTGTATACAATGAAATAGTATATGTGTAACAGGTTGCTGCTTGGAAAGACAAGGATGGGGATTGGTATGAAACAGG	TTTATATGTAAGAGAGTTTGTATACAATGAAATAGTATATGCGTAACAGGTTGCTGCTTGGAAAGACACGGATGGGGATTGGTATGAAACAGG	93	2	Sub	N/A
1347	TTTATATGTAAGAGAGTTTGTATACAATGAAATAGTATATGTGTAACAGGTTGCTGCTTGGAAAGACAAGGATGGGGATTGGTATGAAACAGG	TTTATATGTAAGAGAGTTTGTATACAATGAAATAGTATATGTGTAACTGGTTGCTGCTAGGAAAGACAAGGATGGGGTTTGGTATGAAACAGG	93	2	Sub	N/A
1348	TTTATATGTAAGAGAGTTTGTATACAATGAAATAGTATATGTGTAACAGGTTGCTGCTTGGAAAGACAAGGATGGGGATTGGTATGAAACAGG	TTTATATGTAAGAGAGTTTGTATACAATGAAATAGTATATGTGTAATAGGTTGCTGCTTGGAAAGACATGGATGGGGATTGGTATGAAACAGT	93	2	Sub	N/A
1349	TTTATATGTAAGAGAGTTTGTATACAATGAAATAGTATATGTGTAACAGGTTGCTGCTTGGAAAGACAAGGATGGGGATTGGTATGAAACAGG	TTTATATGTAAGAGAGTTTGTATACAATGAAATAGTATATGTGTAACAGGTTGCTGCTGGGAGAGACAAGGATGGGGATTGGTATGAAACAGG	93	2	Sub	N/A
1350	TTTATATGTAAGAGAGTTTGTATACAATGAAATAGTATATGTGTAACAGGTTGCTGCTTGGAAAGACAAGGATGGGGATTGGTATGAAACAGG	TTTATATGTAAGAGAGTTTGTATACAATGAAATAGTATATGTGTAACAGGTTGCTGCTTGGAAAGAAAAGGATGGGGTTTGGTATGAAACAGG	93	2	Sub	N/A
1351	TTTATATGTAAGAGAGTTTGTATACAATGAAATAGTATATGTGTAACAGGTTGCTGCTTGGAAAGACAAGGATGGGGATTGGTATGAAACAGG	TTTATATGTAAGAGAGTTTGTATACAATGAAATAGTATATGTGTAATAGGTTGCTGCTTGGAAAGACATAGATGGGGATTGGTATGAAACAGG	93	2	Sub	N/A
1352	TTTATATGTAAGAGAGTTTGTATACAATGAAATAGTATATGTGTAACAGGTTGCTGCTTGGAAAGACAAGGATGGGGATTGGTATGAAACAGG	TTTATATGTACGAGAGTTTGTATACAATGAAATAGTATATGTGTAACAGGTTGCTGCTTGGAAAGACAAGGATGGGGTTTGGTATGAAACAGG	93	2	Sub	N/A
1353	TTTATATGTAAGAGAGTTTGTATACAATGAAATAGTATATGTGTAACAGGTTGCTGCTTGGAAAGACAAGGATGGGGATTGGTATGAAACAGG	TTTATATGTAAGAGAGTTTGTATACAATGAAATAGTATATGTGTAATAGGTTGCTGCTTGGAAAGACAAG---GGGGATTGGTATGAAACAGG	90	2	del	N/A
1354	TTTATATGTAAGAGAGTTTGTATACAATGAAATAGTATATGTGTAACAGGTTGCTGCTTGGAAAGACAAGGATGGGGATTGGTATGAAACAGG	TTTATATGTAAGAGAGTTTGTATACAATGAAATAGTATATGTGTAACAGGTTGCTGCTTGGAAAGAGAAGGATGGGGATGGGTATGAAACAGG	93	2	Sub	N/A
1355	TTTATATGTAAGAGAGTTTGTATACAATGAAATAGTATATGTGTAACAGGTTGCTGCTTGGAAAGACAAGGATGGGGATTGGTATGAAACAGG	TTTATATATAAGAGAGTTTGTATACAATGAAATAGTCTATGTGTAACAGGTTGCTGCTTGGAAAGACAAGGATGGGGATTGGTATGAAACAGG	93	2	Sub	N/A
1356	TTTATATGTAAGAGAGTTTGTATACAATGAAATAGTATATGTGTAACAGGTTGCTGCTTGGAAAGACAAGGATGGGGATTGGTATGAAACAGG	TTTATATGTAAGAGAGTTTGTATACAATGAAATAGTATATGTGTAACAGGTTGCTGCTTGGAAAGACAAGGATGGGGCTTGTTATGAAACAGG	93	2	Sub	N/A
1357	TTTATATGTAAGAGAGTTTGTATACAATGAAATAGTATATGTGTAACAGGTTGCTGCTTGGAAAGACAAGGATGGGGATTGGTATGAAACAGG	TTTATATGTAAGAGAGTTTGTATACAATGAAATAGTATATGTGTAACAGGTTGCTGATTGGAAAGACAAGGATGGGGATTCGTATGAAACAGG	93	2	Sub	N/A
1358	TTTATATGTAAGAGAGTTTGTATACAATGAAATAGTATATGTGTAACAGGTTGCTGCTTGGAAAGACAAGGATGGGGATTGGTATGAAACAGG	TTTATATGTAAGAGAGTTTGTATACAATGAAATAGTATATGTGTAACAGGTTGCTGCTTGGAAAGAAAAGGATGGGGATTGGTATGGAACAGG	93	2	Sub	N/A
1359	TTTATATGTAAGAGAGTTTGTATACAATGAAATAGTATATGTGTAACAGGTTGCTGCTTGGAAAGACAAGGATGGGGATTGGTATGAAACAGG	TCTATATGTAAGAGAGTTTGTATACAATGAAATAGTGTAAGTGTAACAGGTTGTTGCTTGAAAAGACAAGGATGGGGATTGGTATGAAACAGG	93	2	Sub	N/A
1360	TTTATATGTAAGAGAGTTTGTATACAATGAAATAGTATATGTGTAACAGGTTGCTGCTTGGAAAGACAAGGATGGGGATTGGTATGAAACAGG	TTTATATGTAAGAGAGTTTGTATACAATGAAATAGTATATGTGTAACAGGTTGATGCATGGAAAGACAAGGATGGGGATTCGTATGAAACAGG	93	2	Sub	N/A
1361	TTTATATGTAAGAGAGTTTGTATACAATGAAATAGTATATGTGTAACAGGTTGCTGCTTGGAAAGACAAGGATGGGGATTGGTATGAAACAGG	TTTATATGTAAGAGAGTTTGTATAAAATGAAATAGTGTATGTGTAACGGGTTGCTGCTTGGAAAGACAAGGATGGGGATTGGTATGAAACAGG	93	2	Sub	N/A
1362	TTTATATGTAAGAGAGTTTGTATACAATGAAATAGTATATGTGTAACAGGTTGCTGCTTGGAAAGACAAGGATGGGGATTGGTATGAAACAGG	TTTATATGTAAGAGAGTTTGTATACAATGAAATAGTATATGTGTAACAGGGTGGTGCTTGGAAAGACAAGGATGGGGATTGGTATGAAACAGG	93	2	Sub	N/A
1363	TTTATATGTAAGAGAGTTTGTATACAATGAAATAGTATATGTGTAACAGGTTGCTGCTTGGAAAGACAAGGATGGGGATTGGTATGAAACAGG	TTTATATGTAATAGAGTTTGTATACAATGAAATAGTATATGTGTAACGGGTTGCTGCTTGGAAAGACAAGGATGGGGATTGGTATGAAACAGG	93	2	Sub	N/A
1364	TTTATATGTAAGAGAGTTTGTATACAATGAAATAGTATATGTGTAACAGGTTGCTGCTTGGAAAGACAAGGATGGGGATTGGTATGAAACAGG	TTTATATGTAAGAGAGTTTGTATACAATGAAATAGTATATGTGTAAGAGGTTGCTGCTTGGAAAGACAAGGATGGGGATTGGTATGAAACAGA	93	2	Sub	N/A
1365	TTTATATGTAAGAGAGTTTGTATACAATGAAATAGTATATGTGTAACAGGTTGCTGCTTGGAAAGACAAGGATGGGGATTGGTATGAAACAGG	TTTATATGTAAGAGAGTTTGTATACAATGAAATAGTATATGTGTAACAGGTGGCTGCTTGGAAAGATAAGGATGGGGATTGGTATGAAACAGG	93	2	Sub	N/A
1366	TTTATATGTAAGAGAGTTTGTATACAATGAAATAGTATATGTGTAACAGGTTGCTGCTTGGAAAGACAAGGATGGGGATTGGTATGAAACAGG	TTTATATGTAAGAGAGTTTGTATACAATGAAATAGTATATGTGTAACAGGTTGCTGCTTGGAAAGACAAGGATGGGTATTAGTATGAAACAGG	93	2	Sub	N/A
1367	TTTATATGTAAGAGAGTTTGTATACAATGAAATAGTATATGTGTAACAGGTTGCTGCTTGGAAAGACAAGGATGGGGATTGGTATGAAACAGG	TTTATATGTAAGAGAGTTTGTATACAATGAAATAGTATATGTGTAATAGGTTGCTGCTTGGAAAGACATGGATGGGGTTTGGTATGAAACAGG	93	2	Sub	N/A
1368	TTTATATGTAAGAGAGTTTGTATACAATGAAATAGTATATGTGTAACAGGTTGCTGCTTGGAAAGACAAGGATGGGGATTGGTATGAAACAGG	TTTATATGTAAGAGAGTTTGTATACAATGAAATAGCATATGTGTAACAGGTTGCTGCTTGGAAAGACAAGGATGGGGATTGGTATGAAACAGA	93	2	Sub	N/A
1369	TTTATATGTAAGAGAGTTTGTATACAATGAAATAGTATATGTGTAACAGGTTGCTGCTTGGAAAGACAAGGATGGGGATTGGTATGAAACAGG	TTTGTATGTAAGAGAGTTTGTATACAATGAAATAGTATATGTGTAACAGGTTGGTGCTTGGAAAGACAAGGATGGGGATTGGTATGAAACAGG	93	2	Sub	N/A
1370	TTTATATGTAAGAGAGTTTGTATACAATGAAATAGTATATGTGTAACAGGTTGCTGCTTGGAAAGACAAGGATGGGGATTGGTATGAAACAGG	TCTATATGTAAGAGAGTTTGTATACAATGAAATAGTATATGTGTAACAGGTTGCTGCTTGGAAAGACAAGCATGGGGATTGGTATGAAACAGG	93	2	Sub	N/A
1371	TTTATATGTAAGAGAGTTTGTATACAATGAAATAGTATATGTGTAACAGGTTGCTGCTTGGAAAGACAAGGATGGGGATTGGTATGAAACAGG	TTTATATGTAAGAGAGTTTGTATACAATGAAATAGTATATGTGTAACAGGTTGCTGGTGGGAAAGACAAGGATGGGGATTGGTATGAAACAGG	93	2	Sub	N/A
1372	TTTATATGTAAGAGAGTTTGTATACAATGAAATAGTATATGTGTAACAGGTTGCTGCTTGGAAAGACAAGGATGGGGATTGGTATGAAACAGG	TTTATATGTAAGAGAGTTTGTATACAATGAAATAGTATATGTGTAACAGGTTGCTGCTCGGAAGGACAAGGATGGGGATTGGTATGAAACAGG	93	2	Sub	N/A
1373	TTTATATGTAAGAGAGTTTGTATACAATGAAATAGTATATGTGTAACAGGTTGCTGCTTGGAAAGACAAGGATGGGGATTGGTATGAAACAGG	TTTATATGTAAGAGAGTTTGTATACAATGAAATAGTATATGTGTAACAGGTTGCTGCTTGGAAAGAAAAGGATGGGGATTGGAATGAAACAGG	93	2	Sub	N/A
1374	TTTATATGTAAGAGAGTTTGTATACAATGAAATAGTATATGTGTAACAGGTTGCTGCTTGGAAAGACAAGGATGGGGATTGGTATGAAACAGG	TTTATATGTAAGAGAGTTTGTATACAATGAAATAGTATATGTGTAATAGGTTGCTCCTTGGAAAGACAAGGATGGGGATTGGTATGAAACAGG	93	2	Sub	N/A
1375	TTTATATGTAAGAGAGTTTGTATACAATGAAATAGTATATGTGTAACAGGTTGCTGCTTGGAAAGACAAGGATGGGGATTGGTATGAAACAGG	TTTATATGTAAGAGAGTTTGTATAC-ATGAAATAGTATATGTGTAATAGGTTGCTGCTTGGAAAGACAAGGATGGGGATTGGTATGAAACAGG	92	2	del	N/A
1376	TTTATATGTAAGAGAGTTTGTATACAATGAAATAGTATATGTGTAACAGGTTGCTGCTTGGAAAGACAAGGATGGGGATTGGTATGAAACAGG	TTTATATGTAAGAGAGTTTGTATACAATGAAATAGTATATGTGTAACAGGGTGCTGCTAGGAAAGACAAGGATGGGGATTGGTATGAAACAGG	93	2	Sub	N/A
1377	TTTATATGTAAGAGAGTTTGTATACAATGAAATAGTATATGTGTAACAGGTTGCTGCTTGGAAAGACAAGGATGGGGATTGGTATGAAACAGG	TTTATATGTAAGAGAGTTTGTATATAATGGAATAGTGTATGTGTAACGGGTTGCTGCTTGGAAAGACTAGGATGGGGATTGGTATGAAACAGG	93	2	Sub	N/A
1378	TTTATATGTAAGAGAGTTTGTATACAATGAAATAGTATATGTGTAACAGGTTGCTGCTTGGAAAGACAAGGATGGGGATTGGTATGAAACAGG	TTTATATGTAAGAGAGTTTGTATACAATGAAATAGTATATGTGTAACAGGTTGCTACTTGGAAAGACAAGGATGGGGATTGATATGAAACAGG	93	2	Sub	N/A
1379	TTTATATGTAAGAGAGTTTGTATACAATGAAATAGTATATGTGTAACAGGTTGCTGCTTGGAAAGACAAGGATGGGGATTGGTATGAAACAGG	TTTATATGTAAGAGAGTTTGTATACAATGAAATAGTATATGTGTAACAGGTTGCTGCTTGGAAAGACCAGGATGGGGATGGGTATGAAACAGG	93	2	Sub	N/A
1380	TTTATATGTAAGAGAGTTTGTATACAATGAAATAGTATATGTGTAACAGGTTGCTGCTTGGAAAGACAAGGATGGGGATTGGTATGAAACAGG	TTTATATGTAAGAGAGTTTGTATACAATGAAATAGTATATGTGTAATAGGTTGCTGCTTGGAAAGAAACGGATGGGGATTGGTATGAAACAGG	93	2	Sub	N/A
1381	TTTATATGTAAGAGAGTTTGTATACAATGAAATAGTATATGTGTAACAGGTTGCTGCTTGGAAAGACAAGGATGGGGATTGGTATGAAACAGG	TTTATATGTAAGAGAGTTTGTATACAATGAAACGGTGTATGTGTAACAGGTTGCTGCTTGGAAAGAC----ATGGGGATTGGTATGAAACAGG	89	2	del	N/A
1382	TTTATATGTAAGAGAGTTTGTATACAATGAAATAGTATATGTGTAACAGGTTGCTGCTTGGAAAGACAAGGATGGGGATTGGTATGAAACAGG	TTTATATGTAAGAGAGTTTGTATACAATGAAATAGTATATGTGTAACAGGTTGCTGCTTGGAACGACGAGGATGGGGATTGGTATGAAACAGG	93	2	Sub	N/A
1383	TTTATATGTAAGAGAGTTTGTATACAATGAAATAGTATATGTGTAACAGGTTGCTGCTTGGAAAGACAAGGATGGGGATTGGTATGAAACAGG	TTTATATGTAAGAGAGTTTGTATACAATGAAATAGTATATGTGTAACAGGTTGCTGCATGGAAAGACAAGGATGGGGATTGGTATGACACAGG	93	2	Sub	N/A
1384	TTTATATGTAAGAGAGTTTGTATACAATGAAATAGTATATGTGTAACAGGTTGCTGCTTGGAAAGACAAGGATGGGGATTGGTATGAAACAGG	TTTATATGTAAGAGAGTTTGTATACAATGAAATAGTATATGTGTAACAGGTTGCTGCTTGGAAAGACAAGGAGGGGGATTGATATGAAACAGG	93	2	Sub	N/A
1385	TTTATATGTAAGAGAGTTTGTATACAATGAAATAGTATATGTGTAACAGGTTGCTGCTTGGAAAGACAAGGATGGGGATTGGTATGAAACAGG	TTTATATTTAAGAGAGTTTGTATACAATGAAATAGTATATGTGTAAAAGGTTGCTGCTTGGAAAGACAAGGATGGGGATTGGTATGAAACAGG	93	2	Sub	N/A
1386	TTTATATGTAAGAGAGTTTGTATACAATGAAATAGTATATGTGTAACAGGTTGCTGCTTGGAAAGACAAGGATGGGGATTGGTATGAAACAGG	TTTATATGTAAGAGAGTTTGTATATAATGAAACAGTGTATGTGTAACAGGTTGCTGCTTGGAAAGAC----ATGGGGATTGGAATGAAACAGG	89	2	del	N/A
1387	TTTATATGTAAGAGAGTTTGTATACAATGAAATAGTATATGTGTAACAGGTTGCTGCTTGGAAAGACAAGGATGGGGATTGGTATGAAACAGG	TTTATATGTAAGAGAGTTTGTATACAATGAAATAGTATATGTGTAAAAGGTTGCTGCTTGGAAAGACAAGGATGGGGAGTGGTATGAAACAGG	93	2	Sub	N/A
1388	TTTATATGTAAGAGAGTTTGTATACAATGAAATAGTATATGTGTAACAGGTTGCTGCTTGGAAAGACAAGGATGGGGATTGGTATGAAACAGG	TTTATATGTAAGAGAGTTTGTATACAATGAAACAGTGTATGTGTAACAGGGTGCTGCTTGGAAAGAC----ATGGGGATTGGTATGAAACAGG	89	2	del	N/A
1389	TTTATATGTAAGAGAGTTTGTATACAATGAAATAGTATATGTGTAACAGGTTGCTGCTTGGAAAGACAAGGATGGGGATTGGTATGAAACAGG	TTTATATGTAAGAGAGTTTGTATACAATGAAATAGTATATGTGTAACAGGTTGCTGATTGGAAAGAAAAGGATGGGGATTGGTATGAAACAGG	93	2	Sub	N/A
1390	TTTATATGTAAGAGAGTTTGTATACAATGAAATAGTATATGTGTAACAGGTTGCTGCTTGGAAAGACAAGGATGGGGATTGGTATGAAACAGG	TTTATATGTAAGAGAGTTTGTATACAATGAAATAGTATATGTGTAATAGGTTGCTGCTTGGAAAGAAAGGGATGGGGATTGGTATGAAACAGG	93	2	Sub	N/A
1391	TTTATATGTAAGAGAGTTTGTATACAATGAAATAGTATATGTGTAACAGGTTGCTGCTTGGAAAGACAAGGATGGGGATTGGTATGAAACAGG	TTTATATGTAAGAGAGTTTGTATACAATGAAATAGTATATGTGTAACAGGTTGCTGCTTGGAAAGACCAGGACGGGGATTGGTATGAAACAGG	93	2	Sub	N/A
1392	TTTATATGTAAGAGAGTTTGTATACAATGAAATAGTATATGTGTAACAGGTTGCTGCTTGGAAAGACAAGGATGGGGATTGGTATGAAACAGG	TTTATATGTAAGAGAGTTTGTATACAATGAAATAGTATATGTGTAACAGGTTGCTGTTTGGAAAGACGAGGATGGGGATTGGTATGAAACAGA	93	2	Sub	N/A
1393	TTTATATGTAAGAGAGTTTGTATACAATGAAATAGTATATGTGTAACAGGTTGCTGCTTGGAAAGACAAGGATGGGGATTGGTATGAAACAGG	TTTATATGTAAGAGAGTTTGTATACAATGAAATAGTATATGTGTAACAGGTTGCTGTTTGGAAAGAGAAGGATGGGGATTGGTATGAAACAGG	93	2	Sub	N/A
1394	TTTATATGTAAGAGAGTTTGTATACAATGAAATAGTATATGTGTAACAGGTTGCTGCTTGGAAAGACAAGGATGGGGATTGGTATGAAACAGG	TTTATATGTAAGAGAGTTTGTATACAATGAAATAGTATATGTGTAACAGGTTGCTGCTTGGAAAGATTAGGATGGGGATTGGTATGAAACACG	93	2	Sub	N/A
1395	TTTATATGTAAGAGAGTTTGTATACAATGAAATAGTATATGTGTAACAGGTTGCTGCTTGGAAAGACAAGGATGGGGATTGGTATGAAACAGG	TTTATATGTAAGAGAGTTTGTATACAATGAAATAGTATATGTGTAACAGGTTGCTGATTGGAAAGACAAGGATGGGGATTGGTATGAAAAAGG	93	2	Sub	N/A
1396	TTTATATGTAAGAGAGTTTGTATACAATGAAATAGTATATGTGTAACAGGTTGCTGCTTGGAAAGACAAGGATGGGGATTGGTATGAAACAGG	TTTATATGTAAGAGAGTTTGTATACAATGAAATAGTATATGTGTAACAGGTTGCAGCTTGGAAAGAAAAGGATGGGGATTGGTATGAAACAGG	93	2	Sub	N/A
1397	TTTATATGTAAGAGAGTTTGTATACAATGAAATAGTATATGTGTAACAGGTTGCTGCTTGGAAAGACAAGGATGGGGATTGGTATGAAACAGG	TTTATATGTAAGAGAGTTTGTATACAATGAAATAGTATATGTGTAACAGGTTCCTGCTTGGAAAGACAAGGATGGGGATTGGTATGAAACAGC	93	2	Sub	N/A
1398	TTTATATGTAAGAGAGTTTGTATACAATGAAATAGTATATGTGTAACAGGTTGCTGCTTGGAAAGACAAGGATGGGGATTGGTATGAAACAGG	TTTATATGTAAGAGAGTTTGTATACAATGAAATAGTATATGTGTAACAGGTTGATGCTTGGAAAGACGAGGATGGGGATTTGTATGAAACAGG	93	2	Sub	N/A
1399	TTTATATGTAAGAGAGTTTGTATACAATGAAATAGTATATGTGTAACAGGTTGCTGCTTGGAAAGACAAGGATGGGGATTGGTATGAAACAGG	TTTATATGAAAGAGAGTTTGTATACAATGAAATAGTATATGTGTAATATGTTGCTGCTTGGAAAGACAAGGATGGGGATTGGTATGAAACAGG	93	2	Sub	N/A
1400	TTTATATGTAAGAGAGTTTGTATACAATGAAATAGTATATGTGTAACAGGTTGCTGCTTGGAAAGACAAGGATGGGGATTGGTATGAAACAGG	TTTATATGTAAGAGAGTTTGTATACAATGAAATAGTATATGTGTAACAGGTGGCGGCTTGGAAAGACAAGGATGGGGATTGGTATGAAACATG	93	2	Sub	N/A
1401	TTTATATGTAAGAGAGTTTGTATACAATGAAATAGTATATGTGTAACAGGTTGCTGCTTGGAAAGACAAGGATGGGGATTGGTATGAAACAGG	TTTATATGTAAGAGAGTTTGTATACAATGAAATAGTATATGTGTAACCGGTTGCTGCTTGGAAAGACAAGGATGGGGATGGGTATGAAACAGG	93	2	Sub	N/A
1402	TTTATATGTAAGAGAGTTTGTATACAATGAAATAGTATATGTGTAACAGGTTGCTGCTTGGAAAGACAAGGATGGGGATTGGTATGAAACAGG	TTTATATGTAAGAGAGTTTGTATACAATGAAATAGTATATGTGTAATAGGTTGCTGCTTGGAAAGATAATGATGGGGATTGGTATGAAACAGG	93	2	Sub	N/A
1403	TTTATATGTAAGAGAGTTTGTATACAATGAAATAGTATATGTGTAACAGGTTGCTGCTTGGAAAGACAAGGATGGGGATTGGTATGAAACAGG	TTTATATGTAAGAGAGTTTGTATACAATGAAATAGTATATGTGTAACGGGTTGCTGCTTGGAAAGAACAGGATGGGGATTGGTATGAAACAGG	93	2	Sub	N/A
1404	TTTATATGTAAGAGAGTTTGTATACAATGAAATAGTATATGTGTAACAGGTTGCTGCTTGGAAAGACAAGGATGGGGATTGGTATGAAACAGG	TTTATATGTAAGAGGGTTTGTATACAATGAAATAGTATATGTGTAACAGGTTGCTGCTTGGAAAGAC----ATGGGGATTGGTATGAAACAGG	89	2	del	N/A
1405	TTTATATGTAAGAGAGTTTGTATACAATGAAATAGTATATGTGTAACAGGTTGCTGCTTGGAAAGACAAGGATGGGGATTGGTATGAAACAGG	TTTATATGTAAGAGAGTTTGTATACAATGAAATAGTATATGTGTAACAGGTTGCTGCTTGGAAAGACATGGATGGGGGTTGGTATGAAACAGG	93	2	Sub	N/A
1406	TTTATATGTAAGAGAGTTTGTATACAATGAAATAGTATATGTGTAACAGGTTGCTGCTTGGAAAGACAAGGATGGGGATTGGTATGAAACAGG	TTTATATGTAAGAGAGTTTGTATACAATGAAATAGTATATGTGTAATAGGTTGCTGCTTGGAAAGACGAGGAGGGGGATTGGTATGAAACAGG	93	2	Sub	N/A
1407	#NAME?	TTTATATGTAAGAGAGTTTGTATACAATGAAATAGTATATGTGTAACAGGTTGCACATAATATATTTTTATATTCGATCATAAATTAGTTTATATGTAAGAGAGTTTGTATACAATGAAATAGTATATGTGTAACAGGTTGCTGCTTGGAAAGACAAGGATGGGGATTGGTATGAAACAGG	181	2	Ins	N/A
1408	TTTATATGTAAGAGAGTTTGTATACAATGAAATAGTATATGTGTAACAGGTTGCTGCTTGGAAAGACAAGGATGGGGATTGGTATGAAACAGG	TTGATATGTAAGAGAGTTTGTATACAATGAAATAGTATATGTGTAATAGGTTGCTGCTTGGAAAGACAAGGATGGGGATTGGTATGAAACAGG	93	2	Sub	N/A
1409	TTTATATGTAAGAGAGTTTGTATACAATGAAATAGTATATGTGTAACAGGTTGCTGCTTGGAAAGACAAGGATGGGGATTGGTATGAAACAGG	TTTATATGTAACAGAGTTTGTATACAATGGAATAGTATATGTGTAACGGGTTGCTGCTTGGAAAGACAAGGATGGGGATTGGTATGAAACAGG	93	2	Sub	N/A
1410	TTTATATGTAAGAGAGTTTGTATACAATGAAATAGTATATGTGTAACAGGTTGCTGCTTGGAAAGACAAGGATGGGGATTGGTATGAAACAGG	TTTATATGTAAGAGGGTTTGTATACAATGAAATAGTATATGTGTAATAGGTTGCTGCTTGGAAAGACAAGGATGGGGATTGGTATGGAACAGG	93	2	Sub	N/A
1411	TTTATATGTAAGAGAGTTTGTATACAATGAAATAGTATATGTGTAACAGGTTGCTGCTTGGAAAGACAAGGATGGGGATTGGTATGAAACAGG	TTTATATGTAAGAGAGTTTGTATACAATGAAATAGTATATGTGTAACAGGTTGGTGATTGGAAAGACAAGGATGGGGATTGGTATGAAACAGG	93	2	Sub	N/A
1412	TTTATATGTAAGAGAGTTTGTATACAATGAAATAGTATATGTGTAACAGGTTGCTGCTTGGAAAGACAAGGATGGGGATTGGTATGAAACAGG	TTTATATGTAAGAGAGTTTGTATACAATGAAATAGTATATGTGTAACAGGTTGATGCTTGGAAAGACAAGGATGGGGATTGGCATGAAACAGG	93	2	Sub	N/A
1413	TTTATATGTAAGAGAGTTTGTATACAATGAAATAGTATATGTGTAACAGGTTGCTGCTTGGAAAGACAAGGATGGGGATTGGTATGAAACAGG	TTTATATGTAAGAGAGTTTGTATACAAAGAAATAGTATATGTGTAATAGGTTGCTGCTTGGAAAGACAAGGATGGGGATTGGTATGAAACAGG	93	2	Sub	N/A
1414	TTTATATGTAAGAGAGTTTGTATACAATGAAATAGTATATGTGTAACAGGTTGCTGCTTGGAAAGACAAGGATGGGGATTGGTATGAAACAGG	TTTATATGTAAGAGAGTTTGTATACAATGAAATAGTATATGTGTAACAGGTTGCTGCGTGGAAAGACAAGGATGGGGATTGGTATGAACCAGG	93	2	Sub	N/A
1415	TTTATATGTAAGAGAGTTTGTATACAATGAAATAGTATATGTGTAACAGGTTGCTGCTTGGAAAGACAAGGATGGGGATTGGTATGAAACAGG	TTTATATGTAAGAGAGTTTGTATACAATGAAATAGTATATGTGTAAAAGGTTGATGCTTGGAAAGACAAGGATGGGGATTGGTATGAAACAGG	93	2	Sub	N/A
1416	TTTATATGTAAGAGAGTTTGTATACAATGAAATAGTATATGTGTAACAGGTTGCTGCTTGGAAAGACAAGGATGGGGATTGGTATGAAACAGG	TTTATATGTAAGAGAGTTTGTATACAATGAAATAGTATATGTGTAATCGGTTGCGGCTTGGAAAGACAAGGATGGGGATTGGTATGAAACAGG	93	2	Sub	N/A
1417	TTTATATGTAAGAGAGTTTGTATACAATGAAATAGTATATGTGTAACAGGTTGCTGCTTGGAAAGACAAGGATGGGGATTGGTATGAAACAGG	TTTATATGTAAGAGAGTTTGTATACAATGAAATAGTATATGTGTAACAGGTTGCTGCTTGGAAAGAAAAGGATGGGGATTGGTGTGAAACAGG	93	2	Sub	N/A
1418	TTTATATGTAAGAGAGTTTGTATACAATGAAATAGTATATGTGTAACAGGTTGCTGCTTGGAAAGACAAGGATGGGGATTGGTATGAAACAGG	TTTATATGTAAGAGAGTTTGTATACAATGAAATAGTATATGTGTAACAGGTTGCTGCTTTGAAAGAC----ATGGGGATTGGTATGAAACAGG	89	2	del	N/A
1419	TTTATATGTAAGAGAGTTTGTATACAATGAAATAGTATATGTGTAACAGGTTGCTGCTTGGAAAGACAAGGATGGGGATTGGTATGAAACAGG	TTTATATGTAAGAGAGTTTGTATACAATGAAATAGTATATGTGTAACAGGTTGCTGCTTGGAAAGACGGGGATGGGGATTAGTATGAAACAGG	93	2	Sub	N/A
1420	TTTATATGTAAGAGAGTTTGTATACAATGAAATAGTATATGTGTAACAGGTTGCTGCTTGGAAAGACAAGGATGGGGATTGGTATGAAACAGG	TTTATATGTAAGAGAGTTTGTATACAATGAAATAGTGTATGTGTAACGGGTTGCTGCTTGGAAAGACAAGGATGGGGATTGGTACGAAACAGG	93	2	Sub	N/A
1421	TTTATATGTAAGAGAGTTTGTATACAATGAAATAGTATATGTGTAACAGGTTGCTGCTTGGAAAGACAAGGATGGGGATTGGTATGAAACAGG	TTTATATGTAAGAGGGTTTGTATACAATGAAATAGTATATGTGTAACAGGTTGCTGCTTGGAAAGACAACGATGGGGATTGGTATGAAACAGG	93	2	Sub	N/A
1422	TTTATATGTAAGAGAGTTTGTATACAATGAAATAGTATATGTGTAACAGGTTGCTGCTTGGAAAGACAAGGATGGGGATTGGTATGAAACAGG	TTTATATGTAAGAGAGTTTGTATAAAATGGAATAGTGTATGTGTAACGGGTTGCTGCTTGGAAAGACAAGGATGGGGATTGGTATGAAACAGG	93	2	Sub	N/A
1423	TTTATATGTAAGAGAGTTTGTATACAATGAAATAGTATATGTGTAACAGGTTGCTGCTTGGAAAGACAAGGATGGGGATTGGTATGAAACAGG	TTTATATGTAAGAGAGTTTGTATACAATGAAATAGTATATGTGTAACAGGTTGCTGCTTGGAAAGACCGGGATGGGGATTTGTATGAAACAGG	93	2	Sub	N/A
1424	TTTATATGTAAGAGAGTTTGTATACAATGAAATAGTATATGTGTAACAGGTTGCTGCTTGGAAAGACAAGGATGGGGATTGGTATGAAACAGG	TTTATATGTAAGAGAGTTTGTATACAATGAAATAGTATATGTGTAACGGGTTGCTGCTTGGAAAGACAAGAATGGGGATTGGTATGAAACAGG	93	2	Sub	N/A
1425	TTTATATGTAAGAGAGTTTGTATACAATGAAATAGTATATGTGTAACAGGTTGCTGCTTGGAAAGACAAGGATGGGGATTGGTATGAAACAGG	TTTATATGTAAGAGAGTTTGTATACAATGAAATAGTATATGTGTAAGAGGGTGCTGCTTGGAAAGACAAGGATGGGGATTGGTATGAAACAGG	93	2	Sub	N/A
1426	TTTATATGTAAGAGAGTTTGTATACAATGAAATAGTATATGTGTAACAGGTTGCTGCTTGGAAAGACAAGGATGGGGATTGGTATGAAACAGG	TTTATATGTAAGAGAGTTTGTATACAATGAAATAGTATATGTGTAACAGGGTGCTGCTTGGAAAGACAAGGATGGGGTTTGGTATGAAACAGG	93	2	Sub	N/A
1427	TTTATATGTAAGAGAGTTTGTATACAATGAAATAGTATATGTGTAACAGGTTGCTGCTTGGAAAGACAAGGATGGGGATTGGTATGAAACAGG	TTTATATGTAAGAGAGTTTGTATACAATGAAATAGTATATGTGTGACAGGTTGCTGCTTGGAAAGACAAGGATGGGGATTCGTATGAAACAGG	93	2	Sub	N/A
1428	TTTATATGTAAGAGAGTTTGTATACAATGAAATAGTATATGTGTAACAGGTTGCTGCTTGGAAAGACAAGGATGGGGATTGGTATGAAACAGG	TTTATATGTAAGAGGGTTTGTATACAATGAAATAGTATATGTGTAACAGGTTGCTGATTGGAAAGACAAGGATGGGGATTGGTATGAAACAGG	93	2	Sub	N/A
1429	TTTATATGTAAGAGAGTTTGTATACAATGAAATAGTATATGTGTAACAGGTTGCTGCTTGGAAAGACAAGGATGGGGATTGGTATGAAACAGG	TTTATATGTAAGAGAGTTTGTATACAATGAAATAGTATATGTGTAACAGGTTGGTGCTTGGAAAGTCAAGGATGGGGATTGGTATGAAACAGG	93	2	Sub	N/A
1430	TTTATATGTAAGAGAGTTTGTATACAATGAAATAGTATATGTGTAACAGGTTGCTGCTTGGAAAGACAAGGATGGGGATTGGTATGAAACAGG	TTTATATGTAAGAGAGTTTGTATACAATGAAATAGTATATGTGTAACAGGTTGCTGCTGGGGAAGACAAGGATGGGGATTGGTATGAAACAGG	93	2	Sub	N/A
1431	TTTATATGTAAGAGAGTTTGTATACAATGAAATAGTATATGTGTAACAGGTTGCTGCTTGGAAAGACAAGGATGGGGATTGGTATGAAACAGG	TTTATATGTAAGAGAGTTTGTATACAATGGAATAGTGTATGTGTAACGGGTTGCTGCTTGGAAAGACAAGGATGGGGATTGGTATGAAACAGA	93	2	Sub	N/A
1432	TTTATATGTAAGAGAGTTTGTATACAATGAAATAGTATATGTGTAACAGGTTGCTGCTTGGAAAGACAAGGATGGGGATTGGTATGAAACAGG	TTTATATGTAAGAGAGTTTGTATATAATGGAATAGTGTATGTGTAACGGGTTGCTGCTTGGAAAGACAAGGATGGGGATCGGTATGAAACAGG	93	2	Sub	N/A
1433	TTTATATGTAAGAGAGTTTGTATACAATGAAATAGTATATGTGTAACAGGTTGCTGCTTGGAAAGACAAGGATGGGGATTGGTATGAAACAGG	TTTATATGTAAGAGAGTTTGTATACAATGAAATAGTATATGTGTAACAGGTCGCGGCTTGGAAAGACAAGGATGGGGATTGGTATGAAACAGG	93	2	Sub	N/A
1434	TTTATATGTAAGAGAGTTTGTATACAATGAAATAGTATATGTGTAACAGGTTGCTGCTTGGAAAGACAAGGATGGGGATTGGTATGAAACAGG	TTTATATGTAAGAGAGTTTGTATACAATGAAATAGTATATGTGTAACAGGTTACTGCTTGGAAAGAAAAGGATGGGGATTGGTATGAAACAGG	93	2	Sub	N/A
1435	TTTATATGTAAGAGAGTTTGTATACAATGAAATAGTATATGTGTAACAGGTTGCTGCTTGGAAAGACAAGGATGGGGATTGGTATGAAACAGG	TTTATATGTAAGAGAGTTTGTATACAATGAAATAGTGTATGTGTAACAGGTTGCTGCTTGGAAAGAC----ATGGGGATTTGTATGAAACAGG	89	2	del	N/A
1436	TTTATATGTAAGAGAGTTTGTATACAATGAAATAGTATATGTGTAACAGGTTGCTGCTTGGAAAGACAAGGATGGGGATTGGTATGAAACAGG	TTTATATGTAAGAGAGTTTGTATACAATGAAATAGTATATGTGTAACGGGTTGCTGCTTGGAGAGACAAGGATGGGGATTGGTATGAAACAGG	93	2	Sub	N/A
1437	TTTATATGTAAGAGAGTTTGTATACAATGAAATAGTATATGTGTAACAGGTTGCTGCTTGGAAAGACAAGGATGGGGATTGGTATGAAACAGG	TTTATATGTAAGAGAGTTTGTATACAATGAAATAGTATATGTGTATCAGGTTGCTGCTTGGAAAGATAAGGATGGGGATTGGTATGAAACAGG	93	2	Sub	N/A
1438	TTTATATGTAAGAGAGTTTGTATACAATGAAATAGTATATGTGTAACAGGTTGCTGCTTGGAAAGACAAGGATGGGGATTGGTATGAAACAGG	TTTATATGTAAGAGAGTTTGTATACAATGAAATAGTATATGTGTAACTGGTTGCTGCTTGGAAAGACTTGGATGGGGATTGGTATGAAACACG	93	2	Sub	N/A
1439	TTTATATGTAAGAGAGTTTGTATACAATGAAATAGTATATGTGTAACAGGTTGCTGCTTGGAAAGACAAGGATGGGGATTGGTATGAAACAGG	TTTATATGTAAGAGAGTTTGTATACAATGAAATAGTATATGTGTAACAGGGTGCTGCTGGGAAAGACAAGGATGGGGATTAGTATGAAACAGG	93	2	Sub	N/A
1440	TTTATATGTAAGAGAGTTTGTATACAATGAAATAGTATATGTGTAACAGGTTGCTGCTTGGAAAGACAAGGATGGGGATTGGTATGAAACAGG	TTTATATGTAAGAGAGTTTGTATACAATGAAATAGTATATGTGTAACGGGTTGCTGCTTGGAAAGAGGAGGATGGGGATTGGTATGAAACAGG	93	2	Sub	N/A
1441	TTTATATGTAAGAGAGTTTGTATACAATGAAATAGTATATGTGTAACAGGTTGCTGCTTGGAAAGACAAGGATGGGGATTGGTATGAAACAGG	TTTATATGTAAGAGAGTTTGTATACAATGGAATAGTGTATGTGTAACGGGTTGCTGCTTGGAAAGACGAGGATGGGGATTGGTATGAAACAGG	93	2	Sub	N/A
1442	TTTATATGTAAGAGAGTTTGTATACAATGAAATAGTATATGTGTAACAGGTTGCTGCTTGGAAAGACAAGGATGGGGATTGGTATGAAACAGG	TTTATATGTAAGAGAGTTTGTATACAATGAAATAGTATATGTGTAACAGGTTGCTGCTTGGAAAGAAAAGGATGGGGATGGGTATGAAACAGG	93	2	Sub	N/A
1443	TTTATATGTAAGAGAGTTTGTATACAATGAAATAGTATATGTGTAACAGGTTGCTGCTTGGAAAGACAAGGATGGGGATTGGTATGAAACAGG	TTTATATGTAAGAGAGTTTGTATACAATGAAATAGTATATGTGTAACAGGTTGCTGCTTGGAAAGACCAAGATGGGGATTAGTATGAAACAGG	93	2	Sub	N/A
1444	TTTATATGTAAGAGAGTTTGTATACAATGAAATAGTATATGTGTAACAGGTTGCTGCTTGGAAAGACAAGGATGGGGATTGGTATGAAACAGG	TTTATATGTAAGAGAGTTTGTATACAATGAAATAGTATATGTGTAACAGGTTGCTGCTTGGAAAGAGAAGGCTGGGGATTGGTATGAAACAGG	93	2	Sub	N/A
1445	TTTATATGTAAGAGAGTTTGTATACAATGAAATAGTATATGTGTAACAGGTTGCTGCTTGGAAAGACAAGGATGGGGATTGGTATGAAACAGG	TTTATATGTAAGAGAGTTTGTATACAATGAAATAGTATATGTGTAACAGGTTGCTGCTTGGAAAGACCAGGATGGGGATTGGTATGAAACAAG	93	2	Sub	N/A
1446	TTTATATGTAAGAGAGTTTGTATACAATGAAATAGTATATGTGTAACAGGTTGCTGCTTGGAAAGACAAGGATGGGGATTGGTATGAAACAGG	TTTATATGTAAGAGAGTTTGTATACAATGAAATAGTACATGTGTAACAGGTTGCTGCTTGGAAAGACAAGGACGGGGATTGGTATGAAACAGG	93	2	Sub	N/A
1447	TTTATATGTAAGAGAGTTTGTATACAATGAAATAGTATATGTGTAACAGGTTGCTGCTTGGAAAGACAAGGATGGGGATTGGTATGAAACAGG	TTTATATGTAAGAGAGTTTGTATACAATGAAATAGTATATGTGTAATGGGTTGCTGCTTGGAAAGACAGGGATGGGGATTAGTATGAAACAGG	93	2	Sub	N/A
1448	TTTATATGTAAGAGAGTTTGTATACAATGAAATAGTATATGTGTAACAGGTTGCTGCTTGGAAAGACAAGGATGGGGATTGGTATGAAACAGG	TTTATATGTAAGAGAGTTTGTATACAATGAAATAGTATATGTGTAACAGGTTGCTGCTTGGAAAGATATGGATGGGGATTAGTATGAAACAGG	93	2	Sub	N/A
1449	TTTATATGTAAGAGAGTTTGTATACAATGAAATAGTATATGTGTAACAGGTTGCTGCTTGGAAAGACAAGGATGGGGATTGGTATGAAACAGG	TTTATATGTAAGAGAGTTTGTAT-CAATGAAATAGTATATGTGTAACAGGTTGCTGCTTGGAAAGACAAGGATGGGGATTGGTATGAAACAGG	92	2	del	N/A
1450	TTTATATGTAAGAGAGTTTGTATACAATGAAATAGTATATGTGTAACAGGTTGCTGCTTGGAAAGACAAGGATGGGGATTGGTATGAAACAGG	TTTATATGTAAGAGAGTTTGTATACAATGTAATAGTATATGTGTAATAGGTTGCTGCTTGGAAAGACAAGGATGGGGATTGGTATGAAACAGG	93	2	Sub	N/A
1451	TTTATATGTAAGAGAGTTTGTATACAATGAAATAGTATATGTGTAACAGGTTGCTGCTTGGAAAGACAAGGATGGGGATTGGTATGAAACAGG	TTTATATGTAAGAGAGTTTGTATACAATGAAGTAGTATATGTGTAACAGGTTGCTGCTTGGAAAGACAAGGATGGGGATTCGTATGAAACAGG	93	2	Sub	N/A
1452	TTTATATGTAAGAGAGTTTGTATACAATGAAATAGTATATGTGTAACAGGTTGCTGCTTGGAAAGACAAGGATGGGGATTGGTATGAAACAGG	TTTATATGTAAGAGAGTTTGTATATAATGAAACAGTGTATGTGTAACAGGTTGCTGCTTGGAAAGAAAAGGATGGGGATTGGTATGAAACAGG	93	2	Sub	N/A
1453	TTTATATGTAAGAGAGTTTGTATACAATGAAATAGTATATGTGTAACAGGTTGCTGCTTGGAAAGACAAGGATGGGGATTGGTATGAAACAGG	TTTATATGTAAGAGAGTTTGTATACAATGAAATAGTATATGTGTAACAGGTTGCTGCTTGGAAAGGCAAGGATGGGGATTGGTATGGAACAGG	93	2	Sub	N/A
1454	TTTATATGTAAGAGAGTTTGTATACAATGAAATAGTATATGTGTAACAGGTTGCTGCTTGGAAAGACAAGGATGGGGATTGGTATGAAACAGG	TTTATATGTAAGAGAGTTTGTATACAATGAACTAGTATATGTGTAACAGGTTGCTGCTTGGAAAGACAAGGATGGGGGTTGGTATGAAACAGG	93	2	Sub	N/A
1455	TTTATATGTAAGAGAGTTTGTATACAATGAAATAGTATATGTGTAACAGGTTGCTGCTTGGAAAGACAAGGATGGGGATTGGTATGAAACAGG	TTTATATGTAAGGGAGTTTGTATACAATGAAATAGTATATGTGTAACAGGTTGCTGCTTGGAAAGACAAGGATGGGGATTGGTATGAAACAGA	93	2	Sub	N/A
1456	TTTATATGTAAGAGAGTTTGTATACAATGAAATAGTATATGTGTAACAGGTTGCTGCTTGGAAAGACAAGGATGGGGATTGGTATGAAACAGG	TTTATATGTAAGAGAGTTTGTATACAATGAAATAGTATA--TGAAACAGGTTGCTGCTTGGAAAGACAAGGATGGGGATTGGTATGAAACAGG	91	2	del	N/A
1457	TTTATATGTAAGAGAGTTTGTATACAATGAAATAGTATATGTGTAACAGGTTGCTGCTTGGAAAGACAAGGATGGGGATTGGTATGAAACAGG	TTTATATGTAAGAGAGTTTGTATACAATGAAATAGTATATGTGTAACAGGTTGCTGCTTGGAAAGCAAAGGATGGGGATTGGTATGAAACACG	93	2	Sub	N/A
1458	TTTATATGTAAGAGAGTTTGTATACAATGAAATAGTATATGTGTAACAGGTTGCTGCTTGGAAAGACAAGGATGGGGATTGGTATGAAACAGG	TTTATATGTAAGAGAGTTTGTATACAATGAAATAGTATATGTGTAACACGTTGCTGCTTGGAAAGAC----ATGGGGATTGGTATGAAACAGG	89	2	del	N/A
1459	TTTATATGTAAGAGAGTTTGTATACAATGAAATAGTATATGTGTAACAGGTTGCTGCTTGGAAAGACAAGGATGGGGATTGGTATGAAACAGG	TTTATATGTAAGAGAGTTTGTATACAATGAAATAGTATATGTGTAACAGGTTGCGGCTTGGAAAGACTTGGATGGGGATTGGTATGAAACAGG	93	2	Sub	N/A
1460	TTTATATGTAAGAGAGTTTGTATACAATGAAATAGTATATGTGTAACAGGTTGCTGCTTGGAAAGACAAGGATGGGGATTGGTATGAAACAGG	TTTATATGTAAGAGAGTTTGTATACAATGAAATAGTATATGTGTAACCGGTTGCTGCTTGGAAAGACCAGGATGGGGATTGCTATGAAACAGG	93	2	Sub	N/A
1461	TTTATATGTAAGAGAGTTTGTATACAATGAAATAGTATATGTGTAACAGGTTGCTGCTTGGAAAGACAAGGATGGGGATTGGTATGAAACAGG	TTTATATGTAAGAGAGTTTGTATACAATGAAATAGTATATGTGTAACAGGTTTCTGCTTGGAAAGATAAGGATGGGGATTCGTATGAAACAGG	93	2	Sub	N/A
1462	TTTATATGTAAGAGAGTTTGTATACAATGAAATAGTATATGTGTAACAGGTTGCTGCTTGGAAAGACAAGGATGGGGATTGGTATGAAACAGG	TTTATATGTAAGAGAGTTTGTATACAATGAAATAGTATATGTGTAACTGGTTTCTGCTTGGAAAGATAAGGATGGGGATTGGTATGAAACAGG	93	2	Sub	N/A
1463	TTTATATGTAAGAGAGTTTGTATACAATGAAATAGTATATGTGTAACAGGTTGCTGCTTGGAAAGACAAGGATGGGGATTGGTATGAAACAGG	TTTATATGTAAGAGAGTTTGTATATAATGGAATAGTGTATGTGTAACGGGTTGCTGCTTGGAAAGACAAGGATGGGGGTTGGTATGAAACAGG	93	2	Sub	N/A
1464	TTTATATGTAAGAGAGTTTGTATACAATGAAATAGTATATGTGTAACAGGTTGCTGCTTGGAAAGACAAGGATGGGGATTGGTATGAAACAGG	TTTATATGTAAGAGAGTTTGTATACAATGAAATAGTATATGTGTAATAGGTTGCTGCTTGGAAAGAGAAGGATGGGGGTTGGTATGAAACAGG	93	2	Sub	N/A
1465	TTTATATGTAAGAGAGTTTGTATACAATGAAATAGTATATGTGTAACAGGTTGCTGCTTGGAAAGACAAGGATGGGGATTGGTATGAAACAGG	TTTATATGTAAGAGAGTTTGTATACAATGAAATAGTATATGTGTAATAGGTTGCTGCTTGGAAAGACATGGATGGGGATTGGTATGGAACAGG	93	2	Sub	N/A
1466	TTTATATGTAAGAGAGTTTGTATACAATGAAATAGTATATGTGTAACAGGTTGCTGCTTGGAAAGACAAGGATGGGGATTGGTATGAAACAGG	TTTATATGTAAGAGAGTTTGTATATAATGAAA-AGTATATGTGTAACAGGTTGCTGCTTGGAAAGACAAGGATGGGGATTGGTATGAAACAGG	92	2	del	N/A
1467	TTTATATGTAAGAGAGTTTGTATACAATGAAATAGTATATGTGTAACAGGTTGCTGCTTGGAAAGACAAGGATGGGGATTGGTATGAAACAGG	TTTATATGTAAGAGAGTTTGTATACAATGAAATAGTATATGTGTAATAGGTTGCTGCTTGGAAAGAAAAGGATGGGGATTGATATGAAACAGG	93	2	Sub	N/A
1468	TTTATATGTAAGAGAGTTTGTATACAATGAAATAGTATATGTGTAACAGGTTGCTGCTTGGAAAGACAAGGATGGGGATTGGTATGAAACAGG	TTTATATGTAAGAGAGTTTGTATACAATAAAATAGTATATGTGTAACAGGTTGCTGCTTGGAAAGACAAGGATGGGGATTAGTATGAAACAGG	93	2	Sub	N/A
1469	TTTATATGTAAGAGAGTTTGTATACAATGAAATAGTATATGTGTAACAGGTTGCTGCTTGGAAAGACAAGGATGGGGATTGGTATGAAACAGG	TTTATATGTAAGAGAGTTTGTATACAATGAAATAGTATATGTGTAATAGGTTGCTGCTTGGAAAGAAAAGGATGGGGCTTAGTATGAAACAGG	93	2	Sub	N/A
1470	TTTATATGTAAGAGAGTTTGTATACAATGAAATAGTATATGTGTAACAGGTTGCTGCTTGGAAAGACAAGGATGGGGATTGGTATGAAACAGG	TTTATATGTAAGAGAGTTTGTATACAATGAAATAGTATATGTGTAACAGGTTGATGCTTGGAAAGACACGGATGGGGATTGGTATGAAACAGG	93	2	Sub	N/A
1471	TTTATATGTAAGAGAGTTTGTATACAATGAAATAGTATATGTGTAACAGGTTGCTGCTTGGAAAGACAAGGATGGGGATTGGTATGAAACAGG	TTTATATGTAAGAGAGTTTGTATACAATGAAATAGTATATGTGTAACAGGTTGCTGCTTGGAAAGACAAGCATGGGGATTGGTATGAGACAGG	93	2	Sub	N/A
1472	TTTATATGTAAGAGAGTTTGTATACAATGAAATAGTATATGTGTAACAGGTTGCTGCTTGGAAAGACAAGGATGGGGATTGGTATGAAACAGG	TTTATATGTAAGAGAGTTTGTATACAATGAAATAGTATATGTGTAACAGGTTGCTGCTTGGAAAGACTGGGATGGGGATTCGTATGAAACAGG	93	2	Sub	N/A
1473	TTTATATGTAAGAGAGTTTGTATACAATGAAATAGTATATGTGTAACAGGTTGCTGCTTGGAAAGACAAGGATGGGGATTGGTATGAAACAGG	TTTATATGTAATAGAGTTTGTATACAATGAAATAGTATATGTGTAACAGGTTGCTGCTTGGAAAGACAAGGATGGGGATTAGTATGAAACAGG	93	2	Sub	N/A
1474	TTTATATGTAAGAGAGTTTGTATACAATGAAATAGTATATGTGTAACAGGTTGCTGCTTGGAAAGACAAGGATGGGGATTGGTATGAAACAGG	TTTATATGTAAGAGAGTTTGTATACAATGAAATAGTATATGTGTAACAGGTTGCTGCTTGGAAAGACAAGGATGGGGGTTGGTCTGAAACAGG	93	2	Sub	N/A
1475	TTTATATGTAAGAGAGTTTGTATACAATGAAATAGTATATGTGTAACAGGTTGCTGCTTGGAAAGACAAGGATGGGGATTGGTATGAAACAGG	TTTATATGTAAGAGAGTTTGTATACAATGAAATAGTATATGTGTAACAGGTTGCTGCTTGGAAGGAAAAGGATGGGGATTGGTATGAAACAGG	93	2	Sub	N/A
1476	TTTATATGTAAGAGAGTTTGTATACAATGAAATAGTATATGTGTAACAGGTTGCTGCTTGGAAAGACAAGGATGGGGATTGGTATGAAACAGG	TTTATATGTAAGAGAGTTTGTATACAATGAAATAGTATATGTGTAACAGGTTGCTGCTTGGAAAGACAAGGATGGGGCTTGGTATGAAAAAGG	93	2	Sub	N/A
1477	TTTATATGTAAGAGAGTTTGTATACAATGAAATAGTATATGTGTAACAGGTTGCTGCTTGGAAAGACAAGGATGGGGATTGGTATGAAACAGG	TTTATATGTAAGAGAGTTTGTATACAATGAAATAGTATATGTGTAACGGGTTGCTGCTTGGAGAGACGAGGATGGGGATTGGTATGAAACAGG	93	2	Sub	N/A
1478	TTTATATGTAAGAGAGTTTGTATACAATGAAATAGTATATGTGTAACAGGTTGCTGCTTGGAAAGACAAGGATGGGGATTGGTATGAAACAGG	TTTATATGTAAGAGAGTTTGTATACAATGAAATAGTATATGTGTAACTGGTTGTTGCTTGGAAAGATTTGGATGGGGGTTGGTATGAAACAGG	93	2	Sub	N/A
1479	TTTATATGTAAGAGAGTTTGTATACAATGAAATAGTATATGTGTAACAGGTTGCTGCTTGGAAAGACAAGGATGGGGATTGGTATGAAACAGG	TTTATATGTAAGAGAGTTTGTATACAATGAAATAGTATATGTGTAACTGGTTGCGGCTTGGAAAGATTAGGATGGGGGTTGCTATGAAACAGG	93	2	Sub	N/A
1480	TTTATATGTAAGAGAGTTTGTATACAATGAAATAGTATATGTGTAACAGGTTGCTGCTTGGAAAGACAAGGATGGGGATTGGTATGAAACAGG	TTTATATGTAAGAGAGTTTGTATACAATGAAATAGTATATGTGTAACAGGTTGCTACTTGGAAAGACAAGGATGGGGATTTGTATGAAACAGG	93	2	Sub	N/A
1481	TTTATATGTAAGAGAGTTTGTATACAATGAAATAGTATATGTGTAACAGGTTGCTGCTTGGAAAGACAAGGATGGGGATTGGTATGAAACAGG	TTTATATGTAAGAGAGTTTGTATACAATGAAATAGTATATGTGTAACCGGTTGCTGCTTGGAAAGAAAAGGATGGGGATTGGTATGCAACAGG	93	2	Sub	N/A
1482	TTTATATGTAAGAGAGTTTGTATACAATGAAATAGTATATGTGTAACAGGTTGCTGCTTGGAAAGACAAGGATGGGGATTGGTATGAAACAGG	TTTATATGTAAGAGAGTTTGTATACAATGAAATAGTATATGTGTAACAGGTTGCTGCTTGGAAAGACGAGGATGGGGATTGGTATGATACAGG	93	2	Sub	N/A
1483	TTTATATGTAAGAGAGTTTGTATACAATGAAATAGTATATGTGTAACAGGTTGCTGCTTGGAAAGACAAGGATGGGGATTGGTATGAAACAGG	TTTATATGAAAGAGAGTTTGTATACAATGAAATAGTATATGTGTAACAGGTTGCTGCTTGGAAAGACAAGGATGGAAATTGGTATGAAACAGG	93	2	Sub	N/A
1484	TTTATATGTAAGAGAGTTTGTATACAATGAAATAGTATATGTGTAACAGGTTGCTGCTTGGAAAGACAAGGATGGGGATTGGTATGAAACAGG	TTTATATGTAAGAGAGTTTGTATACAATGAAATAGTATATGTGTAACAGGTTGCTGCTTGGAAAGACAGGGATGTGGATTGGTATGAAACAGG	93	2	Sub	N/A
1485	TTTATATGTAAGAGAGTTTGTATACAATGAAATAGTATATGTGTAACAGGTTGCTGCTTGGAAAGACAAGGATGGGGATTGGTATGAAACAGG	TTTATATGTAAGAGAGTTTGTATACAATGAAATAGTATATGTGTAACCGGTTGCGGCTTGGAAAGACTTGGATGGGGATTCGTATGAAACAGG	93	2	Sub	N/A
1486	TTTATATGTAAGAGAGTTTGTATACAATGAAATAGTATATGTGTAACAGGTTGCTGCTTGGAAAGACAAGGATGGGGATTGGTATGAAACAGG	TTTATATGTGAGAGAGTTTGTATACAATGAAATAGTATATGTGTAACAGGTTGCTGCTTGGAAAGAC----ATGGGGATTGGTATGAAACAGG	89	2	del	N/A
1487	TTTATATGTAAGAGAGTTTGTATACAATGAAATAGTATATGTGTAACAGGTTGCTGCTTGGAAAGACAAGGATGGGGATTGGTATGAAACAGG	TTTATATGTAAGAGAGTTTGTATACAATGAAATAGTATATGTGTAACGGGTTGCTGCCTGGAAAGACGAGGATGGGGATTGGTATGAAACAGG	93	2	Sub	N/A
1488	TTTATATGTAAGAGAGTTTGTATACAATGAAATAGTATATGTGTAACAGGTTGCTGCTTGGAAAGACAAGGATGGGGATTGGTATGAAACAGG	TCTATATGTAAGAGAGTTTGTATACAATGAAATAGTATATGTGTAACAGGTTGCTGCTTGGAAAGAC----ATGGGGATTGGTATGAAACAGG	89	2	del	N/A
1489	TTTATATGTAAGAGAGTTTGTATACAATGAAATAGTATATGTGTAACAGGTTGCTGCTTGGAAAGACAAGGATGGGGATTGGTATGAAACAGG	TTTATATGTAAGAGAGTTTGTATACAATGAAATAGTATATGTGTAACAGGTTGCTGCCTGGAAAGACCAGGATGGGGATTGGTATGAAACAGG	93	2	Sub	N/A
1490	TTTATATGTAAGAGAGTTTGTATACAATGAAATAGTATATGTGTAACAGGTTGCTGCTTGGAAAGACAAGGATGGGGATTGGTATGAAACAGG	TTTATATGTA--AGAGGTTGTATATAATGAAACAGTGTATGTGTAACAGGTTGCTGCTTGGAAAGACAAGGATGGGGATTGGTATGAAACAGG	91	2	del	N/A
1491	TTTATATGTAAGAGAGTTTGTATACAATGAAATAGTATATGTGTAACAGGTTGCTGCTTGGAAAGACAAGGATGGGGATTGGTATGAAACAGG	TTTATATGTAAGAGAGTTTGTATACAATGAAATAGTATATGTGTAACAGGTTGCTGCTTGGAAAGACAAGTAGGGGGATTGGTATGAAACAGG	93	2	Sub	N/A
1492	TTTATATGTAAGAGAGTTTGTATACAATGAAATAGTATATGTGTAACAGGTTGCTGCTTGGAAAGACAAGGA-----TGGGGATTGGTATGAAACAGG	TTTATATGTAAGAGAGTTTGTATACAATGAAATAGTATATGTGTAACAGGTTGCTGCTTGGAAAGACAAGGATGGACTGGGGATTGGTATGAAACAGG	98	2	Ins	N/A
1493	TTTATATGTAAGAGAGTTTGTATACAATGAAATAGTATATGTGTAACAGGTTGCTGCTTGGAAAGACAAGGATGGGGATTGGTATGAAACAGG	TTTATATGTAAGAGAGTTTGTATACAATGAAATAGTGTATGTGTAATGGGTTGCTGCTTGGAAAGACAAGGATGGGGATTGGTATGAAACAGG	93	2	Sub	N/A
1494	TTTATATGTAAGAGAGTTTGTATACAATGAAATAGTATATGTGTAACAGGTTGCTGCTTGGAAAGACAAGGATGGGGATTGGTATGAAACAGG	TTTATATGTAAGAGAGTTTGTATACAATGAAATAGTATATGTGTAACAGGTTTCTGCTTGGAAAGACAAGGATGGGGATTGCTATGAAACAGG	93	2	Sub	N/A
1495	TTTATATGTAAGAGAGTTTGTATACAATGAAATAGTATATGTGTAACAGGTTGCTGCTTGGAAAGACAAGGATGGGGATTGGTATGAAACAGG	TTTATATGTAAGAGAGTTTGTATACAATGAAATAGTATATGTTTAACAGGTTGCTGCTTGGAAAGATAAGGATGGGGATTGGTATGAAACAGG	93	2	Sub	N/A
1496	TTTATATGTAAGAGAGTTTGTATACAATGAAATAGTATATGTGTAACAGGTTGCTGCTTGGAAAGACAAGGATGGGGATTGGTATGAAACAGG	TTTATATGTAAGAGAGTTTGTATACAATGAAATAGTATATGTGTAACAGGTTGCTGCTTGGAAAGATCAGGATGGGGATTCGTATGAAACAGG	93	2	Sub	N/A
1497	TTTATATGTAAGAGAGTTTGTATACAATGAAATAGTATATGTGTAACAGGTTGCTGCTTGGAAAGACAAGGATGGGGA-TTGGTATGAAACAGG	TTTATATGTAAGAGAGTTTGTATACAATGAAATAGTATATGTGTAACAGGTTGCTGCTTGGAAAGACAAGGATGGGGATTTGGTATGAAACAGG	94	2	Ins	N/A
1498	TTTATATGTAAGAGAGTTTGTATACAATGAAATAGTATATGTGTAACAGGTTGCTGCTTGGAAAGACAAGGATGGGGATTGGTATGAAACAGG	TTTATATGTAAGAGAGTTTGTATACAATGAAATAGTATATGTGTAACATGTTGCTGCTTGGAAAGACAAGGATGGGGATTAGTATGAAACAGG	93	2	Sub	N/A
1499	TTTATATGTAAGAGAGTTTGTATACAATGAAATAGTATATGTGTAACAGGTTGCTGCTTGGAAAGACAAGGATGGGGATTGGTATGAAACAGG	TTTATATGTAAGAGAGTTTGTATACCATGAAATAGTATATGTGTAACAGGTTGCTGCTTGGAAAGACAAGGATGGGGATTGGTATGATACAGG	93	2	Sub	N/A
1500	TTTATATGTAAGAGAGTTTGTATACAATGAAATAGTATATGTGTAACAGGTTGCTGCTTGGAAAGACAAGGATGGGGATTGGTATGAAACAGG	TTTATATGTAAGAGGGTTTGTATACAATGAAATAGTATATGTGTAACAGGTTGCTGCTTGGAAAGACAAGGAGGGGGATTGGTATGAAACAGG	93	2	Sub	N/A
1501	TTTATATGTAAGAGAGTTTGTATACAATGAAATAGTATATGTGTAACAGGTTGCTGCTTGGAAAGACAAGGATGGGGATTGGTATGAAACAGG	TTTATATGTAAGAGAGTTTGTATACAATGAAATAGTATATGTGTAACAGGTTGCTGCTTGGAAAGAGTAGGATGGGGATTAGTATGAAACAGG	93	2	Sub	N/A
1502	TTTATATGTAAGAGAGTTTGTATACAATGAAATAGTATATGTGTAACAGGTTGCTGCTTGGAAAGACAAGGATGGGGATTGGTATGAAACAGG	TTTATATGTAAGAGAGTTTGTATACAATGAAATAGTATATGTGTAACAGGTTGATGCCTGGAAAGACGAGGATGGGGATTGGTATGAAACAGG	93	2	Sub	N/A
1503	TTTATATGTAAGAGAGTTTGTATACAATGAAATAGTATATGTGTAACAGGTTGCTGCTTGGAAAGACAAGGATGGGGATTGGTATGAAACAGG	TTTATATGTAAGAGAGTTTGTATACAATGAAATAGTATATGTGTAACAGGTTACTGCTTGGAAAGACAAGGATGGGGTTTGGTATGAAACAGG	93	2	Sub	N/A
1504	TTTATATGTAAGAGAGTTTGTATACAATGAAATAGTATATGTGTAACAGGTTGCTGCTTGGAAAGACAAGGATGGGGATTGGTATGAAACAGG	TTTATATGTAAGAGAGTTTGTATACAATGAAATAGTATATGTGTTATAGGTTGCTTCTTGGAAAGACAAGGATGGGGATTAGTATGAAACAGG	93	2	Sub	N/A
1505	TTTATATGTAAGAGAGTTTGTATACAATGAAATAGTATATGTGTAACAGGTTGCTGCTTGGAAAGACAAGGATGGGGATTGGTATGAAACAGG	TTTATATGTAAGAGAGTTTGTATACAATGAAATAGTATATGTGTAACTGGTTGCGGCTTGGAAAGACTAGGATGGGGGTTGGTATGAAACAGG	93	2	Sub	N/A
1506	TTTATATGTAAGAGAGTTTGTATACAATGAAATAGTATATGTGTAACAGGTTGCTGCTTGGAAAGACAAGGATGGGGATTGGTATGAAACAGG	TTTATATGTAAGAGAGTTTGTATACAATGAAATAGTATATGTGTAACAGGTTGCGGCTTGGAAAGACTAGGATGGGGATTGGTATGAGACAGG	93	2	Sub	N/A
1507	TTTATATGTAAGAGAGTTTGTATACAATGAAATAGTATATGTGTAACAGGTTGCTGCTTGGAAAGACAAGGATGGGGATTGGTATGAAACAGG	TTTATATGTAAGAGAGTTTGTATACAATGAAATAGTATATGTGTAACAGGTTGCTGCTTGGAAAGACAAGAATGGGGGTTGGTATGAAACAGG	93	2	Sub	N/A
1508	TTTATATGTAAGAGAGTTTGTATACAATGAAATAGTATATGTGTAACAGGTTGCTGCTTGGAAAGACAAGGATGGGGATTGGTATGAAACAGG	TTTATATGTAAGAGAGTTTGTATACAATGAAATAGTATATGTGTAACAGGTTGCTGCTTGGAAAGATTAGGATGGGGATTCGTATGAAACAGG	93	2	Sub	N/A
1509	TTTATATGTAAGAGAGTTTGTATACAATGAAATAGTATATGTGTAACAGGTTGCTGCTTGGAAAGACAAGGATGGGGATTGGTATGAAACAGG	TTTATATGTAAGAGAGTTTGTATACAATGAAATAGTATATGTGTAATAGGTTGCTGCTTGGGAAGACAA----GGGGATTGGTATGAAACAGG	89	2	del	N/A
1510	TTTATATGTAAGAGAGTTTGTATACAATGAAATAGTATATGTGTAACAGGTTGCTGCTTGGAAAGACAAGGATGGGGATTGGTATGAAACAGG	TTTATATGTAAGAGAGTTTGTATACAATGAAATAGTATATGTGTAACAGGTCGCTGCTTGGAAAGACAAAGATGGGGATTGGTATGAAACAGG	93	2	Sub	N/A
1511	TTTATATGTAAGAGAGTTTGTATACAATGAAATAGTATATGTGTAACAGGTTGCTGCTTGGAAAGACAAGGATGGGGATTGGTATGAAACAGG	TTTATATGTAAGAGAGTTTGTATACAATGAAATAGTATATGTGTAACAGGTTGCGGCTTGGAAAGACTTGGATGGGGGTTGGTATGAAACAGG	93	2	Sub	N/A
1512	TTTATATGTAAGAGAGTTTGTATACAATGAAATAGTATATGTGTAACAGGTTGCTGCTTGGAAAGACAAGGATGGGGATTGGTATGAAACAGG	TTTATATGTAAGAGAGTTTGTATACAATGAAATCGTATATGTGTAACAGGTTGCTGCTTGGAAAGACAAGGATGGGGATTGGTATGAAACAGA	93	2	Sub	N/A
1513	TTTATATGTAAGAGAGTTTGTATACAATGAAATAGTATATGTGTAACAGGTTGCTGCTTGGAAAGACAAGGATGGGGATTGGTATGAAACAGG	TTTATATGTAAGAGAGTTTGTATACAATGAAATAGTATATGTGTATCTGGTTGCTGCTTGGAAAGACAAGGATGGGGATTGGTATGAAACAGG	93	2	Sub	N/A
1514	TTTATATGTAAGAGAGTTTGTATACAATGAAATAGTATATGTGTAACAGGTTGCTGCTTGGAAAGACAAGGATGGGGATTGGTATGAAACAGG	TTTATATGTAAGAGAGTTTGTATACAATGAAATAGTATATGTGTAAGAGGTTGCTGCTTGGAAAGACAAGGATGGGGTTTGGTATGAAACAGG	93	2	Sub	N/A
1515	TTTATATGTAAGAGAGTTTGTATACAATGAAATAGTATATGTGTAACAGGTTGCTGCTTGGAAAGACAAGGATGGGGATTGGTATGAAACAGG	TTTATATGTAAGAGAGTTTGTATACAATGAACTAGTATATGTGTAATAGGTTGCTGCTTGGAAAGACAAGGATGGGGATTCGTATGAAACAGG	93	2	Sub	N/A
1516	TTTATATGTAAGAGAGTTTGTATACAATGAAATAGTATATGTGTAACAGGTTGCTGCTTGGAAAGACAAGGATGGGGATTGGTATGAAACAGG	TTTATATGTAAGAGAGTTTGTATACAATGAAATAGTATATGTGTAACCGGTTGCTGCTTGGAAAGACAAGGCTGGGGATTGGTATGAAACAGG	93	2	Sub	N/A
1517	TTTATATGTAAGAGAGTTTGTATACAATGAAATAGTATATGTGTAACAGGTTGCTGCTTGGAAAGACAAGGATGGGGATTGGTATGAAACAGG	TTTATATGTAAGAGAGTTTGTATACAATGAAATAGTATATGTGTAACAGGTTGCTGCTTGGAACGACAAGGATGGGGATTGGTATGAAAAAGG	93	2	Sub	N/A
1518	TTTATATGTAAGAGAGTTTGTATACAATGAAATAGTATATGTGTAACAGGTTGCTGCTTGGAAAGACAAGGATGGGGATTGGTATGAAACAGG	TTTATATGTAAGAGAGTTTGTATACAATGAAATAGTATATGTGTAACAAGTTGCTGCTTGGAAAGACAAGGATGGGGATTCGTATGAAACAGG	93	2	Sub	N/A
1519	TTTATATGTAAGAGAGTTTGTATACAATGAAATAGTATATGTGTAACAGGTTGCTGCTTGGAAAGACAAGGATGGGGATTGGTATGAAACAGG	TTTATATGTAAGAGAGTTTGTATACAATGAAATAGTATATGTGTAACAGGTTGCTGCTTGGAAAGACATGGATGGGGATTGGTATGAACCAGG	93	2	Sub	N/A
1520	TTTATATGTAAGAGAGTTTGTATACAATGAAATAGTATATGTGTAACAGGTTGCTGCTTGGAAAGACAAGGATGGGGATTGGTATGAAACAGG	TTTATATGTAAGAGAGTTTGTATACAATGAAATAGTATATGTGTAACGGGTTGCTGCTTAGAAAGACAAGGATGGGGATTGGTATGAAACAGG	93	2	Sub	N/A
1521	TTTATATGTAAGAGAGTTTGTATACAATGAAATAGTATATGTGTAACAGGTTGCTGCTTGGAAAGACAAGGATGGGGATTGGTATGAAACAGG	TTTATATGTAAGAGAGTTTGTATACAATGAAATAGTATATGTGTAAAAGGTTGCTGCTTGGAAAGACAAGGATGGGGATTGGTATGGAACAGG	93	2	Sub	N/A
1522	TTTATATGTAAGAGAGTTTGTATACAATGAAATAGTATATGTGTAACAGGTTGCTGCTTGGAAAGACAAGGATGGGGATTGGTATGAAACAGG	TTTATATGTAAGAGAGTTTTTATACAATGAAATAGTATATGTGTAACAGGTTGCTGCTTTGAAAGACAAGGATGGGGATTGGTATGAAACAGG	93	2	Sub	N/A
1523	TTTATATGTAAGAGAGTTTGTATACAATGAAATAGTATATGTGTAACAGGTTGCTGCTTGGAAAGACAAGGATGGGGATTGGTATGAAACAGG	TTTATATGTAAGAGAGTTTGTATACACTGAAATAGTATATGTGTAATAGGTTGCTGCTTGGAAAGACAAGGATGGGGATTGGTATGAAACAGG	93	2	Sub	N/A
1524	TTTATATGTAAGAGAGTTTGTATACAATGAAATAGTATATGTGTAACAGGTTGCTGCTTGGAAAGACAAGGATGGGGATTGGTATGAAACAGG	TTTATATGTAAGAGAGTTTGTATACAATGAAATAGTATATGTGTAATTGGTTGCGGCTTGGAAAGACTAGGATGGGGGTTGGTATGAAACAGG	93	2	Sub	N/A
1525	TTTATATGTAAGAGAGTTTGTATACAATGAAATAGTATATGTGTAACAGGTTGCTGCTTGGAAAGACAAGGATGGGGATTGGTATGAAACAGG	TTTATATGTAAGAGAGTTTGTATACAATGAAATAGTATATGTGTAACAGGTTGCTGCTTGGAAAGATAAGGATGGGGATTGGTATGAAACAGA	93	2	Sub	N/A
1526	TTTATATGTAAGAGAGTTTGTATACAATGAAATAGTATATGTGTAACAGGTTGCTGCTTGGAAAGACAAGGATGGGGATTGGTATGAAACAGG	TTTATATGTAAGAGAGTTTGTATACAATGAAATAGTATATGTGTAATGGGTTGCTGCTTGGAAAGACAGGGATGGGGATTGGTATGAAACAGG	93	2	Sub	N/A
1527	TTTATATGTAAGAGAGTTTGTATACAATGAAATAGTATATGTGTAACAGGTTGCTGCTTGGAAAGACAAGGATGGGGATTGGTATGAAACAGG	TTTATATGTAAGAGAGTTTGTATACAATGAAATAGTATATGTGTAACAGGTTGCTGCTTGGAAAGAGAGGGATGGGGATTGGGATGAAACAGG	93	2	Sub	N/A
1528	TTTATATGTAAGAGAGTTTGTATACAATGAAATAGTATATGTGTAACAGGTTGCTGCTTGGAAAGACAAGGATGGGGATTGGTATGAAACAGG	TTTATATGTAAGAGAGTTTGTATACAATGAAATAGTATATGTGTAACTGCTTGCTGCATGGAAAGACAAGGATGGGGATTGGTATGAAACAGG	93	2	Sub	N/A
1529	TTTATATGTAAGAGAGTTTGTATACAATGAAATAGTATATGTGTAACAGGTTGCTGCTTGGAAAGACAAGGATGGGGATTGGTATGAAACAGG	TTTATATGTAAGAGAGTTTGTATACAATGAAACAGTGTATGTGTAACAGGTTGCTGCTTGGAAAGAC----ATGGGGATTGGTATGAAACAGA	89	2	del	N/A
1530	TTTATATGTAAGAGAGTTTGTATACAATGAAATAGTATATGTGTAACAGGTTGCTGCTTGGAAAGACAAGGATGGGGATTGGTATGAAACAGG	TTTAGATGTAAGAGAGTTTGTATACAATGAAATAGTATATGTGTAATAGGTTGCTGCTTGGAAAGACAAGGATGGGGATTGGTATGAAACAGG	93	2	Sub	N/A
1531	TTTATATGTAAGAGAGTTTGTATACAATGAAATAGTATATGTGTAACAGGTTGCTGCTTGGAAAGACAAGGATGGGGATTGGTATGAAACAGG	TTTATATGTAAGAGAGTTTGTATACAATGAAATAGTGTATGTGTAACAGGTTGCTGCTTGGAAAGAC----ATGGGGATTGGTATGAAACAGA	89	2	del	N/A
1532	TTTATATGTAAGAGAGTTTGTATACAATGAAATAGTATATGTGTAACAGGTTGCTGCTTGGAAAGACAAGGATGGGGATTGGTATGAAACAGG	TTTATATGTAAGAGAGTTTGTATACAATGAAATAGTATATGTGTAACAGGTTGCTGCTTGGAAAGACCGGGATGGGGCTTGGTATGAAACAGG	93	2	Sub	N/A
1533	TTTATATGTAAGAGAGTTTGTATACAATGAAATAGTATATGTGTAACAGGTTGCTGCTTGGAAAGACAAGGATGGGGATTGGTATGAAACAGG	TTTATATGTAAGAGAGTTTGTATACAATGAAATAGTATAAGTGTAATAGGTTGCTGCTTGGAAAGACAAGGATGGGGATTGGTATGAAACAGG	93	2	Sub	N/A
1534	TTTATATGTAAGAGAGTTTGTATACAATGAAATAGTATATGTGTAACAGGTTGCTGCTTGGAAAGACAAGGATGGGGATTGGTATGAAACAGG	TTTATATGTAAGAGAGTTTGTATACAATGAAATAGTATATGTGTAACAGGTTGCTGCTTGGAAAGAGATGGATGGGGATTTGTATGAAACAGG	93	2	Sub	N/A
1535	TTTATATGTAAGAGAGTTTGTATACAATGAAATAGTATATGTGTAACAGGTTGCTGCTTGGAAAGACAAGGATGGGGATTGGTATGAAACAGG	TTTATATGTAAGAGAGTTTGTATACAATGAAATAGTATATGTGTAAAAGGTTGGTGCTTGGAAAGACAAGGATGGGGATTGGTATGAAACAGG	93	2	Sub	N/A
1536	TTTATATGTAAGAGAGTTTGTATACAATGAAATAGTATATGTGTAACAGGTTGCTGCTTGGAAAGACAAGGATGGGGATTGGTATGAAACAGG	TTTATATGTAAGAGAGTTTGTATACAATGAAATAGTATATGTGTAACAGGTTGCTGCTTGGAAAGAGAAGGAAGGGGATTGGTATGAAACAGG	93	2	Sub	N/A
1537	TTTATATGTAAGAGAGTTTGTATACAATGAAATAGTATATGTGTAACAGGTTGCTGCTTGGAAAGACAAGGATGGGGATTGGTATGAAACAGG	CTTATATGTAAGAGAGTTTGTATACAATGAAATAGTATATGTGTAACAGGTTGCTGCTTGGAAAGAC----ATGGGGATTGGTATGAAACAGG	89	2	del	N/A
1538	TTTATATGTAAGAGAGTTTGTATACAATGAAATAGTATATGTGTAACAGGTTGCTGCTTGGAAAGACAAGGATGGGGATTGGTATGAAACAGG	TTTATATGTAAGAGAGTTTGTATACAATGAAATAGTATATGTGTAATCGGTTTCTGCTTGGAAAGACAAGGATGGGGATTGGTATGAAACAGG	93	2	Sub	N/A
1539	TTTATATGTAAGAGAGTTTGTATACAATGAAATAGTATATGTGTAACAGGTTGCTGCTTGGAAAGACAAGGATGGGGATTGGTATGAAACAGG	TTTATATGTAAGAGAGTTTGTATACAATGAAATAGTATATGTGTAATAGGTTGCGGCTTGGAAAGACTAGGATGGGGATTGGTATGAAACAGG	93	2	Sub	N/A
1540	TTTATATGTAAGAGAGTTTGTATACAATGAAATAGTATATGTGTAACAGGTTGCTGCTTGGAAAGACAAGGATGGGGATTGGTATGAAACAGG	TTTATATGTAAGAGAGTTTGTATACAATGAAATGGTATATGTGTAACAGGTTGCTGCTTGGAAAGACAAAGATGGGGATTGGTATGAAACAGG	93	2	Sub	N/A
1541	TTTATATGTAAGAGAGTTTGTATACAATGAAATAGTATATGTGTAACAGGTTGCTGCTTGGAAAGACAAGGATGGGGATTGGTATGAAACAGG	TTTATATGTAAGAGAGTTTGTATATAATGAAATAGTGTATGTGTAACAGGTTGCTGCTTGGAAAGAC----ATGGGGATTGGTATGAAACAGG	89	2	del	N/A
1542	TTTATATGTAAGAGAGTTTGTATACAATGAAATAGTATATGTGTAACAGGTTGCTGCTTGGAAAGACAAGGATGGGGATTGGTATGAAACAGG	TTTATATGTAAGAGAGTTTGTATACAATGAAATAGTATATGTGTAACAGGTTGATGCTCGGAAAGACGAGGATGGGGATTGGTATGAAACAGG	93	2	Sub	N/A
1543	TTTATATGTAAGAGAGTTTGTATACAATGAAATAGTATATGTGTAACAGGTTGCTGCTTGGAAAGACAAGGATGGGGATTGGTATGAAACAGG	TTTATATGTAAGAGAGTTTGTATACAATGAAATAGTATATGTGTAACAGGTTGCTGCCTGGAAAGACAAGGAGGGGGATTGGTATGAAACAGG	93	2	Sub	N/A
1544	TTTATATGTAAGAGAGTTTGTATACAATGAAATAGTATATGTGTAACAGGTTGCTGCTTGGAAAGACAAGGATGGGGATTGGTATGAAACAGG	TTTATATGTAAGAGAGTTTGTATACAATGAAATAGTATATGTGTAACAGGATGCTGATTGGAAAGACAAGGATGGGGATTGGTATGAAACAGG	93	2	Sub	N/A
1545	TTTATATGTAAGAGAGTTTGTATACAATGAAATAGTATATGTGTAACAGGTTGCTGCTTGGAAAGACAAGGATGGGGATTGGTATGAAACAGG	TTTATATGTAAGAGAGTTTGTATCCAATGAAATAGTATATGTGTAACAGGTTGCTGCTTGGAAAGACAAGGATGGGGATTAGTATGAAACAGG	93	2	Sub	N/A
1546	TTTATATGTAAGAGAGTTTGTATACAATGAAATAGTATATGTGTAACAGGTTGCTGCTTGGAAAGACAAGGATGGGGATTGGTATGAAACAGG	TTTATATGTAAGAGAGTTTGTATACAATGAAATAGTATATGTGTAAAAGGTTGCGGCTTGGAAAGACAAGGATGGGGATTGGTATGAAACAGG	93	2	Sub	N/A
1547	TTTATATGTAAGAGAGTTTGTATACAATGAAATAGTATATGTGTAACAGGTTGCTGCTTGGAAAGACAAGGAT------------------GGGGATTGGTATGAAACAGG	TTTATATGTAAGAGAGTTTGTATACAATGAAATAGTATATGTGTAACAGGTTGCTGCTTGGAAAGACAAGGATGGGGATTGGTATGAGACAGGGGATTGGTATGAAACAGG	111	2	Ins	N/A
1548	TTTATATGTAAGAGAGTTTGTATACAATGAAATAGTATATGTGTAACAGGTTGCTGCTTGGAAAGACAAGGATGGGGATTGGTATGAAACAGG	TTTATATGTAACAGAGTTTGTATATAATGGAATAGTGTATGTGTAACAGGTTGCTGCTTGGAAAGACAAGGATGGGGATTGGTATGAAACAGG	93	2	Sub	N/A
1549	TTTATATGTAAGAGAGTTTGTATACAATGAAATAGTATATGTGTAACAGGTTGCTGCTTGGAAAGACAAGGATGGGGATTGGTATGAAACAGG	TTTATATGTAAGAGAGTTTGTATACAATGAAATAGTATATGTGTAACAGGTTGGTTCTTGGAAAGACAAGGATGGGGATTGGTATGAAACAGG	93	2	Sub	N/A
1550	TTTATATGTAAGAGAGTTTGTATACAATGAAATAGTATATGTGTAACAGGTTGCTGCTTGGAAAGACAAGGATGGGGATTGGTATGAAACAGG	TTTATATGTAAGAGAGTTTGTATACAATGAAATAGTATATGTGTAACAGGTTGCTGCTTGGAAAGACAGAGATGGGGATTGGTATGAAACAGG	93	2	Sub	N/A
1551	TTTATATGTAAGAGAGTTTGTATACAATGAAATAGTATATGTGTAACAGGTTGCTGCTTGGAAAGACAAGGATGGGGATTGGTATGAAACAGG	TTTATATGTAAGAGAGTTTGTATACAATGAAATAGTATATGTGTAATAGGTTGCTGCTTGGAAAGACTTGGATGGGGATTCGTATGAAACAGG	93	2	Sub	N/A
1552	TTTATATGTAAGAGAGTTTGTATACAATGAAATAGTATATGTGTAACAGGTTGCTGCTTGGAAAGACAAGGATGGGGATTGGTATGAAACAGG	TTTATATGTAAGAGAGTTTGTATATAATGGAATAGTGTATGTGTAACGGGTTGCTGCTTGGAAAGAAAAGGATGGGGATTGGTATGAAACAGG	93	2	Sub	N/A
1553	TTTATATGTAAGAGAGTTTGTATACAATGAAATAGTATATGTGTAACAGGTTGCTGCTTGGAAAGACAAGGATGGGGATTGGTATGAAACAGG	TTTATATGTAAGAGAGTTTGTATACAATGAAATAGTATATGTGTAACAGGGTGCTGATTGGAAAGACAAGGATGGGGATTGGTATGAAACAGG	93	2	Sub	N/A
1554	TTTATATGTAAGAGAGTTTGTATACAATGAAATAGTATATGTGTAACAGGTTGCTGCTTGGAAAGACAAGGATGGGGATTGGTATGAAACAGG	TTTATATGTAAGAGAGTTTGTATACAATGAAATAGTATATGTGTAACAGGTTGCTGATTGGAAAGACAAGGACGGGGATTGGTATGAAACAGG	93	2	Sub	N/A
1555	TTTATATGTAAGAGAGTTTGTATACAATGAAATAGTATATGTGTAACAGGTTGCTGCTTGGAAAGACAAGGATGGGGATTGGTATGAAACAGG	TTTATATGTAAGAGAGTTTGTATACAATGAAATAGTATATGTGTAAGAGGTTGCTGCTTGGAAAGACAAGGATGGGGATTGGGATGAAACAGG	93	2	Sub	N/A
1556	TTTATATGTAAGAGAGTTTGTATACAATGAAATAGTATATGTGTAACAGGTTGCTGCTTGGAAAGACAAGGATGGGGATTGGTATGAAACAGG	TTTATATGTAAGAGAGTTTGTATACAATGAAATAGTATATGTGTAAAAGGTTGCTGCTTGGAAAGACAAGGATGAGGATTGGTATGAAACAGG	93	2	Sub	N/A
1557	TTTATATGTAAGAGAGTTTGTATACAATGAAATAGTATATGTGTAACAGGTTGCTGCTTGGAAAGACAAGGATGGGGATTGGTATGAAACAGG	TTTATATGTAAGAGAGTTTGTATACAATGAAATAGTATATGTGTAACAGGTTGCTGCTTGGAAAGAGGAGGATGGGGATTGGTATGACACAGG	93	2	Sub	N/A
1558	TTTATATGTAAGAGAGTTTGTATACAATGAAATAGTATATGTGTAACAGGTTGCTGCTTGGAAAGACAAGGATGGGGATTGGTATGAAACAGG	TTTATATGTAAGAGAGTTTGTATACAATGAAATAGTATATGTGTAACCGGTTGCTGATTGGAAAGACAAGGATGGGGATTGGTATGAAACAGG	93	2	Sub	N/A
1559	TTTATATGTAAGAGAGTTTGTATACAATGAAATAGTATATGTGTAACAGGTTGCTGCTTGGAAAGACAAGGATGGGGATTGGTATGAAACAGG	TTTATATGTAAGAGAGTTTGTATACCATGAAATAGTATATGTGTAACAGGTTGCTGCTTGGAAAGACCAGGATGGGGATTGGTATGAAACAGG	93	2	Sub	N/A
1560	TTTATATGTAAGAGAGTTTGTATAC----------AATGAAATAGTATATGTGTAACAGGTTGCTGCTTGGAAAGACAAGGATGGGGATTGGTATGAAACAGG	TTTATATGTAAGAGAGTTTGTATACAATGAAATAGAATGAAATAGTATATGTGTAACAGGTTGCTGCTTGGAAAGACAAGGATGGGGATTGGTATGAAACAGG	103	2	Ins	N/A
1561	TTTATATGTAAGAGAGTTTGTATACAATGAAATAGTATATGTGTAACAGGTTGCTGCTTGGAAAGACAAGGATGGGGATTGGTATGAAACAGG	TTTATATGTAAGAGAGTTTGTATACAATGAAATAGTATATGTGTAACAGGTGGAGGCTTGGAAAGACAAGGATGGGGATTGGTATGAAACAGG	93	2	Sub	N/A
1562	TTTATATGTAAGAGAGTTTGTATACAATGAAATAGTATATGTGTAACAGGTTGCTGCTTGGAAAGACAAGGATGGGGATTGGTATGAAACAGG	TTTATATGTAAGAGACTTTGTATACAATGAAATAGTATATGTGTAACAGGTTGCTGCTTGGAAAGACAACGATGGGGATTGGTATGAAACAGG	93	2	Sub	N/A
1563	TTTATATGTAAGAGAGTTTGTATACAATGAAATAGTATATGTGTAACAGGTTGCTGCTTGGAAAGACAAGGATGGGGATTGGTATGAAACAGG	TTTATATGTAAGAGAGTTTGTATACAATGAAATAGTATATGTGTAACAGGTTGCTGCTTGGAAAGACTTGGATGGGGGTTGGTATGAAACAGG	93	2	Sub	N/A
1564	TTTATATGTAAGAGAGTTTGTATACAATGAAATAGTATATGTGTAACAGGTTGCTGCTTGGAAAGACAAGGATGGGGATTGGTATGAAACAGG	TTTATATGTAAGAGAGTTTGTATATAATGAAACAGTGTATGTGTAACAGGTTGCTGCTTGGAAAGAC----ATGGGGATTGGTCTGAAACAGG	89	2	del	N/A
1565	TTTATATGTAAGAGAGTTTGTATACAATGAAATAGTATATGTGTAACAGGTTGCTGCTTGGAAAGACAAGGATGGGGATTGGTATGAAACAGG	TTTATATGTAAGAGAGTTTGTATACAATGAAATAGTATATGTGTAACAGGTTGCTGCTTGGAAAGAGTTGGATGGGGATTGGTATGAAACAGG	93	2	Sub	N/A
1566	TTTATATGTAAGAGAGTTTGTATACAATGAAATAGTATATGTGTAACAGGTTGCTGCTTGGAAAGACAAGGATGGGGATTGGTATGAAACAGG	TTTATATGTAAGAGAGTTTGTATATAATGAAATAGTATATGTGTAACGGGTTGCTGCTTGGAAAGACAAGGATGGGGATTGGTATGAAACAGG	93	2	Sub	N/A
1567	TTTATATGTAAGAGAGTTTGTATACAATGAAATAGTATATGTGTAACAGGTTGCTGCTTGGAAAGACAAGGATGGGGATTGGTATGAAACAGG	TTTATATGTAAGAGAGTTTGTATACAATGAAATAGTATATGTGTAACAGGTTGCTGCTTGGAAAGAAAAGGATGGGGATTGGTATGAAACCGG	93	2	Sub	N/A
1568	TTTATATGTAAGAGAGTTTGTATACAATGAAATAGTATATGTGTAACAGGTTGCTGCTTGGAAAGACAAGGATGGGGATTGGTATGAAACAGG	TTTATATGTAAGAGAGGTTGTATACAATGAAATAGTATATGTGTAACAGGTTGCTGCTTGGAAAGACAAGGATGGGGATTGGTATGACACAGG	93	2	Sub	N/A
1569	TTTATATGTAAGAGAGTTTGTATACAATGAAATAGTATATGTGTAACAGGTTGCTGCTTGGAAAGACAAGGAT------------------GGGGATTGGTATGAAACAGG	TTTATATGTAAGAGAGTTTGTATACAATGAAATAGTATATGTGTAACAGGTTGCTGCTTGGAAAGACAAGGATGGGGAGTGGTATGAAGCAGGGGATTGGTATGAAACAGG	111	2	Ins	N/A
1570	TTTATATGTAAGAGAGTTTGTATACAATGAAATAGTATATGTGTAACAGGTTGCTGCTTGGAAAGACAAGGATGGGGATTGGTATGAAACAGG	TTTATATGTAAGAGAGTTTGTATACAATGAAATAGTATATGTGTAACTGGTTGGGGGTTGGAAAGATTTGGATGGGGGTTGGTATGAGACAGG	93	2	Sub	N/A
1571	TTTATATGTAAGAGAGTTTGTATACAATGAAATAGTATATGTGTAACAGGTTGCTGCTTGGAAAGACAAGGATGGGGATTGGTATGAAACAGG	TTTATATGTAAGAGAGTTTGTATACAATGAAATAGTATATGTGTAACAGGTTGCTGCTTGGAAAGACAAGAATGGGGATTAGTATGAAACAGG	93	2	Sub	N/A
1572	TTTATATGTAAGAGAGTTTGTATACAATGAAATAGTATATGTGTAACAGGTTGCTGCTTGGAAAGACAAGGATGGGGATTGGTATGAAACAGG	TTTATATGTAAGAGAGTTTGTATACAATGAAATAGTATATGTGTAACAGGTTGCTGCTTGGAAAGAC----ATGGGGGTTGGTATGAAACAGG	89	2	del	N/A
1573	TTTATATGTAAGAGAGTTTGTATACAATGAAATAGTATATGTGTAACAGGTTGCTGCTTGGAAAGACAAGGATGGGGATTGGTATGAAACAGG	TTTATATGTAAGAGAGTTTGTATACAATGAAATAGTATATGTGTAATAGGTTGCTGCTGGGAAAGACAAGGATGGGGATTCGTATGAAACAGG	93	2	Sub	N/A
1574	TTTATATGTAAGAGAGTTTGTATACAATGAAATAGTATATGTGTAACAGGTTGCTGCTTGGAAAGACAAGGATGGGGATTGGTATGAAACAGG	TTTATATGTAAGAGAGTTTGTATACAATGAAATAGTATATGTGTAACAGGTTGCTGCTTGGAAAGACGAGGATGGGGCTAGGTATGAAACAGG	93	2	Sub	N/A
1575	TTTATATGTAAGAGAGTTTGTATACAATGAAATAGTATATGTGTAACAGGTTGCTGCTTGGAAAGACAAGGATGGGGATTGGTATGAAACAGG	TTTATATGTAAGAGAGTTTGTATACAATGAAATAGTATATGTGTAATAGGTTGCTGCTTGGAAAGAGAAGGATGGGGATTTGTATGAAACAGG	93	2	Sub	N/A
1576	TTTATATGTAAGAGAGTTTGTATACAATGAAATAGTATATGTGTAACAGGTTGCTGCTTGGAAAGACAAGGATGGGGATTGGTATGAAACAGG	TTTATATGTAAGAGAGTTTGTATACAATGAAATAGTATATGTGTAATAGGTTGCTGCTTGGAAAGAACAGGATGGGGATTCGTATGAAACAGG	93	2	Sub	N/A
1577	TTTATATGTAAGAGAGTTTGTATACAATGAAATAGTATATGTGTAACAGGTTGCTGCTTGGAAAGACAAGGATGGGGATTGGTATGAAACAGG	TTTATATGTAAGAGAGTTTGTATATAATGAAACAGAGTATGTGTAACAGGTTGCTGCTTGGAAAGAC----ATGGGGATTGGTATGAAACAGG	89	2	del	N/A
1578	TTTATATGTAAGAGAGTTTGTATACAATGAAATAGTATATGTGTAACAGGTTGCTGCTTGGAAAGACAAGGATGGGGATTGGTATGAAACAGG	TTTATATGTAAGAGAGTTTGTATACAATGAAATAGTATAT---AAACAGGTTGCTGCTTGGAAAGACAAGGATGGGGATTGGTATGAAACAGG	90	2	del	N/A
1579	TTTATATGTAAGAGAGTTTGTATACAATGAAATAGTATATGTGTAACAGGTTGCTGCTTGGAAAGACAAGGATGGGGATTGGTATGAAACAGG	TTTATATGTAAGAGAGTTTGTATACAATGAAATATTATATGTGTTATA-GTTGCTGCTTGGAAAGACAAGGATGGGGATTGGTATGAAACAGG	92	2	del	N/A
1580	TTTATATGTAAGAGAGTTTGTATACAATGAAATAGTATATGTGTAACAGGTTGCTGCTTGGAAAGACAAGGATGGGGATTGGTATGAAACAGG	TTTATATGTAAGAGAGTTTGTATACAATGAAATAGTATATGTGTAACAGGTTGCTGCTTGGAAAGAC----ATGGGGATTGGTATGTAACAGG	89	2	del	N/A
1581	TTTATATGTAAGAGAGTTTGTATACAATGAAATAGTATATGTGTAACAGGTTGCTGCTTGGAAAGACAAGGATGGGGATTGGTATGAAACAGG	TTTATATGTAAGAGAGTCTGTATACAATGAAATAGTATATGTGTAACAGGTTGCTGCTTGGAAAGAC----ATGGGGATTGGTATGAAACAGG	89	2	del	N/A
1582	TTTATATGTAAGAGAGTTTGTATACAATGAAATAGTATATGTGTAACAGGTTGCTGCTTGGAAAGACAAGGATGGGGATTGGTATGAAACAGG	TTTATATGTAAGAGAGTTTGTATACAATGAAACAGTGTATGTGTAACAGGTTGCTGCTTGGAAAGAC----ATGGGGATTTGTATGAAACAGG	89	2	del	N/A
1583	TTTATATGTAAGAGAGTTTGTATACAATGAAATAGTATATGTGTAACAGGTTGCTGCTTGGAAAGACAAGGATGGGGATTGGTATGAAACAGG	TTTATATGTAAGAGAGTTTGTATACAATGAAATAGCATATGTGTAACAGGTTGCTGCTTGGAAAGAC----ATGGGGATTGGTATGAAACAGG	89	2	del	N/A
1584	TTTATATGTAAGAGAGTTTGTATACAATGAAATAGTATATGTGTAACAGGTTGCTGCTTGGAAAGACAAGGATGGGGATTGGTATGAAACAGG	TTTATATGTAAGAGAGTTTGTATACAATGAAATAGTATATGTGTAATAGGTTGCTGCTTGGAAAGAC----ATGGGGATTTGTATGAAACAGG	89	2	del	N/A
1585	TTTATATGTAAGAGAGTTTGTATACAATGAAATAGTATATGTGTAACAGGTTGCTGCTTGGAAAGACAAGGATGGGGATTGGTATGAAACAGG	TTTATATGTAAGAGAGTTTGTATACAATGAAATAGTATATGTGTAATAGGTTGCTGCTTGGAAAGAC----ATGGGGATTGGTATGAAACACG	89	2	del	N/A
1586	TTTATATGTAAGAGAGTTTGTATACAATGAAATAGTATATGTGTAACAGGTTGCTGCTTGGAAAGACAAGGATGGGGATTGGTATGAAACAGG	TTTATATGTAAGAGAGTTTGTATACAATGAAATAGTATATGTGTAACAGGTTGCTGCTTGGAAATAC----ATGGGGATTGGTATGAAACACG	89	2	del	N/A
1587	TTTATATGTAAGAGAGTTTGTATACAATGAAATAGTATATGTGTAACAGGTTGCTGCTTGGAAAGACAAGGATGGGGATTGGTATGAAACAGG	TTTATATGTAAGAGAGTTTGTATACAATGAAACAGTGTATGTGTAACAGGTTGCTGCTTGGAAACAC----ATGGGGATTGGTATGAAACACG	89	2	del	N/A
1588	TTTATATGTAAGAGAGTTTGTATACAATGAAATAGTATATGTGTAACAGGTTGCTGCTTGGAAAGACAAGGATGGGGATTGGTATGAAACAGG	TTTATATGTAAGAGAGTTTGTATACAATGAAATAGTGTATGTGTAACAGGTTGCTGCTTGGAAACAC----ATGGGGATTGGTATGAAACAGG	89	2	del	N/A
1589	TTTATATGTAAGAGAGTTTGTATACAATGAAATAGTATATGTGTAACAGGTTGCTGCTTGGAAAGACAAGGATGGGGATTGGTATGAAACAGG	TTTATATGTAAGAGAGTTTGTATACAATGAAATAGTATATGTGTAACAGGTGGCTGCTGGGAAAGAC----ATGGGGATTGGTATGAAACAGG	89	2	del	N/A
1590	TTTATATGTAAGAGAGTTTGTATACAATGAAATAGTATATGTGTAACAGGTTGCTGCTTGGAAAGACAAGGATGGGGATTGGTATGAAACAGG	TTTATATGTAAGAGAGTTTGTATACAATGAAATAGTATATGTGT-ACAGGTTGCTGCTTGGAAAGACAAGGATGGGGATTCGTATGAAACAGG	92	2	del	N/A
1591	TTTATATGTAAGAGAGTTTGTATACAATGAAATAGTATATGTGTAACAGGTTGCTGCTTGGAAAGACAAGGATGGGGATTGGTATGAAACAGG	TTTATATGTAAGAGAGTTTGTATACAATGAAATAGTATATGTGTAACAGGTTGCTGCTTGGAAAGAC----ATGGGGCTTCGTATGAAACAGG	89	2	del	N/A
1592	TTTATATGTAAGAGAGTTTGTATACAATGAAATAGTATATGTGTAACAGGTTGCTGCTTGGAAAGACAAGGATGGGGATTGGTATGAAACAGG	TTTATATGTAAGAGAGTTTGTATACAATGAAATAGTATATGTGTTATA-GTTGCTGCTTGGAAAGAAAAGGATGGGGATTGGTATGAAACAGG	92	2	del	N/A
1593	TTTATATGTAAGAGAGTTTGTATACAATGAAATAGTATATGTGTAACAGGTTGCTGCTTGGAAAGACAAGGATGGGGATTGGTATGAAACAGG	TTTATATGTAAGAGAGTGTGTATACAATGAAATAGTATATGTGTAACAGGTTGCTGCTTGGAAAGAC----ATGGGGATTGGTATGAAACAGG	89	2	del	N/A
1594	TTTATATGTAAGAGAGTTTGTATACAATGAAATAGTATATGTGTAACAGGTTGCTGCTTGGAAAGACAAGGATGGGGATTGGTATGAAACAGG	TTTATATGTAAGAGAGTTTGTATACAATGAAATAGTATATGTGTAACAGTTTGCTGCTTGGAAAGAC----ATGGGGATTGGTATGAAACAGG	89	2	del	N/A
1595	TTTATATGTAAGAGAGTTTGTATACAATGAAATAGTATATGTGTAACAGGTTGCTGCTTGGAAAGACAAGGATGGGGATTGGTATGAAACAGG	TTTATATGTAAGAGAGTTTGTATACAATGTAATAGTATATGTGTAACAGGTTGCTGCTTGGAAAGAC----ATGGGGATTGGTATGAAACAGG	89	2	del	N/A
1596	TTTATATGTAAGAGAGTTTGTATACAATGAAATAGTATATGTGTAACAGGTTGCTGCTTGGAAAGACAAGGATGGGGATTGGTATGAAACAGG	TTTATATGTAAGAGAGTTTGTATACAATGACATAGTATATGTGTAACAGGTTGCTGCTTGGAAAGAC----ATGGGGATTGGTATGAAACAGG	89	2	del	N/A
1597	TTTATATGTAAGAGAGTTTGTATACAATGAAATAGTATATGTGTAACAGGTTGCTGCTTGGAAAGACAAGGATGGGGATTGGTATGAAACAGG	TTTATATGTAAGAGAGTTTGTATACAATGAAATAGTGTATGTGTAACAGGTTGCTGCTGGGAAAGAC----ATGGGGATTGGTATGAAACAGG	89	2	del	N/A
1598	TTTATATGTAAGAGAGTTTGTATACAATGAAATAGTATATGTGTAACAGGTTGCTGCTTGGAAAGACAAGGATGGGGATTGGTATGAAACAGG	TTTATATGTAAGAGAGTTTGTATATAATGAAACAGTGTATGTGTAACAGGTTGCTGCATGGAAAGAC----ATGGGGATTGGTATGAAACAGG	89	2	del	N/A
1599	TTTATATGTAAGAGAGTTTGTATACAATGAAATAGTATATGTGTAACAGGTTGCTGCTTGGAAAGACAAGGAT------------------GGGGATTGGTATGAAACAGG	TTTATATGTAAGAGAGTTTGTATACAATGAAATAGTATATGTGTAACAGGTTGCTGCTTGGAAAGACAAGGATGGGGATTGGTATCAAACAGGGGATTGGTATGAAACAGG	111	2	Ins	N/A
1600	TTTATATGTAAGAGAGTTTGTATACAATGAAATAGTATATGTGTAACAGGTTGCTGCTTGGAAAGACAAGGATGGGGATTGGTATGAAACAGG	TTTATATGTAAGAGAGTTTGTATATAATGAAACAGTGTATGTGTAACAGGTTGCTGCTTGGAAAGAC----ATGGGGATTGGCATGAAACAGG	89	2	del	N/A
1601	TTTATATGTAAGAGAGTTTGTATACAATGAAATAGTATATGTGTAACAGGTTGCTGCTTGGAAAGACAAGGATGGGGATTGGTATGAAACAGG	TTTATATGTAAGAGAGTTTGTATATAATGAAACAGTGTATGTGTAACAGGTTGCTGCTTGGCAAGAC----ATGGGGATTGGTATGAAACAGG	89	2	del	N/A
1602	TTTATATGTAAGAGAGTTTGTATACAATGAAATAGTATATGTGTAACAGGTTGCTGCTTGGAAAGACAAGGATGGGGATTGGTATGAAACAGG	TTTATATGTAAGAGAGTTTGTATACAATGAAATAGTATATGTGTAACAGGTTGCAGCTTGGAAAGACAAGGATGGGGATTCGTATGAAACAGG	93	2	Sub	N/A
1603	TTTATATGTAAGAGAGTTTGTATACAATGAAATAGTATATGTGTAACAGGTTGCTGCTTGGAAAGACAAGGATGGGGATTGGTATGAAACAGG	TTTATATGTAAGAGAGTTTGTATACAATGAAATAGTATATGTGTAACAGGTTGCCGCTTGGAAAGGCAAGGATGGGGATTGGTATGAAACAGG	93	2	Sub	N/A
1604	TTTATATGTAAGAGAGTTTGTATACAATGAAATAGTATATGTGTAACAGGTTGCTGCTTGGAAAGACAAGGATGGGGATTGGTATGAAACAGG	TTTATATGTAAGAGAGTTTGTATACAATGAAATAGTATATGTGTAACAGGTTGCCGCTTGGGAAGGCAAGGATGGGGATTGGTATGAAACAGG	93	2	Sub	N/A
1605	TTTATATGTAAGAGAGTTTGTATACAATGAAATAGTATATGTGTAACAGGTTGCTGCTTGGAAAGACAAGGATGGGGATTGGTATGAAACAGG	TTTATATGTAAGAGAGTTTGTATACAATGAAATAGTATATGTGTAATAGGTTGCTGCTTGGGAAGACAAGGATGGGGATTAGTATGAAACAGG	93	2	Sub	N/A
1606	TTTATATGTAAGAGAGTTTGTATACAATGAAATAGTATATGTGTAACAGGTTGCTGCTTGGAAAGACAAGGATGGGGATTGGTATGAAACAGG	TTTATATGTAAGAGAGTTTGTATACAATGAAATAGTATATGTGTAACAGGTTGCCGCTTGGGAAGACAAGGATGGGGACTGGTATGAAACAGG	93	2	Sub	N/A
1607	TTTATATGTAAGAGAGTTTGTATACAATGAAATAGTATATGTGTAACAGGTTGCTGCTTGGAAAGACAAGGATGGGGATTGGTATGAAACAGG	TTTATATGTAAGAGAGTTTGTATACAATGAAATAGTATATGTGTAACAGGTTGCTGCTTGGTAAGACAAGGATGGGGATTGGTATGAAACAGA	93	2	Sub	N/A
1608	TTTATATGTAAGAGAGTTTGTATACAATGAAATAGTATATGTGTAACAGGTTGCTGCTTGGAAAGACAAGGATGGGGATTGGTATGAAACAGG	TTTATATGTAAGAGAGTTTGTATACAATGAAATAGTATATGTGTAACAGGTTGCAGCTTGGCAAGTCAAGGATGGGGACTGGTATGAAACAGG	93	2	Sub	N/A
1609	TTTATATGTAAGAGAGTTTGTATACAATGAAATAGTATATGTGTAACAGGTTGCTGCTTGGAAAGACAAGGATGGGGATTGGTATGAAACAGG	TTTATATGTAAGAGAGTTTGTATACAATGAAATAGTATATGTGTAACAGGTTGCAGCTTGGCAAGGCAAGGATGGGGACTGGTATGAAACAGG	93	2	Sub	N/A
1610	TTTATATGTAAGAGAGTTTGTATACAATGAAATAGTATATGTGTAACAGGTTGCTGCTTGGAAAGACAAGGATGGGGATTGGTATGAAACAGG	TTTATATGTAAGAGAGTTTGTATACAATGAAATAGTATATGTGTAACAGGTTGCAGCTTGGGAAGTCAAGGATGGGGACTGGTATGAAACAGG	93	2	Sub	N/A
1611	TTTATATGTAAGAGAGTTTGTATACAATGAAATAGTATATGTGTAACAGGTTGCTGCTTGGAAAGACAAGGATGGGGATTGGTATGAAACAGG	TTTATATGTAAGAGAGTTTGTATACAATGAAATAGTATATGTGTAACAGGTTGCGGCTTGGTAAGGCAAGGATGGGGATTGGTATGAAACAGG	93	2	Sub	N/A
1612	TTTATATGTAAGAGAGTTTGTATACAATGAAATAGTATATGTGTAACAGGTTGCTGCTTGGAAAGACAAGGATGGGGATTGGTATGAAACAGG	TTTATATGTAAGAGAGTTTGTATACAATGAAATAGTATATGTGTAACAGGTTGCGGCTTGGAAAGGCAAGGATGGGGATTGGTATGAAACAGG	93	2	Sub	N/A
1613	TTTATATGTAAGAGAGTTTGTATACAATGAAATAGTATATGTGTAACAGGTTGCTGCTTGGAAAGACAAGGATGGGGATTGGTATGAAACAGG	TTTATATGTAAGAGAGTTTGTATACAATGAAATAGTATATGTGTAACAGGTTGCTGCTTGGTAAGTCAAGGATGGGGACTGGTATGAAACAGG	93	2	Sub	N/A
1614	TTTATATGTAAGAGAGTTTGTATACAATGAAATAGTATATGTGTAACAGGTTGCTGCTTGGAAAGACAAGGATGGGGATTGGTATGAAACAGG	TTTATATGTAAGAGAGTTTGTATACAATGAAATAGTATATGTGTAACAGGTTGCTGCTTGGGAAGTCAAGGATGGGGACTGGTATGAAACAGG	93	2	Sub	N/A
1615	TTTATATGTAAGAGAGTTTGTATACAATGAAATAGTATATGTGTAACAGGTTGCTGCTTGGAAAGACAAGGATGGGGATTGGTATGAAACAGG	TTTATATGTAAGAGAGTTTGTATACAATGAAATAGTATATGTGTAACAGGTTGCTGCTTGGTAAGTCAAGGATGGGGATTGGTATGAAACAGG	93	2	Sub	N/A
1616	TTTATATGTAAGAGAGTTTGTATACAATGAAATAGTATATGTGTAACAGGTTGCTGCTTGGAAAGACAAGGATGGGGATTGGTATGAAACAGG	TTTATATGTAAGAGAGTTTGTATACAATGAAATAGTATATGTGTAATAGGTTGCGGCTTGGCAAGACAAGGATGGGGATTGGTATGAAACAGG	93	2	Sub	N/A
1617	TTTATATGTAAGAGAGTTTGTATACAATGAAATAGTATATGTGTAACAGGTTGCTGCTTGGAAAGACAAGGATGGGGATTGGTATGAAACAGG	TTTATATGTAAGAGAGTTTGTATACAATGAAATAGTATATGTGTAACAGGTTGCGGCTTGGAAAGCCAAGGATGGGGACTGGTATGAAACAGG	93	2	Sub	N/A
1618	TTTATATGTAAGAGAGTTTGTATACAATGAAATAGTATATGTGTAACAGGTTGCTGCTTGGAAAGACAAGGATGGGGATTGGTATGAAACAGG	TTTATATGTAAGAGAGTTTGTATACAATGAAATAGTATATGTGTAACAGGTTTCTGCTTGGCAAGACAAGGATGGGGATTGGTATGAAACAGG	93	2	Sub	N/A
1619	TTTATATGTAAGAGAGTTTGTATACAATGAAATAGTATATGTGTAACAGGTTGCTGCTTGGAAAGACAAGGATGGGGATTGGTATGAAACAGG	TTTATATGTAAGAGAGTTTGTATACAATGAAATAGTATATGTGTAACAGGTTGCGGCTTGGTAAGCCAAGGATGGGGAATGGTATGAAACAGG	93	2	Sub	N/A
1620	TTTATATGTAAGAGAGTTTGTATACAATGAAATAGTATATGTGTAACAGGTTGCTGCTTGGAAAGACAAGGATGGGGATTGGTATGAAACAGG	TTTATATGTAAGAGAGTTTGTATACAATGAAATAGTATATGTGTAACAGGTTGCGGCTTGGTAAGTCAAGGATGGGGATTGGTATGAAACAGG	93	2	Sub	N/A
1621	TTTATATGTAAGAGAGTTTGTATACAATGAAATAGTATATGTGTAACAGGTTGCTGCTTGGAAAGACAAGGATGGGGATTGGTATGAAACAGG	TTTATATGTAAGAGAGTTTGTATACAATGAAATAGTATATGTGTAACAGGTTGCGGCTTGGCAAGAAAAGGATGGGGATTGGTATGAAACAGG	93	2	Sub	N/A
1622	TTTATATGTAAGAGAGTTTGTATACAATGAAATAGTATATGTGTAACAGGTTGCTGCTTGGAAAGACAAGGATGGGGATTGGTATGAAACAGG	TTTATATGTAAGAGAGTTTGTATACAATGAAATAGTATATGTGTAACAGGTTGCGGCTTGGGAAGCCAAGGATGGGGAGTGGTATGAAACAGG	93	2	Sub	N/A
1623	TTTATATGTAAGAGAGTTTGTATACAATGAAATAGTATATGTGTAACAGGTTGCTGCTTGGAAAGACAAGGATGGGGATTGGTATGAAACAGG	TTTATATGTAAGAGAGTTTGTATACAATGAAATAGTATATGTGTAACAGGTTGCAGCTTGGGAAGCCAAGGATGGGGACTGGTATGAAACAGG	93	2	Sub	N/A
1624	TTTATATGTAAGAGAGTTTGTATACAATGAAATAGTATATGTGTAACAGGTTGCTGCTTGGAAAGACAAGGATGGGGATTGGTATGAAACAGG	TTTATATGTAAGAGAGTTTGTATACAATGAAATAGTATATGTGTAACAGGTTGCGGCTTGGCAAGCCAAGGATGGGGAATGGTATGAAACAGG	93	2	Sub	N/A
1625	TTTATATGTAAGAGAGTTTGTATACAATGAAATAGTATATGTGTAACAGGTTGCTGCTTGGAAAGACAAGGATGGGGATTGGTATGAAACAGG	TTTATATGTAAGAGAGTTTGTATACAATGAAATAGTATATGTGTAACAGGTTGCGGCTTGGGAAGCCAAGGATGGGGATTGGTATGAAACAGG	93	2	Sub	N/A
1626	TTTATATGTAAGAGAGTTTGTATACAATGAAATAGTATATGTGTAACAGGTTGCTGCTTGGAAAGACAAGGATGGGGATTGGTATGAAACAGG	TTTATATGTAAGAGAGTTTGTATACAATGAAATAGTATATGTGTAACAGGTTGCGGCTTGGTAAGTCAAGGATGGGGAATGGTATGAAACAGG	93	2	Sub	N/A
1627	TTTATATGTAAGAGAGTTTGTATACAATGAAATAGTATATGTGTAACAGGTTGCTGCTTGGAAAGACAAGGATGGGGATTGGTATGAAACAGG	TTTATATGTAAGAGAGTTTGTATACAATGAAATAGTATATGTGTAACAGGTTGCTGCTTGGTAAGGCAAGGATGGGGAATGGTATGAAACAGG	93	2	Sub	N/A
1628	TTTATATGTAAGAGAGTTTGTATACAATGAAATAGTATATGTGTAACAGGTTGCTGCTTGGAAAGACAAGGATGGGGATTGGTATGAAACAGG	TTTATATGTAAGAGAGTTTGTATACAATGAAATAGTATATGTGTAACAGGTTGCAGCTTGGCAAGCCAAGGATGGGGACTGGTATGAAACAGG	93	2	Sub	N/A
1629	TTTATATGTAAGAGAGTTTGTATACAATGAAATAGTATATGTGTAACAGGTTGCTGCTTGGAAAGACAAGGATGGGGATTGGTATGAAACAGG	TTTATATGTAAGAGAGTTTGTATACAATGAAATAGTATATGTGTAACAGGTTGCTGCTTGGTAAGACGAGGATGGGGATTGGTATGAAACAGG	93	2	Sub	N/A
1630	TTTATATGTAAGAGAGTTTGTATACAATGAAATAGTATATGTGTAACAGGTTGCTGCTTGGAAAGACAAGGATGGGGATTGGTATGAAACAGG	TTTATATGTAAGAGAGTTTGTATACAATGAAATAGTATATGTGTAACAGGTTGCAGCTTGGTAAGTCAAGGATGGGGACTGGTATGAAACAGG	93	2	Sub	N/A
1631	TTTATATGTAAGAGAGTTTGTATACAATGAAATAGTATATGTGTAACAGGTTGCTGCTTGGAAAGACAAGGATGGGGATTGGTATGAAACAGG	TTTATATGTAAGAGAGTTTGTATACAATGAAATAGTATATGTGTAACAGGTTGCAGCTTGGCAAGTCAAGGATGGGGAGTGGTATGAAACAGG	93	2	Sub	N/A
1632	TTTATATGTAAGAGAGTTTGTATACAATGAAATAGTATATGTGTAACAGGTTGCTGCTTGGAAAGACAAGGATGGGGATTGGTATGAAACAGG	TTTATATGTAAGAGAGTTTGTATACAATGAAATAGTATATGTGTAACAGGTTGCCGCTTGGCAAGCCAAGGATGGGGACTGGTATGAAACAGG	93	2	Sub	N/A
1633	TTTATATGTAAGAGAGTTTGTATACAATGAAATAGTATATGTGTAACAGGTTGCTGCTTGGAAAGACAAGGATGGGGATTGGTATGAAACAGG	TTTATATGTAAGAGAGTTTGTATACAATGAAATAGTATATGTGTAACAGGTTGCTGCTTGGCAAGTCAAGGATGGGGACTGGTATGAAACAGG	93	2	Sub	N/A
1634	TTTATATGTAAGAGAGTTTGTATACAATGAAATAGTATATGTGTAACAGGTTGCTGCTTGGAAAGACAAGGATGGGGATTGGTATGAAACAGG	TTTATATGTAAGAGAGTTTGTATACAATGAAATAGTATATGTGTAACAGGTTGCTGCTTGGTAAGCCAAGGATGGGGACTGGTATGAAACAGG	93	2	Sub	N/A
1635	TTTATATGTAAGAGAGTTTGTATACAATGAAATAGTATATGTGTAACAGGTTGCTGCTTGGAAAGACAAGGATGGGGATTGGTATGAAACAGG	TTTATATGTAAGAGAGTTTGTATACAATGAAATAGTATATGTGTAATAGGTTGCTGCTTGGGAAGACAAGGATGGGGAATGGTATGAAACAGG	93	2	Sub	N/A
1636	TTTATATGTAAGAGAGTTTGTATACAATGAAATAGTATATGTGTAACAGGTTGCTGCTTGGAAAGACAAGGATGGGGATTGGTATGAAACAGG	TTTATATGTAAGAGAGTTTGTATACAATGAAATAGTATATGTGTAACAGGTTGCGGCTTGGCAAGCCAAGGATGGGGACTGGTATGAAACAGG	93	2	Sub	N/A
1637	TTTATATGTAAGAGAGTTTGTATACAATGAAATAGTATATGTGTAACAGGTTGCTGCTTGGAAAGACAAGGATGGGGATTGGTATGAAACAGG	TTTATATGTAAGAGAGTTTGTATACAATGAAATAGTATATGTGTAACGGGTTGCTGCTTGGAAGGGCAAGGATGGGGATTGGTATGAAACAGG	93	2	Sub	N/A
1638	TTTATATGTAAGAGAGTTTGTATACAATGAAATAGTATATGTGTAACAGGTTGCTGCTTGGAAAGACAAGGATGGGGATTGGTATGAAACAGG	TTTATATGTAAGAGAGTTTGTATACAATGAAATAGTATATGTGTAACAGGTTGCTGCTTGGCAAGGCAAGGATGGGGAATGGTATGAAACAGG	93	2	Sub	N/A
1639	TTTATATGTAAGAGAGTTTGTATACAATGAAATAGTATATGTGTAACAGGTTGCTGCTTGGAAAGACAAGGATGGGGATTGGTATGAAACAGG	TTTATATGTAAGAGAGTTTGTATACAATGAAATAGTATATGTGTAACAGGTTGCAGCTTGGCAAGACAAGGATGGGGAATGGTATGAAACAGG	93	2	Sub	N/A
1640	TTTATATGTAAGAGAGTTTGTATACAATGAAATAGTATATGTGTAACAGGTTGCTGCTTGGAAAGACAAGGATGGGGATTGGTATGAAACAGG	TTTATATGTCAGAGAGTTTGTATACAATGAAATAGTATATGTGTAACAGGTTGCTGCTTGGTAAGACAAGGATGGGGATTGGTATGAAACAGG	93	2	Sub	N/A
1641	TTTATATGTAAGAGAGTTTGTATACAATGAAATAGTATATGTGTAACAGGTTGCTGCTTGGAAAGACAAGGATGGGGATTGGTATGAAACAGG	TTTATATGTAAGAGAGTTTGTATACAATGAAATAGTATATGTGTAATAGGTTGCTGCTTGGCAAGACAAGGATGGGGATTAGTATGAAACAGG	93	2	Sub	N/A
1642	TTTATATGTAAGAGAGTTTGTATACAATGAAATAGTATATGTGTAACAGGTTGCTGCTTGGAAAGACAAGGATGGGGATTGGTATGAAACAGG	TTTATATGTAAGAGAGTTTGTATACAATGAAATAGTATATGTGTAATAGGTTGCGGCTTGGTAAGACAAGGATGGGGATTGGTATGAAACAGG	93	2	Sub	N/A
1643	TTTATATGTAAGAGAGTTTGTATACAATGAAATAGTATATGTGTAACAGGTTGCTGCTTGGAAAGACAAGGATGGGGATTGGTATGAAACAGG	TTTATATGTAAGAGAGTTTGTATACAATGAAATAGTATATGTGTAACAGGTTGCTGCTTGGTAAGACAAGGATGGGGATTGGTATGAAACATG	93	2	Sub	N/A
1644	TTTATATGTAAGAGAGTTTGTATACAATGAAATAGTATATGTGTAACAGGTTGCTGCTTGGAAAGACAAGGATGGGGATTGGTATGAAACAGG	TTTATATGTAAGAGAGTTTGTATACAATGAAATAGTATATGTGTAACAGGTTTCTGCTTGGCAAGACAAGGATGGGGATTAGTATGAAACAGG	93	2	Sub	N/A
1645	TTTATATGTAAGAGAGTTTGTATACAATGAAATAGTATATGTGTAACAGGTTGCTGCTTGGAAAGACAAGGATGGGGATTGGTATGAAACAGG	TTTATATGTAAGAGAGTTTGTATACAATGAAATAGTATATGTGTAACGGGTTGCTGCTTGGAAAGACGAGGATGGGGATTTGTATGAAACAGG	93	2	Sub	N/A
1646	TTTATATGTAAGAGAGTTTGTATACAATGAAATAGTATATGTGTAACAGGTTGCTGCTTGGAAAGACAAGGATGGGGATTGGTATGAAACAGG	TTTATATGTAAGAGAGTTTGTATACAATGAAATAGTATATGTGTAACAGGTTGCTGCTTGGCAAGACAAGGATGGGGATTGGTCTGAAACAGG	93	2	Sub	N/A
1647	TTTATATGTAAGAGAGTTTGTATACAATGAAATAGTATATGTGTAACAGGTTGCTGCTTGGAAAGACAAGGATGGGGATTGGTATGAAACAGG	TTTATATGTAAGAGAGTTTGTATACAATGAAATAGTATATGTGTAACAGGTTGCTGCTTGGCAAGAGAAGGATGGGGATTGGTATGAAACAGG	93	2	Sub	N/A
1648	TTTATATGTAAGAGAGTTTGTATACAATGAAATAGTATATGTGTAACAGGTTGCTGCTTGGAAAGACAAGGATGGGGATTGGTATGAAACAGG	TTTATATGTCAGAGAGTTTGTATACAATGAAATAGTATATGTGTAACAGGTTGCTGCTTGGGAAGACAAGGATGGGGATTGGTATGAAACAGG	93	2	Sub	N/A
1649	TTTATATGTAAGAGAGTTTGTATACAATGAAATAGTATATGTGTAACAGGTTGCTGCTTGGAAAGACAAGGATGGGGATTGGTATGAAACAGG	TTTATATGTAAGAGAGTTTGTATACAATGAAATAGTATATGTGTAACAGGTTGCTGCTTGGGAAGACAAAGATGGGGATTGGTATGAAACAGG	93	2	Sub	N/A
1650	TTTATATGTAAGAGAGTTTGTATACAATGAAATAGTATATGTGTAACAGGTTGCTGCTTGGAAAGACAAGGATGGGGATTGGTATGAAACAGG	TTTATATGTAAGAGAGTTTGTATACAATGAAATAGTATATGTGTAACAGGTTGCTGCTTGGGAAGACAAGGATGGGGATTGGTATGAGACAGG	93	2	Sub	N/A
1651	TTTATATGTAAGAGAGTTTGTATACAATGAAATAGT------------------------------------------ATATGTGTAACAGGTTGCTGCTTGGAAAGACAAGGATGGGGATTGGTATGAAACAGG	TTTATATGTAAGAGAGTTTGTATACAATGAAATAGTATATGTGTAACAGGTTGCTGCTTGGAAAGACAAGGAAATAGAATATGTGTAACAGGTTGCTGCTTGGAAAGACAAGGATGGGGATTGGTATGAAACAGG	135	2	Ins	N/A
1652	TTTATATGTAAGAGAGTTTGTATACAATGAAATAGTATATGTGTAACAGGTTGCTGCTTGGAAAGACAAGGATGGGGATTGGTATGAAACAGG	TTTATATGTAAGAGAGTTTGTATACAATGAAATAGTATATGTGTAACAGGTTGCTGCTTGGGAAGACGAGGATGGGGATTGGTATGAAACAGG	93	2	Sub	N/A
1653	TTTATATGTAAGAGAGTTTGTATACAATGAAATAGTATATGTGTAACAGGTTGCTGCTTGGAAAGACAAGGATGGGGATTGGTATGAAACAGG	TTTATATGTAAGAGAGTTTGTATACAATGAAATAGTATATGTGTAATAGGTTGCAGCTTGGGAAGACAAGGATGGGGATTGGTATGAAACAGG	93	2	Sub	N/A
1654	TTTATATGTAAGAGAGTTTGTATACAATGAAATAGTATATGTGTAACAGGTTGCTGCTTGGAAAGACAAGGAT------------------GGGGATTGGTATGAAACAGG	TTTATATGTAAGAGAGTTTGTATACAATGAAATAGTATATGTGTAACAGGTTGCTGCTTGGAAAGACAAGGATGGGGATTGGTATGAAACCGGGGATTGGTATGAAACAGG	111	2	Ins	N/A
1655	TTTATATGTAAGAGAGTTTGTATACAATGAAATAGTATATGTGTAACAGGTTGCTGCTTGGAAAGACAAGGATGGGGATTGGTATGAAACAGG	TTTATAAGTAAGAGAGTTTGTATACAATGAAATAGTATATGTGTAATAGGTTGCTGCTTGGAAAGACAAGGATGGGGATTGGTATGAAACAGG	93	2	Sub	N/A
1656	TTTATATGTAAGAGAGTTTGTATACAATGAAATAGTATATGTGTAACAGGTTGCTGCTTGGAAAGACAAGGATGGGGATTGGTATGAAACAGG	TTTATATGTAAGAGAGTTTGTATACAATGAAATAGTATATGTGTAACAGGATGCTGCTTGGAAAGAC----ATGGGGACTGGTATGAAACAGG	89	2	del	N/A
1657	TTTATATGTAAGAGAGTTTGTATACAATGAAATAGTATATGTGTAACAGGTTGCTGCTTGGAAAGACAAGGATGGGGATTGGTATGAAACAGG	TTTATATGTAAGAGAGTTTGTATACAATGAAATAGTATATGTGTAATAGGTTGCTGCTTGGAAAGACAAAGATGGGGATTTGTATGAAACAGG	93	2	Sub	N/A
1658	TTTATATGTAAGAGAGTTTGTATACAATGAAATAGTATATGTGTAACAGGTTGCTGCTTGGAAAGACAAGGATGGGGATTGGTATGAAACAGG	TTTATATGTAAGAGAGTTTGTATACAATGAAATAGTATATGTGTAATAGGTTGCGGCTTGGAAAGACAAGGATGGGGAATGGTATGAAACAGG	93	2	Sub	N/A
1659	TTTATATGTAAGAGAGTTTGTATACAATGAAATAGTATATGTGTAACAGGTTGCTGCTTGGAAAGACAAGGATGGGGATTGGTATGAAACAGG	TTTATATGTAAGAGAGTTTGTATACAATGAAATAGTATATGTGTAACAGGTTGCAGCTTGGAAAGACAAGGATGGGGATTGGTCTGAAACAGG	93	2	Sub	N/A
1660	TTTATATGTAAGAGAGTTTGTATACAATGAAATAGTATATGTGTAACAGGTTGCTGCTTGGAAAGACAAGGATGGGGATTGGTATGAAACAGG	TTTATATGTAAGAGAGTTTGTATACAATGAAATAGTATATGTGTAATAGGTTGCTGCTTGGAAAGACACGGATGGGGATTGGTATGCAACAGG	93	2	Sub	N/A
1661	TTTATATGTAAGAGAGTTTGTATACAATGAAATAGTATATGTGTAACAGGTTGCTGCTTGGAAAGACAAGGATGGGGATTGGTATGAAACAGG	TTTATATGTAAGAGAGTTTGTATACAATGAACTAGTATATGTGTAACAGGTTGCTGCTTGGAAAGCCAAGGATGGGGATTGGTATGAAACAGG	93	2	Sub	N/A
1662	TTTATATGTAAGAGAGTTTGTATACAATGAAATAGTATATGTGTAACAGGTTGCTGCTTGGAAAGACAAGGATGGGGATTGGTATGAAACAGG	TTTATATGTAAGAGAGTTTGTATACAATGAAATAGTATATGTGTAATAGGTTGCTGCTTGGACAGACAAGGATGGGGATTCGTATGAAACAGG	93	2	Sub	N/A
1663	TTTATATGTAAGAGAGTTTGTATACAATGAAATAGTATATGTGTAACAGGTTGCTGCTTGGAAAGACAAGGATGGGGATTGGTATGAAACAGG	TTTATATGTAAGAGAGTTTGTATACAATGAAATAGTATATGTGTAACAGGTTGCTGCTTGGAAAGACAAGGATGGGGCTTGGTGTGAAACAGG	93	2	Sub	N/A
1664	TTTATATGTAAGAGAGTTTGTATACAATGAAATAGTATATGTGTAACAGGTTGCTGCTTGGAAAGACAAGGATGGGGATTGGTATGAAACAGG	TTTATATGTAAGAGAGTTTGTATATAATGAAACAGTGTATGTGTAACAGGTTGCTGCTTGGAAAGACGAGGATGGGGATTTGTATGAAACAGG	93	2	Sub	N/A
1665	TTTATATGTAAGAGAGTTTGTATACAATGAAATAGTATATGTGTAACAGGTTGCTGCTTGGAAAGACAAGGATGGGGATTGGTATGAAACAGG	TTTATATGTAAGAGAGTTTGTATACAATGAAATACTATATGTGTAACAGGTTGCTGCTTGGAAAGACAAGGATGGGGATTGGTATGAAACATG	93	2	Sub	N/A
1666	TTTATATGTAAGAGAGTTTGTATACAATGAAATAGTATATGTGTAACAGGTTGCTGCTTGGAAAGACAAGGATGGGGATTGGTATGAAACAGG	TTTATATGTAAGAGAGTTTGTATACAATGAAATAGTATATGTGTAACAGGTTGCTGCTTGGAAAGACAAGGATGGGGCTTGATATGAAACAGG	93	2	Sub	N/A
1667	TTTATATGTAAGAGAGTTTGTATACAATGAAATAGTATATGTGTAACAGGTTGCTGCTTGGAAAGACAAGGATGGGGATTGGTATGAAACAGG	TTTATATGTAAGAGAGTTTGTATACAATGAAATAGTATATGTGTAATAGGTTCCTGCTTGGAAAGACCAGGATGGGGATTAGTATGAAACAGG	93	2	Sub	N/A
1668	TTTATATGTAAGAGAGTTTGTATACAATGAAATAGTATATGTGTAACAGGTTGCTGCTTGGAAAGACAAGGATGGGGATTGGTATGAAACAGG	TTTATATGTAAGAGAGTTTGTATACAATGAAATAGTATATGTGTAACAGGTTGCTGCTTGGAAAGACGAGGATGGGGATGGGTATGAAACAGG	93	2	Sub	N/A
1669	TTTATATGTAAGAGAGTTTGTATACAATGAAATAGTATATGTGTAACAGGTTGCTGCTTGGAAAGACAAGGATGGGGATTGGTATGAAACAGG	TTTATATGTAAGAGAGTTTGTATACAATGAAATAGTATATGTGTAATAGGTTGCCGCTTGGAAAGACAACGATGGGGATTGGTATGAAACAGG	93	2	Sub	N/A
1670	TTTATATGTAAGAGAGTTTGTATACAATGAAATAGTATATGTGTAACAGGTTGCTGCTTGGAAAGACAAGGATGGGGATTGGTATGAAACAGG	TTTATATGTAAGAGAGTTTGTATACCATGAAATAGTATATGTGTAACAGGTTGCTGCTTGGAAAGACAAGGATGGGGATTGGGATGAAACAGG	93	2	Sub	N/A
1671	TTTATATGTAAGAGAGTTTGTATACAATGAAATAGTATATGTGTAACAGGTTGCTGCTTGGAAAGACAAGGATGGGGATTGGTATGAAACAGG	TTTATATGTAAGAGAGTTTGTATACAATGAAATAGTATATGTGTAACAGGTTGATGCCCGGAAAGACAAGGATGGGGATTGGTATGAAACAGG	93	2	Sub	N/A
1672	TTTATATGTAAGAGAGTTTGTATACAATGAAATAGTATATGTGTAACAGGTTGCTGCTTGGAAAGACAAGGATGGGGATTGGTATGAAACAGG	TTTATATGTAAGAGAGTTTGTATACAATGGAATAGTATATGTGTAACAGGTTGCTGCTTGTAAAGACAAGGATGGGGATTGGTATGAAACAGG	93	2	Sub	N/A
1673	TTTATATGTAAGAGAGTTTGTATACAATGAAATAGTATATGTGTAACAGGTTGCTGCTTGGAAAGACAAGGATGGGGATTGGTATGAAACAGG	TTTATATGTAAGAGAGTTTGTATACAATGAAATAGTATATGTGTAACAGGTTGCTGCTTGGGAAGACGAGGATGGGGGTTGGTATGAAACAGG	93	2	Sub	N/A
1674	TTTATATGTAAGAGAGTTTGTATACAATGAAATAGTATATGTGTAACAGGTTGCTGCTTGGAAAGACAAGGATGGGGATTGGTATGAAACAGG	TTTATATGTAAGAGAGTTTGTATACAATGAAATAGTATATGTGTAACAGGTTGCTGCTTGTAAAGACAAGGATGGGGATTGGTATAAAACAGG	93	2	Sub	N/A
1675	TTTATATGTAAGAGAGTTTGTATACAATGAAATAGTATATGTGTAACAGGTTGCTGCTTGGAAAGACAAGGATGGGGATTGGTATGAAACAGG	TTTATATGTAAGAGAGTTTGTATACAATGAAATAGTATATGTGTAACAGGTTGCTGCTTGTAAAGAAAAGGATGGGGATTGGTATGAAACAGG	93	2	Sub	N/A
1676	TTTATATGTAAGAGAGTTTGTATACAATGAAATAGTATATGTGTAACAGGTTGCTGCTTGGAAAGACAAGGATGGGGATTGGTATGAAACAGG	TTTATATGTAAGAGAGTTTGTATACAATGAAATAGTATATGTGTAACTGGTTGCTGCTTGGAAAGATAAGGATGGGGATTGGTATGAAACACG	93	2	Sub	N/A
1677	TTTATATGTAAGAGAGTTTGTATACAATGAAATAGTATATGTGTAACAGGTTGCTGCTTGGAAAGACAAGGATGGGGATTGGTATGAAACAGG	TTTATATGTAAGAGAGTTTGTATACAATGAAATAGTATATGTGTAACAGGTTGCTGCTTGAAAAGACAAGGATGGGGATTGGTGTGAAACAGG	93	2	Sub	N/A
1678	TTTATATGTAAGAGAGTTTGTATACAATGAAATAGTATATGTGTAACAGGTTGCTGCTTGGAAAGACAAGGATGGGGATTGGTATGAAACAGG	TTTATATGTAAGAGAGTTTGTATACAATGAGATAGTATATGTGTAACAGGTTGCTGCTTGGAAAGACAAGGATGGGGATTGGTCTGAAACAGG	93	2	Sub	N/A
1679	TTTATATGTAAGAGAGTTTGTATACAATGAAATAGTATATGTGTAACAGGTTGCTGCTTGGAAAGACAAGGATGGGGATTGGTATGAAACAGG	TTTATATGTAAGAGAGTTTGTATACAATGAAATAGTATATGTGTAACAGGTTGCTGCTTGTAAAGACAAGGATGGGGATTGGTATGAAACATG	93	2	Sub	N/A
1680	TTTATATGTAAGAGAGTTTGTATACAATGAAATAGTATATGTGTAACAGGTTGCTGCTTGGAAAGACAAGGATGGGGATTGGTATGAAACAGG	TTTATATGTAAGAGAGTTTGTATACAATGAAATAGTATATGTGTAACCGGTTACTGCTTGGAAAGACAAGGATGGGGATTGGTATGAAACAGG	93	2	Sub	N/A
1681	TTTATATGTAAGAGAGTTTGTATACAATGAAATAGTATATGTGTAACAGGTTGCTGCTTGGAAAGACAAGGATGGGGATTGGTATGAAACAGG	TTTATATGTAAGAGAGTTTGTATACAATGAAATAGTATATGTGTAACGGGTTGCTGCTTGGAAAGACAAGGATGGGGGTTGGTATGATACAGG	93	2	Sub	N/A
1682	TTTATATGTAAGAGAGTTTGTATACAATGAAATAGTATATGTGTAACAGGTTGCTGCTTGGAAAGACAAGGATGGGGATTGGTATGAAACAGG	TTTATATGTAAGAGAGTTTGTATACAATGAAATAGTATATGTGTAACAGGTTACTGCTTGGAAAGACAAGGATGGGGATTGGTCTGAAACAGG	93	2	Sub	N/A
1683	TTTATATGTAAGAGAGTTTGTATACAATGAAATAGTATATGTGTAACAGGTTGCTGCTTGGAAAGACAAGGATGGGGATTGGTATGAAACAGG	TTTATATGTAAGAGAGTTTGTATACAATGAAGTAGTATATGTGTAGCAGGTTGCTGCTTGGAAAGACAAGGATGGGGATTGGTATGAAACAGG	93	2	Sub	N/A
1684	TTTATATGTAAGAGAGTTTGTATACAATGAAATAGTATATGTGTAACAGGTTGCTGCTTGGAAAGACAAGGATGGGGATTGGTATGAAACAGG	TTTATATGTAAGAGAGTTTGTATACAATGAAATAGTATATGTGTAACAGGTTGCTGCTGGGAAAGACCAGGATGGGGATTGGTATGAAACAGG	93	2	Sub	N/A
1685	TTTATATGTAAGAGAGTTTGTATACAATGAAATAGTATATGTGTAACAGGTTGCTGCTTGGAAAGACAAGGATGGGGATTGGTATGAAACAGG	TTTATATGTAAGAGAGTTTGTATACCATGAAATAGTATATGTGTAACGGGTTGATGCTTGGAAAGACAAGGATGGGGATTGGTATGAAACAGG	93	2	Sub	N/A
1686	TTTATATGTAAGAGAGTTTGTATACAATGAAATAGTATATGTGTAACAGGTTGCTGCTTGGAAAGACAAGGATGGGGATTGGTATGAAACAGG	TTTATATGTAAGAGGGTTTGTATACAATGAAATAGTATATGTGTAACAGGTTGCTGCTTGGAAAGACAAGGATGGGGATTGGTATGAGACAGG	93	2	Sub	N/A
1687	TTTATATGTAAGAGAGTTTGTATACAATGAAATAGTATATGTGTAACAGGTTGCTGCTTGGAAAGACAAGGATGGGGATTGGTATGAAACAGG	TTTATATGTAAGAGAGTTTGTATACAATGAAATAGTATATGTGTAATTGGTTGCTGCTTGGAAAGACAAGGATGGGGATTGGTATGAAACATG	93	2	Sub	N/A
1688	TTTATATGTAAGAGAGTTTGTATACAATGAAATAGTATATGTGTAACAGGTTGCTGCTTGGAAAGACAAGGATGGGGATTGGTATGAAACAGG	TTTATATGTAAGAGAGTTTGTATATAATGGAATAGTGTATGTGTAACGGGTTGCTGCTTGAAAAGACAAGGATGGGGATTGGTATGAAACAGG	93	2	Sub	N/A
1689	TTTATATGTAAGAGAGTTTGTATACAATGAAATAGTATATGTGTAACAGGTTGCTGCTTGGAAAGACAAGGATGGGGATTGGTATGAAACAGG	TTTATATGTAAGAGAGTTTGTATACAATGAAATAGTATATGTGTAACAGGTTTCTGCTTGGAAAGATAAGGATGGGGATTAGTATGAAACAGG	93	2	Sub	N/A
1690	TTTATATGTAAGAGAGTTTGTATACAATGAAATAGTATATGTGTAACAGGTTGCTGCTTGGAAAGACAAGGATGGGGATTGGTATGAAACAGG	TTTATATGTAAGAGAGTTTGTATACAATGAAGTAGTATATGTGTAACAGGTTGCTGCTTGGAAAGACGAGGATGGGGATTCGTATGAAACAGG	93	2	Sub	N/A
1691	TTTATATGTAAGAGAGTTTGTATACAATGAAATAGTATATGTGTAACAGGTTGCTGCTTGGAAAGACAAGGATGGGGATTGGTATGAAACAGG	TTTATATGTAAGAGAGTTTGTATACAATGAAATAGTATATGTGTAATAGGTTGCTGCTTGGAAAGACAAGGATGGGGCTTTGTATGAAACAGG	93	2	Sub	N/A
1692	TTTATATGTAAGAGAGTTTGTATACAATGAAATAGTATATGTGTAACAGGTTGCTGCTTGGAAAGACAAGGATGGGGATTGGTATGAAACAGG	TTTATATGTAAGAGAGTTTGTATACAATGAAATAGTATATGTGTAACCGGTTGCTGCTTGGCAAGACAAGGATGGGGATTGGTATGAAACAGG	93	2	Sub	N/A
1693	TTTATATGTAAGAGAGTTTGTATACAATGAAATAGTATATGTGTAACAGGTTGCTGCTTGGAAAGACAAGGATGGGGATTGGTATGAAACAGG	TTTATATGTAAGAGAGTTTGTATACAATGAAATAGTATATGTGTAACAGGTTGCTGCTTGGAAAGAAGAGGATGGGGATTAGTATGAAACAGG	93	2	Sub	N/A
1694	TTTATATGTAAGAGAGTTTGTATACAATGAAATAGTATATGTGTAACAGGTTGCTGCTTGGAAAGACAAGGATGGGGATTGGTATGAAACAGG	TTTATATGTAAGAGAGTTTGTATACAATGAAATAGTATATGTGTAACGGGTTGCTGCTTGGAAAGACGATGATGGGGATTGGTATGAAACAGG	93	2	Sub	N/A
1695	TTTATATGTAAGAGAGTTTGTATACAATGAAATAGTATATGTGTAACAGGTTGCTGCTTGGAAAGACAAGGATGGGGATTGGTATGAAACAGG	TTTATATGTAAGAGAGTTTGTATATAATAAAACAGTGTATGTGTAACAGGTTGCTGCTTGGAAAGACAAGGATGGGGATTGGTATGAAACAGG	93	2	Sub	N/A
1696	TTTATATGTAAGAGAGTTTGTATACAATGAAATAGTATATGTGTAACAGGTTGCTGCTTGGAAAGACAAGGATGGGGATTGGTATGAAACAGG	TTTATATGTAAGAGAGTTTGTATACAATGAAATAGTATATGTGTAACAGGTTGCTGCTTGGAAAGTAAAGGATGGGGATTGGTATGAAACAGG	93	2	Sub	N/A
1697	TTTATATGTAAGAGAGTTTGTATACAATGAAATAGTATATGTGTAACAGGTTGCTGCTTGGAAAGACAAGGATGGGGATTGGTATGAAACAGG	TTTATATGTAAGAGAGTTTGTATACAATGAAATAGTATATGTGTAACAGGTTGCTGCTTGGAAAGTCCAGGATGGGGATTGGTATGAAACAGG	93	2	Sub	N/A
1698	TTTATATGTAAGAGAGTTTGTATACAATGAAATAGTATATGTGTAACAGGTTGCTGCTTGGAAAGACAAGGATGGGGATTGGTATGAAACAGG	TTTATATGTAAGAGAGTTTGTATACAATGAAATAGTATATGTGTAACAGGTTGCTGCTTGGAAAGCCAAGGATGGGGCTTGGTATGAAACAGG	93	2	Sub	N/A
1699	TTTATATGTAAGAGAGTTTGTATACAATGAAATAGTATATGTGTAACAGGTTGCTGCTTGGAAAGACAAGGATGGGGATTGGTATGAAACAGG	TTTATATGTAAGAGAGTTTGTATACAATGAAATAGTATATGTGTAACAGGTTGCTGCTTGGAAAGCCACGGATGGGGATTGGTATGAAACAGG	93	2	Sub	N/A
1700	TTTATATGTAAGAGAGTTTGTATACAATGAAATAGTATATGTGTAACAGGTTGCTGCTTGGAAAGACAAGGATGGGGATTGGTATGAAACAGG	TTTATATGTAAGAGAGTTTGTATACAATGAAATAGTATATGTGTAACAGGTTGCTGCTTGGAAAGACAAGGATGGCGATTGCTATGAAACAGG	93	2	Sub	N/A
1701	TTTATATGTAAGAGAGTTTGTATACAATGAAATAGTATATGTGTAACAGGTTGCTGCTTGGAAAGACAAGGATGGGGATTGGTATGAAACAGG	TTTATATGTAAGAGAGTTTGTATACAATGAAATAGTATATGTGTAACGGGTTGCTGCTTTGAAAGACAAGGATGGGGATTGGTATGAAACAGG	93	2	Sub	N/A
1702	TTTATATGTAAGAGAGTTTGTATACAATGAAATAGTATATGTGTAACAGGTTGCTGCTTGGAAAGACAAGGATGGGGATTGGTATGAAACAGG	TTTATATGTAAGAGAGTTTGTATACAATGAAATAGTATATGTGTAACAGGTTGGTGCTTGGAAAGACAAGGATGGGGATTGGCATGAAACAGG	93	2	Sub	N/A
1703	TTTATATGTAAGAGAGTTTGTATACAATGAAATAGTATATGTGTAACAGGTTGCTGCTTGGAAAGACAAGGATGGGGATTGGTATGAAACAGG	TTTATATGTAAGAGAGTTTGTATACAATGAAATAGTATATGTGTAATTGCTTGCTGCTTGGAAAGACAAGGATGGGGATTGGTATGAAACAGG	93	2	Sub	N/A
1704	TTTATATGTAAGAGAGTTTGTATACAATGAAATAGTATATGTGTAACAGGTTGCTGCTTGGAAAGACAAGGATGGGGATTGGTATGAAACAGG	TTTATATGTAAGAGAGTTTGTATACAATGAAATAGTATATGTGTAACAGGTTGCCGCTTGGAAAGACAACGATGGGGATTGGCATGAAACAGG	93	2	Sub	N/A
1705	TTTATATGTAAGAGAGTTTGTATACAATGAAATAGTATATGTGTAACAGGTTGCTGCTTGGAAAGACAAGGATGGGGATTGGTATGAAACAGG	TTTATATGTAAGAGAGTTTGTATACAATGAAATAGTATATGTGTAACAGGTTGCTGCTTGGAAAGAC----ATGGGGATTGGCATGAAACAGG	89	2	del	N/A
1706	TTTATATGTAAGAGAGTTTGTATACAATGAAATAGTATATGTGTAACAGGTTGCTGCTTGGAAAGACAAGGATGGGGATTGGTATGAAACAGG	TTTATATGTAAGAGAGTTTGTATACCATGAAATAGTATATGTGTAACCGGTTGCTGCTTGGAAAGACAAGGATGGGGATTGGTATGAAACAGG	93	2	Sub	N/A
1707	TTTATATGTAAGAGAGTTTGTATACAATGAAATAGTATATGTGTAACAGGTTGCTGCTTGGAAAGACAAGGATGGGGATTGGTATGAAACAGG	TTTATATGTAAGAGAGTTTGTATATAATGAAACAGTGTATGTGTAACCGGTTGCTGCTTGGAAAGACAAGGATGGGGATTGGTATGAAACAGG	93	2	Sub	N/A
1708	TTTATATGTAAGAGAGTTTGTATACAATGAAATAGTATATGTGTAACAGGTTGCTGCTTGGAAAGACAAGGATGGGGATTGGTATGAAACAGG	TTTATATGTAAGAGAGTTTGTACACAATGAAATAGTATATGTGTAACCGGTTGCTGCTTGGAAAGACAAGGATGGGGATTGGTATGAAACAGG	93	2	Sub	N/A
1709	TTTATATGTAAGAGAGTTTGTATACAATGAAATAGTATATGTGTAACAGGTTGCTGCTTGGAAAGACAAGGATGGGGATTGGTATGAAACAGG	TTTATATGTAAGAGAGTTTGTATACAATGAAATAGTATATGTGTAATGGATTGCTGCTTGGAAAGACAAGGATGGGGATTGGTATGAAACAGG	93	2	Sub	N/A
1710	TTTATATGTAAGAGAGTTTGTATACAATGAAATAGTATATGTGTAACAGGTTGCTGCTTGGAAAGACAAGGATGGGGATTGGTATGAAACAGG	TTTATATGTAAGAGAGTTTGTATACAATGAAATAGTATATGTGTAACAGGTTGATGCTTGGAAAGACAAAGATGGGGATTGGTATGAAACAGG	93	2	Sub	N/A
1711	TTTATATGTAAGAGAGTTTGTATACAATGAAATAGTATATGTGTAACAGGTTGCTGCTTGGAAAGACAAGGATGGGGATTGGTATGAAACAGG	TTTATATGTAAGAGAGTTTGTATACAATGAAATAGTATATGTGTAACAGGATGCTGCTTGGAAAGACAAGGATGGGGATTAGTATGAAACAGG	93	2	Sub	N/A
1712	TTTATATGTAAGAGAGTTTGTATACAATGAAATAGTATATGTGTAACAGGTTGCTGCTTGGAAAGACAAGGATGGGGATTGGTATGAAACAGG	TTTATATGTAAGAGAGTTTGTATACAATGAAATAGTATATGTGTAACTGCGTGCTGCTTGGAAAGACAAGGATGGGGATTGGTATGAAACAGG	93	2	Sub	N/A
1713	TTTATATGTAAGAGAGTTTGTATACAATGAAATAGTATATGTGTAACAGGTTGCTGCTTGGAAAGACAAGGATGGGGATTGGTATGAAACAGG	TTTATATGTAAGAGAGTTTGTATACAATGAAATAGTATATGTGTAACTGAATGCTGCTTGGAAAGACAAGGATGGGGATTGGTATGAAACAGG	93	2	Sub	N/A
1714	TTTATATGTAAGAGAGTTTGTATACAATGAAATAGTATATGTGTAACAGGTTGCTGCTTGGAAAGACAAGGATGGGGATTGGTATGAAACAGG	TTTATATGTAAGAGAGTTTGTATACAATGAAATAGTATATGTGTAACAGCTTGCTGCTTGGAAAGAAAAGGATGGGGATTGGTATGAAACAGG	93	2	Sub	N/A
1715	TTTATATGTAAGAGAGTTTGTATACAATGAAATAGTATATGTGTAACAGGT-TGCTGCTTGGAAAGACAAGGATGGGGATTGGTATGAAACAGG	TTTATATGTAAGAGAGTTTGTATACAATGAAATAGTATATGTGTAAC-GGTGTGCTGCTTGGAAAGACAAGGATGGGGATTGGTATGAAACAGG	93	2	Sub	N/A
1716	TTTATATGTAAGAGAGTTTGTATACAATGAAATAGTATATGTGTAACAGGTTGCTGCTTGGAAAGACAAGGATGGGGATTGGTATGAAACAGG	TTTATATGTAAGAGAGTTTGTATACAATGAAATAGTATATGTGTAACAGCCTGCTACTTGGAAAGACAAGGATGGGGATTGGTATGAAACAGG	93	2	Sub	N/A
1717	TTTATATGTAAGAGAGTTTGTATACAATGAAATAGTATATGTGTAACAGGTTGCTGCTTGGAAAGACAAGGATGGGGATTGGTATGAAACAGG	TTTATATGTAAGAGAGTTTGTATACAATGAAATAGTATATGTGTAACCGCATGCTGCTTGGAAAGACAAGGATGGGGATTGGTATGAAACAGG	93	2	Sub	N/A
1718	TTTATATGTAAGAGAGTTTGTATACAATGAAATAGTATATGTGTAACAGGTTGCTGCTTGGAAAGACAAGGATGGGGATTGGTATGAAACAGG	TTTATATGTAAGAGAGTTTGTATACAATGAAATAGTATATGTGTAATAGTGTGCTGCTTGGAAAGACAAGGATGGGGATTGGTATGAAACAGG	93	2	Sub	N/A
1719	TTTATATGTAAGAGAGTTTGTATACAATGAAATAGTATATGTGTAACAGGTTGCTGCTTGGAAAGACAAGGATGGGGATTGGTATGAAACAGG	TTTATATGTAAGAGAGTTTGTATACAATGAAATAGTATATGTGTAACTGTGTGCTGCTTGGAAAGACAAGGATGGGGATTGGTATGAAACAGG	93	2	Sub	N/A
1720	TTTATATGTAAGAGAGTTTGTATACAATGAAATAGTATATGTGTAACAGGTTGCTGCTTGGAAAGACAAGGATGGGGATTGGTATGAAACAGG	TTTATATGTAAGAGAGTTTGTATACAATGAAATAGTATATGTGTAACAGGCTGCTGCTTGGAAAGACAAGGATGGGGATTGGTATGAAACAGA	93	2	Sub	N/A
1721	TTTATATGTAAGAGAGTTTGTATACAATGAAATAGTATATGTGTAACAGGTTGCTGCTTGGAAAGACAAGGATGGGGATTGGTATGAAACAGG	TTTATATGTAAGAGAGTTTGTATACAATGAAATAGTATATGTGTAACAGCCTGCTGCTTGGAAAGACAAGGATGGGGATTGGTATGACACAGG	93	2	Sub	N/A
1722	TTTATATGTAAGAGAGTTTGTATACAATGAAATAGTATATGTGTAACAGGTTGCTGCTTGGAAAGACAAGGATGGGGATTGGTATGAAACAGG	TTTATATGTAAGAGAGTTTGTATACAATGAAATAGTATATGTGTAATAGCTTGCTGCTTGGAAAGACAAGGATGGGGATTGGGATGAAACAGG	93	2	Sub	N/A
1723	TTTATATGTAAGAGAGTTTGTATACAATGAAATAGTATATGTGTAACAGGTTGCTGCTTGGAAAGACAAGGATGGGGATTGGTATGAAACAGG	TTTATATGTAAGAGAGTTTGTATACAATGAAATAGTATATGTGTAATAGTCTGCTGCTTGGAAAGACAAGGATGGGGATTGGTATGAAACAGG	93	2	Sub	N/A
1724	TTTATATGTAAGAGAGTTTGTATACAATGAAATAGTATATGTGTAACAGGTTGCTGCTTGGAAAGACAAGGATGGGGATTGGTATGAAACAGG	TTTATATGTAAGAGAGTTTGTGTACAATGAAATAGTATATGTGTAACAGCCTGCTGCTTGGAAAGACAAGGATGGGGATTGGCATGAAACAGG	93	2	Sub	N/A
1725	TTTATATGTAAGAGAGTTTGTATACAATGAAATAGTATATGTGTAACAGGTTGCTGCTTGGAAAGACAAGGATGGGGATTGGTATGAAACAGG	TTTATATGTAAGAGAGTTTGTATACAATGAAATAGTATATGTGTAACAGGTTTCTGCTTGGAAAGATAAGGATGGGGATTGGTATGCAACAGG	93	2	Sub	N/A
1726	TTTATATGTAAGAGAGTTTGTATACAATGAAATAGTATATGTGTAACAGGTTGCTGCTTGGAAAGACAAGGATGGGGATTGGTATGAAACAGG	TTTATATGTAAGAGAGTTTGTATACAATGAAATAGTATATGTGTAACAGGTTGCTGCTTGGAAAGAGTAGGATGGGGATTTGTATGAAACAGG	93	2	Sub	N/A
1727	TTTATATGTAAGAGAGTTTGTATACAATGAAATAGTATATGTGTAACAGGTTGCTGCTTGGAAAGACAAGGATGGGGATTGGTATGAAACAGG	TTTATATGTAAGAGAGTTTGTATACAATGAAATAGTATATGTGTAATAGACTGCTGCTTGGAAAGACAAGGATGGGGATTGGCATGAAACAGG	93	2	Sub	N/A
1728	TTTATATGTAAGAGAGTTTGTATACAATGAAATAGTATATGTGTAACAGGTTGCTGCTTGGAAAGACAAGGATGGGGATTGGTATGAAACAGG	TTTATATGTAAGAGAGTTTGTATACAATGAAATAGTATATGTGTAACAGCTTGCTGCTTGGAAAGACAAGGATGGGGATTGGAATGAAACAGG	93	2	Sub	N/A
1729	TTTATATGTAAGAGAGTTTGTATACAATGAAATAGTATATGTGTAACAGGTTGCTGCTTGGAAAGACAAGGATGGGGATTGGTATGAAACAGG	TTTATATGTAAGAGAGTTTGTATACAATGAAATAGTGTATGTGTAACGGGCTGCTGCTTGGAAAGACAAGGATGGGGATTGGCATGAAACAGG	93	2	Sub	N/A
1730	TTTATATGTAAGAGAGTTTGTATACAATGAAATAGTATATGTGTAACAGGTTGCTGCTTGGAAAGACAAGGATGGGGATTGGTATGAAACAGG	TTTATATGTAAGAGAGTTTGTATACAATGAAATAGTATATGTGTAATAGGGTGCTGCTTGGAAAGACAAGGATGGGGATTGGAATGAAACAGG	93	2	Sub	N/A
1731	TTTATATGTAAGAGAGTTTGTATACAATGAAATAGTATATGTGTAACAGGTTGCTGCTTGGAAAGACAAGGATGGGGATTGGTATGAAACAGG	TTTATATGTAAGAGAGTTTGTATACAATGAAATAGTATATGTGTAACAGGTTGCTGTTTGGAAAGAC----ATGGGGATTGGTATGAAACAGG	89	2	del	N/A
1732	TTTATATGTAAGAGAGTTTGTATACAATGAAATAGTATATGTGTAACAGGTTGCTGCTTGGAAAGACAAGGATGGGGATTGGTATGAAACAGG	TTTATATGTAAGAGAGTTTGTATACAATGAAATAGTATATGTGTAACAGTATGCTGCTTGGAAAGACAAGGATGGGGATTGGGATGAAACAGG	93	2	Sub	N/A
1733	TTTATATGTAAGAGAGTTTGTATACAATGAAATAGTATATGTGTAACAGGTTGCTGCTTGGAAAGACAAGGATGGGGATTGGTATGAAACAGG	TTTATATGTAAGAGAGTTTGTATACAATGAAATAGTATATGTGTAACAGTGTGCTGCTTGGAAAGACAAGGATGGGGATTGGGATGAAACAGG	93	2	Sub	N/A
1734	TTTATATGTAAGAGAGTTTGTATACAATGAAATAGTATATGTGTAACAGGTTGCTGCTTGGAAAGACAAGGATGGGGATTGGTATGAAACAGG	TTTATATGTAAGAGAGTTTGTATACAATGAAATAGTATATGTGTAATAGGGTGCTGCTTGGAAAGACAAGGATGGGGATTGGCATGAAACAGG	93	2	Sub	N/A
1735	TTTATATGTAAGAGAGTTTGTATACAATGAAATAGTATATGTGTAACAGGTTGCTGCTTGGAAAGACAAGGATGGGGATTGGTATGAAACAGG	TTTATATGTAAGAGAGTTTGTATACAATGAAATAGTATATGTGTAACAGGTTACTGCTTGGAAAGACGAGGATGGGGATTGGTATGAAACAGG	93	2	Sub	N/A
1736	TTTATATGTAAGAGAGTTTGTATACAATGAAATAGTATATGTGTAACAGGTTGCTGCTTGGAAAGACAAGGATGGGGATTGGTATGAAACAGG	TTTATATGTAAGAGAGTTTGTATACAATGAAATAGTATATGTGTAACAGGTTGCTGCTTGGAAAGAC----ATGGGGATTGGAATGAAACAGG	89	2	del	N/A
1737	TTTATATGTAAGAGAGTTTGTATACAATGAAATAGTATATGTGTAACAGGTTGCTGCTTGGAAAGACAAGGATGGGGATTGGTATGAAACAGG	TTTATATGTAAGAGAGTTTGTATACAATGAAATAGTATATGTGTAACCGGTTGCTGCTTGGAAAGACTAGGATGGGGCTTCGTATGAAACAGG	93	2	Sub	N/A
1738	TTTATATGTAAGAGAGTTTGTATACAATGAAATAGTATATGTGTAACAGGTTGCTGCTTGGAAAGACAAGGATGGGGATTGGTATGAAACAGG	TTTATATGTAAGAGAGTTTGTATACAATGAAATAGTATATGTGTAACAGGTTGCTGCTTGGAAAGAAAGGGATGGGGCTTAGTATGAAACAGG	93	2	Sub	N/A
1739	TTTATATGTAAGAGAGTTTGTATACAATGAAATAGTATATGTGTAACAGGTTGCTGCTTGGAAAGACAAGGATGGGGATTGGTATGAAACAGG	TTTATATGTAAGAGAGTTTGTATACAATGAAATAGTATATGTGTAACGGGTTGCTGCTTGGAAAGACAAGGATGGGGATTGCTATGAAACAGG	93	2	Sub	N/A
1740	TTTATATGTAAGAGAGTTTGTATACAATGAAATAGTATATGTGTAACAGGTTGCTGCTTGGAAAGACAAGGATGGGGATTGGTATGAAACAGG	TTTATATGTAAGAGAGTTTGTATACAATGAAATAGTATATGTGTAACAGGTTGCTACTTGGAAAGACAAGGATGGGGATTGGTATGAAACAGT	93	2	Sub	N/A
1741	TTTATATGTAAGAGAGTTTGTATACAATGAAATAGTATATGTGTAACAGGTTGCTGCTTGGAAAGACAAGGATGGGGATTGGTATGAAACAGG	TTTATATGTAAGAGAGTTTGTATACAATGAAATAGTATATGTGTAACTGGTTGCTGCTTGGAAAGACTAGGATGGGGATTAGTATGAAACAGG	93	2	Sub	N/A
1742	TTTATATGTAAGAGAGTTTGTATACAATGAAATAGTATATGTGTAACAGGTTGCTGCTTGGAAAGACAAGGATGGGGATTGGTATGAAACAGG	TTTATATGTAAGAGAGTTTGTATACAATGAAATAGTATATGTGTAACGGGTTGCTGCTTGGAAAGAACAGGATGGGGATTCGTATGAAACAGG	93	2	Sub	N/A
1743	TTTATATGTAAGAGAGTTTGTATACAATGAAATAGTATATGTGTAACAGGTTGCTGCTTGGAAAGACAAGGATGGGGATTGGTATGAAACAGG	TTTATATGTAAGAGAGTTTGTATACAATGAAATAGTATATGTGTAACTGGTTGCTGCTTGGAAAGACACGGATGGGGATTAGTATGAAACAGG	93	2	Sub	N/A
1744	TTTATATGTAAGAGAGTTTGTATACAATGAAATAGTATATGTGTAACAGGTTGCTGCTTGGAAAGACAAGGATGGGGATTGGTATGAAACAGG	TTTATATGTAGGAGAGTTTGTATACAATGAAATAGTATATGTGTAACAGGTTGCTGCTTGGAAAGAC----ATGGGGATTGGTATGAAACAGG	89	2	del	N/A
1745	TTTATATGTAAGAGAGTTTGTATACAATGAAATAGTATATGTGTAACAGGTTGCTGCTTGGAAAGACAAGGATGGGGATTGGTATGAAACAGG	TTTATATGTAAGAGAGTTTGTATACAATGAAATAGTATATGTGTAACGGGTTGCTGCTTGGAAAGAAAAGGATGGGGGTTAGTATGAAACAGG	93	2	Sub	N/A
1746	TTTATATGTAAGAGAGTTTGTATACAATGAAATAGTATATGTGTAACAGGTTGCTGCTTGGAAAGACAAGGATGGGGATTGGTATGAAACAGG	TTTATATGTAAGAGAGTTTGTATACAATGAAATAGTATATGTGTAATTGGTTGCTGCTTGGAAAGACAAGGATGGGGATTGGTATGCAACAGG	93	2	Sub	N/A
1747	TTTATATGTAAGAGAGTTTGTATACAATGAAATAGTATATGTGTAACAGGTTGCTGCTTGGAAAGACAAGGATGGGGATTGGTATGAAACAGG	TTTATATGTAAGAGAGCTTGTATACAATGAAATAGTATATGTGTAACAGGTTGATGCTTGGAAAGACAAGGATGGGGATTGGTATGAAACAGG	93	2	Sub	N/A
1748	TTTATATGTAAGAGAGTTTGTATACAATGAAATAGTATATGTGTAACAGGTTGCTGCTTGGAAAGACAAGGATGGGGATTGGTATGAAACAGG	TTTATATGTAAGAGAGTTTGTATACAATGAAATAGTATATGTGTAACAGGGTGCTGCTGGGAAAGAC----ATGGGGATTGGTATGAAACAGG	89	2	del	N/A
1749	TTTATATGTAAGAGAGTTTGTATACAATGAAATAGTATATGTGTAACAGGTTGCTGCTTGGAAAGACAAGGATGGGGATTGGTATGAAACAGG	TTTATATGTAAGAGAGTTTGTATACACTGAAATAGTATATGTGTAACAGGTTGCTGCTTGGAAAGACAAGGATGGGGATTTGTATGAAACAGG	93	2	Sub	N/A
1750	TTTATATGTAAGAGAGTTTGTATACAATGAAATAGTATATGTGTAACAGGTTGCTGCTTGGAAAGACAAGGATGGGGATTGGTATGAAACAGG	TTTATATGTAAGAGAGATTGTATACAATGAAATAGTATATGTGTAATAGGTTGCTGCTTGGAAAGACAAGGATGGGGATTAGTATGAAACAGG	93	2	Sub	N/A
1751	TTTATATGTAAGAGAGTTTGTATACAATGAAATAGTATATGTGTAACAGGTTGCTGCTTGGAAAGACAAGGATGGGGATTGGTATGAAACAGG	TTTATATGTAAGAGAGTTTGTATACAGTGAAATAGTATATGTGTAACAGGTTGCTGCTTGGAAAGACAAGGATGGGGATTTGTATGAAACAGG	93	2	Sub	N/A
1752	TTTATATGTAAGAGAGTTTGTATACAATGAAATAGTATATGTGTAACAGGTTGCTGCTTGGAAAGACAAGGATGGGGATTGGTATGAAACAGG	TTTATATGTAAGAGAGTTTGTATGCAATGAAATAGTATATGTGTAATAGGTTGCTGCTTGGAAAGACAAGGATGGGGATTTGTATGAAACAGG	93	2	Sub	N/A
1753	TTTATATGTAAGAGAGTTTGTATACAATGAAATAGTATATGTGTAACAGGTTGCTGCTTGGAAAGACAAGGATGGGGATTGGTATGAAACAGG	TTTATATGTAAGAGAGCTTGTATACAATGAAATAGTATATGTGTAATAGGTTGCTGCTTGGAAAGACAAGGATGGGGATTCGTATGAAACAGG	93	2	Sub	N/A
1754	TTTATATGTAAGAGAGTTTGTATACAATGAAATAGTATATGTGTAACAGGTTGCTGCTTGGAAAGACAAGGATGGGGATTGGTATGAAACAGG	TTTATATGTAAGAGAGCTTGTATACAATGAAATAGTATATGTGTAATAGGTTGCTGCTTGGAAAGACAAGGATGGGGATTAGTATGAAACAGG	93	2	Sub	N/A
1755	TTTATATGTAAGAGAGTTTGTATACAATGAAATAGTATATGTGTAACAGGTTGCTGCTTGGAAAGACAAGGATGGGGATTGGTATGAAACAGG	TTTATATGTAAGAGAGGTTGTATACAATGAAATAGTATATGTGTAACAGGTTGCTGCTTGGAAAGACAAGGATGGGGATTAGTATGAAACAGG	93	2	Sub	N/A
1756	TTTATATGTAAGAGAGTTTGTATACAATGAAATAGTATATGTGTAACAGGTTGCTGCTTGGAAAGACAAGGATGGGGATTGGTATGAAACAGG	TTTATATGTAAGAGAATTTGTATACAATGAAATAGTATATGTGTAACAGGTTGCTGCTTGGAAAGACAAGGATGGGGATTCGTATGAAACAGG	93	2	Sub	N/A
1757	TTTATATGTAAGAGAGTTTGTATACAATGAAATAGTATATGTGTAACAGGTTGCTGCTTGGAAAGACAAGGATGGGGATTGGTATGAAACAGG	TTTATATGTAAGAGAGTTTGTATACAATGAAATAGTATATGTGTAACTGGTTGCTGCTTGGAAAGACGAGGATGGGGATTAGTATGAAACAGG	93	2	Sub	N/A
1758	TTTATATGTAAGAGAGTTTGTATACAATGAAATAGTATATGTGTAACAGGTTGCTGCTTGGAAAGACAAGGATGGGGATTGGTATGAAACAGG	TTTATATGTAAGAGAGTTTGTATACAATGAAATAGTATATGTGTAATAGGTTGCTGCTTGGAAAGAGCAGGATGGGGATTGGTATGAAACAGG	93	2	Sub	N/A
1759	TTTATATGTAAGAGAGTTTGTATACAATGAAATAGTATATGTGTAACAGGTTGCTGCTTGGAAAGACAAGGATGGGGATTGGTATGAAACAGG	TTTATATGTAAGAGAGTTTGCATACAATGAAATAGTATATGTGTAACAGGTTGCTGCTTGGAAAGACAAGGATGGGGATTCGTATGAAACAGG	93	2	Sub	N/A
1760	TTTATATGTAAGAGAGTTTGTATACAATGAAATAGTATATGTGTAACAGGTTGCTGCTTGGAAAGACAAGGATGGGGATTGGTATGAAACAGG	TTTATATGTAAGAGAGTTTGTATACAATGAACTAGTATATGTGTAACAGGTTGCTGCTTGGAAAGAAAAGGATGGGGATTAGTATGAAACAGG	93	2	Sub	N/A
1761	TTTATATGTAAGAGAGTTTGTATACAATGAAATAGTATATGTGTAACAGGTTGCTGCTTGGAAAGACAAGGATGGGGATTGGTATGAAACAGG	TTTATATGTAAGAGAGTTTGTATACAATGAAATAGTATATGTGTAACAGGTTGCGGCTTGGAAAGACATGGATGGGGATTGGTATGAAACAGG	93	2	Sub	N/A
1762	TTTATATGTAAGAGAGTTTGTATACAATGAAATAGTATATGTGTAACAGGTTGCTGCTTGGAAAGACAAGGATGGGGATTGGTATGAAACAGG	TTTATATGTAAGAGAGTTTGTATACAATGAAATAGTATATGTGTAACAGGTTGCTGCTTGGAAAGAATAGGATGGGGATTCGTATGAAACAGG	93	2	Sub	N/A
1763	TTTATATGTAAGAGAGTTTGTATACAATGAAATAGTATATGTGTAACAGGTTGCTGCTTGGAAAGACAAGGATGGGGATTGGTATGAAACAGG	TTTATATGTAAGAGAGTTTGTATACAATGAAATAGTATATGTGTAACAGGTTGCTGCTTGGAAAGAAAAGGATGGGGCTTTGTATGAAACAGG	93	2	Sub	N/A
1764	TTTATATGTAAGAGAGTTTGTATACAATGAAATAGTATATGTGTAACAGGTTGCTGCTTGGAAAGACAAGGATGGGGATTGGTATGAAACAGG	TTTATATGTAAGAGAGTTTGTATACAATGAAATAGTATATGTGTAACTGGTTTCTGCTTGGAAAGACAGGGATGGGGATTGGTATGAAACAGG	93	2	Sub	N/A
1765	TTTATATGTAAGAGAGTTTGTATACAATGAAATAGTATATGTGTAACAGGTTGCTGCTTGGAAAGACAAGGATGGGGATTGGTATGAAACAGG	TTTATATGTAAGAGAGTTTGTATACAATGAAATGGTATATGTGTAACAGGTTGCTGCTTAGAAAGACAAGGATGGGGATTCGTATGAAACAGG	93	2	Sub	N/A
1766	TTTATATGTAAGAGAGTTTGTATACAATGAAATAGTATATGTGTAACAGGTTGCTGCTTGGAAAGACAAGGATGGGGATTGGTATGAAACAGG	TTTATATGTAAGAGAGTTTGTATACAATGAAATAGTATATGTGTAACGGGTTGCTGCTTAGAAAGACAAGGATGGGGATTAGTATGAAACAGG	93	2	Sub	N/A
1767	TTTATATGTAAGAGAGTTTGTATACAATGAAATAGTATATGTGTAACAGGTTGCTGCTTGGAAAGACAAGGATGGGGATTGGTATGAAACAGG	TTTATATGTAAGAGAGTTTGTATACAATGAAATAGTATATGTGTAATAGGTTGCTGCTTTGAAAGACAAGGATGGGGATTTGTATGAAACAGG	93	2	Sub	N/A
1768	TTTATATGTAAGAGAGTTTGTATACAATGAAATAGTATATGTGTAACAGGTTGCTGCTTGGAAAGACAAGGATGGGGATTGGTATGAAACAGG	TTTATATGTAAGAGAGTTTGTATACAATGAAATAGTATATGTGTAACAGGTTTCTGCTTTGAAAGACAAGGATGGGGATTGGTATGAAACAGG	93	2	Sub	N/A
1769	TTTATATGTAAGAGAGTTTGTATACAATGAAATAGTATATGTGTAACAGGTTGCTGCTTGGAAAGACAAGGATGGGGATTGGTATGAAACAGG	TTTATATGTAAGAGAGTTTGTATACAATGAAATAGTATATGTGTAACAGGTTGCTGCTTATAAAGACAAGGATGGGGATTAGTATGAAACAGG	93	2	Sub	N/A
1770	TTTATATGTAAGAGAGTTTGTATACAATGAAATAGTATATGTGTAACAGGTTGCTGCTTGGAAAGACAAGGATGGGGATTGGTATGAAACAGG	TTTATATGTAAGAGAGTTTGTATACAATGAAATAGTATATGTGTAACAGGTTGCTGCTTACAAAGACAAGGATGGGGATTTGTATGAAACAGG	93	2	Sub	N/A
1771	TTTATATGTAAGAGAGTTTGTATACAATGAAATAGTATATGTGTAACAGGTTGCTGCTTGGAAAGACAAGGATGGGGATTGGTATGAAACAGG	TTTATATGTAAGAGAGTTTGTATACAATGAAATAGTATATGTGTAACAGGTTGCTGCTTCTAAAGACAAGGATGGGGATTAGTATGAAACAGG	93	2	Sub	N/A
1772	TTTATATGTAAGAGAGTTTGTATACAATGAAATAGTATATGTGTAACAGGTTGCTGCTTGGAAAGACAAGGATGGGGATTGGTATGAAACAGG	TTTATATGTAAGAGAGTTTGTATATAATGGAACAGTGTATGTGTAACGGGTTGCTGCTTGGAAAGACAAGGATGGGGATTGGTATGAAACAGG	93	2	Sub	N/A
1773	TTTATATGTAAGAGAGTTTGTATACAATGAAATAGTATATGTGTAACAGGTTGCTGCTTGGAAAGACAAGGATGGGGATTGGTATGAAACAGG	TTTATATGTAAGAGAGTTTGTATACAATGAAATAGTATATGTGTAACTGGTTGCTGCTTGGAAAGAGAAGGATGGGGATTAGTATGAAACAGG	93	2	Sub	N/A
1774	TTTATATGTAAGAGAGTTTGTATACAATGAAATAGTATATGTGTAACAGGTTGCTGCTTGGAAAGACAAGGATGGGGATTGGTATGAAACAGG	TTTATATGTAAGAGAGTTTGTATATAATGAAACAGTGTATGTGTAACAGGTTGCTGCTTGGAAAGAC----ATGGGGCTTGGTATGAAACAGG	89	2	del	N/A
1775	TTTATATGTAAGAGAGTTTGTATACAATGAAATAGTATATGTGTAACAGGTTGCTGCTTGGAAAGACAAGGATGGGGATTGGTATGAAACAGG	TTTATATGTAAGAGAGTTTGTATACAATGAAATAGTATATGTGTAACAGGTTGCTTCTTGGAAAGACAAGGATGGGGATTGGAATGAAACAGG	93	2	Sub	N/A
1776	TTTATATGTAAGAGAGTTTGTATACAATGAAATAGTATATGTGTAACAGGTTGCTGCTTGGAAAGACAAGGATGGGGATTGGTATGAAACAGG	TTTATATGTAAGAGAGTTTGTATACAATGAAATAGTATATGTGTAACAGGTTCCTGCTTGGAAAGACGAGGATGGGGATTCGTATGAAACAGG	93	2	Sub	N/A
1777	TTTATATGTAAGAGAGTTTGTATACAATGAAATAGTATATGTGTAACAGGTTGCTGCTTGGAAAGACAAGGATGGGGATTGGTATGAAACAGG	TTTATATGTAAGAGAGTTTGTATACTATGAAATAGTATATGTGTAACAGGTTGCTGCTTGGAAAGACAAGGATGGGGATTCGTATGAAACAGG	93	2	Sub	N/A
1778	TTTATATGTAAGAGAGTTTGTATACAATGAAATAGTATATGTGTAACAGGTTGCTGCTTGGAAAGACAAGGATGGGGATTGGTATGAAACAGG	TTTATATGTAAGAGAGTTTGTATACAATGAAATAGTATATGTGTAACAGGTTGCTGCTTGGAAAGATAAGGATGGGGATTGTTATGAAACAGG	93	2	Sub	N/A
1779	TTTATATGTAAGAGAGTTTGTATACAATGAAATAGTATATGTGTAACAGGTTGCTGCTTGGAAAGACAAGGATGGGGATTGGTATGAAACAGG	TTTATATGTAAGAGAGTTTGTATACAATGAAATAGTATATGTGTAACAGGTTGCTGCTTGGAAAGACCAGGATGGGGATTGCTATGAAACAGG	93	2	Sub	N/A
1780	TTTATATGTAAGAGAGTTTGTATACAATGAAATAGTATATGTGTAACAGGTTGCTGCTTGGAAAGACAAGGATGGGGATTGGTATGAAACAGG	TTTATATGTAAGAGAGTTTGTATACAATGAAATAGTATATGTGTAACAGGTTGCTGCTTGGAAATACAAGGATGGGGTTTGGTATGAAACAGG	93	2	Sub	N/A
1781	TTTATATGTAAGAGAGTTTGTATACAATGAAATAGTATATGTGTAACAGGTTGCTGCTTGGAAAGACAAGGAT------------------GGGGATTGGTATGAAACAGG	TTTATATGTAAGAGAGTTTGTATACAATGAAATAGTATATGTGTAACAGGTTGCTGCTTGGAAAGACAAGGATGGGGATTGGCATGAAACAGGGGATTGGTATGAAACAGG	111	2	Ins	N/A
1782	TTTATATGTAAGAGAGTTTGTATACAATGAAATAGTATATGTGTAACAGGTTGCTGCTTGGAAAGACAAGGATGGGGATTGGTATGAAACAGG	TTTATATGTAAGGGAGTTTGTATACAATGAAATAGTATATGTGTAACAGGTTGCTGCTTGGAAATACAAGGATGGGGATTGGTATGAAACAGG	93	2	Sub	N/A
1783	TTTATATGTAAGAGAGTTTGTATACAATGAAATAGTATATGTGTAACAGGTTGCTGCTTGGAAAGACAAGGATGGGGATTGGTATGAAACAGG	TTTATATGTAAGAGAGTTTGTATACAATGAAATAGTATATGTGTAACAGGTTGCTGCTTGGAAACGCAAGGATGGGGATTGGTATGAAACAGG	93	2	Sub	N/A
1784	TTTATATGTAAGAGAGTTTGTATACAATGAAATAGTATATGTGTAACAGGTTGCTGCTTGGAAAGACAAGGATGGGGATTGGTATGAAACAGG	TTTATATGTAAGAGAGTTTGTATACAATGAAATAGTATATGTGTAATTGGTTGCTGCTTGGAAATACAAGGATGGGGATTAGTATGAAACAGG	93	2	Sub	N/A
1785	TTTATATGTAAGAGAGTTTGTATACAATGAAATAGTATATGTGTAACAGGTTGCTGCTTGGAAAGACAAGGATGGGGATTGGTATGAAACAGG	TTTATATGTAAGAGAGTTTGTATATAATGAAACAGTGTATGTGTAACAGGTTGCTGCTTAGAAAGAC----ATGGGGATTGGTATGAAACAGG	89	2	del	N/A
1786	TTTATATGTAAGAGAGTTTGTATACAATGAAATAGTATATGTGTAACAGGTTGCTGCTTGGAAAGACAAGGATGGGGATTGGTATGAAACAGG	TTTATATGTAAGAGAGTTTGTATACAATGAAATAGTATATGTGTAATTGGTTGCTGCTTGGAAAGAAAAGGATGGGGATTAGTATGAAACAGG	93	2	Sub	N/A
1787	TTTATATGTAAGAGAGTTTGTATACAATGAAATAGTATATGTGTAACAGGTTGCTGCTTGGAAAGACAAGGATGGGGATTGGTATGAAACAGG	TTTATATGTAAGAGAGTTTGTATACAATGAAATAGTATATGTGTAATAGGTTGCTGCTTGGAAAGAAAAGGATGGGGTTTGGTATGAAACAGG	93	2	Sub	N/A
1788	TTTATATGTAAGAGAGTTTGTATACAATGAAATAGTATATGTGTAACAGGTTGCTGCTTGGAAAGACAAGGATGGGGATTGGTATGAAACAGG	TTTATATGTAAGAGAGTTTGTATACAATGAAATAGTGTATGTGTAACGGGTTGCTGCTTGGAAAGACAAGGATGGGGGTTGGTATGAAACAGG	93	2	Sub	N/A
1789	TTTATATGTAAGAGAGTTTGTATACAATGAAATAGTATATGTGTAACAGGTTGCTGCTTGGAAAGACAAGGATGGGGATTGGTATGAAACAGG	TTTATATGTAAGAGAGTTTGTATACAATGAAATAGTATATGTGTAACCGGTTGCTGCTTGGAAAGACAAGGATGGGGCTTCGTATGAAACAGG	93	2	Sub	N/A
1790	TTTATATGTAAGAGAGTTTGTATACAATGAAATAGTATATGTGTAACAGGTTGCTGCTTGGAAAGACAAGGATGGGGATTGGTATGAAACAGG	TTTATATGTAAGAGAGTTTGTATACAATGAAATAGTATATGTGTAACAGGTTGCGGCCTGGAAAGACAAGGATGGGGATTGGTATGAAACAGG	93	2	Sub	N/A
1791	TTTATATGTAAGAGAGTTTGTATACAATGAAATAGTATATGTGTAACAGGTTGCTGCTTGGAAAGACAAGGATGGGGATTGGTATGAAACAGG	TTTATATGTAAGAGAGTTTGTATACAATGAAATCGTATATGTGTAACAGGTTGCTGCTTGGAAAGACAAGGATGGGGATTGGTATGACACAGG	93	2	Sub	N/A
1792	TTTATATGTAAGAGAGTTTGTATACAATGAAATAGTATATGTGTAACAGGTTGCTGCTTGGAAAGACAAGGATGGGGATTGGTATGAAACAGG	TTTATATGTCAGAGAGTTTGTATACAATGAAATAGTATATGTGTAACAGGTTGCTGCTTGGAAAGACAAGGATGGGGATTGGTATGAAACATG	93	2	Sub	N/A
1793	TTTATATGTAAGAGAGTTTGTATACAATGAAATAGTATATGTGTAACAGGTTGCTGCTTGGAAAGACAAGGATGGGGATTGGTATGAAACAGG	TTTATATGTAAGAGAGTTTGTATACAATGAAATAGTATATGTGTAACAGGTTGCTACTTGGAAAGACAAGGATGGGGATTGGTATGAAACACG	93	2	Sub	N/A
1794	TTTATATGTAAGAGAGTTTGTATACAATGAAATAGTATATGTGTAACAGGTTGCTGCTTGGAAAGACAAGGATGGGGATTGGTATGAAACAGG	TTTATATGTCAGAGAGTTTGTATACAATGAAATAGTATATGTGTAACAGGTTGCTGCTTGGAAAGACAAGGATGGGGATTGGTATGAAACACG	93	2	Sub	N/A
1795	TTTATATGTAAGAGAGTTTGTATACAATGAAATAGTATATGTGTAACAGGTTGCTGCTTGGAAAGACAAGGATGGGGATTGGTATGAAACAGG	TTTATATGTAAGAGAGTTTGTATACAATGAAATAGTATATGTGTAACAGGTTGCTGCTTGGAAAGAGGAGGATGGGGATTGGTATGTAACAGG	93	2	Sub	N/A
1796	TTTATATGTAAGAGAGTTTGTATACAATGAAATAGTATATGTGTAACAGGTTGCTGCTTGGAAAGACAAGGATGGGGATTGGTATGAAACAGG	TTTATATGTAAGAGAGTTTGTATACAATGAAATAGTATATGTGTAACAGGTTGCTGCTTGGAAAGACAAGGATGGGCATGGGTATGAAACAGG	93	2	Sub	N/A
1797	TTTATATGTAAGAGAGTTTGTATACAATGAAATAGTATATGTGTAACAGGTTGCTGCTTGGAAAGACAAGGATGGGGATTGGTATGAAACAGG	TTTATATGTAAGAGAGTTTGTATACAATGAAATAGTATATGTGTAACAGGTTGCTGCTTGGAAAGAC----ATGGGCATTGGTATGAAACAGG	89	2	del	N/A
1798	TTTATATGTAAGAGAGTTTGTATACAATGAAATAGTATATGTGTAACAGGTTGCTGCTTGGAAAGACAAGGATGGGGATTGGTATGAAACAGG	TTTATATGTAAGAGAGTTTGTATACAATGAAATAGTATATGTGTAACAGGTTGCTGCTTGGAAAGAC----ATGGGTATTGGTATGAAACAGG	89	2	del	N/A
1799	TTTATATGTAAGAGAGTTTGTATACAATGAAATAGTATATGTGTAACAGGTTGCTGCTTGGAAAGACAAGGATGGGGATTGGTATGAAACAGG	TTTATATGTAAGAGAGTTTGTATACAATGAAATAGTATATGTGTAACAGGTTGCTGCTTGGAAAGACAAGGACTGGGATTGGTATGAAACAGG	93	2	Sub	N/A
1800	TTTATATGTAAGAGAGTTTGTATACAATGAAATAGTATATGTGTAACAGGTTGCTGCTTGGAAAGACAAGGATGGGGATTGGTATGAAACAGG	TTTATATGAAAGAGAGTTTGTATACAATGAAATAGTATATGTGAAACAGGTTGCTGCTTGGAAAGACAAGGATGGGGATTGGTATGAAACAGG	93	2	Sub	N/A
1801	TTTATATGTAAGAGAGTTTGTATACAATGAAATAGTATATGTGTAACAGGTTGCTGCTTGGAAAGACAAGGATGGGGATTGGTATGAAACAGG	TTTATATGTAAGAGAGTTTGTATACAATGAAATAGTATATGTGTAACAGGTTGCTGCTTGGAAAGACAAGGCTGGGGATTAGTATGAAACAGG	93	2	Sub	N/A
1802	TTTATATGTAAGAGAGTTTGTATACAATGAAATAGTATATGTGTAACAGGTTGCTGCTTGGAAAGACAAGGATGGGGATTGGTATGAAACAGG	TTTATATGTAAGAGAGCTTGTATACAATGAAATAGTATATGTGTAACAGGTTGCTGCTTGGAAAGACAAGGCTGGGGATTGGTATGAAACAGG	93	2	Sub	N/A
1803	TTTATATGTAAGAGAGTTTGTATACAATGAAATAGTATATGTGTAACAGGTTGCTGCTTGGAAAGACAAGGATGGGGATTGGTATGAAACAGG	TTTATATGTAAGAGAGTTTGTATACAATGAAATAGTATATGTGTAACAGGTTTCTGCTTGGAAAGACCAGGATGGGGATTTGTATGAAACAGG	93	2	Sub	N/A
1804	TTTATATGTAAGAGAGTTTGTATACAATGAAATAGTATATGTGTAACAGGTTGCTGCTTGGAAAGACAAGGATGGGGATTGGTATGAAACAGG	TTTATATGTAAGAGAGTTTGTATACAATGAAATAGTATATGTGTAACAGATTGCTGCTTGGAAAGAC----CTGGGGATTGGTATGAAACAGG	89	2	del	N/A
1805	TTTATATGTAAGAGAGTTTGTATACAATGAAATAGTATATGTGTAACAGGTTGCTGCTTGGAAAGACAAGGATGGGGATTGGTATGAAACAGG	TTTATATGTAAGAGAGTTTGTATATAATGAAACAGTGTATGTGTAACAGCTTGCTGCTTGGAAAGAC----ATGGGGATTGGTATGAAACAGG	89	2	del	N/A
1806	TTTATATGTAAGAGAGTTTGTATACAATGAAATAGTATATGTGTAACAGGTTGCTGCTTGGAAAGACAAGGATGGGGATTGGTATGAAACAGG	TTTATATGTAAGAGAGTTTGTATACAATGAAATAGTATATGTGTAACAGCTTGCTGCTTGGAAAGAC----ATGGGGATTGGTATGAAACAGG	89	2	del	N/A
1807	TTTATATGTAAGAGAGTTTGTATACAATGAAATAGTATATGTGTAACAGGTTGCTGCTTGGAAAGACAAGGATGGGGATTGGTATGAAACAGG	TTTATATGTAAGAGAGTTTGTATACAATGAAATAGTGTATGTGTAACGGGTTGATGCTTGGAAAGACAAGGATGGGGATTGGTATGAAACAGG	93	2	Sub	N/A
1808	TTTATATGTAAGAGAGTTTGTATACAATGAAATAGTATATGTGTAACAGGTTGCTGCTTGGAAAGACAAGGATGGGGATTGGTATGAAACAGG	TTTATGTGTAAGAGAGTTTGTATACAATGAAATAGTATATGTGTAACAGGTTGCTGCTTGGAAAGACAAGGTTGGGGATTGGTATGAAACAGG	93	2	Sub	N/A
1809	TTTATATGTAAGAGAGTTTGTATACAATGAAATAGTATATGTGTAACAGGTTGCTGCTTGGAAAGACAAGGATGGGGATTGGTATGAAACAGG	TTTATATGTAAGAGAGTTTGTATACAATGAAATAGTATATGTATAACAGGTTGATGCTTGGAAAGACAAGGCTGGGGATTGGTATGAAACAGG	93	2	Sub	N/A
1810	TTTATATGTAAGAGAGTTTGTATACAATGAAATAGTATATGTGTAACAGGTTGCTGCTTGGAAAGACAAGGATGGGGATTGGTATGAAACAGG	TTTATATGTAAGAGAGTTTGTATACAATGAAATAGTATATGTGTAATAGGTTGGTGCTTGGAAAGACAAGGGTGGGGATTGGTATGAAACAGG	93	2	Sub	N/A
1811	TTTATATGTAAGAGAGTTTGTATACAATGAAATAGTATATGTGTAACAGGTTGCTGCTTGGAAAGACAAGGATGGGGATTGGTATGAAACAGG	TTTATATGTAAGAGAGTTTGTATACAATGAAATAGTATATGTGTAACAGATTGCTGCTTGGAAAGAC----GTGGGGATTGGTATGAAACAGG	89	2	del	N/A
1812	TTTATATGTAAGAGAGTTTGTATACAATGAAATAGTATATGTGTAACAGGTTGCTGCTTGGAAAGACAAGGATGGGGATTGGTATGAAACAGG	TTTATATGTAAGAGAGTTTGTATACAATGAAATAGTATATGTGTAACTGGTTGCTGCTTGGAAATATTTGGATGGGGATTGGTATGAAACAGG	93	2	Sub	N/A
1813	TTTATATGTAAGAGAGTTTGTATACAATGAAATAGTATATGTGTAACAGGTTGCTGCTTGGAAAGACAAGGATGGGGATTGGTATGAAACAGG	TTTATATGTAAGAGAGTTTCTATACAATGAAATAGTATATGTGTAATAGGTTGCTGCTTGGAAAGACAAGGATGGGGATTGGTATGAAACAGG	93	2	Sub	N/A
1814	TTTATATGTAAGAGAGTTTGTATACAATGAAATAGTATATGTGTAACAGGTTGCTGCTTGGAAAGACAAGGATGGGGATTGGTATGAAACAGG	TTTATATGTAAGAGAGTTTGTATACAATGAAATAGTATATGTGTAATAGGTTGCTGCTTGGAAAGACCAGGATGGGGATTGGTATGAAACACG	93	2	Sub	N/A
1815	TTTATATGTAAGAGAGTTTGTATACAATGAAATAGTATATGTGTAACAGGTTGCTGCTTGGAAAGACAAGGATGGGGATTGGTATGAAACAGG	TTTATATGTAAGAGAGTTTGTATATAATGAAACAGTGTATGTGTAACAGGTTGCTGCTTGGAAAGAC----ATGGGGATTGCTATGAAACAGG	89	2	del	N/A
1816	TTTATATGTAAGAGAGTTTGTATACAATGAAATAGTATATGTGTAACAGGTTGCTGCTTGGAAAGACAAGGATGGGGATTGGTATGAAACAGG	TTTATATGTAAGAGAGTTTGTATACAATGAAATAGTATATGTGTAACAGGTTGCTGCTCGGAAAGACAACGATGGGGATTGGTATGAAACAGG	93	2	Sub	N/A
1817	TTTATATGTAAGAGAGTTTGTATACAATGAAATAGTATATGTGTAACAGGTTGCTGCTTGGAAAGACAAGGATGGGGATTGGTATGAAACAGG	TTTATATGTAAGAGAGTTTCTATACAATGAAATAGTATATGTGTAACAGGTTGCTGCTTGGAAAGACAAGGATGGGGATTGCTATGAAACAGG	93	2	Sub	N/A
1818	TTTATATGTAAGAGAGTTTGTATACAATGAAATAGTATATGTGTAACAGGTTGCTGCTTGGAAAGACAAGGATGGGGATTGGTATGAAACAGG	TTTATATGTAAGAGAGTTTGTATACAATGAAGTAGTATATGTGTAACAGGTTGCTGCTTGGAAAGACAAGGATGGGGATTGCTATGAAACAGG	93	2	Sub	N/A
1819	TTTATATGTAAGAGAGTTTGTATACAATGAAATAGTATATGTGTAACAGGTTGCTGCTTGGAAAGACAAGGATGGGGATTGGTATGAAACAGG	TTTATATGTAAGAGAGTTTGTATACAATGAAATAGTATATGTGTAACAGGTTGATGCTTGGAAAGAAAAGGATGGGGATTGCTATGAAACAGG	93	2	Sub	N/A
1820	TTTATATGTAAGAGAGTTTGTATACAATGAAATAGTATATGTGTAACAGGTTGCTGCTTGGAAAGACAAGGATGGGGATTGGTATGAAACAGG	TTTATATGTAAGAGAGTTTGTATACAATGAAATAGTATATGTGTAACAGGTTGCGGGTTGGAAAGACAAGGATGGGGGTTGGTATGAAACAGG	93	2	Sub	N/A
1821	TTTATATGTAAGAGAGTTTGTATACAATGAAATAGTATATGTGTAACAGGTTGCTGCTTGGAAAGACAAGGATGGGGATTGGTATGAAACAGG	TTTATATGTAAGAGAGTTTGTATACAATGAAATAGTATATGTGTAATAGGTTGCTGCTTGGAAAGAGTAGGATGGGGATTGGTATGAAACAGG	93	2	Sub	N/A
1822	TTTATATGTAAGAGAGTTTGTATACAATGAAATAGTATATGTGTAACAGGTTGCTGCTTGGAAAGACAAGGATGGGGATTGGTATGAAACAGG	TTTATATGTAAGAGAGTTTGTATACAATGAAATAGTATATGTGTAACGGGTTGCTGCTTGGGAAGACAAGGATGGGGATTGGTATGAAACAGG	93	2	Sub	N/A
1823	TTTATATGTAAGAGAGTTTGTATACAATGAAATAGTATATGTGTAACAGGTTGCTGCTTGGAAAGACAAGGATGGGGATTGGTATGAAACAGG	TTTATATGTAAGAGAGTTTGTATATAATGGAATAGTGTATGTGTAACGGGTTGCTGCTTGGAAAGACAAGGATGGGGATTGGTATGAAACACG	93	2	Sub	N/A
1824	TTTATATGTAAGAGAGTTTGTATACAATGAAATAGTATATGTGTAACAGGTTGCTGCTTGGAAAGACAAGGATGGGGATTGGTATGAAACAGG	TTTATATGTAAGAGAGTTTGTATACAATGAAATAGTATATGTGTAACAGGTTGCTGCTTGGAAAGAC----ATGGGGATGGGTATGAAACAGG	89	2	del	N/A
1825	TTTATATGTAAGAGAGTTTGTATACAATGAAATAGTATATGTGTAACAGGTTGCTGCTTGGAAAGACAAGGATGGGGATTGGTATGAAACAGG	TTTATATGTAAGAGAGTTTGTATACAATGAAATAGTATATGTGTAACAGGTTCATGCTTGGAAAGACAAGGATGGGGATTAGTATGAAACAGG	93	2	Sub	N/A
1826	TTTATATGTAAGAGAGTTTGTATACAATGAAATAGTATATGTGTAACAGGTTGCTGCTTGGAAAGACAAGGATGGGGATTGGTATGAAACAGG	TTTATATGTAAGAGAGTTTGTATACAATGAAATAGTATATGTGTAATAGGTTCCTGCTTGGAAAGACAAGGATGGGGATTGCTATGAAACAGG	93	2	Sub	N/A
1827	TTTATATGTAAGAGAGTTTGTATACAATGAAATAGTATATGTGTAACAGGTTGCTGCTTGGAAAGACAAGGATGGGGATTGGTATGAAACAGG	TTTATATGTAAGAGAGTTTGTATACAATGAAATAGTATATGTGTTATCGGTTGCTTCTTGGAAAGACAAGGATGGGGATTGGTATGAAACAGG	93	2	Sub	N/A
1828	TTTATATGTAAGAGAGTTTGTATACAATGAAATAGTATATGTGTAACAGGTTGCTGCTTGGAAAGACAAGGATGGGGATTGGTATGAAACAGG	TTTATATGTAAGAGAGTTTGTATACAATGAAATAGTATATGTGTAACAGGTTGCTGCTTGGAAAGACCAAGATGGGGATTGGTATGAAACAGG	93	2	Sub	N/A
1829	TTTATATGTAAGAGAGTTTGTATACAATGAAATAGTATATGTGTAACAGGTTGCTGCTTGGAAAGACAAGGATGGGGATTGGTATGAAACAGG	TTTATATGTAAGAGAGTTTGTATACAATGAAATAGTATATGTGTAACAGGTGGCTGCTGGGAAAGACAAGGATGGGGATTGGTATGAAAAAGG	93	2	Sub	N/A
1830	TTTATATGTAAGAGAGTTTGTATACAATGAAATAGTATATGTGTAACAGGTTGCTGCTTGGAAAGACAAGGATGGGGATTGGTATGAAACAGG	TTTATATGTAAGAGAGTTTGTATACAATGAAGTAGTATATGTGTAACAGGTTGCTGCTTGGAAAGACAAGGATGGGGATTTGTATGAAACAGG	93	2	Sub	N/A
1831	TTTATATGTAAGAGAGTTTGTATACAATGAAATAGTATATGTGTAACAGGTTGCTGCTTGGAAAGACAAGGATGGGGATTGGTATGAAACAGG	TTTATATGTAAGAGAGTTTGTATATAATGAAACAGTGTATGTGTAACAGGTTGCTGCTTGGAAAGACAAGGATGGGGATTGGTATGACACAGG	93	2	Sub	N/A
1832	TTTATATGTAAGAGAGTTTGTATACAATGAAATAGTATATGTGTAACAGGTTGCTGCTTGGAAAGACAAGGATGGGGATTGGTATGAAACAGG	TTTATATGTAAGAGAGTTTGTATACAATGAAATAGTAAATGTGTAATAGGTTGCTGCTTGGAAAGACAAGGATGGGGATTGGAATGAAACAGG	93	2	Sub	N/A
1833	TTTATATGTAAGAGAGTTTGTATACAATGAAATAGTATATGTGTAACAGGTTGCTGCTTGGAAAGACAAGGATGGGGATTGGTATGAAACAGG	TTTATATGTAAGAGAGTTTGTATACAATGAAATAGTATATGTGTAACAGGTTGCTGCTTGGAAAGACATGGATGGGGATTGGTATGCAACAGG	93	2	Sub	N/A
1834	TTTATATGTAAGAGAGTTTGTATACAATGAAATAGTATATGTGTAACAGGTTGCTGCTTGGAAAGACAAGGATGGGGATTGGTATGAAACAGG	TTTATATGTAAGAGAGTTTGTATACAATGAAATAGTATATGTGTAATAGGTTGCTGCTTGGCAAGACCAGGATGGGGATTGGTATGAAACACG	93	2	Sub	N/A
1835	TTTATATGTAAGAGAGTTTGTATACAATGAAATAGTATATGTGTAACAGGTTGCTGCTTGGAAAGACAAGGATGGGGATTGGTATGAAACAGG	TTTATATGTAAGAGAGTTTGTATACAATGAAATAGTATATGTGTAATAGGTTGCTGCTTGGAAAGACATGGATGGGGATTAGTATGAAACAGG	93	2	Sub	N/A
1836	TTTATATGTAAGAGAGTTTGTATACAATGAAATAGTATATGTGTAACAGGTTGCTGCTTGGAAAGACAAGGATGGGGATTGGTATGAAACAGG	TTTATATGTAAGAGAGTTTGTATACAATGAAATAGTATATGTGTAACCGGTTGCTGCTTGGAAAGAGAAGGATGGGGATTCGTATGAAACAGG	93	2	Sub	N/A
1837	TTTATATGTAAGAGAGTTTGTATACAATGAAATAGTATATGTGTAACAGGTTGCTGCTTGGAAAGACAAGGATGGGGATTGGTATGAAACAGG	TTTATATGTAAGAGAGTTTGTATACAATGAACTAGTATATGTGTAACCGGTTGCTGCTTGGAAAGACAAGGATGGGGATTGGTATGAAACAGG	93	2	Sub	N/A
1838	TTTATATGTAAGAGAGTTTGTATACAATGAAATAGTATATGTGTAACAGGTTGCTGCTTGGAAAGACAAGGATGGGGATTGGTATGAAACAGG	TTTATATGTAAGAGAGTTTGTATACTATGAAATAGTATATGTGTAACAGGTTGCTGCTTGGAAAGACAAGGATGGGGTTTGGTATGAAACAGG	93	2	Sub	N/A
1839	TTTATATGTAAGAGAGTTTGTATACAATGAAATAGTATATGTGTAACAGGTTGCTGCTTGGAAAGACAAGGATGGGGATTGGTATGAAACAGG	TTTATATGTAAGAGAGTTTGTATACAATGAAATAGTATATGTGTAACGGGTTGCTGCTTGGAAAGAGAAGGATGGGGATTAGTATGAAACAGG	93	2	Sub	N/A
1840	TTTATATGTAAGAGAGTTTGTATACAATGAAATAGTATATGTGTAACAGGTTGCTGCTTGGAAAGACAAGGATGGGGATTGGTATGAAACAGG	TTTATATGTAAGAGAGTTTGTATACAATGAAATAGTATATGTGTAACAGGTTGCTGCTTGGAAAGAGACGGATGGGGGTTGGTATGAAACAGG	93	2	Sub	N/A
1841	TTTATATGTAAGAGAGTTTGTATACAATGAAATAGTATATGTGTAACAGGTTGCTGCTTGGAAAGACAAGGATGGGGATTGGTATGAAACAGG	TTTATATGTAAGAGAGTTTGTATACAATGAAATAGTATATGTGTAATAGGTTGCTGCTTGGAAAGACAAGGATGGGGCTTGGTATGCAACAGG	93	2	Sub	N/A
1842	TTTATATGTAAGAGAGTTTGTATACAATGAAATAGTATATGTGTAACAGGTTGCTGCTTGGAAAGACAAGGATGGGGATTGGTATGAAACAGG	TTTATATGTAAGAGAGTTTGTATACAATGAAATAGTATATGTGTAATGGGTTGCTGCTTGGAAAGACAAGGATGGGGGTTGGTATGAAACAGG	93	2	Sub	N/A
1843	TTTATATGTAAGAGAGTTTGTATACAATGAAATAGTATATGTGTAACAGGTTGCTGCTTGGAAAGACAAGGATGGGGATTGGTATGAAACAGG	TTTATATGTAAGAGAGTTTGTATACAATGAAATAGTATATGTGTAATAGGTTTCTGCTTGGAAAGACAAGGATGGGGATTAGTATGAAACAGG	93	2	Sub	N/A
1844	TTTATATGTAAGAGAGTTTGTATACAATGAAATAGTATATGTGTAACAGGTTGCTGCTTGGAAAGACAAGGATGGGGATTGGTATGAAACAGG	TTTATATGTAAGAGAGTTTGTATACAATGAAATAGTATATGTGTAACAGGTTCCTGCTTGGAAAGAACGGGATGGGGCTTAGTATGAAACAGG	93	2	Sub	N/A
1845	TTTATATGTAAGAGAGTTTGTATACAATGAAATAGTATATGTGTAACAGGTTGCTGCTTGGAAAGACAAGGATGGGGATTGGTATGAAACAGG	TTTATATGTAAGAGAGTGTGTATACAATGAAATAGTATATGTGTAACAGGTTGCTGCTTGGAAAGACCAGGATGGGGATTGGTATGAAACAGG	93	2	Sub	N/A
1846	TTTATATGTAAGAGAGTTTGTATACAATGAAATAGTATATGTGTAACAGGTTGCTGCTTGGAAAGACAAGGATGGGGATTGGTATGAAACAGG	TTTATATGTAAGAGAGTTTGTATACAATGAAATAGTATATGTGTAACGGGTTGCTCCTTGGAAAGACGAGGATGGGGATTGGTATGAAACAGG	93	2	Sub	N/A
1847	TTTATATGTAAGAGAGTTTGTATACAATGAAATAGTATATGTGTAACAGGTTGCTGCTTGGAAAGACAAGGATGGGGATTGGTATGAAACAGG	TTTATATGTAAGAGAGTTTGCATACAATGAAATAGTATATGTGTAACAGGTTGCTGCTTGGAAAGACAAGGATGGGGATTAGTATGAAACAGG	93	2	Sub	N/A
1848	TTTATATGTAAGAGAGTTTGTATACAATGAAATAGTATATGTGTAACAGGTTGCTGCTTGGAAAGACAAGGATGGGGATTGGTATGAAACAGG	TTTATATGTAAGAGAGTTTGTATACAATGAAATAGTATATGTGTAACAGGTTGCTGCTTGGAAAGACAAGGATGGGGTTTGGTATGAAACAGT	93	2	Sub	N/A
1849	TTTATATGTAAGAGAGTTTGTATACAATGAAATAGTATATGTGTAACAGGTTGCTGCTTGGAAAGACAAGGATGGGGATTGGTATGAAACAGG	TTTATATGTAAGAGAGTTTGTATACAATGAACTAGTATATGTGTAACAGGTTGCTGCTTGGAAAGACAAGGATGGGGATTGGTATGACACAGG	93	2	Sub	N/A
1850	TTTATATGTAAGAGAGTTTGTATACAATGAAATAGTATATGTGTAACAGGTTGCTGCTTGGAAAGACAAGGATGGGGATTGGTATGAAACAGG	TTTATATGTAAGAGAGTTTGTATACAATGAAATAGTATATGTCTAACAGGTTGCTGCTTGGAAAGACAAGGATGGGGATTAGTATGAAACAGG	93	2	Sub	N/A
1851	TTTATATGTAAGAGAGTTTGTATACAATGAAATAGTATATGTGTAACAGGTTGCTGCTTGGAAAGACAAGGATGGGGATTGGTATGAAACAGG	TTTATATGTAAGAGAGTTTGTATACAATGAAATCGTATATGTGTAATAGGTTGCTGCTTGGAAAGACAAGGATGGGGATTGCTATGAAACAGG	93	2	Sub	N/A
1852	TTTATATGTAAGAGAGTTTGTATACAATGAAATAGTATATGTGTAACAGGTTGCTGCTTGGAAAGACAAGGATGGGGATTGGTATGAAACAGG	TTTATATGTAAGAGAGTTTGTATACAATGAAATAGTATATGTGTAACCGGTTGCTGCTAGGAAAGACAAGGATGGGGATTGGTATGAAACAGG	93	2	Sub	N/A
1853	TTTATATGTAAGAGAGTTTGTATACAATGAAATAGTATATGTGTAACAGGTTGCTGCTTGGAAAGACAAGGATGGGGATTGGTATGAAACAGG	TCTATATGTAAGAGAGTTTGTATATAATGAAA-AGTGTATGTGTAACAGGTTGCTGCTTGGAAAGACAAGGATGGGGATTGGTATGAAACAGG	92	2	del	N/A
1854	TTTATATGTAAGAGAGTTTGTATACAATGAAATAGTATATGTGTAACAGGTTGCTGCTTGGAAAGACAAGGATGGGGATTGGTATGAAACAGG	TTTATATGTAAGAGAGTTTGTATACAATGAAATAGTATATGTGTAACAGGTTGCTGCATGGAAAGACAAGGAAGGGGATTGGTATGCAACAGG	93	2	Sub	N/A
1855	TTTATATGTAAGAGAGTTTGTATACAATGAAATAGTATATGTGTAACAGGTTGCTGCTTGGAAAGACAAGGATGGGGATTGGTATGAAACAGG	TTTATATGTAAGAGAGTTTGTATACAATGAAATAGTATATGTGTAGCAGGTTGCTGCTTGGAAAGACAAGGATGGGGATTAGTATGAAACAGG	93	2	Sub	N/A
1856	TTTATATGTAAGAGAGTTTGTATACAATGAAATAGTATATGTGTAACAGGTTGCTGCTTGGAAAGACAAGGATGGGGATTGGTATGAAACAGG	TTTATATGTAAGAGAGTTTGTATACAATGAAATAGTATATGTGTAACAGGTGGATGCTGGGAAAGACAAGGATGGGGATTGGTATGAAACAGG	93	2	Sub	N/A
1857	TTTATATGTAAGAGAGTTTGTATACAATGAAATAGTATATGTGTAACAGGTTGCTGCTTGGAAAGACAAGGATGGGGATTGGTATGAAACAGG	TTTATATGTAAGAGAGTTTGTATACAATGAAATAGTATATGTGTAACAGGTTGCGGCTTGGAAAGATCAGGATGGGGATTTGTATGAAACAGG	93	2	Sub	N/A
1858	TTTATATGTAAGAGAGTTTGTATACAATGAAATAGTATATGTGTAACAGGTTGCTGCTTGGAAAGACAAGGATGGGGATTGGTATGAAACAGG	TTTATATGTAAGAGAGTTTGTATACAATGAAATAGTATATGTGTAATAGGTTGCTGCTTGGAAAGAGAAGGATGGGGATTGGTATGACACAGG	93	2	Sub	N/A
1859	TTTATATGTAAGAGAGTTTGTATACAATGAAATAGTATATGTGTAACAGGTTGCTGCTTGGAAAGACAAGGATGGGGATTGGTATGAAACAGG	TTTATATGTAAGAGAGTTTGTATACAATGAAATAGTATATGTGTAACCGGTTGCTGCTTGGAACGACAAGGATGGGGATTGGTATGAAACACG	93	2	Sub	N/A
1860	TTTATATGTAAGAGAGTTTGTATACAATGAAATAGTATATGTGTAACAGGTTGCTGCTTGGAAAGACAAGGATGGGGATTGGTATGAAACAGG	TTTATATGTAAGAGAGTTTGTATACAATGAAATAGTATATGTGTAACAGGTTGCTGCCTGGAAAGACAAGGATGGGGATTGGTATGAAACACG	93	2	Sub	N/A
1861	TTTATATGTAAGAGAGTTTGTATACAATGAAATAGTATATGTGTAACAGGTTGCTGCTTGGAAAGACAAGGATGGGGATTGGTATGAAACAGG	TTTATATGTAAGAGAGTTTGTATACAATGAAATAGTATATGTGTAACAGGTTGATGCTTGGAAAGACCAGGATGGGGATTGGTATGAAACACG	93	2	Sub	N/A
1862	TTTATATGTAAGAGAGTTTGTATACAATGAAATAGTATATGTGTAACAGGTTGCTGCTTGGAAAGACAAGGATGGGGATTGGTATGAAACAGG	TTTATATGTAAGAGAGTTTGTATACAATGAAATAGTATATGTGTAACAGGTTGCTGCTTGGAAAGAAACGGATGGGGATTAGTATGAAACAGG	93	2	Sub	N/A
1863	TTTATATGTAAGAGAGTTTGTATACAATGAAATAGTATATGTGTAACAGGTTGCTGCTTGGAAAGACAAGGATGGGGATTGGTATGAAACAGG	TTTATATGTAAGAGAGTTTGTATACAATGAAATAGTATATGTGTAACAGGTTGCTGCTTGGAAAGACCCGGATGGGGATTGGTATGAAACACG	93	2	Sub	N/A
1864	TTTATATGTAAGAGAGTTTGTATACAATGAAATAGTATATGTGTAACAGGTTGCTGCTTGGAAAGACAAGGATGGGGATTGGTATGAAACAGG	TTTATATGTAAGAGAGTTTGTATACAATGAAATAGTATATGTGTAATAGGTTGCTGCTTGGAAAGACAATGATGGGGATTAGTATGAAACAGG	93	2	Sub	N/A
1865	TTTATATGTAAGAGAGTTTGTATACAATGAAATAGTATATGTGTAACAGGTTGCTGCTTGGAAAGACAAGGATGGGGATTGGTATGAAACAGG	TTTATATGTAAGAGAGTTTGTATACAATGAAATAGTATATGTGTAACAGGTTGCTGCTGGGAAAGACCAGGATGGGGATTCGTATGAAACAGG	93	2	Sub	N/A
1866	TTTATATGTAAGAGAGTTTGTATACAATGAAATAGTATATGTGTAACAGGTTGCTGCTTGGAAAGACAAGGATGGGGATTGGTATGAAACAGG	TTTATATGTAAGAGAGTTTGTATACAATGAAATAGTATATGTGTAATAGGTTGCTGCTCGGAAAGACAAGGATGGGGATTCGTATGAAACAGG	93	2	Sub	N/A
1867	TTTATATGTAAGAGAGTTTGTATACAATGAAATAGTATATGTGTAACAGGTTGCTGCTTGGAAAGACAAGGATGGGGATTGGTATGAAACAGG	TTTATATGTAAGAGAGTTTGTATACAATGAAATAGTATATGTGTAACAGGTTGCTGCTTGGAAAGACGTGGATGGGGATTCGTATGAAACAGG	93	2	Sub	N/A
1868	TTTATATGTAAGAGAGTTTGTATACAATGAAATAGTATATGTGTAACAGGTTGCTGCTTGGAAAGACAAGGATGGGGATTGGTATGAAACAGG	TTTATATGTAAGAGAGTTTGTATACAATGAAATAGTATATGTGTAACAGGTTGCTGCTTGNAAAGANAAGGATGGGGATTGGTATGAAACAGG	93	2	Sub	N/A
1869	TTTATATGTAAGAGAGTTTGTATACAATGAAATAGTATATGTGTAACAGGTTGCTGCTTGGAAAGACAAGGATGGGGATTGGTATGAAACAGG	TTTATATGTAAGAGAGTTTGTAGACAATGAAATAGTATATGTGTAACAGGTTGCTGCTTGGAAAGACAAGGATGGGGATTCGTATGAAACAGG	93	2	Sub	N/A
1870	TTTATATGTAAGAGAGTTTGTATACAATGAAATAGTATATGTGTAACAGGTTGCTGCTTGGAAAGACAAGGATGGGGATTGGTATGAAACAGG	TTTATATGTAAGAGAGTTTGTATATAATGGAATGGTGTATGTGTAACGGGTTGCTGCTTGGAAAGACAAGGATGGGGATTGGTATGAAACAGG	93	2	Sub	N/A
1871	TTTATATGTAAGAGAGTTTGTATACAATGAAATAGTATATGTGTAACAGGTTGCTGCTTGGAAAGACAAGGATGGGGATTGGTATGAAACAGG	TTTATATGTAAGAGAGTTTGTATACAATGAAATAGTATATGTGTAACAGGTTGCTACTTGGAAAGACAAGGATGGGGATTGGTATGACACAGG	93	2	Sub	N/A
1872	TTTATATGTAAGAGAGTTTGTATACAATGAAATAGTATATGTGTAACAGGTTGCTGCTTGGAAAGACAAGGATGGGGATTGGTATGAAACAGG	TTTATATGTAAGAGAGTTTGTATACAATGAAATAGTATATGTGTAATAGGTTCCTGCTTGGAAAGACAAGGATGGGGATTCGTATGAAACAGG	93	2	Sub	N/A
1873	TTTATATGTAAGAGAGTTTGTATACAATGAAATAGTATATGTGTAACAGGTTGCTGCTTGGAAAGACAAGGATGGGGATTGGTATGAAACAGG	TTTATATGTAAGAGAGTTTGTATACAATGAAATAGTATATGTGTAACAGGTTGCTGCTTGGAGAGACAAGGATGGGGATTGCTATGAAACAGG	93	2	Sub	N/A
1874	TTTATATGTAAGAGAGTTTGTATACAATGAAATAGTATATGTGTAACAGGTTGCTGCTTGGAAAGACAAGGATGGGGATTGGTATGAAACAGG	TTTATATGTAAGAGAGTTTGTATACAATGAAATAGTATATGTGTAACAGGTTGTTGCTTGGAAAGACACGGATGGGGATTGGTATGAAACAGG	93	2	Sub	N/A
1875	TTTATATGTAAGAGAGTTTGTATACAATGAAATAGTATATGTGTAACAGGTTGCTGCTTGGAAAGACAAGGATGGGGATTGGTATGAAACAGG	TTTATATGTAAGAGAGTTTGTATACAATGAAATAGTATATGTGTAACAGGTTGCTGCTTGGAAAGAACAGGATGGGGATTGGTATGACACAGG	93	2	Sub	N/A
1876	TTTATATGTAAGAGAGTTTGTATACAATGAAATAGTATATGTGTAACAGGTTGCTGCTTGGAAAGACAAGGATGGGGATTGGTATGAAACAGG	TTTATATGTAAGAGAGTTTGTATACAATGAAATAGTATATGTGTAACAGGTTGCTGCTTGGACAGACCAGGATGGGGATTAGTATGAAACAGG	93	2	Sub	N/A
1877	TTTATATGTAAGAGAGTTTGTATACAATGAAATAGTATATGTGTAACAGGTTGCTGCTTGGAAAGACAAGGATGGGGATTGGTATGAAACAGG	TTTATATGTAAGAGAGTTTGTATACAATGAAATAGTATATGTGTAATGGGTTGAAGCTTGGAAAGACGAGGATGGGGATTGGTATGAAACAGG	93	2	Sub	N/A
1878	TTTATATGTAAGAGAGTTTGTATACAATGAAATAGTATATGTGTAACAGGTTGCTGCTTGGAAAGACAAGGATGGGGATTGGTATGAAACAGG	TTTATATGTAAGAGAGTTTGTATACAATGAAATAGTATATGTGTAATAGGTTGCTGCTTGGAAAGACCAGGATGGGGCTTTGTATGAAACAGG	93	2	Sub	N/A
1879	TTTATATGTAAGAGAGTTTGTATACAATGAAATAGTATATGTGTAACAGGTTGCTGCTTGGAAAGACAAGGATGGGGATTGGTATGAAACAGG	TTTATATGTAAGAGAGTTTGTATACAATGAAATAGTATATGTGTAATAGGTTGCTGCTTGCAAAGACAAGGATGGGGATTGGTATGAAACAAG	93	2	Sub	N/A
1880	TTTATATGTAAGAGAGTTTGTATACAATGAAATAGTATATGTGTAACAGGTTGCTGCTTGGAAAGACAAGGATGGGGATTGGTATGAAACAGG	TTTATATGTAAGAGAGTTTGTATACAATGAAATAGTATATGTGTAACAGGTTGCTGCTTGGAAAGACTAGGATGGGGCTTCGTATGAAACAGG	93	2	Sub	N/A
1881	TTTATATGTAAGAGAGTTTGTATACAATGAAATAGTATATGTGTAACAGGTTGCTGCTTGGAAAGACAAGGATGGGGATTGGTATGAAACAGG	TTTATATGTAAGAAAGTTTATATATAATGAAACAGTGTATGTGTAACAGGTTGCTGCTTGGAAAGAC----ATGGGGATTGGTATGAAACAGG	89	2	del	N/A
1882	TTTATATGTAAGAGAGTTTGTATACAATGAAATAGTATATGTGTAACAGGTTGCTGCTTGGAAAGACAAGGATGGGGATTGGTATGAAACAGG	TTTATATGTAAGAGAGTTTGTATACAATGAAATAGTATATGTGTAACGGGTTGCTGCTTGGAAAGACAAGGATGGGGTTTGGTATGAAACAGG	93	2	Sub	N/A
1883	TTTATATGTAAGAGAGTTTGTATACAATGAAATAGTATATGTGTAACAGGTTGCTGCTTGGAAAGACAAGGATGGGGATTGGTATGAAACAGG	TTTATATGTAAGAGAGTTTGTATACAATGAAATAGTATATGTGTAATAGGTTGCTGCTTGGAAAGACGAGGATGGGGATTGGTATGAAACACG	93	2	Sub	N/A
1884	TTTATATGTAAGAGAGTTTGTATACAATGAAATAGTATATGTGTAACAGGTTGCTGCTTGGAAAGACAAGGATGGGGATTGGTATGAAACAGG	TTTATATGTAAGAGAGTTTGTATACGATGAAATAGTATATGTGTAACAGGTTGCTGCTTGGAAAGACAAGGATGGGGATTGGAATGAAACAGG	93	2	Sub	N/A
1885	TTTATATGTAAGAGAGTTTGTATACAATGAAATAGTATATGTGTAACAGGTTGCTGCTTGGAAAGACAAGGATGGGGATTGGTATGAAACAGG	TTTATATGTAAGAGAGTTTGTATACAATGAAATAGTATATGTGTAACTGGTTGCTGCTTGGAAAGATTTGGATGGGGGTTGCTATGAAACAGG	93	2	Sub	N/A
1886	TTTATATGTAAGAGAGTTTGTATACAATGAAATAGTATATGTGTAACAGGTTGCTGCTTGGAAAGACAAGGATGGGGATTGGTATGAAACAGG	TTTATATGTAGGAGAGTTTGTATACAATGAAATAGTATATGTGTAACAGGTTGCTGCTTGGAAAGACAAGGATGGGGATTGGTATGACACAGG	93	2	Sub	N/A
1887	TTTATATGTAAGAGAGTTTGTATACAATGAAATAGTATATGTGTAACAGGTTGCTGCTTGGAAAGACAAGGATGGGGATTGGTATGAAACAGG	TTTATATGTAAGAGAGTTTGTATACAATGAAATAGTATATGTGTAACAGGTTCCTGCTTGGAAAGACAAGGATGGGGCTTAGTATGAAACAGG	93	2	Sub	N/A
1888	TTTATATGTAAGAGAGTTTGTATACAATGAAATAGTATATGTGTAACAGGTTGCTGCTTGGAAAGACAAGGATGGGGATTGGTATGAAACAGG	TTTATATGTAAGAGAGTTTGTATACAATGAAATAGTATATGTGTAACAGGTTTCTGCTTGGAAAGAAAAGGATGGGGATTTGTATGAAACAGG	93	2	Sub	N/A
1889	TTTATATGTAAGAGAGTTTGTATACAATGAAATAGTATATGTGTAACAGGTTGCTGCTTGGAAAGACAAGGATGGGGATTGGTATGAAACAGG	TTTATATGTAAGAGAGTTTGTATACAATGAAATAGTATATGTGTAATAGGTTNCTGCTTGNAAAGACAAGGATGGGGATTGGTATGAAACAGG	93	2	Sub	N/A
1890	TTTATATGTAAGAGAGTTTGTATACAATGAAATAGTATATGTGTAACAGGTTGCTGCTTGGAAAGACAAGGATGGGGATTGGTATGAAACAGG	TTTATATGTAAGAGAGTTTGTATACAATGAAATAGTATATGTGTACCAGGTTGCTGCTGGGAAAGACAAGGATGGGGATTGGTATGAAACAGG	93	2	Sub	N/A
1891	TTTATATGTAAGAGAGTTTGTATACAATGAAATAGTATATGTGTAACAGGTTGCTGCTTGGAAAGACAAGGATGGGGATTGGTATGAAACAGG	TTTATATGTAAGAGAGTTTGTATACAATGAAATAGTATATGTGTAATAGGTTGAGGCTTGGAAAGACAAGGATGGGGATTGGTATGAAACAGG	93	2	Sub	N/A
1892	TTTATATGTAAGAGAGTTTGTATACAATGAAATAGTATATGTGTAACAGGTTGCTGCTTGGAAAGACAAGGATGGGGATTGGTATGAAACAGG	TTTATATGTAAGAGAGTTTGTATACAATGAAATAGTATATGTGTAACTGGTTGCTGCTTGGAAAGAGAAGGATGGGGATTGGTATGAAACAAG	93	2	Sub	N/A
1893	TTTATATGTAAGAGAGTTTGTATACAATGAAATAGTATATGTGTAACAGGTTGCTGCTTGGAAAGACAAGGATGGGGATTGGTATGAAACAGG	TTTATATGTAAGAGAGTTTGTATACAATGAAATAGTATATGTGTAACAGGTTGCTGCTTGGAAAGAACGGGATGGGGATTTGTATGAAACAGG	93	2	Sub	N/A
1894	TTTATATGTAAGAGAGTTTGTATACAATGAAATAGTATATGTGTAACAGGTTGCTGCTTGGAAAGACAAGGATGGGGATTGGTATGAAACAGG	TTTATATGTAAGAGAGTTGGTATACAATGAAATAGTATATGTGTAATAGGTTGCTGCTTGGAAAGACAAGGATGGGGATTGGTATGAAACAGG	93	2	Sub	N/A
1895	TTTATATGTAAGAGAGTTTGTATACAATGAAATAGTATATGTGTAACAGGTTGCTGCTTGGAAAGACAAGGATGGGGATTGGTATGAAACAGG	TTTATATGTAAGAGAGTTTGTATACAATGAAATAGTTTATGTGTAATAGGTTGCTGCTTGGAAAGACAAGGATGGGGATTGGTATGAAACAGG	93	2	Sub	N/A
1896	TT-----------------------------------------------------TATATGTAAGAGAGTTTGTATACAATGAAATAGTATATGTGTAACAGGTTGCTGCTTGGAAAGACAAGGATGGGGATTGGTATGAAACAGG	TTTATATGTAAGAGAGTTTGTATACAATGAAATAGTATATGTGTAACAGGTTGCATATATGTAAGAGAGTTTGTATACAATGAAATAGTATATGTGTAACAGGTTGCTGCTTGGAAAGACAAGGATGGGGATTGGTATGAAACAGG	146	2	Ins	N/A
1897	TTTATATGTAAGAGAGTTTGTATACAATGAAATAGTATATGTGTAACAGGTTGCTGCTTGGAAAGACAAGGATGGGGATTGGTATGAAACAGG	TTTATATGTAAGAGAGTTTGTATACAATGAAATAGTATATGTGTAACAGGTTGCTGCTTGGAAAGACTAGGATGGGGATTGGTATGGAACAGG	93	2	Sub	N/A
1898	TTTATATGTAAGAGAGTTTGTATACAATGAAATAGTATATGTGTAACAGGTTGCTGCTTGGAAAGACAAGGATGGGGATTGGTATGAAACAGG	TTTATATGTAAGAGAGTTTGTATACAATGAAATAGTATATGTGTAACAGGTTGCTGCTTGGAAAGAAAAGGAGGGGGATTGGTATGAAACAGG	93	2	Sub	N/A
